# Supplementary material for: The SMARCA5–DMRT1 Pioneer Complex Establishes Epigenetic Priming to Direct Male Germline Development
Source: Research Square preprint supplement (doi:10.21203/rs.3.rs-7576931/v1), 2025-10-08
Supplement: Supplementary file 1 [file 0b1aeda58b0514100be2158a.xlsx]

## Sheet: P8 Smarca5-ctrl Aundiff DMRT1
Supplementary Table 5: DMRT1 peaks in eash sample, listed in sepaeate tabs.
Chr	Start	End	Annotation	Detailed Annotation	Distance to TSS	Nearest PromoterID	Entrez ID	Nearest Unigene	Nearest Refseq	Nearest Ensembl	Gene Name	Gene Alias	Gene Description	Gene Type
chr12	16012840	16013306	Intergenic	(TTCTC)n|Simple_repeat|Simple_repeat	-196288	NM_144551	217410	Mm.491136	NM_144551	ENSMUSG00000020601	Trib2	AW319517|TRB-2|TRB2	tribbles pseudokinase 2	protein-coding
chr12	3109828	3110115	Intergenic	GSAT_MM|Satellite|Satellite	-125820	NR_015551	74173	Mm.309774	NM_028796	ENSMUSG00000079179	Rab10os	1700012B15Rik|1810036A22Rik	RAB10, member RAS oncogene family, opposite strand	ncRNA
chr18	79885786	79886090	Intergenic	A-rich|Low_complexity|Low_complexity	-133356	NM_001370903	102640717		NM_001370903		Gm36718	-	predicted gene, 36718	protein-coding
chr9	35305242	35305639	Intergenic	GSAT_MM|Satellite|Satellite	24335	NR_040715	71133	Mm.158577	NR_040715	ENSMUSG00000111746	4933422A05Rik	-	RIKEN cDNA 4933422A05 gene	ncRNA
chr4	111236713	111236977	intron (NM_001284190, intron 5 of 12)	GA-rich|Low_complexity|Low_complexity	-178161	NR_033793	67621	Mm.45533	NM_026279	ENSMUSG00000028545	Bend5	2310026E23Rik	BEN domain containing 5	protein-coding
chr6	103649056	103649338	intron (NM_007697, intron 4 of 26)	SYNREP_MM|Satellite|Satellite	138321	NM_007697	12661	Mm.251288	NM_007697	ENSMUSG00000030077	Chl1	A530023M13Rik|AI465420|CALL|LICAM2	cell adhesion molecule L1-like	protein-coding
chr13	69511158	69511402	intron (NM_001169131, intron 4 of 12)	(GAGAA)n|Simple_repeat|Simple_repeat	22584	NM_001169131	210106	Mm.315959	NM_198600	ENSMUSG00000034575	Tent4a	LAK-1|POLK|Papd7|Pols|TRF4|TRF4-1	terminal nucleotidyltransferase 4A	protein-coding
chr3	159939391	159939699	TTS (NM_001356350)	TTS (NM_001356350)	99895	NM_001356349	68151	Mm.6766	NM_026582	ENSMUSG00000028173	Wls	5031439A09Rik|AI173978|AI987742|EVI|Gpr177	wntless WNT ligand secretion mediator	protein-coding
chr19	61331276	61331564	Intergenic	(TTAGGG)n|Simple_repeat|Simple_repeat	-103002	NM_009970	12982	Mm.287228	NM_009970	ENSMUSG00000059326	Csf2ra	CD116|Csfgmra|GM-CSF-Ra|GM-CSFR	colony stimulating factor 2 receptor, alpha, low-affinity (granulocyte-macrophage)	protein-coding
chr12	97061363	97061861	Intergenic	Intergenic	-1014390	NR_103800	69423	Mm.46121	NM_027076		1700019M22Rik	-	NFX-like protein	pseudo
chr16	98107444	98107775	Intergenic	(TTAGGG)n|Simple_repeat|Simple_repeat	-25170	NR_015491	320586	Mm.442230	NR_015491	ENSMUSG00000116673	A630089N07Rik	-	RIKEN cDNA A630089N07 gene	ncRNA
chr6	147118912	147119768	Intergenic	Intergenic	28265	NM_001081237	232539	Mm.491206	NM_001081237	ENSMUSG00000040102	Klhl42	A330079N23Rik|AI450355|C230080I20Rik|Ctb9|Klhdc5|mKIAA1340	kelch-like 42	protein-coding
chr12	120028664	120029037	Intergenic	(TTAGGG)n|Simple_repeat|Simple_repeat	82888	NM_001160385	217951	Mm.387395	NM_001160385	ENSMUSG00000048004	Tmem196	Gm528	transmembrane protein 196	protein-coding
chr2	98666258	98667320	Intergenic	GSAT_MM|Satellite|Satellite	1199132	NM_001363049	241568	Mm.241682	NM_178725	ENSMUSG00000050587	Lrrc4c	6430556C10Rik|NGL-1	leucine rich repeat containing 4C	protein-coding
chr17	27999534	28000403	intron (NM_181413, intron 11 of 24)	intron (NM_181413, intron 11 of 24)	80616	NM_013687	21463	Mm.29758	NM_013687	ENSMUSG00000062859	Tcp11	D17Ken1|Tcp-11	t-complex protein 11	protein-coding
chr7	145340933	145341450	Intergenic	(TTAGGG)n|Simple_repeat|Simple_repeat	26356	NM_203490	211578	Mm.370299	NM_203490	ENSMUSG00000051207	Mrgprd	Gm499|Mgrd|MrgD|TGR7	MAS-related GPR, member D	protein-coding
chrX	170758201	170758513	Intergenic	(TTAGGG)n|Simple_repeat|Simple_repeat	85713	NM_001199212	107626	Mm.486144	NM_001199212	ENSMUSG00000093806	Asmt	Hiomt	acetylserotonin O-methyltransferase	protein-coding
chr9	49944869	49945087	Intergenic	(TTCTC)n|Simple_repeat|Simple_repeat	-145585	NM_001311065	17967	Mm.4974	NM_010875	ENSMUSG00000039542	Ncam1	CD56|E-NCAM|NCAM-1|Ncam	neural cell adhesion molecule 1	protein-coding
chr14	30962317	30963104	intron (NM_001308328, intron 5 of 13)	intron (NM_001308328, intron 5 of 13)	11333	NM_001308328	23955	Mm.251494	NM_011849	ENSMUSG00000021918	Nek4	Stk2	NIMA (never in mitosis gene a)-related expressed kinase 4	protein-coding
chr12	53800832	53801447	intron (NM_001370962, intron 4 of 11)	intron (NM_001370962, intron 4 of 11)	402735	NM_028133	112407	Mm.133037	NM_028133	ENSMUSG00000035105	Egln3	2610021G09Rik|AI505553|AI648162|Hif-p4h-3|Phd3|SM-20	egl-9 family hypoxia-inducible factor 3	protein-coding
chr9	123284835	123285640	Intergenic	Intergenic	-24448	NM_001002267	72309	Mm.8569	NM_001002267	ENSMUSG00000054871	Tmem158	2310037P21Rik|Ris1	transmembrane protein 158	protein-coding
chr18	90602156	90602631	Intergenic	(TTAGGG)n|Simple_repeat|Simple_repeat	22568	NM_001362365	108168395	Mm.391131	NM_001362365	ENSMUSG00000110277	Gm45871	-	predicted gene 45871	protein-coding
chr4	98153484	98153730	Intergenic	(GAGAA)n|Simple_repeat|Simple_repeat	229658	NM_053157	94043	Mm.331719	NM_053157	ENSMUSG00000028563	Tm2d1	2310026L18Rik|AA990549|Bbp	TM2 domain containing 1	protein-coding
chr14	96083623	96083876	Intergenic	(TTCTC)n|Simple_repeat|Simple_repeat	202483	NM_025733	66732	Mm.75060	NM_025733	ENSMUSG00000034689	Spertl	4921530L21Rik	spermatid associated like	protein-coding
chr2	129658022	129658579	Intergenic	Intergenic	40358	NM_001286502	18610	Mm.6239	NM_018863	ENSMUSG00000027400	Pdyn	Dyn	prodynorphin	protein-coding
chr1	195371660	195372003	Intergenic	(TTAGGG)n|Simple_repeat|Simple_repeat	-195112	NM_007758	12902	Mm.235387	NM_007758	ENSMUSG00000026616	Cr2	C3DR|CD21|CD35|Cr-1|Cr-2|Cr1	complement receptor 2	protein-coding
chr14	124801562	124802231	Intergenic	(TTAGGG)n|Simple_repeat|Simple_repeat	-124769	NM_207667	14169	Mm.206362	NM_010201	ENSMUSG00000025551	Fgf14	FHF-4|Fhf4|Tg(tetO-MAPT*P301L)4510Kha|mFHF-4(1B)	fibroblast growth factor 14	protein-coding
chrX	134371457	134372031	Intergenic	Intergenic	-33036	NM_010078	13497	Mm.121662	NM_010078	ENSMUSG00000000223	Drp2	AW495265|DRP-2	dystrophin related protein 2	protein-coding
chr6	141372391	141372619	intron (NM_018779, intron 1 of 15)	(TTCTC)n|Simple_repeat|Simple_repeat	31952	NR_033555	100093700	Mm.483778	NR_033555	ENSMUSG00000107456	Gm10400	-	predicted gene 10400	ncRNA
chr14	100265857	100266665	Intergenic	Intergenic	-116465	NM_010636	16597	Mm.396499	NM_010636	ENSMUSG00000072294	Klf12	2700063E05Rik|AI225908|AI315654|AP-2rep|B130052C06Rik|D530033K05Rik	Kruppel-like factor 12	protein-coding
chr1	69121611	69121841	Intergenic	(CAAGA)n|Simple_repeat|Simple_repeat	-13667	NM_010154	13869	Mm.442420	NM_010154	ENSMUSG00000062209	Erbb4	Her4|c-erbB-4	erb-b2 receptor tyrosine kinase 4	protein-coding
chr16	64472454	64472729	Intergenic	(TTCTC)n|Simple_repeat|Simple_repeat	129740	NM_173861	224291	Mm.246580	NM_173861	ENSMUSG00000068167	Csnka2ip	Ckt2	casein kinase 2, alpha prime interacting protein	protein-coding
chrX	10629624	10629923	Intergenic	CT-rich|Low_complexity|Low_complexity	-87592	NM_001166635	68041	Mm.29429	NM_026524	ENSMUSG00000008035	Mid1ip1	3110038L01Rik|Mig12|S14R	Mid1 interacting protein 1 (gastrulation specific G12-like (zebrafish))	protein-coding
chr2	182012729	182013213	Intergenic	(TTAGGG)n|Simple_repeat|Simple_repeat	21745	NM_001205282	672125	Mm.489571	NM_001205282	ENSMUSG00000098505	Gm14496	-	predicted gene 14496	protein-coding
chr8	113059294	113059528	Intergenic	(GA)n|Simple_repeat|Simple_repeat	-7851	NR_033584	791378	Mm.350576	NR_033584	ENSMUSG00000110541	Gm10280	-	predicted gene 10280	ncRNA
chr15	57843285	57844284	Intergenic	Intergenic	48634	NM_024207	67819	Mm.289387	NM_024207	ENSMUSG00000022365	Derl1	1110021N07Rik|AI195141|AW551338|Derlin-1	Der1-like domain family, member 1	protein-coding
chr8	8447126	8447412	Intergenic	(CAGAG)n|Simple_repeat|Simple_repeat	213973	NM_001368299	13642	Mm.209813	NM_010111	ENSMUSG00000001300	Efnb2	ELF-2|Epl5|Eplg5|Htk-L|LERK-5|Lerk5|NLERK-1	ephrin B2	protein-coding
chr17	75655306	75655949	Intergenic	MTEb|LTR|ERVL-MaLR	-103681	NM_001357860	72722	Mm.24641	NM_133747	ENSMUSG00000002017	Fam98a	2810405J04Rik|AL024114	family with sequence similarity 98, member A	protein-coding
chr3	152502507	152503598	intron (NM_001081277, intron 9 of 13)	intron (NM_001081277, intron 9 of 13)	106368	NM_001287139	108946	Mm.379292	NM_198416	ENSMUSG00000039068	Zzz3	3110065C23Rik|6430567E01Rik|AA408566|AI481057|AW556059|R75514	zinc finger, ZZ domain containing 3	protein-coding
chr9	77684363	77685054	Intergenic	Intergenic	47976	NM_172925	244923	Mm.138238	NM_172925	ENSMUSG00000044938	Klhl31	9830147P19Rik|D930047P17Rik|Kbtbd1	kelch-like 31	protein-coding
chr15	88931002	88931260	intron (NM_001357736, intron 7 of 11)	intron (NM_001357736, intron 7 of 11)	23287	NM_172818	239591	Mm.86807	NM_172818	ENSMUSG00000022388	Ttll8	1700019P01Rik|4933401B17	tubulin tyrosine ligase-like family, member 8	protein-coding
chr9	50814744	50815524	intron (NR_045601, intron 12 of 13)	intron (NR_045601, intron 12 of 13)	39909	NR_045601	102580	Mm.160035	NM_133981	ENSMUSG00000032059	Alg9	8230402H15Rik|AI747665|B430313H07Rik|Dibd1	asparagine-linked glycosylation 9 (alpha 1,2 mannosyltransferase)	protein-coding
chr18	81600147	81601147	Intergenic	Intergenic	391433	NR_039589	100628596		NR_039589	ENSMUSG00000093036	Mir5127	mmu-mir-5127|mu-mir-5127	microRNA 5127	ncRNA
chr17	64616512	64617349	intron (NM_008549, intron 1 of 21)	intron (NM_008549, intron 1 of 21)	15281	NM_008549	17158	Mm.2433	NM_008549	ENSMUSG00000024085	Man2a1	Mana-2|Mana2|Map-2	mannosidase 2, alpha 1	protein-coding
chr6	147236740	147236953	Intergenic	(TCTA)n|Simple_repeat|Simple_repeat	6955	NR_157236	102639797	Mm.384511	NR_157236		Gm15767	-	predicted gene 15767	ncRNA
chr13	9321225	9321481	intron (NM_001081426, intron 1 of 36)	CT-rich|Low_complexity|Low_complexity	44828	NM_001081426	208440	Mm.217326	NM_172459	ENSMUSG00000048264	Dip2c	2900024P20Rik|9630044M06|mKIAA0934	disco interacting protein 2 homolog C	protein-coding
chr2	145698739	145699307	Intergenic	(TATTG)n|Simple_repeat|Simple_repeat	-2172	NR_033220	408057	Mm.486711	NR_033220	ENSMUSG00000001768	BC039771	-	cDNA sequence BC039771	ncRNA
chr4	101271877	101272674	Intergenic	MTEb|LTR|ERVL-MaLR	-6993	NM_146145	16451	Mm.289657	NM_013567	ENSMUSG00000028530	Jak1	AA960307|BAP004|C130039L05Rik	Janus kinase 1	protein-coding
chr13	57415779	57416431	Intergenic	Intergenic	492227	NM_001166463	20745	Mm.379020	NM_009262	ENSMUSG00000056222	Spock1	Spock|Ticn1|testican	sparc/osteonectin, cwcv and kazal-like domains proteoglycan 1	protein-coding
chr5	149383059	149383716	Intergenic	Intergenic	-28362	NM_027519	70717	Mm.252139	NM_027519	ENSMUSG00000029659	Medag	6330406I15Rik|Awms3|MEDA-4|Meda4|mAWMS3	mesenteric estrogen dependent adipogenesis	protein-coding
chr10	130333191	130333416	intron (NM_183264, intron 1 of 8)	(GAGAA)n|Simple_repeat|Simple_repeat	10451	NM_183264	67596	Mm.131264	NM_183264	ENSMUSG00000034833	Tespa1	5830405N20Rik|A430001F24Rik|AI450549|Itprid3	thymocyte expressed, positive selection associated 1	protein-coding
chr17	4795483	4796227	Intergenic	Intergenic	160875	NR_130984	75117	Mm.429393	NR_130984	ENSMUSG00000116767	4930517M08Rik	-	RIKEN cDNA 4930517M08 gene	ncRNA
chr8	7650530	7650763	Intergenic	(GAGAA)n|Simple_repeat|Simple_repeat	1010596	NM_001368299	13642	Mm.209813	NM_010111	ENSMUSG00000001300	Efnb2	ELF-2|Epl5|Eplg5|Htk-L|LERK-5|Lerk5|NLERK-1	ephrin B2	protein-coding
chr11	22270251	22270855	intron (NM_153078, intron 2 of 24)	intron (NM_153078, intron 2 of 24)	16242	NM_153078	216565	Mm.491265	NM_153078	ENSMUSG00000042302	Ehbp1	AF424697|Flj21950|NACSIN	EH domain binding protein 1	protein-coding
chr18	84642710	84643608	intron (NM_177450, intron 1 of 11)	intron (NM_177450, intron 1 of 11)	6936	NM_177450	338403	Mm.23278	NM_177450	ENSMUSG00000056162	Cndp1	AI746433|Cn1	carnosine dipeptidase 1 (metallopeptidase M20 family)	protein-coding
chr6	145910463	145911173	Intergenic	RMER21B|LTR|ERV1	-21055	NM_001310837	16651	Mm.49689	NM_010656	ENSMUSG00000030255	Sspn	Krag	sarcospan	protein-coding
chr16	22672642	22673274	Intergenic	Intergenic	-15727	NM_138650	110197	Mm.194986	NM_138650	ENSMUSG00000022861	Dgkg	2900055E17Rik|90kDa|AI854428|Dagk3|E430001K23Rik|mKIAA4131	diacylglycerol kinase, gamma	protein-coding
chr1	168420334	168420916	intron (NM_001291508, intron 2 of 7)	intron (NM_001291508, intron 2 of 7)	11544	NM_183355	18514	Mm.43358	NM_008783	ENSMUSG00000052534	Pbx1	2310056B04Rik|D230003C07Rik|Pbx-1	pre B cell leukemia homeobox 1	protein-coding
chr1	191030578	191031296	Intergenic	Intergenic	-4747	NM_001081259	226844	Mm.134053	NM_198025	ENSMUSG00000066595	Flvcr1	9630055N22Rik|FLVCR|Mfsd7b	feline leukemia virus subgroup C cellular receptor 1	protein-coding
chr1	165854451	165855304	intron (NR_103716, intron 1 of 8)	intron (NR_103716, intron 1 of 8)	66196	NR_103716	12503	Mm.217308	NM_031162	ENSMUSG00000005763	Cd247	4930549J05Rik|A430104F18Rik|AW552088|Cd3|Cd3-eta|Cd3-zeta|Cd3h|Cd3z|Cd3zeta|T3z|Tcrk|Tcrz	CD247 antigen	protein-coding
chr8	125122386	125123072	intron (NM_174853, intron 3 of 11)	intron (NM_174853, intron 3 of 11)	68534	NM_174853	244667	Mm.233504	NM_170596	ENSMUSG00000043051	Disc1	-	disrupted in schizophrenia 1	protein-coding
chr6	145678829	145679735	Intergenic	Intergenic	63319	NM_009449	22147	Mm.270295	NM_009449	ENSMUSG00000067338	Tuba3b	M[a]7|Tuba7	tubulin, alpha 3B	protein-coding
chr14	19416903	19417938	Intergenic	GSAT_MM|Satellite|Satellite	185167	NM_001024706	432825	Mm.327147	NM_001024706	ENSMUSG00000095024	Gm5458	EG432825	predicted gene 5458	protein-coding
chr8	12719396	12720387	promoter-TSS (NR_033546)	promoter-TSS (NR_033546)	-764	NR_033546	100038554	Mm.367723	NR_033546	ENSMUSG00000074469	Gm15348	-	predicted gene 15348	ncRNA
chr10	123426169	123426675	intron (NM_001252387, intron 1 of 4)	intron (NM_001252387, intron 1 of 4)	162346	NM_182807	268354	Mm.51939	NM_182807	ENSMUSG00000044071	Tafa2	6330575M02|FAM19A2 TAFA-2|Fam19a2|Sam2|Tafa-2	TAFA chemokine like family member 2	protein-coding
chr12	69654049	69654338	intron (NM_001135559, intron 2 of 22)	intron (NM_001135559, intron 2 of 22)	27659	NM_001135559	20663	Mm.3770	NM_001135559	ENSMUSG00000034801	Sos2	SOS-2|mSOS-2	SOS Ras/Rho guanine nucleotide exchange factor 2	protein-coding
chr18	73288820	73289464	Intergenic	Intergenic	-283563	NM_001039214	240396	Mm.24131	NM_001039214	ENSMUSG00000037253	Mex3c	A130001D14Rik|BC035207|BM-013|Rkhd2	mex3 RNA binding family member C	protein-coding
chr18	81992569	81993398	promoter-TSS (NR_039589)	promoter-TSS (NR_039589)	-903	NR_039589	100628596		NR_039589	ENSMUSG00000093036	Mir5127	mmu-mir-5127|mu-mir-5127	microRNA 5127	ncRNA
chr11	76377772	76378391	intron (NM_008750, intron 1 of 7)	intron (NM_008750, intron 1 of 7)	21060	NM_008750	18230	Mm.27915	NM_008750	ENSMUSG00000020844	Nxn	l11Jus13	nucleoredoxin	protein-coding
chr7	115949293	115949829	intron (NM_001025559, intron 1 of 15)	intron (NM_001025559, intron 1 of 15)	45525	NM_011445	20679	Mm.323365	NM_011445	ENSMUSG00000051910	Sox6	AI987981|SOX-LZ	SRY (sex determining region Y)-box 6	protein-coding
chr17	34353275	34354278	Intergenic	Intergenic	-1046	NM_079835	547431	Mm.441007	NM_079835	ENSMUSG00000024340	Btnl2	BTL-II|BTLN2|Btl2|Gm315|NG9	butyrophilin-like 2	protein-coding
chr16	45944228	45945448	promoter-TSS (NR_152227)	promoter-TSS (NR_152227)	-768	NR_152226	100503378	Mm.387133	NR_152226	ENSMUSG00000085826	Gm15638	Gm41457	predicted gene 15638	ncRNA
chr18	72469915	72470155	Intergenic	RLTR12A|LTR|ERVK	-118966	NM_007831	13176	Mm.167882	NM_007831	ENSMUSG00000060534	Dcc	C030036D22Rik|Igdcc1	deleted in colorectal carcinoma	protein-coding
chr4	149528156	149528865	intron (NM_023465, intron 1 of 4)	intron (NM_023465, intron 1 of 4)	-9353	NR_049189	100885828		NR_049189	ENSMUSG00000093403	Mir5616	Gm25191|mir-5616|mmu-mir-5616	microRNA 5616	ncRNA
chr3	79000473	79001194	Intergenic	Intergenic	144913	NM_001310536	76089	Mm.31220	NM_001099624	ENSMUSG00000062232	Rapgef2	5830453M24Rik|CNRasGEF|Pdzgef1|RA-GEF-1|mKIAA0313|nRapGEP	Rap guanine nucleotide exchange factor (GEF) 2	protein-coding
chr14	32510316	32511037	Intergenic	Intergenic	-2845	NM_001081221	319955	Mm.318310	NM_001081221	ENSMUSG00000054051	Ercc6	4732403I04|C130058G22Rik|CSB	excision repair cross-complementing rodent repair deficiency, complementation group 6	protein-coding
chr11	80915648	80916416	intron (NM_001034013, intron 3 of 9)	MTEa|LTR|ERVL-MaLR	57643	NM_029367	75622	Mm.26988	NM_029367	ENSMUSG00000053184	Spaca3	1700025M08Rik|ALLP17|Lyc3|SLLP1|mSLLP1	sperm acrosome associated 3	protein-coding
chr13	120321362	120321659	Intergenic	(TTAGGG)n|Simple_repeat|Simple_repeat	4648	NM_153523	236219	Mm.302175	NM_153523	ENSMUSG00000095821	Tcstv3	-	2-cell-stage, variable group, member 3	protein-coding
chr9	62874294	62874996	intron (NM_001102468, intron 3 of 3)	intron (NM_001102468, intron 3 of 3)	-12621	NR_003965	677044	Mm.422004	NR_003965	ENSMUSG00000074250	Gm10653	-	ribsomal protein S2 pseudogene	pseudo
chr19	29628903	29629629	intron (NM_001081213, intron 6 of 14)	intron (NM_001081213, intron 6 of 14)	19149	NM_001362131	226090	Mm.267131	NM_001081213	ENSMUSG00000046324	Ermp1	D19Ertd410e|D19Wsu12e|Fxna|b2b2633Clo|mKIAA1815	endoplasmic reticulum metallopeptidase 1	protein-coding
chr1	106410481	106410791	Intergenic	(GAGAA)n|Simple_repeat|Simple_repeat	135995	NR_106164	102466254		NR_106164	ENSMUSG00000098344	Mir3473f	Gm27846|mmu-mir-3473f	microRNA 3473f	ncRNA
chr9	3024060	3024642	Intergenic	GSAT_MM|Satellite|Satellite	14392	NR_039546	100628572		NR_039546	ENSMUSG00000106183	Mir101c	mir-101c|mmu-mir-101c	microRNA 101c	ncRNA
chr4	32341321	32341953	Intergenic	Intergenic	-75798	NM_001109661	12014	Mm.491223	NM_007521	ENSMUSG00000040270	Bach2	E030004N02Rik	BTB and CNC homology, basic leucine zipper transcription factor 2	protein-coding
chr14	46309292	46310107	Intergenic	IMPB_01|Satellite|Satellite	-69825	NR_037981	100041724	Mm.383311	NM_001099324	ENSMUSG00000079261	Gm15217	-	predicted gene 15217	ncRNA
chr19	17292508	17293020	Intergenic	Intergenic	46741	NM_001136484	14537	Mm.244825	NM_010265	ENSMUSG00000038843	Gcnt1	5630400D21Rik|B130048E03|C2 GlcNAcT|C2GNT|IGnT	glucosaminyl (N-acetyl) transferase 1, core 2	protein-coding
chr5	107136911	107137933	intron (NM_011578, intron 11 of 16)	intron (NM_011578, intron 11 of 16)	152207	NM_011578	21814	Mm.200775	NM_011578	ENSMUSG00000029287	Tgfbr3	1110036H20Rik|AU015626|AW215636|TBRIII	transforming growth factor, beta receptor III	protein-coding
chr3	104093038	104094002	intron (NM_001159354, intron 3 of 20)	intron (NM_001159354, intron 3 of 20)	-125204	NR_030676	100125931	Mm.400392	NR_030676	ENSMUSG00000089998	Phtf1os	A130049A11Rik	putative homeodomain transcription factor 1, opposite strand	ncRNA
chr4	33158193	33158823	intron (NM_008075, intron 7 of 9)	intron (NM_008075, intron 7 of 9)	25952	NM_008075	14408	Mm.14116	NM_008075	ENSMUSG00000028280	Gabrr1	GABA-C	gamma-aminobutyric acid (GABA) C receptor, subunit rho 1	protein-coding
chr16	94057017	94057989	Intergenic	Intergenic	-27757	NM_011377	20465	Mm.4775	NM_011377	ENSMUSG00000062713	Sim2	bHLHe15	single-minded family bHLH transcription factor 2	protein-coding
chr1	60369300	60369900	intron (NM_001313721, intron 5 of 11)	intron (NM_001313721, intron 5 of 11)	26300	NM_030013	77951	Mm.197640	NM_030013	ENSMUSG00000049439	Cyp20a1	A930011N14Rik|Cypm	cytochrome P450, family 20, subfamily a, polypeptide 1	protein-coding
chr8	90680281	90680514	Intergenic	(GAGAA)n|Simple_repeat|Simple_repeat	136996	NR_157160	100503868	Mm.442076	NR_157160	ENSMUSG00000110332	Gm19935	Gm45396	predicted gene, 19935	ncRNA
chr13	56097760	56098287	intron (NM_012015, intron 4 of 8)	intron (NM_012015, intron 4 of 8)	37527	NM_001159513	26914	Mm.283802	NM_012015	ENSMUSG00000015937	H2afy	H2AF12M|mH2a1|macroH2A1	H2A histone family, member Y	protein-coding
chr4	102091316	102092006	Intergenic	Intergenic	104821	NM_001085520	381536	Mm.297685	NM_001085520	ENSMUSG00000078625	Gm12789	-	predicted gene 12789	protein-coding
chr13	46228575	46229392	Intergenic	Intergenic	-44738	NM_001005422	380842	Mm.188108	NM_001005422	ENSMUSG00000063529	Stmnd1	Gm1574	stathmin domain containing 1	protein-coding
chr1	17713170	17713407	intron (NR_130314, intron 2 of 6)	(TTCTC)n|Simple_repeat|Simple_repeat	-13757	NM_001356551	83691	Mm.289625	NM_031402	ENSMUSG00000025776	Crispld1	Cocoacrisp|Lcrisp1	cysteine-rich secretory protein LCCL domain containing 1	protein-coding
chr5	27321089	27321737	intron (NM_001136060, intron 1 of 25)	intron (NM_001136060, intron 1 of 25)	59478	NM_001136060	13483	Mm.42078	NM_010075	ENSMUSG00000061576	Dpp6	B930011P16Rik|D5Buc3|D5Buc4|D5Buc5|DPP VI|Dpp-6|Gm1377|In(5)6H-p|Peplb|Rw	dipeptidylpeptidase 6	protein-coding
chr10	21013970	21014968	intron (NM_026203, intron 17 of 23)	intron (NM_026203, intron 17 of 23)	-26351	NM_001177776	52906	Mm.253280	NM_026203	ENSMUSG00000019986	Ahi1	1700015F03Rik|Ahi-1|D10Bwg0629e	Abelson helper integration site 1	protein-coding
chr8	124159114	124159658	Intergenic	Intergenic	-72008	NM_139272	108148	Mm.33808	NM_139272	ENSMUSG00000089704	Galnt2	AI480629	polypeptide N-acetylgalactosaminyltransferase 2	protein-coding
chr19	41010462	41011070	non-coding (NR_155302, exon 1 of 3)	non-coding (NR_155302, exon 1 of 3)	912	NR_155302	100861913	Mm.35204	NR_155302		C330026H20Rik	-	RIKEN cDNA C330026H20 gene	ncRNA
chr9	115672781	115673750	Intergenic	MTE2b|LTR|ERVL-MaLR	-236190	NM_028638	73748	Mm.485018	NM_028638	ENSMUSG00000056880	Gadl1	1110027M19Rik|ADC|CSADC	glutamate decarboxylase-like 1	protein-coding
chr1	18354864	18355080	Intergenic	(TTCTC)n|Simple_repeat|Simple_repeat	-89834	NM_183124	77673	Mm.99530	NM_183124	ENSMUSG00000067773	Defb41	9230102D03Rik|BD-17|Bd-41|Defb16|Defb17|Gm15386	defensin beta 41	protein-coding
chr3	49066959	49067210	Intergenic	(CACAA)n|Simple_repeat|Simple_repeat	-457984	NR_003617	66332	Mm.46124	NM_025493		1700018B24Rik	-	enhancer of rudimentary homolog pseudogene	pseudo
chr2	161282287	161282913	Intergenic	(TATG)n|Simple_repeat|Simple_repeat	-173514	NR_126509	71389	Mm.122738	NM_173368	ENSMUSG00000057133	Chd6	5430439G14Rik|6330406J24Rik|CHD-6	chromodomain helicase DNA binding protein 6	protein-coding
chrX	170880969	170881309	Intergenic	(TTAGGG)n|Simple_repeat|Simple_repeat	208495	NM_001199212	107626	Mm.486144	NM_001199212	ENSMUSG00000093806	Asmt	Hiomt	acetylserotonin O-methyltransferase	protein-coding
chr15	100981713	100982418	intron (NM_001077499, intron 11 of 26)	intron (NM_001077499, intron 11 of 26)	45794	NM_011323	20273	Mm.385012	NM_011323	ENSMUSG00000023033	Scn8a	AI853486|C630029C19Rik|NaCh6|Nav1.6|dmu|med|mnd-2|mnd2|nmf2|nmf335|nmf58|nur14|seal	sodium channel, voltage-gated, type VIII, alpha	protein-coding
chr7	98060032	98060265	intron (NM_008663, intron 39 of 48)	(AATAG)n|Simple_repeat|Simple_repeat	49100	NM_001256083	17921	Mm.1403	NM_008663	ENSMUSG00000030761	Myo7a	Hdb|Myo7|USH1B|nmf371|polka|sh-1|sh1	myosin VIIA	protein-coding
chr13	39385533	39386189	Intergenic	Intergenic	-424982	NM_001170431	108652	Mm.255506	NM_134060	ENSMUSG00000021432	Slc35b3	4921526O06Rik|AI428480|CGI-19|PABST2|PAPST2	solute carrier family 35, member B3	protein-coding
chr9	108728669	108729459	intron (NM_008924, intron 5 of 10)	intron (NM_008924, intron 5 of 10)	36921	NM_008924	19087	Mm.253102	NM_008924	ENSMUSG00000032601	Prkar2a	1110061A24Rik|AI317181|AI836829|RII(alpha)	protein kinase, cAMP dependent regulatory, type II alpha	protein-coding
chr10	130594406	130595009	Intergenic	(TTAGGG)n|Simple_repeat|Simple_repeat	-97328	NM_001103366	625131	Mm.469844	NM_001103366	ENSMUSG00000091511	Vmn2r87	EG625131	vomeronasal 2, receptor 87	protein-coding
chr9	31889859	31890729	intron (NM_013800, intron 1 of 3)	intron (NM_013800, intron 1 of 3)	22991	NM_013800	12023	Mm.261044	NM_013800	ENSMUSG00000032033	Barx2	2310006E12Rik|Barx2b	BarH-like homeobox 2	protein-coding
chr9	118849201	118849862	intron (NM_001113514, intron 8 of 13)	intron (NM_001113514, intron 8 of 13)	-77005	NM_133710	69274	Mm.439928	NM_133710	ENSMUSG00000047409	Ctdspl	2810418J22Rik|AI426263|HYA22|SCP3	CTD (carboxy-terminal domain, RNA polymerase II, polypeptide A) small phosphatase-like	protein-coding
chr15	93467927	93469232	intron (NM_175363, intron 8 of 8)	intron (NM_175363, intron 8 of 8)	50941	NM_001364846	106042	Mm.150314	NM_001033217	ENSMUSG00000036158	Prickle1	1110058P22Rik|AW215793|Prickle|b2b019Clo|mpk1	prickle planar cell polarity protein 1	protein-coding
chr6	53806670	53807407	Intergenic	MLT1C|LTR|ERVL-MaLR	13787	NM_025817	66873	Mm.422727	NM_025817	ENSMUSG00000043496	Tril	1200009O22Rik|AI316813|mKIAA0644	TLR4 interactor with leucine-rich repeats	protein-coding
chr8	90834404	90835243	intron (NM_177224, intron 1 of 39)	intron (NM_177224, intron 1 of 39)	5988	NM_177224	109151	Mm.100615	NM_177224	ENSMUSG00000056608	Chd9	1810014J18Rik|9030205D12Rik|A330063D19Rik|AD013|PRIC320|mKIAA0308	chromodomain helicase DNA binding protein 9	protein-coding
chr5	106233481	106234045	Intergenic	MTE2b|LTR|ERVL-MaLR	-87577	NR_136913	102635633	Mm.383511	NR_136913	ENSMUSG00000105508	Gm32921	-	predicted gene, 32921	ncRNA
chr12	103034050	103034815	intron (NM_001081017, intron 7 of 48)	intron (NM_001081017, intron 7 of 48)	85573	NM_001081017	217843	Mm.387073	NM_177621	ENSMUSG00000021198	Unc79	9030205A07Rik|Mlca3	unc-79 homolog	protein-coding
chr16	24446132	24446681	intron (NM_178665, intron 2 of 12)	intron (NM_178665, intron 2 of 12)	-1685	NM_001145952	210126	Mm.209385	NM_178665	ENSMUSG00000033306	Lpp	9430020K16Rik|AA959454|AU024130|B130055L10Rik|C79715|D630048H16	LIM domain containing preferred translocation partner in lipoma	protein-coding
chr4	100794910	100795725	intron (NM_198037, intron 1 of 26)	(TTAG)n|Simple_repeat|Simple_repeat	18638	NM_198037	320508	Mm.151962	NM_198037	ENSMUSG00000028532	Cachd1	1190007F10Rik|AI852726|B430218L07Rik|Vwcd1|mKIAA1573	cache domain containing 1	protein-coding
chr18	67258332	67259252	Intergenic	Intergenic	-12962	NM_001357518	225651	Mm.235792	NM_172630	ENSMUSG00000062526	Mppe1	Pgap5	metallophosphoesterase 1	protein-coding
chr19	57849249	57850105	intron (NM_181415, intron 26 of 28)	intron (NM_181415, intron 26 of 28)	-201490	NR_049196	100885835		NR_049196	ENSMUSG00000093757	Mir5623	Gm26068|mir-5623|mmu-mir-5623	microRNA 5623	ncRNA
chr14	101552432	101552643	intron (NM_001081278, intron 1 of 18)	(GAGAA)n|Simple_repeat|Simple_repeat	56654	NM_001081278	210789	Mm.320639	NM_173380	ENSMUSG00000033083	Tbc1d4	5930406J04Rik|A930035N22|AV295684|As160	TBC1 domain family, member 4	protein-coding
chr14	51957814	51958014	Intergenic	(GAGAA)n|Simple_repeat|Simple_repeat	-26919	NM_001145921	268739	Mm.9239	NM_198249	ENSMUSG00000004562	Arhgef40	E130112L23Rik|Gm669|Solo	Rho guanine nucleotide exchange factor (GEF) 40	protein-coding
chr5	147920768	147921596	Intergenic	Intergenic	-26367	NM_001357002	71706	Mm.153218	NM_027872	ENSMUSG00000029650	Slc46a3	1200006F02Rik	solute carrier family 46, member 3	protein-coding
chr3	152139317	152139944	intron (NM_016867, intron 1 of 5)	intron (NM_016867, intron 1 of 5)	26270	NM_016867	54120	Mm.97	NM_016867	ENSMUSG00000039131	Gipc2	2200002N01Rik|AU021850|Semcap2	GIPC PDZ domain containing family, member 2	protein-coding
chr19	4230425	4232017	promoter-TSS (NM_027196)	promoter-TSS (NM_027196)	-672	NM_027196	69745	Mm.32518	NM_027196	ENSMUSG00000024854	Pold4	2410012M21Rik|AI463381|AW060307|Polds|p12	polymerase (DNA-directed), delta 4	protein-coding
chr7	139301875	139302732	Intergenic	Intergenic	53821	NM_001098636	101631	Mm.334300	NM_001033206	ENSMUSG00000060260	Pwwp2b	AI594893|D7Ertd517e|D930023J19Rik|Pwwp2	PWWP domain containing 2B	protein-coding
chr8	124446074	124447050	Intergenic	MTEa|LTR|ERVL-MaLR	-12626	NM_171824	209966	Mm.234233	NM_171824	ENSMUSG00000050751	Pgbd5	2900019M05Rik|AI854313	piggyBac transposable element derived 5	protein-coding
chr6	39745707	39746490	Intergenic	B1F|SINE|Alu	-20635	NM_139294	109880	Mm.245513	NM_139294	ENSMUSG00000002413	Braf	9930012E13Rik|AA120551|AA387315|AA473386|B-raf|Braf-2|Braf2|C230098H17|C87398|D6Ertd631e	Braf transforming gene	protein-coding
chr19	44001829	44002928	Intergenic	L1MB3|LINE|L1	-15858	NM_030703	93721	Mm.206774	NM_030703	ENSMUSG00000025196	Cpn1	0610011F20Rik|CPN	carboxypeptidase N, polypeptide 1	protein-coding
chr5	73495297	73495780	intron (NM_178896, intron 1 of 10)	intron (NM_178896, intron 1 of 10)	4512	NM_178896	100737	Mm.220312	NM_178896	ENSMUSG00000051674	Dcun1d4	AI836376	DCN1, defective in cullin neddylation 1, domain containing 4 (S. cerevisiae)	protein-coding
chr15	97100300	97101191	Intergenic	Intergenic	-44789	NM_027052	69354	Mm.250980	NM_027052	ENSMUSG00000022464	Slc38a4	1110012E16Rik|1700012A18Rik|Ata3|mATA3|mNAT3	solute carrier family 38, member 4	protein-coding
chr6	91669138	91670015	Intergenic	Intergenic	-14491	NM_009320	21366	Mm.395650	NM_009320	ENSMUSG00000030096	Slc6a6	AA589629|C80501|Taut	solute carrier family 6 (neurotransmitter transporter, taurine), member 6	protein-coding
chr2	71701291	71702226	intron (NR_039557, intron 2 of 3)	intron (NR_039557, intron 2 of 3)	-17659	NR_037979	381371	Mm.330284	NM_201366	ENSMUSG00000064263	Platr26	Gm1631	pluripotency associated transcript 26	ncRNA
chr8	12795491	12796248	intron (NR_121603, intron 1 of 29)	intron (NR_121603, intron 1 of 29)	36050	NR_045775	100504249	Mm.441494	NR_045775	ENSMUSG00000084780	Gm15350	-	predicted gene 15350	ncRNA
chr3	154517463	154518101	Intergenic	Intergenic	-78929	NM_009968	12972	Mm.374855	NM_009968	ENSMUSG00000028199	Cryz	Sez9	crystallin, zeta	protein-coding
chr3	27895207	27895943	intron (NM_001164437, intron 1 of 3)	intron (NM_001164437, intron 1 of 3)	793	NM_001164437	208613	Mm.59189	NM_001164437	ENSMUSG00000043164	Tmem212	E030011K20Rik|Gm564	transmembrane protein 212	protein-coding
chr13	91680060	91680900	intron (NM_001360776, intron 8 of 15)	intron (NM_001360776, intron 8 of 15)	-61041	NM_028790	74156	Mm.275963	NM_028790	ENSMUSG00000021620	Acot12	1300004O04Rik|4930449F15Rik|AV027244|Cach|mCACH-1	acyl-CoA thioesterase 12	protein-coding
chr1	33894506	33895209	intron (NM_177235, intron 1 of 6)	intron (NM_177235, intron 1 of 6)	12764	NM_177235	320705	Mm.336619	NM_177235	ENSMUSG00000042182	Bend6	B230209C24Rik	BEN domain containing 6	protein-coding
chr1	151574585	151575197	intron (NM_022018, intron 1 of 13)	intron (NM_022018, intron 1 of 13)	3518	NM_022018	63913	Mm.157700	NM_022018	ENSMUSG00000026483	Fam129a	AI256368|AU019833|Niban	family with sequence similarity 129, member A	protein-coding
chr3	144745211	144746149	intron (NM_009899, intron 11 of 13)	intron (NM_009899, intron 11 of 13)	15297	NM_009899	12722	Mm.454553	NM_009899	ENSMUSG00000056025	Clca3a1	Cacc|Clca1	chloride channel accessory 3A1	protein-coding
chr13	12236869	12237836	intron (NM_001081128, intron 11 of 32)	RMER1A|Other|Other	20761	NM_001081128	238505	Mm.40335	NM_001081128	ENSMUSG00000021311	Mtr	AI894170|D830038K18Rik|MS	5-methyltetrahydrofolate-homocysteine methyltransferase	protein-coding
chr10	26709178	26709783	Intergenic	Intergenic	-34829	NR_033633	667572	Mm.482728	NR_033633	ENSMUSG00000098179	Gm8709	EG667572	glyceraldehyde-3-phosphate dehydrogenase pseudogene	pseudo
chr16	18050054	18050622	Intergenic	Intergenic	-2522	NM_010047	13353	Mm.27155	NM_010047	ENSMUSG00000003531	Dgcr6	-	DiGeorge syndrome critical region gene 6	protein-coding
chr10	117786068	117786736	intron (NM_134010, intron 4 of 27)	intron (NM_134010, intron 4 of 27)	6303	NM_134010	103468	Mm.12568	NM_134010	ENSMUSG00000052798	Nup107	AW541137|C76801	nucleoporin 107	protein-coding
chr18	11288583	11288842	Intergenic	(CCCA)n|Simple_repeat|Simple_repeat	-236145	NR_105022	68434	Mm.57626	NR_105022	ENSMUSG00000097222	1010001N08Rik	Gata6as	RIKEN cDNA 1010001N08 gene	ncRNA
chr15	78537170	78537764	3' UTR (NM_001356961, exon 2 of 2)	3' UTR (NM_001356961, exon 2 of 2)	3939	NM_001356961	20607	Mm.211411	NM_009218	ENSMUSG00000044933	Sstr3	Smstr-3|Smstr3|sst3	somatostatin receptor 3	protein-coding
chr9	106026166	106026435	intron (NM_026763, intron 24 of 37)	intron (NM_026763, intron 24 of 37)	-65657	NM_001167923	665033	Mm.39826	NM_001167923	ENSMUSG00000091345	Col6a5	Col29a1|EG665033|Gm7455	collagen, type VI, alpha 5	protein-coding
chr19	18671234	18672228	intron (NM_026120, intron 1 of 7)	intron (NM_026120, intron 1 of 7)	951	NM_026120	67383	Mm.306602	NM_026120	ENSMUSG00000024726	Carnmt1	2410127L17Rik	carnosine N-methyltransferase 1	protein-coding
chr8	47390618	47391034	Intergenic	Intergenic	-38478	NM_175162	71069	Mm.23973	NM_175162	ENSMUSG00000038143	Stox2	4933409N07Rik|AI449080|AI835114|mKIAA1392	storkhead box 2	protein-coding
chr18	84418677	84419303	intron (NM_001033341, intron 4 of 8)	intron (NM_001033341, intron 4 of 8)	170514	NM_001033341	240476	Mm.329575	NM_001033341	ENSMUSG00000048410	Zfp407	6430585N13Rik|Gm333|Gm334|Gm948|ZNF407	zinc finger protein 407	protein-coding
chr9	115614590	115615274	Intergenic	MTE2b|LTR|ERVL-MaLR	233113	NR_130329	100316675		NR_130329	ENSMUSG00000080409	Mir467h	Mirn467h|mmu-mir-467h	microRNA 467h	ncRNA
chr5	17468676	17469389	Intergenic	Lx2A1|LINE|L1	-7090	NM_027609	70935	Mm.332225	NM_027609	ENSMUSG00000058643	Speer4f1	4922502J04Rik|SPEER-4F|Speer4f	spermatogenesis associated glutamate (E)-rich protein 4F1	protein-coding
chr15	95828200	95828964	intron (NR_155276, intron 1 of 1)	(TG)n|Simple_repeat|Simple_repeat	1490	NR_155276	102634389	Mm.440563	NR_155276	ENSMUSG00000078648	LOC102634389	-	uncharacterized LOC102634389	ncRNA
chr1	54820633	54821688	intron (NM_001081433, intron 2 of 27)	intron (NM_001081433, intron 2 of 27)	105227	NM_001081433	329154	Mm.397910	NM_001081433	ENSMUSG00000052331	Ankrd44	4930444A19Rik|A130096K20|E130014H08Rik|PP6-ARS-B	ankyrin repeat domain 44	protein-coding
chr12	83024205	83024628	intron (NM_015812, intron 3 of 16)	MTE2b|LTR|ERVL-MaLR	-85261	NR_046045	74283	Mm.398247	NR_046045	ENSMUSG00000100890	1700085C21Rik	-	RIKEN cDNA 1700085C21 gene	ncRNA
chr15	85318297	85318665	Intergenic	MER44D|DNA|TcMar-Tigger	-17774	NM_016843	54138	Mm.248906	NM_016843	ENSMUSG00000016541	Atxn10	AI325283|C77170|E46|Sca10|TEG-169|Tex169	ataxin 10	protein-coding
chr16	91072147	91072982	Intergenic	Intergenic	-3412	NM_001163695	74387	Mm.236220	NM_028905	ENSMUSG00000039851	4932438H23Rik	4931406G06Rik|AI550392	RIKEN cDNA 4932438H23 gene	protein-coding
chr16	94675801	94677344	intron (NM_001113389, intron 8 of 11)	intron (NM_001113389, intron 8 of 11)	65153	NM_001347731	13548	Mm.310973	NM_007890	ENSMUSG00000022897	Dyrk1a	2310043O08Rik|D16Ertd272e|D16Ertd493e|Dyrk|Gm10783|Mnbh|Mp86|mmb	dual-specificity tyrosine-(Y)-phosphorylation regulated kinase 1a	protein-coding
chr15	23114737	23115209	intron (NM_001081299, intron 1 of 11)	RLTR17B_Mm|LTR|ERVK	78510	NM_001081299	320865	Mm.241965	NM_001081299	ENSMUSG00000040420	Cdh18	B230220E17Rik|Cdh14l|Tg(GFAP-APOE_i4)1Hol	cadherin 18	protein-coding
chr8	80275126	80275951	Intergenic	Intergenic	-217530	NM_020259	15245	Mm.254493	NM_020259	ENSMUSG00000064325	Hhip	Hhip1	Hedgehog-interacting protein	protein-coding
chr4	150375705	150376540	intron (NM_001085492, intron 1 of 22)	intron (NM_001085492, intron 1 of 22)	94206	NM_001085492	68703	Mm.291274	NM_001085492	ENSMUSG00000039852	Rere	1110033A15Rik|AI414665|ARG|ARP|ATN1L|AW742570|Atr2|DNB1|eye<m03Jus>|eyes3|mKIAA0458	arginine glutamic acid dipeptide (RE) repeats	protein-coding
chr13	59811589	59812456	intron (NM_153538, intron 6 of 27)	B3A|SINE|B2	11125	NM_153538	214290	Mm.233082	NM_153538	ENSMUSG00000035248	Tut7	6030448M23Rik|AA420405|Tent3b|Zcchc6	terminal uridylyl transferase 7	protein-coding
chr2	18765555	18766351	Intergenic	Intergenic	-5091	NR_126079	100041479	Mm.393659	NR_126079	ENSMUSG00000092353	Gm3363	-	predicted gene 3363	ncRNA
chr8	124707439	124707856	intron (NM_001357357, intron 4 of 19)	intron (NM_001357357, intron 4 of 19)	14347	NM_001357356	234875	Mm.38436	NM_145607	ENSMUSG00000037300	Ttc13	BC017545	tetratricopeptide repeat domain 13	protein-coding
chr5	131593575	131594529	intron (NM_001363480, intron 5 of 19)	intron (NM_001363480, intron 5 of 19)	-179334	NR_152164	545809	Mm.357553	NR_152164	ENSMUSG00000105387	Gm29681	Gm42590	predicted gene, 29681	ncRNA
chr9	45113760	45114426	intron (NR_033547, intron 1 of 2)	L2c|LINE|L2	-3783	NM_001014761	72821	Mm.229373	NM_001014761	ENSMUSG00000070304	Scn2b	2810451E09Rik|AI840361|Gm183	sodium channel, voltage-gated, type II, beta	protein-coding
chr5	15535471	15536235	Intergenic	Lx2A1|LINE|L1	-6631	NM_001310449	100861755	Mm.382859	NM_001310449	ENSMUSG00000106445	Gm21190	-	predicted gene, 21190	protein-coding
chr13	73776673	73777173	intron (NM_001360694, intron 1 of 24)	intron (NM_001360694, intron 1 of 24)	13226	NM_011390	20499	Mm.275800	NM_011390	ENSMUSG00000017756	Slc12a7	AA408796|D13Ertd261e|Kcc4	solute carrier family 12, member 7	protein-coding
chr9	41331764	41332667	Intergenic	Intergenic	-44311	NR_131928	73144	Mm.38166	NM_001033153	ENSMUSG00000074415	Mir100hg	2610203C20Rik|3110039I08Rik|AI848448|D230004N17Rik|D3Mgi9	Mir100 Mirlet7a-2 Mir125b-1 cluster host gene	ncRNA
chr19	55898910	55899564	intron (NM_001142924, intron 1 of 11)	intron (NM_001142924, intron 1 of 11)	3916	NM_001142924	21416	Mm.139815	NM_009333	ENSMUSG00000024985	Tcf7l2	TCF4B|TCF4E|Tcf-4|Tcf4	transcription factor 7 like 2, T cell specific, HMG box	protein-coding
chr8	123963349	123964350	intron (NM_019552, intron 6 of 12)	L1MC2|LINE|L1	-14584	NM_172288	234865	Mm.267812	NM_172288	ENSMUSG00000039509	Nup133	mermaid	nucleoporin 133	protein-coding
chr19	57400485	57401140	Intergenic	Intergenic	39803	NM_145505	226252	Mm.358870	NM_145505	ENSMUSG00000033478	Fam160b1	AI450540|mKIAA1600	family with sequence similarity 160, member B1	protein-coding
chr18	66526462	66527222	Intergenic	MTE2b|LTR|ERVL-MaLR	22664	NR_040528	100503565	Mm.98256	NR_040528	ENSMUSG00000118376	Gm9926	-	predicted gene 9926	ncRNA
chr3	63998880	63999535	intron (NM_001033300, intron 11 of 15)	intron (NM_001033300, intron 11 of 15)	23064	NM_001033300	229363	Mm.331051	NM_001033300	ENSMUSG00000027823	Gmps	670032|AA591640|AI047208|Gm9479	guanine monophosphate synthetase	protein-coding
chr7	130027223	130028193	Intergenic	Intergenic	65543	NR_046077	100043150	Mm.334264	NR_046077	ENSMUSG00000108504	Gm4265	-	predicted gene 4265	ncRNA
chr17	80468426	80468806	intron (NM_009231, intron 1 of 21)	(CACAC)n|Simple_repeat|Simple_repeat	11837	NM_009231	20662	Mm.60975	NM_009231	ENSMUSG00000024241	Sos1	4430401P03Rik|9630010N06|AI449023	SOS Ras/Rac guanine nucleotide exchange factor 1	protein-coding
chr7	34328697	34328911	Intergenic	(TTCTC)n|Simple_repeat|Simple_repeat	-43195	NM_172741	233103	Mm.491097	NM_172741	ENSMUSG00000066571	4931406P16Rik	AA553327|mKIAA0355	RIKEN cDNA 4931406P16 gene	protein-coding
chr5	114049372	114050226	intron (NM_001359214, intron 7 of 16)	RMER15-int|LTR|ERVL	41581	NM_026805	68666	Mm.63584	NM_026805	ENSMUSG00000042078	Svop	1110030H18Rik|AI415691|msvop	SV2 related protein	protein-coding
chr18	86338471	86338876	Intergenic	Intergenic	-56279	NM_001360910	246317	Mm.329578	NM_144946	ENSMUSG00000050321	Neto1	AI851453|Btcl1|C130005O10Rik	neuropilin (NRP) and tolloid (TLL)-like 1	protein-coding
chr15	98785933	98786623	Intergenic	B1F|SINE|Alu	-3579	NM_021279	22408	Mm.1123	NM_021279	ENSMUSG00000022997	Wnt1	Int-1|Wnt-1|sw|swaying	wingless-type MMTV integration site family, member 1	protein-coding
chr16	34463543	34464317	intron (NM_177357, intron 1 of 59)	intron (NM_177357, intron 1 of 59)	50097	NM_177357	545156	Mm.82274	NM_177357	ENSMUSG00000061751	Kalrn	2210407G14Rik|AV235988|DUET|E530005C20Rik|Gm539|Hapip|TRAD	kalirin, RhoGEF kinase	protein-coding
chr3	149752923	149753624	Intergenic	MTEa|LTR|ERVL-MaLR	478536	NR_040591	381482	Mm.393866	NR_040591		Gm1653	-	predicted gene 1653	ncRNA
chr18	47479264	47479978	Intergenic	Intergenic	26953	NR_033453	77668	Mm.98433	NR_033453	ENSMUSG00000117602	9130209A04Rik	-	RIKEN cDNA 9130209A04 gene	ncRNA
chr8	37681430	37681699	intron (NM_145841, intron 3 of 7)	(TTCTC)n|Simple_repeat|Simple_repeat	570638	NR_029884	723860		NR_029884	ENSMUSG00000065457	Mir383	Mirn383|mir-383|mmu-mir-383	microRNA 383	ncRNA
chr1	168457798	168458001	Intergenic	(TTCTC)n|Simple_repeat|Simple_repeat	-25730	NM_008783	18514	Mm.43358	NM_008783	ENSMUSG00000052534	Pbx1	2310056B04Rik|D230003C07Rik|Pbx-1	pre B cell leukemia homeobox 1	protein-coding
chr19	28526447	28526677	intron (NM_175459, intron 4 of 10)	GA-rich|Low_complexity|Low_complexity	-151662	NR_045330	320176	Mm.406716	NR_045330	ENSMUSG00000097735	D930032P07Rik	-	RIKEN cDNA D930032P07 gene	ncRNA
chr2	168807354	168808295	Intergenic	Intergenic	-40623	NM_201396	99377	Mm.434054	NM_175303	ENSMUSG00000027547	Sall4	5730441M18Rik|AA407717|AL022809|AW536104|C330011P20Rik|C78083|C78563|Tex20	spalt like transcription factor 4	protein-coding
chr1	190432904	190433474	Intergenic	Intergenic	29541	NR_151624	433390	Mm.331295	NR_151624	ENSMUSG00000103644	Gm29678	-	predicted gene, 29678	ncRNA
chr7	26578533	26578774	Intergenic	(GAGAA)n|Simple_repeat|Simple_repeat	33425	NM_134231	171265	Mm.377217	NM_134231	ENSMUSG00000091924	Vmn1r185	V1re12	vomeronasal 1 receptor 185	protein-coding
chr17	25576656	25577296	Intergenic	Intergenic	-2198	NM_029624	76483	Mm.12787	NM_029624	ENSMUSG00000002279	Lmf1	2400010G15Rik|AW822050|Tmem112|cld	lipase maturation factor 1	protein-coding
chr13	59195716	59196624	Intergenic	MER31A|LTR|ERV1	348281	NM_001284221	67269	Mm.153008	NM_023328	ENSMUSG00000021557	Agtpbp1	1700020N17Rik|2310001G17Rik|2900054O13Rik|4930445M19Rik|5730402G09Rik|CCP1|Nna1|nmf243|pcd	ATP/GTP binding protein 1	protein-coding
chr12	27518422	27518630	Intergenic	(TTCTC)n|Simple_repeat|Simple_repeat	-175808	NM_009234	20666	Mm.41702	NM_009234	ENSMUSG00000063632	Sox11	1110038H03Rik|6230403H02Rik|AI836553|end1	SRY (sex determining region Y)-box 11	protein-coding
chr8	32877031	32877253	Intergenic	(GAGAA)n|Simple_repeat|Simple_repeat	72884	NM_001177589	100042715	Mm.291093	NM_001177589		Gm3985	-	predicted gene 3985	protein-coding
chr17	32211313	32211951	intron (NM_198094, intron 11 of 12)	intron (NM_198094, intron 11 of 12)	-22162	NM_001347341	71932	Mm.176240	NM_001033163	ENSMUSG00000037577	Ephx3	2310063B19Rik|Abhd9|EH3	epoxide hydrolase 3	protein-coding
chr11	114142435	114142980	Intergenic	Intergenic	-55551	NR_045930	73536	Mm.54275	NR_045930	ENSMUSG00000078600	1700092K14Rik	-	RIKEN cDNA 1700092K14 gene	ncRNA
chr18	66834732	66835249	Intergenic	Intergenic	25497	NM_016977	17202	Mm.229447	NM_016977	ENSMUSG00000047259	Mc4r	Mc4-r|Pkcp	melanocortin 4 receptor	protein-coding
chr9	103583786	103584546	intron (NM_001359465, intron 2 of 4)	intron (NM_001359465, intron 2 of 4)	27076	NR_040764	319215	Mm.425597	NR_040764	ENSMUSG00000099616	4932413F04Rik	-	RIKEN cDNA 4932413F04 gene	ncRNA
chr5	28099185	28099437	Intergenic	(CAGAC)n|Simple_repeat|Simple_repeat	27899	NM_153526	231070	Mm.30221	NM_153526	ENSMUSG00000045294	Insig1	1810013C12Rik|Insig-1	insulin induced gene 1	protein-coding
chr8	88097097	88097868	intron (NR_151771, intron 2 of 7)	intron (NR_151771, intron 2 of 7)	21125	NR_151771	100040328	Mm.56398	NR_151771		Gm2716	4933416k23	predicted gene 2716	ncRNA
chr3	58474346	58474980	Intergenic	L1_Mur3|LINE|L1	-51158	NM_001005509	229317	Mm.21617	NM_001005509	ENSMUSG00000027810	Eif2a	D030048D22|D3Ertd194e	eukaryotic translation initiation factor 2A	protein-coding
chr10	69910488	69910899	intron (NM_170689, intron 23 of 41)	intron (NM_170689, intron 23 of 41)	-14839	NM_170687	11735	Mm.235960	NM_009670	ENSMUSG00000069601	Ank3	2900054D09Rik|AI314020|Ank-3|AnkG|Ankyrin-3|Ankyrin-G	ankyrin 3, epithelial	protein-coding
chr9	35359719	35360670	Intergenic	Intergenic	79089	NR_040715	71133	Mm.158577	NR_040715	ENSMUSG00000111746	4933422A05Rik	-	RIKEN cDNA 4933422A05 gene	ncRNA
chr16	96956381	96956908	intron (NM_031174, intron 3 of 32)	intron (NM_031174, intron 3 of 32)	214091	NM_031174	13508	Mm.102437	NM_031174	ENSMUSG00000050272	Dscam	4932410A21Rik	DS cell adhesion molecule	protein-coding
chr7	16626522	16627207	intron (NR_136928, intron 2 of 2)	RLTR31B2|LTR|ERVK	-11871	NM_172739	232906	Mm.28646	NM_172739	ENSMUSG00000058230	Arhgap35	6430596G11Rik|AI841135|Grlf1|mKIAA1722|p190A|p190RhoGAP	Rho GTPase activating protein 35	protein-coding
chr1	188749522	188750084	intron (NM_021408, intron 43 of 70)	Lx7|LINE|L1	258037	NM_001359578	226823	Mm.209880	NM_172650	ENSMUSG00000026608	Kctd3	4930438A20Rik|9330185B06|E330032J19Rik|NY-REN-45	potassium channel tetramerisation domain containing 3	protein-coding
chr6	143520773	143521714	Intergenic	Intergenic	14265	NR_155418	75904	Mm.414916	NR_155418	ENSMUSG00000084971	4930579D09Rik	-	RIKEN cDNA 4930579D09 gene	ncRNA
chr2	9704401	9705184	Intergenic	MTEa|LTR|ERVL-MaLR	173808	NM_001355111	14462	Mm.313866	NM_008091	ENSMUSG00000015619	Gata3	Gata-3|jal	GATA binding protein 3	protein-coding
chr8	94484954	94485641	intron (NM_001033207, intron 11 of 48)	intron (NM_001033207, intron 11 of 48)	12534	NM_001033207	434341	Mm.334720	NM_001033207	ENSMUSG00000074151	Nlrc5	AI451557|AK220210|NOD27	NLR family, CARD domain containing 5	protein-coding
chrX	69926228	69926475	Intergenic	(GA)n|Simple_repeat|Simple_repeat	-18930	NM_029316	75509	Mm.233475	NM_029316	ENSMUSG00000059690	1700020N15Rik	-	RIKEN cDNA 1700020N15 gene	protein-coding
chr1	71746523	71747024	Intergenic	Intergenic	93438	NR_040308	100042814	Mm.405775	NR_040308	ENSMUSG00000073652	Apol7d	Gm15456	apolipoprotein L 7d	ncRNA
chr7	96848393	96849160	intron (NM_001310760, intron 22 of 32)	intron (NM_001310760, intron 22 of 32)	-47227	NR_045874	791381	Mm.402112	NR_045874	ENSMUSG00000053049	Gm15413	-	predicted gene 15413	ncRNA
chr12	104453108	104453793	Intergenic	Intergenic	19786	NM_010351	14836	Mm.129	NM_010351	ENSMUSG00000021095	Gsc	-	goosecoid homeobox	protein-coding
chr14	41964062	41964909	Intergenic	Intergenic	39536	NM_001358038	666214		NM_001358038		1700049E17Rik1	1700049E17Rik	RIKEN cDNA 1700049E17 gene, gene 1	protein-coding
chr17	84963295	84964561	intron (NM_011151, intron 1 of 5)	intron (NM_011151, intron 1 of 5)	-1097	NM_001159498	19043	Mm.249695	NM_011151	ENSMUSG00000061130	Ppm1b	PP2CB	protein phosphatase 1B, magnesium dependent, beta isoform	protein-coding
chr3	153333177	153334246	intron (NM_011372, intron 3 of 4)	intron (NM_011372, intron 3 of 4)	-35062	NR_126464	75489	Mm.443252	NR_126464	ENSMUSG00000105023	1700012D16Rik	-	RIKEN cDNA 1700012D16 gene	ncRNA
chr8	119000373	119000917	intron (NM_019707, intron 6 of 13)	intron (NM_019707, intron 6 of 13)	-343893	NM_024219	68196	Mm.358714	NM_024219	ENSMUSG00000031839	Hsbp1	0610007A03Rik|AA408769|Hsp25	heat shock factor binding protein 1	protein-coding
chr19	59436357	59436904	intron (NR_002863, intron 1 of 3)	L2a|LINE|L2	22005	NR_002863	329078	Mm.80382	NR_002863	ENSMUSG00000087095	Emx2os	-	Emx2 opposite strand/antisense transcript (non-protein coding)	ncRNA
chr2	57629430	57629762	Intergenic	(TTAGGG)n|Simple_repeat|Simple_repeat	-368559	NM_172855	241391	Mm.484118	NM_172855	ENSMUSG00000026828	Galnt5	4832424J23	polypeptide N-acetylgalactosaminyltransferase 5	protein-coding
chr7	70791284	70791674	Intergenic	Intergenic	-424733	NM_183261	11819	Mm.158143	NM_009697	ENSMUSG00000030551	Nr2f2	2700033K02Rik|9430015G03Rik|ARP-1|Aporp1|COUP-TF2|COUP-TFII|COUPTFB|EAR3|SVP40|Tcfcoup2	nuclear receptor subfamily 2, group F, member 2	protein-coding
chr12	70649774	70650620	intron (NR_037248, intron 4 of 4)	intron (NR_037248, intron 4 of 4)	-175317	NM_028127	319710	Mm.2962	NM_028127	ENSMUSG00000048285	Frmd6	2610019M19Rik|4930488L10Rik|AW212977|Willin	FERM domain containing 6	protein-coding
chr1	74175690	74176184	Intergenic	Intergenic	18694	NM_178241	227288	Mm.337035	NM_178241	ENSMUSG00000048480	Cxcr1	Il8ra	chemokine (C-X-C motif) receptor 1	protein-coding
chr10	122739702	122740437	intron (NM_176919, intron 1 of 8)	MTEa|LTR|ERVL-MaLR	60754	NR_106182	102466884		NR_106182	ENSMUSG00000099225	Mir8104	Gm27380|mmu-mir-8104	microRNA 8104	ncRNA
chr10	79599146	79599791	Intergenic	Intergenic	-12332	NM_011583	21830	Mm.89197	NM_011583	ENSMUSG00000020317	Theg	-	testicular haploid expressed gene	protein-coding
chr12	40161134	40161335	Intergenic	(GAGAA)n|Simple_repeat|Simple_repeat	-27006	NM_009132	20259	Mm.2416	NM_009132	ENSMUSG00000002565	Scin	AW545522|adseverin	scinderin	protein-coding
chr5	14921222	14921934	Intergenic	Lx2A1|LINE|L1	-6689	NM_198666	381714	Mm.368256	NM_198666	ENSMUSG00000033219	Gm9758	-	predicted gene 9758	protein-coding
chr1	38239472	38240162	intron (NM_001290814, intron 10 of 21)	intron (NM_001290814, intron 10 of 21)	107734	NR_151587	329123	Mm.207123	NR_151587	ENSMUSG00000102716	Gm5099	EG329123	predicted gene 5099	ncRNA
chr13	60748498	60749296	intron (NM_134062, intron 20 of 26)	intron (NM_134062, intron 20 of 26)	37467	NM_199148	218275	Mm.222427	NM_199148	ENSMUSG00000042243	BC051665	-	cDNA sequence BC051665	protein-coding
chr11	22143331	22144127	intron (NM_153078, intron 10 of 24)	intron (NM_153078, intron 10 of 24)	-142078	NM_011023	18423	Mm.129663	NM_011023	ENSMUSG00000005917	Otx1	A730044F23Rik|jv	orthodenticle homeobox 1	protein-coding
chr14	93958907	93959133	Intergenic	(GAGAA)n|Simple_repeat|Simple_repeat	-68341	NM_001346722	211712	Mm.37126	NM_001081377	ENSMUSG00000055421	Pcdh9	-	protocadherin 9	protein-coding
chr13	107488462	107489191	Intergenic	Intergenic	19004	NR_045084	105120	Mm.417700	NR_045083	ENSMUSG00000114780	AI197445	-	expressed sequence AI197445	ncRNA
chr8	25354631	25355400	Intergenic	Intergenic	-48745	NR_040352	74489	Mm.256468	NR_040352	ENSMUSG00000110140	5430421F17Rik	-	RIKEN cDNA 5430421F17 gene	ncRNA
chr5	14985248	14985603	Intergenic	Lx2A1|LINE|L1	-6526	NM_001281514	100503549	Mm.491086	NM_001281514	ENSMUSG00000072188	Gm10354	-	predicted gene 10354	protein-coding
chr14	78241494	78242482	Intergenic	Intergenic	-50510	NR_035499	100316715		NR_035499	ENSMUSG00000087932	Mir1971	mmu-mir-1971	microRNA 1971	ncRNA
chr8	95056800	95057473	intron (NM_001042715, intron 3 of 17)	intron (NM_001042715, intron 3 of 17)	2033	NM_001042715	330830	Mm.277112	NM_001042715	ENSMUSG00000031786	Drc7	Ccdc135|Gm770|SRG-L|SRG-S	dynein regulatory complex subunit 7	protein-coding
chr3	142882005	142883040	promoter-TSS (NR_152127)	promoter-TSS (NR_152127)	27	NR_152127	320229	Mm.187582	NR_152127		9530052C20Rik	-	RIKEN cDNA 9530052C20 gene	ncRNA
chr1	38404215	38404809	intron (NM_001290814, intron 5 of 21)	intron (NM_001290814, intron 5 of 21)	222732	NM_001290814	16764	Mm.336679	NM_010678	ENSMUSG00000037138	Aff3	3222402O04Rik|A730046J16|LAF-4|Laf4	AF4/FMR2 family, member 3	protein-coding
chr14	19418575	19418978	Intergenic	GSAT_MM|Satellite|Satellite	183811	NM_001024706	432825	Mm.327147	NM_001024706	ENSMUSG00000095024	Gm5458	EG432825	predicted gene 5458	protein-coding
chr7	100246735	100247176	intron (NM_027629, intron 1 of 13)	B1_Mur1|SINE|Alu	-17589	NR_033563	14777	Mm.57225	NR_033563		Gpx2-ps1	AU041318	glutathione peroxidase 2, pseudogene 1	pseudo
chr5	101252967	101253475	Intergenic	Lx6|LINE|L1	406992	NM_172715	231510	Mm.271911	NM_172715	ENSMUSG00000029314	Gpat3	1-AGPAT|1-AGPAT 9|4933407I02Rik|4933408F15|A230097K15Rik|Agpat9|GPAT-3|mGPAT3	glycerol-3-phosphate acyltransferase 3	protein-coding
chr13	57190866	57191460	Intergenic	Intergenic	-295374	NM_001302372	26946	Mm.62409	NM_012035	ENSMUSG00000021541	Trpc7	TRP7|Trrp8	transient receptor potential cation channel, subfamily C, member 7	protein-coding
chr5	131545385	131546251	intron (NM_001363480, intron 5 of 19)	intron (NM_001363480, intron 5 of 19)	-131100	NR_152164	545809	Mm.357553	NR_152164	ENSMUSG00000105387	Gm29681	Gm42590	predicted gene, 29681	ncRNA
chr1	138784994	138785184	Intergenic	(TTCTC)n|Simple_repeat|Simple_repeat	57355	NM_001025565	16876	Mm.250732	NM_010714	ENSMUSG00000019230	Lhx9	3110009O07Rik|BB104635|LH2B	LIM homeobox protein 9	protein-coding
chr17	65656570	65657256	intron (NM_133685, intron 6 of 6)	intron (NM_133685, intron 6 of 6)	-14709	NM_001146002	213272	Mm.255732	NM_153519	ENSMUSG00000050612	Txndc2	AU021712|Sptrx-1|Sptrx1|Trx4	thioredoxin domain containing 2 (spermatozoa)	protein-coding
chr2	67551953	67552358	Intergenic	Intergenic	106153	NM_001024618	241431	Mm.261043	NM_001024618	ENSMUSG00000027022	Xirp2	2310003D02Rik|2310008C07Rik|A530024P18Rik|AI452089|Cmya3|Gm352|Xin2	xin actin-binding repeat containing 2	protein-coding
chr17	25313984	25314972	Intergenic	B1_Mur2|SINE|Alu	-4176	NM_053260	114662	Mm.207082	NM_053260	ENSMUSG00000034039	Prss29	D19363|Isp2|mISP-2	protease, serine 29	protein-coding
chr1	180397516	180398152	intron (NM_001081175, intron 2 of 7)	intron (NM_001081175, intron 2 of 7)	-67285	NR_003623	277333	Mm.389223	NM_199472		Gm5069	EG277333	glyceraldehyde-3-phosphate dehydrogenase pseudogene	pseudo
chr12	58222464	58222975	Intergenic	Intergenic	10915	NM_009216	20605	Mm.278336	NM_009216	ENSMUSG00000035431	Sstr1	SRIF-2|SS-1-R|SS1-R|SS1R|Smstr-1|Smstr1|sst1	somatostatin receptor 1	protein-coding
chr7	80987963	80988792	Intergenic	Intergenic	-5307	NM_178707	233410	Mm.29525	NM_178707	ENSMUSG00000005621	Zfp592	A730014M16Rik|Znf592	zinc finger protein 592	protein-coding
chr13	44156781	44157671	Intergenic	Intergenic	36059	NR_045285	328235	Mm.188356	NR_045285	ENSMUSG00000089815	Gm5083	A730030A06	predicted gene 5083	ncRNA
chr10	118749994	118750793	Intergenic	ORR1E|LTR|ERVL-MaLR	-34667	NR_155867	102636202	Mm.407006	NR_155867		Gm33337	-	predicted gene, 33337	ncRNA
chr4	133547419	133547611	Intergenic	(GAGAA)n|Simple_repeat|Simple_repeat	-1488	NM_010948	18221	Mm.69	NM_010948	ENSMUSG00000028851	Nudc	SIG-92|Silg92	nudC nuclear distribution protein	protein-coding
chr18	19982290	19982814	intron (NM_007882, intron 7 of 15)	MTEb|LTR|ERVL-MaLR	19545	NM_001291809	13507	Mm.89935	NM_007882	ENSMUSG00000059898	Dsc3	5430426I24Rik	desmocollin 3	protein-coding
chr4	131275925	131276683	Intergenic	Intergenic	-265830	NR_130167	77835	Mm.348412	NR_130167	ENSMUSG00000086262	A930031H19Rik	A930004I12Rik	RIKEN cDNA A930031H19 gene	ncRNA
chr18	45860069	45860267	intron (NR_040342, intron 2 of 3)	(GAGAA)n|Simple_repeat|Simple_repeat	185092	NR_040342	107003	Mm.395148	NR_040342		A330093E20Rik	AU043608	RIKEN cDNA A330093E20 gene	ncRNA
chr6	118462811	118463520	3' UTR (NM_011763, exon 6 of 6)	3' UTR (NM_011763, exon 6 of 6)	-7659	NM_001361900	72720	Mm.212572	NM_028335	ENSMUSG00000030145	Zfp248	2810037F07Rik|E130106N01Rik	zinc finger protein 248	protein-coding
chr8	33826625	33827246	intron (NM_001042675, intron 5 of 6)	intron (NM_001042675, intron 5 of 6)	-79165	NM_001206849	72632	Mm.443483	NM_001206849	ENSMUSG00000094500	Smim18	2700090O03Rik|AI835723	small integral membrane protein 18	protein-coding
chr8	126478522	126479179	Intergenic	Intergenic	-3785	NM_001159907	212728	Mm.482479	NM_001159907	ENSMUSG00000090290	Tarbp1	Gm17296|Gm179	TAR RNA binding protein 1	protein-coding
chr12	69941506	69941930	intron (NM_178628, intron 7 of 14)	intron (NM_178628, intron 7 of 14)	-21691	NR_036607	100040999	Mm.394588	NR_036607	ENSMUSG00000079076	Gm3086	-	RuvB-like protein 1 pseudogene	pseudo
chr4	32483816	32484662	intron (NM_001109661, intron 1 of 4)	intron (NM_001109661, intron 1 of 4)	66804	NM_001109661	12014	Mm.491223	NM_007521	ENSMUSG00000040270	Bach2	E030004N02Rik	BTB and CNC homology, basic leucine zipper transcription factor 2	protein-coding
chr3	138316031	138316540	intron (NM_026945, intron 1 of 8)	intron (NM_026945, intron 1 of 8)	2999	NM_026945	69117	Mm.46265	NM_026945	ENSMUSG00000053054	Adh6a	1810009C16Rik|Adh5a	alcohol dehydrogenase 6A (class V)	protein-coding
chr11	105439497	105440663	intron (NM_001039242, intron 3 of 5)	intron (NM_001039242, intron 3 of 5)	16655	NM_172568	632687	Mm.121570	NM_172568	ENSMUSG00000078627	2025-03-10	4933417C16Rik|AV039223|Rnf190	membrane-associated ring finger (C3HC4) 10	protein-coding
chr3	123111319	123112078	intron (NM_080451, intron 4 of 4)	intron (NM_080451, intron 4 of 4)	-76711	NM_001355462	59006	Mm.141157	NM_021503	ENSMUSG00000028116	Myoz2	1110012I24Rik|Fatz-2|Myozl2	myozenin 2	protein-coding
chr12	15976737	15977332	Intergenic	(CAATA)n|Simple_repeat|Simple_repeat	-160249	NM_144551	217410	Mm.491136	NM_144551	ENSMUSG00000020601	Trib2	AW319517|TRB-2|TRB2	tribbles pseudokinase 2	protein-coding
chr3	69606759	69608166	Intergenic	Intergenic	-8502	NM_020026	26879	Mm.153710	NM_020026	ENSMUSG00000043300	B3galnt1	B3galt3|b3GT3	UDP-GalNAc:betaGlcNAc beta 1,3-galactosaminyltransferase, polypeptide 1	protein-coding
chr15	87580645	87581162	intron (NM_001252310, intron 1 of 3)	intron (NM_001252310, intron 1 of 3)	36604	NM_001252310	106014	Mm.244319	NM_134096	ENSMUSG00000054863	Tafa5	Fam19a5|Tafa-5|Tara-5	TAFA chemokine like family member 5	protein-coding
chr10	123138111	123138662	intron (NM_001301628, intron 7 of 20)	intron (NM_001301628, intron 7 of 20)	58633	NM_027604	14479	Mm.244209	NM_027604	ENSMUSG00000020124	Usp15	4921514G19Rik|AI327321|E430033I05Rik|Gcap18	ubiquitin specific peptidase 15	protein-coding
chr12	84269608	84270723	Intergenic	Intergenic	-15131	NM_029880	77219	Mm.246127	NM_029880	ENSMUSG00000072946	Ptgr2	1810016I24Rik|9130222H03Rik|9630002F03Rik|AI838763|B830026H24Rik|PGR-2|PRG-2|Zadh1	prostaglandin reductase 2	protein-coding
chr17	31662211	31663169	Intergenic	Intergenic	-3926	NM_001357907	108121	Mm.379289	NM_024187	ENSMUSG00000061613	U2af1	2010107D16Rik	U2 small nuclear ribonucleoprotein auxiliary factor (U2AF) 1	protein-coding
chr17	5011562	5011855	intron (NM_001085355, intron 1 of 19)	intron (NM_001085355, intron 1 of 19)	16634	NM_001085355	239985	Mm.133401	NM_001085355	ENSMUSG00000069729	Arid1b	8030481M12|9330189K18Rik|AI836955|Ardi1b|B230217J03Rik|BAF250B|mKIAA1235	AT rich interactive domain 1B (SWI-like)	protein-coding
chr4	136580259	136580452	intron (NM_001356567, intron 2 of 19)	(GAGAA)n|Simple_repeat|Simple_repeat	22368	NM_001356567	99982	Mm.28540	NM_133872	ENSMUSG00000036940	Kdm1a	1810043O07Rik|AA408884|Aof2|D4Ertd478e|Kdm1|Lsd1|mKIAA0601	lysine (K)-specific demethylase 1A	protein-coding
chr5	60042819	60043097	Intergenic	Intergenic	-56956	NR_040683	71057	Mm.50817	NR_040682	ENSMUSG00000106013	4933402J10Rik	-	RIKEN cDNA 4933402J10 gene	ncRNA
chr3	58721193	58722051	intron (NR_045167, intron 2 of 7)	intron (NR_045167, intron 2 of 7)	29033	NR_045167	71301	Mm.254475	NR_045167	ENSMUSG00000097725	4930593A02Rik	4933440I01Rik	RIKEN cDNA 4930593A02 gene	ncRNA
chr5	73253549	73254166	intron (NM_028194, intron 1 of 62)	tRNA-Ala-GCY_|tRNA|tRNA	2761	NM_028194	72313	Mm.260594	NM_028194	ENSMUSG00000070733	Fryl	2010313D22Rik|2310004H21Rik|2510002A14Rik|9030227G01Rik|mKIAA0826	FRY like transcription coactivator	protein-coding
chr1	161303006	161303544	Intergenic	Intergenic	-52065	NR_130150	11758	Mm.186185	NM_007453	ENSMUSG00000026701	Prdx6	1-Cys Prx|1-cysPrx|9430088D19Rik|AA690119|Aop2|Brp-12|CP-3|GPx|Ltw-4|Ltw4|Lvtw-4|NSGPx|ORF06|Prdx5|aiPLA2	peroxiredoxin 6	protein-coding
chr2	28644640	28645208	intron (NM_001289576, intron 1 of 22)	intron (NM_001289576, intron 1 of 22)	3691	NM_022887	64930	Mm.224354	NM_022887	ENSMUSG00000026812	Tsc1	-	TSC complex subunit 1	protein-coding
chr2	171163254	171164064	Intergenic	Intergenic	431852	NM_029761	76829	Mm.41633	NM_029761	ENSMUSG00000027560	Dok5	2700055C10Rik	docking protein 5	protein-coding
chr11	109309873	109310661	Intergenic	Intergenic	-12086	NM_011268	19739	Mm.38548	NM_011268	ENSMUSG00000020599	Rgs9	RGS9-1|Rgs9-2	regulator of G-protein signaling 9	protein-coding
chr13	53903666	53904671	Intergenic	Intergenic	11580	NR_152124	78550	Mm.160095	NR_152124		E130119H09Rik	-	RIKEN cDNA E130119H09 gene	ncRNA
chr10	115092563	115093362	intron (NM_173391, intron 8 of 10)	intron (NM_173391, intron 8 of 10)	92060	NM_173391	216343	Mm.31597	NM_173391	ENSMUSG00000006764	Tph2	AU043594|Ntph	tryptophan hydroxylase 2	protein-coding
chr1	40850397	40850917	intron (NM_001081198, intron 4 of 4)	intron (NM_001081198, intron 4 of 4)	45056	NM_001081198	381339	Mm.334678	NM_001081198	ENSMUSG00000079588	Tmem182	2310079P10Rik|AI414494	transmembrane protein 182	protein-coding
chr4	140314640	140315255	Intergenic	Intergenic	-65520	NR_151508	329970	Mm.404705	NR_151508		Gm13016	A830025M08	predicted gene 13016	ncRNA
chr8	95878587	95879454	intron (NM_010325, intron 1 of 9)	RMER4B|LTR|ERVK	9381	NM_010325	14719	Mm.230169	NM_010325	ENSMUSG00000031672	Got2	AL022787|FABP-pm|Got-2|Kyat4|mAspAT	glutamatic-oxaloacetic transaminase 2, mitochondrial	protein-coding
chr14	73087195	73087948	Intergenic	Intergenic	-38457	NM_001162412	70086	Mm.158324	NM_133720	ENSMUSG00000033470	Cysltr2	2300001H05Rik|CYSLT2R|Cltr2|Cyslt2	cysteinyl leukotriene receptor 2	protein-coding
chr5	102667592	102668243	intron (NM_029270, intron 3 of 9)	intron (NM_029270, intron 3 of 9)	-100893	NM_001286468	231532	Mm.440191	NM_029270	ENSMUSG00000057315	Arhgap24	0610025G21Rik	Rho GTPase activating protein 24	protein-coding
chr14	93577364	93577572	intron (NM_001081377, intron 2 of 4)	(TTCTC)n|Simple_repeat|Simple_repeat	313201	NM_001271800	211712	Mm.37126	NM_001081377	ENSMUSG00000055421	Pcdh9	-	protocadherin 9	protein-coding
chr2	12283825	12284066	intron (NM_001001309, intron 2 of 29)	CT-rich|Low_complexity|Low_complexity	-17301	NR_040353	338535	Mm.483275	NR_040353	ENSMUSG00000086843	E030013I19Rik	-	RIKEN cDNA E030013I19 gene	ncRNA
chr19	46980850	46981532	intron (NM_001164363, intron 1 of 17)	intron (NM_001164363, intron 1 of 17)	-11624	NM_001164365	76952	Mm.40965	NM_029810	ENSMUSG00000025041	Nt5c2	2010002I23Rik|CnII|Gm9751|Gmp|Nt5b|Pnt5|cN-II	5'-nucleotidase, cytosolic II	protein-coding
chr5	74903245	74904156	Intergenic	Intergenic	-45494	NR_045866	619945	Mm.359372	NM_001037908	ENSMUSG00000072874	Gm6116	EG619945	predicted gene 6116	ncRNA
chr11	89608395	89609265	intron (NM_001327810, intron 2 of 19)	intron (NM_001327810, intron 2 of 19)	88106	NM_001327810	382543	Mm.60997	NM_172534	ENSMUSG00000047773	Ankfn1	4932411E22Rik|Gm1175|nmf9	ankyrin-repeat and fibronectin type III domain containing 1	protein-coding
chr8	114354800	114355486	intron (NM_173016, intron 7 of 8)	MTE2b|LTR|ERVL-MaLR	-3665	NR_045831	71122	Mm.437539	NR_045831		4933408N05Rik	-	RIKEN cDNA 4933408N05 gene	ncRNA
chr8	46769086	46770032	intron (NM_008391, intron 1 of 8)	ORR1E|LTR|ERVL-MaLR	29814	NM_008391	16363	Mm.1149	NM_008391	ENSMUSG00000031627	Irf2	9830146E22Rik|AI646973|Irf-2	interferon regulatory factor 2	protein-coding
chr17	9998654	9999534	Intergenic	Intergenic	-223228	NR_045433	71092	Mm.243827	NR_045433	ENSMUSG00000117264	4930452A19Rik	4933424P20Rik	RIKEN cDNA 4930452A19 gene	ncRNA
chr8	18566662	18567532	Intergenic	MTEa|LTR|ERVL-MaLR	-28034	NM_173189	244329	Mm.235296	NM_173189	ENSMUSG00000039842	Mcph1	5430437K10Rik|BRIT1|D030046N04Rik|MCT|Tg(HLA-A2.1)1Enge	microcephaly, primary autosomal recessive 1	protein-coding
chr1	191009637	191010505	intron (NM_001081259, intron 7 of 9)	RLTR13D6|LTR|ERVK	-15280	NR_027298	100125339	Mm.472263	NR_027298	ENSMUSG00000097845	A230020J21Rik	-	RIKEN cDNA A230020J21 gene	ncRNA
chr5	15039430	15040281	Intergenic	Lx2A1|LINE|L1	-6848	NM_182957	66773	Mm.368256	NM_182957	ENSMUSG00000091897	Gm17019	-	predicted gene 17019	protein-coding
chr8	25309621	25310161	Intergenic	Intergenic	-3621	NR_040352	74489	Mm.256468	NR_040352	ENSMUSG00000110140	5430421F17Rik	-	RIKEN cDNA 5430421F17 gene	ncRNA
chr9	103234838	103235569	Intergenic	L1M5|LINE|L1	-4917	NM_133977	22041	Mm.37214	NM_133977	ENSMUSG00000032554	Trf	AI266983|Cd176|HP|Tf|Tfn|hpx	transferrin	protein-coding
chr18	74762835	74763810	intron (NM_201600, intron 38 of 38)	intron (NM_201600, intron 38 of 38)	15133	NR_028560	100217466		NR_028560		Scarna17	MBII-119	small Cajal body-specific RNA 17	ncRNA
chr15	57954946	57955497	intron (NM_001356310, intron 14 of 19)	intron (NM_001356310, intron 14 of 19)	-30682	NM_173862	239463	Mm.221241	NM_173862	ENSMUSG00000051225	Fam83a	-	family with sequence similarity 83, member A	protein-coding
chr5	119311146	119311776	Intergenic	Intergenic	-111443	NR_046033	665194	Mm.491047	NR_046033	ENSMUSG00000107334	Gm7538	EG665194	predicted gene 7538	ncRNA
chr5	93063447	93064247	Intergenic	Intergenic	-18825	NM_175270	78088	Mm.245085	NM_175270	ENSMUSG00000045314	Sowahb	5730467H21Rik|Ankrd56	sosondowah ankyrin repeat domain family member B	protein-coding
chr16	29955813	29956596	Intergenic	Intergenic	22920	NR_037689	328657	Mm.425982	NM_001033403	ENSMUSG00000075286	Gm1968	-	predicted gene 1968	ncRNA
chr17	44589889	44590911	intron (NR_073425, intron 5 of 5)	intron (NR_073425, intron 5 of 5)	145776	NM_001271631	12393	Mm.391013	NM_009820	ENSMUSG00000039153	Runx2	AML3|Cbf|Cbfa-1|Cbfa1|LS3|Osf2|PEBP2aA|Pebp2a1|Pebpa2a	runt related transcription factor 2	protein-coding
chr3	159779101	159779341	Intergenic	(GAGAA)n|Simple_repeat|Simple_repeat	-60429	NM_026582	68151	Mm.6766	NM_026582	ENSMUSG00000028173	Wls	5031439A09Rik|AI173978|AI987742|EVI|Gpr177	wntless WNT ligand secretion mediator	protein-coding
chr19	58780332	58780785	Intergenic	Intergenic	12734	NM_001368688	67507	Mm.27027	NM_026208	ENSMUSG00000026931	1700019N19Rik	-	RIKEN cDNA 1700019N19 gene	protein-coding
chr5	102704724	102705744	intron (NM_029270, intron 3 of 9)	ORR1F|LTR|ERVL-MaLR	-63576	NM_001286468	231532	Mm.440191	NM_029270	ENSMUSG00000057315	Arhgap24	0610025G21Rik	Rho GTPase activating protein 24	protein-coding
chr2	138121545	138121768	Intergenic	(GAGAA)n|Simple_repeat|Simple_repeat	-134928	NM_001025431	228662	Mm.153405	NM_145534	ENSMUSG00000062098	Btbd3	mKIAA0952	BTB (POZ) domain containing 3	protein-coding
chr2	171585405	171586078	Intergenic	MTEa|LTR|ERVL-MaLR	377058	NR_040509	75655	Mm.396203	NR_040509	ENSMUSG00000086823	1700028P15Rik	-	RIKEN cDNA 1700028P15 gene	ncRNA
chr5	106120364	106120919	Intergenic	Intergenic	-200699	NR_136913	102635633	Mm.383511	NR_136913	ENSMUSG00000105508	Gm32921	-	predicted gene, 32921	ncRNA
chr1	131693469	131694363	intron (NM_145509, intron 1 of 5)	intron (NM_145509, intron 1 of 5)	5221	NM_001311096	226421	Mm.44508	NM_145509	ENSMUSG00000052688	Rab7b	5430435G22Rik	RAB7B, member RAS oncogene family	protein-coding
chr19	54365253	54365952	Intergenic	Intergenic	320343	NM_007417	11551	Mm.235195	NM_007417	ENSMUSG00000033717	Adra2a	AW122659|Adra-2|Adra-2a|alpha(2A)AR|alpha2-C10|alpha2A|alpha2A-AR	adrenergic receptor, alpha 2a	protein-coding
chr16	96783324	96783997	intron (NM_031174, intron 10 of 32)	intron (NM_031174, intron 10 of 32)	316054	NM_008791	18546	Mm.5023	NM_008791	ENSMUSG00000090223	Pcp4	P16Rimb19|Pcp-4|Pep19	Purkinje cell protein 4	protein-coding
chr13	73503120	73503794	intron (NM_001368681, intron 7 of 12)	intron (NM_001368681, intron 7 of 12)	-33290	NM_010020	13162	Mm.41993	NM_010020	ENSMUSG00000021609	Slc6a3	DAT|Dat1	solute carrier family 6 (neurotransmitter transporter, dopamine), member 3	protein-coding
chr4	142568840	142569614	Intergenic	MTEa|LTR|ERVL-MaLR	-329826	NM_001109685	71529	Mm.255986	NM_144531	ENSMUSG00000040606	Kazn	2310007B04Rik|9030409G11Rik|AI256607|AI666764|AW061099|Kaz|Kazrin	kazrin, periplakin interacting protein	protein-coding
chr15	80401272	80401844	Intergenic	Intergenic	37045	NR_155275	102633578	Mm.397484	NR_155274	ENSMUSG00000115888	Gm31369	-	predicted gene, 31369	ncRNA
chr11	22838015	22838671	intron (NM_001169114, intron 1 of 1)	intron (NM_001169114, intron 1 of 1)	21392	NM_016888	53625	Mm.395495	NM_016888	ENSMUSG00000051650	B3gnt2	AA408337|AA409404|AW260308|B3Galt6|B3gnt1|BGnT-1|BGnT-2|BGnT1|BGnT2|Beta3gnt	UDP-GlcNAc:betaGal beta-1,3-N-acetylglucosaminyltransferase 2	protein-coding
chr19	59735888	59736758	Intergenic	Intergenic	207041	NM_001033172	74998	Mm.24167	NM_001033172	ENSMUSG00000040022	Rab11fip2	4930470G04Rik|A830046J09Rik|AW558126|Nrip11	RAB11 family interacting protein 2 (class I)	protein-coding
chr11	110526551	110527006	Intergenic	MTEa|LTR|ERVL-MaLR	47438	NM_001356346	26399	Mm.14487	NM_011943	ENSMUSG00000020623	Map2k6	MAPKK 6|MAPKK6|MEK6|MKK6|Prkmk6|SAPKK3	mitogen-activated protein kinase kinase 6	protein-coding
chr14	53976625	53976883	Intergenic	(GAGAA)n|Simple_repeat|Simple_repeat	277175	NM_010015	13135	Mm.319038	NM_010015	ENSMUSG00000022174	Dad1	AI323713	defender against cell death 1	protein-coding
chr8	120844662	120845341	Intergenic	MTC|LTR|ERVL-MaLR	106362	NM_001301811	15900	Mm.334861	NM_008320	ENSMUSG00000041515	Irf8	AI893568|ICSBP|IRF-8|Icsbp1|Myls	interferon regulatory factor 8	protein-coding
chr15	101520925	101521708	Intergenic	Intergenic	11504	NM_008474	16680	Mm.25292	NM_008474	ENSMUSG00000044294	Krt84	AV235125|HRb-1|Krt2-16|Krt2-3	keratin 84	protein-coding
chr12	116957574	116958201	intron (NM_011215, intron 11 of 22)	intron (NM_011215, intron 11 of 22)	193382	NR_033538	100038689	Mm.445351	NR_033538	ENSMUSG00000099907	Gm10421	-	predicted gene 10421	ncRNA
chr19	58011417	58012217	intron (NM_181415, intron 27 of 28)	intron (NM_181415, intron 27 of 28)	-39350	NR_049196	100885835		NR_049196	ENSMUSG00000093757	Mir5623	Gm26068|mir-5623|mmu-mir-5623	microRNA 5623	ncRNA
chr1	192103156	192104034	intron (NM_001290279, intron 9 of 9)	intron (NM_001290279, intron 9 of 9)	-10996	NM_011633	22033	Mm.380491	NM_011633		Traf5	-	TNF receptor-associated factor 5	protein-coding
chr13	54188462	54189092	Intergenic	Intergenic	-3352	NM_001010973	15466	Mm.57243	NM_008286	ENSMUSG00000034987	Hrh2	H2R|HH2R	histamine receptor H2	protein-coding
chr12	36021360	36022516	intron (NM_025359, intron 3 of 5)	intron (NM_025359, intron 3 of 5)	20540	NM_025359	66109	Mm.254663	NM_025359	ENSMUSG00000020577	Tspan13	1100001I23Rik|NET-6|Tm4sf13	tetraspanin 13	protein-coding
chr16	95037058	95037651	Intergenic	MTE-int|LTR|ERVL-MaLR	-39658	NM_010606	16522	Mm.328720	NM_010606	ENSMUSG00000043301	Kcnj6	BIR1|GIRK2|KATP2|KCNJ7|Kir3.2|weaver|wv	potassium inwardly-rectifying channel, subfamily J, member 6	protein-coding
chr7	101309715	101310958	Intergenic	(CA)n|Simple_repeat|Simple_repeat	-6750	NM_001360460	56018	Mm.28896	NM_019990	ENSMUSG00000030688	Stard10	AV048538|CGI-52|NY-C0-28|PC-TP2|PCTP2|Pctpl|Sdccag28|SdccagG28|TISP-81	START domain containing 10	protein-coding
chr18	81033114	81033745	Intergenic	Intergenic	-46408	NM_178280	20689	Mm.215917	NM_178280	ENSMUSG00000024565	Sall3	B130022O04Rik|Msal|Msal-1|Sal|Salt|Spalt	spalt like transcription factor 3	protein-coding
chr5	103858348	103859325	Intergenic	Intergenic	52423	NM_178741	246293	Mm.179871	NM_178741	ENSMUSG00000029312	Klhl8	2310001P09Rik|D5Ertd431e	kelch-like 8	protein-coding
chr6	55182439	55183126	Intergenic	Lx8|LINE|L1	-7792	NM_009349	21743	Mm.299	NM_009349	ENSMUSG00000003477	Inmt	Temt	indolethylamine N-methyltransferase	protein-coding
chr9	123461862	123462190	3' UTR (NM_001348168, exon 22 of 22)	3' UTR (NM_001348168, exon 22 of 22)	-16675	NM_013860	29806	Mm.10987	NM_013860	ENSMUSG00000025239	Limd1	AW822033|D9Ertd192e	LIM domains containing 1	protein-coding
chr8	3284651	3285248	Intergenic	Intergenic	-5332	NM_001330056	16337	Mm.268003	NM_010568	ENSMUSG00000005534	Insr	4932439J01Rik|CD220|D630014A15Rik|IR|IR-A|IR-B	insulin receptor	protein-coding
chr1	187946474	187946991	intron (NM_001357534, intron 2 of 7)	intron (NM_001357534, intron 2 of 7)	-51095	NM_001357536	26381	Mm.89989	NM_011935	ENSMUSG00000026610	Esrrg	ERR3|Errg|NR3B3|mKIAA0832	estrogen-related receptor gamma	protein-coding
chr2	110206755	110207595	Intergenic	Intergenic	98550	NM_130452	170442	Mm.27335	NM_130452	ENSMUSG00000041660	Bbox1	AI874739	butyrobetaine (gamma), 2-oxoglutarate dioxygenase 1 (gamma-butyrobetaine hydroxylase)	protein-coding
chr13	10515703	10516172	Intergenic	Intergenic	-155134	NM_033269	12671	Mm.342315	NM_033269	ENSMUSG00000046159	Chrm3	Chrm-3|M3|M3R	cholinergic receptor, muscarinic 3, cardiac	protein-coding
chr4	147793109	147793295	intron (NM_001127189, intron 3 of 5)	(GAGAA)n|Simple_repeat|Simple_repeat	16586	NM_001127189	100041677	Mm.327194	NM_001127189	ENSMUSG00000078495	Zfp984	Gm13157	zinc finger protein 984	protein-coding
chr3	104101328	104102345	intron (NM_001159354, intron 2 of 20)	LTR41B|LTR|ERVL	118570	NM_001159354	99470	Mm.264849	NM_133853	ENSMUSG00000052539	Magi3	4732496O19Rik|6530407C02Rik|AA407180|AI120132|mKIAA1634	membrane associated guanylate kinase, WW and PDZ domain containing 3	protein-coding
chr2	58984968	58985766	intron (NM_001001178, intron 8 of 14)	intron (NM_001001178, intron 8 of 14)	175316	NM_001001178	227933	Mm.330234	NM_177650	ENSMUSG00000036641	Ccdc148	5830402J09|Gm38473	coiled-coil domain containing 148	protein-coding
chr2	34755066	34756058	promoter-TSS (NM_001356441)	promoter-TSS (NM_001356441)	-330	NM_025709	66691	Mm.156452	NM_025709	ENSMUSG00000026867	Gapvd1	2010005B09Rik|4432404J10Rik|AW108497|Gapex-5|RAP6|RME-6|mKIAA1521	GTPase activating protein and VPS9 domains 1	protein-coding
chr16	77743216	77743996	Intergenic	Intergenic	97333	NR_029540	723952		NR_029540	ENSMUSG00000065472	Mir125b-2	Mirn125b-2|mir-125b-2	microRNA 125b-2	ncRNA
chr1	153310972	153311412	intron (NM_010683, intron 1 of 27)	intron (NM_010683, intron 1 of 27)	21594	NM_010683	226519	Mm.1249	NM_010683	ENSMUSG00000026478	Lamc1	Lamb2	laminin, gamma 1	protein-coding
chr4	143187892	143188329	intron (NM_001081355, intron 2 of 9)	intron (NM_001081355, intron 2 of 9)	24599	NM_001081355	110593	Mm.332020	NM_001081355	ENSMUSG00000057637	Prdm2	4833427P12Rik|E330024L24Rik|Gm1033|Gm19732|KMT8|Riz|Riz1|Znfpr1c1	PR domain containing 2, with ZNF domain	protein-coding
chr13	49169169	49170080	Intergenic	Intergenic	-17905	NM_013610	18081	Mm.18503	NM_013610	ENSMUSG00000037966	Ninj1	AU024536	ninjurin 1	protein-coding
chr4	89264680	89264923	Intergenic	(CAGGG)n|Simple_repeat|Simple_repeat	17391	NM_001040654	12578	Mm.4733	NM_009877	ENSMUSG00000044303	Cdkn2a	ARF-INK4a|Arf|INK4a-ARF|Ink4a/Arf|MTS1|Pctr1|p16|p16(INK4a)|p16INK4a|p19<ARF>|p19ARF	cyclin dependent kinase inhibitor 2A	protein-coding
chr5	142413794	142414505	intron (NM_199068, intron 1 of 8)	intron (NM_199068, intron 1 of 8)	12652	NM_199068	17425	Mm.24214	NM_010812	ENSMUSG00000056493	Foxk1	A630048H08Rik|AI463295|Gm10868|Mnf	forkhead box K1	protein-coding
chr9	58161310	58161553	Intergenic	(GGAGA)n|Simple_repeat|Simple_repeat	-2210	NM_012043	26968	Mm.367887	NM_012043	ENSMUSG00000037206	Islr	AW553146|Meflin	immunoglobulin superfamily containing leucine-rich repeat	protein-coding
chr6	124255038	124255483	Intergenic	MERVL_2A-int|LTR|ERVL	-23476	NM_001104642	232367	Mm.469872	NM_001104642	ENSMUSG00000072778	Vmn2r27	EG232367	vomeronasal 2, receptor27	protein-coding
chr9	21290925	21291716	promoter-TSS (NM_009878)	promoter-TSS (NM_009878)	-111	NM_009878	12581	Mm.29020	NM_009878	ENSMUSG00000096472	Cdkn2d	INK4d|p19|p19INK4d	cyclin dependent kinase inhibitor 2D	protein-coding
chr13	52923647	52924351	intron (NM_016709, intron 1 of 9)	L1MC|LINE|L1	5678	NM_016709	11992	Mm.252034	NM_016709	ENSMUSG00000021460	Auh	C77140|W91705	AU RNA binding protein/enoyl-coenzyme A hydratase	protein-coding
chr5	106536364	106537164	Intergenic	Intergenic	-78598	NM_001005477	104382	Mm.271593	NM_001005477	ENSMUSG00000034384	Barhl2	E130309B19Rik|MBH1	BarH like homeobox 2	protein-coding
chr16	95560649	95561390	intron (NM_001302152, intron 1 of 10)	intron (NM_001302152, intron 1 of 10)	25574	NM_001302152	13876	Mm.164531	NM_133659	ENSMUSG00000040732	Erg	D030036I24Rik	ETS transcription factor	protein-coding
chr2	31300428	31301204	Intergenic	Intergenic	-13516	NM_001370902	665700	Mm.80703	NM_177649	ENSMUSG00000055632	Hmcn2	D030068H01	hemicentin 2	protein-coding
chr10	26381932	26382780	Intergenic	L1MA8|LINE|L1	-7137	NM_172787	237339	Mm.338439	NM_172787	ENSMUSG00000039089	L3mbtl3	AI481284|MBT-1	L3MBTL3 histone methyl-lysine binding protein	protein-coding
chr18	68127123	68127825	intron (NM_172631, intron 3 of 5)	intron (NM_172631, intron 3 of 5)	-100472	NM_001357444	52662	Mm.440183	NM_172631	ENSMUSG00000024544	Ldlrad4	8230401C20Rik|A430083H02|A430108L08Rik|C18orf1|D18Ertd653e|D330030L18Rik	low density lipoprotein receptor class A domain containing 4	protein-coding
chr12	16450203	16450409	Intergenic	(GAGAA)n|Simple_repeat|Simple_repeat	139464	NM_001130412	14245	Mm.153625	NM_015763	ENSMUSG00000020593	Lpin1	Lipin1|fld	lipin 1	protein-coding
chr3	45089589	45089825	Intergenic	(GAGAA)n|Simple_repeat|Simple_repeat	288553	NR_045172	72511	Mm.140700	NR_045172	ENSMUSG00000097040	2610316D01Rik	-	RIKEN cDNA 2610316D01 gene	ncRNA
chr4	57416262	57416791	Intergenic	Intergenic	-52234	NR_038178	73349	Mm.393774	NR_038178		1700042G15Rik	-	RIKEN cDNA 1700042G15 gene	ncRNA
chr6	143276187	143276847	intron (NR_027803, intron 3 of 3)	intron (NR_027803, intron 3 of 3)	30629	NR_027803	52285	Mm.354898	NM_001033129		D6Ertd474e	1700001I24Rik|AU023129	DNA segment, Chr 6, ERATO Doi 474, expressed	ncRNA
chr14	88702567	88702790	Intergenic	(TTCTC)n|Simple_repeat|Simple_repeat	-231282	NM_178685	219257	Mm.128861	NM_178685	ENSMUSG00000050505	Pcdh20	C630015B17Rik|Pcdh13	protocadherin 20	protein-coding
chr12	86429086	86429830	intron (NM_011934, intron 1 of 6)	intron (NM_011934, intron 1 of 6)	7814	NM_011934	26380	Mm.235550	NM_011934	ENSMUSG00000021255	Esrrb	Err2|Errb|Estrrb|Nr3b2	estrogen related receptor, beta	protein-coding
chr17	29562725	29563535	intron (NM_198647, intron 1 of 12)	intron (NM_198647, intron 1 of 12)	13328	NM_198647	381085	Mm.328934	NM_198647	ENSMUSG00000042203	Tbc1d22b	BC045600	TBC1 domain family, member 22B	protein-coding
chr8	11354101	11354876	intron (NM_009932, intron 4 of 47)	intron (NM_009932, intron 4 of 47)	-41662	NM_009931	12826	Mm.738	NM_009931	ENSMUSG00000031502	Col4a1	Bru|Col4a-1|Raw|Svc	collagen, type IV, alpha 1	protein-coding
chr6	9889880	9890224	Intergenic	Intergenic	940033	NM_008751	18231	Mm.46954	NM_008751	ENSMUSG00000046178	Nxph1	C130005L03Rik	neurexophilin 1	protein-coding
chr5	15482803	15484012	Intergenic	Lx2A1|LINE|L1	45815	NM_001310449	100861755	Mm.382859	NM_001310449	ENSMUSG00000106445	Gm21190	-	predicted gene, 21190	protein-coding
chr13	70092690	70093614	intron (NR_131156, intron 2 of 2)	intron (NR_131156, intron 2 of 2)	-64804	NR_045965	74280	Mm.273343	NR_045965	ENSMUSG00000099639	1700084F23Rik	1700003E18Rik|4930589D02Rik	RIKEN cDNA 1700084F23 gene	ncRNA
chr2	35061830	35062024	promoter-TSS (NM_010406)	promoter-TSS (NM_010406)	-515	NM_010406	15139	Mm.2168	NM_010406	ENSMUSG00000026874	Hc	C5|C5a|He|Hfib2	hemolytic complement	protein-coding
chr5	38345768	38346185	intron (NR_046191, intron 2 of 2)	intron (NR_046191, intron 2 of 2)	1587	NR_046191	78172	Mm.243835	NR_046191	ENSMUSG00000106932	4930487D11Rik	-	RIKEN cDNA 4930487D11 gene	ncRNA
chr6	142685945	142686873	intron (NM_011511, intron 7 of 39)	intron (NM_011511, intron 7 of 39)	15865	NM_001044720	20928	Mm.35670	NM_011511	ENSMUSG00000030249	Abcc9	AI414027|AI449286|SUR2A|SUR2B|Sur2	ATP-binding cassette, sub-family C (CFTR/MRP), member 9	protein-coding
chr14	33793762	33794896	Intergenic	Intergenic	16954	NR_131114	218902	Mm.107791	NR_131113	ENSMUSG00000115751	4930503F20Rik	4930453C15	RIKEN cDNA 4930503F20 gene	ncRNA
chr11	67899905	67900864	intron (NM_173754, intron 3 of 14)	intron (NM_173754, intron 3 of 14)	21769	NM_173754	216835	Mm.158885	NM_173754	ENSMUSG00000020905	Usp43	-	ubiquitin specific peptidase 43	protein-coding
chr5	15663278	15664138	Intergenic	Lx2A1|LINE|L1	-6649	NR_073011	381715	Mm.382859	NR_073011	ENSMUSG00000069720	4930572O03Rik	-	spermatogenesis associated glutamate (E)-rich protein pseudogene	pseudo
chr17	80823165	80823687	Intergenic	Intergenic	-73367	NR_131127	320784	Mm.474182	NR_131127	ENSMUSG00000112121	C230072F16Rik	-	RIKEN cDNA C230072F16 gene	ncRNA
chr18	75957561	75958367	intron (NM_145356, intron 2 of 4)	intron (NM_145356, intron 2 of 4)	-101362	NM_001357506	207259	Mm.159332	NM_145356	ENSMUSG00000044646	Zbtb7c	B230208J24Rik|Kr-pok|Zbtb36	zinc finger and BTB domain containing 7C	protein-coding
chr6	141033666	141034417	Intergenic	Intergenic	-215228	NM_018779	54611	Mm.103728	NM_018779	ENSMUSG00000041741	Pde3a	A930022O17Rik|C87899	phosphodiesterase 3A, cGMP inhibited	protein-coding
chr11	71830398	71830958	Intergenic	Intergenic	79663	NM_001357965	216881	Mm.48648	NM_177618	ENSMUSG00000020811	Wscd1	mKIAA0523	WSC domain containing 1	protein-coding
chr1	185326892	185327432	intron (NM_198653, intron 2 of 22)	intron (NM_198653, intron 2 of 22)	2239	NM_198653	381314	Mm.275841	NM_198653	ENSMUSG00000026618	Iars2	2010002H18Rik|C79125	isoleucine-tRNA synthetase 2, mitochondrial	protein-coding
chr5	132171544	132172293	intron (NM_001363480, intron 2 of 19)	MTE2b|LTR|ERVL-MaLR	291649	NR_040704	75369	Mm.389696	NR_040704	ENSMUSG00000105773	4930563F08Rik	-	RIKEN cDNA 4930563F08 gene	ncRNA
chr9	14042786	14043496	Intergenic	PB1D7|SINE|Alu	136931	NR_162811	114483371		NR_162811		Mir12204	mmu-mir-12204	microRNA mir-12204	ncRNA
chr6	142510099	142510439	Intergenic	Intergenic	-2312	NM_008492	16832	Mm.9745	NM_008492	ENSMUSG00000030246	Ldhb	AI790582|H-Ldh|LDH-B|LDH-H|Ldh-2|Ldh2	lactate dehydrogenase B	protein-coding
chr4	132233553	132234394	intron (NM_001122992, intron 7 of 10)	intron (NM_001122992, intron 7 of 10)	-13384	NR_036572	664903	Mm.425212	NR_036572		Rps15a-ps4	Gm13253|Lethe	ribosomal protein S15A, pseudogene 4	pseudo
chr13	94611117	94611827	Intergenic	Intergenic	-177448	NM_009321	21371	Mm.379025	NM_009321	ENSMUSG00000042043	Tbca	Tbca13	tubulin cofactor A	protein-coding
chr9	70314670	70315461	intron (NM_181072, intron 4 of 27)	intron (NM_181072, intron 4 of 27)	90688	NR_049200	100885839		NR_049200	ENSMUSG00000093763	Mir5626	Gm25590|mir-5626|mmu-mir-5626	microRNA 5626	ncRNA
chr10	127114397	127115420	intron (NM_001171026, intron 5 of 14)	intron (NM_001171026, intron 5 of 14)	6252	NM_177614	216440	Mm.295246	NM_177614	ENSMUSG00000040462	Os9	4632413K17Rik|AU022351	amplified in osteosarcoma	protein-coding
chr8	126692526	126693270	Intergenic	MTEb|LTR|ERVL-MaLR	-98912	NM_001164598	270110	Mm.334918	NM_001164598	ENSMUSG00000051495	Irf2bp2	E130305N23Rik|IRF-2BP2	interferon regulatory factor 2 binding protein 2	protein-coding
chr2	120968284	120968783	intron (NM_009461, intron 1 of 46)	intron (NM_009461, intron 1 of 46)	2182	NM_009461	22222	Mm.389330	NM_009461	ENSMUSG00000027272	Ubr1	AI504731	ubiquitin protein ligase E3 component n-recognin 1	protein-coding
chr8	123855231	123855772	intron (NM_028536, intron 2 of 3)	intron (NM_028536, intron 2 of 3)	4708	NM_028536	73420	Mm.157746	NM_028536	ENSMUSG00000031971	Ccsap	1700054N08Rik|AI853424	centriole, cilia and spindle associated protein	protein-coding
chr8	117818926	117819462	Intergenic	Intergenic	-17220	NM_026758	68533	Mm.181836	NM_026758	ENSMUSG00000031843	Mphosph6	1110001M01Rik|AA536809|C86426	M phase phosphoprotein 6	protein-coding
chr18	34923797	34924506	intron (NM_144866, intron 2 of 10)	intron (NM_144866, intron 2 of 10)	7852	NM_144866	225363	Mm.329353	NM_144866	ENSMUSG00000024360	Etf1	AI463371|D6Ertd109e|ERF|ERF1|SUP45L1|TB3-1	eukaryotic translation termination factor 1	protein-coding
chr19	55824993	55825914	intron (NM_001331150, intron 5 of 14)	intron (NM_001331150, intron 5 of 14)	-69868	NM_001142924	21416	Mm.139815	NM_009333	ENSMUSG00000024985	Tcf7l2	TCF4B|TCF4E|Tcf-4|Tcf4	transcription factor 7 like 2, T cell specific, HMG box	protein-coding
chr9	3023451	3023724	Intergenic	GSAT_MM|Satellite|Satellite	15156	NR_039546	100628572		NR_039546	ENSMUSG00000106183	Mir101c	mir-101c|mmu-mir-101c	microRNA 101c	ncRNA
chr5	88883056	88883725	Intergenic	Intergenic	-3870	NM_001136260	54403	Mm.41044	NM_018760	ENSMUSG00000060961	Slc4a4	AI835705|NBC|NBC1	solute carrier family 4 (anion exchanger), member 4	protein-coding
chr4	120396590	120397262	Intergenic	Intergenic	-8355	NM_001159630	29871	Mm.427014	NM_013883	ENSMUSG00000000085	Scmh1	AI315320|AI851618|Scml1|Scml3	sex comb on midleg homolog 1	protein-coding
chr4	100416695	100417582	intron (NM_013845, intron 7 of 8)	intron (NM_013845, intron 7 of 8)	-61729	NM_001033773	381534	Mm.318133	NM_001033773	ENSMUSG00000069733	Ube2u	-	ubiquitin-conjugating enzyme E2U (putative)	protein-coding
chr3	153108116	153108928	Intergenic	Intergenic	43586	NR_108044	75001		NR_108044		4930482G09Rik	-	RIKEN cDNA 4930482G09 gene	ncRNA
chr15	77068222	77068919	Intergenic	Intergenic	-15828	NR_108037	74303	Mm.444304	NR_108037	ENSMUSG00000097267	1700109K24Rik	4933425G21Rik	RIKEN cDNA 1700109K24 gene	ncRNA
chr16	48398690	48399262	TTS (NR_015373)	TTS (NR_015373)	13440	NR_015373	433023	Mm.483302	NR_015373	ENSMUSG00000110573	Gm5485	EG433023	predicted gene 5485	ncRNA
chr13	70710472	70710946	Intergenic	L1M4|LINE|L1	-73075	NM_144837	218333	Mm.139738	NM_144837	ENSMUSG00000034525	Ice1	C77245|mKIAA0947	interactor of little elongation complex ELL subunit 1	protein-coding
chr16	93883703	93885315	exon (NM_028083, exon 2 of 14)	exon (NM_028083, exon 2 of 14)	608	NM_028083	110749	Mm.274222	NM_028083	ENSMUSG00000022945	Chaf1b	2600017H24Rik|C76145|CAF-I p60|CAF-Ip60|CAF1|CAF1A|CAF1P60|MPHOSPH7	chromatin assembly factor 1, subunit B (p60)	protein-coding
chr1	34166280	34166994	intron (NM_001276764, intron 23 of 102)	intron (NM_001276764, intron 23 of 102)	6377	NM_010081	13518	Mm.336625	NM_010081	ENSMUSG00000026131	Dst	2310001O04Rik|A830042E19Rik|AW554249|BP230|BPAG1-n|Bpag|Bpag1|Macf2|ah|athetoid|dt|mKIAA0728|nmf203|nmf339	dystonin	protein-coding
chr2	4700254	4701408	Intergenic	Intergenic	-17000	NM_001190400	209645	Mm.149539	NM_178663	ENSMUSG00000048186	Bend7	1110017O21Rik|E130319B15Rik	BEN domain containing 7	protein-coding
chr13	46518833	46519498	intron (NM_026056, intron 1 of 12)	intron (NM_026056, intron 1 of 12)	17262	NM_026056	67252	Mm.44529	NM_026056	ENSMUSG00000021373	Cap2	2810452G09Rik|AV045235	CAP, adenylate cyclase-associated protein, 2 (yeast)	protein-coding
chr5	120983771	120984602	intron (NM_011286, intron 3 of 21)	intron (NM_011286, intron 3 of 21)	24298	NM_001302345	19894	Mm.181166	NM_011286	ENSMUSG00000029608	Rph3a	2900002P20Rik|AU022689|AW108370	rabphilin 3A	protein-coding
chr10	95404720	95405450	Intergenic	Intergenic	10198	NM_001168657	216233	Mm.474283	NM_007706	ENSMUSG00000020027	Socs2	8030460M17|AI527257|AW108012|CIS2|Cish2|D130043N08Rik|JAB|SOCS-2|SSI-2|hg	suppressor of cytokine signaling 2	protein-coding
chr14	75669293	75669719	intron (NM_001369022, intron 4 of 12)	intron (NM_001369022, intron 4 of 12)	27247	NM_029230	75272	Mm.159483	NM_029230	ENSMUSG00000022002	Erich6b	4930564B18Rik|Gm46471	glutamate rich 6B	protein-coding
chr17	61489754	61489955	Intergenic	(GAGAA)n|Simple_repeat|Simple_repeat	1391463	NM_010109	13640	Mm.7978	NM_010109	ENSMUSG00000048915	Efna5	AL-1|AV158822|EFL-5|Ephrin-A5|Epl7|LERK-7|RAGS	ephrin A5	protein-coding
chr1	92841353	92842135	intron (NM_016696, intron 1 of 8)	MTE2b|LTR|ERVL-MaLR	-8634	NR_029559	387167		NR_029559	ENSMUSG00000065470	Mir149	Mirn149|mir-149|mmu-mir-149	microRNA 149	ncRNA
chr1	30964694	30964882	Intergenic	(TTCTC)n|Simple_repeat|Simple_repeat	-15033	NM_011200	19243	Mm.491181	NM_011200	ENSMUSG00000026064	Ptp4a1	AA415290|AU019864|C130021B01|Prl-1	protein tyrosine phosphatase 4a1	protein-coding
chr19	28525735	28526196	intron (NM_175459, intron 4 of 10)	intron (NM_175459, intron 4 of 10)	-152259	NR_045330	320176	Mm.406716	NR_045330	ENSMUSG00000097735	D930032P07Rik	-	RIKEN cDNA D930032P07 gene	ncRNA
chr6	141524447	141525114	intron (NR_149743, intron 1 of 14)	(TCTA)n|Simple_repeat|Simple_repeat	426	NM_021471	58807	Mm.284495	NM_021471	ENSMUSG00000030235	Slco1c1	OATP-14|OATP-F|Oatp2|Oatpf|Slc21a14	solute carrier organic anion transporter family, member 1c1	protein-coding
chr2	69355474	69355723	Intergenic	L1Md_F2|LINE|L1	-12982	NM_021022	27413	Mm.439855	NM_021022	ENSMUSG00000027048	Abcb11	ABC16|Bsep|Lith1|PFIC2|PGY4|SPGP	ATP-binding cassette, sub-family B (MDR/TAP), member 11	protein-coding
chr8	119743013	119743849	intron (NM_026922, intron 13 of 26)	B1F|SINE|Alu	34985	NM_028883	74347	Mm.358759	NM_028883	ENSMUSG00000034105	Meak7	4632415K11Rik|Kiaa1609|Tldc1	MTOR associated protein , eak-7 homolog	protein-coding
chr10	67420543	67421281	Intergenic	ORR1E|LTR|ERVL-MaLR	-116957	NM_010118	13654	Mm.290421	NM_010118	ENSMUSG00000037868	Egr2	Egr-2|Krox-20|Krox20|NGF1-B|Zfp-25|Zfp-6	early growth response 2	protein-coding
chr18	66509290	66509907	non-coding (NR_040528, exon 3 of 3)	non-coding (NR_040528, exon 3 of 3)	5420	NR_040528	100503565	Mm.98256	NR_040528	ENSMUSG00000118376	Gm9926	-	predicted gene 9926	ncRNA
chr17	49196245	49197008	Intergenic	Intergenic	-83093	NR_038141	69311	Mm.46140	NR_038141	ENSMUSG00000101012	1700008K24Rik	-	RIKEN cDNA 1700008K24 gene	ncRNA
chr10	66660998	66661929	Intergenic	Intergenic	258921	NR_138560	68488	Mm.338835	NR_138560		1110002J07Rik	-	RIKEN cDNA 1110002J07 gene	ncRNA
chr10	122619356	122620057	Intergenic	Intergenic	-28633	NR_105839	102465223		NR_105839	ENSMUSG00000098522	Mir6412	Gm27364|mmu-mir-6412	microRNA 6412	ncRNA
chr17	70780778	70781444	intron (NM_177639, intron 8 of 11)	intron (NM_177639, intron 8 of 11)	65666	NM_001164077	21815	Mm.101034	NM_009372	ENSMUSG00000047407	Tgif1	AA959811|AI462167|Tgif	TGFB-induced factor homeobox 1	protein-coding
chr11	121456721	121457341	intron (NM_029878, intron 2 of 38)	intron (NM_029878, intron 2 of 38)	5040	NM_029878	108903	Mm.23686	NM_029878	ENSMUSG00000039230	Tbcd	2310057L06Rik|A030005L14Rik|mKIAA0988	tubulin-specific chaperone d	protein-coding
chr6	142966120	142966571	Intergenic	Intergenic	-1893	NM_011374	20449	Mm.260838	NM_011374	ENSMUSG00000030283	St8sia1	9330109E03Rik|GD3S|Sia-T|Siat8|Siat8a	ST8 alpha-N-acetyl-neuraminide alpha-2,8-sialyltransferase 1	protein-coding
chr17	66747364	66748143	intron (NM_008984, intron 18 of 30)	intron (NM_008984, intron 18 of 30)	33297	NR_151453	102639882	Mm.443262	NR_151453		1700016K05Rik	-	RIKEN cDNA 1700016K05 gene	ncRNA
chr5	45926175	45926817	TTS (NR_110478)	TTS (NR_110478)	5913	NR_110478	78106	Mm.243807	NR_110478	ENSMUSG00000106602	4930405L22Rik	-	RIKEN cDNA 4930405L22 gene	ncRNA
chr10	102127624	102128503	intron (NM_001205098, intron 3 of 7)	MLT1J-int|LTR|ERVL-MaLR	-30795	NM_001162368	67569	Mm.25252	NM_026243	ENSMUSG00000019888	Mgat4c	9130411I17Rik|GntIVh	MGAT4 family, member C	protein-coding
chr2	128680464	128681053	intron (NM_008569, intron 3 of 47)	intron (NM_008569, intron 3 of 47)	6637	NM_008569	17222	Mm.277408	NM_008569	ENSMUSG00000014355	Anapc1	2610021O03Rik|AI047775|AI853536|AW547281|Apc1|Mcpr|tsg24	anaphase promoting complex subunit 1	protein-coding
chr6	132779358	132779740	Intergenic	Lx2B|LINE|L1	-1387	NM_181276	353165	Mm.377889	NM_181276	ENSMUSG00000053217	Tas2r136	Tas2r36|mt2r52	taste receptor, type 2, member 136	protein-coding
chr5	138149049	138150258	intron (NM_019747, intron 4 of 4)	intron (NM_019747, intron 4 of 4)	6091	NM_019747	56314	Mm.19274	NM_019747	ENSMUSG00000037007	Zfp113	4732456B05Rik|mKIAA4229	zinc finger protein 113	protein-coding
chr17	34162654	34163135	Intergenic	Intergenic	9703	NM_010387	14999	Mm.460938	NM_010387	ENSMUSG00000079547	H2-DMb1	AI385589|H-2Mb1|H2-Mb1	histocompatibility 2, class II, locus Mb1	protein-coding
chr12	100072927	100073785	Intergenic	MER34A|LTR|ERV1	-38975	NM_008947	19179	Mm.157105	NM_008947	ENSMUSG00000021178	Psmc1	AI325227|P26s4|Rpt2/S4|S4|rpt2	protease (prosome, macropain) 26S subunit, ATPase 1	protein-coding
chr18	69469161	69469948	intron (NM_001361127, intron 5 of 19)	intron (NM_001361127, intron 5 of 19)	123394	NM_001361128	21413	Mm.4269	NM_013685	ENSMUSG00000053477	Tcf4	5730422P05Rik|ASP-I2|E2-2|E2.2|ITF-2|ITF-2b|ITF2|ME2|MITF-2A|MITF-2B|SEF-2|SEF2|SEF2-1|TFE|Tcf-4|bHLHb19	transcription factor 4	protein-coding
chr17	84855227	84855864	Intergenic	Intergenic	-64759	NM_028233	72416	Mm.217027	NM_028233	ENSMUSG00000024120	Lrpprc	3110001K13Rik|C76645|Gp130|Lrp130|Lsfc	leucine-rich PPR-motif containing	protein-coding
chr10	75127119	75127980	intron (NM_001081412, intron 2 of 22)	intron (NM_001081412, intron 2 of 22)	66653	NM_001081412	110279	Mm.333722	NM_001081412	ENSMUSG00000009681	Bcr	5133400C09Rik|AI561783|AI853148|mKIAA3017	breakpoint cluster region	protein-coding
chr13	69594654	69595345	exon (NM_175283, exon 3 of 5)	exon (NM_175283, exon 3 of 5)	16464	NM_175283	78925	Mm.451912	NM_175283	ENSMUSG00000021594	Srd5a1	0610031P22Rik|4930435F02Rik|S5AR 1|Srd5a-1	steroid 5 alpha-reductase 1	protein-coding
chr8	35173489	35174049	Intergenic	Intergenic	-201990	NM_001364451	244416	Mm.247126	NM_177741	ENSMUSG00000046794	Ppp1r3b	6430576E21|AW821953|GL|PTG	protein phosphatase 1, regulatory subunit 3B	protein-coding
chr15	101800745	101801820	intron (NM_212485, intron 1 of 8)	intron (NM_212485, intron 1 of 8)	1078	NM_212485	223915	Mm.291498	NM_212485	ENSMUSG00000063661	Krt73	BC067067|CK-73|K73|Kb36	keratin 73	protein-coding
chr16	91282592	91283039	Intergenic	Intergenic	13046	NM_016968	50914	Mm.39300	NM_016968	ENSMUSG00000046160	Olig1	AI836478|AW494459|Bhlhb6|Olg-1|Oligo1|bHLHe21	oligodendrocyte transcription factor 1	protein-coding
chr5	141951907	141952808	intron (NM_177879, intron 8 of 44)	MTEb|LTR|ERVL-MaLR	-449140	NM_199068	17425	Mm.24214	NM_010812	ENSMUSG00000056493	Foxk1	A630048H08Rik|AI463295|Gm10868|Mnf	forkhead box K1	protein-coding
chr8	11119603	11120536	Intergenic	Intergenic	-111140	NM_001081212	384783	Mm.407207	NM_001081212	ENSMUSG00000038894	Irs2	Irs-2	insulin receptor substrate 2	protein-coding
chr3	148639510	148640271	Intergenic	Intergenic	314745	NM_001081298	99633	Mm.9776	NM_001081298	ENSMUSG00000028184	Adgrl2	AI450192|CIRL-2|Gm619|Lec1|Lphh1|Lphn2|mKIAA0786	adhesion G protein-coupled receptor L2	protein-coding
chr4	124647794	124648377	Intergenic	Intergenic	-9561	NM_011141	18991	Mm.297371	NM_011141	ENSMUSG00000090125	Pou3f1	Oct-6|Oct6|Otf-6|Otf6|Scip|Test1|Tst-1|Tst1	POU domain, class 3, transcription factor 1	protein-coding
chr15	37950527	37951005	intron (NM_001357022, intron 2 of 8)	intron (NM_001357022, intron 2 of 8)	10090	NM_001357023	382985	Mm.24738	NM_199476	ENSMUSG00000022292	Rrm2b	p53R2	ribonucleotide reductase M2 B (TP53 inducible)	protein-coding
chr18	68876479	68877212	Intergenic	Intergenic	74683	NR_038051	78931	Mm.160155	NR_038051	ENSMUSG00000024546	4930546C10Rik	-	RIKEN cDNA 4930546C10 gene	ncRNA
chr17	63823644	63824433	Intergenic	Lx7|LINE|L1	-39943	NM_001037997	14158	Mm.23039	NM_008000	ENSMUSG00000000127	Fer	AV082135|C330004K01Rik|Fert|Fert2	fer (fms/fps related) protein kinase	protein-coding
chr3	130768358	130768796	Intergenic	(CAAAA)n|Simple_repeat|Simple_repeat	-38179	NM_001005859	68436	Mm.140568	NM_026724	ENSMUSG00000062006	Rpl34	1100001I22Rik	ribosomal protein L34	protein-coding
chr9	100361988	100362359	Intergenic	(TA)n|Simple_repeat|Simple_repeat	124300	NM_001033543	213208	Mm.242896	NM_001033543	ENSMUSG00000044244	Il20rb	AV228068|Fndc6|Gm186|Il20R2	interleukin 20 receptor beta	protein-coding
chr9	122709963	122710666	Intergenic	Intergenic	27438	NR_029819	387156		NR_029819	ENSMUSG00000065414	Mir138-1	Mirn138|Mirn138-1|mir-138-1	microRNA 138-1	ncRNA
chr1	132520157	132520980	intron (NM_177129, intron 16 of 22)	intron (NM_177129, intron 16 of 22)	14338	NM_029025	74626	Mm.34611	NM_029025	ENSMUSG00000048174	Tmem81	4930429O20Rik|AI465369	transmembrane protein 81	protein-coding
chr17	33674630	33675307	intron (NM_001109913, intron 2 of 16)	intron (NM_001109913, intron 2 of 16)	10490	NM_001109913	76936	Mm.311439	NM_029804	ENSMUSG00000059208	Hnrnpm	2610023M21Rik|AA409009|Hnrpm|mKIAA4193	heterogeneous nuclear ribonucleoprotein M	protein-coding
chr10	68771351	68771739	intron (NM_177794, intron 4 of 5)	intron (NM_177794, intron 4 of 5)	47799	NM_177794	327766	Mm.2479	NM_177794	ENSMUSG00000060044	Tmem26	3230401A06|AI195372	transmembrane protein 26	protein-coding
chr14	121084670	121085361	intron (NM_134082, intron 1 of 26)	intron (NM_134082, intron 1 of 26)	49441	NM_134082	223254	Mm.223980	NM_134082	ENSMUSG00000025555	Farp1	AW228844|BC030329|Cdep	FERM, RhoGEF (Arhgef) and pleckstrin domain protein 1 (chondrocyte-derived)	protein-coding
chr10	89424510	89425239	intron (NM_001033331, intron 7 of 10)	intron (NM_001033331, intron 7 of 10)	19093	NM_001284344	237436	Mm.11982	NM_001033331	ENSMUSG00000074802	Gas2l3	8430435B07Rik|Gm240	growth arrest-specific 2 like 3	protein-coding
chr9	116862479	116863324	intron (NM_001172123, intron 4 of 14)	intron (NM_001172123, intron 4 of 14)	389582	NM_001172122	207181	Mm.326411	NM_178660	ENSMUSG00000039607	Rbms3	6720477E09Rik|8430436O14Rik	RNA binding motif, single stranded interacting protein	protein-coding
chr16	21989258	21990113	intron (NM_153404, intron 1 of 8)	intron (NM_153404, intron 1 of 8)	5857	NM_001083894	239759	Mm.33192	NM_153404	ENSMUSG00000044626	Liph	C130037N08Rik|D16Wsu119e|H06|Lpdlr|P3|PLA1B|lpd1|lpd2|mPA-PLA1	lipase, member H	protein-coding
chr5	66062679	66063828	intron (NM_178446, intron 2 of 6)	Lx8b|LINE|L1	34926	NM_139065	245945	Mm.36863	NM_139065	ENSMUSG00000070780	Rbm47	9530077J19Rik	RNA binding motif protein 47	protein-coding
chr5	74116423	74117075	Intergenic	Intergenic	23219	NR_031758	100313943	Mm.46547	NR_031758	ENSMUSG00000093355	Snora26	MBI-6	small nucleolar RNA, H/ACA box 26	snoRNA
chr4	44649460	44650336	intron (NM_008782, intron 5 of 9)	intron (NM_008782, intron 5 of 9)	-42330	NR_039580	100628590		NR_039580	ENSMUSG00000092761	Mir5120	mmu-mir-5120|mu-mir-5120	microRNA 5120	ncRNA
chr5	147127644	147128655	Intergenic	Intergenic	50803	NM_181730	20018	Mm.317557	NM_009087	ENSMUSG00000029642	Polr1d	1110003G10Rik|AC19|RPA16|Rpo1-3	polymerase (RNA) I polypeptide D	protein-coding
chr14	30550636	30551175	intron (NM_009388, intron 1 of 13)	intron (NM_009388, intron 1 of 13)	1774	NM_009388	21881	Mm.290692	NM_009388	ENSMUSG00000021957	Tkt	p68	transketolase	protein-coding
chr8	113551449	113552218	Intergenic	Intergenic	34551	NR_110476	78048	Mm.252797	NR_110476		4930571O06Rik	-	RIKEN cDNA 4930571O06 gene	ncRNA
chr8	9397678	9398357	intron (NM_173446, intron 1 of 2)	intron (NM_173446, intron 1 of 2)	253348	NR_073360	74688	Mm.159298	NR_073360	ENSMUSG00000109215	4930453L07Rik	-	RIKEN cDNA 4930453L07 gene	ncRNA
chr3	147166706	147167318	Intergenic	Intergenic	314645	NM_001302958	70892	Mm.187793	NM_027594	ENSMUSG00000036745	Ttll7	1110049N09Rik|4921517B04Rik|C630030B20|mTTLL7	tubulin tyrosine ligase-like family, member 7	protein-coding
chr8	31595153	31595349	Intergenic	(TTCTC)n|Simple_repeat|Simple_repeat	227502	NR_046272	74517	Mm.390001	NR_046272	ENSMUSG00000109915	7420700N18Rik	-	RIKEN cDNA 7420700N18 gene	ncRNA
chr7	68846099	68846607	Intergenic	Intergenic	-97115	NM_025549	66412	Mm.251199	NM_025549	ENSMUSG00000042659	Arrdc4	2410003C09Rik|AV216361	arrestin domain containing 4	protein-coding
chr1	20273615	20274405	intron (NM_153179, intron 52 of 66)	intron (NM_153179, intron 52 of 66)	-82444	NR_045734	75028	Mm.417820	NR_045734	ENSMUSG00000089914	4930486I03Rik	-	RIKEN cDNA 4930486I03 gene	ncRNA
chr15	62179707	62180414	intron (NR_132747, intron 2 of 4)	intron (NR_132747, intron 2 of 4)	39391	NR_003523	67552	Mm.484027	NM_026230		H2afy3	4933432H23Rik	H2A histone family, member Y3	pseudo
chr4	9664560	9665054	intron (NM_001290367, intron 1 of 22)	intron (NM_001290367, intron 1 of 22)	4355	NM_001177850	65973	Mm.222206	NM_023066	ENSMUSG00000028207	Asph	2310005F16Rik|3110001L23Rik|AI848629|AW261690|AW561901|BAH|C79816|cI-37	aspartate-beta-hydroxylase	protein-coding
chr14	31602836	31603441	Intergenic	Intergenic	-25755	NM_009937	382864	Mm.239821	NM_009937	ENSMUSG00000057606	Colq	A130034K24Rik	collagen-like tail subunit (single strand of homotrimer) of asymmetric acetylcholinesterase	protein-coding
chr6	39371005	39372037	intron (NM_001361618, intron 1 of 15)	(CA)n|Simple_repeat|Simple_repeat	5914	NR_155076	72144	Mm.482167	NM_028123	ENSMUSG00000029924	Slc37a3	2610507O21Rik|AU044904	solute carrier family 37 (glycerol-3-phosphate transporter), member 3	protein-coding
chr2	16904003	16904213	Intergenic	(TTCTC)n|Simple_repeat|Simple_repeat	109618	NR_040632	75069	Mm.50378	NR_040632		4930515L03Rik	-	RIKEN cDNA 4930515L03 gene	ncRNA
chr5	107421531	107422014	intron (NM_001001804, intron 5 of 6)	intron (NM_001001804, intron 5 of 6)	-9777	NM_027599	70902	Mm.55870	NM_027599	ENSMUSG00000033794	Lpcat2b	4921521K07Rik|Aytl1b	lysophosphatidylcholine acyltransferase 2B	protein-coding
chr14	43115887	43116281	Intergenic	Intergenic	-100508	NM_001244671	100042055	Mm.429109	NM_001244671	ENSMUSG00000095226	Gm10377	-	predicted gene 10377	protein-coding
chr3	32867189	32867860	intron (NM_001013024, intron 6 of 20)	intron (NM_001013024, intron 6 of 20)	49898	NM_001013024	72607	Mm.316153	NM_001013024	ENSMUSG00000056900	Usp13	2700071E21Rik|AI848077|ISOT3|IsoT-3	ubiquitin specific peptidase 13 (isopeptidase T-3)	protein-coding
chr15	96922089	96922652	Intergenic	Intergenic	97989	NM_001358060	69354	Mm.250980	NM_027052	ENSMUSG00000022464	Slc38a4	1110012E16Rik|1700012A18Rik|Ata3|mATA3|mNAT3	solute carrier family 38, member 4	protein-coding
chr8	109446886	109447117	Intergenic	Intergenic	-47026	NM_019938	56523	Mm.42166	NM_019938	ENSMUSG00000031727	Pmfbp1	1700016D22Rik|F77|Stap	polyamine modulated factor 1 binding protein 1	protein-coding
chr5	122975487	122976318	intron (NM_001003953, intron 4 of 22)	B1F|SINE|Alu	13197	NM_001003953	30841	Mm.86406	NM_013910	ENSMUSG00000029475	Kdm2b	Cxxc2|Fbl10|Fbxl10|Jhdm1b|PCCX2	lysine (K)-specific demethylase 2B	protein-coding
chr3	144803847	144805002	intron (NM_030601, intron 11 of 13)	intron (NM_030601, intron 11 of 13)	15070	NM_030601	80797	Mm.20897	NM_030601	ENSMUSG00000028262	Clca3a2	Clca2	chloride channel accessory 3A2	protein-coding
chr5	115832240	115832985	Intergenic	Intergenic	-13044	NM_007708	12704	Mm.8321	NM_007708	ENSMUSG00000029516	Cit	C030025P15Rik|CRIK|CRIK-SK|Cit-k	citron	protein-coding
chr5	116779317	116780138	Intergenic	Intergenic	-187910	NM_026886	68955	Mm.146779	NM_026886	ENSMUSG00000063919	Srrm4	1500001A10Rik|B230202K19Rik|bv|mKIAA1853|nSR100	serine/arginine repetitive matrix 4	protein-coding
chr13	57517344	57518264	intron (NM_001166466, intron 6 of 11)	intron (NM_001166466, intron 6 of 11)	390528	NM_001166463	20745	Mm.379020	NM_009262	ENSMUSG00000056222	Spock1	Spock|Ticn1|testican	sparc/osteonectin, cwcv and kazal-like domains proteoglycan 1	protein-coding
chr9	65462237	65463086	promoter-TSS (NM_001357813)	promoter-TSS (NM_001357813)	-40	NM_001357813	27965	Mm.272475	NM_138584	ENSMUSG00000032388	Spg21	ACP33|BM-019|C78576|D9Wsu18e|GL010|MAST	SPG21, maspardin	protein-coding
chr15	27952145	27952520	intron (NM_001081302, intron 1 of 56)	B1_Mur3|SINE|Alu	73516	NM_001081302	223435	Mm.485422	NM_001081302	ENSMUSG00000022263	Trio	6720464I07Rik|AA408740|Solo	triple functional domain (PTPRF interacting)	protein-coding
chr13	57114110	57114630	Intergenic	Lx8|LINE|L1	-218581	NM_001302372	26946	Mm.62409	NM_012035	ENSMUSG00000021541	Trpc7	TRP7|Trrp8	transient receptor potential cation channel, subfamily C, member 7	protein-coding
chr14	28534855	28535242	Intergenic	Intergenic	23643	NM_001256224	22418	Mm.287544	NM_009524	ENSMUSG00000021994	Wnt5a	8030457G12Rik|Wnt-5a	wingless-type MMTV integration site family, member 5A	protein-coding
chr11	35203917	35204823	intron (NM_011412, intron 3 of 35)	intron (NM_011412, intron 3 of 35)	82914	NM_011412	20564	Mm.478604	NM_011412	ENSMUSG00000056427	Slit3	Slil2|Slit1|b2b2362.1Clo	slit guidance ligand 3	protein-coding
chr2	73957358	73958170	Intergenic	Intergenic	-46438	NM_175015	228033	Mm.2966	NM_175015	ENSMUSG00000018770	Atp5g3	6030447M23|Atp5mc3	ATP synthase, H+ transporting, mitochondrial F0 complex, subunit C3 (subunit 9)	protein-coding
chr9	65036001	65036711	intron (NM_028906, intron 2 of 20)	intron (NM_028906, intron 2 of 20)	3898	NM_028906	74388	Mm.202749	NM_028906	ENSMUSG00000032393	Dpp8	2310004I03Rik|4932434F09Rik|AI666706|DPP VIII	dipeptidylpeptidase 8	protein-coding
chr4	31801995	31802195	Intergenic	(GAGAA)n|Simple_repeat|Simple_repeat	-162012	NM_172688	26409	Mm.258589	NM_009316	ENSMUSG00000028284	Map3k7	B430101B05|C87327|Tak1	mitogen-activated protein kinase kinase kinase 7	protein-coding
chr9	101069841	101070462	Intergenic	Intergenic	-4611	NM_001100451	77853	Mm.326206	NM_001100451	ENSMUSG00000066415	Msl2	E130103E02Rik|Msl2l1|Rnf184	MSL complex subunit 2	protein-coding
chr16	93892797	93893676	intron (NM_028083, intron 8 of 13)	intron (NM_028083, intron 8 of 13)	9335	NM_028083	110749	Mm.274222	NM_028083	ENSMUSG00000022945	Chaf1b	2600017H24Rik|C76145|CAF-I p60|CAF-Ip60|CAF1|CAF1A|CAF1P60|MPHOSPH7	chromatin assembly factor 1, subunit B (p60)	protein-coding
chr2	165511080	165511808	intron (NM_130451, intron 1 of 4)	(CCCCAG)n|Simple_repeat|Simple_repeat	7547	NM_130451	170441	Mm.34147	NM_130451	ENSMUSG00000027661	Slc2a10	AA450473|Glut10	solute carrier family 2 (facilitated glucose transporter), member 10	protein-coding
chr5	111621958	111622702	Intergenic	MTEa|LTR|ERVL-MaLR	40769	NR_015546	330164	Mm.193276	NM_177875	ENSMUSG00000052848	C130026L21Rik	-	RIKEN cDNA C130026L21 gene	ncRNA
chr2	98662245	98662884	Intergenic	SYNREP_MM|Satellite|Satellite	1194907	NM_001363049	241568	Mm.241682	NM_178725	ENSMUSG00000050587	Lrrc4c	6430556C10Rik|NGL-1	leucine rich repeat containing 4C	protein-coding
chr18	67191237	67192327	intron (NM_177137, intron 5 of 11)	intron (NM_177137, intron 5 of 11)	-13577	NM_024190	67064	Mm.73777	NM_024190	ENSMUSG00000109901	Chmp1b	2810405I11Rik|Chmp1b1	charged multivesicular body protein 1B	protein-coding
chr12	30691401	30691607	Intergenic	(GAGAA)n|Simple_repeat|Simple_repeat	107061	NM_172049	211986	Mm.34035	NM_172049	ENSMUSG00000043061	Tmem18	BC024093	transmembrane protein 18	protein-coding
chr1	160882748	160883258	Intergenic	MTA_Mm|LTR|ERVL-MaLR	-23408	NM_001024952	381305	Mm.329667	NM_001024952	ENSMUSG00000040423	Rc3h1	5730557L09Rik|Gm551|N28103|mKIAA2025	RING CCCH (C3H) domains 1	protein-coding
chr13	81435736	81436481	intron (NM_054053, intron 68 of 89)	intron (NM_054053, intron 68 of 89)	197036	NM_054053	110789	Mm.288694	NM_054053	ENSMUSG00000069170	Adgrv1	Frings|Gpr98|Mass1|Mgr1|VLGR1	adhesion G protein-coupled receptor V1	protein-coding
chr6	148825495	148826365	intron (NM_001081113, intron 1 of 24)	intron (NM_001081113, intron 1 of 24)	5537	NM_001081113	320727	Mm.260105	NM_001081113	ENSMUSG00000040029	Ipo8	6230418K12Rik|Abcc10|C130009K11Rik|MRP7|OM-1|Om1|Ranbp8	importin 8	protein-coding
chr5	111298784	111299627	Intergenic	Intergenic	-31492	NM_001301644	56305	Mm.200516	NM_019640	ENSMUSG00000050017	Pitpnb	PI-TP-beta	phosphatidylinositol transfer protein, beta	protein-coding
chr10	120147472	120148052	intron (NM_028679, intron 8 of 11)	intron (NM_028679, intron 8 of 11)	-34797	NM_080446	117599	Mm.214703	NM_080446	ENSMUSG00000020228	Helb	AI447783|D10Ertd664e	helicase (DNA) B	protein-coding
chr14	55126301	55127153	Intergenic	Intergenic	-9792	NM_177049	319984	Mm.19047	NM_177049	ENSMUSG00000022208	Jph4	9330157P13Rik|JP-4|JPHL1	junctophilin 4	protein-coding
chr14	110293903	110294316	Intergenic	RLTR17B_Mm|LTR|ERVK	461040	NM_175499	239250	Mm.49728	NM_175499	ENSMUSG00000045871	Slitrk6	4832410J21Rik|Sltk6	SLIT and NTRK-like family, member 6	protein-coding
chr10	126028004	126028501	Intergenic	Intergenic	62033	NM_177152	320398	Mm.275586	NM_177152	ENSMUSG00000020105	Lrig3	9030421L11Rik|9130004I02Rik|9430095K15Rik|mKIAA3016	leucine-rich repeats and immunoglobulin-like domains 3	protein-coding
chr17	4040035	4040850	Intergenic	Intergenic	42553	NR_045764	75815	Mm.183387	NR_045764	ENSMUSG00000116975	4930470H14Rik	-	RIKEN cDNA 4930470H14 gene	ncRNA
chr15	31546079	31546661	Intergenic	ID_B1|SINE|B4	-15333	NM_172606	223455	Mm.272185	NM_172606	ENSMUSG00000039100	2025-03-06	3830408G03|F830029L24Rik|mKIAA0597	membrane-associated ring finger (C3HC4) 6	protein-coding
chr17	34975156	34975767	intron (NM_013558, intron 1 of 1)	intron (NM_013558, intron 1 of 1)	2758	NM_013558	15482	Mm.14287	NM_013558	ENSMUSG00000007033	Hspa1l	Hsc70t|Msh5	heat shock protein 1-like	protein-coding
chr7	35961415	35961890	Intergenic	ORR1B1|LTR|ERVL-MaLR	-158663	NM_177739	668501	Mm.286296	NM_177739	ENSMUSG00000044452	Zfp507	1810022O10Rik|A230056M16Rik|AL024009|AU021817|BB105092|Gm480|Znf507|mKIAA1084	zinc finger protein 507	protein-coding
chr13	60442185	60443241	Intergenic	Intergenic	-159234	NM_029653	69635	Mm.24103	NM_029653	ENSMUSG00000021559	Dapk1	D13Ucla1|DAP-Kinase	death associated protein kinase 1	protein-coding
chr3	146342582	146343239	Intergenic	Intergenic	36034	NR_033542	100038607	Mm.365888	NR_033542	ENSMUSG00000105602	Gm10636	-	predicted gene 10636	ncRNA
chr18	81151079	81151830	Intergenic	Intergenic	-164433	NM_178280	20689	Mm.215917	NM_178280	ENSMUSG00000024565	Sall3	B130022O04Rik|Msal|Msal-1|Sal|Salt|Spalt	spalt like transcription factor 3	protein-coding
chr4	106565490	106566192	intron (NM_053272, intron 2 of 8)	L1ME1|LINE|L1	4803	NM_053272	74754	Mm.133370	NM_053272	ENSMUSG00000034926	Dhcr24	2310076D10Rik|5830417J06Rik|mKIAA0018	24-dehydrocholesterol reductase	protein-coding
chr6	144281453	144282046	Intergenic	ORR1E|LTR|ERVL-MaLR	-72181	NM_001113559	20678	Mm.1752	NM_011444	ENSMUSG00000041540	Sox5	A730017D01Rik|AI528773	SRY (sex determining region Y)-box 5	protein-coding
chr8	116238545	116239250	Intergenic	Intergenic	-266118	NM_029297	75465	Mm.23114	NM_029297	ENSMUSG00000034467	Dynlrb2	1700009A04Rik|DNLC2B|Dncl2b	dynein light chain roadblock-type 2	protein-coding
chr6	91124923	91125497	Intergenic	RMER5|LTR|ERV1	-8384	NM_018815	54563	Mm.28162	NM_018815	ENSMUSG00000030091	Nup210	9830001L10|AI836801|Pom210|gp190|gp210	nucleoporin 210	protein-coding
chr6	144659431	144659998	Intergenic	Intergenic	-13154	NR_040519	66760	Mm.233631	NR_040519	ENSMUSG00000085785	Sox5os3	4933425H06Rik	SRY (sex determining region Y)-box 5, opposite strand 3	ncRNA
chr15	5868951	5869503	Intergenic	Intergenic	175477	NR_155428	105245876	Mm.128197	NR_155428		Gm41259	-	predicted gene, 41259	ncRNA
chr13	118692082	118692707	Intergenic	Intergenic	-22305	NM_008002	14165	Mm.317323	NM_008002	ENSMUSG00000021732	Fgf10	AEY17|BB213776|Fgf-10|Gsfaey17	fibroblast growth factor 10	protein-coding
chr4	123692107	123692944	Intergenic	Intergenic	-8165	NM_001199137	11426	Mm.402299	NM_009600	ENSMUSG00000028649	Macf1	ABP620|Acf7|Aclp7|MACF|R74989|mKIAA0465	microtubule-actin crosslinking factor 1	protein-coding
chr5	127071950	127072501	intron (NR_040685, intron 2 of 6)	MTEa|LTR|ERVL-MaLR	41436	NR_040685	71247	Mm.399586	NR_040685	ENSMUSG00000105490	4933438B17Rik	-	RIKEN cDNA 4933438B17 gene	ncRNA
chr8	41085324	41085905	intron (NM_001005863, intron 1 of 13)	MLT1B|LTR|ERVL-MaLR	29053	NM_001286413	102103	Mm.149438	NM_001005863	ENSMUSG00000045636	Mtus1	AI481402|ATBP135|Atip1|B430010I23Rik|B430305I03Rik|C85752|Cctsg1-440|MD44|MTSG1|mKIAA1288	mitochondrial tumor suppressor 1	protein-coding
chr3	153148983	153149400	intron (NR_108044, intron 2 of 2)	intron (NR_108044, intron 2 of 2)	2917	NR_108044	75001		NR_108044		4930482G09Rik	-	RIKEN cDNA 4930482G09 gene	ncRNA
chr1	115538072	115538769	Intergenic	Lx2B|LINE|L1	-146317	NM_001077425	636808	Mm.101576	NM_001077425	ENSMUSG00000070695	Cntnap5a	Caspr5-1|EG636808	contactin associated protein-like 5A	protein-coding
chr1	89183294	89184111	Intergenic	Intergenic	113287	NM_133816	98402	Mm.170983	NM_133816	ENSMUSG00000036206	Sh3bp4	AI594717|AW227605|BOG25	SH3-domain binding protein 4	protein-coding
chr17	70663837	70664568	intron (NM_027712, intron 5 of 9)	intron (NM_027712, intron 5 of 9)	102455	NM_001128181	224997	Mm.311840	NM_027712	ENSMUSG00000003279	Dlgap1	4933422O14Rik|9630002F18|AI845682|AI848168|BB075781|D17Bwg0511e|GKAP/SAPAP|GKPA/SAPAP|Gkap|Sapap1|mKIAA4162	DLG associated protein 1	protein-coding
chr13	42040383	42041658	Intergenic	Intergenic	-11001	NM_007772	110521	Mm.4808	NM_007772	ENSMUSG00000021366	Hivep1	Cryabp1	human immunodeficiency virus type I enhancer binding protein 1	protein-coding
chr10	19992121	19993027	intron (NM_008580, intron 1 of 29)	intron (NM_008580, intron 1 of 29)	58048	NM_008580	26408	Mm.6595	NM_008580	ENSMUSG00000071369	Map3k5	7420452D20Rik|ASK|ASK1|MAPKKK5|Mekk5	mitogen-activated protein kinase kinase kinase 5	protein-coding
chr18	63574696	63575472	Intergenic	Intergenic	117275	NM_016792	53382	Mm.19169	NM_016792	ENSMUSG00000024583	Txnl1	32kDa|TRP32|Txnl	thioredoxin-like 1	protein-coding
chr8	13940589	13941458	TTS (NM_025785)	TTS (NM_025785)	33284	NM_001359061	66822	Mm.37950	NM_025785	ENSMUSG00000038365	Fbxo25	9130015I06Rik|AI649137|Fbx25	F-box protein 25	protein-coding
chr1	146422728	146422939	Intergenic	(GAGAA)n|Simple_repeat|Simple_repeat	-72796	NM_001357571	215378	Mm.441817	NM_153539	ENSMUSG00000035131	Brinp3	B830045N13Rik|Fam5c	bone morphogenetic protein/retinoic acid inducible neural specific 3	protein-coding
chr11	80890499	80891348	intron (NM_001034013, intron 5 of 9)	intron (NM_001034013, intron 5 of 9)	32534	NM_029367	75622	Mm.26988	NM_029367	ENSMUSG00000053184	Spaca3	1700025M08Rik|ALLP17|Lyc3|SLLP1|mSLLP1	sperm acrosome associated 3	protein-coding
chr8	35851444	35852489	Intergenic	Intergenic	-25407	NM_027998	71908	Mm.37817	NM_027998	ENSMUSG00000055976	Cldn23	2310014B08Rik	claudin 23	protein-coding
chr1	161345911	161346622	Intergenic	MTEa|LTR|ERVL-MaLR	-49172	NM_009452	22164	Mm.4994	NM_009452	ENSMUSG00000026700	Tnfsf4	Ath-1|Ath1|CD134L|OX-40L|Ox40l|TXGP1|Tnlg2b|Txgp1l|gp34	tumor necrosis factor (ligand) superfamily, member 4	protein-coding
chr9	3000244	3000663	Intergenic	GSAT_MM|Satellite|Satellite	38290	NR_039546	100628572		NR_039546	ENSMUSG00000106183	Mir101c	mir-101c|mmu-mir-101c	microRNA 101c	ncRNA
chr2	169754058	169754571	intron (NM_080455, intron 1 of 1)	intron (NM_080455, intron 1 of 1)	121805	NM_177659	228911	Mm.315789	NM_080455	ENSMUSG00000047907	Tshz2	2900073F20Rik|B830045G17|Mtsh2|Sdccag33l|Tsh2|Zfp218|mKIAA4248|teashirt2	teashirt zinc finger family member 2	protein-coding
chr6	146388795	146389746	intron (NM_019923, intron 13 of 56)	intron (NM_019923, intron 13 of 56)	112953	NM_019923	16439	Mm.7800	NM_010586	ENSMUSG00000030287	Itpr2	AI649341|InsP3R-2|InsP3R-5|Ip3r2|Itpr5|insP3R2	inositol 1,4,5-triphosphate receptor 2	protein-coding
chr14	48868832	48869491	Intergenic	Lx8|LINE|L1	-9712	NR_033783	66770	Mm.136954	NR_033783	ENSMUSG00000115008	4933429O19Rik	1700031B11Rik	RIKEN cDNA 4933429O19 gene	ncRNA
chr10	125005548	125006395	Intergenic	Intergenic	302845	NM_001358915	20503	Mm.29161	NM_011391	ENSMUSG00000020102	Slc16a7	4921534N07Rik|9030411M13Rik|D630004K10Rik|Mct2	solute carrier family 16 (monocarboxylic acid transporters), member 7	protein-coding
chr5	52399094	52399946	intron (NM_001256059, intron 9 of 11)	ORR1A2|LTR|ERVL-MaLR	35716	NM_011435	20657	Mm.2407	NM_011435	ENSMUSG00000072941	Sod3	AI314465|EC-SOD	superoxide dismutase 3, extracellular	protein-coding
chr10	123086601	123087345	Intergenic	Intergenic	-10468	NM_153395	67074	Mm.169924	NM_153395	ENSMUSG00000034602	Mon2	2610528O22Rik|AW495628|Sf21|mKIAA1040	MON2 homolog, regulator of endosome to Golgi trafficking	protein-coding
chr11	118975255	118975460	Intergenic	(GAGAA)n|Simple_repeat|Simple_repeat	-12824	NM_001359574	238011	Mm.244114	NM_001030291	ENSMUSG00000046697	Enpp7	Alk-SMase|Gm254	ectonucleotide pyrophosphatase/phosphodiesterase 7	protein-coding
chr15	96787908	96788377	Intergenic	ORR1A4|LTR|ERVL-MaLR	-88414	NM_001355633	67760	Mm.46754	NM_175121	ENSMUSG00000022462	Slc38a2	5033402L14Rik|AI316867|ATA2|SAT2|mKIAA1382	solute carrier family 38, member 2	protein-coding
chr7	110673950	110674772	Intergenic	Intergenic	46704	NM_009627	11535	Mm.1408	NM_009627	ENSMUSG00000030790	Adm	AM	adrenomedullin	protein-coding
chr16	23062580	23062803	intron (NM_023125, intron 3 of 10)	(TCTCC)n|Simple_repeat|Simple_repeat	4391	NM_023125	16644	Mm.2160	NM_023125	ENSMUSG00000022875	Kng1	Kng	kininogen 1	protein-coding
chr3	135819805	135820306	Intergenic	Intergenic	-5224	NM_026228	67547	Mm.30239	NM_026228	ENSMUSG00000053897	Slc39a8	4933419D20Rik|AA986696|BIGM103|ZIP-8|Zip8	solute carrier family 39 (metal ion transporter), member 8	protein-coding
chr17	83088250	83089055	Intergenic	Intergenic	-10427	NR_045094	100503434	Mm.187281	NR_045094	ENSMUSG00000117399	Gm19689	-	predicted gene, 19689	ncRNA
chr5	118812065	118812566	Intergenic	Intergenic	-140024	NR_040694	74627	Mm.410828	NR_040694	ENSMUSG00000107144	4930413E15Rik	-	RIKEN cDNA 4930413E15 gene	ncRNA
chr12	90931113	90931614	Intergenic	Intergenic	-114485	NR_045858	71349	Mm.442093	NR_045858	ENSMUSG00000085004	5430427M07Rik	-	RIKEN cDNA 5430427M07 gene	ncRNA
chr10	95154610	95155292	Intergenic	Intergenic	-9126	NR_131146	628062		NR_131146	ENSMUSG00000112481	Gm29684	-	predicted gene, 29684	ncRNA
chr5	107414209	107414640	intron (NM_001001804, intron 4 of 6)	intron (NM_001001804, intron 4 of 6)	10911	NM_001001804	384214	Mm.489863	NM_001001804	ENSMUSG00000033805	Ephx4	Abhd7|Ephxrp|Gm1382	epoxide hydrolase 4	protein-coding
chr11	118350017	118350710	intron (NM_011594, intron 1 of 4)	intron (NM_011594, intron 1 of 4)	5048	NM_011594	21858	Mm.206505	NM_011594	ENSMUSG00000017466	Timp2	D11Bwg1104e|Timp-2	tissue inhibitor of metalloproteinase 2	protein-coding
chr16	44181623	44182392	intron (NM_001029889, intron 1 of 7)	intron (NM_001029889, intron 1 of 7)	8610	NM_001029889	207806	Mm.310566	NM_001029889	ENSMUSG00000068284	Usf3	5530400K22Rik|Gm1779|Gm608|mKIAA2018	upstream transcription factor family member 3	protein-coding
chr6	118189831	118190621	intron (NM_001080780, intron 1 of 18)	intron (NM_001080780, intron 1 of 18)	7518	NM_009050	19713	Mm.57199	NM_009050	ENSMUSG00000030110	Ret	PTC|RET51|RET9|c-Ret	ret proto-oncogene	protein-coding
chr6	142803641	142804448	intron (NM_001145390, intron 1 of 5)	intron (NM_001145390, intron 1 of 5)	422	NM_001145390	330440	Mm.484618	NM_001033417	ENSMUSG00000048473	Sult6b2	Gm766	sulfotransferase family 6B, member 2	protein-coding
chr19	24447927	24448600	intron (NM_008846, intron 1 of 14)	MTEb|LTR|ERVL-MaLR	29211	NM_026520	68034	Mm.440181	NM_026520	ENSMUSG00000074922	Fam122a	2410124L17Rik|2900009I07Rik|Gm9849	family with sequence similarity 122, member A	protein-coding
chr18	73506707	73507456	Intergenic	Intergenic	-65624	NM_001039214	240396	Mm.24131	NM_001039214	ENSMUSG00000037253	Mex3c	A130001D14Rik|BC035207|BM-013|Rkhd2	mex3 RNA binding family member C	protein-coding
chr3	95918279	95918964	Intergenic	Intergenic	-10636	NM_001253757	66471	Mm.218657	NM_023210	ENSMUSG00000015749	Anp32e	2810018A15Rik|AI047746|AI326868|CPD1|LANP-L|LANPL|mLANP-L	acidic (leucine-rich) nuclear phosphoprotein 32 family, member E	protein-coding
chr1	34730065	34730299	intron (NM_001368773, intron 2 of 13)	(TC)n|Simple_repeat|Simple_repeat	52000	NM_001368773	226970	Mm.41604	NM_183019	ENSMUSG00000037509	Arhgef4	9330140K16Rik|Asef|C230030N03Rik	Rho guanine nucleotide exchange factor (GEF) 4	protein-coding
chr5	106001022	106001698	Intergenic	Intergenic	124792	NM_018759	54367	Mm.248876	NM_018759	ENSMUSG00000029290	Zfp326	5730470H14Rik|ZAN75|Znf326	zinc finger protein 326	protein-coding
chr14	21062309	21063443	intron (NM_134079, intron 1 of 10)	L1M2|LINE|L1	10302	NM_134079	11534	Mm.188734	NM_134079	ENSMUSG00000039197	Adk	2310026J05Rik|5033405D03Rik|AI255373|AI987814|Ak	adenosine kinase	protein-coding
chr8	122217442	122218370	Intergenic	Intergenic	-12368	NM_001362883	195209	Mm.102191	NM_001362883		Zfp469	Gm22	zinc finger protein 469	protein-coding
chr1	187773688	187774440	intron (NM_001357535, intron 1 of 7)	ORR1E|LTR|ERVL-MaLR	121823	NM_001357535	26381	Mm.89989	NM_011935	ENSMUSG00000026610	Esrrg	ERR3|Errg|NR3B3|mKIAA0832	estrogen-related receptor gamma	protein-coding
chr4	141690259	141690722	intron (NM_001017966, intron 8 of 9)	intron (NM_001017966, intron 8 of 9)	-4774	NM_023544	69994	Mm.441022	NM_023544	ENSMUSG00000040715	Rsc1a1	1700027M01Rik|Rs1	regulatory solute carrier protein, family 1, member 1	protein-coding
chr10	120989464	120990259	Intergenic	Intergenic	-10531	NM_001081193	380664	Mm.339371	NM_001081193	ENSMUSG00000048661	Lemd3	AI316861|Man1	LEM domain containing 3	protein-coding
chr3	54666697	54667591	Intergenic	L1MC1|LINE|L1	-25671	NR_152186	56790	Mm.486375	NM_019995	ENSMUSG00000027751	Supt20	AA667204|AI450544|D3Ertd300e|Fam48a|Supt20h|p38IP	suppressor of Ty 20	protein-coding
chr2	11537447	11537963	intron (NM_001177758, intron 1 of 14)	intron (NM_001177758, intron 1 of 14)	16224	NM_001177758	170768	Mm.19669	NM_133232	ENSMUSG00000026773	Pfkfb3	E330010H22Rik|iPFK-2|uPFK-2	6-phosphofructo-2-kinase/fructose-2,6-biphosphatase 3	protein-coding
chr14	5691491	5692132	Intergenic	Intergenic	49791	NM_001256886	100041678	Mm.443041	NM_001256886	ENSMUSG00000096003	Gm3500	100041758|Gm3401	predicted gene 3500	protein-coding
chr18	69344140	69344671	promoter-TSS (NM_013685)	promoter-TSS (NM_013685)	-87	NM_013685	21413	Mm.4269	NM_013685	ENSMUSG00000053477	Tcf4	5730422P05Rik|ASP-I2|E2-2|E2.2|ITF-2|ITF-2b|ITF2|ME2|MITF-2A|MITF-2B|SEF-2|SEF2|SEF2-1|TFE|Tcf-4|bHLHb19	transcription factor 4	protein-coding
chr5	103579841	103580513	intron (NM_011204, intron 39 of 47)	ID_B1|SINE|B4	49226	NM_029415	75750	Mm.7446	NM_029415	ENSMUSG00000029321	Slc10a6	8430417G17Rik|C78479|Soat	solute carrier family 10 (sodium/bile acid cotransporter family), member 6	protein-coding
chr17	88687313	88687906	intron (NM_023630, intron 3 of 8)	intron (NM_023630, intron 3 of 8)	18949	NM_023630	71828	Mm.61330	NM_023630	ENSMUSG00000024154	Gtf2a1l	1700011N16Rik|Alf|Gtf2a1lf	general transcription factor IIA, 1-like	protein-coding
chr8	84056644	84057284	Intergenic	Intergenic	-9872	NM_009055	19724	Mm.7892	NM_009055	ENSMUSG00000031706	Rfx1	AI047719|AI385641	regulatory factor X, 1 (influences HLA class II expression)	protein-coding
chr4	151175579	151176013	intron (NM_001081557, intron 6 of 23)	intron (NM_001081557, intron 6 of 23)	86226	NM_001308446	105704528	Mm.415128	NM_001308446	ENSMUSG00000078491	Gm13090	-	predicted gene 13090	protein-coding
chr7	139388564	139389096	promoter-TSS (NM_001127363)	promoter-TSS (NM_001127363)	-279	NM_183144	212111	Mm.28308	NM_183144	ENSMUSG00000025477	Inpp5a	-	inositol polyphosphate-5-phosphatase A	protein-coding
chr8	78826694	78827275	Intergenic	Intergenic	-5832	NM_030145	78651	Mm.28694	NM_030145	ENSMUSG00000031683	Lsm6	1500031N17Rik|2410088K19Rik|AI747288	LSM6 homolog, U6 small nuclear RNA and mRNA degradation associated	protein-coding
chr19	37671607	37672104	intron (NM_175353, intron 20 of 21)	intron (NM_175353, intron 20 of 21)	-13825	NM_001105201	546726	Mm.457750	NM_001105201	ENSMUSG00000062432	Cyp26c1	EG546726	cytochrome P450, family 26, subfamily c, polypeptide 1	protein-coding
chr3	57452053	57452494	Intergenic	Intergenic	26863	NM_145539	229302	Mm.26618	NM_145539	ENSMUSG00000027801	Tm4sf4	Iltmp	transmembrane 4 superfamily member 4	protein-coding
chr13	48340779	48341477	Intergenic	Intergenic	-67244	NR_045162	320315	Mm.185120	NR_045162	ENSMUSG00000097326	A330048O09Rik	-	RIKEN cDNA A330048O09 gene	ncRNA
chr5	132723767	132724292	Intergenic	MTEb|LTR|ERVL-MaLR	-180809	NM_001363480	319974	Mm.409595	NM_177047	ENSMUSG00000029673	Auts2	2700063G02Rik|A730011F23Rik|D830032G16Rik	autism susceptibility candidate 2	protein-coding
chr15	38641131	38642270	Intergenic	Intergenic	-20204	NM_025494	66335	Mm.276618	NM_025494	ENSMUSG00000022295	Atp6v1c1	1700025B18Rik|U13839	ATPase, H+ transporting, lysosomal V1 subunit C1	protein-coding
chr9	58571083	58571775	Intergenic	B3|SINE|B2	-10811	NR_151824	20320	Mm.15125	NM_009145	ENSMUSG00000032336	Nptn	AW554172|SDR-1|Sdfr1	neuroplastin	protein-coding
chr10	120775115	120775870	intron (NR_038000, intron 2 of 2)	intron (NR_038000, intron 2 of 2)	9760	NR_038003	70874	Mm.427286	NR_038000	ENSMUSG00000044544	4921513I03Rik	-	RIKEN cDNA 4921513I03 gene	ncRNA
chr4	135790501	135790959	intron (NM_001085509, intron 20 of 36)	intron (NM_001085509, intron 20 of 36)	31015	NM_001085509	242702	Mm.318639	NM_001085509	ENSMUSG00000037139	Myom3	8430427K15Rik|Gm434	myomesin family, member 3	protein-coding
chr1	38660861	38661577	Intergenic	Intergenic	-33975	NM_001290814	16764	Mm.336679	NM_010678	ENSMUSG00000037138	Aff3	3222402O04Rik|A730046J16|LAF-4|Laf4	AF4/FMR2 family, member 3	protein-coding
chr5	130464060	130465002	intron (NM_021371, intron 1 of 5)	intron (NM_021371, intron 1 of 5)	15739	NM_021371	140904	Mm.40875	NM_021371	ENSMUSG00000060371	Caln1	9630012C17Rik|Cabp8|MNCb-0849	calneuron 1	protein-coding
chr4	155275097	155276015	intron (NM_001355178, intron 7 of 14)	intron (NM_001355178, intron 7 of 14)	25590	NM_001190445	67513	Mm.10374	NM_001190445	ENSMUSG00000073684	Faap20	2610002J02Rik	Fanconi anemia core complex associated protein 20	protein-coding
chr4	142204758	142205312	intron (NM_144531, intron 1 of 13)	B1_Mur2|SINE|Alu	5173	NM_144531	71529	Mm.255986	NM_144531	ENSMUSG00000040606	Kazn	2310007B04Rik|9030409G11Rik|AI256607|AI666764|AW061099|Kaz|Kazrin	kazrin, periplakin interacting protein	protein-coding
chr12	109519918	109520790	Intergenic	L1MEc|LINE|L1	-20642	NR_027651	17263	Mm.289645	NM_144513	ENSMUSG00000021268	Meg3	2900016C05Rik|3110050O07Rik|6330408G06Rik|AI425946|AW108224|D12Bwg1266e|Gtl2|R74756|R75394	maternally expressed 3	ncRNA
chr5	73237926	73238824	intron (NM_028194, intron 1 of 62)	B4|SINE|B4	18243	NM_028194	72313	Mm.260594	NM_028194	ENSMUSG00000070733	Fryl	2010313D22Rik|2310004H21Rik|2510002A14Rik|9030227G01Rik|mKIAA0826	FRY like transcription coactivator	protein-coding
chr6	34197504	34198729	Intergenic	Intergenic	-21062	NM_021435	58246	Mm.245527	NM_021435	ENSMUSG00000018999	Slc35b4	4930474D06Rik|AB041549|AW494345	solute carrier family 35, member B4	protein-coding
chr11	50406618	50407388	intron (NM_172557, intron 9 of 17)	intron (NM_172557, intron 9 of 17)	24122	NM_172557	216724	Mm.390400	NM_172557	ENSMUSG00000020375	Rufy1	3000002E04Rik|Rabip4|ZFYVE12	RUN and FYVE domain containing 1	protein-coding
chr1	42720600	42721505	Intergenic	Intergenic	-7598	NR_110495	66620	Mm.383631	NR_110495	ENSMUSG00000097063	Pantr2	2610207O16Rik|Pou3f3os2|linc-Brn1b	POU domain, class 3, transcription factor 3 adjacent noncoding transcript 2	ncRNA
chrX	164990654	164991552	intron (NM_175027, intron 4 of 8)	intron (NM_175027, intron 4 of 8)	10511	NM_175027	237211	Mm.336317	NM_175027	ENSMUSG00000047757	Fancb	BC022692	Fanconi anemia, complementation group B	protein-coding
chr13	69744321	69745420	Intergenic	Intergenic	-4973	NM_001145162	76980	Mm.23960	NM_001145162	ENSMUSG00000052981	Ube2ql1	3110006E14Rik	ubiquitin-conjugating enzyme E2Q family-like 1	protein-coding
chr8	26597595	26598415	Intergenic	Intergenic	226418	NR_045904	72316	Mm.490534	NR_045904	ENSMUSG00000100335	2310008N11Rik	-	RIKEN cDNA 2310008N11 gene	ncRNA
chr18	79108436	79109011	intron (NM_053099, intron 1 of 5)	intron (NM_053099, intron 1 of 5)	668	NM_053099	240427	Mm.312871	NM_053099	ENSMUSG00000024548	Setbp1	C130092E12|Seb|mKIAA0437	SET binding protein 1	protein-coding
chr5	42382265	42383022	Intergenic	ORR1E|LTR|ERVL-MaLR	314683	NR_131130	433882	Mm.319353	NR_131130	ENSMUSG00000067285	Gm16223	EG433882	predicted gene 16223	ncRNA
chr12	83487045	83488046	intron (NM_001267625, intron 1 of 10)	CpG	191	NM_058212	70127	Mm.151308	NM_058212	ENSMUSG00000021221	Dpf3	2810403B03Rik|6530402L11Rik|BAF45C|C78788|CERD4|cer-d4	D4, zinc and double PHD fingers, family 3	protein-coding
chr5	114597002	114597659	intron (NM_001004180, intron 2 of 2)	intron (NM_001004180, intron 2 of 2)	29079	NM_001004180	433940	Mm.194212	NM_001004180	ENSMUSG00000041930	Fam222a	-	family with sequence similarity 222, member A	protein-coding
chr16	21908737	21909088	intron (NM_172821, intron 7 of 12)	intron (NM_172821, intron 7 of 12)	16943	NM_172821	71751	Mm.420837	NM_172821	ENSMUSG00000033618	Map3k13	C130026N12Rik|LZK	mitogen-activated protein kinase kinase kinase 13	protein-coding
chr1	151702824	151703483	intron (NM_022018, intron 9 of 13)	intron (NM_022018, intron 9 of 13)	51574	NR_151474	102640772		NR_151473	ENSMUSG00000100594	2810414N06Rik	-	RIKEN cDNA 2810414N06 gene	ncRNA
chr17	69103096	69103739	intron (NM_001355732, intron 1 of 21)	intron (NM_001355732, intron 1 of 21)	27740	NM_001355732	13823	Mm.131135	NM_013813	ENSMUSG00000024044	Epb41l3	4.1B|DAL1P|Dal1|Epb4.1l3|NBL3	erythrocyte membrane protein band 4.1 like 3	protein-coding
chr2	125519936	125520692	Intergenic	Intergenic	-13876	NM_007993	14118	Mm.271644	NM_007993	ENSMUSG00000027204	Fbn1	AI536462|B430209H23|Fib-1|Tsk	fibrillin 1	protein-coding
chr11	109170618	109171205	Intergenic	Intergenic	-26542	NR_037978	268498	Mm.227970	NM_001085512	ENSMUSG00000078605	E030025P04Rik	Gm664	RIKEN cDNA E030025P04 gene	ncRNA
chr13	37432523	37433295	Intergenic	Intergenic	87564	NM_010745	17084	Mm.2639	NM_010745	ENSMUSG00000021423	Ly86	MD-1|MD1|ly86_tv2	lymphocyte antigen 86	protein-coding
chr15	12050893	12051810	Intergenic	L1MB8|LINE|L1	-55344	NM_011294	20024	Mm.41746	NM_011294	ENSMUSG00000022205	Sub1	AI842364|P15|P9|Pc4|Rpo2tc1	SUB1 homolog, transcriptional regulator	protein-coding
chr10	85240665	85241303	Intergenic	Intergenic	-55930	NM_007771	12952	Mm.26237	NM_007771	ENSMUSG00000020038	Cry1	AU020726|AU021000|Phll1	cryptochrome 1 (photolyase-like)	protein-coding
chr6	136225901	136226109	Intergenic	(GAGAA)n|Simple_repeat|Simple_repeat	-52460	NM_008171	14812	Mm.436649	NM_008171	ENSMUSG00000030209	Grin2b	AW490526|GluN2B|GluRepsilon2|NR2B|Nmdar2b	glutamate receptor, ionotropic, NMDA2B (epsilon 2)	protein-coding
chr3	145923983	145924458	promoter-TSS (NM_009740)	promoter-TSS (NM_009740)	-42	NM_009740	12042	Mm.239141	NM_009740	ENSMUSG00000028191	Bcl10	AI132454|BCL-10|C81403|CARMEN|CIPER|CLAP|ME10|cE10	B cell leukemia/lymphoma 10	protein-coding
chr6	122845548	122846017	TTS (NM_021899)	TTS (NM_021899)	10375	NM_009779	12267	Mm.2408	NM_009779	ENSMUSG00000040552	C3ar1	AZ3B|C3AR|HNFAG09	complement component 3a receptor 1	protein-coding
chr5	149915398	149916128	Intergenic	Intergenic	68016	NR_045758	70969	Mm.78499	NR_045758	ENSMUSG00000107214	4930500F04Rik	4931407C17Rik	RIKEN cDNA 4930500F04 gene	ncRNA
chr14	121613495	121613983	intron (NM_001081039, intron 27 of 53)	intron (NM_001081039, intron 27 of 53)	84678	NM_001081039	105445	Mm.378591	NM_134074	ENSMUSG00000025558	Dock9	AA959601|AW538057|B230309H04Rik|D14Wsu89e|Zizimin1|mKIAA1058	dedicator of cytokinesis 9	protein-coding
chr4	153869008	153869421	Intergenic	Intergenic	81262	NR_040670	407793	Mm.260950	NR_040670		BC039966	-	cDNA sequence BC039966	ncRNA
chr13	8631075	8631377	intron (NM_052977, intron 3 of 9)	intron (NM_052977, intron 3 of 9)	239818	NM_001039389	207615	Mm.284654	NM_172445	ENSMUSG00000021147	Wdr37	-	WD repeat domain 37	protein-coding
chr3	5860346	5860805	Intergenic	LSU-rRNA_Hsa|rRNA|rRNA	-284327	NM_008994	19302	Mm.132336	NM_008994	ENSMUSG00000040374	Pex2	D3Ertd138e|PAF-1|PMP35|Pxmp3	peroxisomal biogenesis factor 2	protein-coding
chr2	145623079	145623605	intron (NM_053195, intron 15 of 16)	intron (NM_053195, intron 15 of 16)	-68360	NM_001037929	627302	Mm.445953	NM_001037929		Gm14092	-	predicted gene 14092	protein-coding
chr5	67155608	67155973	Intergenic	(CCCCAG)n|Simple_repeat|Simple_repeat	-56664	NM_008888	18935	Mm.62505	NM_008888	ENSMUSG00000012520	Phox2b	Dilp1|NBPhox|Pmx2b|Px2b	paired-like homeobox 2b	protein-coding
chr6	105526879	105527169	Intergenic	(TA)n|Simple_repeat|Simple_repeat	-34356	NR_040297	100503536	Mm.366960	NR_040297	ENSMUSG00000108237	Gm19757	-	predicted gene, 19757	ncRNA
chr11	50336067	50336741	Intergenic	Intergenic	-10731	NM_001110500	12330	Mm.248827	NM_007597	ENSMUSG00000020368	Canx	1110069N15Rik|AI988026|Cnx|D11Ertd153e	calnexin	protein-coding
chr2	91952236	91952959	intron (NM_138306, intron 1 of 30)	Charlie1a|DNA|hAT-Charlie	-2249	NM_001166597	104418	Mm.314923	NM_138306	ENSMUSG00000040479	Dgkz	E130307B02Rik|F730209L11Rik|mDGK[z]	diacylglycerol kinase zeta	protein-coding
chr10	120406060	120406636	intron (NM_010441, intron 3 of 4)	intron (NM_010441, intron 3 of 4)	16825	NR_040626	320626	Mm.446091	NR_040626	ENSMUSG00000090191	9230105E05Rik	-	RIKEN cDNA 9230105E05 gene	ncRNA
chr8	108525719	108526314	Intergenic	Intergenic	58661	NR_077224	109215	Mm.65282	NR_077224	ENSMUSG00000110613	Lncbate1	3010033K07Rik|Lnc-BATE1	brown adipose tissue enriched long non-coding RNA 1	ncRNA
chr8	127144680	127145445	intron (NM_001363431, intron 1 of 24)	MTC|LTR|ERVL-MaLR	81006	NM_001309392	93742	Mm.299254	NM_033620	ENSMUSG00000025812	Pard3	AA960621|AI256638|Asip|D8Ertd580e|Par-3|Par3|Pard-3|Pard3a|Phip	par-3 family cell polarity regulator	protein-coding
chr10	75142921	75143671	intron (NM_001081412, intron 7 of 22)	intron (NM_001081412, intron 7 of 22)	-68777	NM_153406	74392	Mm.27716	NM_153406	ENSMUSG00000033444	Specc1l	4930470P14Rik|4932439K10Rik|9530057A13Rik|AI317249|Cytsa|mKIAA0376	sperm antigen with calponin homology and coiled-coil domains 1-like	protein-coding
chr2	173938379	173939208	Intergenic	Intergenic	-137509	NM_001363030	228960	Mm.277977	NM_172675	ENSMUSG00000027522	Stx16	4930401D03|5430410K23Rik|6330500A18Rik|AI648908|AW553605|Syn16	syntaxin 16	protein-coding
chr11	110472849	110473313	intron (NM_001356345, intron 1 of 10)	intron (NM_001356345, intron 1 of 10)	-5434	NM_001356347	26399	Mm.14487	NM_011943	ENSMUSG00000020623	Map2k6	MAPKK 6|MAPKK6|MEK6|MKK6|Prkmk6|SAPKK3	mitogen-activated protein kinase kinase 6	protein-coding
chr7	129673268	129673913	Intergenic	MTEa|LTR|ERVL-MaLR	81727	NM_172255	207425	Mm.229323	NM_172255	ENSMUSG00000042055	Wdr11	2900055P10Rik|AW489876|Brwd2|mKIAA1351	WD repeat domain 11	protein-coding
chr9	74350261	74351015	Intergenic	Intergenic	240304	NM_001033500	546144	Mm.335289	NM_177908	ENSMUSG00000044976	Wdr72	AW558070|D230040E23	WD repeat domain 72	protein-coding
chr4	153768152	153768979	Intergenic	MER21B|LTR|ERVL	181911	NR_040670	407793	Mm.260950	NR_040670		BC039966	-	cDNA sequence BC039966	ncRNA
chr1	80244677	80245067	Intergenic	Intergenic	-30928	NM_173425	241128	Mm.145511	NM_173425	ENSMUSG00000043230	Fam124b	A830043J08Rik	family with sequence similarity 124, member B	protein-coding
chr16	47474865	47475057	Intergenic	(GAGAA)n|Simple_repeat|Simple_repeat	683538	NR_152166	619300	Mm.384092	NR_152166		6430553K19Rik	-	RIKEN cDNA 6430553K19 gene	ncRNA
chr13	43327206	43328171	Intergenic	Intergenic	-23516	NM_001033399	328232	Mm.441399	NM_001033399	ENSMUSG00000051335	Gfod1	9630032O13|AI850995	glucose-fructose oxidoreductase domain containing 1	protein-coding
chr10	110911419	110911707	Intergenic	(TCTTG)n|Simple_repeat|Simple_repeat	-8613	NM_007792	13008	Mm.2020	NM_007792	ENSMUSG00000020186	Csrp2	AW551867|Crp2|SmLim	cysteine and glycine-rich protein 2	protein-coding
chr10	64072807	64073866	intron (NM_178678, intron 2 of 2)	MTE2a|LTR|ERVL-MaLR	16919	NM_178678	216028	Mm.431318	NM_178678	ENSMUSG00000042846	Lrrtm3	9630044H04Rik	leucine rich repeat transmembrane neuronal 3	protein-coding
chr7	130154010	130154208	Intergenic	(GAGAA)n|Simple_repeat|Simple_repeat	112699	NM_001347638	14183	Mm.16340	NM_010207	ENSMUSG00000030849	Fgfr2	AU043015|AW556123|Bek|Fgfr-2|Fgfr-7|Fgfr7|KGFR|KGFRTr|svs	fibroblast growth factor receptor 2	protein-coding
chr4	105354157	105354538	Intergenic	MTE2a|LTR|ERVL-MaLR	197000	NM_080555	67916	Mm.348326	NM_080555	ENSMUSG00000028517	Plpp3	1110003O22Rik|2610002D05Rik|AV025606|D4Bwg0538e|D4Bwg1535e|Lpp3|PRG-2|Ppab2b|Ppap2b	phospholipid phosphatase 3	protein-coding
chr9	73456028	73456736	Intergenic	Intergenic	342913	NM_198609	225215	Mm.379366	NM_198609	ENSMUSG00000032215	Rsl24d1	2410159K22Rik	ribosomal L24 domain containing 1	protein-coding
chr11	57799307	57799956	intron (NR_131042, intron 1 of 3)	intron (NR_131042, intron 1 of 3)	1836	NR_131042	76516	Mm.28485	NR_131042	ENSMUSG00000087165	2010001A14Rik	-	RIKEN cDNA 2010001A14 gene	ncRNA
chr2	18995774	18996193	intron (NM_001355149, intron 1 of 10)	intron (NM_001355149, intron 1 of 10)	2138	NM_008845	18718	Mm.313977	NM_008845	ENSMUSG00000026737	Pip4k2a	AW742916|Pip5k2a	phosphatidylinositol-5-phosphate 4-kinase, type II, alpha	protein-coding
chr5	131623196	131623691	intron (NM_001363480, intron 5 of 19)	ZP3AR|Satellite|Satellite	-208725	NR_152164	545809	Mm.357553	NR_152164	ENSMUSG00000105387	Gm29681	Gm42590	predicted gene, 29681	ncRNA
chr9	103660543	103661169	intron (NM_178638, intron 2 of 5)	intron (NM_178638, intron 2 of 5)	31951	NM_001359465	81907	Mm.384704	NM_178638	ENSMUSG00000042757	Tmem108	AI462967|B130017P16Rik|R74726	transmembrane protein 108	protein-coding
chr4	154382378	154383272	intron (NM_027504, intron 3 of 16)	intron (NM_027504, intron 3 of 16)	-82930	NM_001112744	230972	Mm.38481	NM_001112744	ENSMUSG00000029032	Arhgef16	-	Rho guanine nucleotide exchange factor (GEF) 16	protein-coding
chr5	41774643	41775026	Intergenic	Intergenic	-10614	NM_007524	12020	Mm.2530	NM_007524	ENSMUSG00000049691	Nkx3-2	Bapx1|NKX3.2|Nkx-3.2	NK3 homeobox 2	protein-coding
chr14	25435182	25435664	Intergenic	L1MCa|LINE|L1	-23762	NM_001310666	328365	Mm.227484	NM_183208	ENSMUSG00000007817	Zmiz1	BC065120|E330020C23|Gm10397|I920194n01|Rai17|Zimp10	zinc finger, MIZ-type containing 1	protein-coding
chr5	118021200	118022118	Intergenic	Intergenic	-6084	NM_021344	57816	Mm.273285	NM_021344	ENSMUSG00000029359	Tesc	1010001A17Rik|2410011K10Rik|TE-1	tescalcin	protein-coding
chr8	126456400	126456861	intron (NM_001159907, intron 8 of 29)	intron (NM_001159907, intron 8 of 29)	18435	NM_001159907	212728	Mm.482479	NM_001159907	ENSMUSG00000090290	Tarbp1	Gm17296|Gm179	TAR RNA binding protein 1	protein-coding
chr19	4033552	4034375	Intergenic	Intergenic	3949	NM_013541	14870	Mm.299292	NM_013541	ENSMUSG00000060803	Gstp1	GstpiB	glutathione S-transferase, pi 1	protein-coding
chr6	50440890	50441597	intron (NM_001347213, intron 1 of 23)	intron (NM_001347213, intron 1 of 23)	14927	NM_001163645	71720	Mm.44153	NM_027881	ENSMUSG00000029822	Osbpl3	1200014M06Rik|6720421I08Rik|A530055M08|ORP-3|ORP3|OSBP3	oxysterol binding protein-like 3	protein-coding
chr8	4220387	4221167	Intergenic	RSINE1|SINE|B4	-3465	NM_207203	73072	Mm.477379	NM_207203	ENSMUSG00000064125	Prr36	-	proline rich 36	protein-coding
chr10	53636350	53636744	intron (NM_001081428, intron 16 of 17)	intron (NM_001081428, intron 16 of 17)	-6590	NM_027830	71567	Mm.278221	NM_027830	ENSMUSG00000058298	Mcm9	9030408O17Rik|Gm235|Mcmdc1	minichromosome maintenance 9 homologous recombination repair factor	protein-coding
chr8	14615588	14616442	intron (NM_001145965, intron 3 of 14)	intron (NM_001145965, intron 3 of 14)	-272521	NM_012000	26889	Mm.254027	NM_012000	ENSMUSG00000026317	Cln8	mnd	ceroid-lipofuscinosis, neuronal 8	protein-coding
chr4	137037477	137038408	intron (NM_198248, intron 1 of 18)	intron (NM_198248, intron 1 of 18)	10753	NM_198248	230848	Mm.31068	NM_198248	ENSMUSG00000060862	Zbtb40	BC059177|C230087D24|Gm571|mKIAA0478	zinc finger and BTB domain containing 40	protein-coding
chr1	189119020	189119578	Intergenic	Intergenic	-111459	NM_172650	226823	Mm.209880	NM_172650	ENSMUSG00000026608	Kctd3	4930438A20Rik|9330185B06|E330032J19Rik|NY-REN-45	potassium channel tetramerisation domain containing 3	protein-coding
chr7	46556152	46556353	intron (NM_013789, intron 9 of 10)	(GAGAA)n|Simple_repeat|Simple_repeat	83555	NM_013789	27414	Mm.76659	NM_013789	ENSMUSG00000030839	Sergef	DelGEF|Gef|Gnef|Gnefr	secretion regulating guanine nucleotide exchange factor	protein-coding
chr2	180331738	180332412	promoter-TSS (NR_045877)	promoter-TSS (NR_045877)	-782	NR_045877	100036520	Mm.98950	NR_045877	ENSMUSG00000056061	Gata5os	Gm14318	GATA binding protein 5, opposite strand	ncRNA
chr7	38028813	38029488	Intergenic	Intergenic	-9598	NM_011274	19777	Mm.387220	NM_011274	ENSMUSG00000030421	Uri1	C80913|NNX3|Rmp	URI1, prefoldin-like chaperone	protein-coding
chr8	25276748	25277472	Intergenic	Intergenic	29160	NR_040352	74489	Mm.256468	NR_040352	ENSMUSG00000110140	5430421F17Rik	-	RIKEN cDNA 5430421F17 gene	ncRNA
chr10	121832522	121833214	intron (NM_001081037, intron 10 of 21)	intron (NM_001081037, intron 10 of 21)	92938	NM_001359720	270802	Mm.209172	NM_173022	ENSMUSG00000053684	BC048403	E030027L10	cDNA sequence BC048403	protein-coding
chr19	57187015	57187617	intron (NM_001362445, intron 1 of 20)	intron (NM_001362445, intron 1 of 20)	10315	NM_001290815	226251	Mm.217161	NM_178688	ENSMUSG00000025085	Ablim1	2210411C18Rik|2610209L21Rik|4833406P10Rik|9330196J19Rik|AV079770|AW060987|AW215784|Limab1|mKIAA0059	actin-binding LIM protein 1	protein-coding
chr10	25552319	25552981	intron (NR_136909, intron 2 of 3)	intron (NR_136909, intron 2 of 3)	16264	NR_136909	102640597	Mm.412041	NR_136909	ENSMUSG00000101537	Gm29571	-	predicted gene 29571	ncRNA
chr6	65042584	65043937	promoter-TSS (NM_001253392)	promoter-TSS (NM_001253392)	54	NM_001253392	13990	Mm.99113	NM_007958	ENSMUSG00000029920	Smarcad1	AV081750|AW226546|D6Pas1|Etl1|etl-1|mKIAA1122	SWI/SNF-related, matrix-associated actin-dependent regulator of chromatin, subfamily a, containing DEAD/H box 1	protein-coding
chrX	76598612	76599124	intron (NM_001201395, intron 1 of 1)	SYNREP_MM|Satellite|Satellite	4056	NM_001201395	74987	Mm.107996	NM_001201395	ENSMUSG00000079525	Cldn34d	4930468A15Rik	claudin 34D	protein-coding
chr14	122382135	122382727	intron (NM_029556, intron 6 of 7)	intron (NM_029556, intron 6 of 7)	68684	NR_033325	328479	Mm.86095	NR_033325	ENSMUSG00000064052	Gm5089	6530402A20|C030005G22Rik|EG328479	predicted gene 5089	ncRNA
chr5	66273579	66274434	intron (NM_027602, intron 3 of 11)	intron (NM_027602, intron 3 of 11)	13165	NM_027602	70918	Mm.23166	NM_027602	ENSMUSG00000029206	Nsun7	4921525L17Rik	NOL1/NOP2/Sun domain family, member 7	protein-coding
chr15	95858978	95859612	intron (NM_001253813, intron 2 of 20)	intron (NM_001253813, intron 2 of 20)	-29223	NR_155277	102634389	Mm.440563	NR_155276	ENSMUSG00000078648	LOC102634389	-	uncharacterized LOC102634389	ncRNA
chr5	148169745	148170446	intron (NM_001359503, intron 4 of 14)	Charlie8|DNA|hAT-Charlie	-95122	NM_001359511	77521	Mm.244177	NM_029920	ENSMUSG00000029651	Mtus2	5730592G18Rik|A730013O20Rik|AU067634|C130038G02Rik|Cazip|Gm763|mKIAA0774	microtubule associated tumor suppressor candidate 2	protein-coding
chr5	73073826	73074674	intron (NM_028194, intron 39 of 62)	intron (NM_028194, intron 39 of 62)	67346	NM_173403	231290	Mm.491387	NM_173403	ENSMUSG00000029219	Slc10a4	E130304D01	solute carrier family 10 (sodium/bile acid cotransporter family), member 4	protein-coding
chr17	32870154	32871044	Intergenic	Intergenic	21004	NM_207245	240066	Mm.26636	NM_207245	ENSMUSG00000095325	Zfp870	AI173952	zinc finger protein 870	protein-coding
chr13	56482639	56483647	promoter-TSS (NM_008373)	promoter-TSS (NM_008373)	-886	NM_008373	16198	Mm.3006	NM_008373	ENSMUSG00000021538	Il9	Il-9|P40	interleukin 9	protein-coding
chr18	84903337	84904013	Intergenic	Intergenic	-31350	NM_015798	50764	Mm.28369	NM_015798	ENSMUSG00000034391	Fbxo15	AU019763|Fbx15|ecat3	F-box protein 15	protein-coding
chr16	4386577	4387208	intron (NM_009624, intron 2 of 10)	intron (NM_009624, intron 2 of 10)	33606	NM_009624	11515	Mm.439750	NM_009624	ENSMUSG00000005580	Adcy9	AC9|ACtp10|AW125421|D16Wsu65e|mKIAA0520	adenylate cyclase 9	protein-coding
chr12	69674356	69675322	intron (NM_001135559, intron 1 of 22)	intron (NM_001135559, intron 1 of 22)	7013	NM_001135559	20663	Mm.3770	NM_001135559	ENSMUSG00000034801	Sos2	SOS-2|mSOS-2	SOS Ras/Rho guanine nucleotide exchange factor 2	protein-coding
chr9	91582962	91583393	Intergenic	MTD|LTR|ERVL-MaLR	214205	NM_009576	22774	Mm.8062	NM_009576	ENSMUSG00000036972	Zic4	-	zinc finger protein of the cerebellum 4	protein-coding
chr8	48159324	48160181	Intergenic	ORR1E|LTR|ERVL-MaLR	49739	NM_001161515	320685	Mm.121549	NM_178788	ENSMUSG00000031562	Dctd	6030466N05Rik	dCMP deaminase	protein-coding
chr8	124217030	124217836	Intergenic	B1F2|SINE|Alu	-13961	NM_139272	108148	Mm.33808	NM_139272	ENSMUSG00000089704	Galnt2	AI480629	polypeptide N-acetylgalactosaminyltransferase 2	protein-coding
chr1	91911756	91912751	Intergenic	Intergenic	110792	NM_007855	13345	Mm.9474	NM_007855	ENSMUSG00000007805	Twist2	Dermo1|bHLHa39	twist basic helix-loop-helix transcription factor 2	protein-coding
chr14	78256893	78257451	Intergenic	(TA)n|Simple_repeat|Simple_repeat	50871	NM_011613	21943	Mm.249221	NM_011613	ENSMUSG00000022015	Tnfsf11	Ly109l|ODF|OPGL|RANKL|Trance	tumor necrosis factor (ligand) superfamily, member 11	protein-coding
chr1	156284798	156285627	intron (NM_001134741, intron 8 of 17)	intron (NM_001134741, intron 8 of 17)	18136	NM_001134741	214575	Mm.252800	NM_001134741	ENSMUSG00000060985	Tdrd5	Gm103	tudor domain containing 5	protein-coding
chr4	154055481	154055870	TTS (NM_011642)	TTS (NM_011642)	-12998	NM_001033455	381580	Mm.51001	NM_001033455	ENSMUSG00000039492	Ccdc27	Gm1035	coiled-coil domain containing 27	protein-coding
chr17	14861593	14862322	intron (NM_175173, intron 23 of 24)	intron (NM_175173, intron 23 of 24)	81167	NM_175173	71682	Mm.122698	NM_175173	ENSMUSG00000046991	Wdr27	0610012K18Rik	WD repeat domain 27	protein-coding
chr5	102728698	102729523	intron (NM_029270, intron 3 of 9)	intron (NM_029270, intron 3 of 9)	-39700	NM_001286468	231532	Mm.440191	NM_029270	ENSMUSG00000057315	Arhgap24	0610025G21Rik	Rho GTPase activating protein 24	protein-coding
chr10	19176394	19177039	intron (NR_038022, intron 1 of 1)	intron (NR_038022, intron 1 of 1)	9478	NR_038022	100504265	Mm.383417	NR_038021		Gm20139	-	predicted gene, 20139	ncRNA
chr17	47555186	47555578	intron (NM_001081635, intron 1 of 6)	B1_Mm|SINE|Alu	-38085	NM_007632	12445	Mm.27291	NM_007632	ENSMUSG00000034165	Ccnd3	9230106B05Rik|AA682053|AL024085|AW146355|C78795	cyclin D3	protein-coding
chr10	18352811	18353208	Intergenic	ORR1E|LTR|ERVL-MaLR	-54666	NM_173390	215819	Mm.297971	NM_173390	ENSMUSG00000039835	Nhsl1	5730409E15Rik|A630035H13Rik|A730096F01|BC013565|D10Bwg0940e|mKIAA1357	NHS-like 1	protein-coding
chr18	68889054	68889662	TTS (NR_038051)	TTS (NR_038051)	62170	NR_038051	78931	Mm.160155	NR_038051	ENSMUSG00000024546	4930546C10Rik	-	RIKEN cDNA 4930546C10 gene	ncRNA
chr5	58349280	58349513	Intergenic	(TTCTC)n|Simple_repeat|Simple_repeat	103602	NR_046190	78163	Mm.243828	NR_046190	ENSMUSG00000105234	4930459L07Rik	-	RIKEN cDNA 4930459L07 gene	ncRNA
chr14	70149885	70150557	intron (NM_146055, intron 7 of 20)	B4A|SINE|B4	3570	NM_146055	219158	Mm.218284	NM_146055	ENSMUSG00000033712	Ccar2	2610301G19Rik|Dbc1|mKIAA1967	cell cycle activator and apoptosis regulator 2	protein-coding
chr8	18785344	18786076	intron (NM_173189, intron 12 of 13)	intron (NM_173189, intron 12 of 13)	-44148	NM_007426	11601	Mm.439874	NM_007426	ENSMUSG00000031465	Angpt2	Agpt2|Ang-2|Ang2	angiopoietin 2	protein-coding
chr1	179448521	179449422	intron (NM_027188, intron 1 of 11)	intron (NM_027188, intron 1 of 11)	69070	NM_027188	69726	Mm.222338	NM_027188	ENSMUSG00000055067	Smyd3	2410008A19Rik|Zmynd1	SET and MYND domain containing 3	protein-coding
chr2	160438305	160438496	Intergenic	(TCTTG)n|Simple_repeat|Simple_repeat	-71335	NM_010658	16658	Mm.330745	NM_010658	ENSMUSG00000074622	Mafb	Kreisler|Krml|Krml1|kr	v-maf musculoaponeurotic fibrosarcoma oncogene family, protein B (avian)	protein-coding
chr6	3182835	3183586	Intergenic	Intergenic	-105309	NR_036696	667335	Mm.380219	NR_036696	ENSMUSG00000106779	Gm8579	EG667335	spermatogenesis associated glutamate (E)-rich protein 4a pseudogene	pseudo
chr12	111737924	111738592	intron (NM_001163388, intron 4 of 5)	intron (NM_001163388, intron 4 of 5)	-20591	NM_008450	16593	Mm.278357	NM_008450	ENSMUSG00000021288	Klc1	AI874768|Kns2	kinesin light chain 1	protein-coding
chr16	44305618	44306278	intron (NM_198034, intron 1 of 24)	intron (NM_198034, intron 1 of 24)	26890	NM_198034	320007	Mm.242144	NM_198034	ENSMUSG00000022696	Sidt1	AW045928|B830021E24Rik	SID1 transmembrane family, member 1	protein-coding
chr1	92298440	92299226	Intergenic	MTE2b|LTR|ERVL-MaLR	-118492	NM_207225	208727	Mm.318567	NM_207225	ENSMUSG00000026313	Hdac4	4932408F19Rik|HD4	histone deacetylase 4	protein-coding
chr11	113454975	113455578	intron (NM_027216, intron 5 of 9)	intron (NM_027216, intron 5 of 9)	110539	NM_001362940	69806	Mm.341021	NM_027216	ENSMUSG00000041654	Slc39a11	1810074D23Rik|ZIP-11	solute carrier family 39 (metal ion transporter), member 11	protein-coding
chr19	47219937	47220984	intron (NM_021360, intron 1 of 5)	(CACAT)n|Simple_repeat|Simple_repeat	-8383	NM_001163480	18011	Mm.313651	NM_021360	ENSMUSG00000006435	Neurl1a	2410129E16Rik|AI450910|AI481072|Neu1|Neur1|Neurl|Neurl1|Nlz|Rnf67	neuralized E3 ubiquitin protein ligase 1A	protein-coding
chr9	69223698	69224498	intron (NM_013646, intron 2 of 10)	intron (NM_013646, intron 2 of 10)	-65743	NM_001289916	19883	Mm.378450	NM_013646	ENSMUSG00000032238	Rora	9530021D13Rik|Nr1f1|ROR1|ROR2|ROR3|nmf267|sg|staggerer|tmgc26	RAR-related orphan receptor alpha	protein-coding
chr1	106272133	106272528	intron (NM_133821, intron 1 of 16)	intron (NM_133821, intron 1 of 16)	100461	NM_133821	98432	Mm.24115	NM_133821	ENSMUSG00000044340	Phlpp1	AI836256|Phlpp|Plekhe1|SCOP|mKIAA0606	PH domain and leucine rich repeat protein phosphatase 1	protein-coding
chr7	48991264	48991551	intron (NM_001111016, intron 2 of 38)	intron (NM_001111016, intron 2 of 38)	32334	NM_001111016	78286	Mm.333881	NM_175272	ENSMUSG00000052512	Nav2	5330421F07Rik|AU067780|BQ960892|HELAD1|POMFIL2|RAINB1|RAINB2|Unc53H2|mKIAA3015	neuron navigator 2	protein-coding
chr1	170657525	170658134	intron (NM_177068, intron 3 of 7)	intron (NM_177068, intron 3 of 7)	13297	NM_177068	320078	Mm.287131	NM_177068	ENSMUSG00000038463	Olfml2b	1110018N05Rik|4832415H08Rik|AI467542	olfactomedin-like 2B	protein-coding
chr13	54158533	54159276	Intergenic	Intergenic	-33225	NM_001010973	15466	Mm.57243	NM_008286	ENSMUSG00000034987	Hrh2	H2R|HH2R	histamine receptor H2	protein-coding
chr18	81051900	81052387	Intergenic	Intergenic	-65122	NM_178280	20689	Mm.215917	NM_178280	ENSMUSG00000024565	Sall3	B130022O04Rik|Msal|Msal-1|Sal|Salt|Spalt	spalt like transcription factor 3	protein-coding
chr8	118521432	118522307	intron (NM_019707, intron 2 of 13)	ORR1E|LTR|ERVL-MaLR	238258	NM_019707	12554	Mm.334841	NM_019707	ENSMUSG00000031841	Cdh13	4932416G01Rik|Cdht|Tcad	cadherin 13	protein-coding
chr17	68601594	68602162	intron (NM_177278, intron 14 of 20)	intron (NM_177278, intron 14 of 20)	-235258	NM_001206661	622645	Mm.86422	NM_001206661	ENSMUSG00000095407	Tmem200c	EG622645|Gm6338	transmembrane protein 200C	protein-coding
chr1	38589416	38590050	intron (NM_001290814, intron 1 of 21)	intron (NM_001290814, intron 1 of 21)	37511	NM_001290814	16764	Mm.336679	NM_010678	ENSMUSG00000037138	Aff3	3222402O04Rik|A730046J16|LAF-4|Laf4	AF4/FMR2 family, member 3	protein-coding
chr9	60267877	60269004	intron (NM_001040426, intron 6 of 17)	intron (NM_001040426, intron 6 of 17)	-127220	NM_172444	207596	Mm.28791	NM_172444	ENSMUSG00000032289	Thsd4	ADAMTSL-6|ADAMTSL6|AI585901|Adamtsl4|B230114P05Rik	thrombospondin, type I, domain containing 4	protein-coding
chr15	30393684	30394274	intron (NM_008729, intron 2 of 22)	MTEb|LTR|ERVL-MaLR	221445	NM_001355502	18163	Mm.321648	NM_008729	ENSMUSG00000022240	Ctnnd2	Catnd2|Nprap|neurojugin	catenin (cadherin associated protein), delta 2	protein-coding
chr18	36274682	36275353	Intergenic	Intergenic	-6088	NM_008989	19290	Mm.44643	NM_008989	ENSMUSG00000043991	Pura	6330411E07Rik|CAGER-1|Pur-alpha|ssCRE-BP	purine rich element binding protein A	protein-coding
chr5	150370790	150371209	intron (NM_172887, intron 13 of 60)	intron (NM_172887, intron 13 of 60)	111069	NM_172887	320365	Mm.216590	NM_172887	ENSMUSG00000056602	Fry	13CDNA73|9330186A19Rik|AF346502|AI462658|C87180|D930046M03|cg003|mKIAA4143	FRY microtubule binding protein	protein-coding
chr2	181105340	181106285	intron (NM_001003824, intron 7 of 16)	L1MB5|LINE|L1	29477	NM_001006669	16536	Mm.40615	NM_010611	ENSMUSG00000016346	Kcnq2	HNSPC|KQT2|Nmf134	potassium voltage-gated channel, subfamily Q, member 2	protein-coding
chr11	97284200	97284661	Intergenic	ID_B1|SINE|B4	-3854	NM_008942	19155	Mm.29824	NM_008942	ENSMUSG00000001441	Npepps	AAP-S|MP100|Psa|R74825|goku	aminopeptidase puromycin sensitive	protein-coding
chr18	66376435	66377251	Intergenic	Intergenic	-81761	NM_021451	58801	Mm.271878	NM_021451	ENSMUSG00000024521	Pmaip1	Noxa	phorbol-12-myristate-13-acetate-induced protein 1	protein-coding
chr17	74558340	74558811	intron (NM_007566, intron 4 of 72)	intron (NM_007566, intron 4 of 72)	30280	NM_007566	12211	Mm.442564	NM_007566	ENSMUSG00000024073	Birc6	A430032G04Rik|A430040A19Rik|AA501170|Bruce|D630005A10Rik|mKIAA1289	baculoviral IAP repeat-containing 6	protein-coding
chr12	17747672	17748192	intron (NM_016677, intron 1 of 3)	intron (NM_016677, intron 1 of 3)	57123	NM_016677	53602	Mm.313619	NM_016677	ENSMUSG00000071379	Hpcal1	NVL-3|NVP-3|Nvp3|VILIP3|Vnsl3|Vsnl3	hippocalcin-like 1	protein-coding
chr16	93518741	93519540	Intergenic	Lx8|LINE|L1	-60268	NR_040494	72264	Mm.396204	NR_040494	ENSMUSG00000099968	1700029J03Rik	-	RIKEN cDNA 1700029J03 gene	ncRNA
chr4	58077307	58078128	intron (NM_022814, intron 36 of 47)	intron (NM_022814, intron 36 of 47)	-68591	NM_026132	67402	Mm.87357	NM_026132	ENSMUSG00000038709	Txndc8	4930429J24Rik|Sptrx-3|Sptrx3|Trx6	thioredoxin domain containing 8	protein-coding
chr14	30023943	30024545	intron (NM_175343, intron 1 of 7)	(TC)n|Simple_repeat|Simple_repeat	1611	NM_175343	218865	Mm.259916	NM_172264	ENSMUSG00000015970	Chdh	AU041472|D630034H06Rik	choline dehydrogenase	protein-coding
chr15	27647851	27648638	Intergenic	Intergenic	-17551	NM_001013792	432940	Mm.309164	NM_001013792	ENSMUSG00000046034	Otulin	C79097|Fam105b|m3Sapc|m7-1Sapc	OTU deubiquitinase with linear linkage specificity	protein-coding
chr10	120716111	120716920	Intergenic	Intergenic	-49217	NR_038000	70874	Mm.427286	NR_038000	ENSMUSG00000044544	4921513I03Rik	-	RIKEN cDNA 4921513I03 gene	ncRNA
chr3	84114382	84115195	intron (NM_029797, intron 5 of 7)	intron (NM_029797, intron 5 of 7)	40998	NM_029797	76915	Mm.274829	NM_029797	ENSMUSG00000033752	Mnd1	2610034E18Rik|AI591601|Gaj	meiotic nuclear divisions 1	protein-coding
chr8	40441509	40442392	intron (NM_001357249, intron 1 of 12)	intron (NM_001357249, intron 1 of 12)	18135	NM_001357249	70546	Mm.34326	NM_178395	ENSMUSG00000039470	Zdhhc2	5730415P04Rik|6430583A19Rik|DHHC-2	zinc finger, DHHC domain containing 2	protein-coding
chr1	132683981	132684643	intron (NM_182716, intron 1 of 29)	MTE2b|LTR|ERVL-MaLR	23014	NM_001160318	269116	Mm.326702	NM_182716	ENSMUSG00000026442	Nfasc	AA387016|D430023G06Rik|NF|mKIAA0756	neurofascin	protein-coding
chr3	152478924	152479362	intron (NM_001081277, intron 11 of 13)	intron (NM_001081277, intron 11 of 13)	82459	NM_001287139	108946	Mm.379292	NM_198416	ENSMUSG00000039068	Zzz3	3110065C23Rik|6430567E01Rik|AA408566|AI481057|AW556059|R75514	zinc finger, ZZ domain containing 3	protein-coding
chr5	45823467	45823930	intron (NM_001359871, intron 1 of 5)	Lx8|LINE|L1	32854	NM_001359872	209707	Mm.71498	NM_172153	ENSMUSG00000015882	Lcorl	Mlr1	ligand dependent nuclear receptor corepressor-like	protein-coding
chr13	25028381	25029056	Intergenic	Intergenic	-8401	NM_001013389	380836	Mm.387097	NM_001013389	ENSMUSG00000021339	Mrs2	Gm902|HPT|Mrs2l|RPT	MRS2 magnesium transporter	protein-coding
chr18	68033157	68034263	intron (NM_172631, intron 1 of 5)	intron (NM_172631, intron 1 of 5)	100537	NM_172631	52662	Mm.440183	NM_172631	ENSMUSG00000024544	Ldlrad4	8230401C20Rik|A430083H02|A430108L08Rik|C18orf1|D18Ertd653e|D330030L18Rik	low density lipoprotein receptor class A domain containing 4	protein-coding
chr11	115162575	115163484	promoter-TSS (NM_012030)	promoter-TSS (NM_012030)	-312	NM_012030	26941	Mm.27842	NM_012030	ENSMUSG00000020733	Slc9a3r1	EBP-50|NHE-RF|NHERF-1|NHERF1	solute carrier family 9 (sodium/hydrogen exchanger), member 3 regulator 1	protein-coding
chr17	26346756	26347475	Intergenic	Intergenic	-67744	NM_001081656	240055	Mm.133211	NM_001081656	ENSMUSG00000034413	Neurl1b	C230078M08Rik|EG240055	neuralized E3 ubiquitin protein ligase 1B	protein-coding
chr1	78580732	78580974	Intergenic	(GAGAA)n|Simple_repeat|Simple_repeat	69793	NM_026713	68393	Mm.41325	NM_026713	ENSMUSG00000012187	Mogat1	0610030A14Rik|1110064N14Rik|Dgat2l|Dgat2l1|MGAT1|WI1-2612I11.1|mDC2	monoacylglycerol O-acyltransferase 1	protein-coding
chr11	86840693	86841298	Intergenic	Intergenic	11663	NR_162780	114483630		NR_162780		Mir12182	mmu-mir-12182	microRNA mir-12182	ncRNA
chr9	83688464	83688695	Intergenic	(CTAGGG)n|Simple_repeat|Simple_repeat	-2896	NR_046066	100039222	Mm.405596	NR_046066	ENSMUSG00000100155	Gm2109	-	predicted gene 2109	ncRNA
chr8	124599858	124600495	intron (NM_023709, intron 6 of 19)	intron (NM_023709, intron 6 of 19)	24065	NM_023709	73647	Mm.6209	NM_023709	ENSMUSG00000031981	Capn9	2200003B16Rik|GC36|nCL-4|nCL4	calpain 9	protein-coding
chr7	64856639	64857107	intron (NM_183087, intron 2 of 9)	intron (NM_183087, intron 2 of 9)	16167	NM_023239	66647	Mm.19944	NM_023239	ENSMUSG00000070520	Nsmce3	5730494G16Rik|AI642138|BB044375|HCA4|Mageg1|Ndnl2|mage-g1	NSE3 homolog, SMC5-SMC6 complex component	protein-coding
chr13	52750483	52751265	intron (NR_027893, intron 1 of 2)	intron (NR_027893, intron 1 of 2)	6331	NR_027893	105404	Mm.184173	NR_027893		BB123696	-	expressed sequence BB123696	ncRNA
chr13	54622152	54622767	intron (NM_178397, intron 1 of 10)	intron (NM_178397, intron 1 of 10)	675	NM_178397	76577	Mm.194459	NM_178397	ENSMUSG00000025873	Faf2	2210404D11Rik|AI462440|Ubxd8|mKIAA0887	Fas associated factor family member 2	protein-coding
chr5	141849570	141850175	intron (NM_177879, intron 5 of 44)	MTE2a|LTR|ERVL-MaLR	-551625	NM_199068	17425	Mm.24214	NM_010812	ENSMUSG00000056493	Foxk1	A630048H08Rik|AI463295|Gm10868|Mnf	forkhead box K1	protein-coding
chr4	155983752	155984516	Intergenic	MurERV4-int|LTR|ERVK	8544	NM_080445	117592	Mm.440185	NM_080445	ENSMUSG00000050796	B3galt6	BB129894|GalTII	UDP-Gal:betaGal beta 1,3-galactosyltransferase, polypeptide 6	protein-coding
chr10	96077540	96077794	Intergenic	Intergenic	137004	NM_001001932	216238	Mm.210035	NM_001001932	ENSMUSG00000036499	Eea1	A430109M19Rik|B230358H09Rik|ZFYVE2	early endosome antigen 1	protein-coding
chr3	53956550	53957406	Intergenic	ORR1E|LTR|ERVL-MaLR	-93171	NM_026435	67890	Mm.23067	NM_026435	ENSMUSG00000027746	Ufm1	1810045K17Rik|AI132708|AI463323|Gm10726	ubiquitin-fold modifier 1	protein-coding
chr2	170820468	170820918	intron (NM_029761, intron 2 of 7)	intron (NM_029761, intron 2 of 7)	88886	NM_029761	76829	Mm.41633	NM_029761	ENSMUSG00000027560	Dok5	2700055C10Rik	docking protein 5	protein-coding
chr7	132430856	132431875	Intergenic	Intergenic	-114137	NM_029935	77590	Mm.213582	NM_029935	ENSMUSG00000030930	Chst15	4631426J05Rik|BRAG|GalNAc4S-6ST|GalNAcS-6ST|MAd5|mKIAA0598	carbohydrate sulfotransferase 15	protein-coding
chr2	143999102	143999750	intron (NM_024281, intron 1 of 23)	B1F1|SINE|Alu	11837	NM_024281	81910	Mm.13705	NM_024281	ENSMUSG00000027422	Rrbp1	1700087N07Rik|5730465C04Rik|ES/130|mKIAA1398|mRRp0|mRRp1.8|mRRp10|mRRp15a|mRRp15b|mRRp16.8|mRRp2|mRRp41|mRRp47|mRRp5.4|p180	ribosome binding protein 1	protein-coding
chr13	24693223	24694023	intron (NM_178658, intron 9 of 13)	intron (NM_178658, intron 9 of 13)	-47598	NM_001370932	666145	Mm.390564	NM_001370932	ENSMUSG00000085861	Armh2	1700016G14Rik	armadillo-like helical domain containing 2	protein-coding
chr13	60334900	60335604	Intergenic	Intergenic	129781	NR_036449	100503759	Mm.38101	NM_177810	ENSMUSG00000050765	Gm5084	A030007L22|EG328264	predicted gene 5084	ncRNA
chr9	82975382	82976067	promoter-TSS (NM_001081216)	promoter-TSS (NM_001081216)	-235	NM_001081216	83946	Mm.221688	NM_031879	ENSMUSG00000032253	Phip	2810004D21Rik|4632404O06Rik|Ndrp|Wdr11	pleckstrin homology domain interacting protein	protein-coding
chr12	111366985	111367685	intron (NM_183016, intron 1 of 36)	intron (NM_183016, intron 1 of 36)	10383	NM_183016	217866	Mm.27397	NM_183016	ENSMUSG00000021279	Cdc42bpb	MRCKb	CDC42 binding protein kinase beta	protein-coding
chr8	17436653	17437383	intron (NM_053171, intron 1 of 69)	L1MC4a|LINE|L1	98367	NM_053171	94109	Mm.436988	NM_053171	ENSMUSG00000060924	Csmd1	B930082H09|mKIAA1890	CUB and Sushi multiple domains 1	protein-coding
chr18	75971049	75971804	intron (NM_145356, intron 2 of 4)	intron (NM_145356, intron 2 of 4)	-87900	NM_001357506	207259	Mm.159332	NM_145356	ENSMUSG00000044646	Zbtb7c	B230208J24Rik|Kr-pok|Zbtb36	zinc finger and BTB domain containing 7C	protein-coding
chr11	70549279	70549752	intron (NM_001302475, intron 10 of 24)	PB1D7|SINE|Alu	9243	NM_001302476	18806	Mm.260177	NM_008876	ENSMUSG00000020828	Pld2	PLD1C	phospholipase D2	protein-coding
chr19	29066994	29067636	promoter-TSS (NR_045687)	promoter-TSS (NR_045687)	14	NR_045687	100503337	Mm.103412	NR_045687	ENSMUSG00000118038	Gm9895	-	predicted gene 9895	ncRNA
chr18	24950265	24950844	intron (NM_175276, intron 5 of 26)	intron (NM_175276, intron 5 of 26)	215411	NM_001142697	66648	Mm.263189	NM_001004361	ENSMUSG00000024269	Tpgs2	5730437P09Rik|5730494M16Rik|AI666318|Pgs2	tubulin polyglutamylase complex subunit 2	protein-coding
chr4	143023490	143023981	Intergenic	Intergenic	112427	NR_105988	102465618		NR_105988	ENSMUSG00000106597	Mir7021	mmu-mir-7021	microRNA 7021	ncRNA
chr13	53123162	53123700	intron (NM_013846, intron 4 of 8)	intron (NM_013846, intron 4 of 8)	-142392	NM_017373	18030	Mm.136604	NM_017373	ENSMUSG00000056749	Nfil3	AV225605|E4BP4	nuclear factor, interleukin 3, regulated	protein-coding
chr14	121283394	121284167	TTS (NM_134082)	TTS (NM_134082)	35074	NR_155502	320268	Mm.435974	NR_155502		B930095G15Rik	-	RIKEN cDNA B930095G15 gene	ncRNA
chr17	24342814	24343056	intron (NM_001031621, intron 3 of 30)	Lx7|LINE|L1	8124	NM_001031621	381072	Mm.328842	NM_001031621	ENSMUSG00000035435	Abca17	-	ATP-binding cassette, sub-family A (ABC1), member 17	protein-coding
chr16	84647504	84648455	Intergenic	Intergenic	-31810	NR_040537	78023	Mm.243853	NR_040537		4930529L06Rik	-	RIKEN cDNA 4930529L06 gene	ncRNA
chr8	46747644	46748378	intron (NM_008391, intron 1 of 8)	intron (NM_008391, intron 1 of 8)	8266	NM_008391	16363	Mm.1149	NM_008391	ENSMUSG00000031627	Irf2	9830146E22Rik|AI646973|Irf-2	interferon regulatory factor 2	protein-coding
chr18	77353820	77354429	intron (NM_172834, intron 12 of 38)	RMER1B|Other|Other	72466	NM_172834	240411	Mm.380247	NM_172834	ENSMUSG00000032818	Loxhd1	1700096C21Rik|4932417K07|sba	lipoxygenase homology domains 1	protein-coding
chr5	133085883	133086442	Intergenic	MTEa|LTR|ERVL-MaLR	-542942	NM_001363480	319974	Mm.409595	NM_177047	ENSMUSG00000029673	Auts2	2700063G02Rik|A730011F23Rik|D830032G16Rik	autism susceptibility candidate 2	protein-coding
chr5	111644072	111644621	Intergenic	(GGCTG)n|Simple_repeat|Simple_repeat	62785	NR_015546	330164	Mm.193276	NM_177875	ENSMUSG00000052848	C130026L21Rik	-	RIKEN cDNA C130026L21 gene	ncRNA
chr16	90125478	90126225	Intergenic	Intergenic	-16386	NR_033476	100038709	Mm.484070	NR_033476		Gm10789	-	predicted gene 10789	ncRNA
chr5	131275604	131276229	intron (NM_145218, intron 1 of 10)	MTEa|LTR|ERVL-MaLR	31606	NM_145218	212996	Mm.299204	NM_145218	ENSMUSG00000034040	Galnt17	AA388321|E330012B09Rik|Galnt19|Gcap8|Wbscr17	polypeptide N-acetylgalactosaminyltransferase 17	protein-coding
chr9	46693492	46693958	Intergenic	L1MA5|LINE|L1	-219878	NR_015605	73040	Mm.265384	NR_015605	ENSMUSG00000099696	2900052N01Rik	AU067665	RIKEN cDNA 2900052N01 gene	ncRNA
chr1	152918343	152919030	Intergenic	RMER4B|LTR|ERVK	-16040	NM_001160256	226517	Mm.270775	NM_001005507	ENSMUSG00000042772	Smg7	9430023P16Rik|mKIAA0250	Smg-7 homolog, nonsense mediated mRNA decay factor (C. elegans)	protein-coding
chr13	99864619	99865238	Intergenic	Intergenic	35755	NM_001081493	27220	Mm.75498	NM_013732	ENSMUSG00000021647	Cartpt	Cart	CART prepropeptide	protein-coding
chr8	117353760	117354374	intron (NM_028941, intron 1 of 20)	intron (NM_028941, intron 1 of 20)	4897	NM_028941	74440	Mm.233181	NM_028941	ENSMUSG00000034390	Cmip	4933407C03Rik|5830471E12Rik|AI314065|AI464126	c-Maf inducing protein	protein-coding
chr8	9517599	9518380	intron (NM_173446, intron 1 of 2)	RLTR42-int|LTR|ERVK	253034	NM_173446	270028	Mm.268163	NM_173446	ENSMUSG00000079157	Fam155a	6430500D16|AW121567|Tmem28	family with sequence similarity 155, member A	protein-coding
chr9	117454998	117455673	intron (NM_001172121, intron 1 of 14)	intron (NM_001172121, intron 1 of 14)	174578	NM_001172121	207181	Mm.326411	NM_178660	ENSMUSG00000039607	Rbms3	6720477E09Rik|8430436O14Rik	RNA binding motif, single stranded interacting protein	protein-coding
chr11	52514053	52514788	Intergenic	Intergenic	117992	NM_153117	213673	Mm.291979	NM_153117	ENSMUSG00000036275	9530068E07Rik	C85061|Kct2	RIKEN cDNA 9530068E07 gene	protein-coding
chr15	90566004	90566741	intron (NM_001357979, intron 9 of 18)	intron (NM_001357979, intron 9 of 18)	113016	NM_001357979	66871	Mm.290991	NM_025815	ENSMUSG00000052560	Cpne8	1200003E11Rik|1500031E20Rik	copine VIII	protein-coding
chr2	28374899	28375520	Intergenic	Intergenic	-71637	NM_001005420	241289	Mm.330095	NM_001005420	ENSMUSG00000035829	Ppp1r26	Gm347|Kiaa0649|mKIAA0649	protein phosphatase 1, regulatory subunit 26	protein-coding
chr8	30327708	30328392	Intergenic	Intergenic	-240345	NR_045856	71314	Mm.158666	NR_045856	ENSMUSG00000097044	4933433F19Rik	-	RIKEN cDNA 4933433F19 gene	ncRNA
chr8	114588190	114589406	intron (NM_019573, intron 5 of 8)	intron (NM_019573, intron 5 of 8)	149146	NM_019573	80707	Mm.440420	NM_019573	ENSMUSG00000004637	Wwox	5330426P09Rik|9030416C10Rik|WOX1	WW domain-containing oxidoreductase	protein-coding
chr8	25461497	25462299	Intergenic	Intergenic	-56861	NM_001079908	14182	Mm.265716	NM_010206	ENSMUSG00000031565	Fgfr1	AW208770|Eask|FGFR-I|FLG|Fgfr-1|Flt-2|Fr1|Hspy|MFR|bFGF-R-1|c-fgr	fibroblast growth factor receptor 1	protein-coding
chr6	47341443	47342005	Intergenic	MER57C2|LTR|ERV1	97328	NM_025771	66797	Mm.440084	NM_025771	ENSMUSG00000039419	Cntnap2	5430425M22Rik|Caspr2|mKIAA0868	contactin associated protein-like 2	protein-coding
chr13	69611109	69611988	promoter-TSS (NM_145354)	promoter-TSS (NM_145354)	-85	NM_175283	78925	Mm.451912	NM_175283	ENSMUSG00000021594	Srd5a1	0610031P22Rik|4930435F02Rik|S5AR 1|Srd5a-1	steroid 5 alpha-reductase 1	protein-coding
chr11	82297635	82298258	Intergenic	MTEb|LTR|ERVL-MaLR	-90954	NM_001304439	270893	Mm.341593	NM_023438	ENSMUSG00000020701	Tmem132e	Gm644	transmembrane protein 132E	protein-coding
chr11	15429536	15429856	Intergenic	RLTR17B_Mm|LTR|ERVK	-828046	NM_145967	211739	Mm.284015	NM_145967	ENSMUSG00000048834	Vstm2a	Vstm2	V-set and transmembrane domain containing 2A	protein-coding
chr8	120709547	120710255	Intergenic	Intergenic	-26457	NM_008320	15900	Mm.334861	NM_008320	ENSMUSG00000041515	Irf8	AI893568|ICSBP|IRF-8|Icsbp1|Myls	interferon regulatory factor 8	protein-coding
chr13	47043119	47043569	promoter-TSS (NM_016785)	promoter-TSS (NM_016785)	-127	NM_016785	22017	Mm.10169	NM_016785	ENSMUSG00000021376	Tpmt	AW106912	thiopurine methyltransferase	protein-coding
chr5	67558719	67559371	Intergenic	Intergenic	-48838	NM_001033415	330096	Mm.442747	NM_001033415	ENSMUSG00000050010	Shisa3	D830007B15Rik	shisa family member 3	protein-coding
chr19	23811934	23812894	intron (NM_177034, intron 1 of 12)	Tigger7|DNA|TcMar-Tigger	53538	NM_177034	319924	Mm.22879	NM_177034	ENSMUSG00000024897	Apba1	6430513E09Rik|Lin-10|Mint|Mint1|Urop11|X11|X11alpha	amyloid beta (A4) precursor protein binding, family A, member 1	protein-coding
chr5	34187595	34188217	promoter-TSS (NM_010753)	promoter-TSS (NM_010753)	-196	NM_010753	17122	Mm.259260	NM_010753	ENSMUSG00000037235	Mxd4	2810410A03Rik|Mad4|bHLHc12	Max dimerization protein 4	protein-coding
chr11	70193141	70193938	Intergenic	Intergenic	-20371	NM_153081	216867	Mm.289238	NM_153081	ENSMUSG00000040938	Slc16a11	AB041591|MCT 11|MNCb-2717	solute carrier family 16 (monocarboxylic acid transporters), member 11	protein-coding
chr18	78016287	78017634	intron (NM_001195633, intron 33 of 43)	intron (NM_001195633, intron 33 of 43)	40481	NM_001101038	620235	Mm.35607	NM_001101038	ENSMUSG00000091055	Siglec15	Cd33l3|EG620235|SIGLEC-I	sialic acid binding Ig-like lectin 15	protein-coding
chr18	76451177	76451751	Intergenic	Tigger7|DNA|TcMar-Tigger	189019	NM_001311070	17126	Mm.152699	NM_010754	ENSMUSG00000024563	Smad2	7120426M23Rik|Madh2|Madr2|Smad-2|mMad2	SMAD family member 2	protein-coding
chr3	113764039	113764337	Intergenic	(GAGAA)n|Simple_repeat|Simple_repeat	-134039	NM_001038696	67225	Mm.316928	NM_026043	ENSMUSG00000027981	Rnpc3	2810441O16Rik|AI447568|C030014B17Rik	RNA-binding region (RNP1, RRM) containing 3	protein-coding
chr5	116254743	116255672	intron (NM_177759, intron 1 of 13)	intron (NM_177759, intron 1 of 13)	33778	NM_001360005	269693	Mm.10946	NM_177759	ENSMUSG00000043913	Ccdc60	AU018954|C130098D09	coiled-coil domain containing 60	protein-coding
chr17	13703709	13704033	Intergenic	L1M5|LINE|L1	-56670	NR_151731	17356	Mm.59167	NM_010806	ENSMUSG00000068036	Afdn	5033403D15Rik|AF6|Af-6|Afadin|Gm314|I-afadin|Mllt4|S-afadin	afadin, adherens junction formation factor	protein-coding
chr17	75109627	75110402	intron (NM_019919, intron 3 of 33)	intron (NM_019919, intron 3 of 33)	-68767	NM_206958	268977	Mm.269747	NM_019919	ENSMUSG00000001870	Ltbp1	9430031G15Rik|9830146M04|Ltbp-1|Ltbp1L|TGF-beta1-BP-1|Tgfb|b2b1000Clo	latent transforming growth factor beta binding protein 1	protein-coding
chr8	13049285	13049995	intron (NM_001242368, intron 6 of 8)	intron (NM_001242368, intron 6 of 8)	-11268	NM_001357219	66901	Mm.441140	NM_025834	ENSMUSG00000031445	Proz	1300015B06Rik	protein Z, vitamin K-dependent plasma glycoprotein	protein-coding
chr2	10163531	10164159	intron (NM_172471, intron 1 of 13)	intron (NM_172471, intron 1 of 13)	10302	NM_172471	209378	Mm.313876	NM_172471	ENSMUSG00000025780	Itih5	4631408O11Rik|5430408M01Rik|E130106B02	inter-alpha (globulin) inhibitor H5	protein-coding
chr16	21531666	21532135	intron (NM_001081366, intron 31 of 46)	intron (NM_001081366, intron 31 of 46)	108782	NM_001081366	209018	Mm.235683	NM_145948	ENSMUSG00000033653	Vps8	AI315068|AU040738|mKIAA0804	VPS8 CORVET complex subunit	protein-coding
chr7	27561661	27562471	intron (NM_001122767, intron 1 of 8)	intron (NM_001122767, intron 1 of 8)	1590	NM_001122767	66367	Mm.29831	NM_175107	ENSMUSG00000049643	2310022A10Rik	-	RIKEN cDNA 2310022A10 gene	protein-coding
chr10	66649007	66649845	Intergenic	(CA)n|Simple_repeat|Simple_repeat	270958	NR_138560	68488	Mm.338835	NR_138560		1110002J07Rik	-	RIKEN cDNA 1110002J07 gene	ncRNA
chr18	44816599	44816893	Intergenic	RLTR17B_Mm|LTR|ERVK	-4564	NM_001085373	328949	Mm.312511	NM_001033406	ENSMUSG00000071856	Mcc	D18Ertd451e|E330037C19	mutated in colorectal cancers	protein-coding
chr6	71242787	71243486	intron (NM_001160127, intron 1 of 9)	RMER1B|Other|Other	19145	NM_009762	12180	Mm.234274	NM_009762	ENSMUSG00000055027	Smyd1	4632404M21Rik|Bop|C78565|Zmynd18	SET and MYND domain containing 1	protein-coding
chr2	178922430	178923355	Intergenic	ORR1C1-int|LTR|ERVL-MaLR	-492044	NM_026596	68175	Mm.158187	NM_026596		4930591A17Rik	-	RIKEN cDNA 4930591A17 gene	protein-coding
chr2	71866708	71867211	intron (NR_039557, intron 3 of 3)	B1_Mur2|SINE|Alu	-6265	NM_172665	228026	Mm.34411	NM_172665	ENSMUSG00000006494	Pdk1	B830012B01|D530020C15Rik	pyruvate dehydrogenase kinase, isoenzyme 1	protein-coding
chr2	29551793	29552266	Intergenic	Intergenic	-67691	NM_001039086	107746	Mm.298274	NM_054050	ENSMUSG00000039844	Rapgef1	4932418O06Rik|C3G|Grf2	Rap guanine nucleotide exchange factor (GEF) 1	protein-coding
chr13	46468988	46469782	Intergenic	Intergenic	-32518	NM_026056	67252	Mm.44529	NM_026056	ENSMUSG00000021373	Cap2	2810452G09Rik|AV045235	CAP, adenylate cyclase-associated protein, 2 (yeast)	protein-coding
chr5	122671898	122672844	intron (NM_001038839, intron 9 of 12)	MLT1K|LTR|ERVL-MaLR	-10226	NR_106195	102465902		NR_106195	ENSMUSG00000099324	Mir8115	Gm28012|mmu-mir-8115	microRNA 8115	ncRNA
chr2	156719834	156720908	promoter-TSS (NM_001042488)	promoter-TSS (NM_001042488)	538	NR_040505	74846	Mm.443946	NR_040505	ENSMUSG00000086638	4930405A21Rik	-	RIKEN cDNA 4930405A21 gene	ncRNA
chr8	9265824	9266722	intron (NM_173446, intron 1 of 2)	intron (NM_173446, intron 1 of 2)	121604	NR_073360	74688	Mm.159298	NR_073360	ENSMUSG00000109215	4930453L07Rik	-	RIKEN cDNA 4930453L07 gene	ncRNA
chr17	46555874	46556550	promoter-TSS (NM_020493)	promoter-TSS (NM_020493)	-50	NM_020493	20807	Mm.45044	NM_020493	ENSMUSG00000015605	Srf	AW049942|AW240594	serum response factor	protein-coding
chr18	59858405	59859198	Intergenic	Intergenic	279171	NR_105773	102465182		NR_105773	ENSMUSG00000098287	Mir6355	Gm27473|mmu-mir-6355	microRNA 6355	ncRNA
chr3	149314659	149315397	Intergenic	Intergenic	40291	NR_040591	381482	Mm.393866	NR_040591		Gm1653	-	predicted gene 1653	ncRNA
chr7	40121336	40122368	Intergenic	MTE2a|LTR|ERVL-MaLR	-552885	NR_045504	71029	Mm.399496	NR_045504	ENSMUSG00000102004	4933402C06Rik	-	RIKEN cDNA 4933402C06 gene	ncRNA
chr10	128010826	128011450	Intergenic	Intergenic	-3527	NM_001359377	27400	Mm.26719	NM_013786	ENSMUSG00000025396	Hsd17b6	17betaHSD9|Hsd17b9|Rdh8	hydroxysteroid (17-beta) dehydrogenase 6	protein-coding
chr10	50989255	50989644	TTS (NM_011376)	TTS (NM_011376)	93798	NM_011376	20464	Mm.4774	NM_011376	ENSMUSG00000019913	Sim1	bHLHe14|mSIM1	single-minded family bHLH transcription factor 1	protein-coding
chr19	5753873	5754567	intron (NM_008520, intron 19 of 27)	intron (NM_008520, intron 19 of 27)	13320	NM_008520	16998	Mm.182396	NM_008520	ENSMUSG00000024940	Ltbp3	Ltbp2|mFLJ00070	latent transforming growth factor beta binding protein 3	protein-coding
chr8	77835315	77836250	Intergenic	Intergenic	-111330	NM_010332	13617	Mm.283168	NM_010332	ENSMUSG00000031616	Ednra	AEA001|ET-AR|ETa|Gpcr10|Mhdaaea1	endothelin receptor type A	protein-coding
chr9	70913771	70914636	intron (NM_001324473, intron 1 of 8)	B1_Mus2|SINE|Alu	20605	NM_008280	15450	Mm.390187	NM_008280	ENSMUSG00000032207	Lipc	AI256194|HL|Hpl	lipase, hepatic	protein-coding
chr8	64454648	64455319	Intergenic	Intergenic	59458	NR_030491	735270		NR_030491	ENSMUSG00000076042	Mir710	Mirn710|mmu-mir-710	microRNA 710	ncRNA
chr9	96136856	96137710	intron (NM_001368879, intron 3 of 15)	intron (NM_001368879, intron 3 of 15)	17854	NM_177352	235533	Mm.213651	NM_177352	ENSMUSG00000041440	Gk5	AV095337|C330018K18Rik|G630067D24Rik	glycerol kinase 5 (putative)	protein-coding
chr4	155669011	155670167	promoter-TSS (NM_001256108)	promoter-TSS (NM_001256108)	-335	NM_001256108	76580	Mm.235738	NM_145124	ENSMUSG00000029060	Mib2	2210008I11Rik|Zzank1|skd	mindbomb E3 ubiquitin protein ligase 2	protein-coding
chr13	23544120	23544896	exon (NM_013548, exon 1 of 1)	exon (NM_013548, exon 1 of 1)	456	NM_013548	260423	Mm.221389	NM_013548	ENSMUSG00000100210	Hist1h3f	H3.2-221|Hist1	histone cluster 1, H3f	protein-coding
chr5	97016790	97017487	intron (NM_080708, intron 1 of 15)	intron (NM_080708, intron 1 of 15)	19449	NM_080708	140780	Mm.281490	NM_080708	ENSMUSG00000034663	Bmp2k	4933417M22Rik|AA673486|AV128808|BIKE	BMP2 inducible kinase	protein-coding
chr4	100813603	100814272	intron (NM_198037, intron 1 of 26)	intron (NM_198037, intron 1 of 26)	37258	NM_198037	320508	Mm.151962	NM_198037	ENSMUSG00000028532	Cachd1	1190007F10Rik|AI852726|B430218L07Rik|Vwcd1|mKIAA1573	cache domain containing 1	protein-coding
chr8	12128506	12129207	Intergenic	Intergenic	-256915	NR_027975	434280	Mm.447484	NM_001013812	ENSMUSG00000047935	Sox1ot	EG434280|Gm5607	Sox1 overlapping transcript	ncRNA
chr6	38885945	38886504	Intergenic	ID_B1|SINE|B4	-10034	NM_001294143	15258	Mm.23790	NM_010433	ENSMUSG00000061436	Hipk2	1110014O20Rik|B230339E18Rik|Stank	homeodomain interacting protein kinase 2	protein-coding
chr9	105562584	105563406	Intergenic	Intergenic	-41738	NM_001253831	235574	Mm.326247	NM_175025	ENSMUSG00000032570	Atp2c1	1700121J11Rik|ATP2C1A|AW061228|BCPM|D930003G21Rik|HHD|SPCA|pmr1	ATPase, Ca++-sequestering	protein-coding
chr16	35205036	35206027	intron (NM_001012765, intron 1 of 20)	intron (NM_001012765, intron 1 of 20)	50667	NM_001012765	224129	Mm.41137	NM_001012765	ENSMUSG00000022840	Adcy5	AW121902|Ac5	adenylate cyclase 5	protein-coding
chr9	42686193	42686690	intron (NM_175481, intron 4 of 20)	intron (NM_175481, intron 4 of 20)	-214183	NM_173038	272589	Mm.34483	NM_173038	ENSMUSG00000037287	Tbcel	D330014K23|E130107N23Rik|Lrrc35	tubulin folding cofactor E-like	protein-coding
chr2	171393668	171395131	Intergenic	Intergenic	568400	NR_040509	75655	Mm.396203	NR_040509	ENSMUSG00000086823	1700028P15Rik	-	RIKEN cDNA 1700028P15 gene	ncRNA
chr13	97224342	97225178	Intergenic	ID_B1|SINE|B4	-16345	NM_007930	13803	Mm.241073	NM_007930	ENSMUSG00000041773	Enc1	Nrpb|PIG10	ectodermal-neural cortex 1	protein-coding
chr2	166221828	166222827	Intergenic	RSINE1|SINE|B4	-51581	NR_033467	670775	Mm.384326	NR_033467	ENSMUSG00000084840	Gm11468	-	predicted gene 11468	ncRNA
chr10	99262852	99263551	promoter-TSS (NM_026268)	promoter-TSS (NM_026268)	-30	NM_026268	67603	Mm.1791	NM_026268	ENSMUSG00000019960	Dusp6	1300019I03Rik|MKP-3|MKP3|PYST1	dual specificity phosphatase 6	protein-coding
chr16	94909258	94909726	intron (NM_001025585, intron 2 of 2)	intron (NM_001025585, intron 2 of 2)	-52802	NM_001025590	16522	Mm.328720	NM_010606	ENSMUSG00000043301	Kcnj6	BIR1|GIRK2|KATP2|KCNJ7|Kir3.2|weaver|wv	potassium inwardly-rectifying channel, subfamily J, member 6	protein-coding
chr5	113636759	113637381	intron (NM_008153, intron 1 of 2)	intron (NM_008153, intron 1 of 2)	6533	NM_001359060	14747	Mm.5196	NM_008153	ENSMUSG00000042190	Cmklr1	ChemR23|DEZ|Gpcr27|mcmklr1	chemokine-like receptor 1	protein-coding
chr17	35584140	35584667	Intergenic	Intergenic	16918	NM_175148	69542	Mm.265291	NM_175148	ENSMUSG00000039269	2300002M23Rik	Stg|emprin	RIKEN cDNA 2300002M23 gene	protein-coding
chr17	30709187	30709563	intron (NM_013811, intron 29 of 92)	intron (NM_013811, intron 29 of 92)	82439	NM_013811	13417	Mm.426017	NM_013811	ENSMUSG00000033826	Dnah8	ATPase|Dnahc8|Hst6.7b|P1-Loop	dynein, axonemal, heavy chain 8	protein-coding
chr19	23858821	23859178	intron (NM_177034, intron 1 of 12)	intron (NM_177034, intron 1 of 12)	100123	NM_177034	319924	Mm.22879	NM_177034	ENSMUSG00000024897	Apba1	6430513E09Rik|Lin-10|Mint|Mint1|Urop11|X11|X11alpha	amyloid beta (A4) precursor protein binding, family A, member 1	protein-coding
chr3	53233357	53233911	intron (NM_175386, intron 3 of 3)	intron (NM_175386, intron 3 of 3)	192087	NM_175386	108927	Mm.118617	NM_175386	ENSMUSG00000048332	Lhfp	2810489O06Rik|AI194968|Lhfpl6	lipoma HMGIC fusion partner	protein-coding
chr12	93576991	93577214	Intergenic	(TTAGGG)n|Simple_repeat|Simple_repeat	-132279	NR_126436	75295	Mm.243878	NR_126436	ENSMUSG00000113164	4930559C10Rik	-	RIKEN cDNA 4930559C10 gene	ncRNA
chr11	59610527	59611179	Intergenic	Intergenic	-2113	NM_001011740	257886	Mm.457883	NM_001011740	ENSMUSG00000044061	Olfr225	MOR256-51	olfactory receptor 225	protein-coding
chr11	121982342	121982542	Intergenic	(TTAGGG)n|Simple_repeat|Simple_repeat	152224	NM_029049	74675	Mm.61213	NM_029049	ENSMUSG00000039198	Ptchd3	4930451E13Rik|4933440L20Rik|RNDEu-3	patched domain containing 3	protein-coding
chr6	146673410	146674946	Intergenic	B1_Mus2|SINE|Alu	16960	NR_046277	74925	Mm.386304	NR_046277	ENSMUSG00000085238	4930479D17Rik	-	RIKEN cDNA 4930479D17 gene	ncRNA
chr6	52465784	52466295	Intergenic	Intergenic	-26412	NR_046049	74304	Mm.490579	NR_046049	ENSMUSG00000107895	1700094M24Rik	-	RIKEN cDNA 1700094M24 gene	ncRNA
chr7	46035613	46036265	intron (NM_153057, intron 1 of 30)	intron (NM_153057, intron 1 of 30)	2243	NM_153057	211548	Mm.274811	NM_153057	ENSMUSG00000030835	Nomo1	D7Ertd156e|Nomo|pM5	nodal modulator 1	protein-coding
chr8	119384215	119385155	Intergenic	Intergenic	-10209	NM_019966	56690	Mm.423037	NM_019966	ENSMUSG00000074064	Mlycd	AI324784|Mcd	malonyl-CoA decarboxylase	protein-coding
chr8	60621245	60622231	Intergenic	RLTR26|LTR|ERVK	-11087	NM_001293769	71306	Mm.23242	NM_027756	ENSMUSG00000031647	Mfap3l	4933428A15Rik|5430405D20Rik|AI461995|AW125052|NYD-sp9|mKIAA0626	microfibrillar-associated protein 3-like	protein-coding
chr18	58171866	58172552	intron (NM_010181, intron 5 of 64)	intron (NM_010181, intron 5 of 64)	37717	NM_010181	14119	Mm.20271	NM_010181	ENSMUSG00000024598	Fbn2	BC063774|Fib-2|mKIAA4226|sne|sy	fibrillin 2	protein-coding
chr4	153153036	153153362	Intergenic	(TTAGGG)n|Simple_repeat|Simple_repeat	329631	NM_001099299	230959	Mm.318874	NM_001099299	ENSMUSG00000039546	Ajap1	Gm573	adherens junction associated protein 1	protein-coding
chr17	79949905	79950395	Intergenic	Intergenic	-54027	NM_001357753	56298	Mm.175403	NM_019717	ENSMUSG00000059811	Atl2	2010110I21Rik|AA407293|AV334690|Aip-2|Arl6ip2	atlastin GTPase 2	protein-coding
chr12	71053612	71054030	intron (NM_001081195, intron 11 of 23)	intron (NM_001081195, intron 11 of 23)	37854	NM_001081195	238247	Mm.241601	NM_001081195	ENSMUSG00000048118	Arid4a	A630009N03|A630067N03Rik|Rbbp1	AT rich interactive domain 4A (RBP1-like)	protein-coding
chr4	138399293	138400089	Intergenic	(CTTA)n|Simple_repeat|Simple_repeat	-3233	NM_001081672	625638	Mm.379091	NM_001081672	ENSMUSG00000078235	Fam43b	-	family with sequence similarity 43, member B	protein-coding
chr11	46706529	46707206	intron (NM_134249, intron 1 of 8)	RLTR14-int|LTR|ERV1	237	NM_134249	171284	Mm.234654	NM_134249	ENSMUSG00000040413	Timd2	AA816106|AU019358|AU019662|C78111|G9D3|TIM-2|Tim2	T cell immunoglobulin and mucin domain containing 2	protein-coding
chr5	144415208	144415860	Intergenic	ORR1E|LTR|ERVL-MaLR	57009	NR_102373	100579137		NR_102372	ENSMUSG00000104600	Dmrt1i	Dmr	Dmrt1 interacting ncRNA	ncRNA
chr3	142935929	142936372	Intergenic	MLT1O|LTR|ERVL-MaLR	53655	NR_152127	320229	Mm.187582	NR_152127		9530052C20Rik	-	RIKEN cDNA 9530052C20 gene	ncRNA
chr2	92830879	92831478	Intergenic	MTC|LTR|ERVL-MaLR	-83923	NM_030725	80976	Mm.33490	NM_030725	ENSMUSG00000027220	Syt13	5730409J20Rik|AI549909|mKIAA1427	synaptotagmin XIII	protein-coding
chr13	37710636	37711403	Intergenic	Intergenic	-115019	NM_026830	68750	Mm.491109	NM_026830	ENSMUSG00000039087	Rreb1	1110037N09Rik|AA414966|B930013M22Rik	ras responsive element binding protein 1	protein-coding
chr1	70205194	70205488	intron (NM_025728, intron 2 of 7)	(TA)n|Simple_repeat|Simple_repeat	253726	NM_025728	66722	Mm.440554	NM_025728	ENSMUSG00000053153	Spag16	4921511D23Rik|4930524F24Rik|4930585K05Rik|AV261009|Pf20|Wdr29	sperm associated antigen 16	protein-coding
chr14	33112531	33113087	intron (NM_001146022, intron 13 of 58)	intron (NM_001146022, intron 13 of 58)	72257	NM_001146022	545030	Mm.318345	NM_001146022	ENSMUSG00000051506	Wdfy4	Gm18810	WD repeat and FYVE domain containing 4	protein-coding
chr5	117750273	117750943	intron (NM_001312914, intron 16 of 19)	ORR1E|LTR|ERVL-MaLR	-116231	NM_008712	18125	Mm.44249	NM_008712	ENSMUSG00000029361	Nos1	2310005C01Rik|N-NOS|NC-NOS|NO|NOS|NOS-I|Nos-1|bNOS|nNOS	nitric oxide synthase 1, neuronal	protein-coding
chr9	45753875	45754796	TTS (NM_001081270)	TTS (NM_001081270)	74328	NM_001081373	214552	Mm.260103	NM_001081373	ENSMUSG00000043987	Cep164	AI450905|BC027092|D030051D21	centrosomal protein 164	protein-coding
chr12	106843163	106843898	Intergenic	Intergenic	-127206	NR_015512	71033	Mm.159404	NR_015512	ENSMUSG00000085820	4933406K04Rik	4930426M03Rik|4930485I22Rik|4933427G14Rik	RIKEN cDNA 4933406K04 gene	ncRNA
chr7	130850321	130851234	Intergenic	Intergenic	-14947	NM_001346515	101476	Mm.323554	NM_133942	ENSMUSG00000040268	Plekha1	AA960558|C920009D07Rik|TAPP1	pleckstrin homology domain containing, family A (phosphoinositide binding specific) member 1	protein-coding
chr14	106240395	106241060	Intergenic	Intergenic	134529	NR_073203	212085	Mm.78128	NM_198601	ENSMUSG00000022113	Trim52	4921513B05Rik	tripartite motif-containing 52	protein-coding
chr17	6194969	6195797	intron (NM_001103181, intron 3 of 13)	intron (NM_001103181, intron 3 of 13)	57235	NM_054040	68842	Mm.449307	NM_054040	ENSMUSG00000034377	Tulp4	1110057P05Rik|2210038L17Rik|Tusp	tubby like protein 4	protein-coding
chr9	42756892	42757441	intron (NM_175481, intron 3 of 20)	intron (NM_175481, intron 3 of 20)	187205	NM_175481	110637	Mm.370291	NM_175481	ENSMUSG00000032017	Grik4	6330551K01Rik|GluK4|GluRgamma1|KA-1|KA1	glutamate receptor, ionotropic, kainate 4	protein-coding
chr10	123199627	123199934	Intergenic	Intergenic	-2761	NM_001301628	14479	Mm.244209	NM_027604	ENSMUSG00000020124	Usp15	4921514G19Rik|AI327321|E430033I05Rik|Gcap18	ubiquitin specific peptidase 15	protein-coding
chr11	53891682	53892154	promoter-TSS (NM_011396)	promoter-TSS (NM_011396)	-215	NM_011396	20520	Mm.42253	NM_011396	ENSMUSG00000018900	Slc22a5	Lstpl|Octn2|jvs	solute carrier family 22 (organic cation transporter), member 5	protein-coding
chr14	46468195	46468960	Intergenic	Intergenic	-77908	NM_001316360	12159	Mm.6813	NM_007554	ENSMUSG00000021835	Bmp4	Bmp-4|Bmp2b|Bmp2b-1|Bmp2b1	bone morphogenetic protein 4	protein-coding
chr8	34228086	34228842	Intergenic	MTEa|LTR|ERVL-MaLR	-61752	NR_105820	102465211		NR_105820	ENSMUSG00000098785	Mir6395	Gm27561|mmu-mir-6395	microRNA 6395	ncRNA
chr15	52854056	52854460	Intergenic	Lx2B|LINE|L1	141813	NM_027212	69790	Mm.195562	NM_027212	ENSMUSG00000038622	Med30	1810038N03Rik|2510044J04Rik|TRAP25|Thrap6	mediator complex subunit 30	protein-coding
chr18	33870295	33870614	intron (NM_013512, intron 10 of 23)	(GAGAA)n|Simple_repeat|Simple_repeat	75562	NR_038152	69749	Mm.248787	NR_038151	ENSMUSG00000087590	Epb41l4aos	2410004N09Rik|Epb4.1l4aos	erythrocyte membrane protein band 4.1 like 4a, opposite strand	ncRNA
chr11	44579663	44580149	Intergenic	MTE2b|LTR|ERVL-MaLR	-6411	NR_126460	75389	Mm.261421	NR_126460	ENSMUSG00000086501	4930597A21Rik	-	RIKEN cDNA 4930597A21 gene	ncRNA
chr9	104266992	104267724	Intergenic	Intergenic	-4428	NM_001163026	235567	Mm.217256	NM_001163026	ENSMUSG00000032560	Dnajc13	D030002L11Rik|Gm1124|RME-8|Rme8|mKIAA0678	DnaJ heat shock protein family (Hsp40) member C13	protein-coding
chr10	108605493	108605953	intron (NM_001252342, intron 8 of 10)	intron (NM_001252342, intron 8 of 10)	94437	NM_203660	368203	Mm.452758	NM_203660	ENSMUSG00000112039	Gm5136	C6.1AL|EG368203	predicted gene 5136	protein-coding
chr13	95215717	95216251	intron (NM_001170669, intron 1 of 18)	intron (NM_001170669, intron 1 of 18)	7066	NM_001170669	218461	Mm.100167	NM_172263	ENSMUSG00000021684	Pde8b	B230331L10Rik|C030047E14Rik	phosphodiesterase 8B	protein-coding
chr3	55626102	55627152	3' UTR (NM_030595, exon 58 of 58)	3' UTR (NM_030595, exon 58 of 58)	-155883	NM_010750	17116	Mm.440209	NM_010750	ENSMUSG00000056947	Mab21l1	AW047968	mab-21-like 1	protein-coding
chr10	52759667	52760243	intron (NM_178675, intron 1 of 7)	intron (NM_178675, intron 1 of 7)	69454	NM_178675	215085	Mm.338690	NM_178675	ENSMUSG00000038602	Slc35f1	Duf6|E130016L02	solute carrier family 35, member F1	protein-coding
chr2	172536239	172536850	Intergenic	RMER19A|LTR|ERVK	-13049	NM_009335	21420	Mm.3629	NM_009335	ENSMUSG00000028640	Tfap2c	AA409384|AP2gamma|Ap-2.2|Stra2|Tcfap2c	transcription factor AP-2, gamma	protein-coding
chr10	120216811	120217329	intron (NM_026617, intron 2 of 6)	intron (NM_026617, intron 2 of 6)	8244	NM_026617	68212	Mm.157426	NM_026617	ENSMUSG00000020225	Tmbim4	0610007H07Rik|AU022431	transmembrane BAX inhibitor motif containing 4	protein-coding
chr12	71706503	71707153	Intergenic	L1MC|LINE|L1	-124240	NM_172464	208846	Mm.87417	NM_026102	ENSMUSG00000034574	Daam1	-	dishevelled associated activator of morphogenesis 1	protein-coding
chr5	113197007	113198253	Intergenic	Intergenic	-29279	NM_001033428	333048	Mm.332586	NM_001033428	ENSMUSG00000066964	Tmem211	Gm854	transmembrane protein 211	protein-coding
chr6	145111484	145112342	Intergenic	Intergenic	-3723	NM_001281980	16970	Mm.843	NM_008511	ENSMUSG00000030263	Lrmp	D6Int3|D6Int4|D6Int5|D6Int7|D6Int8|Jaw1	lymphoid-restricted membrane protein	protein-coding
chr14	76205090	76205851	Intergenic	MTE2a|LTR|ERVL-MaLR	-45992	NR_152108	72893	Mm.233565	NR_152108		2900040C04Rik	-	RIKEN cDNA 2900040C04 gene	ncRNA
chr8	46470679	46471163	promoter-TSS (NM_007981)	promoter-TSS (NM_007981)	-116	NM_007981	14081	Mm.210323	NM_007981	ENSMUSG00000018796	Acsl1	Acas|Acas1|Acs|FACS|Facl2|LACS 1|LACS1	acyl-CoA synthetase long-chain family member 1	protein-coding
chr3	20276730	20277120	Intergenic	LTR40a|LTR|ERVL	-1192	NM_029706	76703	Mm.34692	NM_029706	ENSMUSG00000011463	Cpb1	0910001A18Rik|1810063F02Rik|2210008M23Rik|AI504870	carboxypeptidase B1 (tissue)	protein-coding
chr10	112270503	112271286	promoter-TSS (NM_001359752)	promoter-TSS (NM_001359752)	-227	NM_001359752	268345	Mm.336242	NM_001025581	ENSMUSG00000035681	Kcnc2	AW047325|B230117I07|KShIIIA|Kv3.2	potassium voltage gated channel, Shaw-related subfamily, member 2	protein-coding
chr9	66900166	66900482	intron (NM_173413, intron 1 of 7)	L1MA8|LINE|L1	19381	NM_173413	235442	Mm.260376	NM_173413	ENSMUSG00000036943	Rab8b	5930437D16|D330025I23Rik	RAB8B, member RAS oncogene family	protein-coding
chr3	138915492	138916094	Intergenic	Intergenic	159408	NM_001356388	229877	Mm.28893	NM_145544	ENSMUSG00000028149	Rap1gds1	BC011279|GDS1	RAP1, GTP-GDP dissociation stimulator 1	protein-coding
chr8	9852287	9853164	Intergenic	RLTR1C|LTR|ERV1	-81568	NM_001347127	270028	Mm.268163	NM_173446	ENSMUSG00000079157	Fam155a	6430500D16|AW121567|Tmem28	family with sequence similarity 155, member A	protein-coding
chr16	97679956	97680559	Intergenic	ORR1E-int|LTR|ERVL-MaLR	-69062	NM_015775	50528	Mm.276145	NM_015775	ENSMUSG00000000385	Tmprss2	D16Ertd61e	transmembrane protease, serine 2	protein-coding
chr14	65089152	65090121	intron (NM_018788, intron 1 of 6)	PB1D10|SINE|Alu	8470	NM_018788	54616	Mm.103748	NM_018788	ENSMUSG00000021978	Extl3	2900009G18Rik|AU040105|Ext1l|mKIAA0519	exostoses (multiple)-like 3	protein-coding
chr10	116819018	116819631	intron (NM_001033333, intron 11 of 24)	intron (NM_001033333, intron 11 of 24)	77555	NM_001033333	237558	Mm.336386	NM_001033333	ENSMUSG00000034057	Myrfl	Gm239	myelin regulatory factor-like	protein-coding
chr16	22176160	22176536	Intergenic	Intergenic	-13049	NM_183029	319765	Mm.489442	NM_183029	ENSMUSG00000033581	Igf2bp2	C330012H03Rik|IMP-2|Imp2|Neilsen	insulin-like growth factor 2 mRNA binding protein 2	protein-coding
chr5	119245865	119246222	Intergenic	(TA)n|Simple_repeat|Simple_repeat	-46025	NR_046033	665194	Mm.491047	NR_046033	ENSMUSG00000107334	Gm7538	EG665194	predicted gene 7538	ncRNA
chr3	154455123	154455640	Intergenic	MTC|LTR|ERVL-MaLR	124560	NR_040387	99686	Mm.38082	NR_040387	ENSMUSG00000093738	AI606473	-	expressed sequence AI606473	ncRNA
chr6	91742146	91742696	intron (NM_009320, intron 9 of 14)	intron (NM_009320, intron 9 of 14)	58354	NM_009320	21366	Mm.395650	NM_009320	ENSMUSG00000030096	Slc6a6	AA589629|C80501|Taut	solute carrier family 6 (neurotransmitter transporter, taurine), member 6	protein-coding
chr10	59434574	59434977	intron (NM_010959, intron 4 of 8)	intron (NM_010959, intron 4 of 8)	7004	NM_010959	18302	Mm.123013	NM_010959	ENSMUSG00000009654	Oit3	EF-9|LZP	oncoprotein induced transcript 3	protein-coding
chr10	75235768	75236527	intron (NM_153406, intron 2 of 15)	Lx5b|LINE|L1	23757	NM_001145826	74392	Mm.27716	NM_153406	ENSMUSG00000033444	Specc1l	4930470P14Rik|4932439K10Rik|9530057A13Rik|AI317249|Cytsa|mKIAA0376	sperm antigen with calponin homology and coiled-coil domains 1-like	protein-coding
chr10	94458330	94458938	intron (NM_001359762, intron 2 of 4)	intron (NM_001359762, intron 2 of 4)	-56223	NM_172051	319880	Mm.23047	NM_172051	ENSMUSG00000020023	Tmcc3	A230066D03Rik|AW488095|C630016B22Rik|C88213|Gm1556|Tmcc1	transmembrane and coiled coil domains 3	protein-coding
chr6	8820377	8820728	Intergenic	Intergenic	-42068	NM_010492	15893	Mm.275683	NM_010492	ENSMUSG00000062995	Ica1	69kDa|ICA69	islet cell autoantigen 1	protein-coding
chr15	58386614	58387434	intron (NM_027211, intron 1 of 8)	intron (NM_027211, intron 1 of 8)	2250	NM_027211	69787	Mm.237985	NM_027211		Anxa13	1810034H17Rik|AV055219	annexin A13	protein-coding
chr5	113074065	113074874	Intergenic	Intergenic	-4352	NM_007773	12961	Mm.1215	NM_007773	ENSMUSG00000042240	Crybb2	Cryb-2	crystallin, beta B2	protein-coding
chr2	166361287	166361979	Intergenic	Tigger7|DNA|TcMar-Tigger	-85818	NR_015558	319684	Mm.399746	NR_015558		5031425F14Rik	-	RIKEN cDNA 5031425F14 gene	ncRNA
chr14	60623209	60623872	Intergenic	Intergenic	-11165	NM_001033272	219140	Mm.149776	NM_001033272	ENSMUSG00000021990	Spata13	C79050|ESTM11|X83327|mFLJ00298	spermatogenesis associated 13	protein-coding
chr11	109269633	109270205	intron (NM_011268, intron 7 of 18)	intron (NM_011268, intron 7 of 18)	28262	NM_001165934	19739	Mm.38548	NM_011268	ENSMUSG00000020599	Rgs9	RGS9-1|Rgs9-2	regulator of G-protein signaling 9	protein-coding
chr4	141586728	141587455	intron (NM_133754, intron 5 of 8)	RMER4B|LTR|ERVK	12833	NM_001163256	74202	Mm.490327	NM_133754	ENSMUSG00000006219	Fblim1	2410043F08Rik|Cal|Fblp1|Gt10|migfilin|migfilin(s)	filamin binding LIM protein 1	protein-coding
chr10	24609724	24610077	Intergenic	Intergenic	-14097	NR_163910
chr16	50930206	50931151	Intergenic	Lx4A|LINE|L1	147269	NR_131005	78639	Mm.160109	NR_131005	ENSMUSG00000092276	1700116B05Rik	-	RIKEN cDNA 1700116B05 gene	ncRNA
chr17	7414560	7415212	Intergenic	Intergenic	-29581	NM_001142539	667055	Mm.327371	NM_001142539	ENSMUSG00000056133	Unc93a2	Gm9992	unc-93 homolog A2	protein-coding
chr11	70501865	70502512	Intergenic	Intergenic	-3086	NM_029360	75604	Mm.24400	NM_029360	ENSMUSG00000018919	Tm4sf5	2010003F10Rik|AI323987	transmembrane 4 superfamily member 5	protein-coding
chr10	84043335	84044039	intron (NR_152790, intron 3 of 4)	intron (NR_152790, intron 3 of 4)	57010	NR_152790	102637349	Mm.402869	NR_152790	ENSMUSG00000111049	Gm34184	-	predicted gene, 34184	ncRNA
chr1	20743908	20744301	Intergenic	(CAGAG)n|Simple_repeat|Simple_repeat	13199	NM_010552	16171	Mm.5419	NM_010552	ENSMUSG00000025929	Il17a	Ctla-8|Ctla8|IL-17|IL-17A|Il17	interleukin 17A	protein-coding
chr9	60693279	60693841	Intergenic	Intergenic	-5426	NM_001146046	102747	Mm.269413	NM_145616	ENSMUSG00000047766	Lrrc49	AI430817|AW050057|D430025H09Rik|PGs4|p79	leucine rich repeat containing 49	protein-coding
chr8	95209282	95210104	Intergenic	Intergenic	-67153	NM_001145831	16582	Mm.378951	NM_010631	ENSMUSG00000031788	Kifc3	AI325457|BB123200	kinesin family member C3	protein-coding
chr7	40709202	40709732	Intergenic	Intergenic	34730	NR_045504	71029	Mm.399496	NR_045504	ENSMUSG00000102004	4933402C06Rik	-	RIKEN cDNA 4933402C06 gene	ncRNA
chr4	142150194	142150868	intron (NM_144531, intron 4 of 13)	MLT1K|LTR|ERVL-MaLR	59677	NM_144531	71529	Mm.255986	NM_144531	ENSMUSG00000040606	Kazn	2310007B04Rik|9030409G11Rik|AI256607|AI666764|AW061099|Kaz|Kazrin	kazrin, periplakin interacting protein	protein-coding
chr10	107772613	107773261	intron (NM_001370989, intron 51 of 57)	intron (NM_001370989, intron 51 of 57)	-52996	NM_001370987
chr6	144956170	144956856	Intergenic	Intergenic	92299	NM_001024468	12035	Mm.4606	NM_007532	ENSMUSG00000030268	Bcat1	BCATc|Eca39	branched chain aminotransferase 1, cytosolic	protein-coding
chr10	75409454	75410248	intron (NM_133995, intron 1 of 9)	intron (NM_133995, intron 1 of 9)	2940	NM_133995	103149	Mm.441195	NM_133995	ENSMUSG00000033427	Upb1	AI195023	ureidopropionase, beta	protein-coding
chr13	112424180	112425201	Intergenic	Intergenic	-39380	NM_010560	16195	Mm.4364	NM_010560	ENSMUSG00000021756	Il6st	5133400A03Rik|AA389424|BB405851|CD130|D13Ertd699e|gp130	interleukin 6 signal transducer	protein-coding
chr4	132289042	132289321	intron (NM_025579, intron 3 of 5)	intron (NM_025579, intron 3 of 5)	14175	NM_001081651	242681	Mm.331927	NM_001081651	ENSMUSG00000089687	Rab42	9530096D07Rik|Rab42-ps	RAB42, member RAS oncogene family	protein-coding
chr12	34643217	34643952	intron (NM_001271386, intron 3 of 27)	intron (NM_001271386, intron 3 of 27)	-114695	NM_024124	79221	Mm.310551	NM_024124	ENSMUSG00000004698	Hdac9	AV022454|D030072B18Rik|HD7B|HD9|HDRP|Hdac7b|Mitr|mKIAA0744	histone deacetylase 9	protein-coding
chr3	32580333	32581012	3' UTR (NM_001348062, exon 10 of 10)	3' UTR (NM_001348062, exon 10 of 10)	35495	NM_001348062	14696	Mm.139192	NM_013531	ENSMUSG00000027669	Gnb4	6720453A21Rik|G(beta)4	guanine nucleotide binding protein (G protein), beta 4	protein-coding
chrX	102502751	102503167	intron (NM_001313742, intron 2 of 7)	intron (NM_001313742, intron 2 of 7)	2199	NM_027382	70315	Mm.328128	NM_027382	ENSMUSG00000067567	Hdac8	2610007D20Rik	histone deacetylase 8	protein-coding
chr10	69739731	69740494	intron (NM_170730, intron 1 of 17)	intron (NM_170730, intron 1 of 17)	-185420	NM_170687	11735	Mm.235960	NM_009670	ENSMUSG00000069601	Ank3	2900054D09Rik|AI314020|Ank-3|AnkG|Ankyrin-3|Ankyrin-G	ankyrin 3, epithelial	protein-coding
chr15	80206151	80207117	intron (NM_010795, intron 1 of 1)	MIR|SINE|MIR	-27446	NM_178719	239555	Mm.307163	NM_178719	ENSMUSG00000022412	Mief1	A230016E22|AI452372|Smcr7l	mitochondrial elongation factor 1	protein-coding
chr5	113472335	113473102	Intergenic	Intergenic	-77702	NM_177292	320916	Mm.102783	NM_177292	ENSMUSG00000063430	Wscd2	4933413A10Rik|C530024P05Rik|Gm450	WSC domain containing 2	protein-coding
chr9	103642959	103643622	intron (NM_178638, intron 2 of 5)	intron (NM_178638, intron 2 of 5)	49517	NM_001359465	81907	Mm.384704	NM_178638	ENSMUSG00000042757	Tmem108	AI462967|B130017P16Rik|R74726	transmembrane protein 108	protein-coding
chr9	91981703	91982597	Intergenic	Intergenic	-210943	NM_001195693	100504689		NM_001195693	ENSMUSG00000095654	Plscr5	331000	phospholipid scramblase family, member 5	protein-coding
chr4	58994783	58995870	Intergenic	Intergenic	-7867	NM_001033165	72429	Mm.317801	NM_001033165	ENSMUSG00000070972	Dnajc25	2010109C08Rik|2010203O07Rik	DnaJ heat shock protein family (Hsp40) member C25	protein-coding
chr7	99520563	99521661	Intergenic	MLT1A1|LTR|ERVL-MaLR	-14374	NM_177231	109689	Mm.260193	NM_177231	ENSMUSG00000018909	Arrb1	1200006I17Rik|AW208571|G430100A01Rik	arrestin, beta 1	protein-coding
chr6	118093900	118094410	Intergenic	Lx9|LINE|L1	8963	NR_106011	102465632		NR_106011	ENSMUSG00000098583	Mir7044	Gm27354|mmu-mir-7044	microRNA 7044	ncRNA
chr18	76648760	76649270	Intergenic	Intergenic	-207390	NM_001109743	664805	Mm.329543	NM_001109743	ENSMUSG00000091519	Skor2	Corl2|EG664805|Fussel18|Gm7348	SKI family transcriptional corepressor 2	protein-coding
chr2	72449319	72449751	Intergenic	RLTR24|LTR|ERV1	-26684	NM_025866	66953	Mm.270676	NM_025866	ENSMUSG00000055612	Cdca7	2310021G01Rik|AU044109|JPO1	cell division cycle associated 7	protein-coding
chr5	123109983	123110762	intron (NM_001039723, intron 6 of 11)	intron (NM_001039723, intron 6 of 11)	22257	NM_175092	23912	Mm.253876	NM_175092	ENSMUSG00000029449	Rhof	AI845056|AV026554|Arhf|Ifld1|Rif	ras homolog family member F (in filopodia)	protein-coding
chr12	84605004	84605774	intron (NM_008992, intron 13 of 18)	intron (NM_008992, intron 13 of 18)	12077	NM_008992	19300	Mm.229109	NM_008992	ENSMUSG00000021240	Abcd4	P69r|P70R|Pxmp1l	ATP-binding cassette, sub-family D (ALD), member 4	protein-coding
chr1	182713279	182713886	Intergenic	ORR1E|LTR|ERVL-MaLR	35598	NM_001033547	433386	Mm.338103	NM_001033547	ENSMUSG00000043429	Ccdc185	4922505E12Rik	coiled-coil domain containing 185	protein-coding
chr5	114006212	114007022	intron (NM_001286396, intron 1 of 10)	PB1D10|SINE|Alu	1809	NM_001286396	13142	Mm.20115	NM_010018	ENSMUSG00000042096	Dao	AI987963|DAAO|DAMOX|Dao-1|Dao1	D-amino acid oxidase	protein-coding
chr18	61558394	61558812	intron (NM_001357499, intron 2 of 10)	intron (NM_001357499, intron 2 of 10)	3330	NM_001357499	93687	Mm.26908	NM_146087	ENSMUSG00000024576	Csnk1a1	2610208K14Rik|4632404G05Rik|5430427P18Rik|CK1a|Csnk1a	casein kinase 1, alpha 1	protein-coding
chr17	12807732	12808711	intron (NR_027784, intron 2 of 2)	B1F|SINE|Alu	-38515	NM_010515	16004	Mm.26553	NM_010515	ENSMUSG00000023830	Igf2r	AI661837|CD222|CI-MPR|M6P/IGF2R|Mpr300	insulin-like growth factor 2 receptor	protein-coding
chr8	83360310	83360909	intron (NM_026233, intron 5 of 10)	B4A|SINE|B4	12137	NM_026233	67555	Mm.84115	NM_026233	ENSMUSG00000035057	Mgat4d	4933434I20Rik|GnT1IP|GnT1IP-L	MGAT4 family, member C	protein-coding
chr6	140918488	140918688	Intergenic	(TTTTC)n|Simple_repeat|Simple_repeat	291703	NM_001309436	11569	Mm.86453	NM_009637	ENSMUSG00000030232	Aebp2	AU023766|B230313N05Rik	AE binding protein 2	protein-coding
chr9	49374731	49375534	intron (NM_010077, intron 1 of 7)	intron (NM_010077, intron 1 of 7)	34729	NM_010077	13489	Mm.41970	NM_010077	ENSMUSG00000032259	Drd2	D2R|Drd-2	dopamine receptor D2	protein-coding
chr11	70636916	70637615	Intergenic	Intergenic	-1857	NM_010326	14723	Mm.377085	NM_010326	ENSMUSG00000050675	Gp1ba	GP-Ib alpha|GPIba|GPIbalpha	glycoprotein 1b, alpha polypeptide	protein-coding
chr15	77299820	77300373	intron (NM_175387, intron 1 of 12)	intron (NM_175387, intron 1 of 12)	6957	NM_175387	93686	Mm.202774	NM_053104	ENSMUSG00000033565	Rbfox2	Fbm2|Fxh|Hrnbp2|Rbm9	RNA binding protein, fox-1 homolog (C. elegans) 2	protein-coding
chr19	50670879	50671531	intron (NM_001360457, intron 1 of 26)	intron (NM_001360457, intron 1 of 26)	7441	NM_001360457	58178	Mm.313672	NM_021377	ENSMUSG00000043531	Sorcs1	Sorcs|mSorCS	sortilin-related VPS10 domain containing receptor 1	protein-coding
chr19	42230219	42230905	Intergenic	Intergenic	-17016	NM_001141983	71146	Mm.329851	NM_027694	ENSMUSG00000042532	Golga7b	4933417O08Rik|AI839934	golgi autoantigen, golgin subfamily a, 7B	protein-coding
chr2	98664978	98665196	Intergenic	SYNREP_MM|Satellite|Satellite	1197430	NM_001363049	241568	Mm.241682	NM_178725	ENSMUSG00000050587	Lrrc4c	6430556C10Rik|NGL-1	leucine rich repeat containing 4C	protein-coding
chr6	142938959	142939577	intron (NM_011374, intron 1 of 4)	intron (NM_011374, intron 1 of 4)	25184	NM_011374	20449	Mm.260838	NM_011374	ENSMUSG00000030283	St8sia1	9330109E03Rik|GD3S|Sia-T|Siat8|Siat8a	ST8 alpha-N-acetyl-neuraminide alpha-2,8-sialyltransferase 1	protein-coding
chr1	97919432	97919830	intron (NM_001357127, intron 7 of 25)	intron (NM_001357127, intron 7 of 25)	128162	NR_037993	78603	Mm.442597	NR_037993	ENSMUSG00000089706	B230216N24Rik	-	RIKEN cDNA B230216N24 gene	ncRNA
chr11	74476069	74476973	intron (NM_001015046, intron 3 of 24)	intron (NM_001015046, intron 3 of 24)	46280	NM_001364131	380711	Mm.425690	NM_001015046	ENSMUSG00000038807	Rap1gap2	AU067654|Garnl4|Gm1561|mKIAA1039	RAP1 GTPase activating protein 2	protein-coding
chr10	95767535	95768367	Intergenic	Intergenic	-172712	NM_001001932	216238	Mm.210035	NM_001001932	ENSMUSG00000036499	Eea1	A430109M19Rik|B230358H09Rik|ZFYVE2	early endosome antigen 1	protein-coding
chr1	40914842	40915445	Intergenic	Intergenic	109542	NM_001081198	381339	Mm.334678	NM_001081198	ENSMUSG00000079588	Tmem182	2310079P10Rik|AI414494	transmembrane protein 182	protein-coding
chr15	57776337	57777255	intron (NM_199449, intron 2 of 3)	intron (NM_199449, intron 2 of 3)	82129	NM_199449	387609	Mm.36557	NM_199449	ENSMUSG00000071757	Zhx2	Afr-1|Afr1|Raf|mKIAA0854	zinc fingers and homeoboxes 2	protein-coding
chr2	157434030	157434829	intron (NM_001025395, intron 1 of 13)	RMER30|DNA|hAT-Charlie	10136	NM_001025395	20779	Mm.22845	NM_009271	ENSMUSG00000027646	Src	AW259666|pp60c-src	Rous sarcoma oncogene	protein-coding
chr12	80571907	80572381	intron (NM_001361700, intron 2 of 15)	intron (NM_001361700, intron 2 of 15)	53154	NM_001081421	108760	Mm.308296	NM_134045	ENSMUSG00000021130	Galnt16	5730405L21Rik|AI415388|Galntl1|galNAc-T16|mpp-GalNAc-T16	polypeptide N-acetylgalactosaminyltransferase 16	protein-coding
chr8	121161485	121161994	Intergenic	RLTR20A3_MM|LTR|ERVK	34054	NM_008024	14241	Mm.5111	NM_008024	ENSMUSG00000097084	Foxl1	FREAC7|Fkh6|fkh-6	forkhead box L1	protein-coding
chr5	111323089	111323583	Intergenic	Lx9|LINE|L1	-7361	NM_001301644	56305	Mm.200516	NM_019640	ENSMUSG00000050017	Pitpnb	PI-TP-beta	phosphatidylinositol transfer protein, beta	protein-coding
chr16	38043971	38044963	intron (NR_040565, intron 3 of 3)	intron (NR_040565, intron 3 of 3)	27144	NR_040565	75175	Mm.399335	NR_040565		4930542C21Rik	-	RIKEN cDNA 4930542C21 gene	ncRNA
chr5	124709807	124710622	intron (NM_011596, intron 9 of 19)	intron (NM_011596, intron 9 of 19)	-14871	NM_019536	56087	Mm.261014	NM_019536	ENSMUSG00000038011	Dnah10	Dnahc10	dynein, axonemal, heavy chain 10	protein-coding
chr1	14700836	14701071	Intergenic	(TTC)n|Simple_repeat|Simple_repeat	55013	NM_001360810	17681	Mm.5820	NM_010827	ENSMUSG00000025930	Msc	MyoR|bHLHa22	musculin	protein-coding
chr4	87356169	87356951	Intergenic	Intergenic	-126020	NM_172426	76376	Mm.490487	NM_172426	ENSMUSG00000037996	Slc24a2	2810021B17Rik|6330417K15Rik|AI847460|Nckx2	solute carrier family 24 (sodium/potassium/calcium exchanger), member 2	protein-coding
chr19	34167861	34168480	Intergenic	Intergenic	-2129	NM_024204	52024	Mm.183030	NM_024204	ENSMUSG00000024774	Ankrd22	5430429D21Rik|D19Ertd675e	ankyrin repeat domain 22	protein-coding
chr14	48774952	48775588	intron (NR_029384, intron 4 of 4)	L1M2|LINE|L1	-103603	NR_033783	66770	Mm.136954	NR_033783	ENSMUSG00000115008	4933429O19Rik	1700031B11Rik	RIKEN cDNA 4933429O19 gene	ncRNA
chr13	10483951	10484607	Intergenic	Intergenic	-123476	NM_033269	12671	Mm.342315	NM_033269	ENSMUSG00000046159	Chrm3	Chrm-3|M3|M3R	cholinergic receptor, muscarinic 3, cardiac	protein-coding
chr4	16871012	16871290	Intergenic	(CATA)n|Simple_repeat|Simple_repeat	707041	NR_045765	100415915	Mm.387180	NR_045765	ENSMUSG00000085112	A530072M11Rik	-	RIKEN cDNA gene A530072M11	ncRNA
chr14	116184393	116184618	intron (NM_175500, intron 7 of 7)	(TCTCC)n|Simple_repeat|Simple_repeat	-740792	NM_011821	23888	Mm.440025	NM_011821	ENSMUSG00000058571	Gpc6	-	glypican 6	protein-coding
chr15	55518965	55519561	intron (NM_001368422, intron 47 of 47)	intron (NM_001368422, intron 47 of 47)	38049	NM_026759	68537	Mm.236795	NM_026759	ENSMUSG00000022370	Mrpl13	1110002D09Rik	mitochondrial ribosomal protein L13	protein-coding
chr19	29452400	29453010	intron (NM_021396, intron 4 of 5)	intron (NM_021396, intron 4 of 5)	41786	NM_021396	58205	Mm.116737	NM_021396	ENSMUSG00000016498	Pdcd1lg2	B7-DC|Btdc|F730015O22Rik|PD-L2	programmed cell death 1 ligand 2	protein-coding
chr19	12080447	12080627	intron (NR_030566, intron 2 of 3)	(TTCTC)n|Simple_repeat|Simple_repeat	-5907	NM_001011853	258155	Mm.377363	NM_001011853	ENSMUSG00000067526	Olfr1425	MOR239-7	olfactory receptor 1425	protein-coding
chr9	62178357	62178688	Intergenic	Intergenic	-55913	NM_001368304	93683	Mm.24411	NM_033320	ENSMUSG00000032252	Glce	1110017N23Rik|AI747411|C130034A12Rik|Hsepi	glucuronyl C5-epimerase	protein-coding
chr17	13305955	13306246	Intergenic	(CTGTG)n|Simple_repeat|Simple_repeat	-48472	NM_001167578	100041352	Mm.432087	NM_001167578	ENSMUSG00000052469	Tcp10c	D17Leh66C|D17Leh66ca|Gm9880|T66C-a|Tcp-10c	t-complex protein 10c	protein-coding
chr15	101894094	101894614	Intergenic	Intergenic	-1434	NM_001033177	77055	Mm.195788	NM_001033177	ENSMUSG00000075402	Krt76	2310001L23Rik	keratin 76	protein-coding
chr17	65299207	65300152	intron (NM_001008973, intron 13 of 14)	intron (NM_001008973, intron 13 of 14)	210378	NM_001360185	381107	Mm.141275	NM_001008973	ENSMUSG00000045036	Tmem232	E130009J12Rik|Gm940|Tes13-L|Tes13-S	transmembrane protein 232	protein-coding
chr8	11825291	11826093	3' UTR (NM_001113517, exon 19 of 19)	3' UTR (NM_001113517, exon 19 of 19)	-14829	NM_029326	75528	Mm.440342	NM_029326	ENSMUSG00000031512	Tex29	1700018L24Rik	testis expressed 29	protein-coding
chr15	100885486	100885815	intron (NM_001077499, intron 1 of 26)	intron (NM_001077499, intron 1 of 26)	15005	NM_001077499	20273	Mm.385012	NM_011323	ENSMUSG00000023033	Scn8a	AI853486|C630029C19Rik|NaCh6|Nav1.6|dmu|med|mnd-2|mnd2|nmf2|nmf335|nmf58|nur14|seal	sodium channel, voltage-gated, type VIII, alpha	protein-coding
chr10	94921913	94922869	intron (NM_018797, intron 2 of 30)	intron (NM_018797, intron 2 of 30)	22454	NM_018797	54712	Mm.256712	NM_018797	ENSMUSG00000074785	Plxnc1	2510048K12Rik|AW742158|CD232|Vespr	plexin C1	protein-coding
chr1	192679142	192679931	intron (NM_144881, intron 8 of 11)	intron (NM_144881, intron 8 of 11)	91683	NM_144881	226861	Mm.145857	NM_144881	ENSMUSG00000037375	Hhat	2810432O22Rik|AI462858|AP-2CRE|Skn|Tg(TFAP2A-cre)1Will	hedgehog acyltransferase	protein-coding
chr11	107861968	107862557	Intergenic	Intergenic	49100	NM_080644	140723	Mm.87663	NM_080644	ENSMUSG00000040373	Cacng5	-	calcium channel, voltage-dependent, gamma subunit 5	protein-coding
chr3	98968716	98969173	Intergenic	LTR16D|LTR|ERVL	-75714	NM_019545	56185	Mm.281874	NM_019545	ENSMUSG00000027870	Hao2	AI325478|Hao-2|Hao3|Haox3	hydroxyacid oxidase 2	protein-coding
chr13	69772834	69773056	Intergenic	(TTCTC)n|Simple_repeat|Simple_repeat	-33048	NM_001145162	76980	Mm.23960	NM_001145162	ENSMUSG00000052981	Ube2ql1	3110006E14Rik	ubiquitin-conjugating enzyme E2Q family-like 1	protein-coding
chr18	83812744	83813720	Intergenic	Intergenic	273233	NM_001081300	110796	Mm.102136	NM_001081300	ENSMUSG00000046982	Tshz1	5730407I04Rik|D18Bwg1409e|Mtsh1|NY-CO-33|Sdccag33|Tsh1|teashirt1	teashirt zinc finger family member 1	protein-coding
chr19	28821152	28822240	Intergenic	MER113|DNA|hAT-Charlie	-13439	NM_009199	20510	Mm.246670	NM_009199	ENSMUSG00000024935	Slc1a1	D130048G10Rik|EAAC1|EAAC2|EAAT3|MEAAC1	solute carrier family 1 (neuronal/epithelial high affinity glutamate transporter, system Xag), member 1	protein-coding
chr5	15612137	15613014	Intergenic	Lx2A1|LINE|L1	-6524	NM_025759	360220	Mm.425235	NM_025759	ENSMUSG00000070933	Speer4d	4933431D05Rik|SPEER-4D	spermatogenesis associated glutamate (E)-rich protein 4D	protein-coding
chr4	153715592	153716575	Intergenic	Intergenic	-233253	NM_001099299	230959	Mm.318874	NM_001099299	ENSMUSG00000039546	Ajap1	Gm573	adherens junction associated protein 1	protein-coding
chr9	123209634	123210053	intron (NM_133974, intron 1 of 8)	intron (NM_133974, intron 1 of 8)	6195	NM_133974	109332	Mm.27519	NM_133974	ENSMUSG00000035498	Cdcp1	9030022E12Rik|AA409659|E030027H19Rik	CUB domain containing protein 1	protein-coding
chr5	104240210	104240976	Intergenic	Intergenic	37976	NM_016779	13406	Mm.199008	NM_016779	ENSMUSG00000029307	Dmp1	AG1|AV020965|DMP-1|Dmp|PP	dentin matrix protein 1	protein-coding
chr12	102204898	102205549	intron (NM_172152, intron 2 of 16)	L1MA4|LINE|L1	76496	NM_001362345	238384	Mm.312448	NM_172152	ENSMUSG00000041771	Slc24a4	A930002M03Rik|AW492432|NCKX4	solute carrier family 24 (sodium/potassium/calcium exchanger), member 4	protein-coding
chr16	27387819	27389307	promoter-TSS (NM_026202)	promoter-TSS (NM_026202)	-393	NM_001289436	67501	Mm.258985	NM_026202	ENSMUSG00000038127	Ccdc50	C3orf6	coiled-coil domain containing 50	protein-coding
chr2	57394544	57394936	Intergenic	Intergenic	156358	NM_010274	14571	Mm.3711	NM_010274	ENSMUSG00000026827	Gpd2	AA408484|AI448216|AU021455|AW494132|GPDH|Gdm1|Gpd-m|Gpdh-m|TISP38	glycerol phosphate dehydrogenase 2, mitochondrial	protein-coding
chr1	111490356	111491034	Intergenic	Lx9|LINE|L1	374223	NM_001081316	319901	Mm.103468	NM_001081316	ENSMUSG00000038702	Dsel	9330132E09Rik|DS-epi2	dermatan sulfate epimerase-like	protein-coding
chr19	28559115	28559822	intron (NM_175459, intron 2 of 10)	intron (NM_175459, intron 2 of 10)	-118756	NR_045330	320176	Mm.406716	NR_045330	ENSMUSG00000097735	D930032P07Rik	-	RIKEN cDNA D930032P07 gene	ncRNA
chr8	120331047	120331780	Intergenic	Intergenic	-103183	NR_110496	434353	Mm.411793	NR_110496	ENSMUSG00000097960	A330074K22Rik	-	RIKEN cDNA A330074K22 gene	ncRNA
chr5	144605094	144605975	Intergenic	Intergenic	59647	NM_016789	53324	Mm.10099	NM_016789	ENSMUSG00000059991	Nptx2	Narp|np2	neuronal pentraxin 2	protein-coding
chr2	170850114	170850822	intron (NM_001163686, intron 6 of 7)	intron (NM_001163686, intron 6 of 7)	118661	NM_029761	76829	Mm.41633	NM_029761	ENSMUSG00000027560	Dok5	2700055C10Rik	docking protein 5	protein-coding
chr17	35240786	35241651	promoter-TSS (NM_019693)	promoter-TSS (NM_019693)	-528	NM_019693	53817	Mm.439827	NM_019693	ENSMUSG00000019432	Ddx39b	0610030D10Rik|AI428441|Bat-1|Bat1|Bat1a|D17H6S81E|D17H6S81E-1|D6S81Eh	DEAD (Asp-Glu-Ala-Asp) box polypeptide 39B	protein-coding
chr19	57216967	57217562	intron (NM_001362445, intron 1 of 20)	intron (NM_001362445, intron 1 of 20)	-1232	NM_001290813	226251	Mm.217161	NM_178688	ENSMUSG00000025085	Ablim1	2210411C18Rik|2610209L21Rik|4833406P10Rik|9330196J19Rik|AV079770|AW060987|AW215784|Limab1|mKIAA0059	actin-binding LIM protein 1	protein-coding
chr3	35680470	35680968	Intergenic	(TG)n|Simple_repeat|Simple_repeat	-14556	NR_040748	625963	Mm.251506	NR_040748	ENSMUSG00000105662	Gm6639	-	predicted gene 6639	ncRNA
chr9	56397172	56397731	intron (NM_172924, intron 1 of 6)	MTEb|LTR|ERVL-MaLR	20599	NM_172924	244895	Mm.490331	NM_172924	ENSMUSG00000074305	Peak1	1110049L02Rik|9530046P14|AA690169|BE132841|C230081A13Rik|SGK269|mKIAA2002	pseudopodium-enriched atypical kinase 1	protein-coding
chr5	101835184	101835592	3' UTR (NM_172882, exon 67 of 67)	3' UTR (NM_172882, exon 67 of 67)	70258	NM_173370	74596	Mm.46764	NM_173370	ENSMUSG00000029330	Cds1	4833409J18Rik|AI314024|AW125888	CDP-diacylglycerol synthase 1	protein-coding
chr18	63549048	63549805	Intergenic	Intergenic	142933	NM_016792	53382	Mm.19169	NM_016792	ENSMUSG00000024583	Txnl1	32kDa|TRP32|Txnl	thioredoxin-like 1	protein-coding
chr2	131467655	131468138	Intergenic	L1_Mur3|LINE|L1	-23966	NM_001177835	228608	Mm.136586	NM_145533	ENSMUSG00000027333	Smox	B130066H01Rik|PAO|PAOh1|SMO	spermine oxidase	protein-coding
chr10	24926974	24927648	intron (NM_007482, intron 1 of 7)	intron (NM_007482, intron 1 of 7)	159	NM_007482	11846	Mm.154144	NM_007482	ENSMUSG00000019987	Arg1	AI|AI256583|Arg-1|PGIF	arginase, liver	protein-coding
chr4	34456698	34457344	Intergenic	Intergenic	-93594	NM_001007589	433693	Mm.389532	NM_026019	ENSMUSG00000028291	Akirin2	2700059D21Rik|AA114675|AA522011|AU019887|Akirin-2	akirin 2	protein-coding
chr4	132093061	132093715	Intergenic	Intergenic	-18075	NM_001128607	269587	Mm.30038	NM_183428	ENSMUSG00000028906	Epb41	4.1R|AI415518|D4Ertd442e|Elp-1|Elp1|Epb4.1|mKIAA4056	erythrocyte membrane protein band 4.1	protein-coding
chr16	91180306	91180934	Intergenic	RMER5|LTR|ERV1	-44930	NM_016967	50913	Mm.37289	NM_016967	ENSMUSG00000039830	Olig2	AI604895|Bhlhb1|Olg-2|Oligo2|RK17|bHLHe19	oligodendrocyte transcription factor 2	protein-coding
chr3	46451191	46451782	Intergenic	L1_Mur2|LINE|L1	-3545	NM_001101479	241989	Mm.119234	NM_001101479	ENSMUSG00000090919	Pabpc4l	C330050A14Rik|EG241989	poly(A) binding protein, cytoplasmic 4-like	protein-coding
chr14	100468924	100469098	Intergenic	(TTCTC)n|Simple_repeat|Simple_repeat	-319215	NM_010636	16597	Mm.396499	NM_010636	ENSMUSG00000072294	Klf12	2700063E05Rik|AI225908|AI315654|AP-2rep|B130052C06Rik|D530033K05Rik	Kruppel-like factor 12	protein-coding
chr10	85226754	85227493	Intergenic	Intergenic	-42069	NM_007771	12952	Mm.26237	NM_007771	ENSMUSG00000020038	Cry1	AU020726|AU021000|Phll1	cryptochrome 1 (photolyase-like)	protein-coding
chr6	140849272	140849457	Intergenic	(TTCTC)n|Simple_repeat|Simple_repeat	222479	NM_001309436	11569	Mm.86453	NM_009637	ENSMUSG00000030232	Aebp2	AU023766|B230313N05Rik	AE binding protein 2	protein-coding
chr6	29305671	29306049	Intergenic	Intergenic	-13280	NM_001289663	330277	Mm.87624	NM_207258	ENSMUSG00000039742	Fam71f1	GARI-L1|Gm764|NYD-SP18	family with sequence similarity 71, member F1	protein-coding
chr18	74720754	74721299	intron (NM_201600, intron 27 of 38)	MIR3|SINE|MIR	57429	NR_028560	100217466		NR_028560		Scarna17	MBII-119	small Cajal body-specific RNA 17	ncRNA
chr3	36752096	36752849	Intergenic	Intergenic	-62305	NM_019510	22065	Mm.74363	NM_019510	ENSMUSG00000027716	Trpc3	Mwk|Trcp3|Trp3|Trrp3	transient receptor potential cation channel, subfamily C, member 3	protein-coding
chr2	166127641	166128362	intron (NM_001355619, intron 3 of 21)	intron (NM_001355619, intron 3 of 21)	27284	NM_001252578	72043	Mm.1011	NM_028072	ENSMUSG00000006800	Sulf2	2010004N24Rik|AU020235|MSulf-2|mKIAA1247	sulfatase 2	protein-coding
chr3	34679027	34680165	Intergenic	Intergenic	29601	NM_011443	20674	Mm.65396	NM_011443	ENSMUSG00000074637	Sox2	Sox-2|lcc|ysb	SRY (sex determining region Y)-box 2	protein-coding
chr9	120810217	120810894	Intergenic	MTC|LTR|ERVL-MaLR	104695	NR_040742	76402	Mm.436588	NR_040742	ENSMUSG00000100146	1700020M21Rik	-	RIKEN cDNA 1700020M21 gene	ncRNA
chr4	138933900	138934948	Intergenic	Intergenic	-20477	NM_028453	73162	Mm.238081	NM_028453	ENSMUSG00000041161	Otud3	3110030K17Rik	OTU domain containing 3	protein-coding
chr7	28956535	28957507	intron (NM_001360550, intron 1 of 21)	intron (NM_001360550, intron 1 of 21)	5311	NM_001360550	60595	Mm.81144	NM_021895	ENSMUSG00000054808	Actn4	C77391	actinin alpha 4	protein-coding
chr7	65595003	65596429	intron (NR_131060, intron 1 of 7)	MLT1A|LTR|ERVL-MaLR	13685	NR_131060	407810	Mm.249337	NR_131060	ENSMUSG00000086662	BC046251	-	cDNA sequence BC046251	ncRNA
chr6	145516417	145517396	Intergenic	Intergenic	-81981	NM_028742	74071	Mm.441497	NM_028742	ENSMUSG00000054966	Lmntd1	4933403M22Rik|AI482300|Ifltd1|Lmna-rs1|Lmna1	lamin tail domain containing 1	protein-coding
chr10	118291227	118291990	intron (NM_054079, intron 4 of 4)	intron (NM_054079, intron 4 of 4)	3430	NM_054079	116849	Mm.213193	NM_054079	ENSMUSG00000090461	Iltifb	IL-22b|IL-TIFb|Il22b	interleukin 10-related T cell-derived inducible factor beta	protein-coding
chr13	48854080	48854899	intron (NM_011078, intron 1 of 21)	intron (NM_011078, intron 1 of 21)	16396	NM_011078	18676	Mm.486213	NM_011078	ENSMUSG00000038025	Phf2	GRC5	PHD finger protein 2	protein-coding
chr2	57072184	57072409	Intergenic	A-rich|Low_complexity|Low_complexity	42742	NM_013613	18227	Mm.3507	NM_013613	ENSMUSG00000026826	Nr4a2	HZF-3|NOT|Nurr1|RNR-1|TINOR|TINUR	nuclear receptor subfamily 4, group A, member 2	protein-coding
chr3	116740905	116741379	3' UTR (NM_001081326, exon 34 of 34)	3' UTR (NM_001081326, exon 34 of 34)	-28862	NM_144902	229782	Mm.190758	NM_144902	ENSMUSG00000027957	Slc35a3	2310050P13Rik	solute carrier family 35 (UDP-N-acetylglucosamine (UDP-GlcNAc) transporter), member 3	protein-coding
chr5	103026810	103027455	intron (NM_001310685, intron 2 of 11)	intron (NM_001310685, intron 2 of 11)	31260	NM_001310685	26414	Mm.39253	NM_009158	ENSMUSG00000046709	Mapk10	C230008H04Rik|JNK3|JNK3B1|JNK3B2|SAPK(beta)|Serk2|p493F12|p54bSAPK	mitogen-activated protein kinase 10	protein-coding
chr8	125891563	125892067	intron (NM_175561, intron 2 of 33)	intron (NM_175561, intron 2 of 33)	-6099	NR_155422	102632990	Mm.429446	NR_155422		A730098A19Rik	-	RIKEN cDNA A730098A19 gene	ncRNA
chr8	107831034	107831374	Intergenic	Intergenic	-242722	NM_010817	17463	Mm.18347	NM_010817	ENSMUSG00000039067	Psmd7	AW107203|Mov-34|Mov34	proteasome (prosome, macropain) 26S subunit, non-ATPase, 7	protein-coding
chrX	12716043	12716602	intron (NM_001048208, intron 14 of 30)	PB1D9|SINE|Alu	-42683	NM_175141	69155	Mm.15974	NM_175141	ENSMUSG00000044148	1810030O07Rik	-	RIKEN cDNA 1810030O07 gene	protein-coding
chr7	44304876	44305649	intron (NM_009131, intron 3 of 3)	intron (NM_009131, intron 3 of 3)	1697	NM_009131	20256	Mm.20428	NM_009131	ENSMUSG00000004473	Clec11a	AW457320|Clecsf3|Scgf	C-type lectin domain family 11, member a	protein-coding
chr1	46886220	46887368	intron (NM_001356417, intron 2 of 10)	intron (NM_001356417, intron 2 of 10)	-33176	NM_172653	227059	Mm.233889	NM_172653	ENSMUSG00000025986	Slc39a10	2900042E17Rik|5430433I10|Zip10|mKIAA1265	solute carrier family 39 (zinc transporter), member 10	protein-coding
chr5	150913030	150913528	Intergenic	B1_Mm|SINE|Alu	-39328	NM_013823	16591	Mm.6500	NM_013823	ENSMUSG00000058488	Kl	alpha-kl	klotho	protein-coding
chr3	46727316	46727532	Intergenic	(TTCTC)n|Simple_repeat|Simple_repeat	173358	NR_105800	102465199		NR_105800	ENSMUSG00000098417	Mir6379	Gm27730|mmu-mir-6379	microRNA 6379	ncRNA
chr2	157619228	157620080	Intergenic	Intergenic	-53293	NM_016916	53619	Mm.480461	NM_016916	ENSMUSG00000067787	Blcap	AI462828|Bc10	bladder cancer associated protein	protein-coding
chr9	121998102	121998656	Intergenic	MTEa|LTR|ERVL-MaLR	-2353	NM_001289559	215494	Mm.402151	NM_153540	ENSMUSG00000066235	Pomgnt2	Ago61|C85492|Gtdc2	protein O-linked mannose beta 1,4-N-acetylglucosaminyltransferase 2	protein-coding
chr18	78165201	78165929	intron (NM_207651, intron 12 of 21)	intron (NM_207651, intron 12 of 21)	13607	NM_001110273	27411	Mm.44158	NM_030683	ENSMUSG00000024552	Slc14a2	UT-A1|UT-A3	solute carrier family 14 (urea transporter), member 2	protein-coding
chr16	90483326	90484116	intron (NM_015755, intron 8 of 10)	intron (NM_015755, intron 8 of 10)	97324	NM_015755	26559	Mm.125874	NM_015755	ENSMUSG00000053414	Hunk	Bstk1|Mak-v	hormonally upregulated Neu-associated kinase	protein-coding
chr16	96479288	96479906	intron (NM_008791, intron 1 of 2)	RMER10A|LTR|ERVL	11991	NM_008791	18546	Mm.5023	NM_008791	ENSMUSG00000090223	Pcp4	P16Rimb19|Pcp-4|Pep19	Purkinje cell protein 4	protein-coding
chr13	46257338	46257986	Intergenic	Intergenic	-16059	NM_001005422	380842	Mm.188108	NM_001005422	ENSMUSG00000063529	Stmnd1	Gm1574	stathmin domain containing 1	protein-coding
chr6	119450405	119450972	intron (NM_009525, intron 1 of 4)	intron (NM_009525, intron 1 of 4)	-1302	NM_001271757	22419	Mm.321818	NM_009525	ENSMUSG00000030170	Wnt5b	AW545702|Wnt-5b	wingless-type MMTV integration site family, member 5B	protein-coding
chr19	57534241	57534817	Intergenic	Intergenic	25463	NR_040307	78073	Mm.12411	NR_040306	ENSMUSG00000117655	6720468P15Rik	-	RIKEN cDNA 6720468P15 gene	ncRNA
chr1	87266734	87267041	intron (NM_028889, intron 1 of 3)	intron (NM_028889, intron 1 of 3)	2534	NR_151447	98363	Mm.247951	NM_028889	ENSMUSG00000026255	Efhd1	4931430I01Rik|AI452351|PP3051|mitocalcin	EF hand domain containing 1	protein-coding
chr9	43049011	43049953	intron (NM_001359232, intron 1 of 40)	intron (NM_001359232, intron 1 of 40)	56236	NM_027144	69632	Mm.275266	NM_027144	ENSMUSG00000059495	Arhgef12	2310014B11Rik|AU019857|Larg|mKIAA0382	Rho guanine nucleotide exchange factor (GEF) 12	protein-coding
chr11	68369755	68370529	intron (NM_008744, intron 2 of 6)	B3|SINE|B2	16684	NM_008744	18208	Mm.39095	NM_008744	ENSMUSG00000020902	Ntn1	AI561871|BC019633|Netrin-1	netrin 1	protein-coding
chr12	55454637	55455530	Intergenic	MTEb|LTR|ERVL-MaLR	37564	NM_010907	18035	Mm.170515	NM_010907	ENSMUSG00000021025	Nfkbia	AI462015|Nfkbi	nuclear factor of kappa light polypeptide gene enhancer in B cells inhibitor, alpha	protein-coding
chr19	34255273	34255978	promoter-TSS (NM_007392)	promoter-TSS (NM_007392)	-252	NM_007392	11475	Mm.213025	NM_007392	ENSMUSG00000035783	Acta2	0610041G09Rik|Actvs|SMAalpha|SMalphaA|a-SMA|alphaSMA	actin, alpha 2, smooth muscle, aorta	protein-coding
chr9	57303950	57304795	Intergenic	Lx2B|LINE|L1	-41773	NM_028820	74211	Mm.428905	NM_028820	ENSMUSG00000032300	1700017B05Rik	AA682102|D9Ertd278e	RIKEN cDNA 1700017B05 gene	protein-coding
chr19	40530917	40531801	Intergenic	MTE2b|LTR|ERVL-MaLR	-17547	NM_009166	20411	Mm.210815	NM_009166	ENSMUSG00000025006	Sorbs1	2310065E01Rik|9530001P15Rik|CAP|SH3P12|Sh3d5|mKIAA1296	sorbin and SH3 domain containing 1	protein-coding
chr10	126374860	126375413	Intergenic	Intergenic	335255	NR_105841	102465224		NR_105841	ENSMUSG00000098756	Mir378d	Gm27650|mmu-mir-378d	microRNA 378d	ncRNA
chr2	103628405	103629406	intron (NM_178890, intron 1 of 16)	intron (NM_178890, intron 1 of 16)	62595	NM_178890	99382	Mm.35850	NM_178890	ENSMUSG00000032724	Abtb2	AW539457|BPOZ-2	ankyrin repeat and BTB (POZ) domain containing 2	protein-coding
chr4	86611827	86612690	promoter-TSS (NM_173400)	promoter-TSS (NM_173400)	-203	NM_173400	230376	Mm.74730	NM_173400	ENSMUSG00000038047	Haus6	6230416J20Rik|9830144E06|D4Ertd27e|mKIAA1574	HAUS augmin-like complex, subunit 6	protein-coding
chr5	21250410	21251045	intron (NM_001359876, intron 14 of 29)	intron (NM_001359876, intron 14 of 29)	64460	NR_153365	212167	Mm.121705	NM_175437	ENSMUSG00000039934	Gsap	A530088I07Rik|Pion	gamma-secretase activating protein	protein-coding
chr19	56932116	56932804	intron (NM_146102, intron 7 of 20)	intron (NM_146102, intron 7 of 20)	58044	NM_172840	240675	Mm.129534	NM_172840	ENSMUSG00000025082	Vwa2	Amaco	von Willebrand factor A domain containing 2	protein-coding
chr12	83878240	83879166	intron (NR_073563, intron 1 of 10)	MTD|LTR|ERVL-MaLR	-1891	NM_001272056	18222	Mm.4390	NM_010949	ENSMUSG00000021224	Numb	Nb	NUMB endocytic adaptor protein	protein-coding
chr13	53668957	53669404	Intergenic	Intergenic	20595	NR_131010	75252	Mm.401989	NR_131010	ENSMUSG00000113329	4930555G21Rik	-	RIKEN cDNA 4930555G21 gene	ncRNA
chr2	31706660	31707277	intron (NM_001283047, intron 2 of 11)	ID_B1|SINE|B4	18431	NM_001283047	11350	Mm.1318	NM_009594	ENSMUSG00000026842	Abl1	AI325092|Abl|E430008G22Rik|c-Abl	c-abl oncogene 1, non-receptor tyrosine kinase	protein-coding
chr11	95400277	95401084	Intergenic	Intergenic	-13403	NM_025287	20747	Mm.285454	NM_025287	ENSMUSG00000057522	Spop	AI315626|Pcif1|TEF2	speckle-type BTB/POZ protein	protein-coding
chr2	174515012	174515633	Intergenic	Intergenic	-42381	NM_025531	66390	Mm.182294	NM_025531	ENSMUSG00000016257	Prelid3b	2310042G06Rik|AA407013|Slmo2	PRELI domain containing 3B	protein-coding
chr5	147156858	147157724	Intergenic	ORR1D2|LTR|ERVL-MaLR	-31405	NM_008178	14842	Mm.4797	NM_008178	ENSMUSG00000053129	Gsx1	Gsh-1|Gsh1	GS homeobox 1	protein-coding
chr11	93809773	93810352	Intergenic	Intergenic	75704	NM_001013375	217109	Mm.379350	NM_001013375	ENSMUSG00000054079	Utp18	6230425C22Rik|6430513M13|Wdr50	UTP18 small subunit processome component	protein-coding
chr5	140527236	140527904	Intergenic	Intergenic	21961	NM_021528	59031	Mm.28934	NM_021528	ENSMUSG00000036599	Chst12	AI595374|C4S-2|C4ST2	carbohydrate sulfotransferase 12	protein-coding
chr18	55517933	55518586	Intergenic	Intergenic	-525668	NM_001360787	269023	Mm.192984	NM_175751	ENSMUSG00000052713	Zfp608	4932417D18Rik|D430007A19Rik|Znf608	zinc finger protein 608	protein-coding
chr6	118335848	118336672	Intergenic	Intergenic	-27541	NR_110507	102632423	Mm.261755	NR_110507	ENSMUSG00000107933	Gm30498	-	predicted gene, 30498	ncRNA
chr3	32441230	32441891	intron (NM_008839, intron 5 of 19)	intron (NM_008839, intron 5 of 19)	5409	NM_008839	18706	Mm.260521	NM_008839	ENSMUSG00000027665	Pik3ca	6330412C24Rik|caPI3K|p110|p110alpha	phosphatidylinositol-4,5-bisphosphate 3-kinase catalytic subunit alpha	protein-coding
chr5	52433330	52433882	intron (NM_001256059, intron 3 of 11)	intron (NM_001256059, intron 3 of 11)	-7553	NR_152197	100041805	Mm.417070	NR_152197		Gm3519	Gm43683	predicted gene 3519	ncRNA
chr8	126233906	126234618	intron (NM_001363500, intron 2 of 7)	intron (NM_001363500, intron 2 of 7)	-64317	NM_175434	210027	Mm.405238	NM_175434	ENSMUSG00000057060	Slc35f3	B230375D17Rik	solute carrier family 35, member F3	protein-coding
chr10	77101297	77101945	intron (NM_009929, intron 2 of 41)	intron (NM_009929, intron 2 of 41)	12084	NM_001109991	12822	Mm.4352	NM_009929	ENSMUSG00000001435	Col18a1	-	collagen, type XVIII, alpha 1	protein-coding
chr5	58116210	58116677	intron (NM_001310608, intron 3 of 3)	intron (NM_001310608, intron 3 of 3)	336555	NR_046190	78163	Mm.243828	NR_046190	ENSMUSG00000105234	4930459L07Rik	-	RIKEN cDNA 4930459L07 gene	ncRNA
chr19	53120427	53121365	Intergenic	Charlie4a|DNA|hAT-Charlie	-19547	NM_001164099	27360	Mm.426080	NM_013758	ENSMUSG00000025026	Add3	AI463285|R75380	adducin 3 (gamma)	protein-coding
chr11	57336793	57337006	Intergenic	(GAGAA)n|Simple_repeat|Simple_repeat	181745	NM_001168667	67726	Mm.25632	NM_026342	ENSMUSG00000020523	Fam114a2	1810073G14Rik|9030624B09Rik	family with sequence similarity 114, member A2	protein-coding
chr17	14417639	14418248	Intergenic	Intergenic	-19001	NR_027986	74917	Mm.32228	NM_183107	ENSMUSG00000117328	4930474M22Rik	-	RIKEN cDNA 4930474M22 gene	ncRNA
chr4	62932217	62932755	Intergenic	L1M4|LINE|L1	-33081	NM_028326	72701	Mm.26479	NM_028326	ENSMUSG00000028358	Zfp618	2810031P15Rik|2810040O04Rik|AI415580|AI505139|D430033D05Rik|Nedd10|Znf618|bM257P7.1	zinc finger protein 618	protein-coding
chr10	61186896	61187452	intron (NM_001017419, intron 8 of 9)	intron (NM_001017419, intron 8 of 9)	11912	NM_001017409	65971	Mm.30227	NM_023064	ENSMUSG00000020096	Tbata	1700021K02Rik|AI428928|Spatial|Titest	thymus, brain and testes associated	protein-coding
chr16	92521007	92521546	intron (NM_172469, intron 1 of 5)	intron (NM_172469, intron 1 of 5)	23129	NM_172469	209195	Mm.44747	NM_172469	ENSMUSG00000022949	Clic6	5730466J16Rik|AL022908|AW045520|CLIC1L	chloride intracellular channel 6	protein-coding
chr14	65149733	65150220	Intergenic	CpG	-51870	NM_001360385	54616	Mm.103748	NM_018788	ENSMUSG00000021978	Extl3	2900009G18Rik|AU040105|Ext1l|mKIAA0519	exostoses (multiple)-like 3	protein-coding
chr10	62858513	62859276	intron (NM_001253857, intron 3 of 12)	intron (NM_001253857, intron 3 of 12)	28430	NM_001253857	52463	Mm.17774	NM_027384	ENSMUSG00000047146	Tet1	2510010B09Rik|AA517754|BB001228|Cxxc6|D10Ertd17e|LCX|mKIAA1676	tet methylcytosine dioxygenase 1	protein-coding
chr2	5479753	5480377	intron (NM_001290375, intron 2 of 10)	intron (NM_001290375, intron 2 of 10)	100675	NR_030601	100124465		NR_030601	ENSMUSG00000078031	Mir466d	Mirn466d	microRNA 466d	ncRNA
chr5	120069900	120070552	Intergenic	Intergenic	-46287	NM_028762	74111	Mm.41022	NM_028762	ENSMUSG00000029594	Rbm19	1200009A02Rik|AV302714|NPO	RNA binding motif protein 19	protein-coding
chr19	40544653	40545207	Intergenic	Intergenic	-31118	NM_009166	20411	Mm.210815	NM_009166	ENSMUSG00000025006	Sorbs1	2310065E01Rik|9530001P15Rik|CAP|SH3P12|Sh3d5|mKIAA1296	sorbin and SH3 domain containing 1	protein-coding
chr19	56240672	56241564	Intergenic	Intergenic	-46794	NM_146101	226243	Mm.25791	NM_146101	ENSMUSG00000025075	Habp2	AI035669|FSAP|HABP|HGFAL|PHBP	hyaluronic acid binding protein 2	protein-coding
chr13	54650530	54651102	intron (NM_178397, intron 7 of 10)	intron (NM_178397, intron 7 of 10)	29032	NM_178397	76577	Mm.194459	NM_178397	ENSMUSG00000025873	Faf2	2210404D11Rik|AI462440|Ubxd8|mKIAA0887	Fas associated factor family member 2	protein-coding
chr7	38196317	38196864	3' UTR (NM_001085385, exon 4 of 4)	3' UTR (NM_001085385, exon 4 of 4)	12803	NM_028166	72244	Mm.187554	NM_028166		1600014C10Rik	AI428873	RIKEN cDNA 1600014C10 gene	protein-coding
chr10	12329456	12330154	Intergenic	RMER20C_Mm|LTR|ERVK	531930	NM_011682	22288	Mm.331784	NM_011682	ENSMUSG00000019820	Utrn	AA589569|DRP|Dmdl	utrophin	protein-coding
chr17	46071478	46072034	Intergenic	Intergenic	-39248	NM_026768	68565	Mm.287443	NM_026768	ENSMUSG00000023967	Mrps18a	1110004O20Rik|C79712	mitochondrial ribosomal protein S18A	protein-coding
chr2	141164950	141165610	intron (NM_001013802, intron 5 of 18)	intron (NM_001013802, intron 5 of 18)	-493804	NM_178382	71436	Mm.426781	NM_178382	ENSMUSG00000051379	Flrt3	5530600M07Rik|C430047I10Rik|mKIAA1469	fibronectin leucine rich transmembrane protein 3	protein-coding
chr11	98116126	98116524	intron (NM_028149, intron 2 of 14)	intron (NM_028149, intron 2 of 14)	33291	NM_028149	72194	Mm.218350	NM_028149	ENSMUSG00000020883	Fbxl20	2610511F20Rik|4632423N09Rik|AI849362|AL117906|C86145|Fbl2|Scr|mKIAA4147	F-box and leucine-rich repeat protein 20	protein-coding
chr18	7626640	7627189	promoter-TSS (NM_001161620)	promoter-TSS (NM_001161620)	-51	NM_001081287	75739	Mm.133293	NM_001081287	ENSMUSG00000057440	Mpp7	1110068J02Rik|2810038M04Rik|5430426E14Rik|AI415104|Gm955	membrane protein, palmitoylated 7 (MAGUK p55 subfamily member 7)	protein-coding
chr15	91077940	91078674	Intergenic	Intergenic	-28356	NM_001109041	16564	Mm.41379	NM_016705	ENSMUSG00000022629	Kif21a	-	kinesin family member 21A	protein-coding
chr2	180517275	180517932	intron (NM_018766, intron 1 of 3)	MTEa|LTR|ERVL-MaLR	17627	NM_018766	18216	Mm.301712	NM_018766	ENSMUSG00000027568	Ntsr1	NT-1R|NTR-1|NTR1	neurotensin receptor 1	protein-coding
chr6	56797781	56798931	promoter-TSS (NM_001362213)	promoter-TSS (NM_001362213)	-543	NM_001362213	210973	Mm.57295	NM_145958	ENSMUSG00000059486	Kbtbd2	BC022962|Bklhd1|mKIAA1489	kelch repeat and BTB (POZ) domain containing 2	protein-coding
chr1	187225959	187226835	intron (NM_001357646, intron 2 of 7)	intron (NM_001357646, intron 2 of 7)	10654	NM_001357645	67769	Mm.138321	NM_026367	ENSMUSG00000039210	Gpatch2	5830433G22Rik|5830436K05Rik|AI427714|AI447508|AW107440|AW491060|Gpatc2	G patch domain containing 2	protein-coding
chr11	97793415	97794545	Intergenic	Lx9|LINE|L1	-5585	NM_010688	16796	Mm.271967	NM_010688	ENSMUSG00000038366	Lasp1	AA408629|Def-4|LASP-1|MLN 50|SH3P6|Tg(Col1a1-lacZ)1Ngma	LIM and SH3 protein 1	protein-coding
chr8	125170680	125171707	intron (NM_174854, intron 9 of 12)	intron (NM_174854, intron 9 of 12)	116998	NM_174853	244667	Mm.233504	NM_170596	ENSMUSG00000043051	Disc1	-	disrupted in schizophrenia 1	protein-coding
chr3	32351190	32352003	intron (NM_009517, intron 2 of 5)	intron (NM_009517, intron 2 of 5)	-13893	NR_027966	67576	Mm.435324	NR_027966		4930429B21Rik	-	RIKEN cDNA 4930429B21 gene	ncRNA
chr5	100710733	100711780	intron (NM_152803, intron 2 of 11)	intron (NM_152803, intron 2 of 11)	8460	NM_152803	15442	Mm.265786	NM_152803	ENSMUSG00000035273	Hpse	HSE1|Hpa|Hpr1	heparanase	protein-coding
chr7	110661806	110662431	Intergenic	Intergenic	34461	NM_009627	11535	Mm.1408	NM_009627	ENSMUSG00000030790	Adm	AM	adrenomedullin	protein-coding
chr8	122178588	122179343	Intergenic	Intergenic	-51309	NM_001362883	195209	Mm.102191	NM_001362883		Zfp469	Gm22	zinc finger protein 469	protein-coding
chr17	3352914	3353382	intron (NM_001122998, intron 1 of 26)	intron (NM_001122998, intron 1 of 26)	26575	NM_001122998	24001	Mm.137134	NM_011878	ENSMUSG00000023800	Tiam2	3000002F19Rik|STEF|mKIAA2016	T cell lymphoma invasion and metastasis 2	protein-coding
chr10	95112100	95112765	Intergenic	Intergenic	33393	NR_131146	628062		NR_131146	ENSMUSG00000112481	Gm29684	-	predicted gene, 29684	ncRNA
chr16	64851565	64852107	promoter-TSS (NM_001347245)	promoter-TSS (NM_001347245)	-113	NM_001347245	72020	Mm.25960	NM_028059	ENSMUSG00000047141	Zfp654	1600021C16Rik|1810008K20Rik|433036|Gm5488|Znf654	zinc finger protein 654	protein-coding
chr18	73530537	73531332	Intergenic	(TTAG)n|Simple_repeat|Simple_repeat	-41771	NM_001039214	240396	Mm.24131	NM_001039214	ENSMUSG00000037253	Mex3c	A130001D14Rik|BC035207|BM-013|Rkhd2	mex3 RNA binding family member C	protein-coding
chr1	171327731	171328135	promoter-TSS (NM_001357550)	promoter-TSS (NM_001357550)	-875	NM_001357550	21945	Mm.270139	NM_011615	ENSMUSG00000013973	Dedd	CASP8IP1|DEFT|Dedpro1|FLDED1|KE05	death effector domain-containing	protein-coding
chr10	85271015	85271809	Intergenic	Intergenic	-86358	NM_007771	12952	Mm.26237	NM_007771	ENSMUSG00000020038	Cry1	AU020726|AU021000|Phll1	cryptochrome 1 (photolyase-like)	protein-coding
chr19	25301996	25302613	intron (NM_181404, intron 2 of 13)	intron (NM_181404, intron 2 of 13)	65329	NM_001348180	107351	Mm.260722	NM_181404	ENSMUSG00000032702	Kank1	A930031B09Rik|AU015049|AW121052|Ankrd15|D330024H06Rik|mKIAA0172	KN motif and ankyrin repeat domains 1	protein-coding
chr11	57383971	57384651	Intergenic	Intergenic	134333	NM_001168667	67726	Mm.25632	NM_026342	ENSMUSG00000020523	Fam114a2	1810073G14Rik|9030624B09Rik	family with sequence similarity 114, member A2	protein-coding
chr10	9342260	9343087	Intergenic	MER57C2|LTR|ERV1	332535	NM_177271	320825	Mm.101115	NM_177271	ENSMUSG00000060487	Samd5	E130306M17Rik	sterile alpha motif domain containing 5	protein-coding
chr9	95774705	95775188	intron (NM_001033210, intron 9 of 15)	intron (NM_001033210, intron 9 of 15)	-24598	NM_001311123	22063	Mm.149633	NM_011643	ENSMUSG00000032839	Trpc1	Mtrp1|Trp1|Trrp1	transient receptor potential cation channel, subfamily C, member 1	protein-coding
chr10	122571005	122572028	Intergenic	Intergenic	-1625	NR_040616	319272	Mm.411763	NR_040616	ENSMUSG00000112095	A130077B15Rik	-	RIKEN cDNA A130077B15 gene	ncRNA
chr17	86470051	86470510	intron (NM_011104, intron 2 of 14)	MTEb|LTR|ERVL-MaLR	-183102	NR_045435	72104	Mm.443401	NR_045435	ENSMUSG00000100738	2010106C02Rik	-	RIKEN cDNA 2010106C02 gene	ncRNA
chr15	82312934	82313466	intron (NM_029066, intron 5 of 5)	Lx7|LINE|L1	14216	NM_029066	74716	Mm.159315	NM_029066	ENSMUSG00000022455	Wbp2nl	4930521I23Rik|PAWP	WBP2 N-terminal like	protein-coding
chr5	141255317	141256160	intron (NM_177879, intron 1 of 44)	L1MA8|LINE|L1	14204	NM_177879	330222	Mm.151931	NM_177879	ENSMUSG00000039683	Sdk1	5330440E10|6720466O15Rik	sidekick cell adhesion molecule 1	protein-coding
chr9	64671730	64672149	intron (NM_172522, intron 9 of 22)	C-rich|Low_complexity|Low_complexity	65817	NM_017382	53869	Mm.1387	NM_017382	ENSMUSG00000004771	Rab11a	-	RAB11A, member RAS oncogene family	protein-coding
chr15	85634310	85634849	Intergenic	CpG	-52758	NM_009528	22422	Mm.306946	NM_009528	ENSMUSG00000022382	Wnt7b	Wnt-7b	wingless-type MMTV integration site family, member 7B	protein-coding
chr1	37509979	37510669	intron (NM_173870, intron 2 of 15)	intron (NM_173870, intron 2 of 15)	-21719	NR_024017	77633	Mm.483177	NR_024017	ENSMUSG00000103948	4930594C11Rik	-	G1 to S phase transition pseudogene	pseudo
chr8	24109867	24110891	Intergenic	RMER21B|LTR|ERV1	328567	NM_026931	69068	Mm.25775	NM_026931	ENSMUSG00000056313	Tcim	1110065B09Rik|1810011O10Rik|AW121743|AW321058	transcriptional and immune response regulator	protein-coding
chr7	101037381	101038301	Intergenic	L1MC3|LINE|L1	-25788	NM_001302346	18442	Mm.3000	NM_008773	ENSMUSG00000032860	P2ry2	P2U1|P2Y2	purinergic receptor P2Y, G-protein coupled 2	protein-coding
chr1	185001236	185001911	Intergenic	Intergenic	-2024	NM_145515	226778	Mm.7445	NM_145515	ENSMUSG00000026620	Mark1	AW491150|B930025N23Rik|Emk3|Par-1c|mKIAA1477|mPar-1c	MAP/microtubule affinity regulating kinase 1	protein-coding
chr10	23959908	23960690	promoter-TSS (NM_001008499)	promoter-TSS (NM_001008499)	-195	NM_001008499	209513	Mm.300612	NM_001008499	ENSMUSG00000069707	Taar4	Gm226|Ta2|taR-4	trace amine-associated receptor 4	protein-coding
chr5	106012468	106013413	Intergenic	Intergenic	136372	NM_018759	54367	Mm.248876	NM_018759	ENSMUSG00000029290	Zfp326	5730470H14Rik|ZAN75|Znf326	zinc finger protein 326	protein-coding
chr12	10285701	10286306	Intergenic	Lx8b|LINE|L1	-83968	NM_027588	70881	Mm.272843	NM_027588	ENSMUSG00000020622	Nt5c1b	4921514H13Rik|AIRP|CN-IB|cN1B	5'-nucleotidase, cytosolic IB	protein-coding
chr6	147657486	147658324	Intergenic	MTEa|LTR|ERVL-MaLR	-32336	NR_033636	100039727	Mm.396220	NR_033636	ENSMUSG00000085077	1700049E15Rik	Gm15761	RIKEN cDNA 1700049E15 gene	ncRNA
chr17	29643503	29644232	intron (NR_132314, intron 7 of 27)	B4|SINE|B4	-16728	NM_028791	74157	Mm.390979	NM_028791	ENSMUSG00000024019	Cmtr1	1300018I05Rik|AI451264|Ftsjd2|MTr1	cap methyltransferase 1	protein-coding
chr5	148949414	148950262	promoter-TSS (NR_040686)	promoter-TSS (NR_040686)	-412	NR_040686	71473	Mm.90306	NR_040686	ENSMUSG00000079069	8430423G03Rik	-	RIKEN cDNA 8430423G03 gene	ncRNA
chr5	104434080	104434836	promoter-TSS (NM_001204202)	promoter-TSS (NM_001204202)	-653	NM_001204203	20750	Mm.288474	NM_009263	ENSMUSG00000029304	Spp1	2AR|Apl-1|BNSP|BSPI|Bsp|ETA-1|Eta|OP|Opn|Opnl|Ric|Spp-1	secreted phosphoprotein 1	protein-coding
chr19	55346612	55347351	intron (NM_001360431, intron 3 of 8)	intron (NM_001360431, intron 3 of 8)	30924	NM_001360431	53611	Mm.258637	NM_016862	ENSMUSG00000024983	Vti1a	1110014F16Rik|1110018K19Rik|4921537J05Rik|MVti1|MVti1a|Vti1|Vti1-rp2	vesicle transport through interaction with t-SNAREs 1A	protein-coding
chr14	78365798	78366375	Intergenic	Intergenic	-58043	NM_011613	21943	Mm.249221	NM_011613	ENSMUSG00000022015	Tnfsf11	Ly109l|ODF|OPGL|RANKL|Trance	tumor necrosis factor (ligand) superfamily, member 11	protein-coding
chr1	34140264	34141067	intron (NM_001276764, intron 9 of 102)	intron (NM_001276764, intron 9 of 102)	-19595	NM_010081	13518	Mm.336625	NM_010081	ENSMUSG00000026131	Dst	2310001O04Rik|A830042E19Rik|AW554249|BP230|BPAG1-n|Bpag|Bpag1|Macf2|ah|athetoid|dt|mKIAA0728|nmf203|nmf339	dystonin	protein-coding
chr12	102424541	102425024	intron (NM_011175, intron 1 of 13)	RMER5|LTR|ERV1	15031	NM_011175	19141	Mm.17185	NM_011175	ENSMUSG00000021190	Lgmn	AEP|AI746452|AU022324|Prsc1	legumain	protein-coding
chr15	86003035	86003441	intron (NM_009886, intron 1 of 34)	intron (NM_009886, intron 1 of 34)	30539	NM_009886	12614	Mm.22680	NM_009886	ENSMUSG00000016028	Celsr1	Adgrc1|Crsh|Scy|crash	cadherin, EGF LAG seven-pass G-type receptor 1	protein-coding
chr19	57072528	57073334	intron (NM_001362445, intron 8 of 20)	intron (NM_001362445, intron 8 of 20)	46093	NM_001347459	226251	Mm.217161	NM_178688	ENSMUSG00000025085	Ablim1	2210411C18Rik|2610209L21Rik|4833406P10Rik|9330196J19Rik|AV079770|AW060987|AW215784|Limab1|mKIAA0059	actin-binding LIM protein 1	protein-coding
chr7	66689247	66690414	promoter-TSS (NR_034030)	promoter-TSS (NR_034030)	-59	NM_001191001	72635	Mm.289796	NM_152815	ENSMUSG00000053091	Lins1	2700083B01Rik|AW547219|Lins|Lins2|Wins2	lines homolog 1	protein-coding
chr1	164447231	164448074	intron (NM_009721, intron 2 of 5)	intron (NM_009721, intron 2 of 5)	10703	NM_009721	11931	Mm.4550	NM_009721	ENSMUSG00000026576	Atp1b1	Atp4b|Atpb|Atpb-1|NKbeta1	ATPase, Na+/K+ transporting, beta 1 polypeptide	protein-coding
chr9	116776244	116777191	intron (NM_001172123, intron 6 of 14)	MTE2b|LTR|ERVL-MaLR	475766	NM_001172122	207181	Mm.326411	NM_178660	ENSMUSG00000039607	Rbms3	6720477E09Rik|8430436O14Rik	RNA binding motif, single stranded interacting protein	protein-coding
chr5	107160638	107161380	intron (NM_011578, intron 4 of 16)	intron (NM_011578, intron 4 of 16)	128620	NM_011578	21814	Mm.200775	NM_011578	ENSMUSG00000029287	Tgfbr3	1110036H20Rik|AU015626|AW215636|TBRIII	transforming growth factor, beta receptor III	protein-coding
chr18	63280245	63280802	intron (NM_001039485, intron 2 of 53)	intron (NM_001039485, intron 2 of 53)	106660	NM_001039485	667742	Mm.158720	NM_172629	ENSMUSG00000041482	Piezo2	5930434P17|9030411M15Rik|9430028L06Rik|Fam38b|Fam38b2	piezo-type mechanosensitive ion channel component 2	protein-coding
chr1	34292136	34292854	intron (NM_001276764, intron 92 of 102)	intron (NM_001276764, intron 92 of 102)	132235	NM_010081	13518	Mm.336625	NM_010081	ENSMUSG00000026131	Dst	2310001O04Rik|A830042E19Rik|AW554249|BP230|BPAG1-n|Bpag|Bpag1|Macf2|ah|athetoid|dt|mKIAA0728|nmf203|nmf339	dystonin	protein-coding
chr1	36056612	36057411	Intergenic	B4|SINE|B4	-11389	NM_015818	50785	Mm.213566	NM_015818	ENSMUSG00000045216	Hs6st1	6Ost1	heparan sulfate 6-O-sulfotransferase 1	protein-coding
chr10	41978715	41980032	intron (NM_001034858, intron 6 of 17)	PB1D10|SINE|Alu	39009	NM_001034858	213402	Mm.211320	NM_001034858	ENSMUSG00000071324	Armc2	2610018I05Rik	armadillo repeat containing 2	protein-coding
chr1	60853208	60853894	Intergenic	Intergenic	-55474	NM_001281976	12477	Mm.390	NM_009843	ENSMUSG00000026011	Ctla4	Cd152|Ctla-4|Ly-56	cytotoxic T-lymphocyte-associated protein 4	protein-coding
chr17	71815426	71815828	intron (NM_175378, intron 8 of 13)	intron (NM_175378, intron 8 of 13)	33680	NM_030179	78785	Mm.196382	NM_030179	ENSMUSG00000024059	Clip4	1700024K14Rik|1700074B05Rik|4833417L20Rik|5830409B12Rik|Rsnl2	CAP-GLY domain containing linker protein family, member 4	protein-coding
chr13	12274271	12274889	intron (NM_033268, intron 18 of 20)	intron (NM_033268, intron 18 of 20)	-16467	NM_001081128	238505	Mm.40335	NM_001081128	ENSMUSG00000021311	Mtr	AI894170|D830038K18Rik|MS	5-methyltetrahydrofolate-homocysteine methyltransferase	protein-coding
chr15	82902056	82902934	intron (NR_045068, intron 3 of 3)	intron (NR_045068, intron 3 of 3)	3415	NR_045068	100504637	Mm.440928	NR_045068	ENSMUSG00000100199	Gm20324	-	predicted gene, 20324	ncRNA
chr5	107104673	107105384	Intergenic	Intergenic	140467	NM_001271566	12545	Mm.20842	NM_009863	ENSMUSG00000029283	Cdc7	AI597260|Cdc7l1|muCdc7	cell division cycle 7 (S. cerevisiae)	protein-coding
chr18	60890269	60890902	Intergenic	URR1A|DNA|hAT-Charlie	-21406	NM_001038499	545260	Mm.20147	NM_001038499	ENSMUSG00000036412	Arsi	BC020108	arylsulfatase i	protein-coding
chr14	86198976	86199194	Intergenic	(TTAGGG)n|Simple_repeat|Simple_repeat	-46885	NR_040457	75155	Mm.399239	NR_040457	ENSMUSG00000115271	4930529K09Rik	4930507G21Rik	RIKEN cDNA 4930529K09 gene	ncRNA
chr4	74003683	74003896	Intergenic	(GAGAA)n|Simple_repeat|Simple_repeat	-9814	NM_001163732	242506	Mm.221597	NM_172869	ENSMUSG00000049122	Frmd3	4.1O|9430066I12Rik|EPB41L4O|P410	FERM domain containing 3	protein-coding
chr4	145594657	145594860	intron (NM_001324416, intron 1 of 3)	(TTCTC)n|Simple_repeat|Simple_repeat	9558	NM_001324416	433801	Mm.276881	NM_001013808	ENSMUSG00000078502	Gm13212	-	predicted gene 13212	protein-coding
chr3	96044547	96045000	intron (NM_013841, intron 7 of 14)	intron (NM_013841, intron 7 of 14)	13682	NM_013841	22365	Mm.263185	NM_013841	ENSMUSG00000015747	Vps45	AI462172|AW554165|mVps45	vacuolar protein sorting 45	protein-coding
chr18	83240120	83240914	Intergenic	Tigger6a|DNA|TcMar-Tigger	85367	NR_045361	70960	Mm.410834	NR_045361	ENSMUSG00000118333	4921531P14Rik	1700108N05Rik	RIKEN cDNA 4921531P14 gene	ncRNA
chr6	16834583	16834921	intron (NM_031198, intron 6 of 6)	intron (NM_031198, intron 6 of 6)	57228	NR_157239	102640655		NR_157239	ENSMUSG00000107022	Gm36669	-	predicted gene, 36669	ncRNA
chr12	89823209	89823665	intron (NM_001252074, intron 1 of 6)	intron (NM_001252074, intron 1 of 6)	10954	NM_001252074	18191	Mm.425766	NM_172544	ENSMUSG00000066392	Nrxn3	-	neurexin III	protein-coding
chr5	28036370	28036573	Intergenic	(GAGAA)n|Simple_repeat|Simple_repeat	-34941	NM_153526	231070	Mm.30221	NM_153526	ENSMUSG00000045294	Insig1	1810013C12Rik|Insig-1	insulin induced gene 1	protein-coding
chr1	115114325	115114554	Intergenic	(GA)n|Simple_repeat|Simple_repeat	-570298	NM_001077425	636808	Mm.101576	NM_001077425	ENSMUSG00000070695	Cntnap5a	Caspr5-1|EG636808	contactin associated protein-like 5A	protein-coding
chr17	28462591	28463390	intron (NM_010220, intron 1 of 10)	L1M4|LINE|L1	23159	NM_010220	14229	Mm.276405	NM_010220	ENSMUSG00000024222	Fkbp5	D17Ertd592e|Dit1|FKBP-5|FKBP51	FK506 binding protein 5	protein-coding
chr9	46842309	46842514	Intergenic	(TTCTC)n|Simple_repeat|Simple_repeat	-71192	NR_015605	73040	Mm.265384	NR_015605	ENSMUSG00000099696	2900052N01Rik	AU067665	RIKEN cDNA 2900052N01 gene	ncRNA
chr13	5831923	5832639	Intergenic	Intergenic	25811	NR_045891	71867	Mm.179181	NR_045891	ENSMUSG00000100625	1700016G22Rik	-	RIKEN cDNA 1700016G22 gene	ncRNA
chr5	66797959	66798684	intron (NM_001001980, intron 1 of 25)	intron (NM_001001980, intron 1 of 25)	52432	NM_001001980	77569	Mm.374778	NM_001001980	ENSMUSG00000037736	Limch1	3732412D22Rik|mKIAA1102	LIM and calponin homology domains 1	protein-coding
chr13	70047734	70048302	intron (NR_131156, intron 2 of 2)	intron (NR_131156, intron 2 of 2)	-19670	NR_045965	74280	Mm.273343	NR_045965	ENSMUSG00000099639	1700084F23Rik	1700003E18Rik|4930589D02Rik	RIKEN cDNA 1700084F23 gene	ncRNA
chr5	112276239	112276880	promoter-TSS (NM_009419)	promoter-TSS (NM_009419)	-186	NM_001326590	22022	Mm.250631	NM_009419	ENSMUSG00000029344	Tpst2	AI448750|D5Ucla3|Tango13b|grm|grt	protein-tyrosine sulfotransferase 2	protein-coding
chr14	79587567	79589041	intron (NM_026474, intron 2 of 12)	intron (NM_026474, intron 2 of 12)	644	NM_026474	67955	Mm.18972	NM_026474	ENSMUSG00000022024	Sugt1	2410174K12Rik|SGT1	SGT1, suppressor of G2 allele of SKP1 (S. cerevisiae)	protein-coding
chr1	9852938	9854142	intron (NM_001037759, intron 1 of 16)	intron (NM_001037759, intron 1 of 16)	5259	NM_001037759	170755	Mm.336410	NM_133220	ENSMUSG00000025915	Sgk3	2510015P22Rik|A330005P07Rik|Cisk|fy|fz	serum/glucocorticoid regulated kinase 3	protein-coding
chr16	33745044	33745713	intron (NM_175256, intron 10 of 14)	intron (NM_175256, intron 10 of 14)	-48659	NM_010739	17063	Mm.3177	NM_010739	ENSMUSG00000022824	Muc13	114/A10|14/A10|AI159736|Lrrp|Ly64|NJ-1	mucin 13, epithelial transmembrane	protein-coding
chr1	30886979	30887358	Intergenic	Intergenic	-23912	NM_001081080	213109	Mm.194486	NM_025871	ENSMUSG00000048874	Phf3	2310061N19Rik	PHD finger protein 3	protein-coding
chr8	124961944	124962353	Intergenic	PB1D10|SINE|Alu	-12894	NM_001363475	112405	Mm.140619	NM_053207	ENSMUSG00000031987	Egln1	AI503754|C1orf12|HIF-PH2|HPH-2|Hif-p4h-2|ORF13|Phd2|SM-20	egl-9 family hypoxia-inducible factor 1	protein-coding
chr19	58867771	58868630	intron (NM_001327998, intron 2 of 12)	intron (NM_001327998, intron 2 of 12)	-7216	NM_175199	73442	Mm.39739	NM_175199	ENSMUSG00000025092	Hspa12a	1700063D12Rik|AI118035|AI840429|AW048913|AW556406|D5Mgi40|Gm19925|mKIAA0417	heat shock protein 12A	protein-coding
chr6	91809832	91810832	Intergenic	L2a|LINE|L2	-2939	NM_001159507	243547	Mm.333264	NM_001033353	ENSMUSG00000030098	Grip2	-	glutamate receptor interacting protein 2	protein-coding
chr10	128062202	128062737	intron (NM_019766, intron 1 of 7)	intron (NM_019766, intron 1 of 7)	3487	NM_019766	56351	Mm.305816	NM_019766	ENSMUSG00000071072	Ptges3	5730442A20Rik|Ptges|Tebp|cPGES|p23|sid3177	prostaglandin E synthase 3	protein-coding
chr18	68204707	68205537	intron (NM_172631, intron 3 of 5)	MTD|LTR|ERVL-MaLR	-22824	NM_001357444	52662	Mm.440183	NM_172631	ENSMUSG00000024544	Ldlrad4	8230401C20Rik|A430083H02|A430108L08Rik|C18orf1|D18Ertd653e|D330030L18Rik	low density lipoprotein receptor class A domain containing 4	protein-coding
chr2	163194248	163195051	Intergenic	Intergenic	-9537	NM_001363063	269389	Mm.207709	NM_001098799	ENSMUSG00000074607	Tox2	AI851523|AV026525|BI987407|Gcx1|RxHMG1	TOX high mobility group box family member 2	protein-coding
chr13	55384589	55385323	TTS (NM_001360714)	TTS (NM_001360714)	-14692	NM_011392	20505	Mm.276355	NM_011392	ENSMUSG00000021490	Slc34a1	NaPi-IIa|Npt2|Npt2a|Slc17a2	solute carrier family 34 (sodium phosphate), member 1	protein-coding
chr18	78317242	78318001	intron (NM_030683, intron 3 of 11)	intron (NM_030683, intron 3 of 11)	-111181	NM_001110274	27411	Mm.44158	NM_030683	ENSMUSG00000024552	Slc14a2	UT-A1|UT-A3	solute carrier family 14 (urea transporter), member 2	protein-coding
chr6	82774327	82774676	promoter-TSS (NM_013820)	promoter-TSS (NM_013820)	-47	NM_013820	15277	Mm.255848	NM_013820	ENSMUSG00000000628	Hk2	AI642394|HKII	hexokinase 2	protein-coding
chr8	126804473	126805348	Intergenic	Intergenic	-44110	NR_151740	414091	Mm.240068	NM_001033546		A630001O12Rik	Gm45803	RIKEN cDNA A630001O12 gene	ncRNA
chr12	104987729	104988599	intron (NM_172500, intron 1 of 16)	intron (NM_172500, intron 1 of 16)	10513	NM_001042699	212073	Mm.212688	NM_172500	ENSMUSG00000054150	Syne3	KASH3|nesprin-3	spectrin repeat containing, nuclear envelope family member 3	protein-coding
chr19	55094747	55095195	intron (NM_001356285, intron 5 of 22)	intron (NM_001356285, intron 5 of 22)	4506	NM_008149	14732	Mm.210196	NM_008149	ENSMUSG00000024978	Gpam	GPAT|GPAT-1|GPAT1|P90	glycerol-3-phosphate acyltransferase, mitochondrial	protein-coding
chr8	94725763	94726308	Intergenic	Intergenic	-19649	NM_009137	20299	Mm.12895	NM_009137	ENSMUSG00000031779	Ccl22	ABCD-1|DCBCK|MDC|Scya22	chemokine (C-C motif) ligand 22	protein-coding
chr3	85987201	85987722	Intergenic	Intergenic	15070	NM_001001650	368202	Mm.253822	NM_001001650	ENSMUSG00000049013	Prss48	Esspl|Gm1019	protease, serine 48	protein-coding
chr6	98067239	98067944	Intergenic	Intergenic	75808	NM_008601	17342	Mm.333284	NM_008601	ENSMUSG00000035158	Mitf	BCC2|Bhlhe32|Gsfbcc2|Vitiligo|Wh|bw|mi|vit	melanogenesis associated transcription factor	protein-coding
chr9	37930083	37930395	Intergenic	(CCTTG)n|Simple_repeat|Simple_repeat	11691	NM_146798	258794	Mm.377695	NM_146798	ENSMUSG00000066747	Olfr878	MOR163-1	olfactory receptor 878	protein-coding
chr11	49964304	49965036	intron (NM_029004, intron 6 of 13)	L1M5|LINE|L1	-60661	NM_001290749	59044	Mm.359004	NM_021540	ENSMUSG00000020376	Rnf130	2510042A13Rik|G1RZFP|G1rp|GOLIATH|GP	ring finger protein 130	protein-coding
chr1	86066488	86066955	intron (NM_027357, intron 1 of 24)	intron (NM_027357, intron 1 of 24)	2102	NM_027357	70247	Mm.280013	NM_027357	ENSMUSG00000026229	Psmd1	2410026J11Rik|P112|S1	proteasome (prosome, macropain) 26S subunit, non-ATPase, 1	protein-coding
chr9	41472507	41472933	intron (NR_131928, intron 3 of 4)	intron (NR_131928, intron 3 of 4)	-2173	NR_131931	73144	Mm.38166	NM_001033153	ENSMUSG00000074415	Mir100hg	2610203C20Rik|3110039I08Rik|AI848448|D230004N17Rik|D3Mgi9	Mir100 Mirlet7a-2 Mir125b-1 cluster host gene	ncRNA
chr10	76625230	76625666	Intergenic	Intergenic	-1818	NM_001347207	12834	Mm.1949	NM_146007	ENSMUSG00000020241	Col6a2	Col6a-2	collagen, type VI, alpha 2	protein-coding
chr6	112993773	112994324	Intergenic	Lx9|LINE|L1	-46782	NM_080448	259302	Mm.236401	NM_080448	ENSMUSG00000030257	Srgap3	AI452337|Arhgap14|D130026O08Rik|Gbi|MEGAP|WRP|mKIAA0411	SLIT-ROBO Rho GTPase activating protein 3	protein-coding
chr5	111835667	111836600	Intergenic	Intergenic	-74405	NR_045833	269683	Mm.136946	NM_207252	ENSMUSG00000085271	E130006D01Rik	Gm16018|Gm681	RIKEN cDNA E130006D01 gene	ncRNA
chr2	32542244	32542819	intron (NM_153560, intron 1 of 10)	intron (NM_153560, intron 1 of 10)	7172	NM_153560	98952	Mm.4065	NM_153560	ENSMUSG00000039157	Fam102a	AI426465|C230093N12Rik|Eeig1	family with sequence similarity 102, member A	protein-coding
chr5	132706181	132707043	Intergenic	MER2|DNA|TcMar-Tigger	-163392	NM_001363480	319974	Mm.409595	NM_177047	ENSMUSG00000029673	Auts2	2700063G02Rik|A730011F23Rik|D830032G16Rik	autism susceptibility candidate 2	protein-coding
chr18	60761803	60762690	Intergenic	Intergenic	-12350	NM_020600	20044	Mm.43778	NM_020600	ENSMUSG00000024608	Rps14	2600014J02Rik|AL023078	ribosomal protein S14	protein-coding
chr4	137967265	137968086	Intergenic	YREP_Mm|Unknown|Unknown	-25780	NM_001369131	230861	Mm.268903	NM_172703	ENSMUSG00000028760	Eif4g3	1500002J22Rik|4930523M17Rik|G1-419-52|Gm32394|eIF4GII|repro8	eukaryotic translation initiation factor 4 gamma, 3	protein-coding
chr19	24258508	24259372	TTS (NM_008044)	TTS (NM_008044)	21650	NM_008044	14297	Mm.7319	NM_008044	ENSMUSG00000059363	Fxn	FA|FARR|Frda|X25	frataxin	protein-coding
chr11	114818582	114819818	Intergenic	MTE2a|LTR|ERVL-MaLR	20276	NM_001346772	217302	Mm.269127	NM_181749	ENSMUSG00000034677	Gpr142	PGR2	G protein-coupled receptor 142	protein-coding
chr19	53691288	53691921	intron (NM_001170847, intron 1 of 13)	intron (NM_001170847, intron 1 of 13)	14298	NM_001170847	73713	Mm.313695	NM_001170847	ENSMUSG00000043639	Rbm20	1110018J23Rik|2010003H22Rik|AI646761	RNA binding motif protein 20	protein-coding
chr1	38947351	38947927	intron (NM_001011684, intron 8 of 9)	intron (NM_001011684, intron 8 of 9)	8490	NM_001011684	433292	Mm.333709	NM_001011684	ENSMUSG00000067604	Nms	AB164466	neuromedin S	protein-coding
chr4	11098714	11099411	Intergenic	Intergenic	-22857	NM_001085493	76947	Mm.275265	NM_001085493	ENSMUSG00000050323	Ndufaf6	2310030N02Rik	NADH:ubiquinone oxidoreductase complex assembly factor 6	protein-coding
chr1	97625516	97626578	Intergenic	Intergenic	35629	NM_001355072	52392	Mm.12309	NM_133825	ENSMUSG00000044768	D1Ertd622e	AI987691|AW047450	DNA segment, Chr 1, ERATO Doi 622, expressed	protein-coding
chr4	99978500	99979009	intron (NM_028132, intron 7 of 10)	intron (NM_028132, intron 7 of 10)	49303	NM_028132	72157	Mm.217764	NM_028132	ENSMUSG00000025791	Pgm2	2610020G18Rik|AA407108|AI098105|Pgm-2|Pgm1	phosphoglucomutase 2	protein-coding
chr15	31140933	31141656	Intergenic	Intergenic	-83091	NM_146057	223453	Mm.222867	NM_146057	ENSMUSG00000039168	Dap	4921531N22Rik|AI789753|AU040360	death-associated protein	protein-coding
chr10	126836151	126836915	Intergenic	RLTR49|LTR|ERVK	-42823	NR_131015	75813	Mm.159583	NR_131015	ENSMUSG00000112832	4930484H19Rik	-	RIKEN cDNA 4930484H19 gene	ncRNA
chr14	45432967	45433530	Intergenic	Intergenic	-44452	NM_019425	54342	Mm.312945	NM_019425	ENSMUSG00000037722	Gnpnat1	AU017428|AU040593|EMeg32|Gpnat1|Gsnpat	glucosamine-phosphate N-acetyltransferase 1	protein-coding
chr7	121718384	121718971	Intergenic	ID_B1|SINE|B4	-11235	NM_001033173	76179	Mm.122538	NM_001033173	ENSMUSG00000063317	Usp31	6330567E21Rik|mKIAA1203	ubiquitin specific peptidase 31	protein-coding
chr7	46546617	46547452	intron (NM_013789, intron 9 of 10)	intron (NM_013789, intron 9 of 10)	92773	NM_013789	27414	Mm.76659	NM_013789	ENSMUSG00000030839	Sergef	DelGEF|Gef|Gnef|Gnefr	secretion regulating guanine nucleotide exchange factor	protein-coding
chr3	79299212	79299904	Intergenic	ID_B1|SINE|B4	-45813	NM_001142953	100233207	Mm.373801	NM_001142953	ENSMUSG00000091685	Gm17359	-	predicted gene, 17359	protein-coding
chr5	129155747	129156750	intron (NM_001081342, intron 14 of 25)	intron (NM_001081342, intron 14 of 25)	59498	NM_001347486	243277	Mm.440501	NM_177734	ENSMUSG00000044017	Adgrd1	E230012M21Rik|Gpr133	adhesion G protein-coupled receptor D1	protein-coding
chr16	17760750	17761376	intron (NM_145479, intron 1 of 6)	intron (NM_145479, intron 1 of 6)	1442	NM_001359068	224023	Mm.282807	NM_145479	ENSMUSG00000022750	Klhl22	2610318I18Rik|Kelchl	kelch-like 22	protein-coding
chr9	96173514	96174387	intron (NM_001368879, intron 12 of 15)	(A)n|Simple_repeat|Simple_repeat	-22325	NM_001184708	211586	Mm.17977	NM_178667	ENSMUSG00000032411	Tfdp2	1110029I05Rik|A330080J22Rik|DP-3|DP3	transcription factor Dp 2	protein-coding
chr8	86255089	86255927	Intergenic	Intergenic	311082	NM_172912	244562	Mm.67485	NM_172912	ENSMUSG00000036872	Abcc12	4930467B22Rik|MRP9	ATP-binding cassette, sub-family C (CFTR/MRP), member 12	protein-coding
chr8	14664343	14665127	intron (NM_001145965, intron 3 of 14)	MLT1C|LTR|ERVL-MaLR	-223801	NM_012000	26889	Mm.254027	NM_012000	ENSMUSG00000026317	Cln8	mnd	ceroid-lipofuscinosis, neuronal 8	protein-coding
chr5	148016255	148016720	intron (NM_029920, intron 1 of 14)	intron (NM_029920, intron 1 of 14)	59167	NM_001359503	77521	Mm.244177	NM_029920	ENSMUSG00000029651	Mtus2	5730592G18Rik|A730013O20Rik|AU067634|C130038G02Rik|Cazip|Gm763|mKIAA0774	microtubule associated tumor suppressor candidate 2	protein-coding
chr5	90714256	90715058	Intergenic	ORR1E|LTR|ERVL-MaLR	-44641	NM_009141	20311	Mm.4660	NM_009141	ENSMUSG00000029371	Cxcl5	AMCF-II|Cxcl6|ENA-78|GCP-2|LIX|Scyb5|Scyb6	chemokine (C-X-C motif) ligand 5	protein-coding
chr7	30475834	30476358	intron (NM_019459, intron 22 of 29)	ZP3AR|Satellite|Satellite	-10505	NR_004443	445267	Mm.398140	NR_004443	ENSMUSG00000087009	Nphs1os	Nphs1as	nephrosis 1 homolog, nephrin, opposite strand	ncRNA
chr10	99020229	99020952	intron (NM_001359508, intron 21 of 21)	intron (NM_001359508, intron 21 of 21)	-86492	NR_153333	382406	Mm.440656	NM_027740	ENSMUSG00000019952	Poc1b	4933430F16Rik|Wdr51b	POC1 centriolar protein B	protein-coding
chr1	34074316	34075089	intron (NM_134448, intron 1 of 97)	intron (NM_134448, intron 1 of 97)	-42657	NR_105861	102466987		NR_105861	ENSMUSG00000105982	Mir6896	mmu-mir-6896	microRNA 6896	ncRNA
chr14	6700656	6701468	Intergenic	Intergenic	55995	NM_001309401	100041151	Mm.396155	NM_001309401	ENSMUSG00000091754	Gm3636	100042043	predicted gene 3636	protein-coding
chr3	22126647	22127268	intron (NM_030732, intron 1 of 15)	intron (NM_030732, intron 1 of 15)	50305	NM_030732	81004	Mm.202966	NM_030732	ENSMUSG00000027630	Tbl1xr1	8030499H02Rik|A630076E03Rik|AW539987|C21|C230089I12Rik|DC42|Ira1|TBLR1	transducin (beta)-like 1X-linked receptor 1	protein-coding
chr16	89938190	89938888	intron (NM_001145886, intron 2 of 27)	intron (NM_001145886, intron 2 of 27)	22288	NM_009384	21844	Mm.310902	NM_009384	ENSMUSG00000002489	Tiam1	AI847750|D16Ium10|D16Ium10e	T cell lymphoma invasion and metastasis 1	protein-coding
chr17	69204046	69204837	intron (NM_001355734, intron 1 of 22)	intron (NM_001355734, intron 1 of 22)	45085	NM_001355734	13823	Mm.131135	NM_013813	ENSMUSG00000024044	Epb41l3	4.1B|DAL1P|Dal1|Epb4.1l3|NBL3	erythrocyte membrane protein band 4.1 like 3	protein-coding
chr19	58178488	58179305	Intergenic	Intergenic	-117308	NR_040449	791347	Mm.452208	NR_040449		Gm10007	-	predicted gene 10007	ncRNA
chr14	7537726	7538140	Intergenic	ID4_|SINE|ID	30633	NM_001270842	100041874	Mm.350858	NM_001270842	ENSMUSG00000079364	Gm3558	-	predicted gene 3558	protein-coding
chr15	28017152	28017958	intron (NM_001081302, intron 1 of 56)	intron (NM_001081302, intron 1 of 56)	8293	NM_001081302	223435	Mm.485422	NM_001081302	ENSMUSG00000022263	Trio	6720464I07Rik|AA408740|Solo	triple functional domain (PTPRF interacting)	protein-coding
chr4	155323858	155324277	intron (NM_008860, intron 4 of 17)	MTE2b|LTR|ERVL-MaLR	20682	NM_001355178	18762	Mm.28561	NM_008860	ENSMUSG00000029053	Prkcz	AI098070|C80388|Pkcz|R74924|aPKCzeta|nPKC-zeta|zetaPKC	protein kinase C, zeta	protein-coding
chr5	113979233	113979928	intron (NM_198109, intron 2 of 14)	intron (NM_198109, intron 2 of 14)	14210	NM_001363469	231637	Mm.389682	NM_198109	ENSMUSG00000042121	Ssh1	AW551225|Gm1394|Gm1395|SSH-1|SSH-1L	slingshot protein phosphatase 1	protein-coding
chr13	55412217	55412673	intron (NM_011392, intron 12 of 12)	intron (NM_011392, intron 12 of 12)	2787	NM_029303	75477	Mm.432537	NM_029303	ENSMUSG00000044444	Pfn3	1700012P12Rik	profilin 3	protein-coding
chr11	118390484	118391282	Intergenic	Intergenic	11076	NM_011150	19039	Mm.3152	NM_011150	ENSMUSG00000033880	Lgals3bp	90K|CyCAP|MAC-2BP|Ppicap|Tango10b	lectin, galactoside-binding, soluble, 3 binding protein	protein-coding
chr11	71592805	71593209	Intergenic	L1M5|LINE|L1	76471	NR_152165	619299	Mm.387056	NR_152165		9230020A06Rik	-	RIKEN cDNA 9230020A06 gene	ncRNA
chr6	74085786	74086229	Intergenic	(TCTCC)n|Simple_repeat|Simple_repeat	-477334	NR_157242	102634075	Mm.78553	NR_157242	ENSMUSG00000107441	Gm31747	-	predicted gene, 31747	ncRNA
chr1	25467265	25467482	intron (NM_175642, intron 10 of 30)	(TCTTG)n|Simple_repeat|Simple_repeat	-189419	NM_001204913	100504323	Mm.484176	NM_001204913		Gm20172	-	predicted gene, 20172	protein-coding
chr1	187667744	187668236	intron (NM_001357535, intron 1 of 7)	MIR|SINE|MIR	15749	NM_001357535	26381	Mm.89989	NM_011935	ENSMUSG00000026610	Esrrg	ERR3|Errg|NR3B3|mKIAA0832	estrogen-related receptor gamma	protein-coding
chr3	84155320	84156016	5' UTR (NM_029797, exon 1 of 8)	5' UTR (NM_029797, exon 1 of 8)	118	NM_029797	76915	Mm.274829	NM_029797	ENSMUSG00000033752	Mnd1	2610034E18Rik|AI591601|Gaj	meiotic nuclear divisions 1	protein-coding
chr10	71293359	71293982	Intergenic	B4|SINE|B4	-8408	NM_145420	216080	Mm.270530	NM_145420	ENSMUSG00000019927	Ube2d1	UBCH5	ubiquitin-conjugating enzyme E2D 1	protein-coding
chr6	134915608	134916329	Intergenic	Intergenic	-4433	NM_009875	12576	Mm.2958	NM_009875	ENSMUSG00000003031	Cdkn1b	AA408329|AI843786|Kip1|p27|p27Kip1	cyclin-dependent kinase inhibitor 1B	protein-coding
chr14	5357933	5358690	Intergenic	Lx8|LINE|L1	30763	NM_001256886	100041678	Mm.443041	NM_001256886	ENSMUSG00000096003	Gm3500	100041758|Gm3401	predicted gene 3500	protein-coding
chr8	10224445	10224968	intron (NM_001319151, intron 1 of 34)	intron (NM_001319151, intron 1 of 34)	70795	NM_001319151	244281	Mm.422761	NM_001081397	ENSMUSG00000039057	Myo16	BM140241|C230040D10Rik|Gm1105|NYAP3|mKIAA0865	myosin XVI	protein-coding
chr7	80108309	80109250	intron (NM_173011, intron 1 of 10)	L1MB2|LINE|L1	6571	NM_173011	269951	Mm.246432	NM_173011	ENSMUSG00000030541	Idh2	E430004F23|IDPm|Idh-2	isocitrate dehydrogenase 2 (NADP+), mitochondrial	protein-coding
chr12	27150688	27151591	intron (NR_045868, intron 2 of 3)	intron (NR_045868, intron 2 of 3)	9377	NR_045868	636791	Mm.423496	NM_001039248	ENSMUSG00000094002	Gm9866	EG636791	predicted gene 9866	ncRNA
chr16	95778691	95779032	Intergenic	Intergenic	76454	NM_011809	23872	Mm.290207	NM_011809	ENSMUSG00000022895	Ets2	AU022856|Ets-2	E26 avian leukemia oncogene 2, 3' domain	protein-coding
chr1	93447241	93448356	intron (NM_133808, intron 1 of 27)	intron (NM_133808, intron 1 of 27)	-2097	NM_001301364	110611	Mm.30012	NM_133808	ENSMUSG00000034088	Hdlbp	1110005P14Rik|AA960365|AI118566|D1Ertd101e	high density lipoprotein (HDL) binding protein	protein-coding
chr15	94716779	94717027	intron (NM_178789, intron 3 of 7)	intron (NM_178789, intron 3 of 7)	87718	NM_178789	320709	Mm.74873	NM_178789	ENSMUSG00000063296	Tmem117	B930062P21Rik	transmembrane protein 117	protein-coding
chr14	122054483	122055228	Intergenic	Intergenic	20181	NM_001037744	223262	Mm.297637	NM_001037744	ENSMUSG00000071229	Timm8a2	-	translocase of inner mitochondrial membrane 8A2	protein-coding
chr8	14536420	14537045	intron (NM_001145965, intron 3 of 14)	intron (NM_001145965, intron 3 of 14)	-351804	NM_012000	26889	Mm.254027	NM_012000	ENSMUSG00000026317	Cln8	mnd	ceroid-lipofuscinosis, neuronal 8	protein-coding
chr8	105657660	105658515	intron (NM_181322, intron 2 of 11)	intron (NM_181322, intron 2 of 11)	5665	NR_163601	102635661		NR_163601		LOC102635661	-	myosin light polypeptide 6-like	pseudo
chr6	71629161	71629816	intron (NM_001362200, intron 2 of 25)	(CAAAAA)n|Simple_repeat|Simple_repeat	3198	NM_173001	104263	Mm.260479	NM_173001	ENSMUSG00000053470	Kdm3a	1700105C21Rik|C230043E16Rik|JHDM2a|Jmjd1|Jmjd1a|KDM2A|TGSA|Tsga	lysine (K)-specific demethylase 3A	protein-coding
chr1	153036841	153037794	intron (NM_175460, intron 1 of 10)	intron (NM_175460, intron 1 of 10)	82216	NM_175460	226518	Mm.40548	NM_175460	ENSMUSG00000042751	Nmnat2	AI843915|D030041I09Rik|PNAT1|PNAT2	nicotinamide nucleotide adenylyltransferase 2	protein-coding
chr2	94794034	94794841	Intergenic	Intergenic	-356251	NM_001349003	11800	Mm.181824	NM_007466	ENSMUSG00000027193	Api5	AAC-11|AI196452|API-5	apoptosis inhibitor 5	protein-coding
chr13	56830140	56830908	intron (NM_001302373, intron 4 of 12)	intron (NM_001302373, intron 4 of 12)	65265	NM_001302373	26946	Mm.62409	NM_012035	ENSMUSG00000021541	Trpc7	TRP7|Trrp8	transient receptor potential cation channel, subfamily C, member 7	protein-coding
chr5	140321410	140322116	promoter-TSS (NM_010752)	promoter-TSS (NM_010752)	141	NM_001356585	17766	Mm.118846	NM_008637	ENSMUSG00000036639	Nudt1	Mth1	nudix (nucleoside diphosphate linked moiety X)-type motif 1	protein-coding
chr4	125509753	125510678	intron (NM_001081097, intron 1 of 15)	RLTR20C1_MM|LTR|ERVK	5466	NR_109835	735288		NR_109835	ENSMUSG00000094403	Mir692-2	Mir692-2a|Mir692-3|Mirn692-2|Mirn692-2a|mir-692-2|mmu-mir-692-2	microRNA 692-2	ncRNA
chr4	14965857	14966329	intron (NM_178617, intron 9 of 12)	intron (NM_178617, intron 9 of 12)	35452	NM_001243100	100038514	Mm.331495	NM_001243100		Gm11837	-	predicted gene 11837	protein-coding
chr10	121795999	121796528	intron (NM_001081037, intron 18 of 21)	intron (NM_001081037, intron 18 of 21)	56333	NM_001359720	270802	Mm.209172	NM_173022	ENSMUSG00000053684	BC048403	E030027L10	cDNA sequence BC048403	protein-coding
chr2	22587512	22588287	Intergenic	Intergenic	-34428	NM_008078	14417	Mm.4784	NM_008078	ENSMUSG00000026787	Gad2	6330404F12Rik|GAD(65)|GAD65|Gad-2	glutamic acid decarboxylase 2	protein-coding
chr17	48104327	48104856	Intergenic	MTEa|LTR|ERVL-MaLR	-14213	NR_110485	320638	Mm.404482	NR_110485	ENSMUSG00000117334	A730006G06Rik	-	RIKEN cDNA A730006G06 gene	ncRNA
chr2	80461824	80462655	Intergenic	RMER5|LTR|ERV1	-14843	NM_011356	20378	Mm.427436	NM_011356	ENSMUSG00000027004	Frzb	Frp|Sfrp3|frezzled|fritz|frzb-1	frizzled-related protein	protein-coding
chr10	24738072	24738798	Intergenic	Intergenic	-26276	NM_008813	18605	Mm.27254	NM_008813	ENSMUSG00000037370	Enpp1	4833416E15Rik|AI428932|C76301|CD203c|E-NPP 1|E-NPP1|Ly-41|M6S1|NPP1|Npps|PC-1|Pca|Pca-1|Pdnp1|ttw|twy	ectonucleotide pyrophosphatase/phosphodiesterase 1	protein-coding
chr8	117906976	117908030	Intergenic	ORR1G|LTR|ERVL-MaLR	-105529	NM_026758	68533	Mm.181836	NM_026758	ENSMUSG00000031843	Mphosph6	1110001M01Rik|AA536809|C86426	M phase phosphoprotein 6	protein-coding
chr3	32390869	32391170	Intergenic	MTEb|LTR|ERVL-MaLR	-25354	NM_009517	22401	Mm.35705	NM_009517	ENSMUSG00000027663	Zmat3	Wig1	zinc finger matrin type 3	protein-coding
chr1	192237479	192238108	intron (NM_001038607, intron 3 of 10)	intron (NM_001038607, intron 3 of 10)	47016	NM_010600	16510	Mm.4489	NM_010600	ENSMUSG00000058248	Kcnh1	EAG1|Kv10.1|M-eag	potassium voltage-gated channel, subfamily H (eag-related), member 1	protein-coding
chr13	57134760	57135435	Intergenic	ID_B1|SINE|B4	-239308	NM_001302372	26946	Mm.62409	NM_012035	ENSMUSG00000021541	Trpc7	TRP7|Trrp8	transient receptor potential cation channel, subfamily C, member 7	protein-coding
chr11	35535410	35536259	intron (NM_011412, intron 5 of 35)	intron (NM_011412, intron 5 of 35)	-80982	NR_029799	723924		NR_029799	ENSMUSG00000065583	Mir218-2	Mirn218-2|mir-218-2	microRNA 218-2	ncRNA
chr19	57493526	57494411	Intergenic	Intergenic	-14596	NR_040306	78073	Mm.12411	NR_040306	ENSMUSG00000117655	6720468P15Rik	-	RIKEN cDNA 6720468P15 gene	ncRNA
chr4	102658538	102659104	Intergenic	Intergenic	68978	NM_001177981	18578	Mm.20181	NM_019840	ENSMUSG00000028525	Pde4b	Dpde4|R74983|dunce	phosphodiesterase 4B, cAMP specific	protein-coding
chr13	71894934	71895564	Intergenic	Intergenic	68474	NM_010573	16371	Mm.316056	NM_010573	ENSMUSG00000060969	Irx1	-	Iroquois homeobox 1	protein-coding
chr17	79549996	79550617	Intergenic	Intergenic	-39820	NR_033462	100038718	Mm.414347	NR_033462		Gm10494	-	predicted gene 10494	ncRNA
chr10	119810322	119810907	intron (NM_133442, intron 1 of 21)	intron (NM_133442, intron 1 of 21)	-8775	NM_130891	74053	Mm.196692	NM_028736	ENSMUSG00000034813	Grip1	4931400F03Rik|GRIP|eb	glutamate receptor interacting protein 1	protein-coding
chr13	109918756	109919350	intron (NM_011056, intron 8 of 16)	intron (NM_011056, intron 8 of 16)	15244	NR_035442	100316683		NR_035442	ENSMUSG00000084651	Mir1904	Mirn1904|mmu-mir-1904	microRNA 1904	ncRNA
chr7	98099312	98099855	intron (NM_001256082, intron 3 of 48)	intron (NM_001256082, intron 3 of 48)	9665	NM_001256083	17921	Mm.1403	NM_008663	ENSMUSG00000030761	Myo7a	Hdb|Myo7|USH1B|nmf371|polka|sh-1|sh1	myosin VIIA	protein-coding
chr3	129280347	129280897	intron (NM_007934, intron 16 of 19)	intron (NM_007934, intron 16 of 19)	52127	NM_007934	13809	Mm.1193	NM_007934	ENSMUSG00000028024	Enpep	6030431M22Rik|APA|Bp-1/6C3|Ly-51|Ly51	glutamyl aminopeptidase	protein-coding
chr3	41293694	41293894	Intergenic	(GAGAA)n|Simple_repeat|Simple_repeat	199405	NR_040385	78706	Mm.366094	NR_040385	ENSMUSG00000097639	Platr4	C430002E04Rik	pluripotency associated transcript 4	ncRNA
chr11	75221142	75221443	intron (NM_177708, intron 1 of 1)	(CAGA)n|Simple_repeat|Simple_repeat	27299	NM_177708	237847	Mm.82661	NM_177708	ENSMUSG00000045287	Rtn4rl1	Ngr3|Ngrh2|Ngrl2	reticulon 4 receptor-like 1	protein-coding
chr12	17532551	17533254	Intergenic	Intergenic	-11971	NM_013614	18263	Mm.34102	NM_013614	ENSMUSG00000011179	Odc1	ODC	ornithine decarboxylase, structural 1	protein-coding
chr12	105374664	105375039	intron (NR_045047, intron 2 of 2)	intron (NR_045047, intron 2 of 2)	28909	NR_045085	100040339	Mm.240751	NR_045085	ENSMUSG00000113314	Gm2721	-	predicted gene 2721	ncRNA
chr17	13173777	13174107	Intergenic	Intergenic	-31100	NR_033458	100038394	Mm.401677	NR_033458	ENSMUSG00000117051	Gm10512	-	predicted gene 10512	ncRNA
chr14	14058379	14058965	intron (NM_139227, intron 4 of 11)	intron (NM_139227, intron 4 of 11)	46181	NM_139227	246103	Mm.133625	NM_139227	ENSMUSG00000021738	Atxn7	A430107N12Rik|AI627028|Sca7|ataxin-7	ataxin 7	protein-coding
chr1	137058445	137059208	Intergenic	Intergenic	-98378	NM_030676	26424	Mm.16794	NM_030676	ENSMUSG00000026398	Nr5a2	AU020803|D1Ertd308e|Ftf|LRH-1|UF2-H3B	nuclear receptor subfamily 5, group A, member 2	protein-coding
chr16	22431861	22432550	intron (NM_001358428, intron 5 of 12)	intron (NM_001358428, intron 5 of 12)	6163	NM_001358428	104156	Mm.155708	NM_023794	ENSMUSG00000013089	Etv5	1110005E01Rik|8430401F14Rik|ERM	ets variant 5	protein-coding
chr6	34615087	34615529	intron (NM_001347100, intron 1 of 13)	intron (NM_001347100, intron 1 of 13)	16804	NM_001347100	109624	Mm.308134	NM_145575	ENSMUSG00000029761	Cald1	4833423D12Rik|AI195384|AV071549|AW536160|C920027I18Rik	caldesmon 1	protein-coding
chr17	73029532	73030208	Intergenic	MTEb|LTR|ERVL-MaLR	-78115	NM_001081071	225010	Mm.329194	NM_001081071	ENSMUSG00000054469	Lclat1	AI181996|Agpat8|Alcat1|Gm91|Lycat	lysocardiolipin acyltransferase 1	protein-coding
chr8	86867141	86868232	intron (NM_030563, intron 1 of 6)	intron (NM_030563, intron 1 of 6)	17572	NM_030563	80750	Mm.25117	NM_030563	ENSMUSG00000031652	N4bp1	AI481586|C81621	NEDD4 binding protein 1	protein-coding
chr19	36932090	36932907	intron (NM_001080706, intron 1 of 37)	intron (NM_001080706, intron 1 of 37)	6419	NM_001080706	107182	Mm.295062	NM_001080706	ENSMUSG00000040565	Btaf1	AI414500|AI447930|E430027O22Rik|TAF170	B-TFIID TATA-box binding protein associated factor 1	protein-coding
chr2	22588700	22590173	Intergenic	Intergenic	-32891	NM_008078	14417	Mm.4784	NM_008078	ENSMUSG00000026787	Gad2	6330404F12Rik|GAD(65)|GAD65|Gad-2	glutamic acid decarboxylase 2	protein-coding
chr8	114664160	114665044	intron (NM_019573, intron 5 of 8)	intron (NM_019573, intron 5 of 8)	224950	NM_019573	80707	Mm.440420	NM_019573	ENSMUSG00000004637	Wwox	5330426P09Rik|9030416C10Rik|WOX1	WW domain-containing oxidoreductase	protein-coding
chr2	63926428	63926775	Intergenic	Intergenic	171437	NM_021716	60344	Mm.130769	NM_021716	ENSMUSG00000075324	Fign	Fgn|fi|fidget	fidgetin	protein-coding
chr5	116641435	116642038	Intergenic	Intergenic	-49919	NM_026886	68955	Mm.146779	NM_026886	ENSMUSG00000063919	Srrm4	1500001A10Rik|B230202K19Rik|bv|mKIAA1853|nSR100	serine/arginine repetitive matrix 4	protein-coding
chr13	85893095	85893524	Intergenic	RLTR9A3|LTR|ERVK	153486	NM_007749	12867	Mm.378898	NM_007749	ENSMUSG00000017778	Cox7c	COXVIIc|Cox7c1	cytochrome c oxidase subunit 7C	protein-coding
chr3	84634965	84635706	Intergenic	Intergenic	-30857	NM_177260	320782	Mm.107370	NM_177260	ENSMUSG00000056498	Tmem154	9930117H01Rik	transmembrane protein 154	protein-coding
chr5	3732793	3733451	intron (NM_001003909, intron 6 of 19)	(CACG)n|Simple_repeat|Simple_repeat	39665	NM_001289529	70797	Mm.130148	NM_001003909	ENSMUSG00000040351	Ankib1	2310061P20Rik|4631416I11Rik|AW494740|C80642|mKIAA1386	ankyrin repeat and IBR domain containing 1	protein-coding
chr14	60518810	60519583	Intergenic	Intergenic	-115509	NM_001033272	219140	Mm.149776	NM_001033272	ENSMUSG00000021990	Spata13	C79050|ESTM11|X83327|mFLJ00298	spermatogenesis associated 13	protein-coding
chr17	31898788	31899388	Intergenic	Intergenic	-43284	NM_010831	17691	Mm.290941	NM_010831	ENSMUSG00000024042	Sik1	Hrt-20|Msk|Sik|Sik-1|Snf1lk	salt inducible kinase 1	protein-coding
chr12	112164269	112165339	intron (NM_001097621, intron 4 of 15)	intron (NM_001097621, intron 4 of 15)	18596	NM_001097621	668303	Mm.313104	NM_001097621	ENSMUSG00000021294	Kif26a	mKIAA1236	kinesin family member 26A	protein-coding
chr6	145746114	145746835	promoter-TSS (NM_027760)	promoter-TSS (NM_027760)	-313	NM_027760	71323	Mm.158669	NM_027760	ENSMUSG00000030259	Rassf8	5133400D11Rik|AA815821|AW123240|Hoj1|mHoj-1	Ras association (RalGDS/AF-6) domain family (N-terminal) member 8	protein-coding
chr12	10363812	10363997	Intergenic	(GAGAA)n|Simple_repeat|Simple_repeat	-6067	NM_027588	70881	Mm.272843	NM_027588	ENSMUSG00000020622	Nt5c1b	4921514H13Rik|AIRP|CN-IB|cN1B	5'-nucleotidase, cytosolic IB	protein-coding
chr13	103775666	103776581	Intergenic	(TGGA)n|Simple_repeat|Simple_repeat	-1515	NM_001361085	218543	Mm.458176	NM_172592	ENSMUSG00000032621	Srek1	8430401B01|AI450757|AI462342|SRrp508|SRrp86|Sfrs12|Srsf12	splicing regulatory glutamine/lysine-rich protein 1	protein-coding
chr15	84599492	84600170	Intergenic	Intergenic	-42008	NM_177630	223732	Mm.6471	NM_177630	ENSMUSG00000055745	Rtl6	BC058638|Ldoc1l|Mar6|Mart6	retrotransposon Gag like 6	protein-coding
chr5	107195970	107196668	intron (NM_011578, intron 3 of 16)	intron (NM_011578, intron 3 of 16)	93310	NM_011578	21814	Mm.200775	NM_011578	ENSMUSG00000029287	Tgfbr3	1110036H20Rik|AU015626|AW215636|TBRIII	transforming growth factor, beta receptor III	protein-coding
chr2	71970824	71971239	Intergenic	Intergenic	-10184	NM_001204167	56508	Mm.196153	NM_019688	ENSMUSG00000049044	Rapgef4	1300003D15Rik|5730402K07Rik|6330581N18Rik|EPAC 2|Epac-2|Epac2|mKIAA4040	Rap guanine nucleotide exchange factor (GEF) 4	protein-coding
chr8	90939696	90940439	intron (NM_177224, intron 3 of 39)	intron (NM_177224, intron 3 of 39)	7818	NM_001310530	109151	Mm.100615	NM_177224	ENSMUSG00000056608	Chd9	1810014J18Rik|9030205D12Rik|A330063D19Rik|AD013|PRIC320|mKIAA0308	chromodomain helicase DNA binding protein 9	protein-coding
chr1	39577321	39578078	promoter-TSS (NM_001033135)	promoter-TSS (NM_001033135)	-352	NM_001033135	67702	Mm.28614	NM_001033135	ENSMUSG00000048234	Rnf149	1600023E10Rik|AV037261|C76763|Gm15832|Greul4	ring finger protein 149	protein-coding
chr13	48309855	48310474	Intergenic	L1MD3|LINE|L1	-36280	NR_045162	320315	Mm.185120	NR_045162	ENSMUSG00000097326	A330048O09Rik	-	RIKEN cDNA A330048O09 gene	ncRNA
chr17	5486375	5487145	Intergenic	Intergenic	-3691	NR_073378	666919		NR_073378		Gm8363	EG666919	non-SMC condensin II complex, subunit H2 pseudogene	pseudo
chr10	61290588	61291232	Intergenic	Intergenic	-6926	NM_011073	18646	Mm.240313	NM_011073	ENSMUSG00000037202	Prf1	Pfn|Pfp|Prf-1	perforin 1 (pore forming protein)	protein-coding
chr2	169578492	169579220	Intergenic	Intergenic	-53653	NM_080455	228911	Mm.315789	NM_080455	ENSMUSG00000047907	Tshz2	2900073F20Rik|B830045G17|Mtsh2|Sdccag33l|Tsh2|Zfp218|mKIAA4248|teashirt2	teashirt zinc finger family member 2	protein-coding
chr11	60744479	60745048	intron (NM_009410, intron 16 of 18)	intron (NM_009410, intron 16 of 18)	16100	NR_039559	100628625		NR_039559	ENSMUSG00000092734	Mir5100	mir-5100|mmu-mir-5100|mu-mir-5100	microRNA 5100	ncRNA
chr8	83837856	83838503	Intergenic	Intergenic	-61919	NM_181039	330814	Mm.260733	NM_181039	ENSMUSG00000013033	Adgrl1	2900070I05Rik|AI182398|CLIBA|Lec2|Lphn1|mKIAA0821	adhesion G protein-coupled receptor L1	protein-coding
chr11	105755970	105756359	intron (NM_181071, intron 4 of 25)	L1_Mus3|LINE|L1	166178	NM_181071	77097	Mm.22501	NM_175492	ENSMUSG00000053580	Tanc2	3526402J09Rik|5730590C14Rik	tetratricopeptide repeat, ankyrin repeat and coiled-coil containing 2	protein-coding
chr9	43361995	43362495	Intergenic	Intergenic	51482	NM_023655	72169	Mm.273277	NM_023655	ENSMUSG00000032013	Trim29	1110047J21Rik|2810431N19Rik|4732461M22Rik|AI119726	tripartite motif-containing 29	protein-coding
chr12	4104895	4105322	intron (NM_153082, intron 6 of 6)	intron (NM_153082, intron 6 of 6)	22534	NM_153082	217378	Mm.271656	NM_153082	ENSMUSG00000020657	Dnajc27	AI639580|C330021A05Rik|Rabj|Rbj	DnaJ heat shock protein family (Hsp40) member C27	protein-coding
chr17	32695314	32695993	intron (NM_134127, intron 6 of 12)	MTEa|LTR|ERVL-MaLR	9994	NM_134127	106648	Mm.26539	NM_134127	ENSMUSG00000073424	Cyp4f15	AI787289|Cyp4f-15	cytochrome P450, family 4, subfamily f, polypeptide 15	protein-coding
chr12	69590330	69590895	intron (NM_001135559, intron 20 of 22)	intron (NM_001135559, intron 20 of 22)	-7584	NM_001033236	207965	Mm.102487	NM_001033236	ENSMUSG00000049882	Vcpkmt	Gm71|Mettl21d|Mettl221d|VCP-KMT	valosin containing protein lysine (K) methyltransferase	protein-coding
chr17	71776635	71777297	intron (NM_001271484, intron 1 of 14)	intron (NM_001271484, intron 1 of 14)	-4333	NM_001271483	78785	Mm.196382	NM_030179	ENSMUSG00000024059	Clip4	1700024K14Rik|1700074B05Rik|4833417L20Rik|5830409B12Rik|Rsnl2	CAP-GLY domain containing linker protein family, member 4	protein-coding
chr13	52692053	52692726	Intergenic	B4A|SINE|B4	64816	NR_027893	105404	Mm.184173	NR_027893		BB123696	-	expressed sequence BB123696	ncRNA
chr4	132953468	132953861	Intergenic	B3A|SINE|B2	-20431	NM_010208	14191	Mm.271665	NM_010208	ENSMUSG00000028874	Fgr	Ali18|Mhdaali18	FGR proto-oncogene, Src family tyrosine kinase	protein-coding
chr8	116253649	116254363	Intergenic	Intergenic	-251009	NM_029297	75465	Mm.23114	NM_029297	ENSMUSG00000034467	Dynlrb2	1700009A04Rik|DNLC2B|Dncl2b	dynein light chain roadblock-type 2	protein-coding
chr6	87216303	87217319	intron (NM_054041, intron 13 of 17)	intron (NM_054041, intron 13 of 17)	112065	NM_001167938	52372	Mm.282851	NM_001167937	ENSMUSG00000090891	D6Ertd527e	AU043841	DNA segment, Chr 6, ERATO Doi 527, expressed	protein-coding
chr7	24891604	24892343	Intergenic	B3|SINE|B2	-5524	NM_007655	12518	Mm.1355	NM_007655	ENSMUSG00000003379	Cd79a	Ig-alpha|Iga|Igalpha|Ly-54|Ly54|mb-1	CD79A antigen (immunoglobulin-associated alpha)	protein-coding
chrX	169238415	169238811	intron (NM_178754, intron 3 of 12)	MER20|DNA|hAT-Charlie	-51404	NM_009666	11704	Mm.391342	NM_009666	ENSMUSG00000031354	Amelx	ALGN|AMGL|AMGX|Amel|Amg|LRAP|Rgsc888	amelogenin, X-linked	protein-coding
chr10	116858427	116859192	intron (NM_001033333, intron 2 of 24)	L1MD3|LINE|L1	38070	NM_001033333	237558	Mm.336386	NM_001033333	ENSMUSG00000034057	Myrfl	Gm239	myelin regulatory factor-like	protein-coding
chr13	56935007	56935612	Intergenic	Intergenic	-39520	NM_001302372	26946	Mm.62409	NM_012035	ENSMUSG00000021541	Trpc7	TRP7|Trrp8	transient receptor potential cation channel, subfamily C, member 7	protein-coding
chr17	81079572	81080456	Intergenic	RLTR9A3B|LTR|ERVK	-14929	NM_028138	72167	Mm.273257	NM_028138	ENSMUSG00000024246	Thumpd2	2810025A12Rik	THUMP domain containing 2	protein-coding
chr14	120521721	120522297	Intergenic	Intergenic	43548	NM_029519	76108	Mm.261448	NM_029519	ENSMUSG00000051615	Rap2a	5830461H18Rik	RAS related protein 2a	protein-coding
chr10	13764213	13764566	intron (NM_025446, intron 3 of 5)	intron (NM_025446, intron 3 of 5)	104568	NM_025446	66253	Mm.45755	NM_025446	ENSMUSG00000019806	Aig1	1500031O19Rik|AV064870|AW413422|CGI-103	androgen-induced 1	protein-coding
chr13	59054449	59054836	intron (NM_001025074, intron 15 of 17)	intron (NM_001025074, intron 15 of 17)	246945	NM_001025074	18212	Mm.130054	NM_008745	ENSMUSG00000055254	Ntrk2	GP145-TrkB/GP95-TrkB|Tkrb|trk-B|trkB	neurotrophic tyrosine kinase, receptor, type 2	protein-coding
chr11	114243568	114244163	Intergenic	Intergenic	45607	NR_045930	73536	Mm.54275	NR_045930	ENSMUSG00000078600	1700092K14Rik	-	RIKEN cDNA 1700092K14 gene	ncRNA
chr16	96608033	96608911	intron (NM_031174, intron 31 of 32)	intron (NM_031174, intron 31 of 32)	140866	NM_008791	18546	Mm.5023	NM_008791	ENSMUSG00000090223	Pcp4	P16Rimb19|Pcp-4|Pep19	Purkinje cell protein 4	protein-coding
chr8	124202156	124202879	Intergenic	ID_B1|SINE|B4	-28877	NM_139272	108148	Mm.33808	NM_139272	ENSMUSG00000089704	Galnt2	AI480629	polypeptide N-acetylgalactosaminyltransferase 2	protein-coding
chr3	87192204	87192836	Intergenic	Intergenic	-17773	NM_001170985	170643	Mm.89552	NM_130867	ENSMUSG00000041734	Kirrel	6720469N11Rik|Kirrel1|Neph1	kirre like nephrin family adhesion molecule 1	protein-coding
chr1	178187377	178187810	5' UTR (NM_024282, exon 1 of 5)	5' UTR (NM_024282, exon 1 of 5)	176	NM_024282	78825	Mm.440132	NM_024282	ENSMUSG00000026502	Desi2	5830417C01Rik|DeSI-2|Fam152a|Pppde1	desumoylating isopeptidase 2	protein-coding
chr12	10817272	10817467	Intergenic	(GAGAA)n|Simple_repeat|Simple_repeat	-230444	NR_045860	71457	Mm.95280	NR_045860	ENSMUSG00000113620	7420701I03Rik	-	RIKEN cDNA 7420701I03 gene	ncRNA
chr11	29367203	29367448	Intergenic	(TTCTC)n|Simple_repeat|Simple_repeat	-6333	NM_176841	108686	Mm.338284	NM_176841	ENSMUSG00000032740	Ccdc88a	A430106J12Rik|AI848406|Ape|C130096N06Rik|C330012F17Rik|D130005J21Rik|Girdin|Giv|Grdn|Hkrp1	coiled coil domain containing 88A	protein-coding
chr5	101013846	101014484	Intergenic	Intergenic	167936	NM_172715	231510	Mm.271911	NM_172715	ENSMUSG00000029314	Gpat3	1-AGPAT|1-AGPAT 9|4933407I02Rik|4933408F15|A230097K15Rik|Agpat9|GPAT-3|mGPAT3	glycerol-3-phosphate acyltransferase 3	protein-coding
chrX	86968459	86968660	intron (NM_001160403, intron 6 of 10)	(GAGAA)n|Simple_repeat|Simple_repeat	-613565	NR_036689	245502	Mm.490821	NR_036689		Gm41	-	melanoma antigen, family B, 4 pseudogene	pseudo
chr17	84957037	84958044	promoter-TSS (NR_027929)	promoter-TSS (NR_027929)	-117	NR_027929	68531	Mm.249695	NR_027929	ENSMUSG00000097047	1110020A21Rik	2600015P10Rik	RIKEN cDNA 1110020A21 gene	ncRNA
chr10	125131390	125131944	Intergenic	Intergenic	177149	NM_001358915	20503	Mm.29161	NM_011391	ENSMUSG00000020102	Slc16a7	4921534N07Rik|9030411M13Rik|D630004K10Rik|Mct2	solute carrier family 16 (monocarboxylic acid transporters), member 7	protein-coding
chr8	118027431	118028558	Intergenic	RLTR20C2_MM|LTR|ERVK	-226020	NM_026758	68533	Mm.181836	NM_026758	ENSMUSG00000031843	Mphosph6	1110001M01Rik|AA536809|C86426	M phase phosphoprotein 6	protein-coding
chr3	107686311	107687088	intron (NM_001357111, intron 1 of 16)	intron (NM_001357111, intron 1 of 16)	9357	NM_001357112	229709	Mm.220328	NM_145542	ENSMUSG00000027893	Ahcyl1	1110034F20Rik|AA409031|AA414901|Ahcy-rs3|DCAL|Irbit	S-adenosylhomocysteine hydrolase-like 1	protein-coding
chr4	137777644	137778191	intron (NM_007431, intron 1 of 11)	intron (NM_007431, intron 1 of 11)	-11442	NM_001287172	11647	Mm.288186	NM_007431	ENSMUSG00000028766	Alpl	ALP|APTNAP|Akp-2|Akp2|TNAP|TNSALP	alkaline phosphatase, liver/bone/kidney	protein-coding
chr12	30155097	30155450	Intergenic	Intergenic	-22649	NM_009417	22018	Mm.4991	NM_009417	ENSMUSG00000020673	Tpo	-	thyroid peroxidase	protein-coding
chr17	88930504	88930680	Intergenic	(TTCTC)n|Simple_repeat|Simple_repeat	-138578	NM_013582	16867	Mm.1644	NM_013582	ENSMUSG00000024107	Lhcgr	Gpcr19-rs1|LH-R|LH/CG-R|LSH-R|Lhr	luteinizing hormone/choriogonadotropin receptor	protein-coding
chr9	111152699	111153077	intron (NM_027742, intron 3 of 13)	L1MB8|LINE|L1	34777	NM_027742	71268	Mm.302287	NM_027742	ENSMUSG00000032497	Lrrfip2	5133400F20Rik|AI850587	leucine rich repeat (in FLII) interacting protein 2	protein-coding
chr11	109336224	109336902	Intergenic	Intergenic	-10304	NR_027883	67927	Mm.394490	NR_027883	ENSMUSG00000099630	1700096J18Rik	-	RIKEN cDNA 1700096J18 gene	ncRNA
chr9	114854686	114855686	Intergenic	ID_B1|SINE|B4	-11034	NM_027294	70031	Mm.150064	NM_027294	ENSMUSG00000041012	Cmtm8	2700018N07Rik|AA408515|Cklfsf8	CKLF-like MARVEL transmembrane domain containing 8	protein-coding
chr3	101595111	101595672	intron (NM_144900, intron 1 of 22)	intron (NM_144900, intron 1 of 22)	9316	NM_144900	11928	Mm.193670	NM_144900	ENSMUSG00000033161	Atp1a1	Atpa-1|BC010319	ATPase, Na+/K+ transporting, alpha 1 polypeptide	protein-coding
chr9	120874039	120874544	Intergenic	Lx9|LINE|L1	40959	NR_040742	76402	Mm.436588	NR_040742	ENSMUSG00000100146	1700020M21Rik	-	RIKEN cDNA 1700020M21 gene	ncRNA
chr4	132928559	132929150	Intergenic	B1_Mur1|SINE|Alu	-6303	NM_001163792	230789	Mm.11473	NM_145553	ENSMUSG00000028878	Fam76a	-	family with sequence similarity 76, member A	protein-coding
chr1	132470929	132471593	Intergenic	Intergenic	-6106	NM_001357486	213464	Mm.132868	NM_172517	ENSMUSG00000026439	Rbbp5	4933411J24Rik|C330016J05	retinoblastoma binding protein 5, histone lysine methyltransferase complex subunit	protein-coding
chr9	21525565	21526495	promoter-TSS (NM_001198794)	promoter-TSS (NM_001198794)	-147	NM_001198794	382062	Mm.325205	NM_206536	ENSMUSG00000057191	AB124611	Gm1706	cDNA sequence AB124611	protein-coding
chr12	70637528	70638012	intron (NR_037248, intron 4 of 4)	intron (NR_037248, intron 4 of 4)	184616	NM_028339	72736	Mm.204670	NM_028339	ENSMUSG00000021072	Tmx1	2810425A04Rik|Txndc1	thioredoxin-related transmembrane protein 1	protein-coding
chr11	55446640	55447462	intron (NM_009720, intron 3 of 3)	ID_B1|SINE|B4	14157	NM_009720	11927	Mm.217759	NM_009720	ENSMUSG00000018585	Atox1	AI256639|Atx1	antioxidant 1 copper chaperone	protein-coding
chr8	57416560	57417124	Intergenic	Intergenic	-39081	NM_009136	20284	Mm.12886	NM_009136	ENSMUSG00000031610	Scrg1	AW124307	scrapie responsive gene 1	protein-coding
chr17	13552147	13553114	intron (NR_045436, intron 1 of 4)	(CTGTG)n|Simple_repeat|Simple_repeat	1464	NR_045436	72578	Mm.46549	NR_045436	ENSMUSG00000117042	2700054A10Rik	-	RIKEN cDNA 2700054A10 gene	ncRNA
chr7	122240244	122241027	Intergenic	Intergenic	21139	NM_027363	70261	Mm.96997	NM_027363	ENSMUSG00000030865	Chp2	2010110P09Rik|Cbhp2	calcineurin-like EF hand protein 2	protein-coding
chr1	157731183	157731755	Intergenic	Intergenic	205299	NM_001159986	89867	Mm.87114	NM_033354	ENSMUSG00000026589	Sec16b	Lztr2|Rgpr|Rgpr-p117	SEC16 homolog B (S. cerevisiae)	protein-coding
chr3	52839729	52840336	Intergenic	Intergenic	87634	NR_040555	622124	Mm.389434	NR_040555	ENSMUSG00000104401	Gm20750	-	predicted gene, 20750	ncRNA
chr12	117443374	117444066	Intergenic	Intergenic	-72759	NM_175930	217944	Mm.227642	NM_175930	ENSMUSG00000041992	Rapgef5	4932413M22|C86120|D030051B22Rik|GFR|Mrgef|mKIAA0277|mmr-gef	Rap guanine nucleotide exchange factor (GEF) 5	protein-coding
chr16	93476261	93476925	Intergenic	RMER6C|LTR|ERVK	-17721	NR_040494	72264	Mm.396204	NR_040494	ENSMUSG00000099968	1700029J03Rik	-	RIKEN cDNA 1700029J03 gene	ncRNA
chr2	76436234	76436922	intron (NM_145525, intron 1 of 26)	intron (NM_145525, intron 1 of 26)	30070	NM_001290734	99031	Mm.240435	NM_145525	ENSMUSG00000042359	Osbpl6	1110062M20Rik|AI596402|ORP-6|mKIAA4128	oxysterol binding protein-like 6	protein-coding
chr4	154661092	154661750	Intergenic	Intergenic	6446	NM_028513	73353	Mm.30958	NM_028513	ENSMUSG00000051276	Actrt2	1700052K15Rik|Arp-T2|Arpm2	actin-related protein T2	protein-coding
chr3	156884837	156885596	intron (NM_001039094, intron 2 of 6)	Lx5b|LINE|L1	323422	NM_177274	320840	Mm.317293	NM_177274	ENSMUSG00000040037	Negr1	5330422G01Rik|KILON|Ntra	neuronal growth regulator 1	protein-coding
chr15	5149137	5150186	intron (NM_001013367, intron 1 of 8)	intron (NM_001013367, intron 1 of 8)	5800	NM_001355640	105787	Mm.207004	NM_001013367	ENSMUSG00000050697	Prkaa1	AI194361|AI450832|AL024255|AMPKalpha1|C130083N04Rik	protein kinase, AMP-activated, alpha 1 catalytic subunit	protein-coding
chr19	29152377	29153156	Intergenic	Intergenic	17487	NR_029778	724062		NR_029778	ENSMUSG00000065556	Mir101b	Mirn101b|mir-101b	microRNA 101b	ncRNA
chr13	57619772	57620436	intron (NM_001166466, intron 4 of 11)	intron (NM_001166466, intron 4 of 11)	288228	NM_001166463	20745	Mm.379020	NM_009262	ENSMUSG00000056222	Spock1	Spock|Ticn1|testican	sparc/osteonectin, cwcv and kazal-like domains proteoglycan 1	protein-coding
chr13	109359596	109360354	intron (NM_011056, intron 3 of 16)	intron (NM_011056, intron 3 of 16)	35231	NR_030644	100124489		NR_030644	ENSMUSG00000076946	Mir582	Mirn582|mir-582|mmu-mir-582	microRNA 582	ncRNA
chr10	43549210	43549913	Intergenic	Intergenic	-8543	NM_026411	67851	Mm.209953	NM_026411	ENSMUSG00000019797	1700021F05Rik	-	RIKEN cDNA 1700021F05 gene	protein-coding
chr5	99617449	99617772	intron (NR_030692, intron 1 of 3)	intron (NR_030692, intron 1 of 3)	111450	NR_030692	319818	Mm.295233	NR_030692	ENSMUSG00000089809	A930011G23Rik	-	RIKEN cDNA A930011G23 gene	ncRNA
chr4	120680869	120681067	Intergenic	(GAGAA)n|Simple_repeat|Simple_repeat	14405	NM_019563	56222	Mm.272646	NM_019563	ENSMUSG00000070803	Cited4	MRG-2|Mrg2	Cbp/p300-interacting transactivator, with Glu/Asp-rich carboxy-terminal domain, 4	protein-coding
chr6	94311182	94312022	Intergenic	Intergenic	-27685	NM_010367	14924	Mm.217216	NM_010367	ENSMUSG00000045095	Magi1	AIP3|BAP1|Baiap1|Gukmi1|MAGI1c|Magi-1|TNRC19|WWP3|mKIAA4129	membrane associated guanylate kinase, WW and PDZ domain containing 1	protein-coding
chr13	9763198	9763894	intron (NM_001347474, intron 1 of 14)	intron (NM_001347474, intron 1 of 14)	264	NM_001347471	66505	Mm.397307	NM_144516	ENSMUSG00000021156	Zmynd11	2210402G22Rik|BS69	zinc finger, MYND domain containing 11	protein-coding
chr12	17543588	17544887	promoter-TSS (NM_013614)	promoter-TSS (NM_013614)	-636	NM_013614	18263	Mm.34102	NM_013614	ENSMUSG00000011179	Odc1	ODC	ornithine decarboxylase, structural 1	protein-coding
chr14	6490265	6490971	Intergenic	Intergenic	-203368	NM_001270812	100861615	Mm.488431	NM_001270812	ENSMUSG00000079396	LOC100861615	-	alpha takusan-like	protein-coding
chr4	49695277	49696085	intron (NM_001033351, intron 6 of 8)	intron (NM_001033351, intron 6 of 8)	-13698	NM_001004025	19059	Mm.46125	NM_001004025	ENSMUSG00000028310	Ppp3r2	CaNB2|CnB2	protein phosphatase 3, regulatory subunit B, alpha isoform (calcineurin B, type II)	protein-coding
chr14	120307109	120307796	intron (NM_001360376, intron 1 of 8)	intron (NM_001360376, intron 1 of 8)	1000	NM_001360376	105559	Mm.238266	NM_175341	ENSMUSG00000022139	Mbnl2	1110002M11Rik|AI047808|AI837313|AI849185|AL118326|MBLL|R75232|mKIAA4072	muscleblind like splicing factor 2	protein-coding
chr5	103102919	103103388	intron (NM_001081567, intron 2 of 13)	intron (NM_001081567, intron 2 of 13)	-44761	NM_001318131	26414	Mm.39253	NM_009158	ENSMUSG00000046709	Mapk10	C230008H04Rik|JNK3|JNK3B1|JNK3B2|SAPK(beta)|Serk2|p493F12|p54bSAPK	mitogen-activated protein kinase 10	protein-coding
chr4	40214254	40214767	intron (NM_172689, intron 12 of 17)	intron (NM_172689, intron 12 of 17)	25315	NM_172689	230073	Mm.86382	NM_172689	ENSMUSG00000040296	Ddx58	6430573D20Rik|C330021E21|RIG-I|RLR-1	DEAD (Asp-Glu-Ala-Asp) box polypeptide 58	protein-coding
chr13	46160325	46160759	Intergenic	Intergenic	-113179	NM_001005422	380842	Mm.188108	NM_001005422	ENSMUSG00000063529	Stmnd1	Gm1574	stathmin domain containing 1	protein-coding
chr18	66425806	66426227	Intergenic	Intergenic	-32588	NM_021451	58801	Mm.271878	NM_021451	ENSMUSG00000024521	Pmaip1	Noxa	phorbol-12-myristate-13-acetate-induced protein 1	protein-coding
chr8	117268153	117268670	intron (NM_001163262, intron 1 of 20)	intron (NM_001163262, intron 1 of 20)	11392	NM_001163262	74440	Mm.233181	NM_028941	ENSMUSG00000034390	Cmip	4933407C03Rik|5830471E12Rik|AI314065|AI464126	c-Maf inducing protein	protein-coding
chr16	31185345	31185849	intron (NM_030138, intron 1 of 22)	intron (NM_030138, intron 1 of 22)	15641	NM_030138	78618	Mm.274646	NM_030138	ENSMUSG00000049076	Acap2	4832442G16|9530039J15Rik|CNT-B2|Centb2|mKIAA0041	ArfGAP with coiled-coil, ankyrin repeat and PH domains 2	protein-coding
chr12	80801148	80801630	intron (NM_178682, intron 1 of 5)	B1_Mur2|SINE|Alu	10857	NM_001242419	217684	Mm.341776	NM_178682	ENSMUSG00000021133	Susd6	4933426M11Rik|mKIAA0247	sushi domain containing 6	protein-coding
chr18	63018387	63019362	intron (NM_001039485, intron 50 of 53)	intron (NM_001039485, intron 50 of 53)	40958	NM_028017	108123	Mm.292687	NM_028017	ENSMUSG00000024581	Napg	2400003O04Rik|SNARE	N-ethylmaleimide sensitive fusion protein attachment protein gamma	protein-coding
chr12	70153530	70154325	promoter-TSS (NM_001195033)	promoter-TSS (NM_001195033)	-204	NM_001195033	100504285	Mm.291105	NM_001195033	ENSMUSG00000090121	Abhd12b	Gm804	abhydrolase domain containing 12B	protein-coding
chr4	16125434	16126302	intron (NR_138102, intron 10 of 11)	intron (NR_138102, intron 10 of 11)	37775	NM_138952	192656	Mm.112765	NM_138952	ENSMUSG00000041135	Ripk2	2210420D18Rik|CARD3|CARDIAK|CCK|D4Bwg0615e|RICK|RIP2	receptor (TNFRSF)-interacting serine-threonine kinase 2	protein-coding
chr11	121406605	121407082	Intergenic	L1MB3|LINE|L1	-14530	NM_181420	238024	Mm.117394	NM_181420	ENSMUSG00000039253	Fn3krp	FN3K-RP	fructosamine 3 kinase related protein	protein-coding
chr12	108542615	108543508	intron (NR_045751, intron 1 of 4)	intron (NR_045751, intron 1 of 4)	-11659	NM_001163394	14026	Mm.238841	NM_007965	ENSMUSG00000021262	Evl	AI528774|b2b2600Clo	Ena-vasodilator stimulated phosphoprotein	protein-coding
chr11	103903322	103903973	intron (NM_008740, intron 8 of 20)	intron (NM_008740, intron 8 of 20)	50409	NM_008740	18195	Mm.260117	NM_008740	ENSMUSG00000034187	Nsf	AI316878|AU020090|AU067812|SKD2	N-ethylmaleimide sensitive fusion protein	protein-coding
chr4	25686892	25687768	intron (NM_010243, intron 2 of 2)	intron (NM_010243, intron 2 of 2)	112673	NM_010243	14348	Mm.39101	NM_010243	ENSMUSG00000055373	Fut9	AI746471|AU067636|mFUT9|mFuc-TIX	fucosyltransferase 9	protein-coding
chr6	91993348	91993768	intron (NM_172731, intron 2 of 20)	intron (NM_172731, intron 2 of 20)	14593	NM_172731	232237	Mm.295740	NM_172731	ENSMUSG00000034037	Fgd5	C330025N11Rik|ZFYVE23|mFLJ00274	FYVE, RhoGEF and PH domain containing 5	protein-coding
chr13	31661716	31662050	Intergenic	Intergenic	36067	NM_010225	14238	Mm.125548	NM_010225	ENSMUSG00000038402	Foxf2	FREAC2|Fkh20|LUN	forkhead box F2	protein-coding
chr13	46871387	46872415	intron (NM_010617, intron 2 of 37)	B1_Mur4|SINE|Alu	57817	NM_010617	16553	Mm.342703	NM_010617	ENSMUSG00000021375	Kif13a	4930505I07Rik|mKIAA4109	kinesin family member 13A	protein-coding
chr15	40351457	40352160	Intergenic	Intergenic	175469	NR_046185	432945	Mm.321981	NR_046185	ENSMUSG00000056332	Gm16294	EG432945	predicted gene 16294	ncRNA
chr6	145931346	145932327	promoter-TSS (NM_001310837)	promoter-TSS (NM_001310837)	-37	NM_001310837	16651	Mm.49689	NM_010656	ENSMUSG00000030255	Sspn	Krag	sarcospan	protein-coding
chr19	58854641	58855546	intron (NM_001327998, intron 2 of 12)	ORR1G|LTR|ERVL-MaLR	5891	NM_175199	73442	Mm.39739	NM_175199	ENSMUSG00000025092	Hspa12a	1700063D12Rik|AI118035|AI840429|AW048913|AW556406|D5Mgi40|Gm19925|mKIAA0417	heat shock protein 12A	protein-coding
chr18	42669347	42669934	intron (NR_073583, intron 6 of 8)	intron (NR_073583, intron 6 of 8)	-89988	NM_181543	240239	Mm.186779	NM_181543	ENSMUSG00000042816	Gpr151	C130082O03Rik|GalRL|PGR7|nGPCR-2037	G protein-coupled receptor 151	protein-coding
chr5	117407715	117408466	Intergenic	Lx8|LINE|L1	-5912	NM_001312914	333050	Mm.437947	NM_001034873	ENSMUSG00000061578	Ksr2	-	kinase suppressor of ras 2	protein-coding
chr4	43741595	43742199	Intergenic	Intergenic	-9962	NR_040667	319973	Mm.233955	NR_040667		A630077J23Rik	-	RIKEN cDNA A630077J23 gene	ncRNA
chr6	49367432	49367998	promoter-TSS (NM_001172216)	promoter-TSS (NM_001172216)	-24	NM_172727	231946	Mm.35199	NM_172727	ENSMUSG00000047115	Fam221a	D330028D13Rik	family with sequence similarity 221, member A	protein-coding
chr19	40436943	40437895	intron (NM_001034962, intron 1 of 22)	(CAA)n|Simple_repeat|Simple_repeat	13979	NM_001034962	20411	Mm.210815	NM_009166	ENSMUSG00000025006	Sorbs1	2310065E01Rik|9530001P15Rik|CAP|SH3P12|Sh3d5|mKIAA1296	sorbin and SH3 domain containing 1	protein-coding
chr9	49672756	49673346	intron (NM_001081445, intron 1 of 17)	intron (NM_001081445, intron 1 of 17)	126018	NM_001081445	17967	Mm.4974	NM_010875	ENSMUSG00000039542	Ncam1	CD56|E-NCAM|NCAM-1|Ncam	neural cell adhesion molecule 1	protein-coding
chr7	16418527	16419350	intron (NM_198631, intron 3 of 13)	intron (NM_198631, intron 3 of 13)	17742	NM_198631	330474	Mm.333594	NM_198631	ENSMUSG00000059273	Zc3h4	Bwq1|Gm768|Kiaa1064-hp	zinc finger CCCH-type containing 4	protein-coding
chr8	91133920	91134324	promoter-TSS (NM_001302267)	promoter-TSS (NM_001302267)	-95	NM_001302268	14339	Mm.324588	NM_010241	ENSMUSG00000031667	Aktip	AL023020|Fif|Ft|Ft1|Fts	thymoma viral proto-oncogene 1 interacting protein	protein-coding
chr7	126453553	126454220	intron (NM_007504, intron 9 of 22)	B1_Mus1|SINE|Alu	9187	NM_007504	11937	Mm.35134	NM_007504	ENSMUSG00000030730	Atp2a1	SERCA1	ATPase, Ca++ transporting, cardiac muscle, fast twitch 1	protein-coding
chr8	13520996	13521512	Intergenic	Intergenic	-26719	NM_019521	14456	Mm.3982	NM_019521	ENSMUSG00000031451	Gas6	Gas-6	growth arrest specific 6	protein-coding
chr5	122662266	122662870	intron (NM_001038839, intron 5 of 12)	Lx8|LINE|L1	12185	NM_001284402	18439	Mm.42026	NM_011027	ENSMUSG00000029468	P2rx7	AI467586|P2X(7)|P2X7R	purinergic receptor P2X, ligand-gated ion channel, 7	protein-coding
chr19	58268438	58269296	intron (NM_010279, intron 7 of 10)	intron (NM_010279, intron 7 of 10)	-27337	NR_040449	791347	Mm.452208	NR_040449		Gm10007	-	predicted gene 10007	ncRNA
chr11	110481516	110481875	intron (NM_001356346, intron 1 of 11)	intron (NM_001356346, intron 1 of 11)	2355	NM_001356346	26399	Mm.14487	NM_011943	ENSMUSG00000020623	Map2k6	MAPKK 6|MAPKK6|MEK6|MKK6|Prkmk6|SAPKK3	mitogen-activated protein kinase kinase 6	protein-coding
chr13	44502697	44503536	Intergenic	Intergenic	63389	NR_045489	69491	Mm.392410	NR_045489	ENSMUSG00000098144	1700029N11Rik	-	RIKEN cDNA 1700029N11 gene	ncRNA
chr9	40596626	40597150	Intergenic	Intergenic	-65505	NM_001357617	235283	Mm.138434	NM_172768	ENSMUSG00000040111	Gramd1b	3222402H23|A930008A22Rik|AI593249|mKIAA1201	GRAM domain containing 1B	protein-coding
chr1	153332887	153333510	promoter-TSS (NM_010683)	promoter-TSS (NM_010683)	-412	NM_010683	226519	Mm.1249	NM_010683	ENSMUSG00000026478	Lamc1	Lamb2	laminin, gamma 1	protein-coding
chr18	64310155	64310745	Intergenic	Intergenic	-29914	NM_194268	225631	Mm.234723	NM_194268	ENSMUSG00000045991	Onecut2	C730009D12|OC-2|Oc2	one cut domain, family member 2	protein-coding
chr12	108070061	108071040	Intergenic	Intergenic	-67136	NM_001079883	58208	Mm.392694	NM_021399	ENSMUSG00000048251	Bcl11b	9130430L19Rik|AI604821|B630002E05Rik|BCL-11B|Ctip2|Rit1	B cell leukemia/lymphoma 11B	protein-coding
chr13	69668049	69668786	Intergenic	Intergenic	56401	NM_145354	28114	Mm.260009	NM_145354	ENSMUSG00000021595	Nsun2	D13Wsu123e|Misu	NOL1/NOP2/Sun domain family member 2	protein-coding
chr10	62955065	62955799	exon (NM_177372, exon 5 of 21)	exon (NM_177372, exon 5 of 21)	8403	NR_152862	327762	Mm.21492	NM_177372	ENSMUSG00000036875	Dna2	Dna2l|E130315B21Rik	DNA replication helicase/nuclease 2	protein-coding
chr5	121058853	121059363	Intergenic	MTD|LTR|ERVL-MaLR	-49016	NM_001302344	19894	Mm.181166	NM_011286	ENSMUSG00000029608	Rph3a	2900002P20Rik|AU022689|AW108370	rabphilin 3A	protein-coding
chr4	154728867	154729324	Intergenic	Intergenic	-61228	NM_028513	73353	Mm.30958	NM_028513	ENSMUSG00000051276	Actrt2	1700052K15Rik|Arp-T2|Arpm2	actin-related protein T2	protein-coding
chr2	116923115	116923958	Intergenic	Intergenic	23384	NR_040335	320975	Mm.132509	NR_040335	ENSMUSG00000085316	D330050G23Rik	-	RIKEN cDNA D330050G23 gene	ncRNA
chr14	120830463	120830851	Intergenic	CpG	-80537	NM_023579	70572	Mm.221452	NM_023579	ENSMUSG00000030662	Ipo5	1110011C18Rik|5730478E03Rik|AA409333|C76941|IMB3|Kpnb3|Ranbp5|imp5	importin 5	protein-coding
chr14	4791860	4792231	Intergenic	ID4_|SINE|ID	-63478	NM_001242945	100041306	Mm.360540	NM_001242945	ENSMUSG00000094132	Gm3264	-	predicted gene 3264	protein-coding
chr18	74432117	74432923	Intergenic	Intergenic	-10099	NM_201600	17919	Mm.260098	NM_008661	ENSMUSG00000025885	Myo5b	AI661750|mKIAA1119	myosin VB	protein-coding
chr8	77442008	77442355	intron (NM_001363418, intron 3 of 21)	intron (NM_001363418, intron 3 of 21)	9908	NR_156496	78514	Mm.165974	NM_030113	ENSMUSG00000037148	Arhgap10	A930033B01Rik|PS-GAP|PSGAP|PSGAP-m|PSGAP-s	Rho GTPase activating protein 10	protein-coding
chr13	73466560	73467779	promoter-TSS (NM_001368682)	promoter-TSS (NM_001368682)	-62	NM_001368682	210992	Mm.284649	NM_145376	ENSMUSG00000021608	Lpcat1	2900035H07Rik|Aytl2|BB137372|BC005662|C87117|LPCAT|LPCAT-1|lysoPAFAT|mLPCAT1|rd11	lysophosphatidylcholine acyltransferase 1	protein-coding
chr15	20436184	20436788	Intergenic	Intergenic	230264	NM_022816	64833	Mm.352763	NM_022816	ENSMUSG00000047565	Acot10	Acate3|MT-ACT48|p48	acyl-CoA thioesterase 10	protein-coding
chr5	51995473	51995904	Intergenic	Intergenic	140329	NR_105845	102466648		NR_105845	ENSMUSG00000098726	Mir6417	Gm27334|mmu-mir-6417	microRNA 6417	ncRNA
chr10	53629617	53630358	promoter-TSS (NM_027830)	promoter-TSS (NM_027830)	-30	NM_027830	71567	Mm.278221	NM_027830	ENSMUSG00000058298	Mcm9	9030408O17Rik|Gm235|Mcmdc1	minichromosome maintenance 9 homologous recombination repair factor	protein-coding
chr9	86667215	86667746	intron (NM_008615, intron 3 of 13)	intron (NM_008615, intron 3 of 13)	19797	NM_001198933	17436	Mm.148155	NM_008615	ENSMUSG00000032418	Me1	D9Ertd267e|Mdh-1|Mod-1|Mod1	malic enzyme 1, NADP(+)-dependent, cytosolic	protein-coding
chr5	118454375	118454923	Intergenic	Intergenic	-106070	NM_172424	76199	Mm.206238	NM_172424	ENSMUSG00000018076	Med13l	2210413I17Rik|6330591G05Rik|9030618F05Rik|Thrap2|Trap240L|mKIAA1025	mediator complex subunit 13-like	protein-coding
chr15	34185253	34185879	Intergenic	Intergenic	-52460	NM_033521	114128	Mm.197518	NM_033521	ENSMUSG00000022257	Laptm4b	C330023P13Rik|LAPTM4beta	lysosomal-associated protein transmembrane 4B	protein-coding
chr16	89749490	89749993	Intergenic	Intergenic	68611	NM_001145887	21844	Mm.310902	NM_009384	ENSMUSG00000002489	Tiam1	AI847750|D16Ium10|D16Ium10e	T cell lymphoma invasion and metastasis 1	protein-coding
chr12	79929112	79930143	intron (NR_131074, intron 2 of 3)	intron (NR_131074, intron 2 of 3)	-4133	NR_131073	77290	Mm.395042	NR_131073	ENSMUSG00000112765	9430078K24Rik	-	RIKEN cDNA 9430078K24 gene	ncRNA
chr1	89315941	89316920	Intergenic	MTEb|LTR|ERVL-MaLR	89703	NR_040482	77331	Mm.374962	NR_040482	ENSMUSG00000099938	C030007H22Rik	-	RIKEN cDNA C030007H22 gene	ncRNA
chr18	78499203	78499461	intron (NM_030683, intron 2 of 11)	G-rich|Low_complexity|Low_complexity	97618	NM_030683	27411	Mm.44158	NM_030683	ENSMUSG00000024552	Slc14a2	UT-A1|UT-A3	solute carrier family 14 (urea transporter), member 2	protein-coding
chr16	91955498	91956307	Intergenic	Intergenic	-24272	NM_138597	28080	Mm.41	NM_138597	ENSMUSG00000022956	Atp5o	ATPO|Atp5po|D12Wsu28e|OSCP	ATP synthase, H+ transporting, mitochondrial F1 complex, O subunit	protein-coding
chr13	99940704	99941200	Intergenic	Intergenic	-40269	NM_013732	27220	Mm.75498	NM_013732	ENSMUSG00000021647	Cartpt	Cart	CART prepropeptide	protein-coding
chr8	119912894	119913923	intron (NM_009462, intron 1 of 13)	intron (NM_009462, intron 1 of 13)	3048	NM_001310630	22224	Mm.256910	NM_009462	ENSMUSG00000031826	Usp10	2610014N07Rik|UBPO|Uchrp|mKIAA0190	ubiquitin specific peptidase 10	protein-coding
chr13	92941640	92942371	Intergenic	L1M4|LINE|L1	97237	NR_160868	382793	Mm.296770	NM_001162945	ENSMUSG00000021704	Mtx3	4930470O13Rik|AA409304|AI853833|AU067765|EG624619|Gm1194|Gm6514	metaxin 3	protein-coding
chr16	40309091	40309729	intron (NM_001361281, intron 1 of 8)	intron (NM_001361281, intron 1 of 8)	325046	NM_001361281	268890	Mm.310524	NM_175548	ENSMUSG00000061080	Lsamp	5430428I19|AW046674|B130007O04Rik|D930023J12Rik|Gm29907|Lam|Lamp	limbic system-associated membrane protein	protein-coding
chr9	119778663	119779443	exon (NM_011887, exon 19 of 27)	exon (NM_011887, exon 19 of 27)	46403	NM_011887	24046	Mm.89981	NM_011887	ENSMUSG00000034115	Scn11a	NSS2|NaN|NaT|NaV1.9|SNS2	sodium channel, voltage-gated, type XI, alpha	protein-coding
chr6	22349600	22350296	intron (NM_138587, intron 1 of 9)	intron (NM_138587, intron 1 of 9)	6133	NM_138587	27999	Mm.490307	NM_138587	ENSMUSG00000029672	Fam3c	D6Wsu176e|Ilei	family with sequence similarity 3, member C	protein-coding
chr9	3004087	3004255	Intergenic	GSAT_MM|Satellite|Satellite	34572	NR_039546	100628572		NR_039546	ENSMUSG00000106183	Mir101c	mir-101c|mmu-mir-101c	microRNA 101c	ncRNA
chr8	84389366	84389949	Intergenic	Intergenic	-25707	NM_001252059	12286	Mm.334658	NM_007578	ENSMUSG00000034656	Cacna1a	APCA|BI|Caca1a|Cacnl1a4|Cav2.1|Ccha1a|EA2|FHM|HPCA|MHP|MHP1|SCA6|alpha1A|la|nmf352|rkr|smrl|tg	calcium channel, voltage-dependent, P/Q type, alpha 1A subunit	protein-coding
chr13	93096577	93097149	non-coding (NR_046182, exon 4 of 4)	non-coding (NR_046182, exon 4 of 4)	2030	NR_046182	408254	Mm.474857	NR_046182	ENSMUSG00000114968	A630019I02Rik	-	RIKEN cDNA A630019I02 gene	ncRNA
chr2	173818979	173819653	Intergenic	Intergenic	81745	NM_019806	56491	Mm.260456	NM_019806	ENSMUSG00000054455	Vapb	AI225786|AI840687|AI848259|D2Abb2e|R75548|VAP33b|Vamp33b	vesicle-associated membrane protein, associated protein B and C	protein-coding
chr13	73449904	73450637	Intergenic	ORR1F|LTR|ERVL-MaLR	-16961	NM_001368682	210992	Mm.284649	NM_145376	ENSMUSG00000021608	Lpcat1	2900035H07Rik|Aytl2|BB137372|BC005662|C87117|LPCAT|LPCAT-1|lysoPAFAT|mLPCAT1|rd11	lysophosphatidylcholine acyltransferase 1	protein-coding
chr17	46376790	46377245	Intergenic	RLTR19D|LTR|ERVK	-6749	NM_021346	57908	Mm.439916	NM_021346	ENSMUSG00000015597	Zfp318	2610034E08Rik|D530032D06Rik|TZF|Znf318	zinc finger protein 318	protein-coding
chr11	68445019	68445903	intron (NM_177320, intron 1 of 18)	intron (NM_177320, intron 1 of 18)	13336	NM_177320	320207	Mm.244960	NM_177320	ENSMUSG00000020901	Pik3r5	AV230647|F730038I15Rik|Foap2|p101	phosphoinositide-3-kinase regulatory subunit 5	protein-coding
chr14	5100299	5100953	Intergenic	Lx8|LINE|L1	49997	NM_175393	108978	Mm.396152	NM_175393	ENSMUSG00000096197	4930555G01Rik	-	RIKEN cDNA 4930555G01 gene	protein-coding
chr10	69595104	69595758	intron (NM_170730, intron 1 of 17)	intron (NM_170730, intron 1 of 17)	61723	NM_170729	11735	Mm.235960	NM_009670	ENSMUSG00000069601	Ank3	2900054D09Rik|AI314020|Ank-3|AnkG|Ankyrin-3|Ankyrin-G	ankyrin 3, epithelial	protein-coding
chr4	139386889	139387694	intron (NM_001160319, intron 1 of 105)	intron (NM_001160319, intron 1 of 105)	6632	NM_001160319	69116	Mm.271956	NM_001160319	ENSMUSG00000066036	Ubr4	1810009A16Rik|A930005E13Rik|D930005K06Rik|Gm1032|Gm1666|N28143|RBAF600|Zubr1|mKIAA0462|p600	ubiquitin protein ligase E3 component n-recognin 4	protein-coding
chr17	29368744	29369372	intron (NM_001159538, intron 8 of 15)	intron (NM_001159538, intron 8 of 15)	8144	NM_001159538	26382	Mm.279187	NM_013710	ENSMUSG00000024013	Fgd2	Tcd-2|Tcd2|ZFYVE4|tcs-2|tcs2	FYVE, RhoGEF and PH domain containing 2	protein-coding
chr18	83496095	83496550	Intergenic	Intergenic	-170438	NR_045361	70960	Mm.410834	NR_045361	ENSMUSG00000118333	4921531P14Rik	1700108N05Rik	RIKEN cDNA 4921531P14 gene	ncRNA
chr15	78610848	78611458	intron (NM_028195, intron 7 of 12)	intron (NM_028195, intron 7 of 12)	14106	NM_028195	72318	Mm.32911	NM_028195	ENSMUSG00000018008	Cyth4	2510004M07Rik|5830469K17Rik|AI467541|Pscd4|mFLJ00017	cytohesin 4	protein-coding
chr12	84450829	84451498	promoter-TSS (NM_134042)	promoter-TSS (NM_134042)	-139	NM_134042	104776	Mm.247510	NM_134042	ENSMUSG00000021238	Aldh6a1	1110038I05Rik|Mmsdh	aldehyde dehydrogenase family 6, subfamily A1	protein-coding
chr13	97392737	97393437	Intergenic	Intergenic	-41883	NR_110432	100039691	Mm.219358	NR_110430	ENSMUSG00000078952	Lncenc1	Gm11019|Gm2373|Lincenc1|Platr18|linc-Enc1	long non-coding RNA, embryonic stem cells expressed 1	ncRNA
chr19	57146853	57147711	intron (NM_001362445, intron 4 of 20)	intron (NM_001362445, intron 4 of 20)	-28258	NM_001103178	226251	Mm.217161	NM_178688	ENSMUSG00000025085	Ablim1	2210411C18Rik|2610209L21Rik|4833406P10Rik|9330196J19Rik|AV079770|AW060987|AW215784|Limab1|mKIAA0059	actin-binding LIM protein 1	protein-coding
chr8	83756770	83757053	Intergenic	(CCCTAA)n|Simple_repeat|Simple_repeat	-15600	NM_001163030	26364	Mm.334648	NM_011925	ENSMUSG00000002885	Adgre5	AA409984|Cd97|TM7LN1	adhesion G protein-coupled receptor E5	protein-coding
chr7	28690878	28691467	Intergenic	Intergenic	-1677	NM_207238	233040	Mm.116116	NM_207238	ENSMUSG00000037463	Fbxo27	E130008B10Rik|FBG5|Gm161	F-box protein 27	protein-coding
chr9	16418704	16419396	intron (NM_001080814, intron 1 of 25)	intron (NM_001080814, intron 1 of 25)	83004	NM_001080814	270120	Mm.195010	NM_001080814	ENSMUSG00000074505	Fat3	9430076A06Rik|D430038H04Rik|Gm1132|Gm510|MFAT3F	FAT atypical cadherin 3	protein-coding
chr2	74902386	74902982	Intergenic	URR1B|DNA|hAT-Charlie	76872	NM_016804	53375	Mm.292613	NM_016804	ENSMUSG00000027099	Mtx2	1500012G02Rik	metaxin 2	protein-coding
chr4	65439083	65439536	intron (NM_207109, intron 19 of 22)	intron (NM_207109, intron 19 of 22)	-165677	NM_001161782	69807	Mm.22786	NM_053084	ENSMUSG00000051675	Trim32	1810045E12Rik|3f3|BBS11|Zfp117	tripartite motif-containing 32	protein-coding
chr6	128097799	128098590	intron (NM_175414, intron 1 of 8)	L1MB3|LINE|L1	45384	NM_175414	109246	Mm.21814	NM_175414	ENSMUSG00000030352	Tspan9	6720474K14Rik|9430079M16Rik|AU018597|Tspan-9	tetraspanin 9	protein-coding
chr7	131156928	131157582	Intergenic	Intergenic	10816	NR_040531	69495	Mm.271181	NR_040531	ENSMUSG00000100759	1700029B22Rik	-	RIKEN cDNA 1700029B22 gene	ncRNA
chr18	65430461	65431014	promoter-TSS (NM_172833)	promoter-TSS (NM_172833)	-253	NM_172833	240354	Mm.132613	NM_172833	ENSMUSG00000032688	Malt1	A630046N12|D430033E09Rik|Pcasp1	MALT1 paracaspase	protein-coding
chr3	143914555	143915249	Intergenic	Intergenic	-202759	NR_040405	621809	Mm.360134	NR_040405	ENSMUSG00000105279	Gm6260	EG621809	predicted gene 6260	ncRNA
chr14	6453616	6454280	Intergenic	Intergenic	-166698	NM_001270812	100861615	Mm.488431	NM_001270812	ENSMUSG00000079396	LOC100861615	-	alpha takusan-like	protein-coding
chr1	180660734	180661423	intron (NM_001103182, intron 5 of 14)	intron (NM_001103182, intron 5 of 14)	19928	NM_001103182	72568	Mm.275044	NM_175186	ENSMUSG00000058729	Lin9	2700022J23Rik|Bara|Lin-9|TGS|TGS1|mLin-9	lin-9 homolog (C. elegans)	protein-coding
chr8	127310716	127311371	intron (NM_001013580, intron 2 of 13)	intron (NM_001013580, intron 2 of 13)	11431	NM_001013580	93742	Mm.299254	NM_033620	ENSMUSG00000025812	Pard3	AA960621|AI256638|Asip|D8Ertd580e|Par-3|Par3|Pard-3|Pard3a|Phip	par-3 family cell polarity regulator	protein-coding
chr7	80049128	80050172	intron (NM_175433, intron 1 of 4)	intron (NM_175433, intron 1 of 4)	23422	NM_175433	209225	Mm.290925	NM_175433	ENSMUSG00000048897	Zfp710	5430400N05Rik|9830165K13|AI324798|Znf710	zinc finger protein 710	protein-coding
chr14	47751748	47752159	Intergenic	Intergenic	88197	NM_001347522	16709	Mm.3110	NM_008477	ENSMUSG00000021843	Ktn1	-	kinectin 1	protein-coding
chr6	118374201	118374820	Intergenic	Intergenic	44907	NM_194339	213895	Mm.25269	NM_194339	ENSMUSG00000030138	Bms1	AA408648|AU020092|AU043373|BB007109|BC030906|Bms1l|mKIAA0187	BMS1, ribosome biogenesis factor	protein-coding
chr16	93445614	93446274	intron (NR_040494, intron 1 of 2)	intron (NR_040494, intron 1 of 2)	12928	NR_040494	72264	Mm.396204	NR_040494	ENSMUSG00000099968	1700029J03Rik	-	RIKEN cDNA 1700029J03 gene	ncRNA
chr13	69237818	69238605	Intergenic	Intergenic	-238670	NM_153534	210044	Mm.390617	NM_153534	ENSMUSG00000021536	Adcy2	mKIAA1060	adenylate cyclase 2	protein-coding
chr10	30701841	30702507	intron (NM_001358842, intron 4 of 14)	intron (NM_001358842, intron 4 of 14)	-46307	NM_001111267	211329	Mm.297903	NM_172495	ENSMUSG00000039697	Ncoa7	9030406N13Rik	nuclear receptor coactivator 7	protein-coding
chr16	90518417	90519081	Intergenic	Intergenic	132352	NM_015755	26559	Mm.125874	NM_015755	ENSMUSG00000053414	Hunk	Bstk1|Mak-v	hormonally upregulated Neu-associated kinase	protein-coding
chr2	174876771	174877350	Intergenic	Charlie8|DNA|hAT-Charlie	116441	NM_007903	13616	Mm.9478	NM_007903	ENSMUSG00000027524	Edn3	ET-3|PPET3|ls|tmgc48	endothelin 3	protein-coding
chr17	86518693	86519530	intron (NM_011104, intron 10 of 14)	intron (NM_011104, intron 10 of 14)	-231933	NR_045435	72104	Mm.443401	NR_045435	ENSMUSG00000100738	2010106C02Rik	-	RIKEN cDNA 2010106C02 gene	ncRNA
chr18	77944473	77945072	intron (NM_001195633, intron 1 of 43)	L1MC4a|LINE|L1	6306	NM_001195633	100502841	Mm.297782	NM_001195633	ENSMUSG00000039840	Epg5	4732475F16|5430411K18Rik|AI661957|AW456499	ectopic P-granules autophagy protein 5 homolog (C. elegans)	protein-coding
chr14	65988140	65989133	intron (NM_178747, intron 10 of 11)	intron (NM_178747, intron 10 of 11)	20153	NM_013492	12759	Mm.200608	NM_013492	ENSMUSG00000022037	Clu	AI893575|ApoJ|Cli|D14Ucla3|SP-40|Sgp-2|Sgp2|Sugp-2	clusterin	protein-coding
chr9	34822998	34823673	intron (NM_001190912, intron 1 of 15)	MTEa|LTR|ERVL-MaLR	-293393	NR_029475	78934	Mm.391688	NR_029475	ENSMUSG00000070315	4930581F22Rik	-	RIKEN cDNA 4930581F22 gene	ncRNA
chr14	46911811	46912523	intron (NM_001037221, intron 2 of 12)	intron (NM_001037221, intron 2 of 12)	29202	NM_001037221	74480	Mm.214454	NM_028966	ENSMUSG00000021838	Samd4	1700024G08Rik|1700111L17Rik|4933436G17Rik|Samd4a|Smaug|Smaug1|sunk	sterile alpha motif domain containing 4	protein-coding
chr13	107664991	107665387	Intergenic	Intergenic	-22208	NR_045900	72257	Mm.234155	NR_045900	ENSMUSG00000102000	1700006H21Rik	-	RIKEN cDNA 1700006H21 gene	ncRNA
chr12	55916773	55917328	Intergenic	(CACCT)n|Simple_repeat|Simple_repeat	80684	NR_155205	52592	Mm.24761	NM_027867	ENSMUSG00000012076	Brms1l	0710008O11Rik|AI159718|BRMS1|D12Ertd407e	breast cancer metastasis-suppressor 1-like	protein-coding
chr14	120261700	120262242	Intergenic	Intergenic	-13698	NM_175341	105559	Mm.238266	NM_175341	ENSMUSG00000022139	Mbnl2	1110002M11Rik|AI047808|AI837313|AI849185|AL118326|MBLL|R75232|mKIAA4072	muscleblind like splicing factor 2	protein-coding
chr6	87745195	87745619	intron (NM_001159697, intron 2 of 7)	intron (NM_001159697, intron 2 of 7)	14538	NM_001159697	58229	Mm.333229	NM_021418	ENSMUSG00000068263	Efcc1	Ccdc48	EF hand and coiled-coil domain containing 1	protein-coding
chr4	41678116	41678639	intron (NM_001136056, intron 2 of 9)	intron (NM_001136056, intron 2 of 9)	17076	NM_001136056	12804	Mm.425178	NM_016673	ENSMUSG00000028444	Cntfr	Cntfralpha	ciliary neurotrophic factor receptor	protein-coding
chr9	111086942	111087672	Intergenic	Intergenic	-29789	NM_001302376	54199	Mm.7336	NM_017466	ENSMUSG00000043953	Ccrl2	1810047I05Rik|Ackr5|CCR11|Cmkbr1l2|E01|L-CCR	chemokine (C-C motif) receptor-like 2	protein-coding
chr16	89695946	89696703	Intergenic	Intergenic	122028	NM_001145887	21844	Mm.310902	NM_009384	ENSMUSG00000002489	Tiam1	AI847750|D16Ium10|D16Ium10e	T cell lymphoma invasion and metastasis 1	protein-coding
chr13	57950360	57951259	Intergenic	Intergenic	-42477	NM_009262	20745	Mm.379020	NM_009262	ENSMUSG00000056222	Spock1	Spock|Ticn1|testican	sparc/osteonectin, cwcv and kazal-like domains proteoglycan 1	protein-coding
chr5	117125624	117126314	intron (NM_001199685, intron 1 of 20)	intron (NM_001199685, intron 1 of 20)	5840	NM_001199685	330177	Mm.24343	NM_183306	ENSMUSG00000061288	Taok3	2900006A08Rik|A130052D22|A430105I05Rik	TAO kinase 3	protein-coding
chr12	117809295	117810379	Intergenic	Intergenic	-34024	NM_146040	217946	Mm.281149	NM_146040	ENSMUSG00000021175	Cdca7l	BC006933|JPO2	cell division cycle associated 7 like	protein-coding
chr9	101097607	101097854	intron (NM_001100451, intron 1 of 1)	intron (NM_001100451, intron 1 of 1)	22968	NM_001100451	77853	Mm.326206	NM_001100451	ENSMUSG00000066415	Msl2	E130103E02Rik|Msl2l1|Rnf184	MSL complex subunit 2	protein-coding
chr13	21893535	21894041	Intergenic	ERVL-E-int|LTR|ERVL	3261	NR_035500	100316716		NR_035500	ENSMUSG00000088148	Mir1983	mmu-mir-1983	microRNA 1983	ncRNA
chr6	54934521	54935350	intron (NM_172729, intron 7 of 11)	intron (NM_172729, intron 7 of 11)	36726	NM_001171007	107607	Mm.28498	NM_172729	ENSMUSG00000038058	Nod1	C230079P11|Card4|F830007N14Rik|Nlrc1	nucleotide-binding oligomerization domain containing 1	protein-coding
chr17	72622856	72623381	Intergenic	Intergenic	-18811	NM_007439	11682	Mm.311854	NM_007439	ENSMUSG00000055471	Alk	CD246|Tcrz	anaplastic lymphoma kinase	protein-coding
chr13	97308484	97308791	Intergenic	Intergenic	67532	NM_007930	13803	Mm.241073	NM_007930	ENSMUSG00000041773	Enc1	Nrpb|PIG10	ectodermal-neural cortex 1	protein-coding
chr8	48685914	48686684	Intergenic	Intergenic	-11609	NM_011857	23965	Mm.42191	NM_011857	ENSMUSG00000031561	Tenm3	2610100B16Rik|Odz1|Odz3|Ten-m3|mKIAA1455	teneurin transmembrane protein 3	protein-coding
chr9	42018761	42019562	intron (NM_001357261, intron 18 of 42)	intron (NM_001357261, intron 18 of 42)	58052	NM_001357261	20660	Mm.121920	NM_011436	ENSMUSG00000049313	Sorl1	2900010L19Rik|AI596264|AW261561|LR11|SorLA|gp250|mSorLA	sortilin-related receptor, LDLR class A repeats-containing	protein-coding
chr9	113935580	113936602	intron (NM_013699, intron 2 of 15)	B1F1|SINE|Alu	5157	NM_013699	22221	Mm.28052	NM_013699	ENSMUSG00000009741	Ubp1	Cp2b|LBP-1a|LBP-1b|NF2d9	upstream binding protein 1	protein-coding
chr11	86516629	86517232	exon (NM_028259, exon 9 of 10)	exon (NM_028259, exon 9 of 10)	27877	NM_001363162	72508	Mm.394280	NM_028259	ENSMUSG00000020516	Rps6kb1	2610318I15Rik|AA959758|AI256796|AI314060|P70S6K1|S6K|S6K-beta-1|S6K1|p70 S6K-alpha|p70 S6KA|p70-S6K 1|p70/85s6k|p70s6k	ribosomal protein S6 kinase, polypeptide 1	protein-coding
chr2	174633094	174633595	Intergenic	MTEa|LTR|ERVL-MaLR	-10190	NM_001099328	100043757	Mm.48711	NM_001099328	ENSMUSG00000050600	Zfp831	-	zinc finger protein 831	protein-coding
chr2	58574537	58575192	intron (NM_001289660, intron 1 of 7)	L1ME4b|LINE|L1	7530	NM_001289660	76654	Mm.200370	NM_029692	ENSMUSG00000026839	Upp2	1700124F02Rik|AI266885|UDRPASE2|UP2|UPASE2	uridine phosphorylase 2	protein-coding
chr17	30099396	30100033	intron (NM_001356265, intron 2 of 5)	intron (NM_001356265, intron 2 of 5)	94675	NR_151443	21769	Mm.220972	NM_148926	ENSMUSG00000044477	Zfand3	AW539211|TEG-27|Tex27	zinc finger, AN1-type domain 3	protein-coding
chr6	121519382	121519863	Intergenic	Intergenic	-45944	NR_110358	243621	Mm.299442	NM_001033354	ENSMUSG00000040797	Iqsec3	AK122446|BRAG3|mKIAA1110|synarfGEF	IQ motif and Sec7 domain 3	protein-coding
chr14	67085757	67086509	Intergenic	MTEb|LTR|ERVL-MaLR	-13662	NM_001205188	71978	Mm.273997	NM_028032	ENSMUSG00000022052	Ppp2r2a	2410004D02Rik|mKIAA1541	protein phosphatase 2, regulatory subunit B, alpha	protein-coding
chr7	29360626	29361339	intron (NM_001081028, intron 13 of 22)	intron (NM_001081028, intron 13 of 22)	52981	NM_001368371	29861	Mm.101885	NM_013874	ENSMUSG00000030584	Dpf1	Neud4	D4, zinc and double PHD fingers family 1	protein-coding
chr8	65558247	65558713	Intergenic	(TCTA)n|Simple_repeat|Simple_repeat	-59560	NM_001363124	72925	Mm.380457	NM_175188	ENSMUSG00000036469	2025-03-01	2900024D24Rik|BB085186	membrane-associated ring finger (C3HC4) 1	protein-coding
chr12	36714183	36714717	Intergenic	Intergenic	-101755	NR_039558	100628578		NR_039558	ENSMUSG00000092998	Mir5099	mmu-mir-5099|mu-mir-5099	microRNA 5099	ncRNA
chr15	30932032	30932442	intron (NM_008729, intron 17 of 22)	intron (NM_008729, intron 17 of 22)	-106889	NR_045186	73784	Mm.66947	NR_045186	ENSMUSG00000115474	4930430F21Rik	-	RIKEN cDNA 4930430F21 gene	ncRNA
chr1	74662453	74663125	intron (NM_001014974, intron 1 of 19)	intron (NM_001014974, intron 1 of 19)	1087	NM_001014974	67534	Mm.260714	NM_001014974	ENSMUSG00000033257	Ttll4	4632407P03Rik|AI451681|mKIAA0173	tubulin tyrosine ligase-like family, member 4	protein-coding
chr2	70985464	70985810	intron (NM_145524, intron 3 of 9)	intron (NM_145524, intron 3 of 9)	69969	NM_001110512	228019	Mm.490343	NM_145524	ENSMUSG00000041975	Mettl8	BC004636|Tip	methyltransferase like 8	protein-coding
chr5	111107301	111107825	intron (NM_001267622, intron 5 of 22)	intron (NM_001267622, intron 5 of 22)	103419	NR_030482	735278		NR_030482	ENSMUSG00000076163	Mir701	Mirn701|mir-701|mmu-mir-701	microRNA 701	ncRNA
chr5	126029156	126029805	Intergenic	Intergenic	-179579	NM_001370875	231736		NM_001370875		Gm4868	EG231736	predicted gene 4868	protein-coding
chr5	110886565	110886974	intron (NM_001267622, intron 1 of 22)	MERVL_2A-int|LTR|ERVL	6966	NM_001267622	209683	Mm.295660	NM_024477	ENSMUSG00000033209	Ttc28	2310015L07Rik|6030435N04|AI428795|AI851761|BC002262|TPRBK	tetratricopeptide repeat domain 28	protein-coding
chr9	65127147	65127586	intron (NM_020043, intron 10 of 19)	ID_B1|SINE|B4	-13788	NM_001357257	19289	Mm.41529	NM_008988	ENSMUSG00000032394	Igdcc3	2810401C09Rik|AI851425|Punc|WI-14920	immunoglobulin superfamily, DCC subclass, member 3	protein-coding
chr6	53373051	53373636	intron (NM_001327821, intron 2 of 10)	PB1D10|SINE|Alu	86040	NM_001327821	231991	Mm.227444	NM_172728	ENSMUSG00000053007	Creb5	9430076C15Rik|CRE-BPa|Crebpa|D430026C09Rik	cAMP responsive element binding protein 5	protein-coding
chr6	77969729	77970219	intron (NM_145732, intron 1 of 18)	intron (NM_145732, intron 1 of 18)	9693	NM_145732	12386	Mm.34637	NM_009819	ENSMUSG00000063063	Ctnna2	AI481747|Catna|Catna2|cdf|chp	catenin (cadherin associated protein), alpha 2	protein-coding
chr14	44715746	44716178	Intergenic	Intergenic	9025	NM_001162954	666744	Mm.387002	NM_001162954	ENSMUSG00000091923	Gm8267	EG666744	predicted gene 8267	protein-coding
chr9	114607244	114607816	intron (NM_153585, intron 13 of 19)	RLTR24|LTR|ERV1	32670	NM_153585	78893	Mm.283708	NM_153585	ENSMUSG00000056167	Cnot10	2600001P13Rik	CCR4-NOT transcription complex, subunit 10	protein-coding
chr2	34654329	34654919	Intergenic	RSINE1|SINE|B4	100608	NR_151469	66691	Mm.156452	NM_025709	ENSMUSG00000026867	Gapvd1	2010005B09Rik|4432404J10Rik|AW108497|Gapex-5|RAP6|RME-6|mKIAA1521	GTPase activating protein and VPS9 domains 1	protein-coding
chr5	102556684	102557483	intron (NM_029270, intron 2 of 9)	intron (NM_029270, intron 2 of 9)	75692	NM_146161	231532	Mm.440191	NM_029270	ENSMUSG00000057315	Arhgap24	0610025G21Rik	Rho GTPase activating protein 24	protein-coding
chr8	123764801	123765345	Intergenic	Intergenic	31115	NR_040702	234863	Mm.246601	NR_040702	ENSMUSG00000110599	6030466F02Rik	-	RIKEN cDNA 6030466F02 gene	ncRNA
chr6	143485661	143486426	Intergenic	RMER1C|Other|Other	49465	NR_155418	75904	Mm.414916	NR_155418	ENSMUSG00000084971	4930579D09Rik	-	RIKEN cDNA 4930579D09 gene	ncRNA
chr12	84618868	84619381	Intergenic	Intergenic	-1658	NM_008992	19300	Mm.229109	NM_008992	ENSMUSG00000021240	Abcd4	P69r|P70R|Pxmp1l	ATP-binding cassette, sub-family D (ALD), member 4	protein-coding
chr6	97547095	97548210	intron (NM_145148, intron 1 of 23)	B4A|SINE|B4	-59832	NM_001346637	232288	Mm.27789	NM_145148	ENSMUSG00000030064	Frmd4b	6030440G05Rik|C87375|GOBLIN|GRSP1|R74720	FERM domain containing 4B	protein-coding
chr13	13860746	13861001	Intergenic	(TTAGGG)n|Simple_repeat|Simple_repeat	76566	NM_010317	14706	Mm.215394	NM_010317	ENSMUSG00000021303	Gng4	-	guanine nucleotide binding protein (G protein), gamma 4	protein-coding
chr17	5998057	5998649	intron (NM_001357667, intron 4 of 24)	intron (NM_001357667, intron 4 of 24)	-9227	NM_001290698	20975	Mm.236068	NM_011523	ENSMUSG00000023805	Synj2	AI481647|SJ2|mKIAA0348	synaptojanin 2	protein-coding
chr8	126059621	126060243	Intergenic	Intergenic	64830	NM_008430	16525	Mm.10800	NM_008430	ENSMUSG00000033998	Kcnk1	AI788889|TWIK-1	potassium channel, subfamily K, member 1	protein-coding
chr2	17560927	17561356	intron (NR_156125, intron 2 of 5)	intron (NR_156125, intron 2 of 5)	-2373	NR_105847	102465964		NR_105847	ENSMUSG00000099161	Mir6419	Gm27713|mmu-mir-6419	microRNA 6419	ncRNA
chr17	62639680	62640295	intron (NM_207654, intron 2 of 4)	intron (NM_207654, intron 2 of 4)	241330	NM_010109	13640	Mm.7978	NM_010109	ENSMUSG00000048915	Efna5	AL-1|AV158822|EFL-5|Ephrin-A5|Epl7|LERK-7|RAGS	ephrin A5	protein-coding
chr5	122649731	122650556	promoter-TSS (NM_001284402)	promoter-TSS (NM_001284402)	-240	NM_001284402	18439	Mm.42026	NM_011027	ENSMUSG00000029468	P2rx7	AI467586|P2X(7)|P2X7R	purinergic receptor P2X, ligand-gated ion channel, 7	protein-coding
chr11	121520055	121520687	intron (NM_029878, intron 13 of 38)	intron (NM_029878, intron 13 of 38)	-1029	NM_178763	319530	Mm.11395	NM_178763	ENSMUSG00000039238	Zfp750	A030007D23Rik|Znf750	zinc finger protein 750	protein-coding
chr4	131712005	131712597	Intergenic	Lx9|LINE|L1	125977	NM_001083119	19273	Mm.4860	NM_011214	ENSMUSG00000028909	Ptpru	Ftp-1|PCP-2|PTP|PTP-lambda|PTPlambda|Pcp2|Ptpf|Ptprl|R-PTP-U|R-PTP-psi|RPTPlambda	protein tyrosine phosphatase, receptor type, U	protein-coding
chr7	50242432	50242864	intron (NM_001037906, intron 9 of 19)	intron (NM_001037906, intron 9 of 19)	267298	NM_001037906	338352	Mm.383528	NM_001037906	ENSMUSG00000055409	Nell1	B230343H07Rik|l7R6	NEL-like 1	protein-coding
chr19	43471567	43472609	intron (NM_031396, intron 5 of 10)	intron (NM_031396, intron 5 of 10)	31652	NM_031396	83674	Mm.329864	NM_031396	ENSMUSG00000025189	Cnnm1	AI846314|Acdp1|CLP-1	cyclin M1	protein-coding
chr10	63009440	63010006	intron (NM_027425, intron 16 of 17)	intron (NM_027425, intron 16 of 17)	10577	NM_001359260	432467	Mm.274784	NM_001079824	ENSMUSG00000020069	Hnrnph3	AA693301|AI666703|Hnrph3	heterogeneous nuclear ribonucleoprotein H3	protein-coding
chr2	173503884	173504453	Intergenic	Intergenic	-18424	NM_028158	72221	Mm.46132	NM_028158	ENSMUSG00000027518	1700021F07Rik	-	RIKEN cDNA 1700021F07 gene	protein-coding
chrX	129569596	129569779	Intergenic	(GAGAA)n|Simple_repeat|Simple_repeat	-180055	NM_172493	54004	Mm.10763	NM_017398	ENSMUSG00000034480	Diaph2	Dia3|Diap2|Drf2|E430022I22Rik	diaphanous related formin 2	protein-coding
chr8	16267583	16267779	intron (NM_053171, intron 12 of 69)	(TTCTC)n|Simple_repeat|Simple_repeat	-98843	NR_037214	100526464		NR_037214	ENSMUSG00000093142	Mir3106	mir-3106|mmu-mir-3106	microRNA 3106	ncRNA
chr1	66075710	66075918	Intergenic	(GAGAA)n|Simple_repeat|Simple_repeat	-99515	NM_001039934	17756	Mm.256966	NM_008632	ENSMUSG00000015222	Map2	G1-397-34|MAP-2|Mtap-2|Mtap2|repro4	microtubule-associated protein 2	protein-coding
chr6	40480413	40480733	intron (NM_001364578, intron 6 of 6)	intron (NM_001364578, intron 6 of 6)	9105	NM_001286663	381760	Mm.276356	NM_028358	ENSMUSG00000029911	Ssbp1	2810480P10Rik|G630031O20Rik|MtSSB|mtDBP	single-stranded DNA binding protein 1	protein-coding
chr10	60661080	60661913	intron (NR_045556, intron 2 of 68)	intron (NR_045556, intron 2 of 68)	34994	NM_001252635	22295	Mm.440327	NM_023370	ENSMUSG00000012819	Cdh23	4930542A03Rik|USH1D|ahl|ahl1|bob|bus|mdfw|nmf112|nmf181|nmf252|sals|v	cadherin 23 (otocadherin)	protein-coding
chr6	35388660	35389497	Intergenic	Intergenic	58232	NR_040526	73409	Mm.69443	NR_040526	ENSMUSG00000107341	1700065J11Rik	-	RIKEN cDNA 1700065J11 gene	ncRNA
chr7	97040866	97041580	intron (NM_153591, intron 11 of 13)	intron (NM_153591, intron 11 of 13)	-40528	NM_010248	14389	Mm.42033	NM_010248	ENSMUSG00000004508	Gab2	AI463667|D130058I17Rik|p97	growth factor receptor bound protein 2-associated protein 2	protein-coding
chr14	121499914	121500596	intron (NM_053079, intron 1 of 22)	intron (NM_053079, intron 1 of 22)	4999	NM_053079	56643	Mm.155618	NM_053079	ENSMUSG00000025557	Slc15a1	D630032F02|PECT1|PEPT1	solute carrier family 15 (oligopeptide transporter), member 1	protein-coding
chr13	57655812	57656510	intron (NM_001166466, intron 4 of 11)	MTD|LTR|ERVL-MaLR	252171	NM_001166463	20745	Mm.379020	NM_009262	ENSMUSG00000056222	Spock1	Spock|Ticn1|testican	sparc/osteonectin, cwcv and kazal-like domains proteoglycan 1	protein-coding
chr6	145337691	145338147	Intergenic	Intergenic	-49706	NR_003625	381827	Mm.179075	NM_001001987		1700073E17Rik	-	ribosomal protein L7 pseudogene	pseudo
chr7	102895719	102895894	Intergenic	(TTCTC)n|Simple_repeat|Simple_repeat	-4536	NM_147110	259114	Mm.377855	NM_147110	ENSMUSG00000073964	Olfr570	MOR8-3	olfactory receptor 570	protein-coding
chr13	22963486	22963704	Intergenic	(TC)n|Simple_repeat|Simple_repeat	-47654	NM_134215	171249	Mm.378580	NM_134215	ENSMUSG00000060024	Vmn1r213	V1rh6	vomeronasal 1 receptor 213	protein-coding
chr14	3124304	3125365	Intergenic	Intergenic	-63450	NM_001270806	544990	Mm.360540	NM_001270806	ENSMUSG00000079409	Gm5795	-	predicted gene 5795	protein-coding
chr5	117659606	117660295	intron (NM_001312914, intron 5 of 19)	MIRb|SINE|MIR	-206889	NM_008712	18125	Mm.44249	NM_008712	ENSMUSG00000029361	Nos1	2310005C01Rik|N-NOS|NC-NOS|NO|NOS|NOS-I|Nos-1|bNOS|nNOS	nitric oxide synthase 1, neuronal	protein-coding
chr10	86298792	86299463	intron (NM_001164495, intron 6 of 6)	intron (NM_001164495, intron 6 of 6)	-1285	NM_011595	21859	Mm.4871	NM_011595	ENSMUSG00000020044	Timp3	Timp-3	tissue inhibitor of metalloproteinase 3	protein-coding
chr17	62867971	62868671	intron (NM_207654, intron 1 of 4)	intron (NM_207654, intron 1 of 4)	12996	NM_010109	13640	Mm.7978	NM_010109	ENSMUSG00000048915	Efna5	AL-1|AV158822|EFL-5|Ephrin-A5|Epl7|LERK-7|RAGS	ephrin A5	protein-coding
chr11	14956925	14957862	Intergenic	Intergenic	358153	NM_001164166	432536	Mm.33646	NM_001164166	ENSMUSG00000084135	Pom121l12	1700054H16Rik	POM121 membrane glycoprotein-like 12	protein-coding
chr4	153023170	153023796	Intergenic	Intergenic	325943	NR_033138	330004	Mm.291863	NM_001033414		Gm833	-	predicted gene 833	ncRNA
chr19	6870816	6871430	Intergenic	ID_B1|SINE|B4	-12912	NM_001081291	78317	Mm.329596	NM_198008	ENSMUSG00000047810	Ccdc88b	2610041P08Rik|Ccdc88	coiled-coil domain containing 88B	protein-coding
chr17	67235715	67236246	intron (NM_008984, intron 1 of 30)	intron (NM_008984, intron 1 of 30)	118479	NM_008984	19274	Mm.311809	NM_008984	ENSMUSG00000033278	Ptprm	RPTPmu|mKIAA4044	protein tyrosine phosphatase, receptor type, M	protein-coding
chr2	162259444	162260274	intron (NM_001291151, intron 4 of 30)	intron (NM_001291151, intron 4 of 30)	-130954	NR_040617	77645	Mm.447752	NR_040617	ENSMUSG00000084919	Ptprtos	C330008G21Rik	protein tyrosine phosphatase, receptor type T, opposite strand	ncRNA
chr4	58087044	58087505	intron (NM_022814, intron 32 of 47)	intron (NM_022814, intron 32 of 47)	-78148	NM_026132	67402	Mm.87357	NM_026132	ENSMUSG00000038709	Txndc8	4930429J24Rik|Sptrx-3|Sptrx3|Trx6	thioredoxin domain containing 8	protein-coding
chr14	12108525	12109079	intron (NM_008981, intron 6 of 29)	intron (NM_008981, intron 6 of 29)	-81141	NM_001347593	19270	Mm.431266	NM_008981	ENSMUSG00000021745	Ptprg	5430405N12Rik|AW046354|AW549872|RPTPgamma	protein tyrosine phosphatase, receptor type, G	protein-coding
chrX	38279825	38280311	Intergenic	Intergenic	-27587	NM_001289727	245386	Mm.72979	NM_172930	ENSMUSG00000036502	Tmem255a	4933417N17|6430550H21Rik|Fam70a	transmembrane protein 255A	protein-coding
chrX	12181626	12182199	Intergenic	Intergenic	-21557	NM_001168321	71458	Mm.196328	NM_029510	ENSMUSG00000040363	Bcor	2900008C10Rik|5830466J11Rik|8430401K06Rik|BcorR|D930024N20Rik|mKIAA1575	BCL6 interacting corepressor	protein-coding
chr11	52527082	52527891	Intergenic	MTEa|LTR|ERVL-MaLR	131058	NM_153117	213673	Mm.291979	NM_153117	ENSMUSG00000036275	9530068E07Rik	C85061|Kct2	RIKEN cDNA 9530068E07 gene	protein-coding
chr1	37212235	37213404	Intergenic	Intergenic	-5459	NM_001282010	12790	Mm.214224	NM_009918	ENSMUSG00000026114	Cnga3	CNG3	cyclic nucleotide gated channel alpha 3	protein-coding
chr7	39939714	39940375	Intergenic	Intergenic	422278	NM_001004139	70227	Mm.333800	NM_001004139	ENSMUSG00000068959	Zfp619	3000002G13Rik	zinc finger protein 619	protein-coding
chr2	149734540	149735274	Intergenic	Intergenic	-95876	NM_001363095	433485	Mm.330649	NM_001085521	ENSMUSG00000074736	Syndig1	AW123113|DSPC2|Gm14134|H2C20orf39|Tmem90b	synapse differentiation inducing 1	protein-coding
chr7	79976029	79976494	Intergenic	Intergenic	-40997	NM_027420	70420	Mm.34266	NM_027420	ENSMUSG00000039043	Arpin	2610034B18Rik	actin-related protein 2/3 complex inhibitor	protein-coding
chr7	75464726	75465460	intron (NM_029332, intron 1 of 36)	intron (NM_029332, intron 1 of 36)	9559	NM_029332	75547	Mm.216107	NM_029332	ENSMUSG00000066406	Akap13	1700026G02Rik|5730522G15Rik|5830460E08Rik|AKAP-13|AKAP-Lbc|BRX|Ht31|LBC|PROTO-LB|PROTO-LBC	A kinase (PRKA) anchor protein 13	protein-coding
chr1	39325527	39326271	intron (NM_008719, intron 9 of 20)	intron (NM_008719, intron 9 of 20)	-41952	NM_001252219	114641	Mm.379302	NM_053257	ENSMUSG00000073702	Rpl31	Dts	ribosomal protein L31	protein-coding
chr14	3994327	3994779	Intergenic	PB1D7|SINE|Alu	-29388	NM_001029930	545007	Mm.449725	NM_001029930	ENSMUSG00000096775	Gm5796	-	predicted gene 5796	protein-coding
chr10	4487350	4488100	intron (NM_001370993, intron 1 of 9)	L1MC4a|LINE|L1	5210	NM_001370992
chr7	83316557	83317533	Intergenic	Intergenic	168575	NM_177895	330578	Mm.5796	NM_177895	ENSMUSG00000053528	A530021J07Rik	-	Riken cDNA A530021J07 gene	protein-coding
chr8	11239963	11240582	intron (NR_133670, intron 13 of 52)	intron (NR_133670, intron 13 of 52)	-72533	NM_009932	12827	Mm.181021	NM_009932	ENSMUSG00000031503	Col4a2	Col4a-2	collagen, type IV, alpha 2	protein-coding
chr1	105765610	105766443	Intergenic	Intergenic	-14697	NM_009399	21934	Mm.6251	NM_009399	ENSMUSG00000026321	Tnfrsf11a	Ly109|ODFR|OFE|Rank|TRANCE-R|mRANK	tumor necrosis factor receptor superfamily, member 11a, NFKB activator	protein-coding
chr5	138975121	138975782	TTS (NM_008808)	TTS (NM_008808)	18830	NR_156469	18590	Mm.2675	NM_008808	ENSMUSG00000025856	Pdgfa	PDGF-1	platelet derived growth factor, alpha	protein-coding
chr8	123800055	123800614	Intergenic	Intergenic	-5662	NM_009003	19341	Mm.9221	NM_009003	ENSMUSG00000019478	Rab4a	AI848268|Rab4	RAB4A, member RAS oncogene family	protein-coding
chr4	125197465	125197990	Intergenic	(CACG)n|Simple_repeat|Simple_repeat	-69846	NM_153159	230738	Mm.402	NM_153159	ENSMUSG00000042677	Zc3h12a	BC036563|MCPIP|MCPIP-1|Mcpip1|Reg1	zinc finger CCCH type containing 12A	protein-coding
chr6	61651036	61651379	intron (NM_183310, intron 7 of 10)	intron (NM_183310, intron 7 of 10)	-470397	NR_040287	100504262	Mm.438066	NR_040287		A730020E08Rik	-	RIKEN cDNA A730020E08 gene	ncRNA
chr12	99444124	99444813	intron (NM_183186, intron 1 of 5)	MTEa|LTR|ERVL-MaLR	5606	NM_183186	71375	Mm.341972	NM_183186	ENSMUSG00000033713	Foxn3	5430426H20Rik|AA589593|AW556347|Ches1|Ches1l|HTLFL1	forkhead box N3	protein-coding
chr8	61869851	61870344	intron (NM_001293772, intron 2 of 21)	L1Md_F2|LINE|L1	32610	NM_001081390	72333	Mm.29933	NM_001081390	ENSMUSG00000058056	Palld	2410003B16Rik|6030492A02	palladin, cytoskeletal associated protein	protein-coding
chr3	32408746	32409450	Intergenic	RMER15|LTR|ERVL	-27053	NM_008839	18706	Mm.260521	NM_008839	ENSMUSG00000027665	Pik3ca	6330412C24Rik|caPI3K|p110|p110alpha	phosphatidylinositol-4,5-bisphosphate 3-kinase catalytic subunit alpha	protein-coding
chr14	122309874	122310490	intron (NM_029556, intron 1 of 7)	intron (NM_029556, intron 1 of 7)	-76544	NR_015532	68245	Mm.443285	NR_015532	ENSMUSG00000100585	1700108J01Rik	-	RIKEN cDNA 1700108J01 gene	ncRNA
chr12	76338875	76339943	Intergenic	Intergenic	14518	NM_001101471	238276	Mm.311452	NM_001101471	ENSMUSG00000021057	Akap5	3526401B18Rik|AKAP 150|AKAP-5|AKAP150|BB098886|Gm258|P150	A kinase (PRKA) anchor protein 5	protein-coding
chr3	51745224	51745661	intron (NM_001004176, intron 2 of 4)	intron (NM_001004176, intron 2 of 4)	84263	NM_001310482	211666	Mm.24679	NM_174995	ENSMUSG00000074604	Mgst2	GST2|MGST-II	microsomal glutathione S-transferase 2	protein-coding
chr13	32775058	32775805	intron (NM_001368880, intron 2 of 14)	intron (NM_001368880, intron 2 of 14)	8533	NM_001368880	238564	Mm.60041	NM_001166030	ENSMUSG00000044951	Mylk4	EG238564	myosin light chain kinase family, member 4	protein-coding
chr12	31249902	31250615	Intergenic	Intergenic	-15035	NM_008482	16777	Mm.172674	NM_008482	ENSMUSG00000002900	Lamb1	C77966|C80098|C81607|D130003D08Rik|Lamb-1|Lamb1-1	laminin B1	protein-coding
chr12	29094291	29095085	Intergenic	RLTR14_RN|LTR|ERV1	-47241	NR_154987	102633526	Mm.134217	NR_154987		Gm31333	-	predicted gene, 31333	ncRNA
chr4	142086745	142087025	non-coding (NR_027137, exon 4 of 5)	non-coding (NR_027137, exon 4 of 5)	-2581	NM_145402	214359	Mm.27587	NM_145402	ENSMUSG00000040616	Tmem51	BC003277	transmembrane protein 51	protein-coding
chr9	104002047	104002719	promoter-TSS (NM_028721)	promoter-TSS (NM_028721)	-161	NM_028721	74025	Mm.479273	NM_028721	ENSMUSG00000032558	Nphp3	3632410F03Rik|AI550417|C230078J01|D330020E01Rik|pcy	nephronophthisis 3 (adolescent)	protein-coding
chr10	44695392	44696023	Intergenic	MIRc|SINE|MIR	-236959	NM_007548	12142	Mm.4800	NM_007548	ENSMUSG00000038151	Prdm1	Blimp-1|Blimp1|PRDI-BF1|ZNFPR1A1|b2b1765Clo	PR domain containing 1, with ZNF domain	protein-coding
chr18	67357697	67358396	intron (NM_007702, intron 1 of 4)	intron (NM_007702, intron 1 of 4)	-13943	NR_033214	338360	Mm.441590	NR_033214	ENSMUSG00000046415	B430212C06Rik	-	RIKEN cDNA B430212C06 gene	ncRNA
chr16	44293869	44294564	intron (NM_198034, intron 3 of 24)	intron (NM_198034, intron 3 of 24)	38622	NM_198034	320007	Mm.242144	NM_198034	ENSMUSG00000022696	Sidt1	AW045928|B830021E24Rik	SID1 transmembrane family, member 1	protein-coding
chr9	25251197	25252618	promoter-TSS (NM_001359736)	promoter-TSS (NM_001359736)	-84	NM_001359737	235072	Mm.270259	NM_009859	ENSMUSG00000001833	2025-09-07	Cdc10|E430034N22	septin 7	protein-coding
chr11	83569940	83570316	Intergenic	L2|LINE|L2	8508	NM_011338	20308	Mm.416125	NM_011338	ENSMUSG00000019122	Ccl9	CCF18|MRP-2|Scya10|Scya9	chemokine (C-C motif) ligand 9	protein-coding
chr14	35034873	35035652	intron (NM_008166, intron 4 of 15)	intron (NM_008166, intron 4 of 15)	140653	NR_029774	723847		NR_029774	ENSMUSG00000065481	Mir346	Mirn346|mir-346|mmu-mir-346	microRNA 346	ncRNA
chr15	84576315	84576966	Intergenic	Intergenic	-18817	NM_177630	223732	Mm.6471	NM_177630	ENSMUSG00000055745	Rtl6	BC058638|Ldoc1l|Mar6|Mart6	retrotransposon Gag like 6	protein-coding
chr5	101111116	101111798	Intergenic	Intergenic	265228	NM_172715	231510	Mm.271911	NM_172715	ENSMUSG00000029314	Gpat3	1-AGPAT|1-AGPAT 9|4933407I02Rik|4933408F15|A230097K15Rik|Agpat9|GPAT-3|mGPAT3	glycerol-3-phosphate acyltransferase 3	protein-coding
chr3	152517288	152518315	TTS (NM_001355635)	TTS (NM_001355635)	121117	NM_001287139	108946	Mm.379292	NM_198416	ENSMUSG00000039068	Zzz3	3110065C23Rik|6430567E01Rik|AA408566|AI481057|AW556059|R75514	zinc finger, ZZ domain containing 3	protein-coding
chr11	55141465	55142217	intron (NM_172258, intron 5 of 10)	MTEb|LTR|ERVL-MaLR	9867	NM_172258	215332	Mm.87054	NM_172258	ENSMUSG00000049491	Slc36a3	PAT3|TRAMD2|tramdorin2	solute carrier family 36 (proton/amino acid symporter), member 3	protein-coding
chr1	31106718	31107276	Intergenic	Intergenic	-10543	NR_136907	102634473	Mm.484482	NR_136907	ENSMUSG00000086727	Gm29669	-	predicted gene 29669	ncRNA
chr8	79127752	79128878	intron (NM_178267, intron 7 of 14)	L1ME4a|LINE|L1	99878	NM_001294279	622675	Mm.48724	NM_178267	ENSMUSG00000071064	Zfp827	2810449M09Rik|D630040G17Rik|Znf827	zinc finger protein 827	protein-coding
chr14	5850470	5850855	Intergenic	ID4_|SINE|ID	-42723	NM_001291094	100041515	Mm.443041	NM_001205306	ENSMUSG00000096629	Gm3383	-	predicted gene 3383	protein-coding
chr19	4045896	4046429	Intergenic	Intergenic	-3941	NM_181796	14869	Mm.441542	NM_181796	ENSMUSG00000038155	Gstp2	GSTpiA|Gst-3|Gst3	glutathione S-transferase, pi 2	protein-coding
chr11	55475940	55476809	intron (NM_013716, intron 1 of 11)	intron (NM_013716, intron 1 of 11)	-6332	NR_028480	100303747	Mm.453534	NR_028480	ENSMUSG00000087342	Gm12238	Mbi-39	predicted gene 12238	snoRNA
chr1	156964520	156965021	Intergenic	Intergenic	-25144	NM_001357391	78255	Mm.28376	NM_023884	ENSMUSG00000026594	Ralgps2	1810020P17Rik|2210408F11Rik|4921528G01Rik|9130014M22Rik|AU043409|AW046161	Ral GEF with PH domain and SH3 binding motif 2	protein-coding
chr4	137250669	137251526	Intergenic	Intergenic	-26538	NM_009523	22417	Mm.20355	NM_009523	ENSMUSG00000036856	Wnt4	Wnt-4	wingless-type MMTV integration site family, member 4	protein-coding
chr15	17174808	17175486	Intergenic	ORR1C2-int|LTR|ERVL-MaLR	446232	NM_009869	12565	Mm.439758	NM_009869	ENSMUSG00000025370	Cdh9	-	cadherin 9	protein-coding
chr11	117221880	117222551	intron (NM_001113486, intron 2 of 11)	intron (NM_001113486, intron 2 of 11)	22554	NM_001113486	53860	Mm.38450	NM_017380	ENSMUSG00000059248	2025-09-09	MSF1|Msf|PNUTL4|Sint1	septin 9	protein-coding
chr13	48798320	48799329	Intergenic	Intergenic	72061	NM_011078	18676	Mm.486213	NM_011078	ENSMUSG00000038025	Phf2	GRC5	PHD finger protein 2	protein-coding
chr5	114683693	114684198	intron (NM_019821, intron 1 of 4)	intron (NM_019821, intron 1 of 4)	6990	NM_019821	56356	Mm.275766	NM_019821	ENSMUSG00000011884	Gltp	1110001F24Rik|C76925|C77564	glycolipid transfer protein	protein-coding
chr11	11497762	11498423	intron (NM_028669, intron 4 of 5)	intron (NM_028669, intron 4 of 5)	8826	NM_028669	73862	Mm.159077	NM_028669	ENSMUSG00000020191	Spata48	4930415F15Rik	spermatogenesis associated 48	protein-coding
chr2	58487079	58487658	intron (NM_001355048, intron 3 of 10)	intron (NM_001355048, intron 3 of 10)	74042	NM_001355048	11477	Mm.689	NM_007394	ENSMUSG00000026836	Acvr1	ALK2|ActR-I|ActRIA|Acvr|Acvr1a|Acvrlk2|Alk-2|Alk8|D330013D15Rik|SKR1|Tsk7L	activin A receptor, type 1	protein-coding
chr10	5316661	5317050	intron (NM_001347711, intron 43 of 145)	RMER4A|LTR|ERVK	-122148	NM_001079686	64009	Mm.331626	NM_022027	ENSMUSG00000096054	Syne1	8B|A330049M09Rik|BE692247|C130039F11Rik|CPG2|KASH1|Myne1|mKIAA1756|myne-1	spectrin repeat containing, nuclear envelope 1	protein-coding
chr5	124439565	124440415	promoter-TSS (NM_001310725)	promoter-TSS (NM_001310725)	60	NM_001310725	67956	Mm.137966	NM_030241	ENSMUSG00000049327	Kmt5a	2410195B05Rik|AA617402|AW536475|PR-SET7|PR/SET07|Setd8	lysine methyltransferase 5A	protein-coding
chr13	38261700	38262198	Intergenic	Intergenic	57010	NM_026382	67797	Mm.250783	NM_026382	ENSMUSG00000021431	Snrnp48	1110050F08Rik|6530403A03Rik|C6orf151	small nuclear ribonucleoprotein 48 (U11/U12)	protein-coding
chr10	93696007	93696554	intron (NM_021320, intron 3 of 9)	URR1B|DNA|hAT-Charlie	-12958	NR_038017	100504069	Mm.391412	NR_038017	ENSMUSG00000085723	Gm15915	-	predicted gene 15915	ncRNA
chr13	57275927	57276698	Intergenic	B3|SINE|B2	-380523	NM_001302372	26946	Mm.62409	NM_012035	ENSMUSG00000021541	Trpc7	TRP7|Trrp8	transient receptor potential cation channel, subfamily C, member 7	protein-coding
chr2	21012836	21013375	Intergenic	Intergenic	44231	NR_033225	433408	Mm.386941	NR_033225		Gm13375	-	predicted gene 13375	ncRNA
chr9	20866871	20867448	Intergenic	L1MA5|LINE|L1	-1483	NM_175687	319278	Mm.249932	NM_175687	ENSMUSG00000038884	Shfl	A230050P20Rik|RyDEN	shiftless antiviral inhibitor of ribosomal frameshifting	protein-coding
chr15	93663870	93664541	Intergenic	MLT1F-int|LTR|ERVL-MaLR	-68303	NM_001033217	106042	Mm.150314	NM_001033217	ENSMUSG00000036158	Prickle1	1110058P22Rik|AW215793|Prickle|b2b019Clo|mpk1	prickle planar cell polarity protein 1	protein-coding
chrX	13013912	13014569	Intergenic	Intergenic	-27775	NR_038158	70489	Mm.383563	NR_038158	ENSMUSG00000087424	5730405O15Rik	-	RIKEN cDNA 5730405O15 gene	ncRNA
chr1	174762982	174763434	intron (NM_019445, intron 15 of 17)	Kanga1c|DNA|TcMar-Tc2	158611	NM_011825	23893	Mm.25760	NM_011825	ENSMUSG00000050069	Grem2	Gremlin2|Prdc	gremlin 2, DAN family BMP antagonist	protein-coding
chr19	24961598	24961908	promoter-TSS (NR_033744)	promoter-TSS (NR_033744)	-137	NR_033744	226043	Mm.272127	NM_146097	ENSMUSG00000024878	Cbwd1	AV349248|BC018472	COBW domain containing 1	protein-coding
chr10	43237660	43238738	intron (NM_001168289, intron 1 of 7)	intron (NM_001168289, intron 1 of 7)	16713	NM_027772	71365	Mm.490430	NM_027772	ENSMUSG00000038240	Pdss2	5430420P03Rik|Gm60|Plmp|kd|mDLP1	prenyl (solanesyl) diphosphate synthase, subunit 2	protein-coding
chr1	168482642	168483049	Intergenic	ERVL-int|LTR|ERVL	-7798	NR_105766	102465178		NR_105766	ENSMUSG00000098407	Mir6348	Gm27412|mmu-mir-6348	microRNA 6348	ncRNA
chr15	86664039	86664589	Intergenic	Intergenic	386639	NM_001358062	223754	Mm.28904	NM_145476	ENSMUSG00000051864	Tbc1d22a	BC023106|D15Ertd781e	TBC1 domain family, member 22a	protein-coding
chr13	70637648	70638882	promoter-TSS (NM_144837)	promoter-TSS (NM_144837)	-631	NM_144837	218333	Mm.139738	NM_144837	ENSMUSG00000034525	Ice1	C77245|mKIAA0947	interactor of little elongation complex ELL subunit 1	protein-coding
chrX	138441475	138442130	intron (NM_030688, intron 5 of 10)	intron (NM_030688, intron 5 of 10)	-232222	NM_026469	67944	Mm.443280	NM_026469	ENSMUSG00000071686	Tex13a	1700025D03Rik	testis expressed 13A	protein-coding
chr6	140715781	140716599	Intergenic	Intergenic	89305	NM_001309436	11569	Mm.86453	NM_009637	ENSMUSG00000030232	Aebp2	AU023766|B230313N05Rik	AE binding protein 2	protein-coding
chr12	71278111	71278794	Intergenic	B1_Mus1|SINE|Alu	-31432	NM_021532	59036	Mm.46662	NM_021532	ENSMUSG00000044548	Dact1	4921528D17Rik|AI115603|DAPPER|DAPPER1|FRODO|Frd1|Frodo1|MDpr1|MTNG3|THYEX3	dishevelled-binding antagonist of beta-catenin 1	protein-coding
chr17	69225668	69226414	intron (NM_001355734, intron 3 of 22)	RLTR16|LTR|ERVK	51165	NR_045428	69750	Mm.439063	NR_045428	ENSMUSG00000100572	2410021H03Rik	-	RIKEN cDNA 2410021H03 gene	ncRNA
chr14	63009234	63009592	Intergenic	Intergenic	-2358	NM_001039121	654458	Mm.390737	NM_001039121	ENSMUSG00000075572	Defb43	BD-43|EG654458|mBD-43	defensin beta 43	protein-coding
chr15	36999333	37000011	3' UTR (NM_026521, exon 4 of 4)	3' UTR (NM_026521, exon 4 of 4)	7730	NM_026521	68036	Mm.371631	NM_026521	ENSMUSG00000062397	Zfp706	3110006P09Rik|AA793007|AW536850|C77232|Znf706	zinc finger protein 706	protein-coding
chr4	45714166	45714814	intron (NM_001033412, intron 1 of 2)	intron (NM_001033412, intron 1 of 2)	30901	NM_001033412	329839	Mm.331582	NM_001033412		Gm829	-	predicted gene 829	protein-coding
chr5	136599710	136600864	Intergenic	ZP3AR|Satellite|Satellite	-32797	NM_001291234	13047	Mm.320317	NM_009986	ENSMUSG00000029705	Cux1	CDP|Cutl1|Cux|Cux-1	cut-like homeobox 1	protein-coding
chr8	11070968	11071774	Intergenic	Intergenic	-62442	NM_001081212	384783	Mm.407207	NM_001081212	ENSMUSG00000038894	Irs2	Irs-2	insulin receptor substrate 2	protein-coding
chr10	118208168	118209069	intron (NM_016971, intron 4 of 4)	intron (NM_016971, intron 4 of 4)	3654	NM_016971	50929	Mm.103585	NM_016971	ENSMUSG00000074695	Il22	IL-22|IL-22a|ILTIFa|Iltif	interleukin 22	protein-coding
chr9	83973228	83973978	intron (NM_199195, intron 3 of 10)	intron (NM_199195, intron 3 of 10)	24822	NM_199195	12040	Mm.12819	NM_199195	ENSMUSG00000032263	Bckdhb	BCKDE1B|BCKDH E1-beta	branched chain ketoacid dehydrogenase E1, beta polypeptide	protein-coding
chr2	35044199	35045118	intron (NM_010406, intron 5 of 40)	B1_Mus1|SINE|Alu	16754	NM_010406	15139	Mm.2168	NM_010406	ENSMUSG00000026874	Hc	C5|C5a|He|Hfib2	hemolytic complement	protein-coding
chr8	117813131	117814056	Intergenic	MTD|LTR|ERVL-MaLR	-11619	NM_026758	68533	Mm.181836	NM_026758	ENSMUSG00000031843	Mphosph6	1110001M01Rik|AA536809|C86426	M phase phosphoprotein 6	protein-coding
chr18	66438449	66439327	Intergenic	RMER15|LTR|ERVL	-19716	NM_021451	58801	Mm.271878	NM_021451	ENSMUSG00000024521	Pmaip1	Noxa	phorbol-12-myristate-13-acetate-induced protein 1	protein-coding
chr3	138860205	138861082	intron (NR_121195, intron 1 of 7)	intron (NR_121195, intron 1 of 7)	118435	NM_019571	56224	Mm.31927	NM_019571	ENSMUSG00000028152	Tspan5	2810455A09Rik|4930505M03Rik|NET-4|Tm4sf9	tetraspanin 5	protein-coding
chr3	151163717	151164747	Intergenic	Intergenic	-140370	NR_039540	100628568		NR_039540	ENSMUSG00000092830	Mir3963	mmu-mir-3963|mu-mir-3963	microRNA 3963	ncRNA
chr5	52744983	52745659	intron (NM_028744, intron 2 of 9)	intron (NM_028744, intron 2 of 9)	3747	NM_028744	67073	Mm.248647	NM_025951	ENSMUSG00000029186	Pi4k2b	2610042N09Rik|4933409G22Rik	phosphatidylinositol 4-kinase type 2 beta	protein-coding
chr2	9979247	9979660	intron (NM_027748, intron 2 of 6)	intron (NM_027748, intron 2 of 6)	69156	NM_027748	209361	Mm.86343	NM_027748	ENSMUSG00000025782	Taf3	140kDa|4933439M23Rik|AW539625|TAF140|TAFII-140|TAFII140|mTAFII140	TATA-box binding protein associated factor 3	protein-coding
chr3	117850919	117851415	intron (NM_029655, intron 1 of 8)	intron (NM_029655, intron 1 of 8)	17769	NM_029655	76561	Mm.33824	NM_029655	ENSMUSG00000028007	Snx7	2510028H01Rik	sorting nexin 7	protein-coding
chr6	45115626	45116112	intron (NM_001004357, intron 1 of 23)	intron (NM_001004357, intron 1 of 23)	55808	NM_001004357	66797	Mm.440084	NM_025771	ENSMUSG00000039419	Cntnap2	5430425M22Rik|Caspr2|mKIAA0868	contactin associated protein-like 2	protein-coding
chr10	78037100	78037528	intron (NR_073358, intron 9 of 14)	intron (NR_073358, intron 9 of 14)	-4973	NM_001081695	54427	Mm.13433	NM_019448	ENSMUSG00000000730	Dnmt3l	D6Ertd14e|ecat7	DNA (cytosine-5-)-methyltransferase 3-like	protein-coding
chr5	112381647	112382451	Intergenic	Intergenic	12724	NM_001357013	72898	Mm.151745	NM_028386	ENSMUSG00000029348	Asphd2	2900006N09Rik|9230106G13Rik	aspartate beta-hydroxylase domain containing 2	protein-coding
chr1	38515144	38516027	intron (NM_001290814, intron 4 of 21)	C-rich|Low_complexity|Low_complexity	111659	NM_001290814	16764	Mm.336679	NM_010678	ENSMUSG00000037138	Aff3	3222402O04Rik|A730046J16|LAF-4|Laf4	AF4/FMR2 family, member 3	protein-coding
chr10	91664552	91665163	Intergenic	L1_Mur1|LINE|L1	-223972	NR_152729	102633867	Mm.351514	NR_152729	ENSMUSG00000111657	Gm31592	-	predicted gene, 31592	ncRNA
chr5	52956949	52957287	Intergenic	Intergenic	35174	NR_040413	75954	Mm.258937	NR_040413	ENSMUSG00000106352	5033403H07Rik	-	RIKEN cDNA 5033403H07 gene	ncRNA
chr11	56072330	56073232	Intergenic	Intergenic	-31794	NM_153079	216749	Mm.213205	NM_153079	ENSMUSG00000037393	Nmur2	Nmu2r	neuromedin U receptor 2	protein-coding
chr19	20793725	20794428	intron (NM_028953, intron 18 of 20)	intron (NM_028953, intron 18 of 20)	-66520	NM_011921	26358	Mm.14609	NM_011921	ENSMUSG00000024747	Aldh1a7	AI987940|Ahd2-like|Aldh-pb|Aldh1a4|Aldhpb	aldehyde dehydrogenase family 1, subfamily A7	protein-coding
chr9	31221030	31221886	Intergenic	RMER15|LTR|ERVL	-9610	NM_009691	11804	Mm.19133	NM_009691	ENSMUSG00000031996	Aplp2	AI790698|APLP-2|CDEBP	amyloid beta (A4) precursor-like protein 2	protein-coding
chr5	111029676	111030352	intron (NM_001267622, intron 2 of 22)	intron (NM_001267622, intron 2 of 22)	25870	NR_030482	735278		NR_030482	ENSMUSG00000076163	Mir701	Mirn701|mir-701|mmu-mir-701	microRNA 701	ncRNA
chr19	56619485	56620311	Intergenic	Intergenic	71637	NM_025811	66866	Mm.46346	NM_025811	ENSMUSG00000025078	Nhlrc2	1200003G01Rik|AI835049|AV002846|AW496455	NHL repeat containing 2	protein-coding
chr14	63014582	63014999	intron (NM_001039121, intron 1 of 1)	intron (NM_001039121, intron 1 of 1)	3019	NM_001039121	654458	Mm.390737	NM_001039121	ENSMUSG00000075572	Defb43	BD-43|EG654458|mBD-43	defensin beta 43	protein-coding
chr18	83520348	83521170	Intergenic	Intergenic	-194875	NR_045361	70960	Mm.410834	NR_045361	ENSMUSG00000118333	4921531P14Rik	1700108N05Rik	RIKEN cDNA 4921531P14 gene	ncRNA
chr14	87264390	87264884	Intergenic	Intergenic	-123413	NM_019670	56419	Mm.440585	NM_019670	ENSMUSG00000022021	Diaph3	4930417P13Rik|Dia2|Diap3|Drf3|p134MDia2	diaphanous related formin 3	protein-coding
chr15	66570109	66570392	Intergenic	Intergenic	-7322	NM_001081409	239510	Mm.267473	NM_178718	ENSMUSG00000072501	Phf20l1	CGI-72|E130113K22Rik	PHD finger protein 20-like 1	protein-coding
chr8	113634710	113635637	promoter-TSS (NM_173015)	promoter-TSS (NM_173015)	-413	NM_001048143	270096	Mm.74689	NM_173015	ENSMUSG00000078908	Mon1b	5031407H10|5033413H12Rik	MON1 homolog B, secretory traffciking associated	protein-coding
chr15	57990519	57991348	intron (NM_173862, intron 1 of 3)	PB1D11|SINE|Alu	5030	NM_173862	239463	Mm.221241	NM_173862	ENSMUSG00000051225	Fam83a	-	family with sequence similarity 83, member A	protein-coding
chr9	54296173	54296512	intron (NM_177350, intron 1 of 9)	Lx8|LINE|L1	5228	NR_045805	73567	Mm.211290	NM_001033169	ENSMUSG00000074343	Gldnos	1700104A03Rik	gliomedin, opposite strand	ncRNA
chr19	25505240	25505948	promoter-TSS (NM_015826)	promoter-TSS (NM_015826)	-112	NM_015826	50796	Mm.391208	NM_015826	ENSMUSG00000024837	Dmrt1	-	doublesex and mab-3 related transcription factor 1	protein-coding
chr19	56460511	56461333	promoter-TSS (NM_172641)	promoter-TSS (NM_172641)	-715	NM_172641	226245	Mm.156742	NM_172641	ENSMUSG00000035818	Plekhs1	9930023K05Rik	pleckstrin homology domain containing, family S member 1	protein-coding
chr14	72749335	72750046	Intergenic	Lx8|LINE|L1	-39687	NM_207636	319448	Mm.205421	NM_207636	ENSMUSG00000033487	Fndc3a	1700094E19Rik|D14Ertd453e|F730017H24Rik|Fndc3|sys	fibronectin type III domain containing 3A	protein-coding
chr17	5660313	5661272	intron (NM_146073, intron 2 of 8)	intron (NM_146073, intron 2 of 8)	-137865	NR_045081	78512	Mm.23696	NR_045079	ENSMUSG00000096965	3300005D01Rik	-	RIKEN cDNA 3300005D01 gene	ncRNA
chr15	87152060	87152533	Intergenic	MTEa|LTR|ERVL-MaLR	-392003	NM_001252310	106014	Mm.244319	NM_134096	ENSMUSG00000054863	Tafa5	Fam19a5|Tafa-5|Tara-5	TAFA chemokine like family member 5	protein-coding
chr14	54261214	54261874	intron (NM_134076, intron 1 of 6)	intron (NM_134076, intron 1 of 6)	2261	NM_134076	105501	Mm.28771	NM_134076	ENSMUSG00000040997	Abhd4	1110035H23Rik|AI429574|Abh4	abhydrolase domain containing 4	protein-coding
chr13	116801039	116801874	TTS (NR_153406)	TTS (NR_153406)	36722	NR_153406	74680	Mm.488118	NR_153406	ENSMUSG00000114290	4930435F18Rik	-	RIKEN cDNA 4930435F18 gene	ncRNA
chr12	54454492	54455420	Intergenic	Intergenic	-63638	NR_033689	665239	Mm.26856	NR_033689		Gm7550	EG665239|Gm666	predicted gene 7550	ncRNA
chr8	48439207	48439762	intron (NM_011857, intron 2 of 28)	intron (NM_011857, intron 2 of 28)	235206	NM_001145937	23965	Mm.42191	NM_011857	ENSMUSG00000031561	Tenm3	2610100B16Rik|Odz1|Odz3|Ten-m3|mKIAA1455	teneurin transmembrane protein 3	protein-coding
chr6	141552133	141552774	intron (NR_149743, intron 9 of 14)	intron (NR_149743, intron 9 of 14)	28099	NM_021471	58807	Mm.284495	NM_021471	ENSMUSG00000030235	Slco1c1	OATP-14|OATP-F|Oatp2|Oatpf|Slc21a14	solute carrier organic anion transporter family, member 1c1	protein-coding
chrX	168676441	168676835	Intergenic	Intergenic	-2766	NM_001370792	17692	Mm.24248	NM_010832	ENSMUSG00000031358	Msl3	AU018931|Msl31|Msl3l1	MSL complex subunit 3	protein-coding
chr11	80283239	80284095	Intergenic	Intergenic	-17245	NM_139228	246104	Mm.194148	NM_139228	ENSMUSG00000017692	Rhbdl3	AI847581|Rhbdl4|Rhomr1|Vrho	rhomboid like 3	protein-coding
chr1	80340703	80341328	promoter-TSS (NM_001313728)	promoter-TSS (NM_001313728)	-325	NM_001313728	26554	Mm.12665	NM_016716	ENSMUSG00000004364	Cul3	KIAA0617	cullin 3	protein-coding
chr16	55920689	55921126	intron (NM_028815, intron 6 of 10)	intron (NM_028815, intron 6 of 10)	13941	NM_001159364	74201	Mm.178427	NM_028815	ENSMUSG00000022604	Cep97	2810403B08Rik|4932439K18Rik|AA437768|E130116N02Rik|Lrriq2	centrosomal protein 97	protein-coding
chr6	120721248	120721902	intron (NM_001128151, intron 2 of 18)	intron (NM_001128151, intron 2 of 18)	-52193	NM_001081048	71803	Mm.425340	NM_001081048	ENSMUSG00000004902	Slc25a18	1500015I14Rik|AW125787	solute carrier family 25 (mitochondrial carrier), member 18	protein-coding
chr10	76691427	76691968	Intergenic	Intergenic	34347	NM_009933	12833	Mm.2509	NM_009933	ENSMUSG00000001119	Col6a1	AI747156|Col6a-1	collagen, type VI, alpha 1	protein-coding
chr10	39373621	39374046	intron (NM_001122893, intron 1 of 13)	intron (NM_001122893, intron 1 of 13)	4034	NM_001122893	14360	Mm.4848	NM_008054	ENSMUSG00000019843	Fyn	AI448320|AW552119	Fyn proto-oncogene	protein-coding
chr3	133529425	133530237	intron (NM_001040400, intron 1 of 10)	intron (NM_001040400, intron 1 of 10)	14559	NM_001040400	214133	Mm.347816	NM_145989	ENSMUSG00000040943	Tet2	Ayu17-449|E130014J05Rik|mKIAA1546	tet methylcytosine dioxygenase 2	protein-coding
chr2	174477824	174478365	Intergenic	Intergenic	-5153	NM_025531	66390	Mm.182294	NM_025531	ENSMUSG00000016257	Prelid3b	2310042G06Rik|AA407013|Slmo2	PRELI domain containing 3B	protein-coding
chr4	106794422	106795048	intron (NM_001347159, intron 1 of 15)	intron (NM_001347159, intron 1 of 15)	5096	NM_025590	329910	Mm.222956	NM_025590	ENSMUSG00000034853	Acot11	1110020M10Rik|2010309H15Rik|AW060409|BFIT|BFIT1|Thea|Them1|mKIAA0707	acyl-CoA thioesterase 11	protein-coding
chr12	109790269	109790839	Intergenic	MLTR11A|LTR|ERVK	42676	NR_037233	100499517		NR_037233	ENSMUSG00000093351	Mir3072	mir-3072|mmu-mir-3072	microRNA 3072	ncRNA
chr8	119111987	119112807	intron (NM_019707, intron 7 of 13)	intron (NM_019707, intron 7 of 13)	-232141	NM_024219	68196	Mm.358714	NM_024219	ENSMUSG00000031839	Hsbp1	0610007A03Rik|AA408769|Hsp25	heat shock factor binding protein 1	protein-coding
chr17	77499619	77500349	Intergenic	Lx7|LINE|L1	-700264	NM_015800	50766	Mm.311912	NM_015800	ENSMUSG00000024074	Crim1	AU015004	cysteine rich transmembrane BMP regulator 1 (chordin like)	protein-coding
chr1	194773444	194774343	intron (NM_008882, intron 12 of 31)	intron (NM_008882, intron 12 of 31)	-48108	NR_039539	100628615		NR_039539	ENSMUSG00000092633	Mir3962	mmu-mir-3962|mu-mir-3962	microRNA 3962	ncRNA
chr14	17606057	17606817	Intergenic	MTE2b|LTR|ERVL-MaLR	-54523	NM_001113417	21834	Mm.32563	NM_009380	ENSMUSG00000021779	Thrb	Nr1a2|T3R[b]|T3Rbeta|Thrb1|Thrb2|c-erbAbeta	thyroid hormone receptor beta	protein-coding
chr4	150887697	150888198	Intergenic	Intergenic	21974	NM_020569	57320	Mm.277349	NM_020569	ENSMUSG00000028964	Park7	DJ-1|Dj1	Parkinson disease (autosomal recessive, early onset) 7	protein-coding
chr4	88446774	88447948	Intergenic	Intergenic	-8435	NM_025760	66775	Mm.386788	NM_025760	ENSMUSG00000028497	Hacd4	4933428I03Rik|Hcad4|Ptplad2	3-hydroxyacyl-CoA dehydratase 4	protein-coding
chr5	106795747	106796577	Intergenic	Intergenic	-99332	NM_026856	52397	Mm.249474	NM_026856	ENSMUSG00000049606	Zfp644	1110068L01Rik|AA408882|BM-005|D5Ertd689e|Zep-2	zinc finger protein 644	protein-coding
chr10	43044056	43044572	intron (NM_175407, intron 5 of 6)	intron (NM_175407, intron 5 of 6)	-53152	NR_153349	327749	Mm.428887	NR_153349		Gm5079	C230040G06	predicted gene 5079	ncRNA
chr3	123076668	123077253	3' UTR (NM_080451, exon 5 of 5)	3' UTR (NM_080451, exon 5 of 5)	-41973	NM_001355462	59006	Mm.141157	NM_021503	ENSMUSG00000028116	Myoz2	1110012I24Rik|Fatz-2|Myozl2	myozenin 2	protein-coding
chr8	45410067	45411495	promoter-TSS (NM_126166)	promoter-TSS (NM_126166)	-162	NM_126166	142980	Mm.33874	NM_126166	ENSMUSG00000031639	Tlr3	AI957183	toll-like receptor 3	protein-coding
chr10	122096961	122097750	promoter-TSS (NM_153059)	promoter-TSS (NM_153059)	-185	NM_001364706	216395	Mm.236764	NM_153059	ENSMUSG00000034620	Rxylt1	6330415D21Rik|Tmem5	ribitol xylosyltransferase 1	protein-coding
chr5	150882503	150883147	Intergenic	RLTR11A2|LTR|ERVK	-69782	NM_013823	16591	Mm.6500	NM_013823	ENSMUSG00000058488	Kl	alpha-kl	klotho	protein-coding
chr14	3709289	3710097	intron (NM_001270806, intron 4 of 4).2	intron (NM_001270806, intron 4 of 4).2	20974	NM_001256501	100041840	Mm.491031	NM_001256501	ENSMUSG00000072739	Gm10408	100040797|Gm2971	predicted gene 10408	protein-coding
chr7	35373528	35374376	intron (NM_027897, intron 7 of 14)	B1F|SINE|Alu	22815	NM_178643	101831	Mm.389855	NM_178643	ENSMUSG00000030493	Faap24	AW124591|AW538696|C230052I12Rik	Fanconi anemia core complex associated protein 24	protein-coding
chr17	12080911	12081485	Intergenic	Intergenic	-38086	NM_026644	68262	Mm.258300	NM_026644	ENSMUSG00000023827	Agpat4	1500003P24Rik	1-acylglycerol-3-phosphate O-acyltransferase 4 (lysophosphatidic acid acyltransferase, delta)	protein-coding
chr3	84642842	84643642	Intergenic	Intergenic	-22950	NM_177260	320782	Mm.107370	NM_177260	ENSMUSG00000056498	Tmem154	9930117H01Rik	transmembrane protein 154	protein-coding
chr10	61281867	61282744	Intergenic	Intergenic	-8886	NR_157278	237360	Mm.333252	NM_001081127	ENSMUSG00000059901	Adamts14	Adamts-14|TS14	a disintegrin-like and metallopeptidase (reprolysin type) with thrombospondin type 1 motif, 14	protein-coding
chr5	92913554	92914161	intron (NM_001077596, intron 1 of 9)	L2b|LINE|L2	15864	NM_001077596	27428	Mm.46014	NM_015756	ENSMUSG00000029381	Shroom3	AL022960|D5Ertd287e|Shrm|Shrm3	shroom family member 3	protein-coding
chr19	53142221	53142843	promoter-TSS (NM_001277100)	promoter-TSS (NM_001277100)	-224	NM_001164100	27360	Mm.426080	NM_013758	ENSMUSG00000025026	Add3	AI463285|R75380	adducin 3 (gamma)	protein-coding
chr14	5710891	5711245	Intergenic	Lx8|LINE|L1	30534	NM_001256886	100041678	Mm.443041	NM_001256886	ENSMUSG00000096003	Gm3500	100041758|Gm3401	predicted gene 3500	protein-coding
chr3	86866528	86867128	intron (NM_001357460, intron 2 of 16)	intron (NM_001357460, intron 2 of 16)	54056	NM_027539	70762	Mm.44490	NM_027539	ENSMUSG00000028078	Dclk2	6330415M09Rik|AU044875|CL2|CLICK2|Click-II|Dcamkl2	doublecortin-like kinase 2	protein-coding
chr14	111287305	111287564	Intergenic	Intergenic	-387681	NM_198865	75409	Mm.235097	NM_029273	ENSMUSG00000033214	Slitrk5	2610019D03Rik	SLIT and NTRK-like family, member 5	protein-coding
chr13	93245767	93246209	Intergenic	L1MA8|LINE|L1	-53571	NM_001361537	100715	Mm.242865	NM_133905	ENSMUSG00000042167	Tent2	8030446C20Rik|AI649009|GLD-2|Gld2|Papd4	terminal nucleotidyltransferase 2	protein-coding
chr11	54042854	54043563	Intergenic	Intergenic	-15104	NM_001330304	30805	Mm.274590	NM_019687	ENSMUSG00000020334	Slc22a4	Octn1	solute carrier family 22 (organic cation transporter), member 4	protein-coding
chr9	75580273	75580917	intron (NM_001038710, intron 7 of 9)	B3|SINE|B2	18538	NM_001038710	50876	Mm.291880	NM_016711	ENSMUSG00000032186	Tmod2	N-Tmod|NTMOD	tropomodulin 2	protein-coding
chr10	127979708	127980652	Intergenic	B2_Mm1a|SINE|B2	27328	NM_013786	27400	Mm.26719	NM_013786	ENSMUSG00000025396	Hsd17b6	17betaHSD9|Hsd17b9|Rdh8	hydroxysteroid (17-beta) dehydrogenase 6	protein-coding
chr10	120584231	120584755	Intergenic	MLT1D|LTR|ERVL-MaLR	-108024	NM_010441	15364	Mm.157190	NM_010441	ENSMUSG00000056758	Hmga2	9430083A20Rik|HMGI-C|Hmgic|pg|pygmy	high mobility group AT-hook 2	protein-coding
chr3	138558205	138559057	3' UTR (NM_001313980, exon 8 of 8)	3' UTR (NM_001313980, exon 8 of 8)	31363	NM_001313980	13684	Mm.3941	NM_007917	ENSMUSG00000028156	Eif4e	EG668879|Eif4e-ps|If4e|eIF-4E	eukaryotic translation initiation factor 4E	protein-coding
chr13	70491098	70491927	Intergenic	Intergenic	-81729	NR_045934	73584	Mm.442491	NR_045934	ENSMUSG00000101051	1700100L14Rik	-	RIKEN cDNA 1700100L14 gene	ncRNA
chr10	108393362	108393695	intron (NM_054056, intron 4 of 6)	intron (NM_054056, intron 4 of 6)	-23723	NR_155870	102640148	Mm.336104	NR_155870	ENSMUSG00000112532	Gm36283	-	predicted gene, 36283	ncRNA
chr2	84678109	84678706	promoter-TSS (NM_001290751)	promoter-TSS (NM_001290751)	5	NM_025885	381379	Mm.219643	NM_025885	ENSMUSG00000027080	Med19	2410018M14Rik|3110040A13Rik|LCMR1	mediator complex subunit 19	protein-coding
chr13	69567118	69567840	Intergenic	Intergenic	-33615	NM_198600	210106	Mm.315959	NM_198600	ENSMUSG00000034575	Tent4a	LAK-1|POLK|Papd7|Pols|TRF4|TRF4-1	terminal nucleotidyltransferase 4A	protein-coding
chrX	147948041	147948536	Intergenic	Intergenic	-44705	NM_001198988	666184	Mm.422381	NM_001198988	ENSMUSG00000072931	Gm15080	Ott-like	predicted gene 15080	protein-coding
chr1	178746629	178747236	intron (NM_001161665, intron 4 of 14)	intron (NM_001161665, intron 4 of 14)	217807	NM_001161665	269152	Mm.129727	NM_177724	ENSMUSG00000026494	Kif26b	4832420M10|BC056349|D230039L06Rik	kinesin family member 26B	protein-coding
chr10	128141495	128141954	intron (NM_001039080, intron 6 of 13)	intron (NM_001039080, intron 6 of 13)	34844	NM_019711	56516	Mm.42247	NM_019711	ENSMUSG00000040043	Rbms2	2610315E04Rik|Scr3	RNA binding motif, single stranded interacting protein 2	protein-coding
chr6	126746465	126747204	Intergenic	MLT1I-int|LTR|ERVL-MaLR	-6160	NM_013568	16494	Mm.62535	NM_013568	ENSMUSG00000038077	Kcna6	Kv1.6|MK1.6	potassium voltage-gated channel, shaker-related, subfamily, member 6	protein-coding
chr11	52714740	52715140	Intergenic	Intergenic	-49766	NM_177059	320027	Mm.44518	NM_177059	ENSMUSG00000036264	Fstl4	B230374F23Rik|SPIG1|mKIAA1061	follistatin-like 4	protein-coding
chr6	40573646	40574185	TTS (NM_021364)	TTS (NM_021364)	2527	NM_146383	258381	Mm.377469	NM_146383	ENSMUSG00000045514	Olfr460	MOR120-2	olfactory receptor 460	protein-coding
chr10	99506805	99506993	Intergenic	(TTCTC)n|Simple_repeat|Simple_repeat	-102272	NR_038019	100504202	Mm.403801	NR_038019	ENSMUSG00000111962	Gm20110	-	predicted gene, 20110	ncRNA
chr17	41931398	41932279	Intergenic	ORR1F|LTR|ERVL-MaLR	-384109	NM_028474	627626	Mm.390999	NM_028474	ENSMUSG00000042256	Ptchd4	3110082D06Rik|Gm321	patched domain containing 4	protein-coding
chr6	125341768	125342858	intron (NM_011324, intron 7 of 11)	(TTTTG)n|Simple_repeat|Simple_repeat	-7410	NM_011609	21937	Mm.1258	NM_011609	ENSMUSG00000030341	Tnfrsf1a	CD120a|FPF|TNF-R|TNF-R-I|TNF-R1|TNF-R55|TNF-alphaR1|TNFAR|TNFR60|TNFRI|TNFRp55|TNFalpha-R1|Tnfr-2|Tnfr1|p55|p55-R	tumor necrosis factor receptor superfamily, member 1a	protein-coding
chr5	16128122	16128679	intron (NM_001110843, intron 3 of 38)	intron (NM_001110843, intron 3 of 38)	193709	NM_001110845	12293	Mm.159842	NM_009784	ENSMUSG00000040118	Cacna2d1	Ca(v)alpha2delta1|Cacna2|Cchl2a	calcium channel, voltage-dependent, alpha2/delta subunit 1	protein-coding
chr11	60352736	60353256	promoter-TSS (NM_029044)	promoter-TSS (NM_029044)	-91	NM_001039093	216810	Mm.218875	NM_153080	ENSMUSG00000000538	Tom1l2	2900016I08Rik|A730055F12Rik|AU042072|Srebf1	target of myb1-like 2 (chicken)	protein-coding
chr4	153305239	153305884	Intergenic	Intergenic	177269	NM_001099299	230959	Mm.318874	NM_001099299	ENSMUSG00000039546	Ajap1	Gm573	adherens junction associated protein 1	protein-coding
chr9	35439776	35440108	Intergenic	Intergenic	-12134	NM_021339	57810	Mm.80509	NM_021339	ENSMUSG00000038119	Cdon	CDO|Cd0|Orcam	cell adhesion molecule-related/down-regulated by oncogenes	protein-coding
chr3	82654838	82655688	Intergenic	Intergenic	-107178	NM_008731	18167	Mm.1433	NM_008731	ENSMUSG00000028004	Npy2r	NPY2-R	neuropeptide Y receptor Y2	protein-coding
chr13	71272731	71273598	Intergenic	RLTR24|LTR|ERV1	166075	NR_130325	100316804		NR_130325	ENSMUSG00000080580	Mir466f-4	Mirn466f-4|mmu-mir-466f-4	microRNA 466f-4	ncRNA
chr8	84721847	84722906	intron (NM_010906, intron 6 of 8)	PB1D10|SINE|Alu	20919	NM_008535	17095	Mm.4925	NM_008535	ENSMUSG00000034041	Lyl1	Lyl-1|bHLHa18	lymphoblastomic leukemia 1	protein-coding
chr9	109023279	109023861	intron (NR_153430, intron 9 of 13)	intron (NR_153430, intron 9 of 13)	-14997	NM_025858	66940	Mm.196533	NM_025858	ENSMUSG00000025647	Shisa5	2310008D10Rik|6430628I05Rik|Scotin|mShisa5	shisa family member 5	protein-coding
chr16	18754161	18754341	Intergenic	(TTCTC)n|Simple_repeat|Simple_repeat	-22596	NM_013805	12741	Mm.22768	NM_013805	ENSMUSG00000041378	Cldn5	AI854493|MBEC1|Tmvcf	claudin 5	protein-coding
chr17	28922067	28922714	Intergenic	Intergenic	-7066	NM_172450	207819	Mm.248931	NM_172450	ENSMUSG00000048905	4930539E08Rik	9130014G02	RIKEN cDNA 4930539E08 gene	protein-coding
chr13	60414573	60415050	Intergenic	Intergenic	-187136	NM_029653	69635	Mm.24103	NM_029653	ENSMUSG00000021559	Dapk1	D13Ucla1|DAP-Kinase	death associated protein kinase 1	protein-coding
chr17	31451241	31451800	intron (NM_008804, intron 7 of 18)	intron (NM_008804, intron 7 of 18)	60967	NM_021322	57773	Mm.143771	NM_021322	ENSMUSG00000024037	Wdr4	AI415180|AI448349|D530049K22Rik|Wh	WD repeat domain 4	protein-coding
chr16	93711438	93711977	promoter-TSS (NM_026700)	promoter-TSS (NM_026700)	-200	NM_026700	70028	Mm.23230	NM_026700	ENSMUSG00000022946	Dop1b	0610038M01Rik|2610510B01Rik|AI503246|C21orf5|Dopey2|mKIAA0933	DOP1 leucine zipper like protein B	protein-coding
chr9	121491706	121492144	intron (NM_031161, intron 2 of 2)	intron (NM_031161, intron 2 of 2)	3769	NM_001284508	12424	Mm.2619	NM_031161	ENSMUSG00000032532	Cck	-	cholecystokinin	protein-coding
chr2	37628542	37629021	intron (NM_001355259, intron 6 of 18)	intron (NM_001355259, intron 6 of 18)	32206	NM_001355259	20744	Mm.237095	NM_009261	ENSMUSG00000026915	Strbp	6430510M02Rik|AI852513|C230082I21Rik|C86322|Spnr	spermatid perinuclear RNA binding protein	protein-coding
chr2	143267951	143268566	Intergenic	Intergenic	189865	NM_020595	57329	Mm.157751	NM_020595	ENSMUSG00000027416	Otor	CDRAP|Fdp|MIA|MIAL	otoraplin	protein-coding
chr11	43684387	43684967	intron (NM_001363141, intron 1 of 2)	intron (NM_001363141, intron 1 of 2)	2679	NM_001363141	70802	Mm.397449	NM_027557	ENSMUSG00000044950	Pwwp2a	4631424J17Rik|AI891583|AU024105|D930040F23Rik	PWWP domain containing 2A	protein-coding
chr12	75908239	75908752	promoter-TSS (NR_039560)	promoter-TSS (NR_039560)	-608	NR_039560	100628610		NR_039560	ENSMUSG00000092922	Mir5101	mmu-mir-5101|mu-mir-5101	microRNA 5101	ncRNA
chr5	97111456	97112032	promoter-TSS (NM_001359913)	promoter-TSS (NM_001359913)	-148	NM_001359913	231474	Mm.332505	NM_198422	ENSMUSG00000055725	Paqr3	6330415A20Rik|AY424292|RKTG	progestin and adipoQ receptor family member III	protein-coding
chr17	68466926	68467758	intron (NM_177278, intron 10 of 20)	L1M3|LINE|L1	193545	NM_177278	320858	Mm.137356	NM_177278	ENSMUSG00000041565	L3mbtl4	A730037L19Rik|D930040M24Rik	L3MBTL4 histone methyl-lysine binding protein	protein-coding
chr9	108347723	108348857	intron (NM_001311157, intron 1 of 20)	CpG	459	NM_011678	22258	Mm.3974	NM_011678	ENSMUSG00000032612	Usp4	F730026I20Rik|Unp|mKIAA4155	ubiquitin specific peptidase 4 (proto-oncogene)	protein-coding
chr3	101840575	101841023	Intergenic	Intergenic	-4576	NM_172295	242125	Mm.32900	NM_172295	ENSMUSG00000044313	Mab21l3	-	mab-21-like 3	protein-coding
chr11	82094034	82094645	Intergenic	L1MCb|LINE|L1	-7506	NM_011331	20293	Mm.867	NM_011331	ENSMUSG00000035352	Ccl12	MCP-5|Scya12	chemokine (C-C motif) ligand 12	protein-coding
chr2	43931403	43932217	intron (NM_001364029, intron 5 of 12)	RLTR34D_MM|LTR|ERVK	133514	NR_040622	320872	Mm.445023	NR_040622	ENSMUSG00000085089	Arhgap15os	A430092G05Rik	Rho GTPase activating protein 15, opposite strand	ncRNA
chr2	157082599	157083303	Intergenic	Intergenic	-3686	NM_001164663	320706	Mm.79466	NM_001164663	ENSMUSG00000055485	Soga1	9830001H06Rik|AI426038|D430036N24Rik|Soga	suppressor of glucose, autophagy associated 1	protein-coding
chr5	130575622	130576227	intron (NM_181045, intron 3 of 6)	MTE2b|LTR|ERVL-MaLR	127132	NM_021371	140904	Mm.40875	NM_021371	ENSMUSG00000060371	Caln1	9630012C17Rik|Cabp8|MNCb-0849	calneuron 1	protein-coding
chr3	86246511	86246742	intron (NM_030695, intron 2 of 56)	CT-rich|Low_complexity|Low_complexity	21936	NM_030695	80877	Mm.439825	NM_030695	ENSMUSG00000028080	Lrba	C80285|D3Ertd775e|Lab300|Lba	LPS-responsive beige-like anchor	protein-coding
chr4	83623228	83623581	intron (NM_001355378, intron 10 of 25)	intron (NM_001355378, intron 10 of 25)	97828	NM_001369173	320226	Mm.180032	NM_029117	ENSMUSG00000052407	Ccdc171	4930418J05Rik|4930473A06Rik|A330015D16Rik	coiled-coil domain containing 171	protein-coding
chr1	88387933	88388471	intron (NM_134252, intron 26 of 26)	intron (NM_134252, intron 26 of 26)	-18808	NM_029269	75396	Mm.173058	NM_029269	ENSMUSG00000026295	Spp2	0610038O04Rik|pp-24|spp24	secreted phosphoprotein 2	protein-coding
chr6	41662267	41662641	intron (NM_001007572, intron 8 of 14)	intron (NM_001007572, intron 8 of 14)	18269	NM_001007572	194352	Mm.135734	NM_001007572	ENSMUSG00000036899	Trpv5	CAT2|D630033B11|ECAC1	transient receptor potential cation channel, subfamily V, member 5	protein-coding
chr3	123309033	123309476	intron (NM_027135, intron 8 of 22)	intron (NM_027135, intron 8 of 22)	41758	NM_027135	69608	Mm.29293	NM_027135	ENSMUSG00000039234	Sec24d	2310020L09Rik|Gm1349	Sec24 related gene family, member D (S. cerevisiae)	protein-coding
chr8	126372590	126373133	intron (NM_175434, intron 2 of 6)	L1MEg|LINE|L1	-49640	NM_174987	67892	Mm.31946	NM_174987	ENSMUSG00000051671	Coa6	1810063B05Rik|AI447995	cytochrome c oxidase assembly factor 6	protein-coding
chr10	66864008	66864972	Intergenic	Intergenic	55894	NR_138560	68488	Mm.338835	NR_138560		1110002J07Rik	-	RIKEN cDNA 1110002J07 gene	ncRNA
chr10	76943787	76944313	intron (NM_001347216, intron 1 of 15)	L1MB5|LINE|L1	17897	NM_001347216	59093	Mm.272803	NM_021568	ENSMUSG00000001120	Pcbp3	AlphaCP-3	poly(rC) binding protein 3	protein-coding
chr17	35777449	35778241	intron (NR_045459, intron 2 of 2)	B4A|SINE|B4	5395	NR_045459	74601	Mm.410840	NR_045459	ENSMUSG00000092171	4833427F10Rik	-	RIKEN cDNA 4833427F10 gene	ncRNA
chr18	75981893	75982756	intron (NM_145356, intron 2 of 4)	intron (NM_145356, intron 2 of 4)	-77002	NM_001357506	207259	Mm.159332	NM_145356	ENSMUSG00000044646	Zbtb7c	B230208J24Rik|Kr-pok|Zbtb36	zinc finger and BTB domain containing 7C	protein-coding
chr19	58043368	58044250	intron (NM_181415, intron 28 of 28)	intron (NM_181415, intron 28 of 28)	-7358	NR_049196	100885835		NR_049196	ENSMUSG00000093757	Mir5623	Gm26068|mir-5623|mmu-mir-5623	microRNA 5623	ncRNA
chr13	108881232	108882246	intron (NM_011056, intron 2 of 16)	intron (NM_011056, intron 2 of 16)	227562	NM_011056	238871	Mm.434429	NM_011056	ENSMUSG00000021699	Pde4d	9630011N22Rik|Dpde3	phosphodiesterase 4D, cAMP specific	protein-coding
chr3	149052522	149052940	Intergenic	(TTAGGG)n|Simple_repeat|Simple_repeat	-98096	NM_001081298	99633	Mm.9776	NM_001081298	ENSMUSG00000028184	Adgrl2	AI450192|CIRL-2|Gm619|Lec1|Lphh1|Lphn2|mKIAA0786	adhesion G protein-coupled receptor L2	protein-coding
chr13	14043326	14044119	Intergenic	RodERV21-int|LTR|ERV1	-4084	NM_178337	70430	Mm.260209	NM_178337	ENSMUSG00000039233	Tbce	2610206D02Rik|C530005D02Rik|pmn	tubulin-specific chaperone E	protein-coding
chr8	10767954	10768770	Intergenic	Intergenic	114092	NR_040705	320014	Mm.403203	NR_040705	ENSMUSG00000109473	B930025P03Rik	-	RIKEN cDNA B930025P03 gene	ncRNA
chr8	117222033	117222664	Intergenic	Intergenic	-34671	NM_001163262	74440	Mm.233181	NM_028941	ENSMUSG00000034390	Cmip	4933407C03Rik|5830471E12Rik|AI314065|AI464126	c-Maf inducing protein	protein-coding
chr4	153661512	153661962	Intergenic	Intergenic	-178907	NM_001099299	230959	Mm.318874	NM_001099299	ENSMUSG00000039546	Ajap1	Gm573	adherens junction associated protein 1	protein-coding
chr10	67979378	67979928	promoter-TSS (NM_001359319)	promoter-TSS (NM_001359319)	83	NM_001359319	170799	Mm.209844	NM_133244	ENSMUSG00000037846	Rtkn2	B130039D23Rik|Mbf|Plekhk1	rhotekin 2	protein-coding
chr15	27984111	27984825	intron (NM_001081302, intron 1 of 56)	intron (NM_001081302, intron 1 of 56)	41380	NM_001081302	223435	Mm.485422	NM_001081302	ENSMUSG00000022263	Trio	6720464I07Rik|AA408740|Solo	triple functional domain (PTPRF interacting)	protein-coding
chr13	28886576	28887033	Intergenic	Intergenic	-1382	NR_045054	72518	Mm.37454	NR_045053		2610307P16Rik	AI666457	RIKEN cDNA 2610307P16 gene	ncRNA
chr2	27301440	27302177	intron (NR_133905, intron 4 of 29)	intron (NR_133905, intron 4 of 29)	-54505	NM_138665	192166	Mm.278467	NM_138665	ENSMUSG00000009614	Sardh	-	sarcosine dehydrogenase	protein-coding
chr3	35112850	35113674	Intergenic	Intergenic	-190611	NR_105799	102466155		NR_105799	ENSMUSG00000098862	Mir6378	Gm27706|mmu-mir-6378	microRNA 6378	ncRNA
chr9	68190410	68191180	Intergenic	Intergenic	-165081	NR_045745	434412	Mm.490707	NR_045745	ENSMUSG00000111841	Gm20745	-	predicted gene, 20745	ncRNA
chr13	9398376	9398556	intron (NM_001081426, intron 1 of 36)	(GAGAA)n|Simple_repeat|Simple_repeat	121941	NM_001081426	208440	Mm.217326	NM_172459	ENSMUSG00000048264	Dip2c	2900024P20Rik|9630044M06|mKIAA0934	disco interacting protein 2 homolog C	protein-coding
chr13	39951720	39952385	Intergenic	Intergenic	335959	NM_172143	218165	Mm.364096	NM_172143	ENSMUSG00000047094	Ofcc1	opo	orofacial cleft 1 candidate 1	protein-coding
chr18	87748904	87749902	Intergenic	MTEa|LTR|ERVL-MaLR	1037092	NM_001361145	12405	Mm.70775	NM_172633	ENSMUSG00000024647	Cbln2	6330593N19Rik|A730004O05	cerebellin 2 precursor protein	protein-coding
chr2	163966260	163967086	Intergenic	Intergenic	-28524	NM_018753	54401	Mm.34319	NM_018753	ENSMUSG00000018326	Ywhab	1300003C17Rik|14-3-3b	tyrosine 3-monooxygenase/tryptophan 5-monooxygenase activation protein, beta polypeptide	protein-coding
chr6	95002947	95003527	Intergenic	Intergenic	59403	NR_040761	78773	Mm.67065	NR_040761	ENSMUSG00000108187	4930511E03Rik	-	RIKEN cDNA 4930511E03 gene	ncRNA
chr14	84671282	84672516	Intergenic	MER20|DNA|hAT-Charlie	-195475	NR_015539	319903	Mm.440481	NR_015539	ENSMUSG00000115529	9630013A20Rik	lncOL1	RIKEN cDNA 9630013A20 gene	ncRNA
chr14	13919888	13920329	Intergenic	Intergenic	41205	NM_001359900	66231	Mm.295875	NM_025435	ENSMUSG00000053453	Thoc7	Nif3l1bp1	THO complex 7	protein-coding
chr14	5557414	5557934	Intergenic	Intergenic	41395	NM_001256885	100041735	Mm.464176	NM_001256885	ENSMUSG00000095295	Gm3488	100041747|Gm3494	predicted gene, 3488	protein-coding
chr1	188730921	188731917	intron (NM_021408, intron 40 of 70)	intron (NM_021408, intron 40 of 70)	276421	NM_001359578	226823	Mm.209880	NM_172650	ENSMUSG00000026608	Kctd3	4930438A20Rik|9330185B06|E330032J19Rik|NY-REN-45	potassium channel tetramerisation domain containing 3	protein-coding
chr11	110546441	110546920	Intergenic	Intergenic	67340	NM_001356346	26399	Mm.14487	NM_011943	ENSMUSG00000020623	Map2k6	MAPKK 6|MAPKK6|MEK6|MKK6|Prkmk6|SAPKK3	mitogen-activated protein kinase kinase 6	protein-coding
chr1	55499057	55499570	intron (NM_001114663, intron 1 of 5)	intron (NM_001114663, intron 1 of 5)	93367	NM_001114663	227120	Mm.194183	NM_001114663	ENSMUSG00000038349	Plcl1	C230017K02Rik|PLC-L|PLC-L1|PLCE|PLCL|PLDL1|PRIP|PRIP-1	phospholipase C-like 1	protein-coding
chr5	142385872	142386572	Intergenic	RSINE1|SINE|B4	-15275	NM_199068	17425	Mm.24214	NM_010812	ENSMUSG00000056493	Foxk1	A630048H08Rik|AI463295|Gm10868|Mnf	forkhead box K1	protein-coding
chr17	86356956	86357750	intron (NM_011104, intron 2 of 14)	intron (NM_011104, intron 2 of 14)	-70175	NR_045435	72104	Mm.443401	NR_045435	ENSMUSG00000100738	2010106C02Rik	-	RIKEN cDNA 2010106C02 gene	ncRNA
chr8	8836092	8836520	Intergenic	(CCCCAG)n|Simple_repeat|Simple_repeat	-145769	NM_176849	234023	Mm.251655	NM_176849	ENSMUSG00000040459	Arglu1	9430010O03Rik|C130008N12	arginine and glutamate rich 1	protein-coding
chr18	57741251	57741767	Intergenic	ID_B1|SINE|B4	38486	NR_152224	100503033	Mm.381112	NR_152224	ENSMUSG00000118391	Gm19519	-	predicted gene, 19519	ncRNA
chr7	68749242	68749659	promoter-TSS (NM_025549)	promoter-TSS (NM_025549)	-212	NM_025549	66412	Mm.251199	NM_025549	ENSMUSG00000042659	Arrdc4	2410003C09Rik|AV216361	arrestin domain containing 4	protein-coding
chr14	3747703	3748110	intron (NR_038059, intron 1 of 3)	intron (NR_038059, intron 1 of 3)	4413	NR_038059	73549	Mm.398741	NR_038059	ENSMUSG00000079407	1700110I01Rik	100040740|1700016F01Rik|Gm2938	RIKEN cDNA 1700110I01 gene	ncRNA
chr11	92210274	92210668	Intergenic	B4A|SINE|B4	-632916	NM_028547	73470	Mm.67677	NM_028547	ENSMUSG00000046755	Kif2b	1700063D03Rik	kinesin family member 2B	protein-coding
chr11	66105655	66105886	intron (NM_001099633, intron 17 of 68)	(TATTG)n|Simple_repeat|Simple_repeat	-62265	NR_153847	100093714	Mm.465886	NR_153847		Gm12296	-	predicted gene 12296	ncRNA
chr17	72406470	72407069	intron (NM_007439, intron 1 of 28)	L1MC1|LINE|L1	197538	NM_007439	11682	Mm.311854	NM_007439	ENSMUSG00000055471	Alk	CD246|Tcrz	anaplastic lymphoma kinase	protein-coding
chr6	146479809	146480570	intron (NM_019923, intron 1 of 56)	intron (NM_019923, intron 1 of 56)	22034	NM_019923	16439	Mm.7800	NM_010586	ENSMUSG00000030287	Itpr2	AI649341|InsP3R-2|InsP3R-5|Ip3r2|Itpr5|insP3R2	inositol 1,4,5-triphosphate receptor 2	protein-coding
chr5	127420387	127421073	intron (NM_175432, intron 2 of 8)	MTEa|LTR|ERVL-MaLR	-139107	NR_038128	67351	Mm.320172	NR_038127	ENSMUSG00000087104	Tmem132cos	1700085B03Rik	transmembrane protein 132C, opposite strand	ncRNA
chr11	68413623	68414423	Intergenic	ORR1B1|LTR|ERVL-MaLR	-18102	NM_177320	320207	Mm.244960	NM_177320	ENSMUSG00000020901	Pik3r5	AV230647|F730038I15Rik|Foap2|p101	phosphoinositide-3-kinase regulatory subunit 5	protein-coding
chrX	79460539	79460739	intron (NM_001368718, intron 20 of 64)	(GAGAA)n|Simple_repeat|Simple_repeat	56712	NM_001368718	636104	Mm.459420	NM_001099307	ENSMUSG00000073077	Cfap47	100041373|Chdc2|Gm16462|Gm3297|Gm7173|Gm8787	cilia and flagella associated protein 47	protein-coding
chr8	45055530	45056056	Intergenic	ORR1D2|LTR|ERVL-MaLR	9625	NR_033588	434310	Mm.334512	NR_033588	ENSMUSG00000066158	AY512931	-	cDNA sequence AY512931	ncRNA
chr17	73270092	73270690	Intergenic	Intergenic	128905	NM_001033444	381122	Mm.81496	NM_001033444	ENSMUSG00000043705	Capn13	CANP 13|Gm943	calpain 13	protein-coding
chr17	77957454	77957818	Intergenic	MTEa|LTR|ERVL-MaLR	-242612	NM_015800	50766	Mm.311912	NM_015800	ENSMUSG00000024074	Crim1	AU015004	cysteine rich transmembrane BMP regulator 1 (chordin like)	protein-coding
chr5	105715290	105715883	intron (NM_178701, intron 1 of 2)	intron (NM_178701, intron 1 of 2)	14776	NM_178701	231549	Mm.23837	NM_178701	ENSMUSG00000046079	Lrrc8d	2810473G09Rik|4930525N13Rik|A930019F03|Lrrc5	leucine rich repeat containing 8D	protein-coding
chr6	114139474	114140399	intron (NM_172890, intron 4 of 13)	intron (NM_172890, intron 4 of 13)	8695	NM_172890	243616	Mm.44683	NM_172890	ENSMUSG00000030307	Slc6a11	D930045G19Rik|E130202I16Rik|GAT4|Gabt4|Gat3	solute carrier family 6 (neurotransmitter transporter, GABA), member 11	protein-coding
chr1	179628472	179629115	Intergenic	Intergenic	-39438	NM_178653	109232	Mm.136458	NM_178653	ENSMUSG00000038936	Sccpdh	AW214504|C330023F11Rik	saccharopine dehydrogenase (putative)	protein-coding
chr13	94242939	94243519	intron (NM_001346609, intron 2 of 8)	L1MC1|LINE|L1	42052	NM_029153	107767	Mm.201455	NM_029153	ENSMUSG00000021687	Scamp1	4930505M11Rik|AI415563|AW122395	secretory carrier membrane protein 1	protein-coding
chr5	73047628	73048188	intron (NM_028194, intron 54 of 62)	intron (NM_028194, intron 54 of 62)	41004	NM_173403	231290	Mm.491387	NM_173403	ENSMUSG00000029219	Slc10a4	E130304D01	solute carrier family 10 (sodium/bile acid cotransporter family), member 4	protein-coding
chr4	57486008	57486988	Intergenic	Intergenic	-81750	NM_172868	242481	Mm.331630	NM_172868	ENSMUSG00000090053	Palm2	53-H12|B130066I24|R75368|pEN70	paralemmin 2	protein-coding
chr10	73137303	73138520	Intergenic	Intergenic	-51206	NR_040646	327768	Mm.417745	NR_040646	ENSMUSG00000111994	A330049N07Rik	-	RIKEN cDNA A330049N07 gene	ncRNA
chr17	14264042	14265003	Intergenic	L1M3|LINE|L1	-14984	NM_022315	64074	Mm.30162	NM_022315	ENSMUSG00000023886	Smoc2	1700056C05Rik|5430426J21Rik|Smoc2l	SPARC related modular calcium binding 2	protein-coding
chr9	71580186	71580776	intron (NM_001033208, intron 1 of 12)	L1MB3|LINE|L1	11879	NM_001033208	102371	Mm.27585	NM_001033208	ENSMUSG00000041361	Myzap	AA407270|AV006038|Gcom1|Gm20502|Gm640|Grinl1a7|Myozap	myocardial zonula adherens protein	protein-coding
chr17	31232088	31232846	intron (NM_177823, intron 9 of 13)	intron (NM_177823, intron 9 of 13)	24401	NM_177823	328795	Mm.387930	NM_177823	ENSMUSG00000042345	Ubash3a	5830413C03Rik|C330001M22|Sts-2|TULA|TULA-1	ubiquitin associated and SH3 domain containing, A	protein-coding
chr4	130801793	130802536	intron (NM_011520, intron 1 of 4)	intron (NM_011520, intron 1 of 4)	9627	NM_011520	20970	Mm.206536	NM_011520	ENSMUSG00000025743	Sdc3	Synd3|mKIAA0468|syn-3	syndecan 3	protein-coding
chr2	135486870	135487527	Intergenic	(TTTTG)n|Simple_repeat|Simple_repeat	96022	NR_015544	320684	Mm.421433	NR_015544	ENSMUSG00000085631	9630028H03Rik	-	RIKEN cDNA 9630028H03 gene	ncRNA
chr15	11329774	11330541	intron (NM_175501, intron 21 of 23)	intron (NM_175501, intron 21 of 23)	69501	NM_033074	110960	Mm.286061	NM_033074	ENSMUSG00000022241	Tars	D15Wsu59e|ThrRS	threonyl-tRNA synthetase	protein-coding
chr12	110215345	110216278	Intergenic	Intergenic	-57738	NR_045466	67280	Mm.390495	NR_045466	ENSMUSG00000113331	3110009F21Rik	-	RIKEN cDNA 3110009F21 gene	ncRNA
chr3	58520600	58520992	Intergenic	Intergenic	-5025	NM_001005509	229317	Mm.21617	NM_001005509	ENSMUSG00000027810	Eif2a	D030048D22|D3Ertd194e	eukaryotic translation initiation factor 2A	protein-coding
chr2	152730052	152730855	Intergenic	MTEa|LTR|ERVL-MaLR	-5798	NM_010495	15901	Mm.444	NM_010495	ENSMUSG00000042745	Id1	AI323524|D2Wsu140e|Idb1|bHLHb24	inhibitor of DNA binding 1, HLH protein	protein-coding
chr11	108362930	108363780	Intergenic	Intergenic	-19467	NM_011101	18750	Mm.222178	NM_011101	ENSMUSG00000050965	Prkca	AI875142|Pkca	protein kinase C, alpha	protein-coding
chr12	75983027	75984133	intron (NM_001005510, intron 53 of 115)	intron (NM_001005510, intron 53 of 115)	74477	NR_039560	100628610		NR_039560	ENSMUSG00000092922	Mir5101	mmu-mir-5101|mu-mir-5101	microRNA 5101	ncRNA
chr17	57809290	57809805	intron (NM_001081653, intron 1 of 23)	intron (NM_001081653, intron 1 of 23)	40336	NM_001081653	620292	Mm.391030	NM_001081653	ENSMUSG00000038048	Cntnap5c	Caspr5-3|EG620292|Gm325	contactin associated protein-like 5C	protein-coding
chr17	31424807	31425539	intron (NM_008804, intron 4 of 18)	intron (NM_008804, intron 4 of 18)	38939	NM_008804	18585	Mm.10812	NM_008804	ENSMUSG00000041119	Pde9a	PDE9A1	phosphodiesterase 9A	protein-coding
chr8	120046598	120047231	intron (NM_001310635, intron 14 of 14)	intron (NM_001310635, intron 14 of 14)	54476	NM_030209	78892	Mm.264680	NM_030209	ENSMUSG00000031825	Crispld2	1810049K24Rik|Lcrisp2|Lgl1|coffeecrisp	cysteine-rich secretory protein LCCL domain containing 2	protein-coding
chr2	170185198	170185762	Intergenic	ID_B1|SINE|B4	8573	NR_157067	100502923	Mm.44078	NR_157067	ENSMUSG00000097514	Gm17619	-	predicted gene, 17619	ncRNA
chr18	67153142	67153679	intron (NM_177137, intron 4 of 11)	(TTTC)n|Simple_repeat|Simple_repeat	19850	NM_010307	14680	Mm.440746	NM_010307	ENSMUSG00000024524	Gnal	2610011C15Rik|9630020G10Rik|Galphaolf|Gna10|Golf	guanine nucleotide binding protein, alpha stimulating, olfactory type	protein-coding
chr10	78330714	78331392	intron (NM_053014, intron 1 of 9)	B1_Mur1|SINE|Alu	9154	NR_106119	102465765		NR_106119	ENSMUSG00000098885	Mir7659	Gm27433|mmu-mir-7659	microRNA 7659	ncRNA
chr15	79881634	79882070	Intergenic	Intergenic	-10556	NM_030255	80287	Mm.284059	NM_030255	ENSMUSG00000009585	Apobec3	Apobec|Arp3|BC003314|Cem15|Gm20117|Rfv3	apolipoprotein B mRNA editing enzyme, catalytic polypeptide 3	protein-coding
chr4	63154634	63155250	promoter-TSS (NM_007443)	promoter-TSS (NM_007443)	-770	NM_007443	11699	Mm.2197	NM_007443	ENSMUSG00000028356	Ambp	AI194774|ASPI|HI-30|Intin4|Itil|UTI	alpha 1 microglobulin/bikunin precursor	protein-coding
chr4	151563406	151564510	intron (NM_001081557, intron 4 of 23)	intron (NM_001081557, intron 4 of 23)	297810	NM_001081557	100072	Mm.318846	NM_001081557	ENSMUSG00000014592	Camta1	1810059M14Rik|2310058O09Rik|AI316882|AW987475|mKIAA0833	calmodulin binding transcription activator 1	protein-coding
chr10	51374360	51374766	Intergenic	RLTR24|LTR|ERV1	-106049	NM_001291892	14727	Mm.439661	NM_008147	ENSMUSG00000112023	Lilr4b	Gp49a|gp49	leukocyte immunoglobulin-like receptor, subfamily B, member 4B	protein-coding
chr10	62662067	62662758	intron (NM_001364705, intron 3 of 3)	MTE2b|LTR|ERVL-MaLR	-11194	NM_001358819	94213	Mm.114116	NM_053183	ENSMUSG00000020076	Ddx50	4933429B04Rik|8430408E17Rik|GU2|RH-II	DEAD (Asp-Glu-Ala-Asp) box polypeptide 50	protein-coding
chr18	56449004	56449305	intron (NM_026240, intron 1 of 13)	intron (NM_026240, intron 1 of 13)	17022	NM_026240	107022	Mm.24356	NM_026240	ENSMUSG00000001700	Gramd3	9030613F08Rik|9130427A09Rik|AW061306|Gramd2b|NS3TP2	GRAM domain containing 3	protein-coding
chr15	82894434	82895011	non-coding (NR_027799, exon 1 of 1)	non-coding (NR_027799, exon 1 of 1)	3739	NR_027799	21378	Mm.417272	NR_027799		Tbrg3	TB-11	transforming growth factor beta regulated gene 3	ncRNA
chr18	17979010	17979657	Intergenic	Intergenic	-398343	NR_045374	75162	Mm.60874	NR_045374	ENSMUSG00000117615	4930545E07Rik	-	RIKEN cDNA 4930545E07 gene	ncRNA
chr9	45635768	45636516	intron (NM_001081270, intron 3 of 32)	intron (NM_001081270, intron 3 of 32)	192521	NM_001081373	214552	Mm.260103	NM_001081373	ENSMUSG00000043987	Cep164	AI450905|BC027092|D030051D21	centrosomal protein 164	protein-coding
chr7	102210226	102211157	promoter-TSS (NM_001287166)	promoter-TSS (NM_001287166)	356	NM_001291358	233575	Mm.302013	NM_145583	ENSMUSG00000030990	Pgap2	1810006G21Rik|C76649|Frag1	post-GPI attachment to proteins 2	protein-coding
chr13	75931212	75931982	intron (NM_028493, intron 3 of 11)	intron (NM_028493, intron 3 of 11)	12227	NM_028493	73296	Mm.276200	NM_028493	ENSMUSG00000021589	Rhobtb3	1700040C17Rik|2610033K01Rik|4930503C18Rik|AI317148|AW208826|mKIAA0878	Rho-related BTB domain containing 3	protein-coding
chr10	68028324	68029346	intron (NM_001359318, intron 9 of 11)	intron (NM_001359318, intron 9 of 11)	49265	NM_001359319	170799	Mm.209844	NM_133244	ENSMUSG00000037846	Rtkn2	B130039D23Rik|Mbf|Plekhk1	rhotekin 2	protein-coding
chr14	97007952	97008529	Intergenic	Intergenic	-489206	NM_053105	93688	Mm.308735	NM_053105	ENSMUSG00000022076	Klhl1	mKIAA1490	kelch-like 1	protein-coding
chr4	41124133	41124610	promoter-TSS (NM_139236)	promoter-TSS (NM_139236)	-32	NM_139236	230082	Mm.285797	NM_139236	ENSMUSG00000028430	Nol6	AA410091|Nrap	nucleolar protein family 6 (RNA-associated)	protein-coding
chr2	116982537	116982976	Intergenic	MTC|LTR|ERVL-MaLR	82604	NR_040335	320975	Mm.132509	NR_040335	ENSMUSG00000085316	D330050G23Rik	-	RIKEN cDNA D330050G23 gene	ncRNA
chr18	65237772	65238406	intron (NR_105742, intron 4 of 6)	L1_Mus1|LINE|L1	-10772	NR_029600	387231		NR_029600	ENSMUSG00000065402	Mir122	Mir122a|Mirn122a|mir-122|mmu-mir-122	microRNA 122	ncRNA
chr16	95483166	95483691	intron (NM_001302179, intron 2 of 9)	intron (NM_001302179, intron 2 of 9)	-24080	NM_001302153	13876	Mm.164531	NM_133659	ENSMUSG00000040732	Erg	D030036I24Rik	ETS transcription factor	protein-coding
chr8	31175893	31176443	Intergenic	Intergenic	-7444	NM_026453	67920	Mm.289818	NM_026453	ENSMUSG00000031578	Mak16	2600016B03Rik|AI314911|Rbm13	MAK16 homolog	protein-coding
chr10	68139675	68140531	intron (NM_023598, intron 4 of 9)	intron (NM_023598, intron 4 of 9)	138623	NM_023598	71371	Mm.440357	NM_023598	ENSMUSG00000019947	Arid5b	4930580B11|5430435G07Rik|AI467247|Desrt|Mrf2|Mrf2alpha|Mrf2beta	AT rich interactive domain 5B (MRF1-like)	protein-coding
chr9	120154404	120154951	intron (NR_153958, intron 1 of 5)	intron (NR_153958, intron 1 of 5)	4935	NR_153959	17433	Mm.432562	NM_008614	ENSMUSG00000032517	Mobp	AI835053|AI839848|MOBP155|MOBP170|MOBP69|MOBP73|MOBP81|R74645	myelin-associated oligodendrocytic basic protein	protein-coding
chr5	116322666	116323395	Intergenic	Intergenic	10670	NR_110475	77846	Mm.404871	NR_110475	ENSMUSG00000086715	B230112J18Rik	-	RIKEN cDNA B230112J18 gene	ncRNA
chr1	39300896	39301568	intron (NM_008719, intron 5 of 20)	intron (NM_008719, intron 5 of 20)	-66619	NM_001252219	114641	Mm.379302	NM_053257	ENSMUSG00000073702	Rpl31	Dts	ribosomal protein L31	protein-coding
chr1	46666869	46667753	intron (NM_001310335, intron 41 of 64)	intron (NM_001310335, intron 41 of 64)	186307	NM_001356416	227059	Mm.233889	NM_172653	ENSMUSG00000025986	Slc39a10	2900042E17Rik|5430433I10|Zip10|mKIAA1265	solute carrier family 39 (zinc transporter), member 10	protein-coding
chr1	74065592	74066097	intron (NM_027884, intron 3 of 34)	MLT1F1|LTR|ERVL-MaLR	58704	NM_027884	21961	Mm.309975	NM_027884	ENSMUSG00000055322	Tns1	1110018I21Rik|1200014E20Rik|AI648117|E030018G17Rik|E030037J05Rik|Tns	tensin 1	protein-coding
chr19	22898139	22898576	intron (NM_001362499, intron 15 of 25)	intron (NM_001362499, intron 15 of 25)	-17603	NM_001362508	226025	Mm.131943	NM_177341	ENSMUSG00000052387	Trpm3	6330504P12Rik|9330180E14|AU018608|B930001P07Rik|LTRPC3|MLSN2	transient receptor potential cation channel, subfamily M, member 3	protein-coding
chr17	31564219	31564866	promoter-TSS (NM_016670)	promoter-TSS (NM_016670)	-231	NM_016670	18771	Mm.259295	NM_016670	ENSMUSG00000006705	Pknox1	D17Wsu76e|PREP1	Pbx/knotted 1 homeobox	protein-coding
chr14	76671281	76672013	Intergenic	Intergenic	-5921	NR_015485	73272	Mm.116804	NR_015485	ENSMUSG00000101009	1700108F19Rik	1700020I02Rik|BB065030	RIKEN cDNA 1700108F19 gene	ncRNA
chr10	68380188	68380544	Intergenic	Intergenic	-59224	NR_045357	75148	Mm.23505	NR_045357	ENSMUSG00000112157	4930545H06Rik	-	RIKEN cDNA 4930545H06 gene	ncRNA
chr5	74613316	74614064	intron (NM_001159577, intron 6 of 10)	intron (NM_001159577, intron 6 of 10)	64182	NM_001159580	16924	Mm.440403	NM_010727	ENSMUSG00000029228	Lnx1	Lnx	ligand of numb-protein X 1	protein-coding
chr7	136802933	136803409	Intergenic	(TAGA)n|Simple_repeat|Simple_repeat	-91440	NM_008598	17314	Mm.440219	NM_008598	ENSMUSG00000054612	Mgmt	AGT|AI267024|Agat	O-6-methylguanine-DNA methyltransferase	protein-coding
chr2	25983267	25983732	promoter-TSS (NM_001276360)	promoter-TSS (NM_001276360)	-217	NM_001276359	227634	Mm.36834	NM_001115076	ENSMUSG00000026933	Camsap1	9530003A05Rik|C77823|PRO2405	calmodulin regulated spectrin-associated protein 1	protein-coding
chr1	152069422	152070074	intron (NM_197990, intron 1 of 5)	intron (NM_197990, intron 1 of 5)	20572	NM_197990	69399	Mm.278031	NM_197990	ENSMUSG00000032666	1700025G04Rik	2610510E02Rik|2900042O04Rik	RIKEN cDNA 1700025G04 gene	protein-coding
chr19	55791670	55792719	intron (NM_001331150, intron 4 of 14)	intron (NM_001331150, intron 4 of 14)	50384	NM_001331149	21416	Mm.139815	NM_009333	ENSMUSG00000024985	Tcf7l2	TCF4B|TCF4E|Tcf-4|Tcf4	transcription factor 7 like 2, T cell specific, HMG box	protein-coding
chr5	111909994	111910546	Intergenic	Intergenic	-148542	NR_045833	269683	Mm.136946	NM_207252	ENSMUSG00000085271	E130006D01Rik	Gm16018|Gm681	RIKEN cDNA E130006D01 gene	ncRNA
chr8	39701470	39701945	Intergenic	Lx9|LINE|L1	-59029	NM_031195	20288	Mm.239291	NM_031195	ENSMUSG00000025044	Msr1	MRS-A|MSR|MSR-A|SR-AI|SR-AII|Scara1|Scvr	macrophage scavenger receptor 1	protein-coding
chrX	56820719	56821161	intron (NM_177293, intron 1 of 15)	intron (NM_177293, intron 1 of 15)	1385	NM_177293	320923	Mm.186745	NM_177293	ENSMUSG00000067878	Map7d3	4933424A10Rik|Mtap7d3	MAP7 domain containing 3	protein-coding
chr14	16360253	16360640	Intergenic	Intergenic	-4760	NM_009409	21974	Mm.130362	NM_009409	ENSMUSG00000017485	Top2b	D230016L12Rik|Top-2	topoisomerase (DNA) II beta	protein-coding
chr15	96988515	96988880	Intergenic	ORR1B1|LTR|ERVL-MaLR	31662	NM_001358060	69354	Mm.250980	NM_027052	ENSMUSG00000022464	Slc38a4	1110012E16Rik|1700012A18Rik|Ata3|mATA3|mNAT3	solute carrier family 38, member 4	protein-coding
chr2	179073678	179074432	Intergenic	Intergenic	-340881	NM_026596	68175	Mm.158187	NM_026596		4930591A17Rik	-	RIKEN cDNA 4930591A17 gene	protein-coding
chr14	21969150	21969811	Intergenic	Intergenic	20121	NM_145459	218820	Mm.292401	NM_145459	ENSMUSG00000039081	Zfp503	AI181838|B830002A16Rik|Nolz-1|Nolz1|Znf503	zinc finger protein 503	protein-coding
chr1	179162912	179164512	intron (NM_027188, intron 5 of 11)	intron (NM_027188, intron 5 of 11)	354329	NM_027188	69726	Mm.222338	NM_027188	ENSMUSG00000055067	Smyd3	2410008A19Rik|Zmynd1	SET and MYND domain containing 3	protein-coding
chr12	118020222	118020780	intron (NM_010060, intron 45 of 81)	intron (NM_010060, intron 45 of 81)	176640	NM_146040	217946	Mm.281149	NM_146040	ENSMUSG00000021175	Cdca7l	BC006933|JPO2	cell division cycle associated 7 like	protein-coding
chr7	28657068	28657513	Intergenic	PB1D7|SINE|Alu	-26377	NM_175319	101744	Mm.26022	NM_175319	ENSMUSG00000037469	Acp7	AU017076|C330005M16Rik|Papl	acid phosphatase 7, tartrate resistant	protein-coding
chr17	44457190	44457769	Intergenic	MTE2b|LTR|ERVL-MaLR	268907	NM_172621	224796	Mm.37666	NM_172621	ENSMUSG00000023959	Clic5	5730531E12Rik|B330005L24|Gm322|jbg|nmf318	chloride intracellular channel 5	protein-coding
chr4	154235230	154235740	intron (NM_001162977, intron 4 of 36)	MTD|LTR|ERVL-MaLR	64410	NM_001112744	230972	Mm.38481	NM_001112744	ENSMUSG00000029032	Arhgef16	-	Rho guanine nucleotide exchange factor (GEF) 16	protein-coding
chr13	69216053	69217152	Intergenic	Intergenic	-217061	NM_153534	210044	Mm.390617	NM_153534	ENSMUSG00000021536	Adcy2	mKIAA1060	adenylate cyclase 2	protein-coding
chr5	96524506	96524995	intron (NM_175473, intron 2 of 73)	intron (NM_175473, intron 2 of 73)	150795	NM_175473	231470	Mm.291120	NM_175473	ENSMUSG00000034687	Fras1	E130113P14Rik|bl|mKIAA1500	Fraser extracellular matrix complex subunit 1	protein-coding
chr9	3017915	3018094	Intergenic	GSAT_MM|Satellite|Satellite	20739	NR_039546	100628572		NR_039546	ENSMUSG00000106183	Mir101c	mir-101c|mmu-mir-101c	microRNA 101c	ncRNA
chr18	36490059	36490580	Intergenic	Intergenic	25486	NM_010415	15200	Mm.289681	NM_010415	ENSMUSG00000024486	Hbegf	AW047313|Dtr|Dts|Hegfl	heparin-binding EGF-like growth factor	protein-coding
chr17	82848808	82849339	Intergenic	Intergenic	229152	NR_045094	100503434	Mm.187281	NR_045094	ENSMUSG00000117399	Gm19689	-	predicted gene, 19689	ncRNA
chr11	70802134	70802735	intron (NM_001045526, intron 1 of 4)	intron (NM_001045526, intron 1 of 4)	10127	NM_001045526	327957	Mm.164325	NM_001045526	ENSMUSG00000057135	Scimp	A430084P05Rik	SLP adaptor and CSK interacting membrane protein	protein-coding
chr11	109156343	109157151	Intergenic	Intergenic	-12378	NR_037978	268498	Mm.227970	NM_001085512	ENSMUSG00000078605	E030025P04Rik	Gm664	RIKEN cDNA E030025P04 gene	ncRNA
[truncated: 30,879 more rows]

## Sheet: P8 Smarca5-cKO Aundiff DMRT1
Chr	Start	End	Annotation	Detailed Annotation	Distance to TSS	Nearest PromoterID	Entrez ID	Nearest Unigene	Nearest Refseq	Nearest Ensembl	Gene Name	Gene Alias	Gene Description	Gene Type
[truncated: 18,881 more rows]
