# Supplementary material for: The SMARCA5–DMRT1 Pioneer Complex Establishes Epigenetic Priming to Direct Male Germline Development
Source: Research Square preprint supplement (doi:10.21203/rs.3.rs-7576931/v1), 2025-10-08
Supplement: Supplementary file 1 [file 9fc3865d17a7fbc549d7e809.pdf]

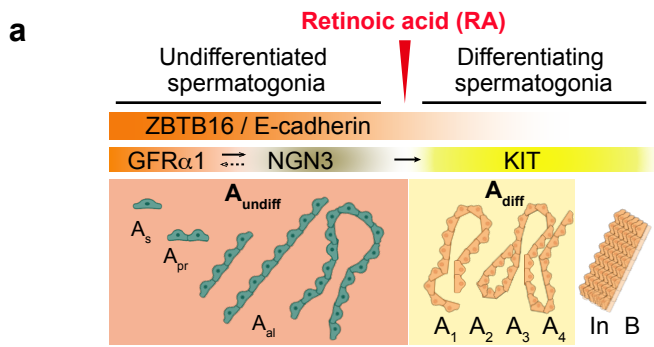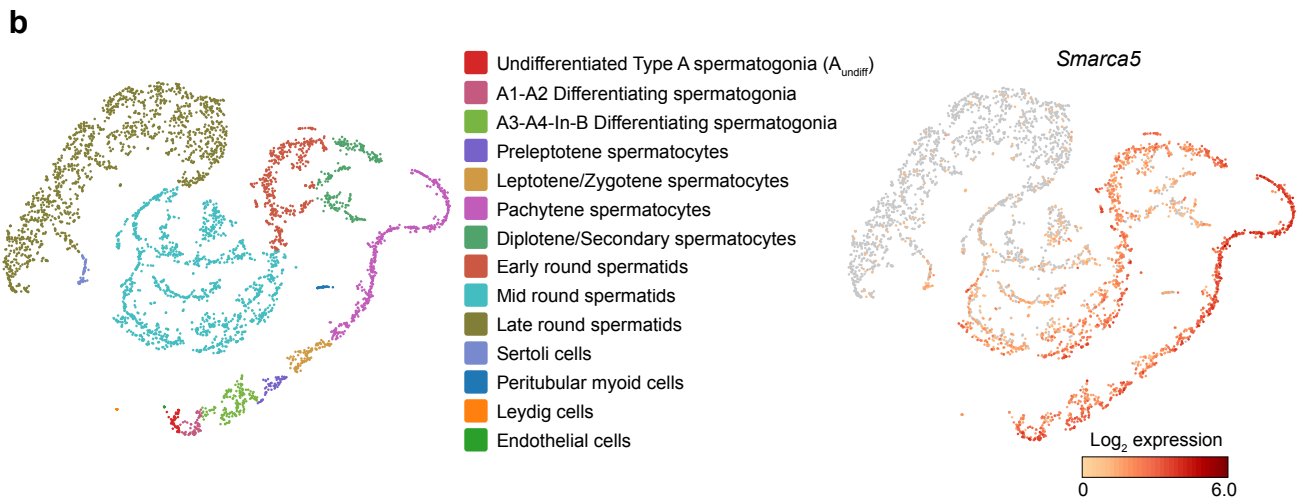

**c** 2m *Smarca5*-ctrl

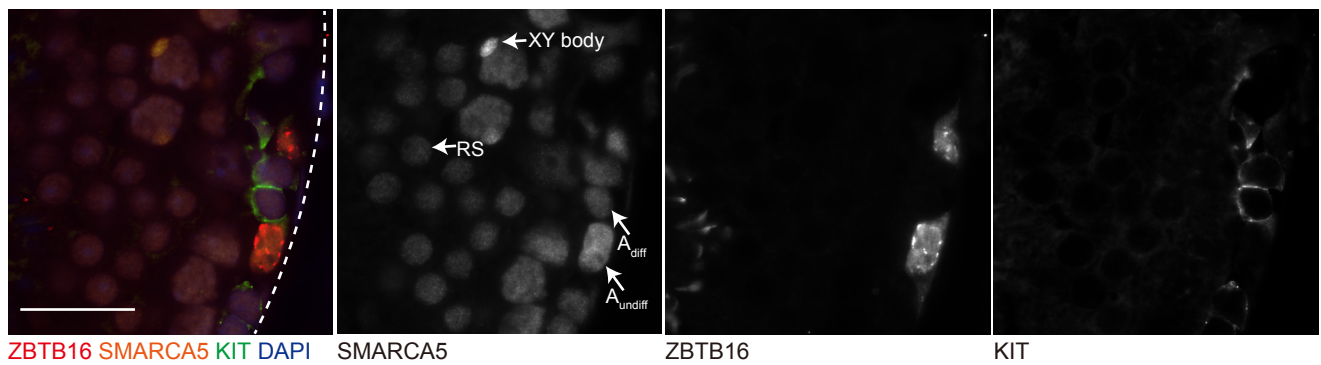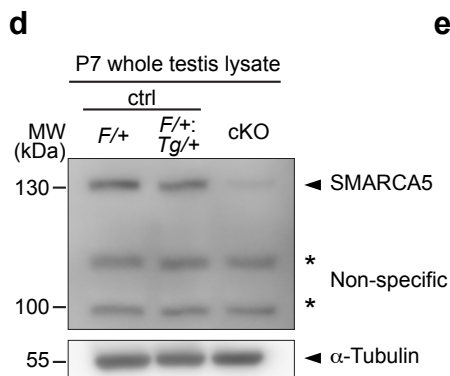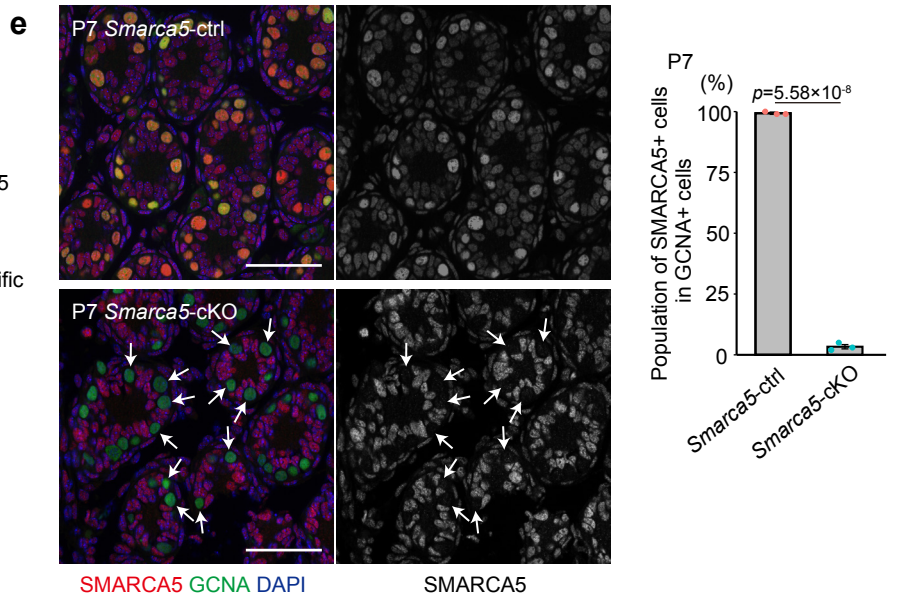

### Extended Data Figure 1. SMARCA5 expression during spermatogenesis and its deletion in the germline

- a.** Schematic representation of the spermatogonial hierarchy and marker gene expression (created with BioRender.com). Spermatogonia are classified as type A, intermediate (In), or type B. Type A includes undifferentiated spermatogonia ( $A_{undiff}$ , including  $A_{single}$  ( $A_s$ ),  $A_{paired}$  ( $A_{pr}$ ) and  $A_{aligned}$  ( $A_{al}$ )), and early differentiating spermatogonia ( $A_{diff}$ , including  $A_1$ ,  $A_2$ ,  $A_3$  and  $A_4$ ), while In and type B represent later stages of differentiating spermatogonia.
- b.** t-SNE plot of single-cell RNA-seq data from adult testis,<sup>35</sup> showing identification of cell clusters (left) and *Smarca5* expression across clusters (right).
- c.** Immunostaining of SMARCA5, ZBTB16, and KIT in 2-month-old *Smarca5*-ctrl testes. In the SMARCA5-stained panel, representative  $A_{undiff}$ ,  $A_{diff}$ , XY body, and round spermatid (RS) are indicated by arrows. Scale bar, 25  $\mu$ m.
- d.** Western blot analysis of testicular lysate obtained from *Smarca5*<sup>F/+</sup>, *Smarca5*<sup>F/F</sup>, *Ddx4*-Cre<sup>+</sup> (*Smarca5*-ctrl) and *Smarca5*<sup>F/F</sup>; *Ddx4*-Cre<sup>+</sup> (*Smarca5*-cKO) at P7. Asterisks indicate the positions of non-specific bands.
- e.** Testis sections of *Smarca5*-cKO and control littermates at P7 stained with DAPI and antibodies against SMARCA5 and GCNA (germ cell marker). Scale bar, 100  $\mu$ m. The graph shows the percentage of SMARCA5<sup>+</sup> cell in GCNA<sup>+</sup> cells. Error bars represent mean  $\pm$  s.d. 100 GCNA<sup>+</sup> cells for each samples were counted. Independent values obtained from individual mice are shown as dots. SMARCA5<sup>+</sup>GCNA<sup>+</sup> cells are shown with arrows. Statistical significance was assessed using a two-tailed unpaired Student's t-test assuming equal variances (n = 3 per group).

**a**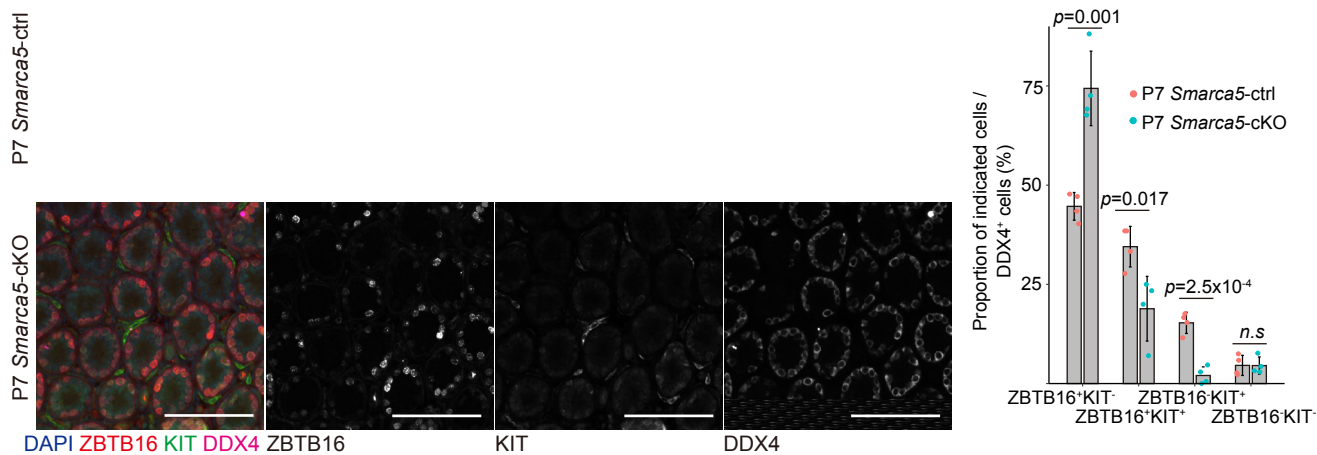**b**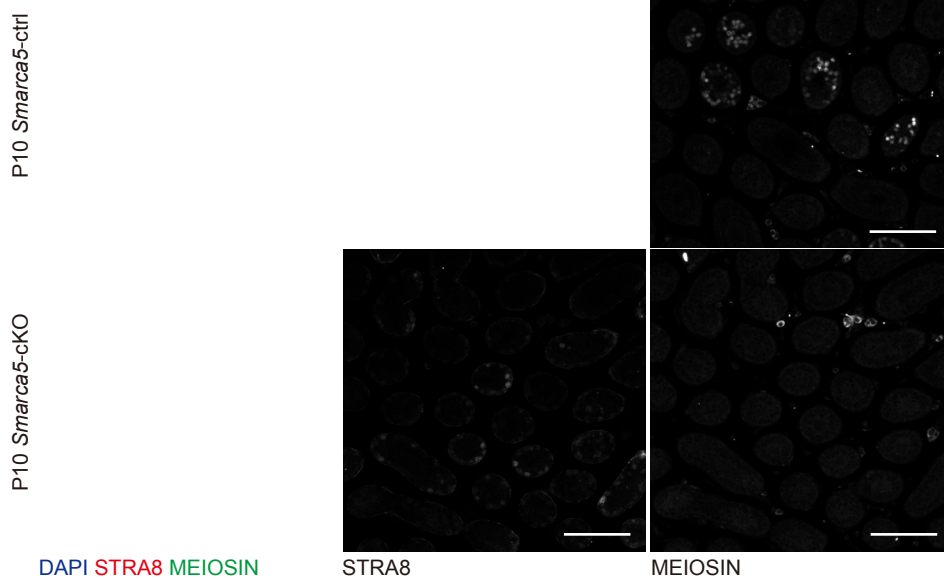**c**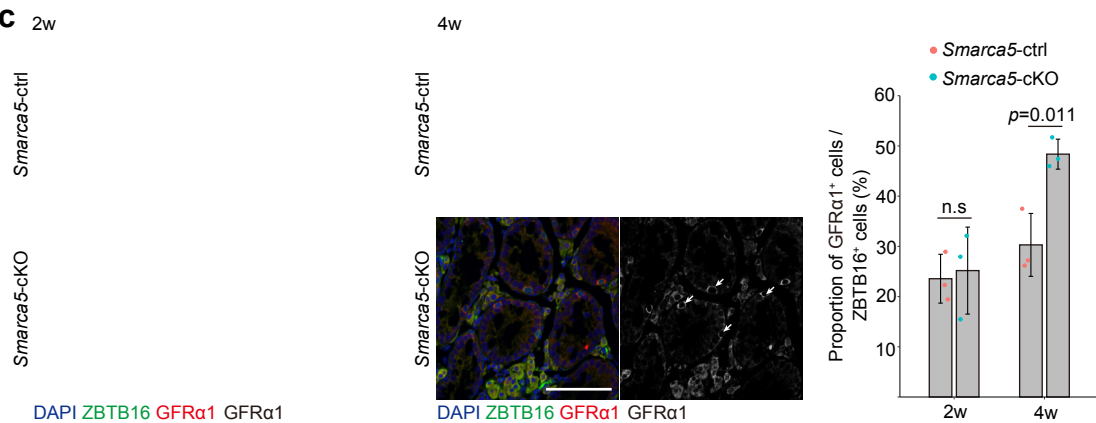**d**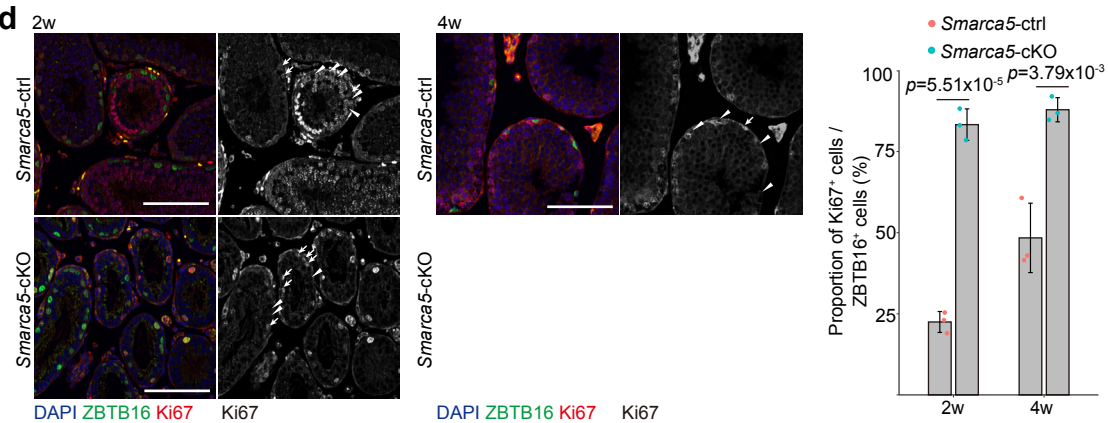

**Extended Data Figure 2. Immunohistochemical analysis of *Smarca5*-cKO testis sections.**

**a.** Testis sections from *Smarca5*-cKO and control littermates at P7 stained with DAPI and antibodies against ZBTB16, KIT, and DDX4. Scale bars, 100  $\mu$ m. The graph shows the percentage of ZBTB16<sup>+</sup> and/or KIT<sup>+</sup> cells among DDX4<sup>+</sup> germ cells. Error bars represent mean  $\pm$  s.d. At least 180 DDX4<sup>+</sup> germ cells were counted per sample. Data points represent values from individual mice. Statistical significance was assessed using a two-tailed unpaired Student's t-test assuming equal variances (n = 4 per group).

**b.** Testis sections from *Smarca5*-cKO and control littermates at P10 stained with DAPI and antibodies against STRA8 and MEIOSIN (a marker of preleptotene spermatocytes). Scale bars, 100  $\mu$ m.

**c, d.** Testis sections from *Smarca5*-cKO and control littermates at 2 and 4 weeks of age stained with DAPI and antibodies against ZBTB16 and Ki67 (**c**) or GFR $\alpha$ 1 (**d**). Scale bars, 100  $\mu$ m. Graphs show the percentage of Ki67<sup>+</sup> (**c**) or GFR $\alpha$ 1<sup>+</sup> (**d**) cells among ZBTB16<sup>+</sup> cells. Error bars represent mean  $\pm$  s.d. At least 120 ZBTB16<sup>+</sup> cells were counted per sample. Data points represent individual mice. Statistical significance was determined using a two-tailed unpaired Student's t-test assuming equal variances (n = 3 per group). Ki67<sup>+</sup> and GFR $\alpha$ 1<sup>+</sup> cells are indicated by arrows; negative cells are indicated by arrowheads.

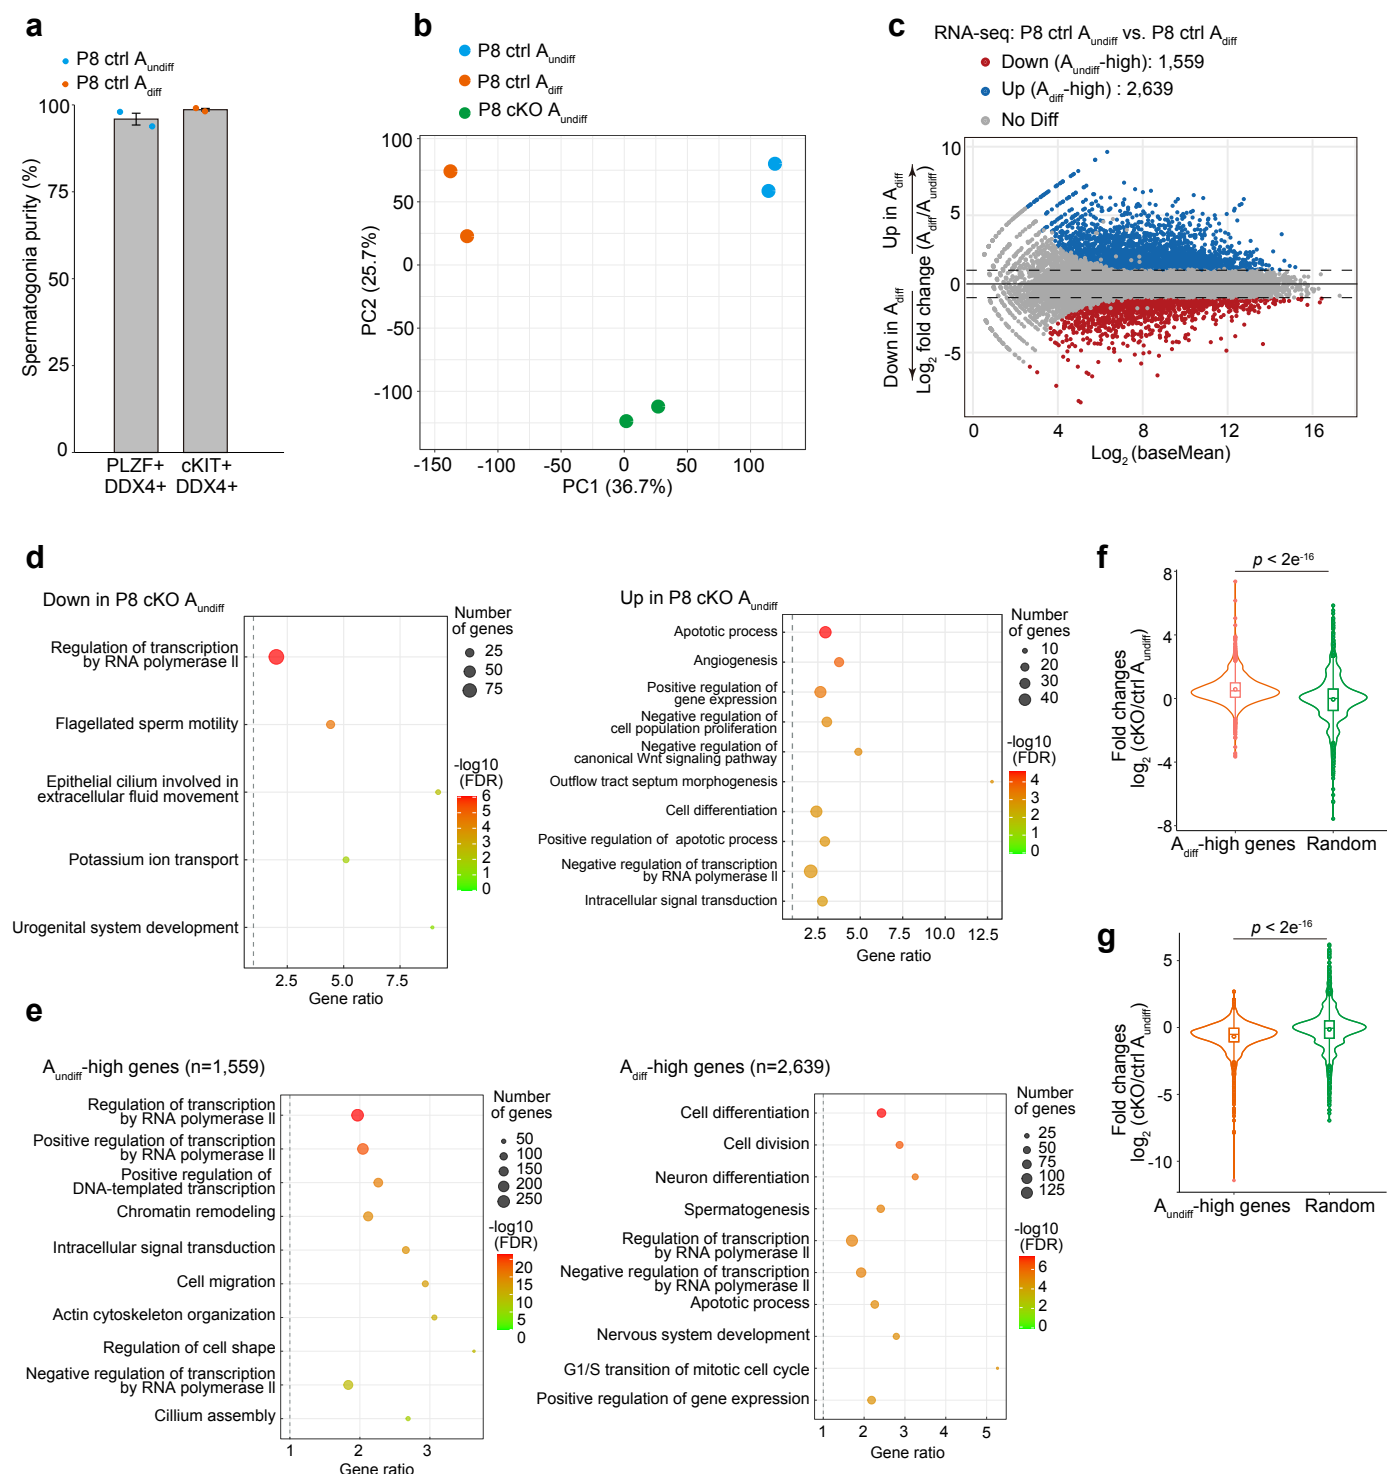

### Extended Data Figure 3. RNA-seq analysis of $A_{undiff}$ and $A_{diff}$

**a.** Quantification of the purity of isolated spermatogonia. Purity values from two independent experiments are shown as individual dots.

**b.** Principal component analysis (PCA) plot showing biological replicates of RNA-seq samples.

**c.** Transcriptomic comparison between  $A_{undiff}$  and  $A_{diff}$  populations. Differentially expressed genes (DEGs) are defined as those with  $\log_2$  fold change  $> 2$ ,  $Padj < 0.05$ , based on a binomial test with Benjamini-Hochberg correction.

**d.** Gene Ontology (GO) analysis of genes downregulated (left) and upregulated (right) in *Smarca5*-cKO  $A_{undiff}$  compared to *Smarca5*-ctrl  $A_{undiff}$ .

**e.** GO analysis of genes downregulated ( $A_{undiff}$ -high genes: left) and upregulated ( $A_{diff}$ -high genes: right) in *Smarca5*-ctrl  $A_{undiff}$  compared to ctrl  $A_{undiff}$ .

**f, g.** Violin plots showing  $\log_2$  fold change in *Smarca5*-cKO  $A_{undiff}$  compared to ctrl  $A_{undiff}$  within gene groups highly expressed in  $A_{diff}$  ( $A_{diff}$ -high genes: n = 2,639; **f**) or  $A_{undiff}$  ( $A_{undiff}$ -high genes: n = 1,559; **g**). For comparison,  $\log_2$  fold change values from randomly selected genes are also shown. Box plots indicate the 25th, median, and 75th percentiles; dots within the box represent the mean. Statistical significance was based on Levene's test and Wilcoxon rank sum test.

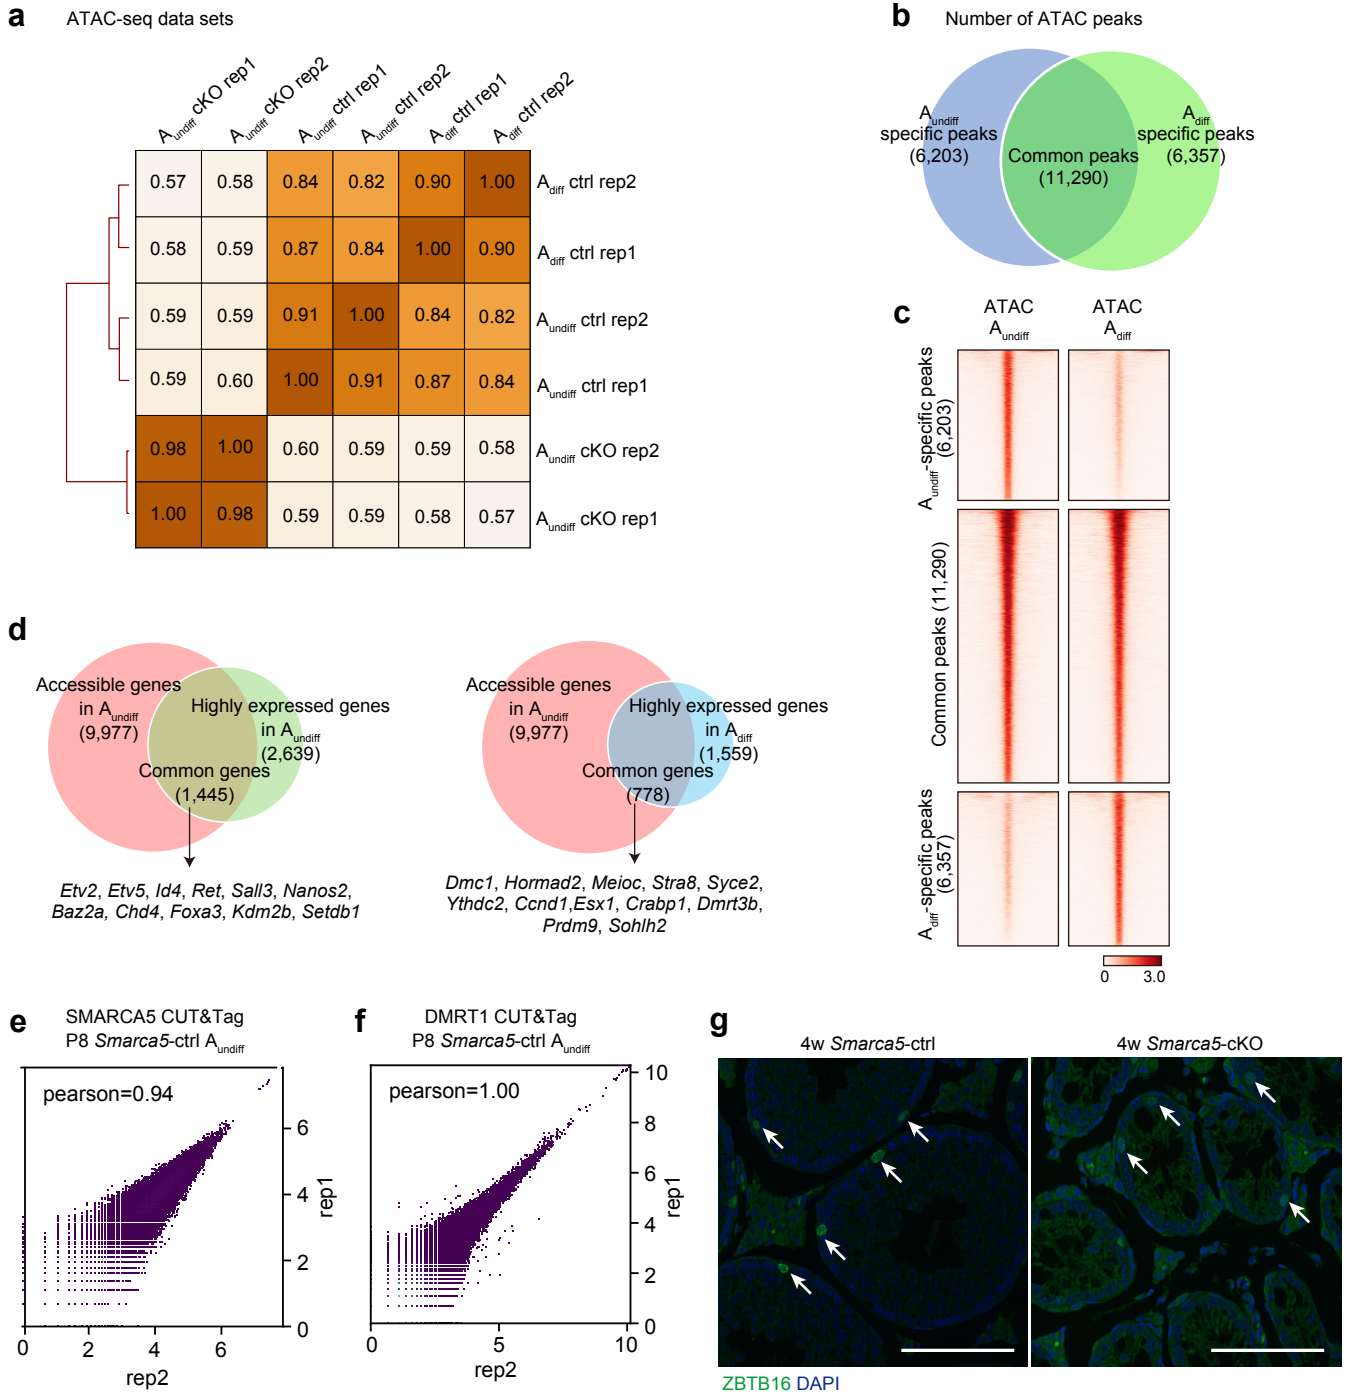

#### Extended Data Figure 4. ATAC-seq and CUT&Tag analysis of $A_{undiff}$ and $A_{diff}$

- a.** Heatmap showing Pearson correlation coefficients among each cell type based on ATAC-seq profiles. Two biological replicates were merged for downstream analysis.
- b.** Venn diagram showing the overlap of ATAC-seq peaks between  $A_{undiff}$  and  $A_{diff}$ .
- c.** Heatmaps showing ATAC-seq enrichment in  $A_{undiff}$  and  $A_{diff}$  at  $A_{undiff}$ -specific, common, or  $A_{diff}$ -specific peaks.
- d.** Venn diagrams showing the overlap between accessible genes in  $A_{undiff}$  ( $n = 9,977$ ) and genes highly expressed in  $A_{undiff}$  compared to  $A_{undiff}$  (left), or highly expressed in  $A_{diff}$  compared to  $A_{undiff}$  (right). Genes located within  $\pm 10$  kb of ATAC-seq peaks in  $A_{undiff}$  were defined as accessible.
- e, f.** Scatter plots showing Pearson correlation between two biological replicates for SMARCA5 CUT&Tag (**e**) and DMRT1 CUT&Tag (**f**) in P8 *Smarca5*-ctrl  $A_{undiff}$ . Two replicates were merged for downstream analysis.
- g.** Testis sections from *Smarca5*-cKO and control littermates at 4 weeks stained with DAPI and antibodies against ZBTB16. Arrows indicate ZBTB16<sup>+</sup> cells. Scale bars, 100  $\mu$ m.



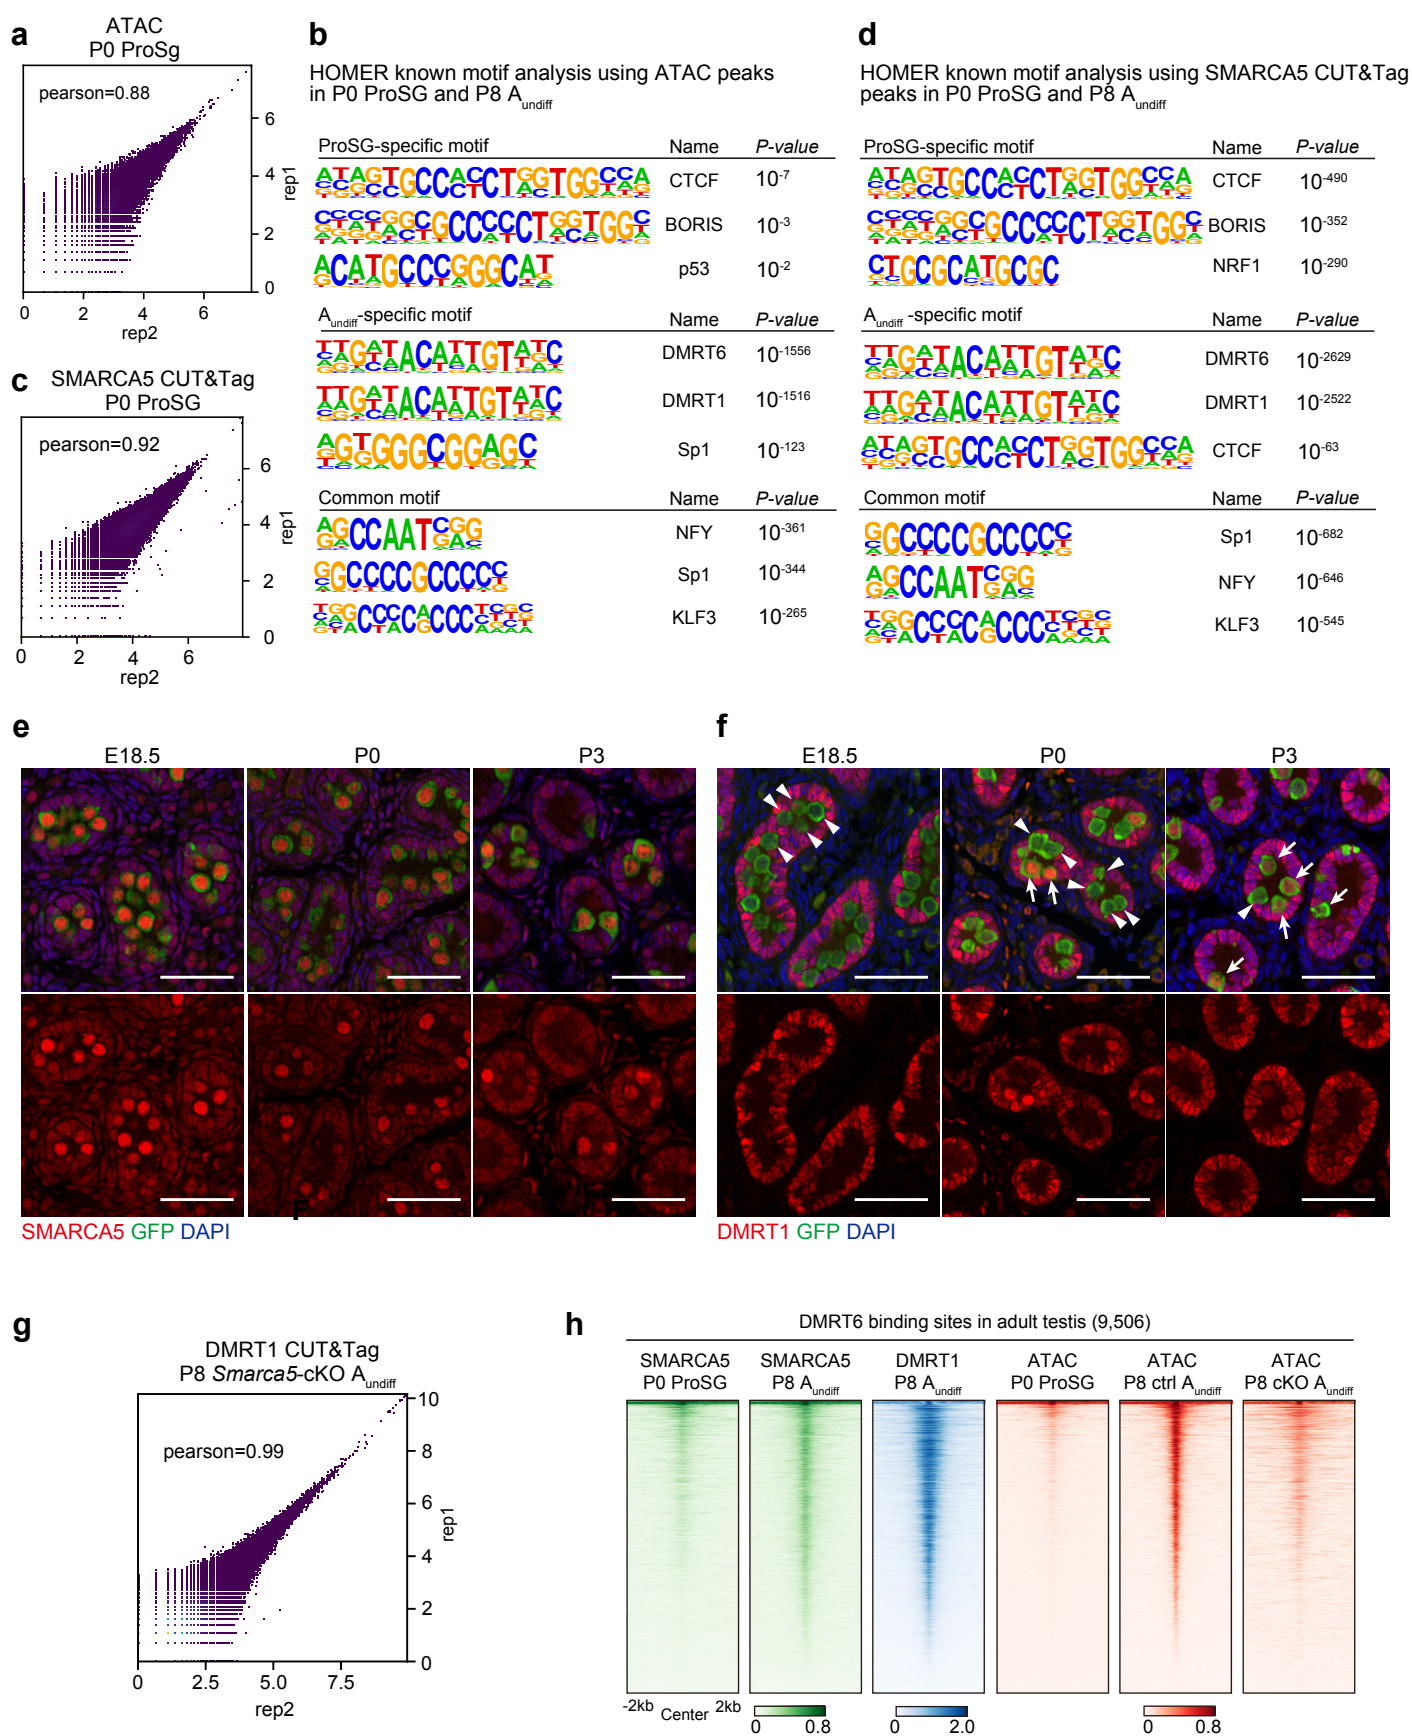

**Extended Data Figure 5. ATAC-seq and CUT&Tag analysis of ProSG and A<sub>undiff</sub>**

**a, c.** Scatter plot showing Pearson correlation between two biological replicates of ATAC-seq (**a**) and SMARCA5 CUT&Tag (**c**) in P0 ProSG. Replicates were merged for downstream analysis.

**b, d.** HOMER known motif analysis of ATAC-seq peaks (**b**) and SMARCA5 CUT&Tag peaks (**d**) at ProSG-specific, A<sub>undiff</sub>-specific, and common sites.

**e, f.** Testis sections from *Stalla*-GFP mice stained with DAPI and antibodies against GFP and SMARCA5 (**e**) or DMRT1 (**f**) at E18.5, P0, and P3. DMRT1<sup>+</sup> germ cells are indicated by arrows; DMRT1<sup>-</sup> cells are indicated by arrowheads. Scale bars, 100  $\mu$ m.

**g.** Scatter plot showing Pearson correlation between two biological replicates of DMRT1 CUT&Tag in P8 *Smarca5*-cKO A<sub>undiff</sub>.

**h.** Heatmap showing SMARCA5, DMRT1, and ATAC enrichment in ProSG and A<sub>undiff</sub> at DMRT6-binding sites identified in the adult testis (n = 9,506).
