# Supplementary material for: The SMARCA5–DMRT1 Pioneer Complex Establishes Epigenetic Priming to Direct Male Germline Development
Source: Research Square preprint supplement (doi:10.21203/rs.3.rs-7576931/v1), 2025-10-08
Supplement: Supplementary file 2 [file 2af944e038108dba0cb64d8d.xlsx]

## Sheet: U_vs_D
Supplementary Table 1: Gene expression changes from Aundiff to Adiff at P8.
Geneid	baseMean	log2FC (Diff/Undiff)	pvalue	padj (Diff/Undiff)	Undiff_C_Ave_TPM	Diff_C_Ave_TPM	Undiff_Ctrl_1_TPM	Undiff_Ctrl_2_TPM	Diff_Ctrl_1_TPM	Diff_Ctrl_2_TPM
Tnfsf4	79.1798	-9.62011	2.15427e-10	1.97741e-09	8.16711	0	8.29306	8.04116	0	0
Ankrd63	53.295	-9.04936	8.02615e-09	6.16547e-08	1.82359	0	2.51753	1.12965	0	0
Spata19	52.8422	-9.0368	5.63994e-09	4.42356e-08	10.288	0	11.5811	8.99493	0	0
Gm41876	30.1487	-8.22684	4.31104e-07	2.64824e-06	7.87065	0	6.5014	9.2399	0	0
Gm9866	26.0301	-8.01512	1.17727e-06	6.83682e-06	2.06965	0	2.04879	2.09051	0	0
Fbxw27	24.9045	-7.95136	1.62305e-06	9.23432e-06	2.63404	0	2.63122	2.63686	0	0
Gm40997	23.3229	-7.85674	2.60685e-06	1.43959e-05	14.9461	0	15.3704	14.5217	0	0
Cbs	17.8506	-7.47134	2.01262e-05	9.65874e-05	1.0798	0	1.44814	0.711451	0	0
Hsd17b14	17.7527	-7.46287	1.77918e-05	8.62977e-05	1.80963	0	1.6312	1.98805	0	0
4833407H14Rik	17.5319	-7.44479	1.94509e-05	9.356e-05	2.39489	0	2.12541	2.66438	0	0
Foxl1	138.056	-7.37972	5.34426e-16	8.02924e-15	7.68426	0.0441793	6.55023	8.81829	0	0.0883585
Gm33714	16.6054	-7.36659	2.73992e-05	0.000128844	2.99832	0	2.9681	3.02854	0	0
LOC115486424	16.1783	-7.32889	3.3018e-05	0.000152902	2.7464	0	2.49007	3.00273	0	0
Irx1	14.6545	-7.18593	7.02208e-05	0.000309305	1.17724	0	0.822303	1.53217	0	0
Lta	39.5703	-7.16321	4.37705e-06	2.33571e-05	1.1311	0.00756512	1.10032	1.16189	0	0.0151302
Gm36126	14.3831	-7.1592	7.0995e-05	0.000312556	1.62711	0	1.45833	1.79589	0	0
Gm4889	13.8837	-7.1085	8.88425e-05	0.000383966	5.20457	0	5.82448	4.58465	0	0
Havcr1	36.8125	-7.05803	6.93465e-06	3.58437e-05	2.41394	0.0173528	2.61194	2.21594	0	0.0347056
Slc36a2	36.0926	-7.03828	9.01954e-06	4.57948e-05	2.39961	0.0154179	1.72831	3.07092	0.0308357	0
Iqub	198.404	-6.90402	4.52938e-25	1.26636e-23	8.16917	0.0626621	9.41789	6.92045	0.0381438	0.0871804
Kcnj15	333.582	-6.78781	1.42535e-39	8.4722e-38	4.65943	0.0370618	3.72931	5.58955	0.0518875	0.0222361
4930544G11Rik	10.8289	-6.74942	0.000441112	0.00168196	1.24192	0	0.816856	1.66698	0	0
Gm32255	255.931	-6.68652	5.71492e-34	2.59099e-32	8.25809	0.0727664	7.96282	8.55336	0.0599274	0.0856053
Gm42210	10.3223	-6.6807	0.000517329	0.00194689	1.85373	0	1.83505	1.87242	0	0
1700084M14Rik	27.6634	-6.65226	3.85826e-05	0.00017655	8.13198	0.0682358	7.51719	8.74678	0.136472	0
Uba7	27.6632	-6.64008	5.75454e-05	0.000257708	1.44098	0.0137856	2.16827	0.713684	0	0.0275713
4930452G13Rik	9.90238	-6.62056	0.000674494	0.00248814	1.5198	0	1.22869	1.81091	0	0
Gm30257	9.37412	-6.5421	0.000954731	0.00340616	1.42734	0	1.89029	0.964388	0	0
Pla2g4e	49.7037	-6.54051	0.00136116	0.00469603	1.54796	0.0143993	2.75515	0.340758	0.0287986	0
Prodh2	51.3123	-6.53781	2.04391e-08	1.49083e-07	3.5336	0.0342988	3.27925	3.78795	0.0320133	0.0365843
Gm19696	25.3472	-6.52541	6.41432e-05	0.000284886	3.70633	0.0339358	4.06647	3.34619	0.0678715	0
Tmem211	25.3389	-6.51115	7.84493e-05	0.000343153	1.07624	0.0113104	0.688626	1.46385	0	0.0226208
Gm10007	9.01202	-6.48455	0.00114854	0.00402677	3.3182	0	2.45737	4.17902	0	0
Foxc2	1350.55	-6.47177	1.48941e-135	1.01289e-132	81.253	0.827837	69.2303	93.2756	0.727882	0.927792
Myoz1	8.78401	-6.4476	0.00130292	0.00450854	1.12487	0	0.854574	1.39516	0	0
Gpr142	8.27019	-6.36123	0.00176226	0.00594324	1.20451	0	1.48605	0.922973	0	0
Gm31294	22.2345	-6.33471	0.000132962	0.000556513	2.83861	0.0296839	2.9259	2.75132	0.0593678	0
Ly6a	8.05663	-6.32339	0.00197148	0.00657407	1.33557	0	1.54506	1.12608	0	0
Gm18962	21.995	-6.30472	0.000148151	0.000614339	4.04204	0.048868	4.71089	3.3732	0	0.0977359
Gbp2	87.2602	-6.29412	8.47232e-14	1.06177e-12	5.82274	0.0688043	5.91572	5.72976	0.0310744	0.106534
Vsx2	64.7917	-6.29093	1.06739e-10	1.00367e-09	3.25532	0.0367611	3.11976	3.39089	0.0467879	0.0267343
Cbln2	1843.33	-6.25758	2.53733e-202	3.91121e-199	95.1309	1.12068	100.516	89.7455	1.03319	1.20817
Gm11723	20.5116	-6.21707	0.000216643	0.000870866	1.5464	0.0175697	1.25642	1.83638	0.0351394	0
Kcnc2	806.018	-6.18663	3.27319e-105	1.37605e-102	8.54393	0.105154	8.40237	8.68549	0.108686	0.101622
Gfra1	6938.05	-6.18216	0	0	202.45	2.51556	192.848	212.052	2.21735	2.81378
Ly6g6e	139.36	-6.16513	4.61508e-21	1.01051e-19	4.83808	0.0612107	5.56269	4.11347	0.0485084	0.073913
1700020N15Rik	7.14459	-6.15024	0.0036617	0.0115569	2.17545	0	2.83543	1.51547	0	0
Fam217a	38.9163	-6.13384	3.55544e-07	2.21111e-06	2.2944	0.0294537	2.28469	2.30411	0.027491	0.0314164
Gm36335	6.98883	-6.1177	0.00406618	0.0126709	3.29826	0	2.31035	4.28617	0	0
Gm30717	6.96716	-6.11345	0.00394908	0.012361	1.43533	0	1.28211	1.58855	0	0
Gm11729	6.54004	-6.02192	0.00551173	0.0166309	1.51924	0	1.03396	2.00452	0	0
Gm19663	54.5806	-6.01851	2.26499e-09	1.85187e-08	3.51798	0.0515657	4.06978	2.96618	0	0.103131
8430426J06Rik	18.0209	-6.01147	0.000421344	0.00161484	2.40164	0.0355838	2.34704	2.45624	0	0.0711677
Gprc5c	746.8	-5.99945	6.76801e-99	2.52403e-96	23.7688	0.336576	22.8691	24.6686	0.282437	0.390715
Gm33104	35.4341	-5.97943	1.34654e-06	7.74494e-06	4.9683	0.0747688	6.25935	3.67725	0	0.149538
Ccl1	6.3337	-5.97546	0.00685426	0.0202019	2.07497	0	1.02188	3.12806	0	0
Gm48277	17.5071	-5.96897	0.000511278	0.00192725	3.23618	0.0493102	3.91957	2.55279	0	0.0986204
Caly	133.157	-5.90502	5.30078e-21	1.14976e-19	12.1992	0.183363	13.8512	10.5472	0.171144	0.195581
Nt5c1b	16.1577	-5.86931	0.00072941	0.00267281	1.22751	0.0177331	1.37092	1.0841	0.0354661	0
Scn10a	48.1574	-5.85752	7.98094e-09	6.13686e-08	1.01487	0.0154841	0.999836	1.02991	0.0197075	0.0112607
Nanos2	319.325	-5.84568	9.35673e-48	7.72665e-46	36.1969	0.564207	36.2202	36.1736	0.583157	0.545256
Arhgap33os	46.8298	-5.82913	1.7091e-08	1.25973e-07	2.88481	0.0432143	2.64483	3.12479	0.0864286	0
Etv5	6446.81	-5.82674	0	0	213.594	3.39519	193.692	233.496	2.96217	3.82821
Ccdc162	219.13	-5.826	4.99094e-33	2.17327e-31	3.73799	0.0575502	3.70032	3.77567	0.0877511	0.0273493
Snord72	5.59187	-5.79658	0.0103225	0.0290645	15.4837	0	18.4303	12.537	0	0
Gm15217	5.56297	-5.78949	0.0115376	0.0320371	1.36985	0	2.07205	0.667653	0	0
Gm36028	210.931	-5.76718	1.87756e-32	7.96566e-31	7.68668	0.124229	7.95873	7.41462	0.170513	0.0779441
Fendrr	134.643	-5.76417	4.78788e-21	1.04242e-19	6.60377	0.104948	6.16747	7.04006	0.18366	0.0262355
Gm16702	104.413	-5.75789	4.46117e-17	7.24886e-16	7.13902	0.114284	6.95775	7.32029	0.191999	0.036569
Cd93	388.766	-5.75052	6.47816e-57	7.41525e-55	9.53977	0.158429	9.08466	9.99489	0.172388	0.144469
Ret	6045.74	-5.74792	0	0	134.138	2.24608	129.185	139.091	2.14075	2.35141
1700028P14Rik	5.36386	-5.73659	0.0122687	0.0338081	1.02697	0	1.27398	0.779955	0	0
Oit1	58.8159	-5.71317	1.65909e-10	1.53569e-09	3.50861	0.0619188	3.40501	3.61221	0.0279647	0.0958729
Gm36587	58.7581	-5.7118	1.67648e-10	1.55117e-09	1.51545	0.0267608	1.56506	1.46583	0.0120861	0.0414356
Gm41433	14.673	-5.7078	0.00120379	0.00420072	3.05032	0.055742	2.73391	3.36673	0	0.111484
Kcnh3	217.404	-5.70276	3.84424e-33	1.69631e-31	7.75236	0.133746	6.86643	8.63828	0.13375	0.133742
Foxf1	677.583	-5.69399	2.32781e-94	7.68911e-92	45.484	0.790939	44.7799	46.188	0.755011	0.826866
Tril	232.243	-5.68847	2.93367e-29	1.04037e-27	7.04023	0.126103	4.87072	9.20975	0.0569523	0.195253
Gm40554	5.14308	-5.6759	0.0143541	0.0387754	2.29102	0	2.76702	1.81502	0	0
1110036E04Rik	4.95119	-5.62055	0.0165521	0.0439754	1.05623	0	0.853914	1.25855	0	0
Kirrel2	205.924	-5.62031	1.72321e-32	7.32427e-31	10.7289	0.197222	11.1456	10.3123	0.171048	0.223396
Gm38826	157.657	-5.56424	2.21938e-25	6.37471e-24	11.6798	0.218456	12.3932	10.9663	0.278041	0.158871
Gm8364	65.7409	-5.55403	9.08216e-12	9.5977e-11	9.62326	0.186539	9.96233	9.28419	0.137455	0.235623
Gm4798	88.281	-5.5059	3.42457e-15	4.80478e-14	4.56614	0.088503	4.46084	4.67145	0.121477	0.0555289
Lrrc18	37.7297	-5.48553	2.60982e-07	1.6501e-06	2.03116	0.0415256	2.46715	1.59517	0.0252775	0.0577736
Tcl1	5155.6	-5.48308	8.57611e-287	3.30495e-283	509.428	10.2876	531.17	487.686	8.26488	12.3103
Nxph4	86.3194	-5.44381	1.8995e-13	2.31647e-12	8.3388	0.178916	5.80967	10.8679	0.0455448	0.312288
Nme8	24.269	-5.43996	2.9368e-05	0.000137348	1.38692	0.0287695	1.60884	1.16501	0.0268524	0.0306865
Akr1c12	48.1152	-5.43799	4.94929e-09	3.90705e-08	6.34608	0.128368	6.88704	5.80513	0.185916	0.0708208
Rfx8	157.625	-5.42937	4.01677e-25	1.1244e-23	10.2456	0.218392	10.8735	9.6176	0.122305	0.314478
Gm41875	12.1577	-5.42905	0.00290834	0.00937235	1.80648	0.0399544	2.02716	1.5858	0	0.0799087
Gm15762	35.5221	-5.41087	6.67433e-07	3.99595e-06	3.44361	0.0717831	2.42794	4.45929	0.0913624	0.0522038
Irs2	83.2541	-5.3914	1.39562e-13	1.71829e-12	1.98234	0.0441103	1.58424	2.38045	0.0112287	0.0769918
Dusp6	5054.24	-5.34584	2.57424e-276	8.50307e-273	292.5	6.48922	266.656	318.343	5.59133	7.38711
Ube2ql1	22.3368	-5.34058	6.99951e-05	0.000308448	1.34881	0.0284443	1.12698	1.57064	0.0568886	0
Gm7967	67.4938	-5.32784	4.08013e-12	4.46267e-11	16.9266	0.37957	18.7156	15.1376	0.354277	0.404863
Lhx1	1312.78	-5.32283	6.29702e-147	5.19999e-144	51.1352	1.1517	46.5328	55.7377	1.06516	1.23824
Cdkn1b	121.29	-5.32025	7.20443e-19	1.34556e-17	8.1664	0.176727	7.38745	8.94535	0.317204	0.0362497
Slc9a4	65.8043	-5.30749	3.90556e-11	3.85751e-10	2.61885	0.057669	1.90518	3.33252	0.0938809	0.0214572
Gm39575	43.5665	-5.30536	4.3688e-08	3.05274e-07	18.254	0.394251	20.7639	15.7442	0.788502	0
Fam163a	258.707	-5.28707	6.8776e-10	5.98509e-09	9.69956	0.225826	11.2656	8.13355	0.0883163	0.363336
Spry4	1230.49	-5.24071	3.90582e-145	3.01035e-142	42.4249	1.01027	39.5109	45.3388	0.960309	1.06023
Cd109	789.959	-5.22214	9.34162e-21	1.99259e-19	21.7618	0.52752	22.2659	21.2576	0.312068	0.742973
Gm12602	10.3884	-5.22094	0.0056812	0.0170909	1.11635	0.0253616	0.882302	1.3504	0.0507231	0
Glipr1l3	10.309	-5.21033	0.00595495	0.0178355	1.65583	0.0378036	2.11885	1.19282	0.0756071	0
Tmc8	350.583	-5.20012	5.58886e-50	5.10773e-48	14.9757	0.366243	13.0119	16.9394	0.36337	0.369115
Zdhhc14	153.027	-5.19183	1.00094e-24	2.7552e-23	2.52999	0.0612998	2.74438	2.3156	0.0780196	0.0445799
Nanos3	1071.84	-5.18242	6.73089e-135	4.44662e-132	237.165	5.88932	247.118	227.213	5.32968	6.44896
Dbx2	142.008	-5.1818	1.92589e-23	4.92593e-22	10.1004	0.247136	9.96584	10.235	0.302329	0.191943
Klk13	152.116	-5.15587	7.60343e-23	1.87028e-21	10.9137	0.283718	9.84262	11.9847	0.101853	0.465583
Tlr3	271.258	-5.14924	8.63e-10	7.42347e-09	8.62913	0.215772	9.03361	8.22466	0.345669	0.0858751
H2-Aa	167.811	-5.12245	1.84576e-20	3.84831e-19	6.01098	0.156924	8.65579	3.36617	0.101401	0.212447
Gm35500	9.8848	-5.12011	0.00745404	0.0217589	1.23111	0.0336344	1.64963	0.812586	0	0.0672688
Txk	29.3688	-5.11313	4.10448e-06	2.20041e-05	1.78041	0.0471498	1.6364	1.92442	0.0287011	0.0655985
Nid1	1807.71	-5.1105	1.52476e-159	1.46898e-156	48.1921	1.26354	44.6766	51.7075	0.984193	1.54289
Tnfrsf26	153.393	-5.10482	3.46081e-24	9.20839e-23	8.31	0.212323	7.75101	8.869	0.307508	0.117139
Mpzl2	954.673	-5.10127	3.15978e-124	1.73953e-121	47.8605	1.25211	46.6488	49.0723	1.25723	1.24698
Ptpn13	3970.05	-5.0972	1.40844e-244	3.25659e-241	77.2424	2.03496	70.1073	84.3776	1.79619	2.27372
Fev	38.522	-5.0688	3.6326e-07	2.25606e-06	3.91841	0.110076	4.60758	3.22924	0	0.220153
n-TSgct6	19.1939	-5.06551	0.000227303	0.000911259	37.6762	1.06318	38.6587	36.6938	0	2.12635
Tmem132e	564.492	-5.05789	1.49547e-76	3.08734e-74	15.0094	0.408488	14.1818	15.8369	0.327523	0.489454
L1cam	45.594	-5.04556	3.23259e-08	2.30691e-07	1.38753	0.0360255	1.18366	1.5914	0.072051	0
Id4	241.082	-5.03878	9.33683e-38	5.00896e-36	9.79678	0.26949	10.0081	9.58548	0.231	0.30798
Dgkg	137.677	-5.03527	1.3062e-22	3.14933e-21	1.31314	0.0354815	1.35721	1.26907	0.0451593	0.0258037
Gm31160	27.2343	-5.01864	8.99605e-06	4.56957e-05	1.61642	0.0441539	1.79212	1.44072	0.0561971	0.0321107
Gm36899	27.5231	-5.01642	8.0856e-06	4.13984e-05	3.28088	0.0928328	3.38572	3.17605	0.0565093	0.129156
Zfp385c	128.212	-5.01434	8.54622e-21	1.82799e-19	3.33478	0.0941892	3.68011	2.98945	0.0616216	0.126757
Plvap	2684.28	-5.00328	4.89219e-255	1.25686e-251	203.356	5.70292	199.991	206.72	5.49529	5.91054
T	208.734	-4.99338	2.32202e-30	8.74426e-29	16.4015	0.474045	15.854	16.9489	0.223717	0.724373
Lncenc1	312.097	-4.9893	2.78332e-44	2.02377e-42	14.1827	0.398217	16.2669	12.0984	0.452043	0.344392
Fgd5	908.62	-4.96922	1.51306e-91	4.5435e-89	23.7378	0.689307	21.3252	26.1504	0.471371	0.907243
Aspg	296.786	-4.94729	1.0234e-43	7.25864e-42	11.734	0.344325	12.8699	10.5981	0.281366	0.407285
Slc15a1	34.6182	-4.93866	7.65595e-07	4.56005e-06	1.7839	0.0523433	2.21895	1.34885	0.0488553	0.0558312
Car6	418.158	-4.92046	1.61226e-61	2.14245e-59	24.5159	0.725864	24.2688	24.763	0.751739	0.699989
9230117E06Rik	24.9657	-4.90989	3.11757e-05	0.000145068	8.01791	0.228406	8.82889	7.20693	0.456812	0
Vsx1	305.673	-4.90804	1.63874e-45	1.25884e-43	13.7632	0.413862	14.8558	12.6706	0.363478	0.464246
Gm15222	16.9326	-4.90557	0.000436832	0.00166674	1.50615	0.045282	1.47034	1.54195	0.0422646	0.0482994
Ypel4	33.7712	-4.90164	8.73698e-07	5.15773e-06	1.61483	0.0486367	1.86442	1.36524	0.0453958	0.0518777
Gm40612	50.5624	-4.89864	1.65951e-09	1.38175e-08	4.89296	0.147801	4.84365	4.94227	0.137952	0.15765
Fbxw13	25.6947	-4.89267	2.96319e-05	0.00013847	2.77748	0.088061	3.32614	2.22881	0	0.176122
Barhl2	995.583	-4.88701	3.96855e-112	1.83522e-109	69.0845	2.07693	69.6433	68.5258	2.57149	1.58236
Cfap126	32.6932	-4.86758	1.33363e-06	7.67503e-06	2.6754	0.0805411	2.70537	2.64543	0.116648	0.0444345
Pde4c	419.766	-4.86644	1.51677e-61	2.02721e-59	9.18621	0.282406	9.17996	9.19247	0.291333	0.273479
Gm36297	16.7581	-4.86041	0.000616991	0.00229174	2.272	0.0738192	2.05995	2.48406	0	0.147638
Clcf1	182.012	-4.85169	7.28914e-26	2.13612e-24	6.97062	0.222694	6.6779	7.26334	0.0911659	0.354223
Arhgef15	1302.11	-4.84028	1.11899e-124	6.31053e-122	35.1023	1.09218	32.7388	37.4657	1.3341	0.850255
Matn4	651.764	-4.838	4.32003e-82	1.05145e-79	38.1169	1.18879	35.2334	41.0004	1.3916	0.985988
Bhlha9	24.0946	-4.79385	6.75996e-05	0.000298746	3.18718	0.108344	2.19881	4.17555	0	0.216687
A330009N23Rik	15.6295	-4.78567	0.00079503	0.00288945	1.40748	0.0460214	1.12076	1.6942	0.0429547	0.0490881
Nphs1	54.3892	-4.78165	4.79932e-10	4.25335e-09	1.45449	0.047311	1.47713	1.43185	0.0509518	0.0436703
Optn	2184.24	-4.75564	2.07059e-205	3.68279e-202	109.153	3.63716	114.713	103.592	3.38209	3.89223
Slc66a2	2740.77	-4.75199	1.35025e-229	2.83823e-226	60.1808	2.01269	62.1593	58.2023	1.80042	2.22497
Ap1m2	930.971	-4.74376	1.36998e-91	4.22356e-89	57.4368	1.91847	67.7292	47.1443	2.05706	1.77988
Afap1l2	445.226	-4.73514	4.85689e-64	6.72461e-62	16.3301	0.551017	16.5497	16.1104	0.542287	0.559746
Rin2	787.487	-4.7119	3.28471e-68	5.09725e-66	23.135	0.801338	18.4269	27.8432	0.575702	1.02697
Sox13	529.764	-4.69404	2.23878e-67	3.42815e-65	11.4092	0.397662	10.1139	12.7045	0.360187	0.435138
4930471E19Rik	14.6597	-4.69016	0.00114636	0.00402096	1.46727	0.0511797	1.61568	1.31886	0.0477693	0.0545901
Plcxd3	30.0342	-4.69008	1.441e-05	7.09212e-05	2.52213	0.0919625	1.67195	3.37231	0	0.183925
Lrrc38	109.047	-4.68404	9.31219e-18	1.59849e-16	2.23997	0.0778224	1.9635	2.51644	0.0883413	0.0673035
Amot	570.576	-4.68387	7.01911e-67	1.04707e-64	9.85982	0.340047	9.64771	10.0719	0.453798	0.226296
Pcp4l1	2153.56	-4.67778	3.28202e-30	1.22993e-28	218.414	7.69419	226.874	209.954	5.4249	9.96348
Gm38491	37.056	-4.66975	1.77619e-06	1.00462e-05	3.07401	0.113575	2.22816	3.91987	0	0.227151
Glis3	1645.2	-4.65134	6.18337e-171	6.80818e-168	21.4724	0.770142	21.1829	21.7619	0.698856	0.841427
Maml3	303.893	-4.64247	1.15187e-44	8.5091e-43	6.81434	0.243435	6.9392	6.68948	0.278657	0.208214
Runx2	63.1104	-4.63465	4.43358e-11	4.34378e-10	1.17823	0.0420427	1.30999	1.04646	0.0535101	0.0305753
Egr2	5609.56	-4.62558	3.77424e-298	1.74536e-294	123.624	4.48897	122.842	124.407	4.87009	4.10785
Hoxc4	153.806	-4.61494	6.20854e-22	1.4341e-20	5.13379	0.189667	3.91098	6.35659	0.159966	0.219368
1810046K07Rik	20.1847	-4.59746	0.000284689	0.00112312	2.21848	0.078647	2.98938	1.44758	0.157294	0
Kcne1	68.759	-4.5935	2.32783e-11	2.3607e-10	3.42355	0.127909	2.51506	4.33205	0.119386	0.136433
9530026P05Rik	67.1046	-4.58691	9.10641e-11	8.60828e-10	10.7498	0.388829	9.70601	11.7936	0.690039	0.0876185
Col18a1	586.177	-4.57954	2.65698e-10	2.41964e-09	12.8345	0.485943	10.4403	15.2287	0.251982	0.719904
Cntn6	349.595	-4.57894	1.99175e-46	1.56113e-44	12.8725	0.490312	12.3466	13.3984	0.335291	0.645333
Ankrd34a	26.8043	-4.57246	2.7815e-05	0.00013056	1.21859	0.0451878	0.737845	1.69933	0.0654455	0.0249301
Zfp366	20.0308	-4.53755	0.000253448	0.00100847	1.15208	0.0454403	0.694979	1.60918	0.0276605	0.06322
Spocd1	671.008	-4.53103	9.64024e-80	2.18531e-77	16.2784	0.631955	14.5462	18.0106	0.651931	0.611979
Gm16348	19.6192	-4.52986	0.000204505	0.000826526	2.29373	0.088016	2.54398	2.04348	0.112023	0.0640091
Pantr1	13.4865	-4.52886	0.00328941	0.0104835	3.93484	0.159671	5.9409	1.92878	0	0.319342
Tspoap1	225.714	-4.51746	0.000848219	0.00306063	1.93128	0.0765619	1.82964	2.03293	0.012321	0.140803
Slc7a14	243.9	-4.50207	4.95553e-35	2.35281e-33	4.26385	0.167191	4.1267	4.401	0.209743	0.124639
Micalcl	221.427	-4.46307	1.04951e-32	4.52739e-31	12.0767	0.496207	12.2109	11.9425	0.393235	0.599178
Ifitm1	24.5758	-4.46173	6.51372e-05	0.000289024	4.52302	0.176592	4.6929	4.35314	0.353183	0
Arhgef9	130.85	-4.45548	0.000488813	0.0018489	3.32375	0.137878	3.08156	3.56595	0.0244355	0.251321
Pcdh1	88.7348	-4.45449	1.13555e-13	1.41087e-12	1.5665	0.0655685	1.31425	1.81875	0.034	0.097137
Gm34672	12.2064	-4.45015	0.00408058	0.012709	1.38268	0.0544134	1.20941	1.55595	0.108827	0
Tubg2	1179.76	-4.43219	5.89887e-126	3.40984e-123	104.743	4.33905	108.292	101.194	4.82401	3.85409
Lrp1	605.112	-4.43054	1.61894e-76	3.31267e-74	6.44136	0.2693	6.09393	6.7888	0.245891	0.292709
Gm35676	25.1737	-4.42272	6.61174e-05	0.000292699	8.30128	0.363252	8.14005	8.46251	0	0.726504
Sidt1	158.597	-4.40993	1.03041e-22	2.51055e-21	5.40677	0.230021	4.41406	6.39948	0.197168	0.262874
Mtus1	2135.73	-4.40821	1.69821e-24	4.64137e-23	41.0113	1.7419	40.2912	41.7314	1.20182	2.28199
Mypop	843.117	-4.40378	9.76477e-73	1.75024e-70	61.2149	2.62197	52.3488	70.081	1.92469	3.31925
Ly6g6c	29.8241	-4.40145	7.48763e-06	3.84731e-05	1.2316	0.0510847	1.20949	1.2537	0.0794663	0.0227032
Smoc2	3095.1	-4.39712	2.7867e-199	4.02714e-196	170.146	7.28162	163.947	176.345	6.30213	8.26111
1810020O05Rik	36.4505	-4.39456	1.97662e-06	1.10876e-05	1.59492	0.0691063	2.23582	0.954019	0.0420665	0.096146
Slc26a10	47.543	-4.39247	2.26854e-08	1.64636e-07	1.77652	0.0745561	1.54782	2.00522	0.10798	0.0411325
Mchr1	30.0323	-4.38206	1.00376e-05	5.0608e-05	2.16736	0.0945903	1.44816	2.88656	0.0697009	0.11948
Gm5667	17.6827	-4.37333	0.00050289	0.00189811	2.67199	0.114496	2.18277	3.1612	0.145726	0.0832669
Msx2	311.194	-4.37204	4.83594e-38	2.6248e-36	22.7592	1.00056	20.05	25.4684	0.670428	1.33069
Sult1c2	17.6611	-4.37153	0.000486668	0.00184199	1.90807	0.0818279	1.71094	2.1052	0.104147	0.0595088
Gm30134	35.5386	-4.36893	8.07043e-07	4.7921e-06	1.67025	0.0728251	1.62025	1.72026	0.0679723	0.0776778
Gm33151	12.0493	-4.35745	0.00488308	0.014915	3.20144	0.146768	2.73042	3.67247	0	0.293537
Rapgef3	291.79	-4.35588	2.30102e-32	9.70881e-31	9.20313	0.411112	8.18144	10.2248	0.213179	0.609045
2410012E07Rik	22.7445	-4.34676	0.000150627	0.000623821	2.65752	0.112436	3.04229	2.27274	0.224871	0
Parp10	198.43	-4.33325	9.08744e-26	2.64968e-24	9.22715	0.417293	7.73041	10.7239	0.269647	0.564939
Sez6l	57.5432	-4.32506	5.19104e-10	4.58469e-09	1.22518	0.0550768	1.14258	1.30777	0.0514067	0.0587469
Parm1	51.0221	-4.32435	1.71006e-08	1.26004e-07	3.8382	0.16866	2.98395	4.69244	0.254292	0.083029
Itpkb	286.809	-4.30956	4.06065e-08	2.85121e-07	6.52692	0.298481	5.95126	7.10258	0.131966	0.464996
Acss1	1200.14	-4.30808	1.43285e-131	9.20288e-129	52.7497	2.39547	52.8397	52.6598	2.29245	2.49849
Tspan8	434.443	-4.29561	3.06131e-54	3.29226e-52	36.5142	1.67236	40.9388	32.0895	1.58256	1.76216
Ddr1	589.201	-4.28319	4.6202e-54	4.94575e-52	4.63859	0.216791	4.3242	4.95299	0.13329	0.300292
Nefm	352.56	-4.27907	7.4676e-46	5.77478e-44	17.2135	0.801312	15.7028	18.7241	0.684935	0.917689
Pik3cd	1591.67	-4.27707	3.85084e-101	1.50914e-98	21.0576	0.980942	17.6956	24.4196	0.813137	1.14875
Mapk11	504.443	-4.27413	1.67288e-07	1.08439e-06	32.5442	1.52273	29.1084	35.9799	0.655499	2.38997
Synj2	326.163	-4.2704	2.98399e-44	2.16288e-42	2.65076	0.122966	2.49169	2.80984	0.133638	0.112294
Dio3	38.8979	-4.2669	3.55486e-07	2.21111e-06	3.28562	0.1546	3.59134	2.9799	0.122518	0.186682
Sgsm1	454.833	-4.26583	8.68031e-58	1.01881e-55	10.7787	0.506153	10.1944	11.3631	0.435733	0.576573
Slc9a9	38.1718	-4.26017	5.31492e-07	3.2272e-06	1.52968	0.0705328	1.64657	1.4128	0.0968117	0.044254
Hspb3	22.2139	-4.25224	0.00012669	0.000532508	4.48069	0.21628	4.53088	4.43051	0.0976794	0.33488
Pcdh12	151.389	-4.24596	5.89652e-20	1.1897e-18	4.26783	0.199936	3.32517	5.21049	0.259435	0.140437
Eml2	175.839	-4.24464	5.89171e-25	1.6413e-23	7.8367	0.376105	7.77879	7.89462	0.258968	0.493241
Arhgap31	961.064	-4.23087	4.62932e-09	3.66322e-08	19.6012	0.943425	18.4924	20.71	0.464325	1.42252
Rspo2	2312.29	-4.22965	1.48707e-149	1.27348e-146	87.882	4.19455	81.2641	94.4998	4.74957	3.63953
Dusp26	329.219	-4.22559	5.8575e-45	4.42605e-43	25.4698	1.22842	25.8531	25.0864	1.08661	1.37022
Kdr	182.231	-4.21484	1.03589e-26	3.21502e-25	3.73156	0.181395	3.86341	3.59971	0.158726	0.204063
Aplp1	535.537	-4.21107	5.69128e-65	8.12307e-63	35.2351	1.71987	34.1485	36.3218	1.43518	2.00457
Fblim1	797.606	-4.20704	2.4547e-73	4.65226e-71	34.0104	1.66388	38.6567	29.364	1.32171	2.00605
Spdye4b	21.0101	-4.20612	0.000192853	0.000783542	1.13093	0.0539691	1.20854	1.05332	0.0781635	0.0297747
Slamf9	16.3856	-4.20524	0.00144977	0.00498315	2.1244	0.107986	1.82629	2.42252	0	0.215971
Hspb7	21.2483	-4.20388	0.000163073	0.000671039	1.20908	0.0590564	1.3583	1.05985	0.0551211	0.0629916
Dusp4	638.303	-4.19209	5.33504e-72	9.41656e-70	41.3527	2.03858	37.3922	45.3131	1.88597	2.19118
Edar	118.007	-4.18084	2.54877e-15	3.62439e-14	3.29787	0.159725	2.90746	3.68828	0.257499	0.0619509
Efcab6	153.729	-4.17679	3.24229e-19	6.24734e-18	3.90804	0.190206	3.5979	4.21819	0.29588	0.0845318
Smad6	369.782	-4.17406	5.8051e-49	5.02717e-47	19.4059	0.967245	20.5396	18.2722	0.916368	1.01812
Crygs	133.623	-4.15638	2.85577e-20	5.88512e-19	22.0105	1.10807	22.1009	21.9201	1.11952	1.09661
Gm4208	10.2841	-4.15479	0.0159878	0.0426083	1.10861	0.0557911	2.06319	0.154039	0.0520734	0.0595088
Gm30163	9.90464	-4.13837	0.0121134	0.033443	2.77114	0.135502	3.40453	2.13776	0.271004	0
Cyth4	215.942	-4.13376	3.59782e-27	1.13957e-25	11.6665	0.590855	10.0494	13.2837	0.761563	0.420147
Tmem62	108.948	-4.13172	6.699e-13	7.84633e-12	4.9467	0.260068	5.69383	4.19957	0.0662027	0.453933
Nab2	905.777	-4.12379	3.56451e-16	5.42943e-15	55.1435	2.8567	45.4352	64.8518	1.95533	3.75807
Aldh1a3	218.41	-4.12126	2.99631e-27	9.54278e-26	10.0837	0.512697	9.97112	10.1963	0.71779	0.307605
Lockd	14.6434	-4.11742	0.00267449	0.0086829	3.79592	0.18852	4.49372	3.09812	0.377039	0
Phf2	101.038	-4.10861	1.42027e-13	1.74771e-12	3.01513	0.15953	3.74212	2.28813	0.0870201	0.232039
Dkk2	24.7057	-4.10125	5.76053e-05	0.00025788	1.02759	0.0534779	0.977735	1.07745	0.0607063	0.0462496
Gm2137	54.6626	-4.0982	3.09498e-09	2.49172e-08	6.92523	0.365611	6.67484	7.17561	0.308357	0.422864
Macc1	30.0116	-4.0981	1.9916e-05	9.55984e-05	1.09558	0.0582768	1.47408	0.717069	0.0354744	0.0810792
Cyp1b1	54.2398	-4.09365	3.99053e-09	3.18388e-08	1.64659	0.0865751	1.47128	1.82189	0.0886893	0.0844608
Smkr-ps	851.122	-4.08299	1.97624e-80	4.61563e-78	201.299	10.7168	178.067	224.531	9.44952	11.984
Cdh13	122.918	-4.08059	5.69353e-18	9.98831e-17	4.6334	0.247678	5.12396	4.14283	0.201819	0.293537
Gm39105	33.8035	-4.07691	5.73589e-06	3.00738e-05	5.68981	0.297856	7.34842	4.03121	0.40883	0.186882
Irf2	116.665	-4.07522	1.28637e-17	2.17582e-16	2.82756	0.150026	2.83938	2.81575	0.165201	0.13485
Dlx4os	62.6827	-4.07228	9.59974e-10	8.20877e-09	5.90029	0.311278	4.69901	7.10156	0.412861	0.209694
Zfp37	526.434	-4.06975	5.97316e-55	6.54556e-53	10.3046	0.547618	11.7347	8.87454	0.638111	0.457126
A330049N07Rik	14.144	-4.06667	0.00397855	0.0124297	1.11835	0.0575321	1.59377	0.642926	0.115064	0
Gm41699	9.42695	-4.06507	0.0165088	0.0438804	3.90179	0.200757	5.62609	2.17749	0.401514	0
9930012K11Rik	105.872	-4.04868	1.26811e-15	1.85108e-14	8.33409	0.455448	7.31273	9.35544	0.384127	0.52677
Olah	194.494	-4.04825	4.15839e-24	1.10264e-22	20.1994	1.0833	23.4501	16.9487	1.41554	0.751057
Zfp462	2042.45	-4.03577	2.35084e-137	1.69863e-134	16.093	0.885456	15.8802	16.3059	0.7342	1.03671
Parp14	429.674	-4.01695	2.49809e-37	1.31574e-35	6.45573	0.363258	6.31187	6.59959	0.19815	0.528366
4933434P08Rik	32.1282	-4.01181	1.13277e-05	5.67538e-05	4.68014	0.253681	4.66764	4.69264	0.426188	0.0811736
Gm12958	14.4604	-4.01067	0.00420454	0.0130476	1.44952	0.0838273	2.07932	0.81973	0	0.167655
Rhof	418.777	-4.01065	4.25456e-48	3.57723e-46	6.16147	0.341844	5.5277	6.79523	0.388049	0.295638
Itprip	65.5297	-4.00431	1.68398e-10	1.55748e-09	2.56773	0.144903	2.66329	2.47218	0.114833	0.174973
Rbpjl	36.0242	-3.99962	1.39357e-05	6.87331e-05	2.17814	0.118047	1.85373	2.50256	0.236093	0
Mical1	773.827	-3.99899	3.52966e-78	7.69932e-76	25.666	1.44965	24.0307	27.3012	1.23201	1.66728
Tm4sf5	140.484	-3.99131	6.45177e-17	1.03452e-15	11.2609	0.623147	11.682	10.8397	0.978046	0.268247
Osbpl3	1532.34	-3.98787	7.66325e-18	1.32826e-16	31.599	1.79685	29.0169	34.1811	1.22004	2.37367
Gm41533	225.007	-3.98561	7.51808e-30	2.75052e-28	35.502	2.00896	39.2435	31.7605	2.08057	1.93734
Krt17	36.9253	-3.9774	2.74496e-06	1.50937e-05	3.70208	0.214026	2.7058	4.69837	0.147368	0.280684
Krtap17-1	108.275	-3.97321	6.28735e-15	8.63791e-14	22.1719	1.24977	25.2179	19.126	1.69972	0.79982
Fgl1	1018.75	-3.9732	1.17241e-96	4.17052e-94	120.194	6.88222	131.45	108.939	6.51587	7.24856
Ssu2	46.0651	-3.96835	1.37779e-07	9.01453e-07	2.7643	0.161495	2.92274	2.60585	0.0880919	0.234897
F2rl1	244.168	-3.96557	1.56423e-32	6.68542e-31	13.7607	0.787423	13.7162	13.8052	0.881938	0.692908
Mgat4f	31.8874	-3.96277	9.85367e-06	4.97895e-05	1.98945	0.115425	2.44559	1.53331	0.0914719	0.139377
Hs3st3b1	604.797	-3.96042	9.33746e-49	7.99632e-47	15.6322	0.911464	13.7509	17.5136	0.607668	1.21526
Mocos	62.9116	-3.96038	5.85537e-10	5.13806e-09	1.79095	0.102361	1.96303	1.61886	0.125221	0.0795007
Xkrx	87.8954	-3.94215	5.15754e-12	5.58822e-11	3.04912	0.174563	2.95213	3.14612	0.271547	0.0775799
Tmc6	1399.92	-3.94052	1.73821e-116	8.93132e-114	42.6174	2.4981	39.1162	46.1187	2.3714	2.62479
Sdcbp2	400.056	-3.93958	1.04735e-46	8.29342e-45	32.9508	1.91995	36.218	29.6836	2.13589	1.704
D430019H16Rik	401.392	-3.93777	5.0388e-41	3.23631e-39	10.8001	0.640381	10.5625	11.0376	0.421916	0.858846
Upp1	1692.05	-3.92753	3.74692e-142	2.79472e-139	151.56	8.94892	160.287	142.832	8.77373	9.12412
4930590L20Rik	12.906	-3.92625	0.00576892	0.0173181	3.65198	0.207679	3.34488	3.95907	0.415359	0
Nlgn3	43.4081	-3.92235	8.06798e-07	4.79188e-06	1.73965	0.101038	1.32899	2.15032	0.157172	0.0449036
Ddit4	1922.31	-3.92206	1.03515e-146	8.25338e-144	177.567	10.5551	175.225	179.909	9.4171	11.693
Gm11827	8.83258	-3.92128	0.0171289	0.0453151	1.09455	0.0650231	1.23162	0.957483	0.0606902	0.0693559
Pou3f2	70.8935	-3.90886	1.54332e-10	1.43369e-09	1.75719	0.106858	1.75135	1.76302	0.060816	0.152899
Spag8	191.131	-3.90619	3.58248e-25	1.00772e-23	17.8521	1.06234	19.4143	16.2899	1.23561	0.889063
Pygl	3230.07	-3.89931	3.60215e-198	4.89934e-195	178.03	10.7221	170.204	185.856	10.6278	10.8164
1700024G13Rik	8.64069	-3.88707	0.018868	0.0493347	3.37184	0.205362	2.96367	3.78001	0.191677	0.219046
Igsf5	143.378	-3.88023	9.44064e-17	1.49819e-15	8.19585	0.490634	8.2364	8.1553	0.756988	0.224279
Socs3	918.675	-3.87008	1.06503e-89	2.96695e-87	39.6023	2.42596	42.1673	37.0373	2.60288	2.24904
Gm35252	17.2771	-3.86472	0.00119605	0.00417622	1.34146	0.0845418	1.36521	1.31771	0.038182	0.130902
Arhgef6	89.1696	-3.85835	1.49128e-12	1.69859e-11	1.9406	0.120562	2.35379	1.52741	0.10683	0.134293
6720468P15Rik	51.0579	-3.85549	6.06394e-08	4.14824e-07	4.43208	0.277787	3.42793	5.43623	0.213691	0.341884
Map7d3	114.373	-3.84814	6.44823e-16	9.61289e-15	4.42897	0.278768	4.74671	4.11123	0.209424	0.348112
Cnga3	76.0821	-3.8432	2.56774e-11	2.59263e-10	3.0496	0.192944	3.14397	2.95523	0.138024	0.247864
Ube2u	12.9727	-3.84228	0.00669017	0.0197485	1.32448	0.0862035	1.4093	1.23966	0	0.172407
1700011L22Rik	12.2075	-3.84192	0.00792628	0.0229376	1.59756	0.0963227	1.67548	1.51964	0.192645	0
Fgr	43.0523	-3.84184	2.61163e-06	1.44154e-05	1.64093	0.105945	1.57857	1.70329	0.0187762	0.193114
Cfap54	96.9788	-3.83808	2.10302e-12	2.35918e-11	1.27533	0.0810228	0.920811	1.62985	0.0583387	0.103707
Pik3r6	141.484	-3.8265	1.34472e-19	2.64618e-18	5.85855	0.372676	5.88903	5.82807	0.326102	0.419249
Pla2g7	2812.87	-3.82446	2.51394e-188	3.22929e-185	132.277	8.38338	130.153	134.401	8.54069	8.22607
B430010I23Rik	17.0737	-3.8208	0.00228424	0.0075183	1.27074	0.0838677	1.34748	1.194	0	0.167735
Cd7	20.8932	-3.80816	0.000502859	0.00189811	3.10426	0.203939	3.53749	2.67104	0.0732127	0.334666
Cutal	32.7893	-3.80558	9.86205e-06	4.98209e-05	2.15661	0.139003	1.78661	2.5266	0.129741	0.148266
Ptch1	466.247	-3.79451	5.87094e-54	6.22696e-52	9.40688	0.607727	9.82629	8.98747	0.636144	0.57931
Bco1	40.7529	-3.78777	1.56099e-06	8.90092e-06	1.48782	0.0975999	1.87648	1.09917	0.0719185	0.123281
Gm52828	27.864	-3.78059	4.94681e-05	0.000223486	2.51933	0.16223	2.71129	2.32737	0.222673	0.101787
Myo18b	54.7926	-3.77998	3.16156e-07	1.97893e-06	1.00311	0.0637508	1.0106	0.995615	0.117199	0.0103026
Csta2	16.3434	-3.77826	0.00192006	0.00642019	4.48145	0.299494	5.22846	3.73444	0.135262	0.463726
Syn1	146.423	-3.76564	1.8331e-15	2.63752e-14	7.03236	0.47315	6.03445	8.03027	0.213691	0.732609
Lpo	49.2529	-3.7638	1.44425e-06	8.28222e-06	1.29105	0.0879436	1.22743	1.35467	0.0129609	0.162926
Rhbdl3	117.4	-3.75391	2.7513e-15	3.89801e-14	3.46245	0.227735	3.24992	3.67498	0.305733	0.149737
Trf	1109.33	-3.7536	7.40353e-11	7.09132e-10	73.3992	4.91381	58.6735	88.1249	3.1732	6.65442
Pdgfra	654.536	-3.74737	2.39103e-57	2.76427e-55	11.1062	0.740346	9.64365	12.5687	0.838602	0.64209
Pla2r1	59.1755	-3.74365	6.12886e-09	4.77625e-08	1.28251	0.0863574	1.4889	1.07611	0.0748967	0.0978181
Ocln	3773.54	-3.74178	8.39549e-136	5.88244e-133	131.419	8.85495	131.245	131.592	7.22779	10.4821
Plxnb2	461.009	-3.73703	7.73997e-38	4.17164e-36	8.11472	0.550119	6.27253	9.9569	0.453056	0.647182
Mrc1	182.715	-3.73565	8.87893e-20	1.77287e-18	5.30219	0.362712	5.76684	4.83754	0.200832	0.524591
Osr1	18.9128	-3.73387	0.00197078	0.00657299	1.45736	0.0948379	1.97959	0.935135	0.189676	0
Arhgap33	580.482	-3.72654	1.39101e-08	1.0402e-07	15.4364	1.05423	12.1257	18.7472	0.618833	1.48962
Ccsap	112.059	-3.72619	2.46515e-15	3.51197e-14	4.62258	0.311536	4.90424	4.34091	0.366865	0.256207
Ccdc65	143.248	-3.72397	2.67554e-19	5.18557e-18	11.0043	0.745875	11.4123	10.5963	0.797431	0.694319
Gm34585	19.7893	-3.7233	0.000803378	0.00291429	3.45061	0.24039	3.75278	3.14844	0.0862982	0.394482
Klhl36	270.144	-3.71951	4.67111e-31	1.8431e-29	18.7914	1.27864	16.401	21.1817	1.37703	1.18024
Atp1b4	31.456	-3.71731	2.7675e-05	0.000130061	1.13223	0.0789689	1.05119	1.21326	0.0356651	0.122273
Rab4a	483.39	-3.71461	4.59039e-45	3.47997e-43	47.6979	3.29306	47.5271	47.8687	2.34431	4.24181
Dtx3	272.305	-3.70757	1.34331e-33	6.03106e-32	13.0348	0.895185	12.6837	13.3858	0.92398	0.866389
Dact2	296.609	-3.69495	3.37454e-24	8.98918e-23	15.3986	1.07837	10.8802	19.917	0.772924	1.38382
Arhgap9	270.288	-3.68444	6.85328e-31	2.68579e-29	11.6923	0.821929	12.7563	10.6283	0.664302	0.979555
Zfp365	284.433	-3.67683	4.08561e-33	1.79596e-31	10.2866	0.718082	10.1655	10.4078	0.842264	0.5939
Nfkbil1	210.309	-3.67532	1.40233e-26	4.31179e-25	5.17664	0.363438	5.02323	5.33005	0.378265	0.34861
Trpc7	73.3836	-3.67528	1.89428e-08	1.38958e-07	2.93127	0.210712	3.55882	2.30372	0.0593986	0.362026
Helz2	183.951	-3.67234	5.82459e-23	1.44347e-21	2.74807	0.193736	2.46358	3.03257	0.192683	0.194788
Slc13a4	30.5223	-3.67026	4.02255e-05	0.000183595	1.36923	0.0986074	1.37716	1.36129	0.0445345	0.15268
Gulo	280.795	-3.66363	3.45593e-06	1.87007e-05	18.6822	1.33509	16.9144	20.45	0.594449	2.07572
Erbb3	1910.8	-3.65666	3.20532e-121	1.72357e-118	48.9498	3.49698	45.8622	52.0374	3.12831	3.86564
Pou5f1	850.123	-3.65316	7.80068e-75	1.5416e-72	30.2046	2.16597	31.6727	28.7364	1.83358	2.49835
Gm7694	325.936	-3.65203	2.77784e-27	8.89601e-26	13.0475	0.941083	9.94361	16.1513	0.676697	1.20547
Gnl3l	664.048	-3.65063	6.06502e-60	7.49922e-58	20.6647	1.48747	20.8862	20.4432	1.17413	1.80081
Ntsr1	108.845	-3.6486	4.34176e-13	5.16145e-12	4.26505	0.310291	3.70865	4.82145	0.175329	0.445252
Gm30509	25.5622	-3.64795	0.000164395	0.000675877	3.31977	0.234317	4.10253	2.53701	0.321617	0.147016
Gfpt2	1662.55	-3.64737	1.47512e-96	5.16784e-94	85.6024	6.15695	93.9168	77.288	5.16078	7.15312
Tcp11x2	29.3485	-3.64678	8.59664e-05	0.00037265	2.54688	0.181019	3.61134	1.48242	0.214774	0.147264
Zmynd15	135.428	-3.6397	2.46911e-17	4.09252e-16	2.99254	0.214545	3.34759	2.63748	0.241174	0.187916
Aox4	406.013	-3.63856	3.52335e-34	1.60684e-32	12.4736	0.890388	13.8577	11.0895	1.18866	0.592116
Ldb3	73.0319	-3.63644	2.34025e-10	2.14048e-09	1.83608	0.131859	2.07326	1.5989	0.149681	0.114036
Large2	4195.86	-3.63606	1.56493e-161	1.64474e-158	227.941	16.5068	213.285	242.596	14.8742	18.1395
Gm7278	14.1668	-3.63297	0.00824446	0.023781	1.21785	0.0850001	1.80709	0.628599	0.17	0
Chil1	36.3024	-3.62714	5.67119e-06	2.97413e-05	2.69109	0.194512	2.98726	2.39492	0.220803	0.168221
Cd274	512.757	-3.62535	1.42613e-44	1.05016e-42	19.6357	1.41894	22.0264	17.2451	1.72992	1.10795
Lipg	78.332	-3.62482	3.43928e-09	2.75548e-08	2.91947	0.21737	2.60024	3.23871	0.0742278	0.360513
Sdc4	23912.3	-3.62234	3.19493e-203	5.27666e-200	1491.78	108.981	1472.21	1511.36	95.4835	122.478
Lpar3	996.508	-3.62019	6.09646e-71	1.02147e-68	61.2885	4.50507	59.178	63.3991	3.48708	5.52306
Fkbp14	318.895	-3.61537	5.91369e-37	3.04535e-35	8.02986	0.589534	7.63718	8.42253	0.563609	0.615459
Scn2a	132.942	-3.61338	3.4407e-17	5.63028e-16	2.22667	0.162345	2.22861	2.22473	0.191489	0.133202
Adcy10	497.889	-3.59758	8.01858e-50	7.24241e-48	9.73184	0.718286	9.59579	9.86789	0.836402	0.600171
Lhfpl2	703.125	-3.59651	7.50353e-56	8.46325e-54	13.9202	1.03709	11.7435	16.0968	0.946937	1.12724
Enc1	2577.18	-3.59487	2.02348e-151	1.79949e-148	56.6612	4.20534	55.743	57.5794	4.50875	3.90192
Col13a1	668.155	-3.59461	2.08654e-64	2.94177e-62	15.5695	1.15875	14.3989	16.7402	1.13724	1.18026
Lins1	635.649	-3.58991	3.25503e-55	3.60109e-53	17.7828	1.3356	17.8008	17.7648	1.0311	1.64011
Kat2b	353.023	-3.58965	1.62804e-38	9.22633e-37	11.0602	0.826305	12.1739	9.94662	0.779559	0.873051
Gm51751	78.4018	-3.58357	6.91717e-11	6.65026e-10	1.8557	0.139889	1.6988	2.0126	0.117983	0.161795
Cyp2c55	307.43	-3.58194	3.64924e-32	1.51486e-30	22.7598	1.70231	26.3417	19.1779	1.80497	1.59964
Dgkk	912.778	-3.58078	2.2533e-48	1.90149e-46	9.75985	0.729096	8.03557	11.4841	0.922146	0.536045
Wif1	134.896	-3.57933	3.28119e-17	5.38451e-16	9.20738	0.69509	8.48353	9.93122	0.612479	0.777702
Ifnar2	179.813	-3.57642	2.00802e-22	4.7767e-21	8.66437	0.651747	8.28407	9.04467	0.672349	0.631146
Myc	35.3283	-3.57502	1.55472e-05	7.61292e-05	2.25862	0.17035	2.98081	1.53643	0.158999	0.181702
Asb7	371.857	-3.57301	7.42816e-05	0.000326094	4.56434	0.346832	4.79891	4.32977	0.134546	0.559118
Cpsf4l	147.169	-3.57173	1.78669e-18	3.2376e-17	12.4901	0.938852	13.4781	11.5021	1.05661	0.82109
Gfi1b	17.5033	-3.57024	0.00157181	0.00536433	1.47104	0.110654	1.49708	1.44499	0.125611	0.0956975
Cnr1	186.346	-3.56817	9.22562e-23	2.25491e-21	2.31966	0.175872	2.5233	2.11601	0.167461	0.184284
Elk3	88.0713	-3.56787	1.15835e-11	1.20646e-10	2.88282	0.219357	2.41528	3.35037	0.196028	0.242686
Sema4a	62.8128	-3.5665	4.68842e-09	3.70745e-08	1.46929	0.110779	1.37481	1.56378	0.128273	0.0932839
2900026A02Rik	1378.72	-3.5621	6.31121e-60	7.76211e-58	16.6127	1.26951	13.036	20.1894	1.04693	1.49209
Ccdc141	1438.17	-3.56124	7.43724e-114	3.65881e-111	29.2746	2.2299	28.266	30.2831	2.16253	2.29727
Armcx2	1937.09	-3.54773	1.06322e-113	5.12162e-111	76.9717	5.89655	74.0087	79.9347	6.60353	5.18958
Nipal1	132.109	-3.54672	6.08442e-17	9.76972e-16	4.80056	0.370605	4.64593	4.95519	0.326558	0.414651
Trim63	31.2551	-3.5421	3.31878e-05	0.000153566	2.16196	0.167887	1.90399	2.41993	0.138265	0.197509
Pdx1	33.972	-3.53377	2.39806e-05	0.000113833	2.56766	0.196919	2.00726	3.12806	0.264363	0.129476
Gm33616	41.0597	-3.53331	2.53616e-06	1.4039e-05	8.51014	0.657124	10.0892	6.93105	0.723595	0.590653
2610016A17Rik	37.0395	-3.53316	1.44818e-05	7.12441e-05	11.947	0.908174	11.1982	12.6957	1.4485	0.36785
Htr7	44.1087	-3.53108	1.15739e-06	6.72562e-06	1.79468	0.137821	1.74686	1.84251	0.182798	0.0928439
Cpvl	34.0914	-3.53016	5.7146e-05	0.000255973	2.13035	0.164447	3.18697	1.07373	0.186674	0.142219
Adh6b	105.809	-3.52585	1.43989e-13	1.77091e-12	6.07046	0.472488	6.97363	5.1673	0.48682	0.458155
Efcc1	169.353	-3.52549	7.96995e-19	1.48614e-17	3.14341	0.247767	3.40597	2.88085	0.166952	0.328583
Med14	897.51	-3.52345	2.8872e-73	5.42747e-71	13.9987	1.09624	15.2607	12.7368	0.981642	1.21084
Bcl6b	1265.21	-3.51842	5.09473e-100	1.96334e-97	28.1734	2.20916	26.618	29.7288	2.20446	2.21386
Klhl6	24.7444	-3.51765	0.00151026	0.00517183	1.57175	0.126874	2.299	0.844491	0	0.253748
Cdh1	1795.66	-3.51728	2.62084e-88	7.21418e-86	61.7803	4.86493	54.1598	69.4007	4.18274	5.54713
Chn2	1397.11	-3.514	9.31302e-91	2.69169e-88	20.7868	1.6289	22.6343	18.9393	1.81372	1.44409
Pdzd2	584.668	-3.5119	1.10011e-47	9.05225e-46	5.00495	0.392031	4.52199	5.4879	0.470938	0.313123
Kif3c	1771.83	-3.50988	3.85243e-112	1.81788e-109	39.4448	3.1147	36.1879	42.7017	2.99626	3.23315
Nrp1	91.2986	-3.50787	2.50441e-12	2.77998e-11	1.43903	0.113742	1.43222	1.44584	0.110368	0.117117
H2-Ab1	312.679	-3.50641	2.56934e-05	0.000121241	10.0514	0.793299	15.4567	4.64608	0.689153	0.897446
Gm35167	22.8274	-3.50631	0.00129467	0.00448269	3.25809	0.249073	3.91988	2.59629	0.498147	0
Dlx3	1192.86	-3.50353	2.20759e-85	5.54825e-83	69.6785	5.53247	63.0968	76.2602	5.11703	5.94792
Dtx3l	271.475	-3.50344	1.78061e-25	5.1464e-24	7.97856	0.636285	6.37466	9.58246	0.515357	0.757213
Gm13470	157.287	-3.50169	3.7603e-14	4.83568e-13	38.8563	3.11238	51.0561	26.6564	1.85164	4.37313
Nr2e1	203.451	-3.49217	1.64877e-22	3.95876e-21	9.47277	0.754625	8.09108	10.8545	0.816284	0.692966
Tex37	17.0821	-3.49141	0.00279489	0.00903068	2.26262	0.184787	2.62832	1.89691	0.066337	0.303236
Trim46	227.604	-3.48949	2.75165e-24	7.38093e-23	7.64117	0.612915	6.4063	8.87603	0.572073	0.653757
Fancb	200.119	-3.48776	1.39649e-23	3.61585e-22	8.62191	0.690559	7.98733	9.25649	0.690581	0.690538
Fer1l6	185.827	-3.48668	3.74956e-19	7.18287e-18	3.1735	0.257173	3.46291	2.88408	0.162496	0.351849
Gm13110	80.3973	-3.48652	1.73021e-10	1.59931e-09	4.12994	0.332969	3.43468	4.8252	0.28331	0.382628
Etv2	19.9794	-3.48219	0.000978256	0.00348095	2.08813	0.168062	2.52643	1.64984	0.156863	0.179261
Dlk2	101.44	-3.47765	4.23697e-12	4.62764e-11	6.51088	0.518298	7.29145	5.73032	0.706367	0.330229
Syt16	128.264	-3.47739	1.00245e-15	1.47165e-14	4.7458	0.379762	4.83359	4.65801	0.463135	0.296388
Adipoq	13.7403	-3.47685	0.0100026	0.0282703	1.69376	0.141527	1.55581	1.83171	0	0.283053
Zbtb7c	112.616	-3.46991	1.25094e-13	1.54675e-12	3.51962	0.286785	2.91005	4.12918	0.250946	0.322625
Etv4	917.062	-3.46906	5.12572e-65	7.36129e-63	56.98	4.6476	53.3335	60.6265	3.73959	5.55562
Dmp1	40.2711	-3.46682	9.26161e-06	4.69414e-05	1.97663	0.163783	1.6679	2.28536	0.0739699	0.253595
Capn2	107.376	-3.45998	1.52944e-13	1.87506e-12	4.92561	0.399066	4.97696	4.87426	0.482833	0.3153
Cxcl16	118.253	-3.45743	5.35503e-15	7.42765e-14	4.95927	0.407242	4.98116	4.93737	0.357664	0.45682
Ldhc	66.4004	-3.45537	1.3457e-08	1.00794e-07	6.88672	0.572782	6.94439	6.82905	0.312441	0.833124
Extl1	154.438	-3.45447	1.09137e-15	1.59814e-14	5.60534	0.453868	4.89129	6.31939	0.637247	0.270488
Bicra	165.994	-3.45321	3.34484e-18	5.96755e-17	4.06598	0.332982	3.29261	4.83936	0.356714	0.30925
Boc	51.5486	-3.44985	4.09291e-07	2.52229e-06	1.76915	0.143978	1.4318	2.1065	0.189513	0.0984422
Tmem132b	95.3432	-3.44835	5.63207e-10	4.95339e-09	1.82251	0.147105	1.89765	1.74738	0.239476	0.0547341
Cyp4v3	69.4186	-3.44192	2.47196e-07	1.56636e-06	3.65091	0.295205	4.70615	2.59566	0.50016	0.0902489
Abcd2	322.792	-3.44046	3.22812e-35	1.55178e-33	8.5475	0.705327	8.70784	8.38715	0.75756	0.653094
Gm34513	80.6955	-3.43066	8.76165e-11	8.31296e-10	2.20421	0.184311	2.17529	2.23312	0.164709	0.203912
Mypn	212.923	-3.42996	1.8084e-21	4.05173e-20	6.17007	0.508961	6.61889	5.72125	0.668934	0.348988
Rasal3	267.757	-3.42915	6.27669e-23	1.55053e-21	9.42087	0.795023	8.72137	10.1204	0.477793	1.11225
Plxdc2	790.58	-3.42834	8.20992e-66	1.18644e-63	9.38163	0.78049	10.1565	8.60674	0.846051	0.714928
St18	99.2188	-3.4239	7.91021e-09	6.08474e-08	1.50621	0.128759	1.49849	1.51394	0.0305548	0.226964
Tmem52	179.233	-3.42132	2.45766e-21	5.46405e-20	28.1072	2.35858	29.0163	27.1981	2.28548	2.43169
Gm41304	212.219	-3.42114	1.62485e-22	3.90944e-21	10.9924	0.927079	9.52054	12.4642	0.781902	1.07226
Gm3858	279.584	-3.41934	0.00178322	0.00600781	23.0299	1.91781	25.8264	20.2333	3.26829	0.567335
Gm26654	15.6763	-3.4188	0.00419761	0.0130296	2.06981	0.17043	2.11364	2.02597	0.265118	0.0757432
Pdzk1	21.8348	-3.41779	0.000993163	0.00352911	1.01147	0.0830903	0.921796	1.10115	0.139593	0.0265875
Sall1	990.676	-3.41054	1.21632e-54	1.32037e-52	26.2876	2.23564	25.2275	27.3476	1.6024	2.86888
Nfatc1	124.385	-3.40625	3.4568e-14	4.45779e-13	2.53401	0.216256	2.09272	2.97529	0.174477	0.258034
Mgl2	222.436	-3.40595	2.22866e-19	4.34861e-18	9.54009	0.818718	10.0339	9.04626	0.453322	1.18411
Enpp3	27.7509	-3.40434	0.000308405	0.00121089	1.49619	0.123887	1.33562	1.65676	0.216803	0.03097
Mmp9	863.107	-3.40427	3.11216e-71	5.29113e-69	34.3012	2.90078	35.7307	32.8716	3.1978	2.60376
Slc38a1	729.793	-3.40267	4.02761e-63	5.47802e-61	9.55391	0.813834	10.1134	8.99446	0.724479	0.90319
Cspg4b	139.068	-3.40194	5.17381e-17	8.35398e-16	2.06013	0.175205	2.00298	2.11728	0.171483	0.178928
Ell3	1431.19	-3.4001	2.49984e-106	1.07039e-103	129.572	11.0378	125.819	133.324	10.6183	11.4574
Gm34043	21.7438	-3.39578	0.000930101	0.00332907	3.30717	0.278178	4.28011	2.33423	0.38182	0.174535
Ror2	79.6395	-3.39187	9.77441e-10	8.34887e-09	3.02595	0.26253	3.14495	2.90696	0.15315	0.371911
Hnf1b	177.794	-3.38529	5.64349e-20	1.14064e-18	8.10871	0.6961	7.17444	9.04299	0.735524	0.656677
Gm46819	33.778	-3.37934	4.89022e-05	0.000221102	5.92577	0.503955	7.32951	4.52203	0.70555	0.30236
Rragd	4484.09	-3.37709	4.30303e-102	1.71542e-99	130.253	11.294	135.462	125.043	8.97243	13.6157
Akr1b8	1406.06	-3.37096	3.5179e-69	5.60971e-67	160.031	13.9687	156.429	163.633	10.6194	17.318
Esr2	33.6397	-3.36229	3.35629e-05	0.000155084	1.51522	0.131281	1.71037	1.32008	0.158838	0.103724
Spon1	378.057	-3.36126	2.35282e-39	1.38076e-37	9.27393	0.809478	9.36162	9.18624	0.841316	0.777639
Cpne8	190.583	-3.36105	1.6215e-16	2.54186e-15	5.62241	0.485798	4.84667	6.39815	0.699477	0.27212
Rgs14	23.9787	-3.35909	0.000926335	0.00331662	1.53951	0.131442	1.99668	1.08234	0.22599	0.036894
Cd70	49.9518	-3.35865	1.48317e-06	8.49489e-06	8.9509	0.795975	7.09195	10.8099	0.453014	1.13894
Acacb	231.377	-3.3533	1.87285e-21	4.19207e-20	3.68825	0.326313	2.94324	4.43325	0.265895	0.386732
Gm32743	43.3715	-3.35242	3.30283e-06	1.7931e-05	4.06658	0.361906	4.16427	3.9689	0.236771	0.487041
Rxrg	73.1786	-3.3472	1.04224e-09	8.87939e-09	4.41964	0.389833	4.41974	4.41954	0.396378	0.383287
Btbd17	39.5544	-3.34378	8.25615e-06	4.22155e-05	1.33989	0.118376	1.60156	1.07821	0.1196	0.117152
Snph	58.4307	-3.34093	2.08724e-07	1.33687e-06	1.64651	0.147708	1.26797	2.02505	0.0998342	0.195581
Epha1	273.126	-3.34008	9.29314e-30	3.38921e-28	12.3329	1.09305	12.3199	12.3459	1.11752	1.06858
Foxa2	39.4637	-3.33979	6.49898e-06	3.37305e-05	2.51445	0.223016	2.42627	2.60263	0.225322	0.22071
Hpn	58.0841	-3.33794	9.18261e-08	6.12934e-07	4.37809	0.392125	3.83159	4.9246	0.304998	0.479253
Tmem132c	279.018	-3.33697	3.11634e-26	9.33367e-25	8.24418	0.726816	8.13197	8.3564	0.92506	0.528573
Gm36876	44.4701	-3.33298	7.18959e-06	3.70158e-05	2.00002	0.174939	2.32296	1.67707	0.272132	0.0777471
Il1r2	582.998	-3.33117	9.30514e-50	8.37173e-48	21.6377	1.9382	23.3233	19.952	1.66903	2.20737
Macroh2a2	2760.38	-3.32958	2.65528e-102	1.07711e-99	153.317	13.7456	152.923	153.712	11.2873	16.2039
Krt24	84.9821	-3.32751	1.76439e-10	1.62795e-09	6.94572	0.62543	7.82315	6.06828	0.495642	0.755218
Sall3	118.157	-3.3275	8.25725e-13	9.60383e-12	1.6794	0.15113	1.28664	2.07216	0.129545	0.172716
A830035A12Rik	20.1996	-3.31534	0.00337328	0.0107227	7.46355	0.652828	7.57039	7.3567	1.30566	0
Gprc5a	48.8043	-3.3145	3.44984e-06	1.86765e-05	3.31611	0.304487	3.92028	2.71193	0.137517	0.471458
9330179D12Rik	94.3936	-3.31165	4.70249e-11	4.58587e-10	9.53695	0.853458	10.3131	8.76083	1.12338	0.583537
Fam234b	1780.33	-3.30989	2.70616e-67	4.11657e-65	58.208	5.2621	48.9821	67.4339	6.07718	4.44702
Slc2a12	39.6446	-3.30204	4.17735e-05	0.000190248	1.33876	0.12481	1.24166	1.43586	0.0342635	0.215357
1500009L16Rik	856.623	-3.30192	2.22151e-72	3.95121e-70	94.512	8.60423	98.4929	90.5311	8.65635	8.55211
Gbp3	170.949	-3.29848	2.58317e-19	5.01916e-18	8.10333	0.737041	8.23247	7.97418	0.81591	0.658172
Pdzd7	56.8531	-3.29819	1.70663e-07	1.10472e-06	1.62981	0.150436	1.69845	1.56116	0.101678	0.199194
Fzd2	124.277	-3.29485	1.25781e-14	1.68695e-13	5.15578	0.473102	4.7549	5.55666	0.441577	0.504628
Pax7	64.2247	-3.29431	8.31506e-08	5.58897e-07	1.64799	0.14958	1.26954	2.02645	0.195109	0.104052
A930011G23Rik	46.8025	-3.28351	1.35455e-06	7.78909e-06	2.0995	0.193329	1.95623	2.24276	0.204707	0.181951
Cracdl	416.829	-3.28288	4.27098e-41	2.75848e-39	10.7514	0.993943	10.5154	10.9874	0.941661	1.04622
Gtf2a1l	35.0364	-3.27405	3.55745e-05	0.000163757	3.09413	0.287627	3.76173	2.42653	0.268461	0.306793
Mgst2	26.773	-3.27215	0.000408873	0.00157095	2.31209	0.219332	2.33161	2.29257	0.0877373	0.350928
Col6a4	108.869	-3.26848	5.26366e-12	5.69253e-11	2.1394	0.201758	2.05451	2.22429	0.129758	0.273758
Foxj1	63.4949	-3.26009	1.36871e-07	8.96272e-07	3.4545	0.32413	2.37983	4.52916	0.332046	0.316215
Fmn2	121.326	-3.2597	1.04516e-10	9.84766e-10	2.80531	0.26262	4.00573	1.6049	0.25761	0.26763
Heph	70.1124	-3.25835	5.12534e-07	3.12028e-06	1.7769	0.163454	1.65233	1.90147	0.282832	0.044075
Ndrg2	284.035	-3.25816	1.37077e-28	4.65416e-27	7.61629	0.71809	7.25364	7.97894	0.626648	0.809533
Epg5	581.165	-3.24698	6.06771e-44	4.33017e-42	3.59541	0.341401	3.11074	4.08007	0.305226	0.377576
4833422M21Rik	23.2766	-3.24005	0.00102151	0.00362316	2.55873	0.247494	3.07847	2.03899	0.111777	0.383211
Rtl5	29.476	-3.23949	0.000691618	0.00254441	1.01179	0.098819	0.693887	1.32969	0.0175132	0.180125
Gm36367	74.0597	-3.23881	2.59329e-09	2.10467e-08	10.8492	1.03131	12.0112	9.68716	1.04198	1.02065
Magee2	30.9038	-3.23851	0.000205575	0.000830277	2.00011	0.188222	1.33691	2.66331	0.263515	0.112928
Shisa5	686.419	-3.23825	2.13826e-55	2.38844e-53	36.4829	3.46278	34.9151	38.0508	3.83735	3.08822
Phlda1	369.685	-3.23527	4.11595e-32	1.69945e-30	28.3721	2.72306	26.0082	30.736	2.18746	3.25866
Gm19470	43.9371	-3.23309	8.08509e-05	0.000352391	4.19196	0.390455	5.23575	3.14817	0.725627	0.0552825
Rhebl1	1012	-3.22771	1.00207e-77	2.12567e-75	118.98	11.4235	114.832	123.129	10.9495	11.8976
Dmrt2	502.561	-3.22278	1.40047e-40	8.77555e-39	30.6855	2.95179	35.2254	26.1456	2.88756	3.01601
Tbx3os2	17.1482	-3.2213	0.00376371	0.0118449	1.89952	0.185391	1.96299	1.83605	0.112851	0.25793
Gm26641	269.118	-3.21415	2.85178e-24	7.64065e-23	42.0871	4.1009	46.2489	37.9252	3.10565	5.09614
Fam43b	135.938	-3.20718	7.96451e-14	1.0003e-12	8.59117	0.844842	8.31583	8.86651	0.547904	1.14178
Fam13c	338.379	-3.20412	1.61585e-32	6.8933e-31	7.64114	0.7467	7.16518	8.11711	0.690802	0.802597
Bmp4	264.823	-3.19986	4.80778e-23	1.20309e-21	19.2242	1.88424	15.3959	23.0526	1.77844	1.99003
Elfn1	106.479	-3.19855	7.1075e-12	7.59426e-11	2.82949	0.278984	2.51635	3.14262	0.216996	0.340972
Hspb9	16.6459	-3.1924	0.00420345	0.0130459	3.85074	0.378983	4.32984	3.37163	0.353729	0.404237
Tagln2	3344.58	-3.19221	8.32595e-154	7.7005e-151	361.968	35.5955	357.351	366.586	34.6661	36.5249
6430710C18Rik	66.497	-3.19028	4.40145e-08	3.07185e-07	4.8404	0.476815	5.87763	3.80317	0.445042	0.508588
Gm30188	54.5997	-3.18973	8.24913e-07	4.89444e-06	2.3974	0.233574	2.05623	2.73857	0.313572	0.153577
Irs4	117.234	-3.18925	2.62395e-11	2.64592e-10	2.81201	0.273846	3.46896	2.15506	0.366298	0.181393
A930024E05Rik	29.9628	-3.18912	0.000237976	0.000950999	2.36224	0.229916	1.7886	2.93589	0.321889	0.137944
Esrrg	76.2424	-3.18315	5.80422e-09	4.54163e-08	1.32446	0.129768	1.23325	1.41566	0.168386	0.0911505
Igsf21	669.22	-3.17994	3.45231e-50	3.20579e-48	46.0512	4.58341	48.6384	43.4641	3.82843	5.3384
Hexb	508.132	-3.17892	6.72135e-43	4.5844e-41	39.8581	3.97013	41.0981	38.6181	3.36386	4.5764
Setd1b	706.683	-3.1788	5.01634e-07	3.05553e-06	11.7146	1.16787	11.6544	11.7749	0.643206	1.69254
Dhrs2	16.9087	-3.17877	0.00608069	0.0181533	1.86423	0.189	2.28509	1.44338	0.0563008	0.321699
Tmem232	318.656	-3.17688	9.93509e-27	3.08762e-25	15.421	1.54371	14.5053	16.3368	1.13751	1.9499
Lyve1	111.648	-3.17504	1.11195e-12	1.27722e-11	6.39995	0.63331	6.2212	6.5787	0.731565	0.535054
Mdh1b	30.4379	-3.17241	0.00015478	0.000640105	2.65504	0.267508	2.62828	2.6818	0.178346	0.35667
Esr1	279.17	-3.17209	1.09108e-19	2.16549e-18	4.43785	0.437474	4.47627	4.39943	0.624643	0.250305
Pbx1	168.258	-3.1719	3.80214e-17	6.20855e-16	2.63466	0.26456	2.71352	2.55579	0.199999	0.329121
Tnfsf12	109.632	-3.16979	1.36877e-12	1.56367e-11	9.6659	0.968198	10.1399	9.19186	0.855646	1.08075
Gpr156	59.1044	-3.16766	3.93756e-07	2.43109e-06	1.73216	0.171016	1.60515	1.85916	0.239428	0.102605
AI467606	58.9934	-3.1659	5.47913e-06	2.87667e-05	3.99644	0.408661	3.75308	4.2398	0.104029	0.713294
Nrros	234.139	-3.16442	3.18777e-20	6.54596e-19	5.34466	0.540469	4.88616	5.80316	0.373673	0.707265
Mc5r	59.721	-3.14961	2.68759e-05	0.00012646	1.87681	0.185608	2.07709	1.67653	0.352886	0.0183306
Gfra2	170.292	-3.14562	6.39157e-18	1.11368e-16	7.28014	0.742253	7.46303	7.09726	0.634454	0.850053
Upk1a	13.7197	-3.1401	0.0125503	0.0344929	1.56257	0.162465	1.85994	1.26521	0.0583239	0.266607
2510009E07Rik	261.485	-3.13896	4.51564e-21	9.90613e-20	7.55037	0.762903	7.39496	7.70577	1.01933	0.50647
Egr1	8669.73	-3.13748	6.13338e-161	6.16591e-158	420.75	42.9105	453.414	388.085	44.5011	41.3199
Rbms2	1098.4	-3.1374	1.91252e-69	3.07093e-67	29.0521	2.97645	29.4335	28.6707	2.53254	3.42036
Cflar	173.18	-3.13618	2.49326e-16	3.85099e-15	2.82566	0.291468	2.67475	2.97657	0.200691	0.382245
Acy3	705.255	-3.13201	2.79295e-56	3.18121e-54	81.6572	8.38102	77.5047	85.8096	7.9491	8.81295
Prag1	58.9623	-3.13091	3.80971e-07	2.35845e-06	1.82668	0.188442	1.44371	2.20965	0.158933	0.217951
Ssh3	401.778	-3.12499	7.13499e-36	3.56318e-34	21.3659	2.19242	22.1874	20.5445	2.42399	1.96086
Clip4	160.778	-3.12278	1.80269e-16	2.81444e-15	4.26324	0.437353	4.6576	3.86888	0.502339	0.372367
Vsig10	865.8	-3.12057	1.96224e-57	2.27994e-55	26.5811	2.75651	25.0607	28.1016	2.3461	3.16693
Wipi1	1053.57	-3.11983	3.16223e-75	6.3032e-73	86.2906	8.90665	83.9456	88.6356	9.32077	8.49253
Efhc1	462.381	-3.11891	8.22067e-42	5.44637e-40	29.2249	3.01948	29.9581	28.4918	3.07742	2.96154
2810403D21Rik	99.4616	-3.11828	2.30859e-10	2.11236e-09	14.753	1.5127	17.6051	11.9008	1.8977	1.12771
Glb1l3	380.1	-3.11515	3.44433e-29	1.21588e-27	20.186	2.10142	23.2236	17.1484	1.71463	2.4882
Gm11538	84.5483	-3.11379	5.4656e-10	4.81614e-09	6.46734	0.672362	6.74672	6.18795	0.627559	0.717165
Rasl11a	837.706	-3.11346	1.76472e-64	2.5033e-62	110.649	11.4834	106.261	115.038	11.5854	11.3815
Amph	65.9503	-3.10874	4.59717e-08	3.19677e-07	1.49552	0.156325	1.3725	1.61855	0.1397	0.172951
Gm5529	23.4853	-3.10043	0.000952263	0.0033984	2.84079	0.296813	3.29648	2.3851	0.310112	0.283514
Lrriq4	159.838	-3.09532	7.49817e-16	1.11136e-14	7.04569	0.743328	8.02363	6.06775	0.633468	0.853189
Pakap	643.015	-3.08977	1.04341e-52	1.0399e-50	6.05532	0.638228	5.90929	6.20134	0.662781	0.613674
Pdk1	3703.67	-3.08807	1.40913e-81	3.39395e-79	84.8154	8.98684	86.7168	82.9139	7.08284	10.8908
Gm52280	25.9686	-3.08626	0.000652248	0.00241315	4.71462	0.498987	6.03092	3.39832	0.465736	0.532237
Mbnl2	1065.79	-3.08414	1.08285e-66	1.60498e-64	26.1109	2.77166	28.1943	24.0274	2.47957	3.06376
Irs1	65.5165	-3.07766	4.16223e-07	2.5622e-06	1.05862	0.114175	0.844781	1.27245	0.0666049	0.161745
Adgrl2	1066.05	-3.07743	8.68439e-72	1.50978e-69	20.581	2.19574	20.1119	21.0501	1.98588	2.4056
Epha2	689.067	-3.07556	8.67122e-52	8.354e-50	24.5063	2.61664	22.6875	26.3251	2.45204	2.78124
Cers4	110.381	-3.07139	2.85087e-12	3.15548e-11	2.02233	0.21602	2.1123	1.93235	0.216699	0.21534
Tapbp	2525.67	-3.0687	2.17241e-93	6.97644e-91	34.0603	3.65441	36.3847	31.7359	3.16304	4.14579
Cd74	738.537	-3.06474	0.00901162	0.025737	77.5981	8.35616	116.495	38.7009	2.91133	13.801
Gngt2	72.5302	-3.06435	4.5494e-08	3.16921e-07	7.96797	0.86439	8.79846	7.13747	0.565512	1.16327
Cyp2u1	231.414	-3.06263	1.58423e-21	3.56503e-20	8.76541	0.947638	8.27714	9.25369	0.780436	1.11484
Cbr3	172.456	-3.05923	1.88436e-16	2.93797e-15	21.8846	2.3766	22.0469	21.7223	1.76501	2.98819
Fst	643.554	-3.05692	2.56428e-49	2.26303e-47	32.8947	3.55806	35.0932	30.6961	3.23676	3.87936
Ccdc51	83.0194	-3.05628	2.47041e-08	1.78559e-07	5.1254	0.561481	5.16694	5.08386	0.286437	0.836525
Gm47412	22.8447	-3.05568	0.00119022	0.00415716	3.29042	0.354791	3.51053	3.0703	0.370688	0.338894
Zhx2	63.667	-3.05212	2.00729e-07	1.28888e-06	1.83826	0.199532	2.21135	1.46518	0.178311	0.220753
Tmem63c	242.107	-3.05199	6.00252e-23	1.48598e-21	3.04146	0.330672	2.89704	3.18587	0.291372	0.369973
Rcsd1	104.751	-3.04896	3.82312e-11	3.78255e-10	3.79993	0.415549	3.61556	3.98431	0.318021	0.513078
St6galnac6	85.3676	-3.04492	9.98279e-08	6.62901e-07	4.6781	0.51759	3.82967	5.52654	0.226457	0.808724
1700017B05Rik	1131.4	-3.03865	1.94214e-09	1.60379e-08	27.3268	3.00054	22.2802	32.3734	2.08238	3.9187
Fbxo32	2828.14	-3.03741	6.01316e-131	3.61598e-128	30.1585	3.30228	30.292	30.0249	3.17315	3.43141
Slc12a5	183.416	-3.03687	1.78033e-11	1.82468e-10	4.38309	0.486614	3.99557	4.77061	0.197476	0.775752
Upb1	67.0677	-3.03421	1.87662e-06	1.05858e-05	3.256	0.363614	3.22318	3.28881	0.125391	0.601837
Gm3134	37.9799	-3.03314	4.59561e-05	0.000208148	2.251	0.248968	2.482	2.02	0.183457	0.314478
Nxnl2	108.878	-3.03192	2.83956e-11	2.8509e-10	5.1136	0.566367	5.01473	5.21248	0.412234	0.720499
Gm14634	15.6303	-3.02753	0.0164646	0.043783	1.38771	0.157365	1.50814	1.26728	0	0.314731
D5Ertd605e	41.4031	-3.02389	7.33271e-05	0.000322333	5.77499	0.625973	6.73348	4.81649	1.00567	0.246272
Was	129.851	-3.02242	1.0035e-13	1.24948e-12	9.15979	1.01484	8.8719	9.44769	0.94722	1.08247
Brwd3	997.957	-3.02234	3.63763e-67	5.46164e-65	11.5159	1.27627	11.7226	11.3092	1.14991	1.40262
Gm52191	25.7629	-3.02208	0.00196944	0.00657011	1.46446	0.165943	1.421	1.50793	0.0294093	0.302476
Pitpnc1	996.401	-3.0153	4.12877e-50	3.78831e-48	22.8413	2.54773	24.9627	20.72	2.02439	3.07107
Egr3	82.1759	-3.01419	2.67921e-06	1.47567e-05	2.9298	0.332148	2.6571	3.2025	0.0738148	0.590482
Ap3b2	97.1786	-3.01053	6.67746e-10	5.81969e-09	3.64018	0.408495	2.96009	4.32026	0.329578	0.487413
Tmem154	28.3719	-3.00678	0.00320304	0.0102322	1.24945	0.143475	1.08089	1.41801	0	0.286949
Pmaip1	5965.91	-2.99711	1.19343e-118	6.27146e-116	331.574	37.3643	346.301	316.846	32.6824	42.0463
Lzts2	822.208	-2.99458	2.49312e-37	1.31574e-35	24.741	2.80462	20.8932	28.5888	2.13555	3.47368
Grk3	164.331	-2.99393	2.4234e-15	3.45461e-14	3.4695	0.392111	2.90615	4.03285	0.371815	0.412407
Slc38a3	117.9	-2.99317	1.95117e-12	2.19644e-11	3.48462	0.394359	3.60625	3.36299	0.351767	0.436951
Six4	229.534	-2.99018	1.89138e-21	4.22946e-20	4.62507	0.522634	5.03629	4.21385	0.521161	0.524107
Krt28	24.982	-2.98587	0.00171845	0.00580688	2.47093	0.285433	2.92112	2.02075	0.102468	0.468397
Serpinb2	111.699	-2.9744	5.85088e-11	5.66991e-10	7.38441	0.845818	8.89682	5.872	0.752951	0.938686
Pced1b	1249.25	-2.97353	4.96912e-78	1.06385e-75	22.0518	2.5248	21.2401	22.8635	2.42488	2.62472
Gm34808	24.0075	-2.97076	0.00116695	0.00408325	1.14271	0.130324	1.19136	1.09405	0.14794	0.112709
Ptprb	115.28	-2.96607	7.08655e-10	6.15997e-09	1.31424	0.152883	1.47991	1.14857	0.0827799	0.222985
Chst5	119.192	-2.96452	1.23392e-10	1.15462e-09	9.04394	1.05036	7.08638	11.0015	0.749077	1.35163
Clstn3	251.079	-2.96104	3.95557e-23	9.96304e-22	9.07438	1.04427	9.111	9.03776	1.12463	0.963911
Pgc	24.5548	-2.95764	0.00193984	0.00648073	2.60622	0.307088	2.92967	2.28276	0.110242	0.503933
Tor3a	391.268	-2.95625	1.17582e-23	3.05475e-22	17.6033	2.02253	16.3549	18.8516	2.68454	1.36053
Arhgef10l	162.722	-2.95479	2.52764e-15	3.59877e-14	3.32099	0.385424	2.87877	3.76321	0.371049	0.399799
Abcc3	180.9	-2.9527	6.59242e-17	1.05561e-15	5.23942	0.606991	4.69479	5.78405	0.64676	0.567223
Best3	40.008	-2.95183	5.03756e-05	0.000227275	1.63627	0.187897	1.59907	1.67347	0.254575	0.121219
Pnliprp2	21.7611	-2.94992	0.00250999	0.00819949	2.03892	0.239778	2.3508	1.72704	0.145958	0.333599
Gm51750	53.271	-2.94946	4.85156e-06	2.56876e-05	2.65674	0.312898	2.65527	2.65821	0.181452	0.444345
Rbm20	75.377	-2.94736	3.95237e-08	2.78109e-07	1.45846	0.168466	1.58092	1.33601	0.210767	0.126166
Batf	179.293	-2.94381	1.02052e-16	1.61619e-15	29.116	3.41763	29.358	28.874	2.78484	4.05042
Cnrip1	31.4984	-2.93936	0.000484018	0.00183286	2.86075	0.340975	2.83192	2.88958	0.141799	0.540151
Gm39500	38.3131	-2.93891	6.6837e-05	0.000295771	5.17564	0.612122	5.29489	5.05638	0.421478	0.802766
A530072M11Rik	186.876	-2.93835	4.40567e-18	7.78212e-17	14.8141	1.73589	15.0468	14.5814	1.73006	1.74173
Slc45a1	64.25	-2.93714	2.4618e-07	1.56121e-06	1.78994	0.211126	1.70826	1.87163	0.173875	0.248377
Zscan5b	173.295	-2.9329	2.26869e-12	2.53292e-11	12.8241	1.49134	12.1506	13.4975	2.19173	0.790951
Gm42377	51.6251	-2.93285	3.92624e-06	2.10975e-05	13.447	1.57479	15.4239	11.4701	1.7584	1.39118
Gpld1	50.1496	-2.9315	9.03301e-05	0.000389812	1.12767	0.130058	1.15048	1.10486	0.233438	0.026677
Ptch2	438.108	-2.9292	4.89987e-06	2.59258e-05	12.5288	1.48596	8.51128	16.5463	1.01339	1.95854
Akap4	52.9911	-2.92782	1.8976e-05	9.14662e-05	2.58886	0.310481	2.997	2.18072	0.127104	0.493858
Ddah2	925.349	-2.92509	7.00421e-54	7.36142e-52	22.367	2.65481	20.9503	23.7838	2.29001	3.01961
Gm30581	193.457	-2.92356	1.25693e-17	2.12913e-16	31.5664	3.75599	30.1288	33.004	3.14325	4.36873
Slc9a3r1	2769.53	-2.92118	5.45066e-90	1.53695e-87	211.118	25.0957	195.043	227.193	22.3862	27.8052
Dop1b	858.505	-2.91955	5.85934e-40	3.51895e-38	9.75345	1.15812	7.76856	11.7383	1.21355	1.10269
Pnpla1	144.813	-2.91898	9.57579e-12	1.00779e-10	2.27875	0.267802	2.13593	2.42158	0.376567	0.159037
Fam160b1	291.655	-2.91872	7.12147e-25	1.97437e-23	7.06332	0.837677	7.74219	6.38445	0.869195	0.80616
Tgif1	626.496	-2.91737	1.05873e-44	7.84611e-43	21.8246	2.6033	21.0557	22.5935	2.30405	2.90256
Gm30513	17.9423	-2.91628	0.0141237	0.0382399	1.70311	0.196998	2.04649	1.35973	0.393997	0
Samd4	209.183	-2.91112	6.45551e-18	1.12313e-16	3.63853	0.434543	3.08413	4.19292	0.444271	0.424815
Tmem231	367.057	-2.90701	6.74809e-29	2.32533e-27	16.521	1.98113	14.7397	18.3023	1.9242	2.03805
Sspn	140.853	-2.90634	9.05365e-14	1.13259e-12	2.2513	0.268791	2.22861	2.27399	0.299722	0.23786
Slc16a14	100.622	-2.90603	1.52375e-09	1.27351e-08	3.77005	0.447234	3.75109	3.789	0.604683	0.289784
Gm35986	41.7037	-2.90052	2.90688e-05	0.000136031	9.04249	1.08979	9.39263	8.69235	1.01717	1.16241
Dalrd3	358.019	-2.8994	3.03837e-28	1.01964e-26	11.9368	1.4308	12.1218	11.7519	1.65049	1.21111
Aff1	561.741	-2.89569	2.41853e-40	1.48727e-38	9.34603	1.12462	9.14599	9.54606	1.25787	0.991363
F730043M19Rik	16.2446	-2.89463	0.00902951	0.0257757	1.5331	0.186197	1.85373	1.21248	0.147558	0.224837
Gramd1a	346.511	-2.8946	4.63865e-29	1.61772e-27	13.4706	1.63048	14.0076	12.9335	1.50021	1.76075
Gm904	22.8458	-2.89022	0.00203662	0.00676298	4.68519	0.564739	5.4723	3.89807	0.641072	0.488406
Cd2	46.9824	-2.88992	5.80378e-05	0.000259716	3.00306	0.369131	3.73761	2.2685	0.166712	0.57155
Rsph9	630.487	-2.88692	5.70714e-35	2.69307e-33	34.5445	4.21739	36.7501	32.3388	3.17388	5.26089
Sncaip	163.987	-2.88687	6.50759e-15	8.92459e-14	5.1041	0.623496	4.82259	5.38561	0.503924	0.743068
Coro1a	814.374	-2.88149	2.89272e-38	1.60013e-36	55.1661	6.76311	54.2993	56.0329	4.95374	8.57247
Dkk3	811.089	-2.87749	4.19461e-08	2.93992e-07	33.0264	4.04948	37.682	28.3707	2.635	5.46395
4933432K03Rik	30.0406	-2.8718	0.000660062	0.00243918	7.34603	0.912709	8.64403	6.04802	0.51114	1.31428
Sh3bp4	1946.95	-2.86625	4.90658e-73	9.00397e-71	49.8488	6.1308	46.0467	53.651	6.81474	5.44686
Igfbp6	696.206	-2.86609	3.82226e-50	3.53513e-48	78.8066	9.7227	77.8391	79.7741	9.23263	10.2128
Tbc1d30	194.918	-2.86577	0.00396495	0.0123972	1.94755	0.242021	1.6625	2.23259	0.0836659	0.400376
Gpsm3	2479.91	-2.86566	5.00981e-92	1.56536e-89	67.3678	8.31945	69.3572	65.3784	7.3561	9.2828
Gm4875	25.37	-2.86357	0.00184811	0.00621014	2.8103	0.352476	2.30028	3.32031	0.174173	0.530779
Galnt2	316.271	-2.86267	5.9318e-27	1.85847e-25	11.2289	1.38676	11.6411	10.8166	1.37355	1.39998
Tnfrsf1a	120.308	-2.85977	4.89649e-10	4.33448e-09	8.12624	1.0114	5.8156	10.4369	0.849607	1.17319
Sntg2	127.669	-2.85732	2.47104e-12	2.74954e-11	5.54525	0.684772	5.40066	5.68983	0.772418	0.597126
Fam169b	206.736	-2.85542	5.18388e-17	8.36439e-16	8.97332	1.12159	8.89398	9.05267	0.840823	1.40237
Btnl7-ps	602.779	-2.85516	8.87988e-39	5.12021e-37	1.29126	0.159624	1.35206	1.23047	0.184832	0.134415
Elovl6	729.052	-2.84889	1.46082e-43	1.02979e-41	17.8607	2.2314	19.8704	15.8509	1.98699	2.4758
Tns2	379.205	-2.84758	2.50228e-24	6.74332e-23	10.6196	1.32868	8.45609	12.7832	1.24797	1.40938
Gm30908	19.3404	-2.84747	0.0133452	0.0363791	1.46967	0.17852	1.64847	1.29087	0.35704	0
Pdzk1ip1	26.5107	-2.84383	0.00113012	0.00396819	3.4254	0.424722	3.85257	2.99823	0.540568	0.308877
Gm14261	18.2635	-2.84354	0.0087296	0.0249902	1.85299	0.236079	1.28793	2.41805	0.106621	0.365536
Camsap3	121.113	-2.83973	1.61648e-11	1.66191e-10	3.67952	0.464222	3.46362	3.89541	0.382314	0.546129
Oasl2	447.92	-2.8383	4.90274e-33	2.13889e-31	20.738	2.59969	19.3448	22.1312	2.81468	2.38471
Gm32273	92.8937	-2.8367	2.80883e-09	2.27242e-08	17.3546	2.1726	19.3754	15.3338	2.44512	1.90009
Stat6	91.8476	-2.83039	9.4967e-09	7.24935e-08	3.47881	0.443185	3.07492	3.88269	0.318196	0.568173
Ccdc3	158.631	-2.8278	0.00636588	0.0189047	2.93491	0.374252	3.05687	2.81294	0.11644	0.632064
2610037D02Rik	48.7463	-2.82739	1.40785e-05	6.93782e-05	1.95467	0.247611	2.33488	1.57447	0.231111	0.26411
Nap1l3	92.7339	-2.82388	1.36543e-07	8.94373e-07	4.7791	0.597736	5.11301	4.4452	0.917827	0.277645
Wdr95	33.0806	-2.82353	0.000265079	0.00105113	1.23651	0.156966	1.11871	1.35431	0.15697	0.156961
Lypd11	35.0153	-2.8229	0.000192243	0.000781203	2.76529	0.348876	3.00005	2.53054	0.413932	0.283821
Snap25	45.6536	-2.8181	4.10496e-05	0.000187172	2.57218	0.324621	3.16559	1.97877	0.413163	0.236079
Slc25a12	441.308	-2.81776	8.95783e-32	3.64012e-30	7.12065	0.90987	6.5277	7.71361	0.822119	0.997621
Gm5751	15.1564	-2.81644	0.0144925	0.0390918	4.40359	0.555799	3.39118	5.416	0.762876	0.348722
Ccdc180	168.228	-2.8081	1.71467e-15	2.47946e-14	4.7552	0.609917	4.69279	4.81762	0.608875	0.610959
Phf3	740.925	-2.8071	2.01255e-44	1.46796e-42	12.7136	1.6377	13.0783	12.3489	1.37951	1.8959
Dlx4	360.635	-2.8057	6.24983e-29	2.1633e-27	21.5228	2.76814	22.3618	20.6838	2.63385	2.90243
4930550C14Rik	113.905	-2.8038	7.1682e-10	6.22158e-09	3.36283	0.428698	3.14728	3.57837	0.573824	0.283571
9430018G01Rik	547.802	-2.80274	4.19473e-35	2.00809e-33	19.4305	2.50292	22.0714	16.7895	2.36594	2.6399
Sectm1a	22.9692	-2.80219	0.00993834	0.0281232	1.47464	0.185001	1.75527	1.194	0.370002	0
Fthl17-ps2	40.8385	-2.8019	0.000123858	0.000521649	7.07289	0.901679	8.95186	5.19392	1.18064	0.622717
Serpinb10	70.6938	-2.80134	7.8216e-07	4.64912e-06	1.9289	0.250983	2.23146	1.62635	0.157767	0.344198
Kcng2	45.6542	-2.79284	2.39972e-05	0.000113888	2.21842	0.288419	2.39563	2.04121	0.25557	0.321268
4933430H16Rik	31.0826	-2.79241	0.000995151	0.00353509	3.1265	0.412447	3.32769	2.92531	0.158933	0.665962
Gm6329	203.347	-2.79034	5.14673e-18	9.06342e-17	34.2042	4.44386	34.637	33.7715	4.33653	4.55118
Gm50265	19.8998	-2.78656	0.00768251	0.02233	1.61157	0.2138	1.15706	2.06608	0.0855242	0.342076
Fign	176.742	-2.78543	5.68716e-14	7.21726e-13	2.56862	0.337276	2.68467	2.45257	0.237251	0.437301
Ecm1	163.138	-2.78532	1.78983e-14	2.36483e-13	10.4645	1.35923	11.3141	9.61488	1.48459	1.23387
Gm11346	48.8986	-2.78524	2.62889e-05	0.000123925	6.36171	0.82028	7.39855	5.32488	1.09373	0.546831
Sema4c	164.524	-2.7849	3.94854e-14	5.06648e-13	3.2346	0.423246	2.85314	3.61606	0.372943	0.473549
Cdh5	105.667	-2.78069	8.3203e-10	7.16774e-09	3.78465	0.496338	3.17512	4.39417	0.453194	0.539483
Pianp	345.688	-2.77933	8.01793e-26	2.34672e-24	16.7904	2.18836	16.5088	17.0719	2.50626	1.87045
Pdpn	354.091	-2.7783	9.43018e-22	2.15672e-20	13.9449	1.83704	15.3937	12.4961	1.32746	2.34662
Dll4	267.24	-2.77694	0.000290031	0.00114245	11.1874	1.4763	6.9641	15.4107	0.906344	2.04625
Pip4k2a	217.631	-2.77393	1.4147e-14	1.88534e-13	4.63286	0.614071	4.76146	4.50426	0.381606	0.846536
Polr3gl	1128.7	-2.77254	1.7524e-60	2.23861e-58	93.8488	12.3305	102.414	85.2836	12.3497	12.3114
Bicc1	522.828	-2.77211	4.07488e-38	2.22216e-36	13.7501	1.81103	13.5439	13.9564	1.70514	1.91692
Gm41640	185.863	-2.76992	9.68431e-15	1.31409e-13	6.41349	0.838705	6.44644	6.38054	1.05425	0.623162
Nrd1	4653.96	-2.76936	6.0991e-131	3.61598e-128	149.183	19.644	149.304	149.062	20.3265	18.9615
4930412C18Rik	336.383	-2.76893	6.02504e-22	1.3959e-20	12.2665	1.62547	13.5406	10.9924	1.23014	2.02081
Bdh2	15.2086	-2.76712	0.0156609	0.0418577	1.87482	0.251057	1.82416	1.92549	0.130184	0.37193
Mib2	349.97	-2.76357	4.07406e-23	1.02503e-21	11.9894	1.5954	10.8712	13.1077	1.24795	1.94285
Lasp1	1374.55	-2.75965	7.84364e-49	6.74203e-47	51.3541	6.82597	42.4097	60.2985	6.41321	7.23873
Oasl1	186.393	-2.75911	2.48517e-14	3.26118e-13	11.7127	1.56496	10.2337	13.1917	1.19511	1.93481
Parva	271.192	-2.75295	3.51159e-22	8.23479e-21	8.36961	1.11749	8.158	8.58122	1.04303	1.19196
Pcca	119.839	-2.74844	2.80493e-11	2.81995e-10	1.47037	0.196209	1.46503	1.4757	0.207321	0.185096
Rnf122	657.838	-2.74696	7.14186e-45	5.3615e-43	17.161	2.29393	17.0822	17.2399	2.38356	2.20431
Upf3b	178.068	-2.74581	2.62641e-11	2.64725e-10	4.5267	0.611823	5.2936	3.75979	0.349081	0.874566
Hs3st1	304.476	-2.7457	1.51767e-23	3.91211e-22	18.3966	2.47243	17.7437	19.0496	2.17143	2.77342
Ccdc69	50.449	-2.74521	1.88734e-05	9.10853e-05	4.02677	0.539769	3.14141	4.91214	0.548832	0.530705
Tnfaip8l3	31.5206	-2.74368	0.000512027	0.00192913	1.98171	0.265918	1.73462	2.22881	0.265926	0.26591
Tmem30b	566.803	-2.74219	1.26068e-38	7.2152e-37	24.9369	3.34043	24.731	25.1429	3.6261	3.05477
Cdc42ep3	1064.34	-2.74179	1.50257e-35	7.36068e-34	64.2481	8.65257	49.1475	79.3488	7.92267	9.38248
H1f5	22.7027	-2.73974	0.00364183	0.0115036	4.12973	0.549019	3.80676	4.4527	0.768641	0.329397
Pou6f2	14.9589	-2.73968	0.0175028	0.0461775	1.01958	0.139054	1.11488	0.924281	0.0721055	0.206003
Zkscan4	28.6921	-2.73681	0.0016555	0.00562011	1.68473	0.223903	1.34966	2.0198	0.341401	0.106404
Slc44a4	302.223	-2.72417	1.11258e-20	2.35147e-19	4.60176	0.629362	4.75998	4.44354	0.475639	0.783085
4833412C05Rik	29.131	-2.72339	0.000893354	0.00320847	3.87929	0.52829	4.42463	3.33395	0.493087	0.563493
Helb	1087.62	-2.72248	8.64225e-59	1.04076e-56	33.7634	4.58853	32.5409	34.986	4.91383	4.26324
Gm9655	543.616	-2.72037	1.32187e-35	6.51692e-34	9.70148	1.32277	10.6776	8.72534	1.27492	1.37063
Pitpnm1	734.204	-2.71776	4.02593e-06	2.16131e-05	10.0408	1.37802	7.75902	12.3225	0.899378	1.85667
Orai1	82.5086	-2.71663	3.08691e-06	1.68537e-05	4.85521	0.653353	5.23144	4.47898	1.05782	0.248884
Hebp1	100.184	-2.71613	1.68654e-08	1.24429e-07	10.1003	1.39088	7.90978	12.2909	1.06995	1.71182
Prr15	60.4976	-2.71595	2.87521e-06	1.57612e-05	2.83788	0.390603	2.93059	2.74516	0.29829	0.482915
Twist1	108.874	-2.71577	2.37803e-09	1.93813e-08	9.61248	1.31043	7.73394	11.491	1.49767	1.12318
Slc38a4	467.659	-2.71305	1.55604e-33	6.94569e-32	15.5443	2.13378	15.3877	15.701	1.9728	2.29475
Abr	4087.1	-2.71158	1.42666e-80	3.36604e-78	54.2036	7.44858	48.4679	59.9393	6.71595	8.1812
Trim9	226.005	-2.71095	1.71646e-15	2.4805e-14	3.72017	0.507144	3.34637	4.09396	0.64547	0.368817
Nid2	3196.91	-2.70784	5.95702e-61	7.78182e-59	94.118	12.9774	81.1628	107.073	11.1214	14.8335
A930006K02Rik	104.447	-2.70394	2.7345e-08	1.96724e-07	19.3098	2.68942	21.6994	16.9202	1.5689	3.80994
Zfp92	98.0995	-2.70231	5.80226e-08	3.97747e-07	2.00465	0.279887	1.79373	2.21557	0.162822	0.396951
Rcn3	644.367	-2.70198	1.08404e-40	6.82977e-39	59.3209	8.18389	55.3145	63.3273	8.49811	7.86968
Cfap61	369.459	-2.69709	5.55387e-24	1.46427e-22	10.2046	1.40747	11.4593	8.94988	1.61037	1.20457
Asgr2	65.143	-2.69521	1.17742e-06	6.83682e-06	3.24073	0.448427	3.59429	2.88716	0.474819	0.422035
Gm4371	97.0469	-2.69229	5.97839e-09	4.66685e-08	8.66899	1.1981	8.97476	8.36322	1.42151	0.974688
Slc35f4	26.4342	-2.68988	0.00159487	0.00543421	1.88583	0.262437	1.86682	1.90483	0.265151	0.259723
Gjb2	1026.16	-2.68666	1.87493e-49	1.67383e-47	61.2809	8.5791	58.5415	64.0203	7.33046	9.82774
Cntnap1	61.2879	-2.68369	4.64984e-06	2.47157e-05	1.25682	0.176524	1.50451	1.00912	0.141535	0.211512
Fryl	550.154	-2.68146	5.7754e-36	2.89045e-34	6.11824	0.854499	6.13154	6.10493	0.939342	0.769656
Wdr19	849.644	-2.68068	2.77871e-51	2.63317e-49	20.599	2.88647	19.7877	21.4104	2.88656	2.88638
Fam131a	252.476	-2.67455	2.12693e-16	3.30059e-15	10.4637	1.48162	8.80731	12.12	1.14751	1.81573
Tslrn1	287.436	-2.66156	8.34093e-20	1.66978e-18	52.972	7.48009	53.4431	52.5009	9.02116	5.93903
Gm12576	43.7707	-2.66044	9.02695e-05	0.000389623	3.9689	0.562496	3.22151	4.71628	0.62808	0.496912
Gm31206	17.5945	-2.65752	0.0133315	0.0363573	1.46311	0.205088	1.75019	1.17603	0.309214	0.100962
Grm3	119.286	-2.6519	4.37306e-10	3.89799e-09	4.83491	0.690364	5.69171	3.9781	0.690386	0.690343
Plb1	426.193	-2.65052	2.57719e-30	9.68939e-29	11.0505	1.58306	11.2965	10.8044	1.49231	1.67381
Ksr2	72.5175	-2.64376	1.30295e-06	7.51106e-06	1.37364	0.196334	1.12305	1.62422	0.242536	0.150132
Dync2li1	507.695	-2.64251	1.50173e-31	6.00742e-30	53.5784	7.73706	53.8627	53.294	6.53089	8.94323
Lbh	418.765	-2.64234	3.05084e-29	1.08027e-27	19.5222	2.81504	19.9201	19.1243	2.56115	3.06893
B4galt1	1770.33	-2.64195	1.33811e-70	2.20998e-68	59.2714	8.54911	58.2382	60.3046	7.62697	9.47125
Tmco4	249.376	-2.64145	5.12242e-17	8.28256e-16	5.5359	0.801758	4.99417	6.07762	0.628223	0.975294
Arap1	314.534	-2.63947	3.32439e-13	3.98479e-12	6.10339	0.888266	4.75103	7.45575	0.508238	1.26829
Cxcr4	149.078	-2.63921	2.22074e-12	2.48417e-11	11.5856	1.6634	11.8531	11.3181	1.90615	1.42065
Peli2	923.837	-2.63773	6.83882e-52	6.6162e-50	18.9594	2.73737	20.1414	17.7775	2.66005	2.81469
LOC102637792	42.7227	-2.63277	0.000130849	0.000548294	3.87623	0.556655	3.69542	4.05704	0.726088	0.387223
D130043K22Rik	58.8113	-2.63275	5.08509e-06	2.68197e-05	1.63414	0.236129	1.73344	1.53485	0.252019	0.220238
Gm35541	496.58	-2.63042	2.10359e-29	7.58801e-28	46.748	6.77621	53.4831	40.0129	6.78	6.77241
Helz	4450.83	-2.62746	6.1601e-91	1.80296e-88	47.7696	6.95715	47.2434	48.2958	6.11746	7.79684
Foxa3	23.5556	-2.62544	0.00395272	0.0123657	1.64725	0.240512	1.26545	2.02905	0.224485	0.256539
Spag6l	98.8442	-2.61971	1.61307e-08	1.19351e-07	5.72845	0.833034	6.60681	4.8501	0.959009	0.707059
Thnsl2	344.43	-2.6186	3.88249e-23	9.78965e-22	23.5509	3.44282	20.9218	26.18	3.58398	3.30166
Ctdsp1	1119.92	-2.61685	1.19096e-53	1.23486e-51	57.5322	8.43643	52.7946	62.2697	8.07945	8.79341
Xlr3d-ps	82.4066	-2.61484	2.02949e-07	1.30241e-06	1.32137	0.194998	1.16978	1.47296	0.154533	0.235464
Gm52731	17.5994	-2.61121	0.0140445	0.0380477	2.12516	0.314538	1.3768	2.87352	0.259041	0.370036
Abca1	2651.99	-2.61051	2.68303e-86	6.89299e-84	35.9196	5.28947	33.8134	38.0257	5.04525	5.53369
Pald1	2577.7	-2.60989	6.12436e-51	5.73309e-49	81.3503	12.0014	66.8767	95.8238	10.7509	13.2519
Irgm1	117.28	-2.60934	6.20651e-10	5.43793e-09	1.72959	0.255982	1.75454	1.70464	0.205244	0.306719
Smpdl3a	65.9249	-2.60535	2.569e-06	1.42038e-05	5.25058	0.775811	6.13314	4.36802	0.724115	0.827508
Npr2	220.788	-2.5951	3.68197e-17	6.01657e-16	4.63216	0.688145	4.48672	4.7776	0.70824	0.668049
Marveld3	37.7055	-2.59331	0.000561828	0.00210102	1.67534	0.246524	1.42612	1.92456	0.35704	0.136007
Tmem164	665.861	-2.59222	3.08415e-32	1.28954e-30	12.5908	1.87959	10.6072	14.5743	1.76517	1.99402
Sphk1	792.071	-2.5917	2.70362e-38	1.49911e-36	26.3435	3.93633	23.3439	29.343	3.55034	4.32232
Slc35f3	292.185	-2.591	7.02358e-19	1.31391e-17	3.51884	0.527493	3.24056	3.79711	0.419979	0.635006
Upk3bl	23.182	-2.58669	0.00604827	0.0180716	1.86968	0.281893	1.1735	2.56585	0.216849	0.346937
Grhl2	1108.78	-2.5854	1.91771e-38	1.07887e-36	26.4185	3.94109	30.712	22.1249	4.45447	3.42771
Egr4	551.764	-2.58276	1.01016e-34	4.70907e-33	36.5436	5.46925	37.7873	35.2998	5.82457	5.11394
Parp9	248.632	-2.57863	2.0467e-18	3.69429e-17	8.99299	1.35634	8.98765	8.99834	1.20383	1.50885
Plaur	73.1631	-2.57843	1.2198e-06	7.0581e-06	6.05871	0.918211	5.8891	6.22832	0.667238	1.16918
Fli1	100.192	-2.57548	8.75208e-06	4.45347e-05	3.37471	0.516409	2.85429	3.89512	0.163085	0.869733
Hap1	1049.77	-2.57512	1.48045e-08	1.10209e-07	33.8295	5.11986	28.4341	39.2249	3.68882	6.5509
Flnc	290.222	-2.57308	1.65474e-20	3.46567e-19	4.49587	0.678815	4.11752	4.87423	0.682402	0.675227
Olfr455	31.9254	-2.57179	0.000974731	0.00346913	4.75867	0.713965	5.02293	4.49441	0.879626	0.548305
Mmp14	255.138	-2.57008	1.46229e-18	2.66228e-17	9.53075	1.44645	9.54245	9.51905	1.26444	1.62847
Arid2	1182.81	-2.57001	5.2941e-60	6.65273e-58	18.6102	2.8159	19.3999	17.8204	2.75443	2.87737
Plekhh3	106.885	-2.56811	7.68049e-07	4.5734e-06	4.19414	0.64379	4.07976	4.30853	0.274416	1.01316
4930563M20Rik	20.7865	-2.56769	0.00759523	0.022118	5.28318	0.800742	4.09562	6.47073	0.820297	0.781187
Gm35768	50.1331	-2.56677	9.95769e-05	0.00042669	1.15072	0.172593	1.00074	1.30071	0.246566	0.0986204
Amotl2	492.611	-2.56553	1.48492e-28	5.03435e-27	14.3654	2.18853	13.5471	15.1836	1.85035	2.52671
Gm41625	19.4045	-2.56454	0.0135693	0.0368858	1.55816	0.240662	1.75328	1.36303	0.0863959	0.394928
Nfil3	328.756	-2.56419	5.69345e-15	7.85465e-14	9.20956	1.41068	8.02775	10.3914	0.874443	1.94691
Fbxo41	685.148	-2.55698	5.25887e-27	1.65436e-25	14.5341	2.23095	13.0778	15.9904	1.65594	2.80596
Trarg1	99.6408	-2.55653	3.12107e-07	1.9557e-06	4.36496	0.673324	4.94208	3.78784	0.377078	0.969569
Gm30107	28.8108	-2.55637	0.00299117	0.00962049	4.48539	0.693817	5.50279	3.46799	0.334962	1.05267
E130102H24Rik	23.0579	-2.55495	0.00735177	0.0215092	4.37066	0.677464	5.32212	3.4192	0.305966	1.04896
Pheta1	937.28	-2.54676	2.51222e-33	1.11493e-31	55.9444	8.62728	45.6133	66.2756	7.65772	9.59683
Zfp449	1075.98	-2.54599	1.33341e-53	1.37638e-51	40.7618	6.2748	43.0779	38.4456	5.95455	6.59504
Morn4	537.571	-2.54489	3.4299e-32	1.42894e-30	39.6595	6.09602	37.3982	41.9208	6.51623	5.67581
Spry1	881.883	-2.54397	6.88824e-47	5.49207e-45	50.1032	7.73298	50.3599	49.8465	7.03817	8.42779
Sh3bp1	1280.46	-2.54298	2.223e-40	1.37067e-38	69.6122	10.7701	61.4013	77.8231	8.88019	12.6601
Gcnt2	188.217	-2.54294	3.30709e-14	4.27904e-13	2.02414	0.312102	1.83687	2.21141	0.312939	0.311264
Ankrd13d	554.821	-2.53895	1.43619e-26	4.39756e-25	25.6017	3.97786	25.6714	25.5319	3.00972	4.946
Ccdc125	346.661	-2.53704	2.90386e-21	6.4375e-20	13.9887	2.17583	13.7097	14.2678	1.74073	2.61094
Cfap45	113.169	-2.53623	4.28353e-08	2.9986e-07	8.79282	1.37269	10.2368	7.34883	0.879275	1.8661
Pcp4	24.2365	-2.53358	0.00409502	0.0127505	5.34665	0.833064	5.06043	5.63287	0.714081	0.952048
Slc9b2	144.735	-2.53273	9.49499e-12	1.0002e-10	3.56502	0.554001	3.56798	3.56206	0.531251	0.576751
Gcnt4	232.71	-2.53234	6.97274e-17	1.11419e-15	4.4758	0.697231	4.45094	4.50065	0.612044	0.782419
Pak6	213.086	-2.53177	1.97677e-10	1.81882e-09	5.93015	0.919562	8.34716	3.51313	0.898206	0.940919
Foxk1	285.416	-2.53137	1.45376e-18	2.65094e-17	5.40204	0.843345	5.06346	5.74062	0.694545	0.992146
6330403K07Rik	361.779	-2.52885	1.20483e-22	2.91402e-21	16.0214	2.48409	16.8618	15.181	2.8405	2.12768
Tgfbr3	766.544	-2.52838	1.09642e-34	5.10087e-33	17.8141	2.77725	20.349	15.2791	2.50534	3.04917
Jsrp1	313.425	-2.51959	2.03797e-19	3.9799e-18	27.7631	4.36938	29.2574	26.2689	3.49153	5.24722
Hoxb13	105.218	-2.51535	2.63868e-08	1.90067e-07	10.8688	1.69559	11.8471	9.89044	2.11755	1.27364
Hlx	124.239	-2.51518	3.64185e-09	2.90971e-08	8.15385	1.2906	7.06681	9.2409	0.958476	1.62272
Zbtb16	10594.2	-2.50728	3.87607e-87	1.00699e-84	191.995	30.3774	171.325	212.666	28.4682	32.2866
Dynlrb2	48.8533	-2.50651	7.86241e-05	0.000343852	13.3869	2.10553	12.1676	14.6063	2.51823	1.69282
Ramp3	421.446	-2.50497	6.78394e-27	2.11971e-25	42.5387	6.7196	41.8703	43.2071	7.20312	6.23608
Mmp19	49.246	-2.5046	6.53255e-05	0.000289637	2.01186	0.318486	2.28246	1.74126	0.309035	0.327936
Mcam	3635.34	-2.50235	2.94977e-77	6.20041e-75	167.079	26.5413	160.274	173.884	23.4731	29.6095
Rasgrp3	38.6295	-2.50157	0.00254597	0.00830179	1.09997	0.171141	1.29127	0.908665	0.307178	0.0351039
Atg9a	556.93	-2.50122	1.2417e-22	3.00007e-21	17.8471	2.84899	16.4309	19.2632	2.02994	3.66804
Fam149a	63.8656	-2.50058	5.39896e-06	2.83651e-05	1.64114	0.261128	1.70601	1.57627	0.236314	0.285942
Cdh4	410.045	-2.49991	8.05426e-21	1.73077e-19	8.22681	1.31338	8.80081	7.65281	0.976933	1.64983
Grasp	92.9891	-2.49789	2.49472e-06	1.38295e-05	4.87668	0.785073	5.13249	4.62088	0.369225	1.20092
Fahd1	396.695	-2.49699	2.0935e-20	4.33745e-19	39.7233	6.35899	39.3494	40.0972	4.66292	8.05505
Rasgrp2	1902.98	-2.49463	2.37053e-73	4.52986e-71	24.0527	3.83054	23.7936	24.3118	4.00217	3.6589
Lrrc20	684.033	-2.49454	1.33631e-34	6.16729e-33	29.6704	4.746	29.2797	30.0611	4.01637	5.47562
Tagln3	28.7538	-2.4944	0.00215629	0.00713784	3.4876	0.552863	3.67655	3.29866	0.655955	0.44977
Ephb1	186.822	-2.49318	1.20859e-12	1.38479e-11	5.64819	0.896681	6.44488	4.85149	1.04616	0.747207
Ggt7	721.359	-2.49031	1.14625e-30	4.42465e-29	36.1407	5.80364	36.6639	35.6175	4.50507	7.10221
Cul9	319.139	-2.48732	9.10995e-19	1.69734e-17	5.24624	0.840993	4.37556	6.11692	0.846749	0.835237
Pnpla7	3067.05	-2.48634	1.78092e-60	2.26256e-58	84.6172	13.6009	80.787	88.4474	11.3788	15.823
Gm30866	41.7894	-2.48607	0.000247411	0.000985469	1.91401	0.308529	1.94319	1.88484	0.248251	0.368808
Ptpn9	136.864	-2.48444	2.1671e-09	1.77498e-08	4.75672	0.757514	5.37872	4.13472	0.977805	0.537222
Lratd2	221.772	-2.48209	4.68122e-14	5.97017e-13	4.73358	0.76589	4.40895	5.05821	0.578989	0.952792
Ppm1j	965.718	-2.48059	1.56154e-32	6.68542e-31	56.9347	9.20559	55.9552	57.9142	6.93814	11.473
4933412E12Rik	826.099	-2.47842	3.95428e-39	2.30305e-37	67.3804	10.8915	63.1163	71.6444	9.64658	12.1365
Gm12827	52.8611	-2.47749	9.31345e-05	0.000400643	2.4404	0.389343	2.46462	2.41619	0.550091	0.228595
Gm46614	54.2043	-2.47572	5.67738e-05	0.000254502	25.1192	4.08219	19.951	30.2875	3.27307	4.89131
Slc16a11	433.915	-2.4754	2.01406e-23	5.14008e-22	15.7904	2.56295	15.4771	16.1038	2.03407	3.09182
Gm9785	279.306	-2.47496	1.77103e-17	2.9588e-16	74.2498	11.9589	67.5894	80.9102	13.7	10.2177
Manba	218.068	-2.4736	0.00306008	0.00981619	7.8713	1.28109	8.19335	7.54926	0.548268	2.01392
Sult5a1	417.021	-2.47125	2.05223e-25	5.91666e-24	36.4393	5.89232	39.379	33.4996	6.20725	5.57738
Dedd	703.574	-2.46834	2.37726e-38	1.3245e-36	12.2903	1.99898	12.1433	12.4373	1.83037	2.16759
Cdc20b	79.9113	-2.46727	4.79842e-06	2.54412e-05	1.91082	0.313431	2.18303	1.63861	0.181761	0.445101
Lima1	3143.1	-2.46681	3.52417e-61	4.62988e-59	93.6829	15.2609	86.4097	100.956	13.1301	17.3917
Rab11fip5	71.0134	-2.4656	5.93125e-05	0.000264907	1.61754	0.259479	1.48063	1.75446	0.420113	0.098844
Plekhd1	155.211	-2.4648	9.61712e-12	1.01168e-10	3.86443	0.629912	3.60763	4.12122	0.595152	0.664673
Lpcat1	526.248	-2.46451	1.13269e-21	2.57973e-20	19.2	3.13892	21.6838	16.7161	2.31715	3.96069
Foxi3	250.895	-2.4604	5.68397e-15	7.84626e-14	29.1801	4.78926	25.5518	32.8084	3.7954	5.78311
Usp9x	4467.56	-2.46025	1.89053e-71	3.26215e-69	45.8458	7.49959	43.503	48.1887	6.49719	8.50199
Fbxo17	183.461	-2.45596	1.67341e-12	1.8967e-11	12.7724	2.09949	11.1277	14.417	1.81818	2.3808
Exoc3l	212.463	-2.45481	2.9149e-14	3.79923e-13	8.50323	1.3871	8.32201	8.68444	1.63101	1.14319
Esm1	24.0639	-2.45455	0.00978961	0.0277294	1.60965	0.259109	1.75276	1.46653	0.435307	0.0829105
Adcy7	457.776	-2.45332	6.64186e-19	1.24755e-17	7.48679	1.23151	5.55104	9.42254	1.13995	1.32307
Ryr1	123.543	-2.45199	8.5185e-10	7.33301e-09	1.09897	0.180262	1.15868	1.03926	0.183721	0.176803
Ano6	337.54	-2.45038	8.57029e-21	1.83144e-19	6.15324	1.01486	6.36222	5.94426	0.862623	1.16709
Lrp10	1412.02	-2.44939	1.38475e-30	5.29226e-29	65.17	10.7632	52.54	77.7999	8.57136	12.955
Sesn1	1256.99	-2.4484	7.08392e-58	8.35686e-56	52.801	8.68503	52.5476	53.0544	8.9105	8.45956
Prickle1	1125.97	-2.44741	3.60375e-49	3.14437e-47	15.4791	2.55509	15.1953	15.7629	2.28908	2.8211
Slc16a9	86.63	-2.44714	2.42074e-07	1.53728e-06	3.31223	0.546974	3.17729	3.44718	0.499428	0.59452
Ldlr	1249.25	-2.44671	1.03328e-31	4.17682e-30	38.6438	6.34193	37.9012	39.3864	7.99219	4.69167
Efhb	172.548	-2.44488	1.20716e-11	1.25447e-10	4.41753	0.724609	4.80089	4.03418	0.876709	0.572509
Ccnjl	127.96	-2.44447	1.09893e-08	8.32548e-08	6.61046	1.09823	5.27941	7.94152	0.844824	1.35163
Cass4	68.4391	-2.44397	7.34704e-05	0.000322849	2.39453	0.3898	2.3704	2.41866	0.62749	0.152109
Itga9	58.508	-2.443	9.15314e-05	0.000394407	1.12507	0.183524	1.27175	0.978384	0.27156	0.0954879
Dppa2	62.1949	-2.44288	1.62992e-05	7.9609e-05	4.48825	0.746732	4.51975	4.45676	0.550245	0.943219
Gm36606	36.7808	-2.44265	0.000830389	0.00300332	5.33107	0.879956	4.12106	6.54107	0.947672	0.81224
Frem2	238.964	-2.44201	3.33865e-13	3.9998e-12	1.43436	0.238888	1.44384	1.42488	0.160199	0.317577
Gja5	24.6431	-2.4415	0.00523256	0.0158776	1.08697	0.179918	1.27505	0.898883	0.167929	0.191907
Gm20599	243.424	-2.4404	8.11842e-17	1.29458e-15	32.5624	5.38136	34.1172	31.0077	5.6051	5.15762
Fmnl3	999.011	-2.43801	2.87602e-29	1.0215e-27	30.6565	5.10477	26.0773	35.2357	4.01514	6.1944
Gm10139	167.804	-2.43683	9.4394e-12	9.94794e-11	17.5585	2.92808	17.5763	17.5406	2.33766	3.51849
Slc5a4a	33.5345	-2.43447	0.00123434	0.00428987	2.28344	0.381821	2.22419	2.34269	0.296983	0.466659
Cyp4f13	741.028	-2.43379	9.14223e-31	3.5587e-29	52.9686	8.82669	59.7292	46.208	7.51199	10.1414
Tec	290.095	-2.43336	8.52757e-18	1.46926e-16	13.3957	2.22128	12.3274	14.4639	2.51608	1.92648
Spx	35.1317	-2.4305	0.000915274	0.00328108	3.11282	0.521081	3.08144	3.14419	0.434825	0.607337
Sulf1	776.36	-2.42761	6.82845e-37	3.49308e-35	16.1983	2.71268	16.1406	16.2561	2.34381	3.08155
B4gat1	1715.31	-2.42669	2.13997e-64	2.99881e-62	117.917	19.7313	116.07	119.764	18.2565	21.206
Asb14	24.4295	-2.42657	0.00554485	0.0167221	1.03181	0.172591	1.17865	0.884968	0.16109	0.184091
Slc11a1	33.5636	-2.42249	0.00499876	0.0152462	1.82607	0.300726	1.5472	2.10494	0.533687	0.0677656
Ryr2	169.736	-2.42216	4.62473e-10	4.11123e-09	1.39897	0.23511	1.76622	1.03172	0.193099	0.277122
Sirpa	431.854	-2.41983	3.96645e-15	5.54823e-14	9.56534	1.61765	9.65188	9.4788	0.955258	2.28004
Tmem130	336.304	-2.41764	9.79534e-18	1.67397e-16	17.1907	2.90582	18.0932	16.2881	2.17646	3.63517
Insl6	45.252	-2.41644	0.000195582	0.000792961	9.5831	1.61816	10.2763	8.88991	1.38705	1.84928
Mid1ip1	441.878	-2.41466	1.6465e-26	5.00925e-25	30.0012	5.04934	31.5795	28.423	5.18711	4.91157
Phf1	687.981	-2.41149	1.77461e-29	6.41133e-28	39.2353	6.64248	33.7123	44.7583	6.01696	7.268
Aass	102.779	-2.4094	9.02954e-08	6.03065e-07	3.87482	0.659581	3.70498	4.04465	0.494705	0.824457
Paqr8	239.955	-2.40726	1.21371e-14	1.63064e-13	6.07027	1.02637	5.18561	6.95493	1.12025	0.932495
Slc6a4	90.1681	-2.40673	5.98404e-07	3.60414e-06	4.58436	0.771626	4.26708	4.90163	0.971993	0.571259
Tlcd5	46.7181	-2.40376	0.000168981	0.000693868	1.39692	0.238281	1.37487	1.41898	0.196238	0.280323
Gstt2	250.266	-2.40239	5.09474e-15	7.07511e-14	19.1258	3.23421	21.092	17.1596	3.79769	2.67074
Nmi	84.7385	-2.4002	8.54688e-07	5.05683e-06	7.15812	1.22518	6.65725	7.659	0.970933	1.47943
A2ml1	272.672	-2.3989	2.69564e-16	4.15524e-15	8.0932	1.37558	7.13988	9.04653	1.5264	1.22476
Fcgr3	145.477	-2.397	1.00046e-09	8.53917e-09	6.98387	1.19898	7.33658	6.63117	0.866905	1.53106
1700010I14Rik	35.3244	-2.39516	0.00168106	0.00569515	2.49235	0.421912	1.97734	3.00737	0.579106	0.264718
Muc1	38.0579	-2.3936	0.00273206	0.00884869	2.37109	0.398416	2.62938	2.1128	0.680228	0.116603
Mapk4	372.353	-2.39188	5.5355e-18	9.71845e-17	7.60491	1.29422	7.67547	7.53435	1.63098	0.957465
Gm7233	28.9672	-2.39028	0.00385728	0.0121032	2.99395	0.512225	3.98346	2.00444	0.508208	0.516242
Gm9465	51.6397	-2.38916	0.000310049	0.00121652	3.09916	0.524531	3.57993	2.6184	0.786808	0.262253
Ptbp3	5051.56	-2.38688	5.54474e-86	1.40885e-83	93.6339	16.0742	88.8501	98.4177	16.9957	15.1527
Gm36254	193.075	-2.3825	8.05574e-11	7.67113e-10	8.12355	1.41084	7.76013	8.48697	0.92302	1.89867
Adad2	1225.81	-2.38221	1.77327e-06	1.00337e-05	85.1666	14.7354	71.3645	98.9688	10.1361	19.3347
Tgfbi	101.995	-2.38128	5.08476e-08	3.51059e-07	5.1857	0.895879	4.90218	5.46921	0.836181	0.955576
Klhl29	79.2629	-2.37891	1.8264e-06	1.03176e-05	1.56692	0.269819	1.76772	1.36613	0.292248	0.247391
Gm32705	63.235	-2.37653	2.23021e-05	0.000106323	13.3394	2.32343	12.753	13.9258	1.73644	2.91042
Ifi27l2a	18.5498	-2.3738	0.0187488	0.0490616	2.91779	0.506018	2.08724	3.74834	0.518376	0.49366
Ppfibp2	2258.79	-2.37262	2.2587e-70	3.70394e-68	35.1083	6.0936	36.9965	33.2202	5.77846	6.40875
Ccnd2	18105.8	-2.37086	9.23888e-81	2.20228e-78	393.089	68.3216	422.804	363.375	60.2515	76.3917
Slc48a1	172.555	-2.37024	3.29328e-10	2.96524e-09	9.48666	1.66098	8.58038	10.3929	1.14764	2.17433
Anxa7	4273.41	-2.3675	1.1362e-97	4.17005e-95	196.008	34.1354	200.052	191.965	32.9212	35.3496
Cdh20	175.731	-2.36645	7.23251e-12	7.71712e-11	4.72626	0.826202	4.35418	5.09833	0.723875	0.928529
Fgf9	192.383	-2.36631	5.42639e-09	4.2604e-08	4.81123	0.844265	3.20469	6.41777	0.619218	1.06931
Hsf3	83.1986	-2.36401	6.37007e-05	0.000283139	3.37328	0.580428	4.11946	2.62709	0.932503	0.228354
Gm33301	110.871	-2.36324	1.55909e-08	1.1558e-07	14.1352	2.46952	14.7442	13.5262	2.37961	2.55943
Ticam1	64.3112	-2.36212	1.89453e-05	9.13564e-05	3.15596	0.554518	3.30834	3.00358	0.431308	0.677728
Fcer1g	191.025	-2.36034	5.03332e-08	3.48207e-07	40.3078	7.1216	43.919	36.6966	3.24628	10.9969
Iqcg	479.458	-2.35794	2.41974e-25	6.90732e-24	11.8971	2.09057	12.4625	11.3317	1.81313	2.36802
Nlrp4f	2718.43	-2.35699	9.41308e-73	1.70038e-70	107.065	18.7646	115.191	98.9385	18.8178	18.7115
Ptger4	87.0477	-2.35602	7.15808e-06	3.68864e-05	3.62735	0.643644	3.47888	3.77581	0.343948	0.943341
Npas2	43.3714	-2.35472	0.000352097	0.00137103	1.3424	0.235538	1.49479	1.19001	0.237974	0.233103
Tunar	257.826	-2.35313	1.19736e-16	1.88849e-15	10.5314	1.84892	10.3704	10.6923	1.95321	1.74463
Txnip	4862.39	-2.34579	2.02913e-68	3.17011e-66	240.556	42.5352	212.531	268.582	42.8965	42.174
Myo18a	974.129	-2.34547	5.98771e-28	1.98349e-26	14.9802	2.65639	12.0508	17.9097	2.32124	2.99153
Fbxw4	51.5539	-2.34142	0.000309365	0.00121425	1.54859	0.274627	2.1209	0.976279	0.247526	0.301728
Gpr3	45.6364	-2.33983	0.000800429	0.00290633	2.9433	0.528868	2.23606	3.65055	0.284788	0.772948
Cda	257.091	-2.33966	4.8276e-16	7.27665e-15	25.0684	4.43734	26.5438	23.5929	4.82833	4.04635
Pzp	50.0568	-2.33931	0.000158516	0.000654035	1.48037	0.264239	1.38591	1.57483	0.211865	0.316613
Hoxb2	72.5423	-2.33854	1.25857e-05	6.25955e-05	5.48298	0.973134	4.18733	6.77863	1.04161	0.904658
Hoxb5	80.3852	-2.33712	0.000174935	0.000715903	5.86039	1.05758	5.01584	6.70494	0.321889	1.79327
Zmym3	9493.96	-2.33467	2.41681e-99	9.16089e-97	192.81	34.3666	182.275	203.344	32.8226	35.9106
Slc2a3	1616.51	-2.3342	1.2689e-51	1.21741e-49	39.646	7.078	40.2686	39.0234	6.1884	7.96761
Pfkp	901.013	-2.33406	8.34713e-29	2.86779e-27	10.6149	1.89646	11.9421	9.28765	1.52445	2.26847
Ovol2	655.185	-2.33277	1.66529e-24	4.55678e-23	54.8606	9.79818	64.6787	45.0425	8.48152	11.1148
4930591A17Rik	21.551	-2.33234	0.0115699	0.0321074	4.05595	0.726523	3.71114	4.40076	0.622756	0.83029
Shfl	246.366	-2.332	9.0572e-14	1.13259e-12	10.9269	1.93897	11.9605	9.89324	2.34356	1.53438
Col25a1	193.797	-2.32613	3.72285e-12	4.08154e-11	3.29768	0.587956	3.43374	3.16161	0.693779	0.482133
Adhfe1	31.7524	-2.32453	0.00334623	0.0106484	1.28493	0.232885	1.40278	1.16709	0.133995	0.331776
Rsad2	94.5133	-2.32217	3.13925e-06	1.71072e-05	3.46093	0.619037	4.59662	2.32523	0.685278	0.552795
Gm32728	36.9628	-2.3217	0.0021594	0.00714709	3.15387	0.559991	3.94692	2.36082	0.798086	0.321897
1700080O16Rik	248.122	-2.32148	3.81562e-14	4.90138e-13	18.7386	3.38547	18.6922	18.785	2.62629	4.14464
Ptgr1	973.681	-2.32069	2.49138e-43	1.7299e-41	61.8874	11.1333	65.3531	58.4217	10.7279	11.5386
Gm4961	60.0738	-2.32024	4.3377e-05	0.000197085	3.69397	0.661436	3.47463	3.9133	0.780176	0.542697
Kcnq1	33.4839	-2.31973	0.00442865	0.0136751	1.3049	0.231255	1.61615	0.993662	0.3645	0.0980106
Fstl1	1315.44	-2.31778	1.92532e-53	1.96979e-51	50.3941	9.07855	52.6201	48.1681	9.02599	9.13112
Gm39871	21.8023	-2.31776	0.0167211	0.0443683	3.70841	0.677751	4.26712	3.1497	0.281851	1.07365
Arrdc3	8459.15	-2.31771	3.43412e-95	1.1677e-92	214.625	38.6416	227.792	201.458	40.1875	37.0957
Mccc2	696.672	-2.31727	1.37641e-35	6.77137e-34	45.3381	8.17598	46.3361	44.3401	7.93765	8.41431
Cartpt	128.352	-2.31365	1.42385e-07	9.30006e-07	17.8192	3.19179	20.9259	14.7125	4.28496	2.09863
Snx33	1374.43	-2.31339	4.36645e-32	1.79966e-30	40.8125	7.40007	33.7591	47.8658	6.32036	8.47978
Dyrk4	72.9962	-2.31214	5.86696e-06	3.07052e-05	3.53082	0.637015	3.61252	3.44911	0.694252	0.579779
Postn	49.5168	-2.30946	0.00121647	0.00423794	2.01203	0.366352	3.03023	0.993835	0.246378	0.486326
Cbx7	241.737	-2.30768	2.16543e-12	2.42465e-11	4.77978	0.872856	4.15495	5.40461	0.645485	1.10023
Ppp1cb	7507.09	-2.30747	9.81381e-109	4.44931e-106	249.903	45.3745	248.274	251.533	43.7637	46.9854
Abhd3	460.874	-2.30504	2.68e-24	7.1971e-23	16.3194	2.96288	15.2664	17.3724	3.15173	2.77402
Ier3	125.157	-2.3049	4.54343e-09	3.60018e-08	5.27902	0.960891	5.36236	5.19567	0.909296	1.01249
Myo1e	1616.82	-2.30474	6.75995e-54	7.13715e-52	44.6637	8.10693	46.4335	42.8939	8.73079	7.48307
Gm31560	84.6193	-2.30283	1.64786e-06	9.3685e-06	1.27216	0.232337	1.14159	1.40273	0.207981	0.256693
Gm35941	19.7576	-2.30129	0.0188856	0.0493639	2.1594	0.397855	1.93079	2.38801	0.242183	0.553527
Vil1	116.963	-2.30114	6.93594e-08	4.71131e-07	5.1771	0.938757	4.68297	5.67123	1.15031	0.727203
Nkx2-3	56.0539	-2.30102	0.000203588	0.000823252	3.65434	0.67337	3.14153	4.16714	0.397331	0.949408
Farp1	87.7183	-2.3006	1.38698e-05	6.8475e-05	1.89048	0.348434	2.0286	1.75236	0.178911	0.517957
Bcl6	74.598	-2.30015	7.06847e-06	3.64734e-05	1.55951	0.284701	1.79753	1.32149	0.26573	0.303673
Gm18015	23.4966	-2.29762	0.0171679	0.0454079	3.95085	0.71017	3.41219	4.48952	1.20796	0.212376
Ltb	70.6687	-2.29696	9.87345e-06	4.98567e-05	2.22615	0.405562	2.32272	2.12958	0.452849	0.358276
Rab25	140.377	-2.29656	1.55458e-08	1.15319e-07	18.2674	3.35673	21.4904	15.0445	2.51893	4.19453
Tjp2	1628.86	-2.2962	1.43177e-49	1.28316e-47	23.5052	4.30827	24.0516	22.9588	3.7529	4.86363
Pld2	210.537	-2.29513	1.0881e-11	1.13688e-10	1.64239	0.300939	1.98785	1.29694	0.271686	0.330192
AI839979	40.1508	-2.29395	0.0086118	0.0246927	4.72764	0.850115	4.90218	4.5531	1.62591	0.0743226
Stk32b	27.263	-2.29382	0.00517861	0.0157283	1.09294	0.199584	1.11439	1.07148	0.221766	0.177402
C330020E22Rik	77.2355	-2.29267	3.45315e-06	1.869e-05	1.00886	0.18485	1.02691	0.990799	0.187954	0.181746
Unc13d	54.1868	-2.29207	0.000197259	0.00079934	1.40202	0.255917	1.09412	1.70992	0.315297	0.196537
Macroh2a1	3275.13	-2.28919	1.20451e-70	2.00364e-68	53.0418	9.76093	54.6561	51.4274	8.83311	10.6887
Piwil4	1892.42	-2.28837	5.37364e-60	6.71618e-58	76.0643	13.9689	77.8718	74.2568	14.8658	13.072
Rian	85.6693	-2.28713	4.73798e-06	2.51611e-05	1.64774	0.304069	2.04667	1.24881	0.255427	0.352711
Arhgap18	244.914	-2.28535	3.06748e-10	2.77055e-09	8.66591	1.60675	6.01845	11.3134	1.23773	1.97576
Lrrc56	442.469	-2.28313	2.214e-24	6.00845e-23	17.4389	3.22068	16.8047	18.0732	3.14588	3.29548
Trpv4	591.361	-2.28303	6.00267e-25	1.6702e-23	24.6978	4.57715	23.4995	25.8962	3.72869	5.42562
Cacng5	38.5408	-2.28255	0.00121212	0.00422469	1.05875	0.196005	0.83975	1.27776	0.182944	0.209066
Nags	20.6475	-2.28076	0.0176709	0.0465468	1.34193	0.247329	0.941122	1.74274	0.288558	0.2061
Dcaf12	3586.41	-2.28048	3.83237e-87	1.00696e-84	105.176	19.4539	106.6	103.753	18.9378	19.9699
Cdh3	1892.22	-2.27978	4.40638e-41	2.838e-39	64.4594	11.9614	59.6965	69.2224	9.86429	14.0586
Dnajc10	6150.05	-2.27834	5.4471e-85	1.35428e-82	207.651	38.4369	198.146	217.155	40.4096	36.4643
Plekha1	3531.74	-2.27818	7.15931e-73	1.30344e-70	91.8489	16.9975	99.2096	84.4883	17.3099	16.685
Upk2	49.5743	-2.27797	0.00020143	0.000815096	7.80039	1.4464	7.33838	8.2624	1.39657	1.49623
Zfp799	495.955	-2.27716	1.3908e-26	4.28202e-25	10.7358	1.99211	10.6393	10.8323	1.88498	2.09925
Gm21935	113.128	-2.27701	6.58365e-08	4.48254e-07	1.67752	0.310413	1.92123	1.43381	0.320398	0.300428
Zfp36	1107.07	-2.27603	2.99172e-38	1.65094e-36	86.2133	16.0257	77.8981	94.5286	14.566	17.4855
Zfp773	551.872	-2.27329	9.9375e-28	3.26849e-26	25.0816	4.67077	25.3211	24.842	4.21158	5.12996
Rpl22l1	3857.84	-2.27323	2.74628e-80	6.34994e-78	954.129	177.16	951.879	956.378	187.014	167.305
Lamb1	2746.84	-2.27067	2.5791e-47	2.1072e-45	64.4407	12.0267	57.6675	71.2139	10.3845	13.6689
Hoxb6	69.4222	-2.2678	7.34725e-05	0.000322849	5.8785	1.10728	4.46243	7.29456	0.706803	1.50775
Ctag2l2	195.824	-2.26465	4.69373e-11	4.57926e-10	34.6874	6.4461	34.8656	34.5092	8.06132	4.83087
Chd1	543.683	-2.2645	6.67789e-24	1.75263e-22	9.44055	1.75966	10.521	8.36014	1.95585	1.56348
Gm3336	92.9188	-2.26372	1.68192e-05	8.19413e-05	5.43713	1.00548	6.26881	4.60545	1.49202	0.518931
Impact	685.006	-2.26252	2.68009e-25	7.60357e-24	4.43969	0.832681	5.10089	3.7785	0.719626	0.945736
Cyp4f16	750.407	-2.26223	4.52986e-34	2.05775e-32	44.6897	8.35884	47.7414	41.638	8.63072	8.08696
Dusp1	5269.34	-2.26184	3.77286e-07	2.33751e-06	373.214	69.7058	476.72	269.708	79.391	60.0207
Chrna4	420.079	-2.26175	7.26444e-15	9.92134e-14	12.3749	2.32338	8.77747	15.9724	2.22977	2.41699
Dhx58	142.426	-2.26149	6.23144e-09	4.84803e-08	8.11559	1.51135	8.49689	7.7343	1.86607	1.15662
Cmtm8	256.354	-2.26088	4.15544e-15	5.80556e-14	29.3398	5.50348	26.7462	31.9334	5.40821	5.59874
Trim12c	894.118	-2.25952	1.46637e-39	8.69368e-38	32.8612	6.16798	34.4335	31.2889	5.9421	6.39385
Gm34006	47.6437	-2.2587	0.000355929	0.00138386	1.29462	0.24366	1.48784	1.10139	0.211323	0.275997
Gm8914	35.9965	-2.25642	0.00737553	0.0215651	2.8885	0.552871	2.29163	3.48537	0.13423	0.971512
Cacnb1	224.76	-2.25501	1.69677e-12	1.92129e-11	7.3462	1.3866	6.18886	8.50355	1.25539	1.51781
Peg10	111.99	-2.25491	4.99927e-08	3.45984e-07	2.30524	0.433986	2.42162	2.18886	0.423375	0.444598
Mertk	151.481	-2.25448	1.59104e-09	1.32617e-08	4.09629	0.767235	4.32629	3.86629	0.916413	0.618057
Serpinh1	819.088	-2.25417	8.88481e-34	4.01239e-32	45.9593	8.67726	44.643	47.2755	7.61627	9.73824
Il10ra	106.424	-2.25387	5.72705e-07	3.46017e-06	4.17042	0.783542	3.30881	5.03202	0.894166	0.672919
Tubb2b	70.3696	-2.25222	2.11896e-05	0.000101417	5.02852	0.944072	5.83019	4.22685	1.07168	0.816466
Pla2g5	790.238	-2.24812	7.1396e-37	3.64419e-35	37.208	7.03759	38.329	36.0871	6.88999	7.1852
Frmd6	4163.09	-2.24765	1.77026e-82	4.35447e-80	108.092	20.4315	108.194	107.99	21.4125	19.4505
Adck2	207.703	-2.24633	2.52926e-11	2.55825e-10	7.9545	1.49729	7.88473	8.02427	1.8747	1.11988
Gm19448	106.807	-2.24619	3.23383e-07	2.02198e-06	31.1769	5.91367	25.4645	36.8894	5.6931	6.13423
Zfp703	81.4906	-2.24588	6.98577e-06	3.60788e-05	3.37539	0.639695	2.67672	4.07407	0.646309	0.63308
St6gal1	95.1403	-2.24456	1.4711e-05	7.23258e-05	2.3672	0.450453	3.23432	1.50008	0.331926	0.56898
Rsph3b	172.48	-2.2433	4.03533e-10	3.60786e-09	14.6384	2.79197	15.6212	13.6556	2.12698	3.45697
Ldb2	44.1635	-2.24084	0.000838142	0.00302711	1.89961	0.362463	2.35945	1.43977	0.287245	0.43768
Ctag2	59.1471	-2.24065	7.44363e-05	0.00032665	9.46139	1.79301	10.4087	8.51407	1.95837	1.62764
Sdr39u1	131.492	-2.23999	7.04706e-09	5.46602e-08	10.7967	2.05602	9.90615	11.6872	1.96783	2.14421
Muc3a	23.5216	-2.23677	0.0146047	0.0393532	1.5777	0.30109	2.19902	0.956371	0.261131	0.341048
Arntl	1615.31	-2.23662	4.15037e-52	4.03214e-50	21.2762	4.04977	22.3759	20.1765	4.28467	3.81488
Evc2	148.441	-2.23579	9.90415e-10	8.45657e-09	4.93858	0.943493	4.55379	5.32337	0.890517	0.996469
Ifitm2	183.261	-2.23465	8.07021e-10	6.95748e-09	18.1179	3.48036	19.4956	16.7402	2.42533	4.5354
Il3ra	59.0377	-2.23318	6.82015e-05	0.000301208	2.73985	0.522907	2.72486	2.75483	0.543248	0.502566
Gm30108	21.406	-2.23077	0.0184823	0.0484357	6.62586	1.25462	7.98785	5.26386	1.72207	0.787182
Ahdc1	406.757	-2.22936	6.06183e-14	7.66749e-13	7.14967	1.37363	5.01156	9.28778	1.27686	1.4704
Gm30189	56.7514	-2.229	0.000261808	0.00103935	2.1817	0.42103	2.6514	1.712	0.278657	0.563403
Ggt5	42.5104	-2.22266	0.00120636	0.00420844	1.22109	0.237257	1.2871	1.15508	0.144423	0.33009
Gm29243	220.31	-2.22047	1.76025e-12	1.99053e-11	66.6317	12.8628	75.5153	57.7481	11.6457	14.08
Tjp1	3953.66	-2.22021	4.69448e-63	6.34771e-61	62.6572	12.0973	64.8801	60.4343	10.6353	13.5594
Ccdc30	198.027	-2.2179	2.50296e-10	2.28569e-09	1.90669	0.369736	2.22327	1.5901	0.284896	0.454577
Dlgap1	279.902	-2.21734	3.12011e-16	4.78086e-15	3.90561	0.755436	3.99938	3.81184	0.709253	0.801618
Gm15455	28.0756	-2.21519	0.00668792	0.0197444	1.27053	0.247513	1.36883	1.17223	0.17706	0.317966
Galnt17	104.857	-2.21437	2.32927e-07	1.48286e-06	2.79999	0.542231	3.04109	2.55888	0.522007	0.562454
Aff3	1011.43	-2.21326	9.73899e-39	5.60162e-37	13.3315	2.58791	13.42	13.2429	2.31331	2.86252
Prkn	227.833	-2.20732	2.82702e-13	3.40804e-12	2.35463	0.457105	2.55077	2.15848	0.485173	0.429038
Mapk12	346.48	-2.2067	1.35473e-18	2.47622e-17	16.69	3.24667	18.0595	15.3206	3.23138	3.26196
Rsph4a	248.827	-2.20436	0.00703728	0.0206833	9.3248	1.81531	14.2393	4.41029	1.50485	2.12577
Mageb7-ps	571.39	-2.20261	1.91045e-27	6.19542e-26	74.8498	14.6143	79.1742	70.5254	14.0703	15.1582
Anks1	309.131	-2.20121	9.63344e-17	1.52774e-15	1.98086	0.38632	1.87162	2.0901	0.416049	0.356591
Tmem179	98.085	-2.20083	1.32596e-06	7.63607e-06	5.62704	1.10219	4.62893	6.62514	1.02874	1.17563
Tbx3	2901.52	-2.19996	2.77478e-47	2.2591e-45	76.5644	15.0017	79.1736	73.9552	12.466	17.5374
Tox2	188.447	-2.19873	5.70477e-11	5.53064e-10	5.56483	1.09049	6.3071	4.82257	0.991392	1.1896
Plcb2	129.859	-2.19745	3.25922e-06	1.7715e-05	2.12651	0.420807	2.21705	2.03597	0.201892	0.639722
Plat	727.112	-2.19708	8.08364e-32	3.29647e-30	38.7807	7.59099	37.0049	40.5564	7.94538	7.23659
Fut10	781.454	-2.19487	3.60367e-20	7.36729e-19	12.2839	2.42257	10.7835	13.7842	1.76286	3.08229
Ssbp4	893.275	-2.19433	2.07407e-36	1.0448e-34	60.1343	11.789	63.7776	56.491	12.2497	11.3283
Abca7	399.61	-2.1942	6.01768e-15	8.27727e-14	8.03828	1.57883	6.02985	10.0467	1.6361	1.52156
Tcf7l2	1150.75	-2.19372	4.86915e-44	3.48559e-42	24.1406	4.74233	25.308	22.9733	4.57044	4.91422
Fndc1	137.111	-2.19314	2.9863e-08	2.13974e-07	2.47926	0.484772	2.24169	2.71683	0.587529	0.382015
4930552P12Rik	25.9948	-2.19271	0.00864213	0.0247612	1.41738	0.279432	1.38818	1.44658	0.244512	0.314352
4930570E01Rik	111.999	-2.1919	1.32662e-07	8.69448e-07	11.9201	2.33709	12.4981	11.3421	2.56279	2.1114
Fyn	729.764	-2.19037	1.29069e-28	4.3952e-27	13.9237	2.74891	13.8408	14.0066	2.33184	3.16597
Cd82	1793.47	-2.19002	1.87467e-48	1.58777e-46	114.442	22.5421	103.701	125.182	22.4712	22.6129
Tekt1	114.181	-2.18856	1.29945e-07	8.5261e-07	9.45035	1.86489	10.4868	8.41392	1.71589	2.01389
Dennd2d	528.453	-2.1881	1.28696e-23	3.336e-22	11.776	2.32862	11.822	11.73	1.98685	2.67039
Usp44	1401.86	-2.18743	9.14599e-45	6.79979e-43	29.3269	5.7932	30.5538	28.0999	5.20702	6.37938
Gm39109	418.99	-2.18721	5.0706e-22	1.1795e-20	21.4229	4.22851	21.2769	21.5688	4.09963	4.35738
Pacsin1	882.996	-2.18689	7.25344e-30	2.65791e-28	13.4026	2.65177	12.0496	14.7556	2.32517	2.97836
Cfap57	109.072	-2.1864	1.01093e-06	5.91916e-06	3.67212	0.719349	3.71796	3.62629	0.942986	0.495711
Gpm6b	71.5823	-2.18503	2.46679e-05	0.000116903	1.83512	0.363878	1.64103	2.0292	0.316606	0.411151
F11r	5695.52	-2.18488	1.60277e-91	4.75119e-89	312.12	61.6968	307.865	316.376	59.7822	63.6115
Ilvbl	231.261	-2.18403	7.41235e-12	7.90172e-11	8.8524	1.75297	10.4279	7.27685	1.54463	1.96131
Stx3	761.698	-2.18319	4.22836e-30	1.56931e-28	10.4979	2.0802	11.2711	9.72479	1.85502	2.30538
Tmco6	1195.39	-2.18312	2.21533e-40	1.3696e-38	82.2049	16.2972	80.2842	84.1257	14.4703	18.124
Pkn3	137.236	-2.18216	2.40442e-08	1.74115e-07	4.2093	0.832718	3.51133	4.90728	0.878255	0.787182
4933412E24Rik	129.508	-2.18178	7.80732e-07	4.64183e-06	10.0319	2.00486	9.33606	10.7277	1.17499	2.83473
Flot1	757.937	-2.18093	7.44033e-28	2.46116e-26	19.793	3.93155	21.138	18.448	3.32577	4.53733
Piezo1	236.635	-2.18081	2.27234e-13	2.75951e-12	3.57772	0.710598	3.33866	3.81678	0.645138	0.776058
Dcaf8	7320.91	-2.1806	3.57541e-92	1.13247e-89	201.776	40.0119	196.874	206.678	38.2366	41.7872
Abhd4	1152.32	-2.18042	1.82932e-42	1.23677e-40	55.8707	11.0747	59.5552	52.1863	10.7428	11.4065
Susd1	348.934	-2.17956	1.93176e-16	3.00782e-15	9.46124	1.88407	9.73732	9.18516	1.50688	2.26126
Lclat1	1494.12	-2.17942	2.8642e-47	2.32372e-45	27.2049	5.38693	27.1999	27.2098	5.82348	4.95038
Tspyl5	177.553	-2.17847	1.42662e-09	1.19863e-08	6.01114	1.19743	4.85468	7.1676	1.0466	1.34826
Snai1	379.337	-2.17722	1.20715e-17	2.04781e-16	31.7741	6.33299	28.6517	34.8965	5.4592	7.20677
Sez6	185.245	-2.17681	3.55913e-08	2.52514e-07	5.56988	1.11515	4.18462	6.95514	0.761184	1.46912
Rab3a	1055.08	-2.17392	5.98125e-35	2.81667e-33	45.8519	9.12926	40.8251	50.8786	9.32838	8.93013
Lrrc8e	142.453	-2.17378	3.19474e-07	1.99915e-06	4.31369	0.86637	3.63832	4.98906	0.545155	1.18759
Smco2	199.949	-2.17254	5.04002e-12	5.47371e-11	10.694	2.13108	10.3076	11.0804	2.13329	2.12886
Ttc26	221.288	-2.17157	9.62666e-12	1.01222e-10	7.07993	1.4171	7.76287	6.397	1.15015	1.68405
Ldha	565.481	-2.17125	4.21072e-18	7.47201e-17	14.3719	2.88051	15.0285	13.7152	2.05642	3.7046
Megf6	155.768	-2.17012	1.57859e-08	1.16913e-07	2.91588	0.584619	2.32097	3.51079	0.4951	0.674137
Lrrn4cl	58.6248	-2.16923	0.000114213	0.000483667	3.0622	0.611958	3.2891	2.8353	0.586828	0.637088
9430085M18Rik	97.5013	-2.16923	1.03226e-06	6.03439e-06	4.68	0.934821	4.22456	5.13544	0.944487	0.925155
Ubxn10	998.313	-2.16744	8.86332e-38	4.76599e-36	29.6042	5.93119	29.2082	30.0001	5.38481	6.47757
Tut7	498.202	-2.1671	1.85319e-22	4.42659e-21	10.5205	2.10006	9.92203	11.1189	2.31462	1.8855
Dppa4	1823.91	-2.16701	2.74466e-43	1.90006e-41	161.508	32.2674	182.429	140.588	33.2204	31.3145
Cfap74	141.583	-2.16543	1.26963e-07	8.33991e-07	1.12918	0.227825	1.18786	1.0705	0.148044	0.307605
Zfp418	159.223	-2.16426	6.5208e-10	5.68958e-09	7.99882	1.60643	7.91821	8.07943	1.46924	1.74361
Hdac5	2420.05	-2.16358	5.90483e-08	4.04538e-07	68.7638	13.8308	55.7122	81.8155	10.9896	16.672
Agpat3	86.079	-2.16255	7.11809e-06	3.67048e-05	1.58299	0.31948	1.45081	1.71517	0.248494	0.390466
Gm46899	145.587	-2.15941	2.56689e-06	1.41956e-05	1.42481	0.283812	1.29765	1.55198	0.429262	0.138362
Dnajb13	30.1834	-2.15872	0.00604863	0.0180716	3.35364	0.678879	3.68606	3.02122	0.500247	0.857512
Ankrd6	1310.88	-2.15743	3.84947e-31	1.5241e-29	24.9151	5.03464	24.0843	25.7459	3.99148	6.0778
Gm39426	22.4755	-2.15655	0.0165662	0.0440026	1.34277	0.271246	1.55886	1.12668	0.235248	0.307244
Phyh	96.5285	-2.154	1.19864e-06	6.94956e-06	8.87173	1.78921	8.30239	9.44106	1.8632	1.71522
Hunk	201.58	-2.15387	1.48763e-11	1.53489e-10	3.92668	0.791294	3.65691	4.19644	0.855562	0.727026
Vasp	2950.21	-2.15312	1.44552e-37	7.70121e-36	177.322	35.9116	152.025	202.619	30.5557	41.2675
Fbxo16	493.252	-2.15287	9.68927e-21	2.06294e-19	17.5155	3.52991	19.825	15.206	3.7954	3.26441
Asphd2	336.6	-2.15185	1.35092e-17	2.28166e-16	8.2035	1.65595	8.68322	7.72378	1.72851	1.58339
Gdf10	220.86	-2.14681	1.99551e-10	1.83533e-09	7.98122	1.62114	6.06954	9.89291	1.61099	1.63128
Gm41609	33.27	-2.1416	0.00661477	0.0195484	1.81975	0.374719	2.08758	1.55192	0.185164	0.564275
B230311B06Rik	94.9534	-2.13906	1.83002e-06	1.03355e-05	15.716	3.21466	16.3324	15.0997	2.80126	3.62807
Spryd4	304.275	-2.13858	2.97734e-15	4.21052e-14	26.2106	5.36216	27.9859	24.4353	4.61613	6.10818
Ldlrad4	260.499	-2.13809	9.10514e-13	1.0537e-11	1.29292	0.263037	1.16099	1.42486	0.305251	0.220823
Stk35	1502.36	-2.13659	1.30792e-30	5.00689e-29	32.8271	6.69004	38.7587	26.8955	7.31474	6.06534
Ccdc120	697.115	-2.1349	5.6504e-26	1.66644e-24	25.8679	5.30824	25.1879	26.5478	4.46286	6.15363
Eif4e3	186.618	-2.13449	1.52115e-10	1.41568e-09	3.69271	0.757792	3.96072	3.4247	0.647735	0.867848
Nhlrc1	387.134	-2.13262	7.32573e-20	1.47164e-18	22.8033	4.67459	22.8169	22.7897	4.52272	4.82647
Gck	46.8725	-2.13103	0.000650534	0.00240782	2.04599	0.419015	1.9532	2.13879	0.443676	0.394354
Lgals7	105.106	-2.13077	3.52256e-06	1.9039e-05	18.688	3.82648	13.9866	23.3893	4.32196	3.331
Acsf2	769.848	-2.13041	2.80188e-32	1.17577e-30	30.3881	6.23238	29.342	31.4342	6.37588	6.08887
Nyap1	74.6778	-2.12927	8.87381e-05	0.000383586	2.4853	0.515162	2.111	2.8596	0.320141	0.710184
Casz1	515.125	-2.12871	2.82616e-18	5.06562e-17	3.29312	0.679339	2.85061	3.73563	0.553097	0.805581
Plpp3	459.343	-2.12572	9.12019e-19	1.69788e-17	19.6103	4.02555	17.929	21.2916	4.63226	3.41884
Bcr	809.356	-2.12551	3.22076e-32	1.34423e-30	13.7513	2.83175	14.7368	12.7657	2.73518	2.92831
Arhgef5	134.117	-2.12418	3.39885e-08	2.4181e-07	3.31049	0.684853	3.30437	3.31661	0.572227	0.797479
Map3k12	1497.29	-2.12251	9.07955e-34	4.08936e-32	31.6439	6.5486	29.8373	33.4505	5.3791	7.7181
Gjb1	50.6033	-2.121	0.000880889	0.00316714	3.3485	0.698505	3.15017	3.54683	0.412163	0.984848
Atad2	8843.12	-2.12015	3.33137e-79	7.47843e-77	100.181	20.6904	108.32	92.0408	20.7766	20.6043
Tmem63b	397.558	-2.11935	1.28201e-16	2.02062e-15	14.7937	3.07197	13.6166	15.9707	2.48535	3.65859
Lemd3	410.785	-2.1191	1.12135e-18	2.06432e-17	11.5297	2.38511	12.9077	10.1516	2.26848	2.50175
Ank3	383.76	-2.11725	1.33729e-18	2.44821e-17	1.13761	0.236113	1.15397	1.12124	0.209646	0.26258
Acap2	1739.62	-2.1164	2.4943e-54	2.69501e-52	17.0059	3.52386	16.7347	17.2772	3.49552	3.55219
Tom1l2	652.573	-2.11542	8.21287e-21	1.76321e-19	11.9376	2.48505	10.543	13.3322	2.01002	2.96009
Ank	243.829	-2.11502	3.26418e-12	3.59745e-11	9.40497	1.95183	10.8748	7.93511	1.81014	2.09353
Zmiz1	702.93	-2.11484	3.2986e-29	1.16621e-27	8.95216	1.85888	8.47843	9.42589	1.77346	1.9443
Brdt	1243.06	-2.1141	9.929e-40	5.93226e-38	17.4653	3.61769	18.3017	16.629	3.9022	3.33318
Fxyd1	26.2528	-2.11363	0.0105071	0.0295015	1.99087	0.41396	1.94986	2.03189	0.386375	0.441544
Gstp1	971.143	-2.11348	1.01519e-29	3.69077e-28	87.9154	18.3059	81.4996	94.3312	15.6369	20.9749
Ppic	592.616	-2.11022	1.90136e-20	3.96065e-19	62.0469	12.9655	58.8738	65.2199	10.2033	15.7277
Rpl15-ps3	73.8298	-2.10912	0.00144774	0.00497689	14.205	2.94538	23.595	4.81508	3.03848	2.85228
Cd276	1023.24	-2.10896	1.87898e-34	8.63735e-33	43.1021	8.97194	39.5932	46.611	9.354	8.58988
Zc3h10	1738.2	-2.10816	6.82734e-48	5.67848e-46	81.2356	16.9464	76.1522	86.3189	16.0996	17.7932
AA467197	26.7094	-2.10773	0.017306	0.0457265	2.80149	0.591712	1.90063	3.70235	0.297998	0.885426
Ushbp1	264.66	-2.10701	8.01494e-13	9.3408e-12	9.941	2.07796	8.49996	11.382	1.91677	2.23914
Pla2g4f	26.1444	-2.10673	0.0130852	0.0358097	1.1206	0.233748	1.4524	0.788794	0.218172	0.249324
Esrrb	91.3139	-2.10623	3.30756e-06	1.79524e-05	2.39445	0.499893	2.26879	2.52011	0.490357	0.50943
Sfxn1	78.1118	-2.10467	1.90064e-05	9.15747e-05	2.88527	0.602779	2.57002	3.20051	0.607285	0.598274
Dusp5	343.844	-2.10445	8.05681e-15	1.0997e-13	25.5269	5.30788	26.7671	24.2866	6.38882	4.22693
Pde1c	565.504	-2.10164	3.63193e-19	6.98068e-18	5.21201	1.0959	5.0013	5.42273	0.841657	1.35015
Pla2g2d	108.258	-2.10066	6.36607e-07	3.81931e-06	6.45636	1.35138	7.18276	5.72995	1.35142	1.35134
Hspa1a	798.996	-2.09704	2.74928e-25	7.79031e-24	9.62778	2.01967	8.366	10.8896	2.19508	1.84426
2810459M11Rik	89.5522	-2.09658	2.87173e-05	0.000134549	3.61147	0.765558	3.49683	3.72611	0.458046	1.07307
Slc38a7	624.738	-2.09529	3.91397e-24	1.03902e-22	23.5832	4.97164	24.4013	22.7652	4.24058	5.70271
Igf2bp2	381.083	-2.09477	3.17557e-18	5.67869e-17	13.1473	2.75872	13.3299	12.9647	3.01315	2.50429
Abcd4	175.231	-2.09411	3.03336e-09	2.44466e-08	6.30467	1.31964	6.81838	5.79097	1.5906	1.04868
Kcnk2	92.8485	-2.09347	1.15841e-05	5.79382e-05	2.37998	0.503681	1.88668	2.87327	0.407955	0.599407
Smim22	175.668	-2.09003	5.67675e-10	4.99079e-09	49.396	10.3963	48.1193	50.6728	11.491	9.30168
Ankzf1	368.334	-2.08906	5.45695e-17	8.79272e-16	14.1789	2.99941	12.7871	15.5707	2.79955	3.19928
Gm28321	535.378	-2.08869	5.03892e-22	1.17331e-20	29.2649	6.19599	30.7422	27.7876	5.36931	7.02267
Gm31724	278.08	-2.08847	1.11517e-14	1.50183e-13	14.4848	3.05935	14.0067	14.9628	3.07635	3.04236
Rsph1	100.372	-2.0881	2.07243e-06	1.15942e-05	12.2246	2.58134	13.9563	10.493	2.55674	2.60594
Dennd4b	137.592	-2.08772	1.8122e-07	1.16881e-06	2.84314	0.604315	2.41876	3.26751	0.470041	0.73859
F2r	317.133	-2.08648	3.15764e-15	4.44917e-14	12.754	2.7065	12.2574	13.2507	2.33114	3.08187
Msl3	59.7322	-2.08567	0.000387564	0.00149579	1.36351	0.291225	1.26738	1.45963	0.181792	0.400659
Gm47708	159.343	-2.08464	2.36595e-09	1.92897e-08	27.7189	5.87948	28.9346	26.5032	5.435	6.32397
Stk36	453.093	-2.08353	1.93663e-21	4.32645e-20	11.4836	2.43295	11.9089	11.0583	2.44742	2.41848
Creg2	75.7355	-2.07833	5.03892e-05	0.000227292	1.52173	0.324371	1.20492	1.83854	0.308857	0.339885
Rnf144b	105.424	-2.07548	6.50282e-06	3.37429e-05	3.01151	0.638463	2.48146	3.54157	0.812608	0.464318
Lrig3	62.8185	-2.0752	0.00107503	0.00379261	2.08103	0.448017	2.6576	1.50445	0.207201	0.688833
Pcgf6	1448.44	-2.07494	3.56878e-40	2.16581e-38	40.0921	8.5331	42.8368	37.3474	9.18976	7.87645
Zfr2	83.6865	-2.07335	1.28365e-05	6.37057e-05	3.21599	0.685806	2.91672	3.51526	0.721758	0.649854
Srebf2	8016.58	-2.07325	1.19274e-10	1.11926e-09	191.147	40.8936	154.819	227.475	36.1405	45.6467
Gpr157	371.643	-2.07287	1.0565e-17	1.80284e-16	5.25578	1.12069	5.61885	4.8927	1.16611	1.07528
Flnb	1230.81	-2.06913	1.58665e-33	7.06871e-32	18.0427	3.86305	15.8965	20.1888	3.96635	3.75975
Igbp1	297.327	-2.06878	6.74502e-15	9.24472e-14	26.2521	5.62841	27.8761	24.6281	5.22656	6.03027
Atcay	181.161	-2.06622	4.61609e-10	4.10512e-09	6.26018	1.3429	5.7455	6.77486	1.35841	1.32739
Sec16a	1335.89	-2.06522	9.0906e-34	4.08936e-32	18.8534	4.05381	16.5354	21.1714	3.80513	4.30248
Clip3	627.247	-2.06277	8.24346e-23	2.02341e-21	25.0035	5.36783	22.7003	27.3067	5.90672	4.82893
Got2	1907.06	-2.06236	4.34735e-42	2.91361e-40	106.988	23.0386	95.5749	118.4	22.1346	23.9426
Pctp	1688.95	-2.06147	5.07778e-43	3.48393e-41	79.527	17.0845	81.1867	77.8672	18.75	15.419
Sox8	116.572	-2.05964	8.4017e-07	4.9773e-06	5.19619	1.12467	4.52308	5.8693	0.941194	1.30814
Gm33222	81.7572	-2.05832	9.10735e-05	0.000392727	5.6863	1.21529	6.72974	4.64287	1.66187	0.768707
Pdha1	2734.51	-2.05793	1.95946e-63	2.68086e-61	128.145	27.6551	125.132	131.158	27.3086	28.0016
4831440E17Rik	137.979	-2.05586	8.00756e-08	5.38856e-07	3.9502	0.852817	4.57113	3.32927	0.848184	0.857451
Flt1	617.585	-2.05573	1.61318e-25	4.67418e-24	6.00327	1.29946	5.9157	6.09083	1.19217	1.40675
Sptb	549.424	-2.05318	3.10981e-15	4.38712e-14	7.05759	1.53444	5.54647	8.56871	1.24039	1.82849
Plxnb1	304.141	-2.05288	6.91931e-15	9.47797e-14	3.40391	0.737811	3.16072	3.6471	0.709088	0.766534
Usp4	8797.96	-2.05093	6.8364e-50	6.19888e-48	236.844	51.4344	239.676	234.013	42.8292	60.0397
Stk35os1	39.39	-2.04328	0.00273953	0.00887115	1.70014	0.371958	1.52642	1.87386	0.320847	0.423069
Sipa1	3124.34	-2.04179	1.89373e-47	1.55272e-45	106.545	23.2891	107.221	105.868	20.0121	26.5661
Ube2a	850.681	-2.04103	1.41819e-31	5.69297e-30	65.5504	14.3239	62.6971	68.4036	13.6983	14.9495
Auh	530.194	-2.04037	4.17623e-19	7.98039e-18	9.99487	2.18542	11.4442	8.54557	1.9594	2.41143
Cerox1	144.361	-2.0397	5.78232e-06	3.02897e-05	13.0592	2.88165	11.411	14.7074	1.50193	4.26136
Rbm47	68.3445	-2.03882	0.000409967	0.00157489	1.61292	0.348976	1.91197	1.31387	0.497996	0.199955
Crmp1	81.169	-2.03876	5.01206e-05	0.000226213	3.15476	0.685089	3.00378	3.30575	0.888098	0.48208
Lamc2	210.21	-2.03855	2.56914e-11	2.59292e-10	5.29506	1.15662	5.4665	5.12363	1.19469	1.11854
Atg14	5127.13	-2.03717	1.16093e-78	2.55649e-76	198.225	43.3942	194.717	201.733	43.0845	43.7039
Notch1	305.494	-2.03573	2.78778e-10	2.52775e-09	4.2882	0.945761	3.55049	5.02592	0.651206	1.24032
Acot13	2727.04	-2.03528	8.2562e-64	1.13631e-61	530.334	116.231	533.673	526.995	115.543	116.918
Gm5540	77.9021	-2.03498	0.0001469	0.00060926	3.49523	0.773165	2.83256	4.15789	0.488529	1.0578
Lypla2	2262.07	-2.03427	4.0325e-44	2.90466e-42	184.419	40.4921	165.163	203.675	38.9137	42.0706
Adamts10	403.395	-2.03351	0.00288216	0.00929706	9.99	2.20468	7.92318	12.0568	1.24829	3.16106
Bst1	34.1227	-2.03124	0.00763916	0.0222207	1.93711	0.422188	1.60059	2.27364	0.584579	0.259797
Bin2	2506.08	-2.03068	6.7977e-55	7.41399e-53	143.79	31.6521	139.921	147.66	29.4904	33.8138
Ccdc92b	43.2147	-2.03045	0.00182779	0.00614634	1.32926	0.292805	1.49619	1.16234	0.26391	0.321699
Rgl3	100.045	-2.02959	0.000160798	0.000662739	4.1222	0.917133	4.31105	3.93334	0.377661	1.4566
Gm30504	34.7163	-2.02892	0.00505819	0.0154092	1.81375	0.399746	1.56177	2.06574	0.38907	0.410422
Ppp1r18	506.832	-2.02535	0.000877807	0.00315705	5.69307	1.26271	4.26476	7.12137	0.824661	1.70076
Rcan2	72.2707	-2.02445	7.51072e-05	0.000329406	2.30848	0.510674	2.59756	2.01939	0.45714	0.564207
Trappc9	1093.93	-2.02181	3.9414e-32	1.63029e-30	19.804	4.38302	17.7709	21.8371	4.38983	4.37622
Wasf2	2056.18	-2.0211	5.76624e-37	2.97605e-35	47.0168	10.4268	41.3082	52.7254	9.48022	11.3733
Zfp972	34.3987	-2.01911	0.00510498	0.0155414	5.18645	1.1478	5.17635	5.19656	1.20954	1.08605
Zfp874b	172.066	-2.01846	1.1467e-08	8.67892e-08	3.96894	0.876066	3.78058	4.1573	1.05735	0.694785
Scd2	1565.33	-2.01753	5.32721e-27	1.67358e-25	38.1685	8.49763	34.0013	42.3358	6.82713	10.1681
Rhoh	290.318	-2.01459	9.27271e-14	1.15706e-12	6.13552	1.36678	6.51136	5.75967	1.22399	1.50956
Inpp4a	837.72	-2.01433	1.2498e-30	4.80829e-29	10.4197	2.31968	10.7394	10.1	2.1613	2.47806
Pim1	1535.66	-2.01324	1.88136e-38	1.06099e-36	75.2204	16.7723	76.3822	74.0586	14.6955	18.849
Nipbl	2410.4	-2.01248	1.64547e-58	1.97132e-56	28.0581	6.24535	28.5052	27.6109	6.30277	6.18793
Lzts1	2282.44	-2.01134	4.01267e-30	1.49406e-28	53.6184	11.9747	58.24	48.9968	9.445	14.5044
Naglu	215.516	-2.00951	1.27356e-09	1.07551e-08	11.5266	2.58176	9.44535	13.6079	2.21302	2.95051
Hspa1b	422.429	-2.00933	7.00812e-18	1.21836e-16	5.00754	1.1177	4.53851	5.47657	1.12308	1.11231
Capn10	1650.46	-2.00845	4.33927e-33	1.90024e-31	76.2146	17.0646	73.3112	79.1181	14.1597	19.9694
Nr2c1	211.642	-2.00393	1.48917e-10	1.38841e-09	5.40671	1.2132	5.92491	4.88851	1.08542	1.34098
Meak7	679.539	-2.00368	4.79552e-26	1.41793e-24	27.054	6.06654	25.598	28.51	5.83308	6.29999
Itga1	156.104	-2.00355	9.288e-09	7.09941e-08	3.46503	0.776729	3.52344	3.40662	0.752167	0.801291
LOC115488129	256.704	-2.00084	6.75713e-13	7.9068e-12	35.4014	7.94426	36.7458	34.057	7.92187	7.96664
Grb7	2020.12	-1.99913	1.19816e-46	9.45521e-45	63.1867	14.2214	62.4797	63.8937	12.9094	15.5334
Sp6	39.5078	-1.99444	0.00318312	0.0101742	1.43197	0.322889	1.59038	1.27356	0.312483	0.333295
Gm15421	125.396	-1.99413	2.61269e-07	1.65147e-06	20.538	4.63496	21.3883	19.6878	4.42656	4.84336
Barx1	99.7916	-1.99405	4.92219e-06	2.60258e-05	9.71886	2.19799	8.99171	10.446	1.96184	2.43413
Syce1l	228.879	-1.99353	9.01258e-11	8.53353e-10	33.6939	7.62606	36.247	31.1409	6.35024	8.90189
C1qtnf12	241.363	-1.99258	4.57164e-11	4.46392e-10	24.2266	5.49016	25.4481	23.0052	4.44674	6.53358
Rasa3	3185.38	-1.99008	6.55664e-50	5.96861e-48	100.446	22.745	92.3182	108.573	21.2777	24.2122
Ppm1b	162.928	-1.989	1.87557e-08	1.37717e-07	3.8181	0.860972	3.67433	3.96187	0.997752	0.724192
Ccdc174	1886.07	-1.9867	1.96152e-43	1.37438e-41	111.687	25.2881	120.871	102.503	26.2015	24.3747
Scamp5	2316.21	-1.9864	5.67108e-43	3.87949e-41	41.0985	9.33029	37.1323	45.0648	8.80124	9.85934
Cfi	25.4917	-1.98575	0.0187303	0.0490246	1.61936	0.365178	1.87038	1.36833	0.438225	0.292132
Scnn1a	125.715	-1.98485	8.1058e-06	4.14927e-05	2.9938	0.685276	3.05072	2.93689	0.398046	0.972506
Tek	133.504	-1.98453	2.03958e-07	1.30816e-06	3.59729	0.819278	3.68981	3.50476	0.698462	0.940094
Casp3	284.297	-1.9841	4.15684e-12	4.54442e-11	13.6318	3.08217	14.5043	12.7592	3.64194	2.5224
Gm34469	238.263	-1.98385	2.06673e-11	2.10608e-10	24.4714	5.57574	23.8493	25.0935	4.79387	6.35761
Pcbp4	1585.34	-1.9835	1.76346e-35	8.60226e-34	64.5844	14.6965	57.9287	71.2401	13.6421	15.751
Ccar2	639.898	-1.98239	1.96218e-18	3.54449e-17	19.8163	4.5229	17.4639	22.1687	3.67866	5.36715
Serinc5	2027.08	-1.9817	5.57241e-47	4.45831e-45	50.4499	11.4747	47.4566	53.4433	11.6891	11.2602
Scn11a	45.6612	-1.98097	0.00380483	0.0119662	1.01586	0.233876	0.955485	1.07623	0.115568	0.352185
Gm30061	70.1912	-1.98083	0.000140051	0.00058326	2.37788	0.541406	2.00114	2.75462	0.547005	0.535808
Arhgef17	659.438	-1.97959	1.34438e-20	2.83102e-19	8.51382	1.94619	8.56605	8.46159	1.57041	2.32198
Slc22a16	72.7691	-1.97836	0.000282917	0.00111708	4.21605	0.968584	4.80931	3.62279	0.601216	1.33595
Hmgcs2	85.5235	-1.97797	4.42942e-05	0.000201094	3.4312	0.785743	2.79756	4.06484	0.671627	0.899859
Lonp2	5314.26	-1.97705	3.09124e-67	4.67161e-65	238.997	54.521	230.16	247.835	56.5026	52.5394
Rnf24	341.646	-1.97701	2.56575e-13	3.10441e-12	8.12011	1.84961	6.99457	9.24565	2.06998	1.62925
Bod1l	565.885	-1.97604	2.14029e-20	4.43042e-19	7.07379	1.61066	7.13611	7.01146	1.82992	1.3914
Gm17353	204.445	-1.97404	5.65902e-09	4.43402e-08	14.1558	3.23291	17.3802	10.9314	3.23016	3.23566
Gm36619	142.126	-1.97392	1.42454e-07	9.30192e-07	16.8153	3.85864	15.2458	18.3847	3.34655	4.37073
Tecpr1	204.098	-1.97385	4.6939e-10	4.16791e-09	4.8673	1.11259	4.36157	5.37302	1.15587	1.06931
Mapkapk5	621.197	-1.9731	1.91073e-24	5.20989e-23	37.2151	8.50659	37.2279	37.2023	8.87949	8.13368
Hdc	204.607	-1.97305	6.89957e-10	6.00195e-09	10.2046	2.34406	9.76458	10.6447	1.95757	2.73056
Hs1bp3	337.693	-1.97224	4.40526e-15	6.14345e-14	14.8592	3.40468	13.7675	15.9509	3.32679	3.48257
Bag3	520.586	-1.97088	2.57802e-19	5.01338e-18	26.5101	6.09355	25.5112	27.509	5.23283	6.95428
Cyp2s1	27.0317	-1.96903	0.0154038	0.0412279	1.36195	0.313681	1.43339	1.29051	0.261757	0.365606
Plgrkt	99.5546	-1.96856	5.65537e-06	2.96718e-05	5.02345	1.15514	4.70261	5.34429	1.07817	1.23211
Ptprm	147.186	-1.96839	3.61519e-07	2.24645e-06	3.41392	0.785378	4.1107	2.71713	0.668837	0.901919
Nradd	745.451	-1.96787	2.8079e-28	9.43667e-27	84.6393	19.4364	84.2981	84.9805	19.3996	19.4733
Atp1b1	1429.6	-1.96734	4.8751e-28	1.6219e-26	72.9048	16.8012	69.3093	76.5002	13.6081	19.9943
Phf19	124.384	-1.9671	1.29375e-05	6.41107e-05	3.97554	0.921569	3.37614	4.57494	0.55455	1.28859
Cd86	37.1018	-1.96638	0.0102685	0.028937	1.42139	0.330186	1.7741	1.06868	0.154831	0.50554
Arsa	32.6246	-1.96575	0.0131633	0.0359851	1.23103	0.285634	0.781348	1.6807	0.196674	0.374594
Pip4p2	262.225	-1.96542	5.06958e-12	5.50065e-11	15.1837	3.50118	13.8712	16.4961	3.17865	3.8237
Cnksr1	151.336	-1.96523	2.30408e-06	1.28157e-05	7.93326	1.81058	9.37208	6.49444	2.44725	1.17391
Ptpn3	491.941	-1.96358	7.78553e-18	1.34844e-16	9.40779	2.1742	8.87603	9.93954	1.83479	2.51361
Sptbn2	1466.91	-1.96321	6.07269e-29	2.10514e-27	17.8277	4.11593	15.2372	20.4182	3.75922	4.47264
Wipf1	194.164	-1.95807	8.83258e-09	6.76248e-08	4.14218	0.962816	3.81728	4.46708	0.740656	1.18498
Tifa	67.2685	-1.95528	0.00024069	0.000960681	2.54329	0.592408	2.41085	2.67572	0.459564	0.725253
Mogat2	94.3976	-1.95283	4.32856e-05	0.000196747	6.48492	1.49564	5.68268	7.28716	1.94692	1.04435
Cgrrf1	546.786	-1.95166	4.38805e-17	7.14007e-16	50.1103	11.686	49.1133	51.1072	9.1248	14.2471
Parp3	131.183	-1.95164	8.78297e-06	4.4682e-05	5.23302	1.22097	3.50947	6.95658	1.04092	1.40102
Gm31579	910.24	-1.94993	3.34438e-30	1.25128e-28	94.8222	22.0239	99.9837	89.6607	22.8381	21.2098
Nckap5l	351.868	-1.94946	1.00154e-09	8.54527e-09	9.17639	2.14111	6.12395	12.2288	1.96618	2.31605
Prkcq	707.557	-1.94824	3.57717e-26	1.06862e-24	22.4829	5.24002	22.3101	22.6556	4.93009	5.54995
Slc25a24	537.823	-1.94808	4.97927e-20	1.01258e-18	10.4794	2.4426	11.3753	9.58345	2.24375	2.64144
Clic1	1209.59	-1.94737	2.41364e-27	7.77274e-26	34.3791	8.02998	35.3658	33.3925	6.58219	9.47777
Itgb5	341.34	-1.94703	4.34558e-14	5.56051e-13	12.9353	3.00476	13.9604	11.9102	3.35402	2.6555
Acrbp	665.087	-1.94238	3.99772e-25	1.12043e-23	40.6619	9.51161	41.6521	39.6716	9.06668	9.95654
Tbc1d10c	177.488	-1.94208	2.77419e-07	1.74781e-06	6.34178	1.49238	6.84383	5.83973	0.973267	2.01149
Scmh1	1403.79	-1.94138	1.41476e-41	9.3197e-40	15.7501	3.68448	15.6929	15.8073	3.64698	3.72198
Ppef2	39.6389	-1.94135	0.00388371	0.0121762	1.33183	0.311607	1.22335	1.4403	0.311616	0.311597
Ceacam20	55.0322	-1.94056	0.00118764	0.00414875	2.44331	0.570092	1.89093	2.99569	0.669415	0.470768
Pm20d1	47.0141	-1.93942	0.00272139	0.00882031	1.35909	0.321086	1.3454	1.37279	0.201287	0.440886
Fxyd6	1057.69	-1.93918	1.03873e-30	4.02978e-29	55.5175	13.0322	55.1659	55.8691	11.5633	14.5011
Gm5828	33.0191	-1.93881	0.0086473	0.024773	2.33842	0.547824	2.69518	1.98166	0.533193	0.562454
Arhgap45	299.417	-1.93739	1.53874e-12	1.75092e-11	8.86709	2.0814	7.6876	10.0466	2.06183	2.10097
Zfp42-ps1	51.2536	-1.93672	0.001111	0.00390641	4.71214	1.10426	4.43049	4.99379	1.17284	1.03569
Fmn1	371.42	-1.93188	2.75531e-15	3.90131e-14	3.1235	0.733541	3.261	2.986	0.809495	0.657587
Avil	36.1699	-1.93166	0.0134592	0.0366381	1.09194	0.255598	0.627198	1.55668	0.350828	0.160369
Gtpbp2	321.217	-1.93073	5.97082e-13	7.04373e-12	8.4304	1.98331	9.67462	7.18617	2.05401	1.91261
Clec10a	185.814	-1.9305	2.12906e-09	1.74568e-08	8.13557	1.92038	8.1776	8.09354	1.77886	2.0619
Prkar2a	253.045	-1.93023	8.46879e-11	8.045e-10	6.68849	1.58219	7.16013	6.21684	1.28859	1.87579
Entpd1	52.6677	-1.92965	0.000958743	0.0034173	1.39574	0.329573	1.44173	1.34975	0.307611	0.351534
Trim61	96.3947	-1.9295	0.000112138	0.000475668	5.6926	1.32986	6.01941	5.36579	1.9166	0.743126
Tmem198b	187.352	-1.92941	1.95109e-09	1.61061e-08	5.46493	1.2873	5.7237	5.20616	1.33689	1.2377
Mapkapk3	376.719	-1.92759	5.81223e-16	8.68716e-15	13.8851	3.27549	13.3587	14.4115	3.44525	3.10573
St14	367.465	-1.92647	5.97265e-16	8.92116e-15	11.5334	2.72773	11.1859	11.881	2.64318	2.81227
Plekhg6	34.0407	-1.92557	0.00766918	0.0222968	1.08246	0.255955	1.01746	1.14746	0.258602	0.253309
Capg	1140.96	-1.92516	1.54389e-33	6.90481e-32	75.8649	17.9443	71.5562	80.1736	18.2318	17.6568
Blnk	104.963	-1.92512	4.70867e-06	2.50227e-05	7.72997	1.83057	7.35972	8.10021	1.75423	1.90692
Hhex	888.198	-1.9229	4.75277e-28	1.58348e-26	32.9152	7.80113	30.4917	35.3388	7.77522	7.82704
Stat3	5353.86	-1.91778	4.12084e-51	3.88906e-49	153.566	36.5676	151.391	155.74	32.1562	40.979
LOC115489738	49.3026	-1.91609	0.00157487	0.00537241	11.4163	2.71007	12.3519	10.4807	2.96001	2.46012
Runx1	398.259	-1.91577	7.30521e-16	1.08415e-14	7.08553	1.68314	7.54399	6.62707	1.83016	1.53611
Tfe3	1540.43	-1.91556	4.92998e-35	2.34549e-33	52.3478	12.4699	47.2748	57.4209	12.5564	12.3833
Igsf9	1120.9	-1.91434	4.6517e-23	1.16656e-21	29.2412	6.99335	27.2346	31.2478	5.58795	8.39875
Bmf	528.609	-1.91181	1.97856e-17	3.30075e-16	13.4114	3.19597	12.0871	14.7358	3.57367	2.81826
Mpzl1	7953.56	-1.91056	4.47828e-73	8.28374e-71	441.678	105.558	460.188	423.169	101.781	109.336
Prkab1	1501.96	-1.91004	3.82117e-41	2.48183e-39	92.4235	22.1079	93.4148	91.4322	21.1313	23.0844
Mbl2	187.334	-1.90983	2.64745e-09	2.14637e-08	20.2688	4.8505	19.4804	21.0573	4.66167	5.03933
Gm8488	36.6496	-1.90693	0.00672696	0.0198495	2.16804	0.521757	2.29754	2.03854	0.413483	0.63003
Wnt5b	150.834	-1.90473	1.47662e-07	9.623e-07	6.72024	1.60929	6.12044	7.32003	1.76508	1.4535
Ptcd2	1377.02	-1.90439	2.76678e-39	1.61549e-37	107.673	25.8491	109.9	105.446	25.0497	26.6486
Gm36235	139.486	-1.90381	2.23224e-07	1.42328e-06	10.1915	2.44337	10.608	9.77512	2.55285	2.33389
Smpdl3b	326.495	-1.90351	3.27309e-13	3.92533e-12	22.2202	5.31876	22.5185	21.9219	6.06338	4.57414
Slc16a13	172.166	-1.9027	4.0417e-08	2.83963e-07	3.30962	0.795922	2.81668	3.80257	0.784737	0.807108
Traf5	39.8044	-1.90267	0.00473752	0.0145164	1.18603	0.283852	1.15713	1.21492	0.329723	0.237981
Cbx6	253.018	-1.9022	2.22683e-09	1.82261e-08	6.07244	1.46797	5.58761	6.55727	1.06402	1.87192
Kdm4b	391.879	-1.90158	3.35019e-16	5.11646e-15	8.82504	2.11904	8.77452	8.87556	2.24375	1.99432
Crb3	213.505	-1.89831	4.41833e-10	3.93531e-09	22.644	5.46218	24.1356	21.1525	5.13118	5.79319
Lmf1	124.843	-1.89786	0.00016545	0.000679974	7.75796	1.89063	6.38613	9.12979	0.835133	2.94613
Rilpl1	415.974	-1.89429	2.14489e-15	3.06894e-14	22.6587	5.49208	21.1422	24.1752	4.76996	6.21419
Dedd2	942.658	-1.89274	1.37424e-26	4.23668e-25	14.5498	3.52816	14.4691	14.6305	3.07204	3.98427
Mapk3	1035.26	-1.89228	2.69917e-31	1.0705e-29	76.3698	18.5055	77.0079	75.7317	17.1346	19.8763
Usp11	2191.34	-1.89016	5.50596e-38	2.98147e-36	77.6964	18.8008	75.7013	79.6915	20.9035	16.6981
Gm38999	219.386	-1.88924	1.88316e-08	1.38186e-07	18.1973	4.39578	22.2846	14.1101	4.97948	3.81207
Egflam	69.0981	-1.88731	0.000854792	0.00308146	1.26592	0.304419	1.35221	1.17963	0.437943	0.170894
Arhgef4	92.3753	-1.88698	7.41583e-05	0.000325615	1.49222	0.359947	1.67486	1.30959	0.46155	0.258344
Mageh1	74.193	-1.8858	0.000575549	0.00214955	6.93372	1.67212	6.0116	7.85583	2.34647	0.997773
Entpd3	80.0469	-1.88555	0.000101278	0.000433257	3.02748	0.738515	3.26654	2.78843	0.618608	0.858423
Irf2bpl	1340.49	-1.88479	1.2608e-05	6.26929e-05	42.5065	10.3731	32.1634	52.8495	8.53412	12.212
Gm40694	28.1349	-1.88428	0.0184912	0.0484536	4.6154	1.12124	5.5499	3.68089	1.14862	1.09386
Nova2	141.929	-1.88294	5.16279e-07	3.14142e-06	2.21143	0.540856	2.09575	2.32711	0.446499	0.635213
Spata13	1040.63	-1.88288	1.91646e-20	3.98851e-19	9.63194	2.34626	7.775	11.4889	2.496	2.19653
Gripap1	1109.72	-1.88196	3.74067e-25	1.04966e-23	31.3797	7.66815	32.6443	30.115	6.34628	8.99001
Il17rd	983.147	-1.88048	2.60415e-24	7.00154e-23	15.5163	3.79354	13.661	17.3716	3.47182	4.11527
Gramd3	795.532	-1.88042	7.82395e-27	2.44137e-25	34.7848	8.49115	33.723	35.8465	8.33437	8.64792
Serp2	325.899	-1.87943	6.0334e-14	7.6357e-13	34.7512	8.48504	36.439	33.0634	8.35175	8.61833
2310039L15Rik	64.674	-1.87927	0.000444783	0.0016941	13.156	3.19979	14.0093	12.3027	3.68367	2.7159
Kif19a	73.9936	-1.87793	0.000478593	0.00181381	2.1763	0.527363	2.42253	1.93008	0.721152	0.333574
Gba2	527.424	-1.87721	2.41129e-15	3.43947e-14	19.3254	4.74577	18.0106	20.6401	3.73181	5.75974
Trafd1	2530.86	-1.87689	6.59e-41	4.22088e-39	88.9376	21.7913	83.7561	94.1191	19.6374	23.9452
Sort1	788.893	-1.87633	1.59331e-26	4.86022e-25	14.371	3.51844	13.9244	14.8175	3.43177	3.60511
Cited2	158.86	-1.8752	2.92497e-07	1.8383e-06	10.5295	2.56537	10.8204	10.2385	3.13829	1.99244
Plekhg5	1681.69	-1.8745	3.18994e-27	1.01316e-25	46.1757	11.309	39.3232	53.0281	12.2189	10.3992
Gm32391	29.6532	-1.87297	0.0176456	0.0464905	1.657	0.408726	1.92756	1.38644	0.294294	0.523157
Lhx2	139.452	-1.87265	7.10244e-06	3.66405e-05	4.98761	1.22336	3.48449	6.49074	1.32073	1.12599
Ubash3b	394.827	-1.87135	1.39883e-14	1.86634e-13	6.81519	1.67587	7.52536	6.10503	1.50495	1.8468
Vangl2	260.937	-1.86948	2.73801e-10	2.4856e-09	4.13795	1.01678	3.48402	4.79187	1.07788	0.955693
Bdkrb2	122.145	-1.86874	2.09445e-06	1.1708e-05	3.61237	0.888992	3.96459	3.26014	0.848217	0.929766
Zfp59	332.109	-1.86873	3.42444e-12	3.77048e-11	5.66684	1.39972	5.51701	5.81666	1.11982	1.67962
Gm7367	47.153	-1.86761	0.00241481	0.0079098	4.38351	1.08123	4.52536	4.24166	0.98014	1.18232
Gm31616	123.029	-1.86737	3.50979e-06	1.89744e-05	12.7593	3.15646	12.512	13.0066	2.49226	3.82066
Zfp775	235.552	-1.86728	9.04667e-10	7.76456e-09	12.1624	3.00124	10.4146	13.9102	2.7851	3.21737
Kdm5c	543.075	-1.86596	7.08732e-15	9.69663e-14	6.38864	1.58007	5.35439	7.42289	1.33862	1.82152
Adgrl3	298.064	-1.86591	7.87418e-11	7.511e-10	2.18938	0.541876	1.91922	2.45955	0.443733	0.640019
Plekha4	176.038	-1.86531	3.58026e-08	2.53701e-07	5.4492	1.34218	6.18138	4.71703	1.35904	1.32531
Bmt2	141.735	-1.86485	6.42332e-07	3.85066e-06	4.24017	1.04922	4.55676	3.92359	0.876466	1.22197
Bcat2	369.414	-1.86396	2.56811e-10	2.34425e-09	13.0897	3.2465	14.4272	11.7522	2.22177	4.27122
Cd79a	87.5909	-1.86377	0.000103739	0.000443047	11.3955	2.79519	12.5812	10.2098	3.50223	2.08815
Zfp618	357.043	-1.86364	7.15556e-11	6.86803e-10	4.45625	1.1061	4.08973	4.82277	0.798095	1.4141
Ada	48.7291	-1.86309	0.00277607	0.00897362	3.71749	0.924138	3.41783	4.01715	0.671546	1.17673
Ccdc114	512.349	-1.86221	5.10015e-18	8.98823e-17	14.9271	3.68061	14.6683	15.1859	4.06366	3.29756
Kbtbd2	700.128	-1.85857	4.66547e-21	1.01961e-19	20.1377	4.99836	21.4823	18.7931	4.36845	5.62827
Gas2l3	698.205	-1.85756	1.10821e-18	2.04502e-17	12.9362	3.21086	14.7883	11.0842	2.83472	3.58701
Hoxc9	73.0584	-1.85749	0.000401878	0.00154742	5.52256	1.37886	5.57519	5.46992	0.93196	1.82577
Zmat4	652.896	-1.85735	1.78342e-20	3.72505e-19	3.97445	0.987976	3.86989	4.07902	0.857365	1.11859
Stat5a	1552.52	-1.85671	9.83402e-32	3.98217e-30	44.0007	10.9382	43.2813	44.7201	9.44656	12.4299
Nos1ap	198.362	-1.85626	5.41869e-07	3.28589e-06	2.85551	0.713143	2.2486	3.46243	0.507681	0.918605
2410141K09Rik	1087.82	-1.8561	4.80633e-17	7.79327e-16	46.7758	11.6548	46.9202	46.6314	8.22685	15.0828
Wscd1	526.944	-1.85487	1.62529e-12	1.84486e-11	15.5506	3.88075	12.7701	18.3311	2.96549	4.79601
Rps6kb2	733.046	-1.8527	2.29345e-19	4.47126e-18	19.6472	4.90357	18.727	20.5674	4.01431	5.79284
Zfp444	957.286	-1.85118	9.0491e-24	2.35889e-22	27.4696	6.85782	25.4155	29.5237	5.95128	7.76436
Nr4a1	2317.62	-1.85101	7.07367e-38	3.82144e-36	73.8008	18.4133	71.697	75.9046	16.159	20.6677
Tnfrsf25	97.4679	-1.84721	0.000419713	0.00160912	4.96753	1.25232	3.48152	6.45355	0.720544	1.78409
Kdm2b	5904.91	-1.84695	5.11317e-40	3.07882e-38	115.157	28.8139	109.795	120.518	24.4244	33.2035
Oca2	47.4496	-1.84612	0.00311007	0.00996274	1.87001	0.46578	2.21231	1.5277	0.508738	0.422821
Bnc2	2230.33	-1.84452	5.98236e-48	4.99365e-46	21.0348	5.26405	21.142	20.9276	5.09951	5.42859
Camta2	836.632	-1.84425	0.00164459	0.00558552	10.4393	2.624	8.3379	12.5407	1.68157	3.56643
Dpysl2	5452.14	-1.84295	1.61678e-08	1.19549e-07	140.721	35.2739	159.998	121.444	28.2743	42.2735
Ly6h	58.2618	-1.84265	0.00117227	0.00410001	1.98817	0.495622	1.86047	2.11587	0.601637	0.389608
Map2k7	4439.03	-1.83861	5.21026e-35	2.46363e-33	154.218	38.823	143.293	165.142	32.572	45.074
Hif3a	103.055	-1.83739	1.61383e-05	7.89235e-05	1.81596	0.455252	1.80272	1.82921	0.507824	0.402681
Tpp1	294.795	-1.83728	1.51303e-12	1.72252e-11	10.1374	2.54891	10.3808	9.894	2.50853	2.58929
Gm15522	31.2312	-1.83675	0.0149089	0.0400482	5.01526	1.26108	5.74807	4.28246	1.2274	1.29476
F8	141.881	-1.83451	1.11839e-05	5.60941e-05	1.47475	0.373511	1.75541	1.1941	0.250765	0.496257
Rora	925.234	-1.83428	5.53601e-21	1.19854e-19	2.34875	0.593515	2.41188	2.28563	0.478245	0.708784
Hoxc13	45.1967	-1.83257	0.00387006	0.0121367	2.40451	0.609168	2.21194	2.59707	0.501686	0.71665
Abtb1	2873.01	-1.83242	1.46754e-44	1.07722e-42	162.523	41.0549	160.674	164.372	37.1111	44.9988
Faim2	51.857	-1.83226	0.0145484	0.0392244	1.36207	0.348644	1.28784	1.4363	0.0774808	0.619808
Abtb2	956.816	-1.82632	6.36633e-22	1.46908e-20	27.1598	6.87277	23.9699	30.3497	7.54842	6.19712
Actn2	267.773	-1.82517	3.26415e-09	2.62152e-08	11.5829	2.95126	12.2006	10.9652	2.14248	3.76004
Slc25a5	2208.58	-1.8248	2.21471e-35	1.07355e-33	220.725	56.0671	228.621	212.83	48.718	63.4162
Armcx4	95.2377	-1.82452	0.0003231	0.00126344	1.32868	0.337322	0.804434	1.85293	0.354404	0.320239
Sdr42e1	190.48	-1.82365	8.45645e-09	6.48524e-08	7.98749	2.02526	7.93112	8.04386	2.10125	1.94927
Gm39854	49.2385	-1.82354	0.00411386	0.0128022	15.0822	3.8607	15.5478	14.6167	2.35009	5.37131
Susd4	2766.81	-1.82353	1.34425e-38	7.65563e-37	97.8352	24.8696	89.2033	106.467	22.9676	26.7716
Ddx3x	3137.66	-1.8235	1.13029e-48	9.64375e-47	79.6031	20.1863	83.807	75.3992	20.9783	19.3943
Lipa	521.693	-1.82195	4.23464e-19	8.08533e-18	22.7163	5.77357	23.1015	22.3312	5.64903	5.8981
Vash2	287.03	-1.8203	2.60034e-11	2.62326e-10	8.2127	2.08601	7.5532	8.8722	2.26212	1.90991
Fam3c	642.581	-1.81978	1.55951e-21	3.51453e-20	25.2876	6.42701	25.8596	24.7156	6.75379	6.10024
Hivep1	179.996	-1.81946	2.53234e-08	1.82863e-07	2.06055	0.525448	2.06286	2.05824	0.479626	0.57127
Gm18412	67.4337	-1.81628	0.000628764	0.00233284	9.21714	2.36407	9.43944	8.99483	1.77601	2.95214
Dstn	10474.4	-1.81567	3.01641e-75	6.06483e-73	712.44	181.811	709.159	715.72	182.287	181.335
Zfp646	1239.06	-1.81537	2.21787e-23	5.63533e-22	24.204	6.19096	20.625	27.783	5.66761	6.7143
Skida1	225.036	-1.81499	3.01692e-08	2.16034e-07	6.65895	1.70973	6.38703	6.93086	1.24144	2.17801
Abcb6	5031.04	-1.81471	3.20622e-60	4.05106e-58	213.597	54.5789	208.251	218.943	52.5464	56.6114
Atg2a	1783.26	-1.81463	9.64499e-05	0.000414288	17.823	4.56707	13.2273	22.4187	3.67017	5.46397
Shb	317.357	-1.814	2.74868e-12	3.04821e-11	14.9505	3.82061	16.4959	13.4051	3.66981	3.97141
Cracr2b	443.544	-1.81379	5.04713e-12	5.47886e-11	21.602	5.49412	24.3702	18.8339	6.72112	4.26711
Cpn1	71.682	-1.8133	0.0003173	0.00124328	5.03156	1.2875	5.446	4.61712	1.20171	1.37329
Myo1h	87.5908	-1.81073	0.000106481	0.000453668	2.19917	0.564195	1.85092	2.54743	0.534518	0.593872
Celf3	113.931	-1.80926	1.09468e-05	5.49408e-05	1.4638	0.374315	1.65633	1.27128	0.401953	0.346676
Gprin2	121.658	-1.80802	2.72041e-05	0.000127978	1.28689	0.331945	0.986581	1.5872	0.263061	0.40083
Aff4	249.802	-1.80771	1.64388e-07	1.0662e-06	3.10923	0.792373	3.40776	2.81069	1.07261	0.512135
Tmem218	828.383	-1.80771	2.57958e-25	7.32741e-24	93.2437	23.9003	94.7385	91.7489	25.0745	22.7262
Rbm10	2116.74	-1.80505	4.63766e-06	2.46567e-05	70.9566	18.2937	68.5676	73.3456	13.1838	23.4037
Nme5	67.2738	-1.8049	0.000494168	0.00186793	6.81267	1.74931	6.48099	7.14435	1.85629	1.64233
Sh2b1	1443.84	-1.80448	2.64842e-27	8.50511e-26	30.3975	7.83123	26.765	34.03	7.27617	8.38629
Ttc38	605.187	-1.8041	2.61167e-20	5.39171e-19	19.7152	5.0787	19.366	20.0643	4.74028	5.41712
Ptprq	97.5579	-1.80397	3.89988e-05	0.000178349	1.2421	0.32062	1.27369	1.21051	0.271138	0.370102
Rap1gap2	124.577	-1.8028	1.27678e-05	6.33919e-05	1.82203	0.47094	1.44847	2.19559	0.407214	0.534667
Chst10	1556.76	-1.80215	1.66979e-28	5.63633e-27	61.7524	15.9461	60.1792	63.3256	13.544	18.3481
Slc35f2	3034.21	-1.80153	4.80803e-37	2.49823e-35	129.953	33.5552	126.379	133.526	28.9944	38.1161
Heg1	1623	-1.80083	2.26881e-30	8.55781e-29	22.0961	5.69328	24.8667	19.3254	5.67448	5.71207
Dusp10	324.037	-1.79866	1.55356e-09	1.29727e-08	14.0252	3.64053	14.7343	13.3161	2.53694	4.74411
Dpp9	664.563	-1.79828	3.59382e-14	4.62417e-13	18.2313	4.7305	17.4607	19.0018	3.44472	6.01628
Med25	3734.82	-1.79673	1.24788e-07	8.2051e-07	89.7783	23.2684	71.7109	107.846	20.4184	26.1183
Cers3	173.243	-1.79536	1.3744e-07	8.99484e-07	6.20886	1.60121	6.37401	6.04371	1.84515	1.35727
Gxylt2	560.9	-1.7946	2.15684e-17	3.5878e-16	9.39036	2.43661	9.98278	8.79793	2.13149	2.74174
Fcsk	756.506	-1.79457	1.82756e-15	2.63119e-14	23.9413	6.20764	18.5709	29.3117	6.17432	6.24096
Fkbp11	188.591	-1.79374	2.16611e-08	1.57499e-07	25.6668	6.66428	25.0933	26.2403	6.04817	7.28039
9930014A18Rik	43.0897	-1.79365	0.0110614	0.0308567	1.08394	0.281474	1.55203	0.615855	0.223063	0.339885
Ctxn3	43.054	-1.79165	0.00796951	0.0230512	2.09327	0.538529	2.03005	2.1565	0.7482	0.328859
D5Ertd579e	1066.42	-1.79033	1.51358e-21	3.41767e-20	18.0051	4.69093	17.0565	18.9536	3.84441	5.53744
Gm42346	369.195	-1.79005	8.60334e-14	1.07702e-12	25.0131	6.48944	26.7196	23.3066	6.74188	6.237
Taok3	815.509	-1.78999	2.11339e-25	6.08542e-24	15.6951	4.07775	15.5203	15.87	4.04936	4.10614
Acvr1b	679.405	-1.78826	7.54575e-18	1.30887e-16	19.7957	5.1637	17.8581	21.7332	4.46005	5.86734
Sfrp2	2018.23	-1.78634	3.88457e-26	1.15449e-24	71.4629	18.6638	66.0669	76.8589	15.3584	21.9692
Dock1	1129.6	-1.78507	2.40584e-29	8.6513e-28	21.3261	5.56088	22.6518	20.0004	5.33957	5.78218
Echdc2	319.746	-1.78487	1.85435e-12	2.09254e-11	21.8038	5.68008	20.8733	22.7342	5.90561	5.45455
Mnt	249.345	-1.78442	2.11903e-07	1.35535e-06	4.9442	1.29468	3.47366	6.41475	1.10784	1.48152
Ptpdc1	273.35	-1.78334	2.3998e-08	1.73835e-07	7.17783	1.86229	7.29541	7.06024	2.44382	1.28076
Igflr1	73.4369	-1.78317	0.000383616	0.00148228	7.96894	2.07208	8.4537	7.48417	2.37997	1.76419
Ubr1	99.333	-1.78239	0.000431954	0.00165058	1.58678	0.418465	1.40395	1.76961	0.218399	0.618532
Plcg2	3976.92	-1.78119	2.04765e-31	8.17715e-30	118.482	31.0363	117.417	119.547	25.2524	36.8203
Lrrc74b	105.348	-1.77995	4.84628e-05	0.000219159	3.45454	0.908846	3.22001	3.68906	0.682009	1.13568
Fbxo10	1934.43	-1.77983	5.12689e-20	1.03895e-18	41.5867	10.9106	32.7732	50.4002	9.48164	12.3396
Farp2	691.223	-1.77744	1.83223e-20	3.82353e-19	22.6896	5.9476	20.7859	24.5934	5.96728	5.92791
Gm21029	62.235	-1.77709	0.00143542	0.0049353	7.1716	1.88974	5.89505	8.44815	1.50793	2.27155
Gm19680	109.557	-1.77677	3.32187e-05	0.000153678	9.13138	2.39188	7.46786	10.7949	2.57594	2.20782
2410003I16Rik	184.654	-1.77654	8.9891e-08	6.00537e-07	6.44761	1.69391	7.17179	5.72344	1.49258	1.89523
Agpat4	213.806	-1.7765	1.1436e-07	7.55067e-07	11.7807	3.10064	13.5619	9.99953	2.38808	3.81321
Rab36	950.336	-1.77604	1.03763e-27	3.40795e-26	25.4494	6.67825	25.2706	25.6283	6.52167	6.83483
Tmem108	321.867	-1.77595	3.30831e-11	3.29577e-10	6.80198	1.78939	6.00988	7.59408	1.58304	1.99573
Mospd2	86.7443	-1.77363	0.000320216	0.00125343	2.61995	0.683364	2.94331	2.29659	0.895815	0.470914
Htr3b	98.2921	-1.77342	4.75451e-05	0.000215093	5.23604	1.37185	5.13694	5.33514	1.55043	1.19326
Kank2	2164.98	-1.77226	1.21177e-26	3.75081e-25	57.2202	15.087	50.8742	63.5662	12.8744	17.2996
Zrsr1	967.881	-1.77175	6.07928e-22	1.40565e-20	27.6658	7.2903	30.2631	25.0685	6.35164	8.22896
Rhox5	65.5777	-1.7676	0.000928405	0.00332351	5.02048	1.33051	5.32553	4.71543	1.04753	1.61349
Lactb	112.193	-1.76716	1.85812e-05	8.98067e-05	7.05272	1.85457	7.401	6.70444	2.12948	1.57966
Khnyn	336.963	-1.76693	7.65396e-12	8.15176e-11	7.03183	1.85208	6.57326	7.49041	2.0729	1.63126
Ccdc184	50.7327	-1.76675	0.00799537	0.0231231	2.79124	0.732306	1.83591	3.74658	1.01542	0.449191
Foxo6	59.4543	-1.76652	0.00161601	0.00549897	2.86644	0.75998	3.15948	2.57339	0.602271	0.917689
Itm2c	3689.51	-1.76576	1.35559e-50	1.26387e-48	233.733	61.8013	231.69	235.776	58.0449	65.5576
Usp10	1721.68	-1.76229	9.45436e-29	3.24338e-27	34.3587	9.11973	33.4731	35.2443	7.78324	10.4562
Abhd6	629.633	-1.76115	4.98684e-17	8.07463e-16	7.45098	1.98055	7.61318	7.28877	1.64188	2.31923
B4galt3	952.412	-1.76089	3.7498e-23	9.46538e-22	61.0526	16.2213	58.667	63.4382	14.2037	18.2389
Gm35953	60.0412	-1.7598	0.00236836	0.00776977	2.44538	0.643502	2.57439	2.31637	0.871858	0.415145
Hdgfl1	398.05	-1.75918	8.07624e-11	7.68473e-10	25.5528	6.81522	24.623	26.4825	4.97361	8.65683
A830005F24Rik	140.838	-1.75902	4.81261e-06	2.55106e-05	23.5709	6.22436	23.868	23.2737	7.6686	4.78013
Cpm	202.131	-1.75836	1.07888e-07	7.1376e-07	4.84638	1.29308	4.87424	4.81851	0.985923	1.60024
2810032G03Rik	66.0377	-1.75764	0.00137274	0.00473174	4.14727	1.09514	3.7222	4.57234	1.42104	0.769239
Mcu	138.593	-1.75754	2.29745e-06	1.27819e-05	4.61399	1.22584	4.14143	5.08655	1.24997	1.20171
Ezh1	6804.07	-1.7565	2.17246e-62	2.92044e-60	206.855	55.025	208.527	205.183	52.6334	57.4165
Inafm2	1961.07	-1.75551	0.000599558	0.002232	82.3924	21.8459	107.672	57.1128	25.7874	17.9044
Tns3	1025.07	-1.75486	6.02283e-14	7.62939e-13	13.4359	3.59295	12.4115	14.4602	2.47804	4.70787
B2m	634.661	-1.75481	7.14759e-18	1.24167e-16	94.7466	25.2315	105.942	83.5511	23.7398	26.7231
Dkkl1	275.542	-1.75396	2.12764e-09	1.74514e-08	29.7748	7.95036	33.9678	25.5819	6.63091	9.26982
Xpot	6679.14	-1.75383	5.39562e-51	5.07144e-49	138.312	36.885	132.242	144.382	34.0387	39.7314
Plxdc1	49.7013	-1.75323	0.00367533	0.0115936	1.79917	0.47744	1.83365	1.76468	0.560621	0.394259
Sall4	11885	-1.75318	4.06368e-71	6.85842e-69	276.244	73.6172	273.703	278.784	73.9876	73.2468
Cfap43	66.4146	-1.75243	0.00102322	0.00362866	1.34879	0.358371	1.58892	1.10866	0.398968	0.317773
Krt222	304.826	-1.75167	5.21022e-08	3.58971e-07	12.0605	3.23596	12.9063	11.2147	2.0765	4.39543
Skap1	174.972	-1.75086	1.4463e-07	9.44136e-07	8.81674	2.35948	8.80123	8.83225	2.07401	2.64495
Samd7	79.6525	-1.75005	0.000491399	0.00185838	3.13296	0.841128	3.53644	2.72947	0.609925	1.07233
Fam187b	205.381	-1.74797	1.15736e-08	8.75673e-08	9.82583	2.62463	10.2559	9.39575	2.73882	2.51043
1700019C18Rik	65.9095	-1.74736	0.00128394	0.00445018	20.5526	5.47556	17.6212	23.484	6.69842	4.2527
Patj	1587.7	-1.74643	1.94096e-30	7.34514e-29	17.058	4.57582	16.5168	17.5993	4.07252	5.07911
Sik1	438.862	-1.74581	1.17626e-12	1.34842e-11	12.3899	3.32863	10.6434	14.1364	2.91792	3.73933
Tacc1	1452.89	-1.74566	3.93318e-32	1.6298e-30	19.528	5.23696	20.1297	18.9262	4.83665	5.63726
Tstd2	392.033	-1.74538	1.2857e-13	1.58803e-12	11.3206	3.0298	10.6934	11.9479	3.22318	2.83642
Capsl	225.741	-1.74346	5.06961e-09	3.99385e-08	24.6263	6.60661	27.1737	22.0789	6.44409	6.76913
B3gnt2	625.108	-1.74319	5.61371e-14	7.13187e-13	28.3302	7.63388	28.0183	28.6421	5.73917	9.52859
Mink1	1575.69	-1.74272	4.85401e-30	1.79863e-28	17.5631	4.72269	16.434	18.6923	4.30146	5.14393
Kcnh2	106.202	-1.74258	0.000126499	0.000531801	2.62641	0.704353	1.91447	3.33835	0.783574	0.625131
Mageb16-ps1	33.5297	-1.74188	0.0168095	0.0445925	1.22947	0.331754	1.24915	1.20978	0.26291	0.400599
Nphp3	122.184	-1.73944	0.000420485	0.00161181	2.43185	0.647847	2.59275	2.27095	0.997224	0.29847
Sorcs3	125.219	-1.73929	6.18665e-05	0.000275728	2.83311	0.767912	2.3684	3.29782	0.514542	1.02128
Rpap3	3312.76	-1.73863	6.64018e-46	5.15216e-44	184.101	49.6074	177.772	190.43	46.7623	52.4525
Plekhh2	324.971	-1.7374	6.57206e-12	7.0482e-11	5.34972	1.44325	5.0124	5.68704	1.36808	1.51843
Tmem120b	866.899	-1.73696	1.14869e-21	2.60904e-20	37.9558	10.2068	39.6027	36.3089	11.298	9.11554
Kdm3a	7241.91	-1.73578	1.2351e-57	1.44232e-55	177.825	47.9942	181.197	174.453	44.9683	51.0202
AA414768	37.3694	-1.73528	0.0158532	0.0423151	2.85437	0.777012	2.95945	2.74929	0.457086	1.09694
Gpx1	3257.97	-1.73508	8.74428e-48	7.24678e-46	397.771	107.414	386.031	409.512	103.372	111.457
Zfp248	712.654	-1.7327	1.95703e-19	3.82829e-18	23.0552	6.23428	20.82	25.2904	6.25245	6.21611
Pde9a	277.629	-1.73154	7.35408e-08	4.97487e-07	15.5021	4.21127	18.0996	12.9047	3.00476	5.41778
Scamp1	1547.2	-1.73138	3.60945e-29	1.27028e-27	44.444	12.0441	46.0758	42.8123	10.6184	13.4698
Zfp260	1222	-1.73089	1.08568e-22	2.63687e-21	40.4276	10.97	36.9754	43.8797	9.44683	12.4931
Gm6560	389.238	-1.7293	1.11372e-12	1.27862e-11	22.749	6.18094	23.4245	22.0735	5.24674	7.11514
Dhx57	456.471	-1.72795	5.65319e-15	7.80842e-14	9.52557	2.58348	8.81371	10.2374	2.61122	2.55573
Ptk7	9558.24	-1.72746	6.38199e-29	2.20574e-27	252.743	68.727	217.873	287.613	58.0394	79.4146
Gm46305	80.3601	-1.72695	0.000270428	0.00107088	8.01153	2.17872	8.01819	8.00488	1.96987	2.38757
Snap91	153.963	-1.72571	7.27435e-06	3.74188e-05	4.09099	1.11822	3.84766	4.33431	0.780395	1.45604
Lama1	130.906	-1.72475	1.19948e-05	5.98367e-05	1.65991	0.450372	1.40219	1.91764	0.501392	0.399353
Ap2a1	2168.31	-1.72473	0.00217068	0.00718135	72.4432	19.7712	49.7221	95.1643	14.8727	24.6698
Chd7	2193.56	-1.722	4.78569e-06	2.53854e-05	21.2733	5.8061	22.2892	20.2574	4.25756	7.35465
Sult4a1	1210.79	-1.71964	1.90989e-23	4.89585e-22	61.333	16.7719	59.7811	62.8849	14.2128	19.331
Zfp710	3247.9	-1.71941	4.77147e-33	2.08556e-31	67.5259	18.4587	64.1929	70.8589	15.9057	21.0116
Psmb9	119.361	-1.71831	1.90125e-05	9.15849e-05	4.36301	1.18986	5.01347	3.71255	1.20397	1.17575
Ppp1r32	218.867	-1.71758	5.96685e-09	4.65942e-08	14.9499	4.08305	14.8392	15.0606	4.09488	4.07123
Lurap1l	34.2148	-1.71748	0.0169303	0.0448769	2.56223	0.702362	2.73363	2.39082	0.583719	0.821005
Pygb	4704.17	-1.71743	2.87862e-35	1.39246e-33	155.846	42.6218	135.553	176.139	41.2446	43.9991
Serf1	3693.82	-1.71558	8.72842e-45	6.51028e-43	398.951	109.215	412.914	384.987	100.832	117.597
Ypel2	722.991	-1.7154	7.93969e-20	1.59221e-18	6.8759	1.87928	7.50762	6.24417	1.91517	1.8434
Jph4	154.044	-1.71329	8.67683e-06	4.42102e-05	4.3564	1.19806	3.3338	5.37901	1.03665	1.35946
Rusc2	523.994	-1.71151	4.63669e-11	4.52552e-10	5.11301	1.40349	3.79656	6.42945	1.46008	1.34691
Enpp5	1329.04	-1.7108	3.28751e-27	1.04271e-25	34.719	9.52139	38.246	31.192	9.58883	9.45395
Sgk3	7267.93	-1.7103	1.67624e-61	2.21474e-59	164.304	45.1239	162.562	166.046	43.8973	46.3505
Naa80	58.1631	-1.71025	0.00429409	0.0132969	4.93249	1.36313	5.95081	3.91417	0.86517	1.86109
Zfp955b	478.03	-1.71016	2.63257e-14	3.44289e-13	10.4573	2.87876	10.7365	10.1781	2.45581	3.30172
Ncam1	830.691	-1.70819	2.53508e-22	6.00575e-21	10.3115	2.8373	10.8803	9.7426	2.66016	3.01444
Mcts1	235.946	-1.70754	2.57415e-09	2.08987e-08	20.2005	5.55176	19.8213	20.5797	5.75755	5.34597
Phc1	1733.77	-1.70596	5.06104e-30	1.86935e-28	41.0544	11.289	39.898	42.2109	12.3875	10.1906
Stambpl1	55.4592	-1.70572	0.00356681	0.0112913	1.34195	0.371988	1.33553	1.34838	0.261857	0.482119
Hsbp1l1	33.6705	-1.70559	0.0177805	0.0468141	1.39828	0.384632	1.4937	1.30287	0.398889	0.370374
Pfkm	625.271	-1.70515	3.65365e-19	7.01658e-18	22.0434	6.0722	21.4492	22.6377	6.14198	6.00243
Gm19583	126.298	-1.70458	1.24943e-05	6.21544e-05	11.7307	3.24303	10.6858	12.7757	2.84822	3.63784
Gmpr	1473.75	-1.70396	1.17231e-32	5.03833e-31	96.158	26.5027	94.5192	97.7967	27.2456	25.7599
Idh2	176.059	-1.70322	1.12887e-06	6.56811e-06	4.02247	1.1139	4.44423	3.60071	0.878605	1.3492
Kctd18	4582.55	-1.70292	1.52536e-52	1.51371e-50	125.657	34.6783	121.865	129.449	34.7406	34.616
Tanc1	1223.1	-1.70207	2.33997e-26	7.05408e-25	10.1189	2.79358	9.32991	10.9079	2.87005	2.71711
Arl6ip5	789.494	-1.70168	5.7065e-16	8.54017e-15	74.8703	20.7213	84.2371	65.5035	17.0921	24.3506
Inppl1	1275.49	-1.70152	3.24046e-21	7.15626e-20	31.3745	8.68552	27.0859	35.6631	7.79895	9.57209
Nup210	1548.48	-1.70094	4.62253e-16	6.99491e-15	23.0025	6.37761	17.9917	28.0133	5.28496	7.47027
Zhx1	627.999	-1.69843	1.18879e-18	2.18498e-17	7.61797	2.10781	8.1106	7.12534	2.10735	2.10826
4930503B20Rik	109.794	-1.69793	4.45509e-05	0.00020218	4.02362	1.11813	4.1122	3.93504	0.926034	1.31023
Osbpl6	326.171	-1.69759	5.47337e-10	4.82115e-09	2.94075	0.815809	2.42363	3.45788	0.781713	0.849905
Ube2j1	2521.97	-1.69738	7.68506e-43	5.22629e-41	89.6214	24.8164	92.3684	86.8744	25.0659	24.5668
Gm2762	52.1111	-1.69696	0.00426912	0.0132249	2.82274	0.782747	2.30083	3.34464	0.782771	0.782723
Gm29758	97.0955	-1.69634	0.000161277	0.000664476	9.4128	2.62031	10.3142	8.51139	2.04133	3.19928
Pkm	26109.8	-1.6955	3.18066e-47	2.57144e-45	811.711	225.42	792.675	830.747	199.025	251.814
Trrap	3766.37	-1.69423	4.58287e-42	3.05375e-40	32.9924	9.17069	31.8467	34.1381	8.40492	9.93645
Lamb2	485.62	-1.69374	1.87195e-15	2.69007e-14	10.9123	3.03417	10.4326	11.3921	2.86806	3.20027
Phf21a	1946.22	-1.69355	1.30766e-30	5.00689e-29	21.4754	5.97555	21.3044	21.6465	5.24083	6.71027
Gm40977	118.359	-1.69354	3.57996e-05	0.000164728	17.0622	4.74305	20.1058	14.0187	4.33452	5.15157
Atp9a	2101.77	-1.69353	1.27117e-38	7.25731e-37	50.1545	13.9326	52.2279	48.0811	13.5402	14.325
Fam43a	780.071	-1.69324	9.70396e-21	2.06417e-19	32.1433	8.94511	31.2866	33	8.13734	9.75287
Mamstr	115.698	-1.69295	4.90133e-05	0.000221518	2.21546	0.618426	2.36193	2.06898	0.47269	0.764163
Gm10857	57.3187	-1.69086	0.00396149	0.0123881	2.60272	0.721072	3.3222	1.88325	0.818536	0.623608
Dapk2	2502.13	-1.68938	4.47137e-40	2.6994e-38	179.225	49.8815	186.616	171.833	51.6634	48.0995
Hmgcs1	12589.2	-1.68919	6.0098e-49	5.18502e-47	434.02	120.792	469.502	398.539	126.655	114.928
Klc2	916.004	-1.68899	3.14886e-17	5.18206e-16	38.6974	10.8087	32.6884	44.7064	9.65376	11.9637
Lrrc61	97.0891	-1.68873	0.000377278	0.00145925	4.09526	1.14905	3.29618	4.89434	0.814549	1.48355
Ncmap	242.662	-1.68723	3.55088e-09	2.84194e-08	12.5597	3.50718	13.3765	11.7429	3.27348	3.74088
B020017C02Rik	1150.1	-1.68639	2.78494e-22	6.57748e-21	134.435	37.4635	126.136	142.735	41.842	33.0851
Sec1	381.466	-1.68482	1.8059e-09	1.49503e-08	14.3795	4.03875	12.8803	15.8788	2.95688	5.12062
Map10	908.052	-1.68476	5.41042e-23	1.34661e-21	32.3872	9.06415	32.0608	32.7136	8.29961	9.82868
Crtc3	423.351	-1.6824	5.74933e-14	7.29215e-13	10.3329	2.88944	10.8606	9.8053	2.97148	2.80739
Baiap3	116.941	-1.68196	0.000630209	0.00233633	2.46379	0.685554	1.7813	3.14627	0.978861	0.392247
Pkd2l1	1285.08	-1.68195	1.55115e-26	4.73788e-25	13.7363	3.85275	13.3399	14.1328	3.46879	4.23671
Atp1a1	2215.15	-1.67811	4.03125e-35	1.93383e-33	75.6336	21.2614	73.3628	77.9044	19.515	23.0079
Tarbp1	111.817	-1.67603	0.000162104	0.000667526	2.19459	0.616831	1.58195	2.80724	0.664299	0.569364
Ambra1	1324.54	-1.67533	8.77147e-17	1.3931e-15	31.6016	8.91399	25.3077	37.8955	7.75855	10.0694
Nr5a2	614.841	-1.67297	2.74316e-16	4.22567e-15	15.3104	4.32411	15.5379	15.083	3.71511	4.93312
Igf2	834.185	-1.67206	5.14286e-19	9.73102e-18	18.5466	5.21597	18.6152	18.478	5.90648	4.52547
Ccdc28b	241.439	-1.67117	2.04208e-08	1.48996e-07	14.9696	4.21432	17.1377	12.8014	4.45229	3.97635
Hk1	2918.02	-1.67082	1.4391e-30	5.49088e-29	68.8907	19.4653	60.6873	77.0941	18.2976	20.633
Ica1	2946.36	-1.67024	1.15639e-31	4.65819e-30	56.697	15.9809	63.3259	50.068	16.8676	15.0943
Mrtfa	1672.17	-1.66727	2.85933e-18	5.1211e-17	45.6323	12.9488	38.951	52.3137	10.5184	15.3792
Tdrd5	6728.07	-1.66719	4.80598e-53	4.83147e-51	120.178	33.9765	126.384	113.972	34.5388	33.4142
Mmp15	42.6916	-1.66672	0.0135419	0.0368199	1.24432	0.354431	0.921515	1.56713	0.264888	0.443974
Gm33205	145.774	-1.66632	7.1682e-06	3.69303e-05	5.18501	1.47293	4.61798	5.75204	1.2485	1.69736
Nab1	501.6	-1.6655	3.55496e-14	4.57672e-13	11.8242	3.33998	12.5392	11.1092	3.71753	2.96244
Gm32748	36.6602	-1.66518	0.0163978	0.0436257	8.34116	2.37038	7.58504	9.09728	2.06555	2.67521
Fos	4101.49	-1.66513	8.40937e-06	4.2942e-05	245.723	69.4439	305.441	186.005	76.1791	62.7087
Gm6992	58.5724	-1.66304	0.00306985	0.00984209	3.66917	1.04589	3.33597	4.00238	0.834573	1.2572
Fsip2l	917.195	-1.66136	1.64724e-19	3.23323e-18	51.8089	14.7477	53.7055	49.9123	12.5437	16.9517
Ifngr1	1517.73	-1.66091	4.98418e-32	2.04882e-30	90.61	25.7277	90.8251	90.395	26.4406	25.0148
Crtam	969.306	-1.66078	2.79539e-15	3.95564e-14	63.0086	17.9654	64.1401	61.877	13.4949	22.4358
Igfbpl1	233.355	-1.65938	8.92125e-08	5.96694e-07	10.7654	3.07288	9.31983	12.2109	2.59976	3.546
Prmt2	1340.69	-1.65878	2.3146e-25	6.61536e-24	76.7925	21.8898	77.5078	76.0771	19.2106	24.569
Gm18273	53.4151	-1.6578	0.00397221	0.0124132	5.39096	1.53565	5.8434	4.93853	1.46589	1.6054
Dpp7	266.382	-1.65694	4.03183e-08	2.83356e-07	19.593	5.60804	19.7652	19.4207	4.18869	7.02739
Neil1	84.8983	-1.6556	0.00093316	0.00333847	4.12234	1.18281	3.18918	5.0555	0.883981	1.48163
Cln8	396.809	-1.65225	5.84678e-13	6.90445e-12	7.04857	2.01357	7.44491	6.65224	2.02286	2.00429
Kcnu1	77.2402	-1.652	0.000612599	0.00227669	2.50443	0.717445	2.45041	2.55845	0.648671	0.786219
Gm20544	43.4749	-1.64948	0.0113793	0.0316622	2.02921	0.577617	1.96736	2.09106	0.735166	0.420069
Irf8	707.736	-1.64928	9.80174e-20	1.9504e-18	25.923	7.42389	25.2391	26.607	7.46219	7.38559
Map3k5	1122.37	-1.64818	1.28108e-26	3.95475e-25	19.4946	5.5896	20.0383	18.9509	5.40248	5.77673
Mbp	82.1553	-1.64808	0.000562268	0.00210232	1.48107	0.424259	1.25793	1.7042	0.448493	0.400025
Zmynd10	45.7777	-1.6467	0.00906825	0.02587	2.25378	0.643312	2.47851	2.02906	0.775402	0.511222
Gm27216	218.88	-1.64611	8.97233e-08	5.9959e-07	44.6483	12.8527	40.4509	48.8456	11.2698	14.4357
Gm17737	2955.6	-1.64411	1.38728e-39	8.26719e-38	84.8432	24.363	87.9909	81.6954	25.5627	23.1632
Ktn1	2056.93	-1.64384	1.45745e-32	6.25218e-31	36.445	10.4908	36.9593	35.9307	9.50504	11.4766
Galnt16	150.058	-1.64375	3.60136e-06	1.94421e-05	4.42481	1.27368	4.08313	4.76649	1.21745	1.32991
Akap12	1108.5	-1.64363	5.00105e-26	1.47681e-24	22.313	6.41104	23.0239	21.6022	6.56999	6.25209
Zscan18	1254.72	-1.64301	2.85939e-24	7.65219e-23	19.4957	5.6187	19.4512	19.5403	4.94247	6.29493
Clmp	127.641	-1.64246	5.27262e-05	0.000237047	1.89112	0.54727	1.73144	2.05079	0.405163	0.689377
Art5	185.746	-1.64217	6.27392e-07	3.76794e-06	13.1337	3.79216	12.1208	14.1465	3.26456	4.31975
Bend7	151.2	-1.64154	8.22978e-06	4.209e-05	4.60111	1.33087	4.59083	4.6114	1.03516	1.62658
Mfng	171.322	-1.64137	9.77668e-07	5.73311e-06	6.72182	1.93136	7.1536	6.29004	2.09464	1.76809
Gstt3	318.694	-1.64128	5.66654e-11	5.49588e-10	21.1493	6.08476	21.408	20.8907	6.32373	5.84578
Fgf12	122.341	-1.64103	3.20356e-05	0.000148681	1.8174	0.525112	1.90035	1.73446	0.442012	0.608212
Zfp988	1002.92	-1.64031	1.83332e-23	4.70477e-22	19.6746	5.67349	20.7492	18.6001	5.35895	5.98804
Stat2	854.707	-1.6392	3.18123e-16	4.86484e-15	23.9798	6.93774	24.129	23.8305	5.5392	8.33629
Bambi	1890.58	-1.63828	1.61208e-30	6.13068e-29	41.8145	12.0573	45.5016	38.1275	12.285	11.8297
Fam76a	2700.51	-1.63725	1.66218e-41	1.08875e-39	100.222	28.9531	102.26	98.1847	28.0217	29.8845
Casp9	2384.14	-1.63722	2.48273e-31	9.86354e-30	76.7653	22.208	74.8935	78.6371	19.6638	24.7522
Proser3	538.286	-1.6371	3.37786e-15	4.74502e-14	26.0237	7.50568	28.0248	24.0225	7.86652	7.14484
Gm6566	128.825	-1.63708	1.5195e-05	7.4515e-05	13.8335	3.99124	14.7442	12.9228	4.10779	3.87469
Vwa5b2	151.276	-1.63499	2.36055e-05	0.000112122	3.60506	1.04918	3.32103	3.88908	0.73953	1.35883
Plekhg2	2196.48	-1.63466	1.83169e-05	8.86033e-05	49.1018	14.2418	37.5509	60.6528	12.5309	15.9528
S100a10	170.083	-1.63444	9.01524e-07	5.31219e-06	32.8381	9.49794	31.1897	34.4865	9.74134	9.25454
Meiob	100.263	-1.63394	0.00013758	0.000574209	6.06029	1.74986	5.92751	6.19307	1.94667	1.55305
Glrx2	398.272	-1.63388	6.47141e-13	7.59938e-12	9.95606	2.88346	10.2191	9.69305	2.78045	2.98646
Vars2	1331.79	-1.63378	1.8668e-15	2.68434e-14	12.5294	3.63915	10.1814	14.8773	3.01188	4.26643
Cnot6l	1938.91	-1.63321	1.51201e-33	6.77535e-32	24.8643	7.20343	23.6318	26.0967	7.13515	7.27172
Vwa2	576.539	-1.63212	2.95426e-13	3.55588e-12	13.1299	3.81899	12.6662	13.5936	3.06203	4.57594
Med13l	1686.44	-1.63163	5.16586e-30	1.90502e-28	19.8422	5.74844	19.1045	20.5799	6.06752	5.42936
Maats1	119.048	-1.63102	6.05998e-05	0.000270552	4.97727	1.44723	4.18172	5.77282	1.32364	1.57082
Kcnk5	392.563	-1.63046	3.5591e-11	3.53798e-10	11.3019	3.28838	10.1445	12.4593	2.89167	3.68509
Elk1	786.475	-1.62881	2.46765e-12	2.74708e-11	27.7711	8.10271	25.2456	30.2967	5.93444	10.271
Syn2	224.304	-1.62804	5.13262e-08	3.53941e-07	4.88356	1.41567	5.02819	4.73893	1.57553	1.25581
Ephx2	241.57	-1.62648	3.78469e-07	2.34359e-06	11.6911	3.39613	9.34334	14.0388	3.86154	2.93072
Anxa6	237.604	-1.62561	1.82088e-08	1.33828e-07	11.152	3.25303	11.5138	10.7903	2.91436	3.5917
Cltb	1230.38	-1.62544	4.9698e-22	1.15838e-20	67.4637	19.6725	60.1002	74.8271	18.5041	20.8409
Arhgef1	4326.08	-1.62529	2.65878e-29	9.47248e-28	122.417	35.7196	111.181	133.653	31.0597	40.3795
Prx	74.7249	-1.62307	0.00180351	0.00607441	1.77109	0.52022	1.68976	1.85241	0.346828	0.693612
Rorc	191.231	-1.62229	4.00625e-07	2.47086e-06	6.7336	1.96792	7.27267	6.19453	1.77962	2.15623
Peg13	54.8493	-1.6219	0.00624802	0.0185982	1.45686	0.42226	1.60773	1.306	0.54918	0.295339
Dagla	222.745	-1.62093	0.000188489	0.000767703	4.46363	1.31127	2.22501	6.70226	1.04101	1.58154
Adamts17	275.694	-1.62091	1.55784e-08	1.15524e-07	3.87481	1.12807	3.67283	4.07679	1.32682	0.929325
Zfp677	480.799	-1.62071	2.1039e-12	2.35918e-11	20.3751	5.93896	23.1781	17.5722	6.39599	5.48193
Gm19497	74.2785	-1.62043	0.00143437	0.0049324	16.3431	4.79772	17.8797	14.8065	3.61997	5.97546
Daam2	160.064	-1.61951	3.13675e-06	1.70976e-05	1.86912	0.548095	1.86418	1.87406	0.469813	0.626378
Utrn	1739.27	-1.61823	3.87743e-29	1.35839e-27	10.0867	2.94841	9.84361	10.3298	3.1704	2.72641
Itgav	272.201	-1.61784	7.43527e-08	5.02832e-07	3.72527	1.08575	3.56157	3.88897	1.34248	0.829019
Nim1k	218.09	-1.61715	4.11864e-07	2.53612e-06	6.66055	1.94293	7.56438	5.75671	2.24977	1.63609
Vat1l	731.343	-1.6163	1.76231e-15	2.54199e-14	22.1955	6.52389	21.5743	22.8168	5.36846	7.67932
Arhgef18	1385.73	-1.61601	2.21848e-29	7.98998e-28	23.4337	6.87101	23.4844	23.3831	6.6606	7.08142
Resf1	3613.05	-1.61598	5.08527e-39	2.94691e-37	36.2972	10.6351	39.23	33.3644	10.4749	10.7952
Tdrp	289.086	-1.6151	1.4662e-09	1.22921e-08	11.8237	3.4722	10.852	12.7954	3.29407	3.65034
Zc3h4	349.249	-1.61424	1.08854e-06	6.34626e-06	4.8282	1.42439	3.299	6.3574	1.08161	1.76717
Npc1l1	53.4438	-1.61304	0.00597836	0.0178949	1.43324	0.421483	1.706	1.16049	0.375962	0.467005
Plin3	1994.67	-1.61299	2.82918e-27	9.03539e-26	115.522	33.8901	108.96	122.084	37.1721	30.608
Aldh6a1	610.229	-1.61296	3.27828e-11	3.26867e-10	20.3551	6.0012	21.729	18.9811	4.37499	7.62742
Phldb1	1300.03	-1.61079	3.39611e-18	6.05434e-17	17.1904	5.05612	14.329	20.0518	5.38681	4.72543
Sfrp1	1137.69	-1.61063	5.31839e-22	1.2359e-20	31.6555	9.33148	30.5489	32.7621	8.23859	10.4244
Parp8	1747.94	-1.60871	3.95122e-33	1.74019e-31	22.8147	6.72097	22.5614	23.068	6.68532	6.75662
Nfatc2	433.534	-1.6085	1.69505e-12	1.92028e-11	6.4664	1.90807	5.93433	6.99847	1.78578	2.03036
1300017J02Rik	83.0383	-1.60749	0.000818142	0.0029632	4.55069	1.33479	4.6843	4.41708	1.63808	1.03149
Numa1	5056.73	-1.60685	8.88764e-25	2.45227e-23	75.3	22.2541	62.8931	87.707	20.0527	24.4555
AU018091	113.134	-1.60464	0.000210794	0.000849275	2.04614	0.608241	1.99853	2.09375	0.420256	0.796226
Mbd6	354.208	-1.60382	4.40059e-08	3.07185e-07	8.5408	2.52584	6.25868	10.8229	2.64078	2.41091
Sh3tc2	103.267	-1.60264	0.000724894	0.00265803	2.12047	0.632171	1.76163	2.47931	0.402308	0.862035
Catsperd	102.699	-1.6017	0.000136585	0.000570469	2.95722	0.876508	2.82431	3.09014	0.827491	0.925525
Col17a1	67.9415	-1.60067	0.00255739	0.0083355	1.5307	0.455469	1.71692	1.34447	0.34432	0.566618
Klf6	1754.14	-1.60009	1.79012e-23	4.59903e-22	51.9472	15.3919	59.2462	44.6482	14.6171	16.1667
Apba2	628.277	-1.59991	3.11165e-14	4.042e-13	18.511	5.50298	18.0254	18.9966	4.55959	6.44637
Trim50	76.5565	-1.59967	0.00275608	0.00891648	5.08262	1.49399	5.24901	4.91623	2.10784	0.880142
Axl	335.897	-1.59896	1.51111e-09	1.26456e-08	7.93849	2.35415	6.73623	9.14076	2.4441	2.26421
Prkcz	1989.98	-1.59597	6.03708e-35	2.83718e-33	42.6127	12.6624	43.4682	41.7572	12.6011	12.7238
Gm7389	69.531	-1.59544	0.00168616	0.00570992	2.65125	0.789844	2.81809	2.48441	0.699886	0.879802
Zfp53	1052.15	-1.59374	2.38978e-24	6.46274e-23	12.2386	3.64144	12.3064	12.1709	3.68732	3.59557
Rnase6	268.64	-1.59327	1.21155e-08	9.12788e-08	13.5182	4.01583	14.8989	12.1375	4.33907	3.6926
Tceal1	45.3557	-1.59316	0.0114478	0.0318258	3.9643	1.18455	4.39432	3.53429	0.962957	1.40614
Rrad	405.733	-1.59184	9.46954e-10	8.10643e-09	31.5979	9.45045	34.1882	29.0076	7.295	11.6059
Wdr90	1662.96	-1.59174	0.000121965	0.000514329	34.1055	10.1974	27.1413	41.0698	8.09644	12.2984
Emc1	1752.15	-1.58746	6.09804e-19	1.1482e-17	34.9599	10.482	32.9659	36.9538	8.34185	12.6221
1700021F07Rik	95.1429	-1.58734	0.000253787	0.00100947	18.4774	5.52545	17.8265	19.1283	5.47462	5.57628
Ifi27	291.395	-1.58624	4.54569e-06	2.42067e-05	27.4032	8.25575	24.5923	30.2141	4.90503	11.6065
Hivep2	740.724	-1.58502	2.89578e-16	4.44892e-15	3.66378	1.09547	3.40784	3.91973	1.20682	0.984111
Tspan31	1607.28	-1.58402	2.84078e-29	1.01053e-27	111.109	33.3263	111.892	110.326	31.1508	35.5018
Bicd2	2569.49	-1.58342	8.53656e-35	3.9956e-33	47.534	14.2653	47.1158	47.9521	13.1816	15.3489
Unc5a	154.455	-1.58301	9.54205e-06	4.82676e-05	2.32485	0.698767	2.03541	2.61429	0.637424	0.76011
Pou6f1	340.992	-1.58226	4.30375e-09	3.42081e-08	7.92593	2.382	6.50887	9.34299	2.26894	2.49506
Cfap70	172.515	-1.58016	1.51926e-06	8.6801e-06	5.36752	1.6145	5.29479	5.44025	1.52728	1.70172
Entpd2	189.603	-1.57999	1.11567e-05	5.59819e-05	12.1519	3.67105	9.85741	14.4464	2.79629	4.5458
Fchsd1	1134.68	-1.57797	1.28951e-20	2.72045e-19	32.396	9.762	29.1259	35.6662	9.20501	10.319
Trp53inp2	1748.09	-1.57705	6.98288e-16	1.03832e-14	42.3142	12.7835	35.761	48.8674	10.2183	15.3488
Card6	406.348	-1.5769	3.66742e-11	3.63784e-10	9.1801	2.76511	8.09888	10.2613	2.80285	2.72736
Zfp640	199.703	-1.57589	3.63288e-06	1.96077e-05	18.6676	5.59637	20.4935	16.8417	6.93524	4.2575
Nphp4	758.074	-1.5751	1.49412e-13	1.83468e-12	9.25188	2.7976	7.82957	10.6742	2.42314	3.17207
Pik3ca	381.606	-1.57395	1.92397e-11	1.9684e-10	5.00308	1.51222	5.02733	4.97882	1.37709	1.64734
Ctdsp2	748.858	-1.57357	1.032e-18	1.91355e-17	18.3706	5.54039	19.0234	17.7177	5.69333	5.38746
Slc41a1	996.165	-1.57349	2.60016e-14	3.40243e-13	26.5238	8.03306	22.765	30.2826	6.58103	9.48508
Limk2	2766.07	-1.57299	1.95352e-39	1.15228e-37	51.9642	15.6916	51.4855	52.4428	15.6245	15.7587
Slc26a11	46.2304	-1.57244	0.0131136	0.0358831	1.48924	0.452778	1.4549	1.52359	0.316957	0.588598
Irgm2	113.99	-1.57191	0.000145791	0.000604985	2.0129	0.610948	2.03499	1.9908	0.477612	0.744284
Lsr	839.398	-1.5715	1.92086e-19	3.76072e-18	46.1515	13.9698	46.2635	46.0395	12.8047	15.135
Irak4	77.4588	-1.5711	0.00160477	0.00546554	2.98332	0.90365	3.56494	2.4017	0.780375	1.02692
Bmpr1b	306.141	-1.57005	3.94441e-08	2.77634e-07	4.94868	1.50325	4.24834	5.64903	1.23333	1.77316
Tle2	188.852	-1.56929	2.2724e-06	1.26487e-05	5.87399	1.77129	5.90804	5.83995	2.10159	1.441
Cish	248.271	-1.56824	3.02675e-07	1.89866e-06	7.16754	2.17805	5.92449	8.4106	1.91918	2.43691
Mmrn2	71.7628	-1.56812	0.00164766	0.00559513	2.26207	0.686828	2.19197	2.33218	0.620382	0.753274
Plekhg1	377.174	-1.5665	1.23379e-10	1.15462e-09	2.52313	0.763402	2.49168	2.55458	0.859474	0.667329
Slain1	282.122	-1.56639	2.34657e-09	1.91452e-08	11.6164	3.52292	11.5488	11.684	3.54473	3.50111
Rhox1	678.769	-1.56577	9.72725e-16	1.42984e-14	87.5792	26.6379	85.6117	89.5466	23.3388	29.9371
Zmiz2	675.663	-1.5657	5.13489e-16	7.72975e-15	8.36504	2.53654	7.79383	8.93626	2.68838	2.38469
Slc7a9	96.7693	-1.56559	0.000324805	0.00126968	5.23351	1.59284	4.95335	5.51368	1.39794	1.78773
Gm14412	63.6316	-1.56541	0.00827866	0.0238648	2.6046	0.793807	3.52326	1.68593	0.553173	1.03444
Nfkb1	57.9269	-1.56526	0.0147761	0.0397454	1.58108	0.474713	1.97366	1.1885	0.719852	0.229573
Ablim1	120.844	-1.564	0.00105157	0.00371838	1.18597	0.363516	1.17991	1.19202	0.181335	0.545698
Klk8	303.398	-1.56384	1.90361e-07	1.22401e-06	26.2335	7.93237	25.9951	26.472	10.154	5.71077
Pxk	884.054	-1.56291	6.5903e-20	1.32736e-18	31.9763	9.72355	34.1839	29.7686	9.4553	9.99181
Pcmtd2	1234.59	-1.56214	1.03569e-22	2.52077e-21	12.9361	3.94184	13.1676	12.7045	3.52097	4.36271
Slc25a4	3089.28	-1.55971	1.10033e-36	5.57935e-35	287.456	87.6371	301.582	273.33	82.9885	92.2856
Ubald2	1730.15	-1.55967	1.00705e-29	3.66693e-28	144.636	44.0732	139.284	149.988	44.7327	43.4137
Tnfsf9	45.3006	-1.55931	0.0169612	0.0449332	4.21568	1.28741	2.8845	5.54687	1.26285	1.31197
Col6a1	82.5655	-1.55867	0.00201216	0.00669043	2.57532	0.7798	2.55873	2.59191	1.05529	0.504313
Catsperg1	82.5002	-1.55852	0.000918921	0.00329262	1.51641	0.461215	1.65015	1.38268	0.508886	0.413545
Prr23a2	110.873	-1.55751	0.00019402	0.000787594	18.0183	5.52042	19.1559	16.8806	4.40506	6.63578
Ifit2	73.2204	-1.55634	0.0104422	0.0293549	2.07366	0.639354	2.49559	1.65172	0.261737	1.01697
Sbf1	3244.77	-1.55596	0.0146513	0.0394605	63.0024	19.3378	42.368	83.6368	13.5556	25.12
Iars2	3013.81	-1.5555	2.85831e-27	9.11583e-26	58.211	17.8253	56.9272	59.4947	15.2599	20.3906
Vamp3	3019.5	-1.55445	4.38082e-27	1.3819e-25	88.402	26.9885	91.4631	85.3408	30.4609	23.516
Nudt7	231.976	-1.55413	6.62653e-08	4.50908e-07	5.04342	1.54208	5.31942	4.76742	1.55361	1.53056
Mgrn1	2317.45	-1.55335	1.5852e-28	5.36646e-27	54.4619	16.6925	50.2492	58.6745	15.5648	17.8203
2700054A10Rik	141.947	-1.55223	2.13791e-05	0.000102218	4.03731	1.23817	3.62841	4.44621	1.19309	1.28324
Nrg4	140.686	-1.5497	6.26234e-05	0.000278602	5.24206	1.61577	4.4255	6.05863	1.31173	1.91981
Dhrs7b	1095.38	-1.54922	1.25201e-20	2.64374e-19	78.8963	24.2615	80.2046	77.588	21.4601	27.063
Bfsp1	265.504	-1.54921	1.82037e-08	1.33828e-07	7.78963	2.39303	8.42628	7.15299	2.24322	2.54285
Mtus2	209.784	-1.54915	2.34438e-07	1.49165e-06	3.13368	0.961347	3.14257	3.1248	0.985723	0.936971
Cetn1	135.369	-1.54878	6.4041e-05	0.000284487	15.9273	4.90972	17.3255	14.5291	3.84704	5.9724
Msmo1	4842.82	-1.54796	4.47407e-34	2.03641e-32	324.594	99.6043	353.351	295.836	105.464	93.7449
Cc2d1b	2120.28	-1.54749	7.05548e-26	2.07026e-24	32.3119	9.94771	29.8558	34.7679	8.99383	10.9016
Mier2	1339.57	-1.54738	4.18911e-17	6.82598e-16	31.6076	9.7404	27.2494	35.9659	8.42297	11.0578
Pllp	329.963	-1.54474	3.89046e-10	3.48663e-09	21.5916	6.6518	22.6354	20.5478	6.38086	6.92274
Zfp52	305.612	-1.54445	3.15063e-09	2.53475e-08	8.61683	2.6542	7.84161	9.39205	2.68165	2.62676
Slc6a6	2125.74	-1.54419	1.0622e-20	2.2491e-19	40.6898	12.5586	43.1801	38.1995	10.2788	14.8384
Pou2f2	316.21	-1.54384	6.38515e-10	5.57965e-09	3.63215	1.11865	3.74087	3.52342	1.1273	1.11001
Selenop	286.56	-1.54259	6.60582e-08	4.49631e-07	15.9738	4.90605	16.6521	15.2954	5.88151	3.93059
Pphln1	11533.6	-1.54252	1.97015e-40	1.22128e-38	106.875	32.9278	116.078	97.6722	34.4121	31.4435
Lama3	529.566	-1.54057	5.86398e-09	4.58529e-08	5.34808	1.64368	6.24277	4.45339	2.05577	1.2316
Galnt3	939.644	-1.54043	2.62883e-17	4.34169e-16	29.4202	9.08525	33.3025	25.5378	8.71693	9.45357
Wdr6	3865.99	-1.53975	7.34572e-25	2.0341e-23	115.289	35.6887	99.8809	130.698	32.3074	39.07
Zfp819	708.242	-1.53881	4.64508e-14	5.93062e-13	35.1502	10.8782	39.8669	30.4334	9.77732	11.979
Cacng8	43.7797	-1.53812	0.0146129	0.0393708	1.27642	0.39528	1.20198	1.35087	0.378554	0.412006
Dennd2a	418.815	-1.53774	7.34139e-12	7.82968e-11	10.1322	3.13245	9.81119	10.4533	3.2746	2.99031
Dennd1c	102.476	-1.53635	0.000532491	0.00199874	3.31084	1.03122	3.07252	3.54915	0.759877	1.30256
Dyrk1b	770.332	-1.53578	3.06848e-14	3.98816e-13	6.96797	2.1639	6.02623	7.90971	1.94805	2.37974
B430306N03Rik	105.948	-1.5357	0.000477855	0.00181131	1.66268	0.51472	1.29517	2.03019	0.563295	0.466146
Myadm	613.275	-1.53511	2.26725e-14	2.98539e-13	10.9349	3.38483	10.3566	11.5133	3.68262	3.08704
Emp2	286.631	-1.53507	7.56548e-09	5.83486e-08	10.2779	3.18384	9.62233	10.9335	3.32649	3.04118
Gm42081	536.636	-1.53485	2.07528e-12	2.33049e-11	37.5379	11.6608	40.7055	34.3703	10.0765	13.2451
Irgq	98.6121	-1.53423	0.00128099	0.00444062	1.98205	0.617497	1.37234	2.59175	0.5232	0.711793
Klhl35	242.297	-1.53348	1.31305e-07	8.60797e-07	5.69505	1.7644	5.28286	6.10724	1.93372	1.59507
Supt7l	1840.38	-1.53198	1.33518e-28	4.54e-27	84.7772	26.3125	84.0758	85.4786	27.842	24.7831
Hepacam	82.7096	-1.53109	0.00244941	0.00801178	3.06012	0.944884	3.68717	2.43307	1.21091	0.678853
Wdtc1	2781.38	-1.53024	1.10679e-18	2.04402e-17	71.6495	22.3484	62.7116	80.5874	18.2382	26.4586
Nfkbid	547.889	-1.52983	5.20626e-13	6.17013e-12	23.6211	7.36378	21.5977	25.6446	6.7022	8.02536
Spag16	168.679	-1.52874	4.5919e-06	2.44246e-05	3.81657	1.18799	4.11291	3.52022	1.17602	1.19995
Pde4b	114.974	-1.52644	0.000135616	0.000566628	1.95699	0.611714	1.8652	2.04878	0.548452	0.674976
Usf1	1345.18	-1.52638	1.26174e-13	1.55927e-12	67.0549	20.9901	60.0758	74.0341	15.8508	26.1294
Atp13a2	1415.8	-1.52536	1.12451e-17	1.91325e-16	34.4598	10.7728	28.9051	40.0144	10.1113	11.4343
Ice1	361.745	-1.52514	1.80827e-09	1.49645e-08	4.31838	1.34836	3.71145	4.92531	1.36902	1.32771
Hsd17b12	6327.55	-1.52498	4.01269e-42	2.69714e-40	423.781	132.38	434.27	413.293	122.873	141.887
Rhog	83.0974	-1.52148	0.00142728	0.00490948	8.0812	2.53909	7.05717	9.10523	2.11239	2.96579
Plekhm1	1794.52	-1.51996	2.76519e-19	5.35483e-18	36.8497	11.5615	30.9738	42.7257	10.9474	12.1755
Rab20	142.781	-1.51947	2.15868e-05	0.000103126	10.4384	3.27325	10.7757	10.1012	3.12766	3.41884
Cul7	2219.74	-1.51945	0.00105961	0.0037445	49.3174	15.5061	36.8406	61.7941	12.3904	18.6218
Usp54	1717.16	-1.51884	3.1201e-20	6.41271e-19	13.2133	4.14955	11.4415	14.9851	3.83993	4.45918
Lrrc55	351.009	-1.51806	1.4005e-08	1.04662e-07	7.06128	2.22379	7.06932	7.05324	1.72274	2.72483
Morc1	7541.43	-1.51777	1.78824e-48	1.52013e-46	304.164	95.4422	313.037	295.291	92.4706	98.4138
Pcyox1l	839.783	-1.51648	9.61772e-19	1.78763e-17	32.1512	10.1054	31.2242	33.0781	9.62207	10.5887
G2e3	9282.22	-1.51454	3.02913e-49	2.65301e-47	169.615	53.3593	165.791	173.438	51.5276	55.1909
Dhx37	697.919	-1.51415	1.35248e-13	1.66886e-12	17.168	5.40093	14.7206	19.6153	5.54624	5.25562
Eng	112.422	-1.51393	0.000730581	0.00267625	3.86185	1.22341	3.34346	4.38025	0.81157	1.63524
Adam19	110.967	-1.51371	0.000227562	0.000911915	2.02027	0.633844	2.2148	1.82573	0.69999	0.567698
Slc1a4	111.699	-1.51209	0.000177588	0.000726116	3.49679	1.102	3.75554	3.23805	1.04929	1.15471
Klc3	742.599	-1.51186	8.43361e-17	1.34206e-15	37.0605	11.6612	39.0905	35.0304	12.1726	11.1497
Lin52	568.304	-1.5117	1.48661e-11	1.53453e-10	32.5554	10.2904	33.0783	32.0326	8.21942	12.3614
Hykk	230.002	-1.5109	2.23261e-07	1.42328e-06	5.5347	1.74477	5.11411	5.95528	1.76405	1.7255
Dym	2540.35	-1.51038	3.81607e-29	1.34096e-27	71.3218	22.4986	65.4775	77.1661	22.6089	22.3882
Gm30062	58.9778	-1.51026	0.00841346	0.0242111	7.62841	2.38931	8.21709	7.03973	3.12851	1.6501
Ctr9	7481.24	-1.50988	9.39976e-36	4.66397e-34	213.671	67.4843	213.466	213.876	59.9124	75.0563
Gaa	7765.02	-1.50987	2.19851e-38	1.23085e-36	267.718	84.5464	252.756	282.68	78.3871	90.7058
Fgd1	276.675	-1.50919	3.57105e-08	2.53204e-07	8.0345	2.5388	7.20465	8.86434	2.43702	2.64058
Triml1	52.618	-1.509	0.0135878	0.036923	1.3198	0.413342	1.44316	1.19644	0.560023	0.266661
Fastkd1	517.657	-1.50839	9.64527e-14	1.2029e-12	22.2234	7.01885	22.0906	22.3563	6.93524	7.10246
Mob4	1692.63	-1.50811	2.30068e-27	7.42964e-26	73.5404	23.2111	72.3908	74.6899	24.2414	22.1807
Mgmt	1167.8	-1.50692	1.16198e-19	2.30423e-18	79.8275	25.1908	78.3596	81.2954	27.907	22.4747
Nptn	1159.32	-1.50679	9.3429e-20	1.86069e-18	54.0985	17.1302	49.942	58.2551	15.7566	18.5039
Nos1	457.853	-1.50632	4.00104e-10	3.5788e-09	5.80052	1.82775	6.0224	5.57863	2.17178	1.48373
Prrx2	141.848	-1.50565	3.34696e-05	0.000154746	11.833	3.73506	12.2702	11.3958	4.09424	3.37587
Socs5	1127.51	-1.50553	4.54033e-16	6.87501e-15	13.997	4.44111	12.6799	15.314	3.74565	5.13657
Cotl1	669.434	-1.50519	6.19869e-09	4.82417e-08	50.1334	15.7984	48.038	52.2288	20.8523	10.7446
Rest	12658.6	-1.50296	2.06205e-49	1.82677e-47	210.055	66.619	209.525	210.586	63.0054	70.2326
Gtpbp1	2414.82	-1.50207	4.94498e-24	1.30971e-22	68.9519	21.9125	64.2936	73.6103	19.1918	24.6331
Zfp146	100.118	-1.50186	0.00038861	0.00149957	4.22689	1.3388	4.33803	4.11574	1.41759	1.26001
Psmd7	8437.79	-1.5005	1.08249e-43	7.65422e-42	646.516	205.442	634.602	658.43	192.006	218.877
Osbpl10	719.591	-1.50041	4.09931e-13	4.87824e-12	8.83621	2.81214	7.59754	10.0749	2.5391	3.08518
Matk	237.127	-1.50029	1.11348e-07	7.36123e-07	10.0022	3.17527	10.0679	9.93648	3.20161	3.14893
En1	68.2221	-1.49562	0.00470759	0.0144343	3.27108	1.03902	2.71331	3.82886	1.22466	0.853371
Coch	297.482	-1.49476	8.47635e-09	6.49835e-08	10.1312	3.22755	9.61492	10.6474	3.3519	3.1032
Ssh1	727.09	-1.49057	5.60229e-12	6.03054e-11	9.76804	3.13409	9.46514	10.0709	2.43819	3.83
Tbc1d17	1180.47	-1.48916	1.37847e-18	2.51762e-17	55.1729	17.6269	53.0241	57.3218	19.6693	15.5846
Gm34639	71.0219	-1.48746	0.004002	0.0124928	2.80014	0.898502	3.37147	2.22881	0.786217	1.01079
Cnn3	10113.2	-1.48737	5.38536e-37	2.78569e-35	617.776	198.071	651.161	584.39	179.388	216.754
Ccdc13	100.489	-1.48474	0.000833299	0.00301196	2.32927	0.751075	1.97355	2.68498	0.608331	0.893819
Tfap2c	206.766	-1.48433	9.28961e-07	5.47107e-06	6.83114	2.19077	6.79247	6.8698	2.30862	2.07292
4933402J07Rik	66.227	-1.48388	0.0045467	0.0140116	7.92171	2.54071	9.1521	6.69133	2.61004	2.47139
Coa8	305.934	-1.48319	5.01646e-09	3.95737e-08	19.1802	6.16429	20.0371	18.3234	6.02476	6.30382
Rdm1	377.321	-1.48316	4.7029e-10	4.1743e-09	18.0484	5.8031	16.5108	19.5861	5.73501	5.8712
Renbp	869.213	-1.48141	4.98081e-15	6.92938e-14	74.9202	24.1436	81.7796	68.0608	20.928	27.3592
Rbak	602.146	-1.48094	1.01958e-14	1.37944e-13	21.1449	6.80335	21.8198	20.47	6.81766	6.78905
AI662270	427.12	-1.47973	4.56306e-11	4.45742e-10	9.24993	2.98488	9.28215	9.2177	2.69219	3.27758
Arid4a	372.456	-1.47839	1.09905e-09	9.34275e-09	5.19308	1.67855	5.13649	5.24967	1.45517	1.90194
Hip1r	1640.14	-1.47779	7.44751e-17	1.18924e-15	44.1981	14.2933	38.4972	49.8989	12.2175	16.3692
Acaa2	1416.84	-1.47576	3.19544e-24	8.52191e-23	115.269	37.2671	112.941	117.598	35.2449	39.2893
Tyk2	2179.71	-1.47532	0.000214214	0.000861549	47.9662	15.5451	39.1627	56.7697	12.2694	18.8209
2610044O15Rik8	179.107	-1.47422	1.53037e-05	7.50324e-05	12.2942	3.99157	11.3737	13.2147	3.2216	4.76154
Zfp541	223.414	-1.47329	6.94079e-06	3.58625e-05	4.86681	1.58087	5.43597	4.29765	1.18497	1.97677
Mmut	528.261	-1.47252	4.05557e-11	3.99204e-10	13.8298	4.46367	14.0738	13.5858	5.1873	3.74004
Frg2f1	108.869	-1.47222	0.000370849	0.00143583	6.95695	2.25778	7.53046	6.38345	1.95814	2.55741
Vasn	438.952	-1.4712	2.34327e-10	2.14239e-09	16.7736	5.44381	14.8182	18.7289	5.11933	5.76829
Mb21d2	1596.33	-1.47022	2.00246e-25	5.78037e-24	55.6146	18.0484	56.6179	54.6114	16.8923	19.2046
Pik3c2b	551.249	-1.47004	1.79616e-10	1.6566e-09	7.61762	2.47348	6.22289	9.01234	2.41482	2.53213
Cep104	637.572	-1.46997	3.16752e-15	4.46038e-14	14.8953	4.8319	14.9307	14.86	4.736	4.92781
Prkd2	189.617	-1.46904	6.16053e-06	3.21326e-05	5.98245	1.94756	5.61358	6.35133	1.65971	2.2354
1700012D01Rik	84.6951	-1.46854	0.00140052	0.00482319	14.8467	4.82956	14.1078	15.5856	4.39065	5.26846
Ddt	912.272	-1.46733	1.09078e-15	1.59814e-14	182.543	59.2139	171.411	193.676	65.8904	52.5373
Gng2	179.987	-1.46504	5.6503e-05	0.000253387	5.35702	1.7502	6.21246	4.50158	1.28575	2.21465
Gm36839	81.1626	-1.46434	0.0018839	0.00631573	9.76504	3.179	10.9163	8.61381	3.08765	3.27034
Gm34315	49.5955	-1.46363	0.0141574	0.0383087	9.13043	2.98413	8.5878	9.67306	2.53907	3.42918
Cd24a	545.04	-1.45928	7.26659e-10	6.30183e-09	36.5019	11.972	35.7239	37.2798	9.15787	14.7861
Septin9	685.074	-1.45907	1.00615e-12	1.16089e-11	15.1556	4.9651	13.6819	16.6294	4.33074	5.59947
Kcp	135.765	-1.45711	8.38098e-05	0.000364052	1.96742	0.643536	1.79229	2.14255	0.663687	0.623385
Gprasp1	2403.09	-1.4565	7.16874e-31	2.80466e-29	49.0396	16.0561	47.3083	50.7709	15.9898	16.1223
Usp15	4113.93	-1.45646	4.01793e-38	2.19628e-36	40.6393	13.2974	41.8442	39.4344	13.5478	13.047
Arhgef25	163.091	-1.45588	1.49268e-05	7.33245e-05	6.20205	2.02867	6.3374	6.06669	2.12241	1.93492
5930403N24Rik	112.507	-1.45413	0.000384443	0.00148523	4.42495	1.4459	4.76543	4.08447	1.65199	1.2398
Mocs1	263.459	-1.45345	2.45171e-06	1.36041e-05	11.6768	3.83555	8.96282	14.3908	3.78792	3.88317
Sympk	1847.99	-1.45275	2.26643e-27	7.32929e-26	41.5298	13.6234	43.2516	39.808	13.791	13.4558
Nexn	101.037	-1.45233	0.000536846	0.00201378	2.49479	0.819057	2.59065	2.39892	0.8058	0.832314
Kmt2c	2184.48	-1.45109	6.72262e-29	2.32001e-27	15.4995	5.09268	16.3323	14.6668	4.97896	5.2064
Tm6sf1	76.3899	-1.44976	0.00257257	0.00838024	3.40676	1.12061	3.19468	3.61885	1.12064	1.12057
Rsph3a	105.93	-1.4492	0.000439311	0.00167564	6.56753	2.16012	7.07122	6.06384	2.14072	2.17951
Lrrc34	52.7945	-1.4488	0.0155783	0.0416513	3.49099	1.14606	4.44731	2.53466	1.20236	1.08976
Myl9	269.643	-1.44877	9.56482e-08	6.36792e-07	27.9768	9.19018	28.2671	27.6864	9.96755	8.4128
Rasd1	62.7496	-1.44864	0.0131621	0.0359851	4.73711	1.54575	4.80492	4.66929	2.22565	0.865852
Robo1	2536.63	-1.44785	3.10734e-25	8.78335e-24	28.2519	9.31674	25.9854	30.5183	8.62497	10.0085
Glt8d1	1177.24	-1.44699	5.40694e-20	1.09474e-18	50.8272	16.7246	51.9429	49.7114	17.9532	15.496
Gm6781	149.131	-1.44654	5.48812e-05	0.000246353	10.8845	3.59223	12.0949	9.67402	3.25506	3.92941
Man2a1	386.323	-1.4465	3.95531e-10	3.54064e-09	6.66565	2.19614	7.09039	6.24092	2.20008	2.19221
Slc35d2	712.365	-1.44568	1.29914e-15	1.89399e-14	37.1279	12.2548	37.9527	36.3031	11.5955	12.9142
Got1	371.22	-1.44502	4.73793e-10	4.20378e-09	21.8914	7.22554	21.8155	21.9672	7.08014	7.37094
Cdc42ep4	1268.61	-1.44418	2.5401e-11	2.56809e-10	35.8861	11.8912	28.8759	42.8964	9.45582	14.3266
Mfsd13a	136.011	-1.444	9.16908e-05	0.000394947	7.23378	2.38675	7.94368	6.52388	2.40592	2.36758
Mindy1	846.75	-1.44366	9.35812e-18	1.6028e-16	29.883	9.86928	29.4628	30.3033	9.87434	9.86422
Tkt	1393.88	-1.4427	8.91966e-23	2.18244e-21	52.3906	17.3329	51.4472	53.3339	16.241	18.4249
Rps4x	953.114	-1.44098	3.88473e-18	6.91477e-17	84.5287	27.9941	80.4084	88.6489	26.843	29.1452
Pxt1	622.345	-1.43846	1.15929e-13	1.43958e-12	36.7652	12.2017	38.0821	35.4483	11.1903	13.213
Paox	500.607	-1.43659	2.33265e-11	2.36456e-10	21.4784	7.13015	19.4814	23.4753	7.18828	7.07202
Tnrc6c	4789.31	-1.4363	1.95397e-35	9.51153e-34	58.867	19.5532	55.6556	62.0784	19.0429	20.0634
Atf3	86.6928	-1.43627	0.00609947	0.0182047	5.31594	1.77495	6.67481	3.95707	1.08045	2.46945
Gm40557	87.5193	-1.43499	0.0105153	0.0295209	4.10889	1.37753	4.65939	3.5584	0.591606	2.16345
Dbndd2	2101.59	-1.43429	6.21753e-26	1.82903e-24	50.3462	16.7552	51.1791	49.5134	15.2847	18.2258
Sgsm2	313.016	-1.43371	2.12036e-08	1.54464e-07	7.47594	2.48637	6.8791	8.07278	2.51332	2.45942
Mapk10	3254.5	-1.43259	3.28547e-25	9.26421e-24	44.2242	14.7353	46.7736	41.6748	12.95	16.5206
Zmym6	1287.47	-1.43228	1.67641e-17	2.80883e-16	29.5269	9.81616	33.3866	25.6673	10.1784	9.4539
Cerk	300.049	-1.43077	1.2213e-05	6.08726e-05	7.66189	2.56526	8.72339	6.6004	1.67347	3.45706
Msantd4	1164.35	-1.42907	4.04827e-21	8.91468e-20	49.7797	16.6145	48.8175	50.7418	16.2549	16.974
Eloa	839.621	-1.42892	1.67056e-16	2.61698e-15	22.1302	7.38787	23.4071	20.8532	7.01075	7.76498
Tnks1bp1	704.618	-1.42856	5.96302e-08	4.08161e-07	10.2518	3.4302	6.96355	13.54	3.22614	3.63427
Pld3	2704.48	-1.4284	1.62046e-32	6.90022e-31	107.666	35.9462	106.397	108.935	35.3448	36.5475
Rbm24	66.4596	-1.42827	0.0146177	0.039379	2.27224	0.755307	1.50154	3.04294	0.99271	0.517904
Cubn	153.248	-1.42743	0.000138325	0.000576693	1.63899	0.544658	1.79014	1.48784	0.673621	0.415695
Rasal1	112.212	-1.42664	0.00041352	0.00158722	2.75827	0.919595	2.9195	2.59703	1.00705	0.832145
Slc43a3	783.366	-1.42428	1.93151e-16	3.00782e-15	28.3192	9.48025	27.7777	28.8607	9.4447	9.51581
Ptprg	909.642	-1.42414	2.54075e-13	3.07578e-12	11.6393	3.90183	9.77066	13.508	3.75821	4.04545
Hps4	639.254	-1.42411	2.09116e-14	2.75666e-13	20.5708	6.88913	20.8193	20.3222	6.7008	7.07746
Slc2a8	618.185	-1.42305	8.18477e-13	9.52912e-12	35.2615	11.8369	33.6932	36.8298	10.6255	13.0483
Nat8f1	134.077	-1.4223	0.000113177	0.000479547	10.3045	3.45931	10.1296	10.4794	3.20291	3.71571
4930477N07Rik	76.1165	-1.42213	0.00389917	0.0122197	13.4022	4.51163	13.7556	13.0488	3.55861	5.46466
Cnppd1	4352.87	-1.42151	1.1393e-30	4.40516e-29	189.997	63.7985	188.351	191.643	57.5189	70.0782
Sh2b3	1774.65	-1.42118	1.54214e-17	2.59326e-16	36.3835	12.2231	30.8633	41.9037	11.609	12.8372
Prkca	288.38	-1.42102	4.47865e-07	2.74319e-06	4.16667	1.39268	4.35157	3.98177	1.64991	1.13546
Nuggc	309.282	-1.4205	3.14442e-08	2.24746e-07	11.436	3.8371	12.471	10.4009	3.78054	3.89365
Gm12865	357.84	-1.42015	4.54656e-09	3.60143e-08	19.6489	6.60859	18.8075	20.4903	6.00171	7.21548
Hdac7	340.536	-1.41957	1.42106e-08	1.06061e-07	2.64175	0.888022	2.37826	2.90525	0.862838	0.913207
Cend1	277.992	-1.41847	1.34026e-07	8.78138e-07	18.1981	6.1072	19.6483	16.7478	6.40551	5.80888
Ifnlr1	66.2413	-1.41738	0.00579191	0.0173833	1.99404	0.670931	2.11315	1.87493	0.646505	0.695357
Gga1	1789.66	-1.41679	7.9932e-25	2.21075e-23	70.2936	23.6523	66.956	73.6312	23.9562	23.3484
Mcf2l	253.056	-1.41491	2.37389e-06	1.31787e-05	4.36885	1.47784	4.44205	4.29565	1.14644	1.80924
Cryz	849.324	-1.41447	1.06945e-12	1.23024e-11	35.699	12.0678	33.3017	38.0962	9.94478	14.1907
Irf1	2593.93	-1.41276	3.70189e-26	1.10161e-24	93.0885	31.4449	86.776	99.4009	29.6523	33.2375
Tsen15	700.807	-1.41208	8.24198e-13	9.5909e-12	74.5773	25.2391	73.1356	76.019	21.5464	28.9319
Gm30494	213.093	-1.41138	5.79563e-06	3.03525e-05	4.98964	1.68401	4.33907	5.64021	1.79308	1.57494
Tnrc18	630.619	-1.41089	1.76904e-09	1.46819e-08	3.93289	1.33402	3.47691	4.38888	1.03871	1.62933
Jhy	61.5041	-1.40991	0.00897253	0.0256317	1.60371	0.54089	1.46677	1.74065	0.610433	0.471347
Kdm6a	771.778	-1.40934	4.08473e-16	6.20138e-15	11.9226	4.03294	11.9122	11.933	3.98838	4.07751
Eps8	194.291	-1.40908	0.000196202	0.000795335	2.12681	0.723351	2.42993	1.82369	0.457185	0.989517
Ccdc97	1334.07	-1.40866	2.4534e-18	4.41116e-17	48.5081	16.434	43.6364	53.3799	15.6582	17.2098
Rhov	503.829	-1.40782	3.934e-11	3.88394e-10	34.7062	11.7484	31.8658	37.5466	12.0821	11.4147
Slc27a1	573.321	-1.40706	3.52598e-10	3.16735e-09	14.5119	4.92714	16.0075	13.0162	4.0691	5.78518
Sys1	3404.05	-1.40678	2.02463e-34	9.2884e-33	104.312	35.3385	107.18	101.444	35.1664	35.5106
Clcc1	2341.76	-1.40602	2.22703e-26	6.73116e-25	72.7087	24.6228	76.5508	68.8666	25.8222	23.4233
Dock6	718.997	-1.40549	6.37751e-10	5.57508e-09	10.1196	3.44287	8.24491	11.9944	2.91835	3.96738
Ube4b	12684	-1.40472	6.07519e-31	2.38895e-29	113.22	38.4668	110.708	115.733	33.7957	43.1379
Crybg1	582.525	-1.40316	1.56601e-10	1.45302e-09	8.74843	2.98116	8.37218	9.12468	2.43724	3.52508
Hadha	6815.67	-1.40095	1.51262e-38	8.59332e-37	301.978	102.762	288.913	315.042	102.101	103.422
Arhgef16	451.371	-1.40037	7.26882e-10	6.30183e-09	17.5643	5.96305	18.6745	16.4541	6.63049	5.29561
Vwa5a	519.32	-1.40001	1.18118e-10	1.10886e-09	15.0323	5.12909	15.5884	14.4763	4.38603	5.87215
Fdft1	9920.44	-1.3998	1.85404e-37	9.83236e-36	115.611	39.3457	124.451	106.772	39.1222	39.5692
Pus7l	1269	-1.39926	7.31629e-18	1.27003e-16	53.1132	18.1189	55.2845	50.9418	15.9209	20.3168
Fam3a	73.7567	-1.3991	0.00558269	0.0168186	3.49882	1.18633	3.94728	3.05035	1.41162	0.961044
Ica1l	294.848	-1.39888	4.53296e-08	3.15886e-07	4.12735	1.40597	4.16805	4.08665	1.40222	1.40973
1700001C19Rik	134.365	-1.39713	0.00022728	0.000911259	4.65775	1.5898	5.35073	3.96477	1.47214	1.70745
Zfp42	448.421	-1.39654	1.08553e-09	9.23116e-09	21.5639	7.37426	19.5587	23.569	6.65494	8.09358
Agbl2	132.898	-1.3964	0.000152775	0.000632493	2.57022	0.877335	2.46647	2.67398	0.871227	0.883443
Hdac8	268.744	-1.39597	2.36791e-07	1.5058e-06	1.70161	0.580743	1.82751	1.57571	0.574165	0.587321
Gcgr	66.9442	-1.39591	0.0141737	0.0383447	2.55992	0.881256	2.60524	2.51459	0.485754	1.27676
Foxo3	2690.43	-1.39541	2.08078e-26	6.29736e-25	47.6444	16.289	44.8932	50.3957	15.2755	17.3025
Sema4b	388.659	-1.39516	1.75307e-09	1.45546e-08	11.2447	3.846	10.737	11.7524	3.59951	4.09248
Map3k15	354.783	-1.39505	1.77088e-07	1.14385e-06	9.32766	3.1976	9.8037	8.85162	2.48619	3.90901
Sat1	626.497	-1.39468	3.0523e-13	3.67007e-12	33.28	11.3696	35.4279	31.1322	11.1871	11.5522
Ypel3	575.91	-1.39434	3.2186e-11	3.21055e-10	58.1296	19.8256	64.1968	52.0624	21.4399	18.2113
Gm32770	77.0337	-1.39405	0.00477322	0.0146103	6.71022	2.30197	7.47896	5.94147	1.82427	2.77967
Gsdme	254.446	-1.39387	7.7662e-07	4.61976e-06	8.6337	2.94965	9.62847	7.63894	2.94821	2.9511
Mthfd1l	170.798	-1.39358	4.30567e-05	0.000195783	4.40286	1.51073	4.3505	4.45523	1.24418	1.77728
Mfsd10	598.847	-1.3927	9.10266e-13	1.0537e-11	36.4927	12.4749	38.7102	34.2751	12.7984	12.1514
Rai1	457.845	-1.39189	1.35923e-09	1.14326e-08	3.55993	1.21601	3.38674	3.73313	1.37718	1.05485
Ccnl1	2040.02	-1.39182	1.95762e-24	5.33146e-23	23.8732	8.16441	25.1694	22.5769	8.56305	7.76578
Lrrfip2	583.3	-1.3918	9.39487e-07	5.52463e-06	10.013	3.41541	13.3991	6.62685	3.8606	2.97022
Spryd3	2153.34	-1.39153	5.68266e-16	8.51552e-15	104.336	35.8247	95.2009	113.471	29.1851	42.4644
Rilpl2	820.664	-1.39035	1.05523e-15	1.54817e-14	78.2233	26.8036	74.6574	81.7893	27.2456	26.3617
Stard8	349.294	-1.38985	4.97537e-06	2.62769e-05	6.70269	2.31022	6.67086	6.73453	1.51234	3.10811
Itgb3	1330.1	-1.38937	3.60448e-15	5.05414e-14	26.7572	9.19996	24.5779	28.9365	7.76175	10.6382
Saxo2	72.8902	-1.38929	0.00569578	0.0171319	1.72692	0.594798	1.74626	1.70757	0.466821	0.722775
Gm21028	144.505	-1.38923	8.66398e-05	0.000375288	13.0466	4.47796	12.9151	13.178	4.30193	4.65399
Retreg3	1953.14	-1.389	2.18163e-17	3.62643e-16	66.2843	22.7924	63.2373	69.3313	18.9155	26.6693
Gm5874	65.6445	-1.38704	0.00918294	0.0261617	7.38888	2.54795	6.16074	8.61701	2.14895	2.94694
Coro1b	3790.65	-1.38644	2.00743e-30	7.58427e-29	121.337	41.7383	117.671	125.003	38.8051	44.6715
Arhgef40	243.322	-1.38501	3.40178e-05	0.000157014	3.40886	1.17922	2.9392	3.87853	0.829504	1.52894
Mtr	14354.2	-1.38493	9.81992e-38	5.25593e-36	176.072	60.607	164.623	187.521	58.9066	62.3074
Atxn1	297.269	-1.38377	1.09223e-06	6.36616e-06	1.45519	0.500305	1.74854	1.16184	0.50676	0.493849
Kat2a	6283.7	-1.38231	3.16475e-24	8.45959e-23	224.924	77.5791	194.344	255.504	77.0395	78.1187
B4galt7	157.067	-1.38183	7.521e-05	0.000329794	8.18337	2.82634	7.34007	9.02667	2.62031	3.03236
Rab11b-ps2	365.79	-1.38114	5.27826e-08	3.63442e-07	25.3395	8.71144	25.8365	24.8425	10.1746	7.24826
Minar2	89.6804	-1.37957	0.00537015	0.0162503	4.83014	1.65574	4.76475	4.89553	2.29411	1.01737
Il10rb	208.607	-1.37917	5.05127e-05	0.00022776	11.5032	3.99385	11.4044	11.602	2.80986	5.17784
Bcas1	444.589	-1.37837	4.03815e-10	3.60786e-09	12.7845	4.41404	13.7896	11.7794	4.50042	4.32766
Rab5b	2751.75	-1.37812	1.4816e-23	3.82338e-22	98.0306	33.9027	88.1278	107.933	33.6283	34.1772
Trpd52l3	99.6598	-1.37763	0.00120714	0.00420987	5.35336	1.85376	5.71662	4.99009	1.67552	2.032
Gm5091	198.973	-1.37639	4.52036e-05	0.000204981	20.2065	7.02488	20.6344	19.7785	5.17643	8.87333
Klhdc3	10016.7	-1.3763	5.43255e-32	2.22715e-30	506.984	175.649	476.602	537.366	161.571	189.726
Tbcd	1229.95	-1.37609	1.33157e-19	2.62477e-18	23.0987	8.00208	22.358	23.8395	7.59646	8.40771
Esrp1	7995.03	-1.37545	4.79796e-39	2.7874e-37	241.246	83.5847	236.413	246.079	79.7474	87.422
Unc93b1	81.2897	-1.37541	0.00477469	0.0146129	4.24555	1.47505	4.91689	3.57421	1.16393	1.78617
Mnd1	444.781	-1.3751	1.50173e-10	1.39899e-09	60.0605	20.8067	60.6725	59.4485	20.3835	21.23
Mast1	183.785	-1.37456	2.52616e-05	0.000119374	4.29298	1.49168	4.34416	4.2418	1.26526	1.71809
Carm1	167.649	-1.37388	3.17694e-05	0.000147586	5.36705	1.86051	5.24327	5.49082	1.8562	1.86482
Lmbr1l	1250.86	-1.37283	3.65207e-11	3.62417e-10	57.2883	19.9418	56.4829	58.0936	14.6269	25.2566
Col1a1	1186.56	-1.37223	1.04066e-14	1.4055e-13	23.9318	8.32225	21.0348	26.8289	7.50011	9.14439
Calcoco1	3166.55	-1.3715	1.55705e-22	3.75023e-21	134.116	46.6343	120.345	147.887	43.1954	50.0732
Sh3yl1	770.607	-1.36894	1.911e-13	2.32926e-12	42.1774	14.7009	41.8035	42.5514	12.8834	16.5184
Mark1	120.284	-1.36709	0.000611652	0.00227373	2.89248	1.00477	2.63872	3.14624	1.15053	0.859007
Neil3	321.53	-1.36701	1.01175e-07	6.71271e-07	16.2878	5.68223	14.7505	17.825	5.30359	6.06087
LOC115485607	217.568	-1.36657	1.47643e-05	7.2557e-05	17.7794	6.17104	17.5239	18.0349	7.39948	4.94261
Hvcn1	198.858	-1.36436	9.49542e-06	4.80528e-05	6.28724	2.19745	6.14506	6.42943	2.01872	2.37618
Spry2	212.893	-1.36391	4.93022e-05	0.00022278	6.74979	2.36789	6.83003	6.66956	1.68088	3.0549
Plekho2	638.137	-1.36241	1.8462e-07	1.18841e-06	13.1488	4.61604	10.7335	15.5641	3.35982	5.87226
Ptpn6	118.639	-1.36237	0.00115657	0.00404988	5.40664	1.87996	6.34463	4.46865	2.26597	1.49395
P2rx6	75.3797	-1.36173	0.00550901	0.0166309	3.80665	1.32599	3.79974	3.81355	1.54702	1.10495
Map4k1	568.616	-1.36015	1.67794e-11	1.72356e-10	19.3828	6.79444	19.7614	19.0042	6.09778	7.4911
Leng8	1023.63	-1.36007	9.23163e-12	9.74229e-11	23.13	8.12126	21.2048	25.0551	6.48611	9.75642
Cd9	7722.92	-1.35983	3.14184e-35	1.51345e-33	770.706	269.566	804.775	736.638	281.378	257.754
Fan1	64.1036	-1.35969	0.0134056	0.0365093	1.32006	0.464096	1.55069	1.08943	0.341979	0.586213
Rab3ip	2299.4	-1.3596	4.37392e-23	1.09809e-21	60.5112	21.2143	57.9888	63.0335	19.3074	23.1213
Ttc25	321.396	-1.35911	3.43114e-08	2.43957e-07	10.5465	3.69402	10.7573	10.3356	3.62675	3.76129
Poll	529.327	-1.35888	9.88566e-11	9.32584e-10	23.5882	8.27919	22.711	24.4655	7.37808	9.18031
Dlg4	495.162	-1.35873	1.53276e-10	1.42446e-09	7.74612	2.71412	7.1605	8.33174	2.71991	2.70832
Entpd7	200.88	-1.35771	0.000870444	0.00313447	3.95465	1.39689	2.97322	4.93607	0.819619	1.97417
Supt6	4724.9	-1.3577	2.82878e-32	1.18491e-30	83.7909	29.3898	79.6045	87.9773	28.5923	30.1873
Rabepk	1289.95	-1.35762	1.57279e-18	2.85897e-17	44.2518	15.5355	44.3302	44.1734	14.0559	17.0151
Zfp952	456.606	-1.35753	5.41126e-09	4.24997e-08	13.8441	4.84276	12.9953	14.6929	5.52247	4.16305
Zfp667	1856.16	-1.35657	6.31676e-21	1.36246e-19	42.5582	14.908	44.0742	41.0422	16.204	13.612
F2	158.295	-1.35602	0.000104825	0.000447189	7.57581	2.66329	8.36532	6.78629	2.35531	2.97127
Phactr2	289.714	-1.35593	5.83327e-07	3.51883e-06	3.28317	1.15509	3.47286	3.09348	0.985385	1.3248
Abcd1	192.905	-1.35422	2.25034e-05	0.000107239	6.30453	2.21513	5.57759	7.03147	2.27943	2.15083
Atxn2l	2825.83	-1.35235	4.87708e-17	7.90244e-16	36.4051	12.8354	30.965	41.8453	11.5005	14.1702
Pigf	445.772	-1.35229	2.05202e-09	1.6873e-08	54.2234	19.0658	49.5738	58.873	20.1617	17.9698
Slc2a1	1293.87	-1.35206	3.65714e-19	7.01745e-18	57.5028	20.2517	54.48	60.5256	19.5697	20.9337
Zap70	265.083	-1.3519	2.09652e-06	1.17148e-05	10.5777	3.73541	10.1719	10.9836	3.09136	4.37946
Ubl4a	536.337	-1.34881	1.9796e-11	2.02174e-10	27.5923	9.72908	29.0176	26.1671	9.71292	9.74524
Nat14	156.073	-1.34862	9.844e-05	0.000422131	8.82741	3.10705	9.19767	8.45716	3.40182	2.81227
Rhot2	1624.91	-1.34768	1.19395e-14	1.60504e-13	67.46	23.8711	58.8844	76.0356	20.6485	27.0937
Ift172	1854.63	-1.34666	1.13268e-17	1.92571e-16	38.1057	13.4438	35.5632	40.6481	15.0048	11.8828
Tubb5	15713	-1.34645	9.61189e-25	2.64894e-23	235.555	83.3587	215.965	255.146	72.906	93.8114
Siae	1223.64	-1.34558	4.71952e-17	7.65788e-16	42.8541	15.1477	39.3223	46.386	15.5987	14.6968
Abhd14a	519.859	-1.34526	8.39393e-09	6.43943e-08	18.7266	6.64256	19.4954	17.9578	5.23972	8.04539
Ppp1r27	74.152	-1.34517	0.0136551	0.0370884	11.3816	4.05677	11.7954	10.9679	2.26402	5.84953
Fcho1	639.614	-1.34443	1.06426e-11	1.11247e-10	19.9582	7.07617	19.4837	20.4327	6.22062	7.93173
Dynlt1b	728.44	-1.34433	3.88673e-13	4.63003e-12	24.6887	8.73939	26.6437	22.7337	8.24966	9.22912
Mbd5	610.957	-1.34417	4.114e-11	4.04782e-10	7.1386	2.53188	7.14342	7.13378	2.17943	2.88433
Ak9	719.441	-1.3439	9.85362e-13	1.13747e-11	12.6109	4.45802	11.963	13.2589	4.80799	4.10805
Gm5913	94.1701	-1.34347	0.00211028	0.00699153	8.03107	2.83768	7.7101	8.35205	3.11489	2.56046
Marveld2	3263.34	-1.34194	8.39509e-25	2.31913e-23	114.768	40.7188	105.961	123.576	38.4145	43.0231
Ptpru	315.913	-1.34156	2.51992e-07	1.59501e-06	6.37463	2.25946	5.66605	7.0832	2.32979	2.18912
Gm9222	169.733	-1.33917	5.68845e-05	0.000254949	1.54594	0.548856	1.6928	1.39908	0.537196	0.560517
Mast4	583.345	-1.3382	9.96296e-11	9.39492e-10	5.07095	1.79893	4.78576	5.35613	1.98541	1.61245
Zfp219	749.245	-1.3381	8.00554e-09	6.15373e-08	10.5571	3.7668	9.73099	11.3833	2.77755	4.75605
Ripor1	920.991	-1.3376	1.02766e-09	8.75842e-09	7.84497	2.79871	6.61492	9.07502	2.22702	3.37041
Tph1	121.375	-1.33707	0.000521479	0.00196091	3.01368	1.07159	3.23204	2.79532	1.05114	1.09203
Zfp395	328.12	-1.33664	5.39873e-08	3.71185e-07	9.22165	3.28045	8.83818	9.60512	3.28313	3.27777
Septin11	1705.94	-1.33616	4.38301e-19	8.35482e-18	14.2237	5.05361	15.3541	13.0934	5.40137	4.70585
Tex2	2121.67	-1.33577	8.47247e-23	2.07742e-21	45.8764	16.3132	45.0347	46.718	17.4169	15.2094
Gm4815	304.919	-1.33508	3.29722e-07	2.05883e-06	36.5539	13.0477	36.749	36.3587	11.3161	14.7793
Kif3b	841.069	-1.33489	1.99142e-15	2.85998e-14	16.6182	5.92008	16.4383	16.7981	5.80973	6.03044
[truncated: 47,999 more rows]
