# Supplementary material for: The SMARCA5–DMRT1 Pioneer Complex Establishes Epigenetic Priming to Direct Male Germline Development
Source: Research Square preprint supplement (doi:10.21203/rs.3.rs-7576931/v1), 2025-10-08
Supplement: Supplementary file 3 [file 71d4c3bdffe8603f342f2090.xlsx]

## Sheet: P1 ProSG ATAC
Supplementary Table 3: ATAC-seq peaks in eash sample, listed in sepaeate tabs.
Chr	Start	End	Annotation	Detailed Annotation	Distance to TSS	Nearest PromoterID	Entrez ID	Nearest Unigene	Nearest Refseq	Nearest Ensembl	Gene Name	Gene Alias	Gene Description	Gene Type
chr1	24611512	24616200	Intergenic	Intergenic	-26419	NM_007733	12823	Mm.329196	NM_007733	ENSMUSG00000026141	Col19a1	-	collagen, type XIX, alpha 1	protein-coding
chr2	22587288	22590543	Intergenic	Intergenic	-33412	NM_008078	14417	Mm.4784	NM_008078	ENSMUSG00000026787	Gad2	6330404F12Rik|GAD(65)|GAD65|Gad-2	glutamic acid decarboxylase 2	protein-coding
chr4	80002330	80005212	Intergenic	Intergenic	-830442	NM_001282015	22178	Mm.30438	NM_031202	ENSMUSG00000005994	Tyrp1	Oca3|TRP-1|TRP1|Tyrp|b|brown|isa	tyrosinase-related protein 1	protein-coding
chr13	85126556	85127528	Intergenic	Intergenic	-62343	NM_001347588	66671	Mm.18474	NM_023243	ENSMUSG00000021548	Ccnh	6330408H09Rik|AI661354|AV102684|AW538719	cyclin H	protein-coding
chr2	98666234	98667334	Intergenic	GSAT_MM|Satellite|Satellite	1199127	NM_178725	241568	Mm.241682	NM_178725	ENSMUSG00000050587	Lrrc4c	6430556C10Rik|NGL-1	leucine rich repeat containing 4C	protein-coding
chr12	97061402	97061815	Intergenic	Intergenic	-1014386	NR_103800	69423	Mm.46121	NM_027076		1700019M22Rik	-	NFX-like protein	pseudo
chr10	96077508	96077897	Intergenic	Intergenic	137039	NM_001001932	216238	Mm.210035	NM_001001932	ENSMUSG00000036499	Eea1	A430109M19Rik|B230358H09Rik|ZFYVE2	early endosome antigen 1	protein-coding
chr9	2999993	3038318	Intergenic	GSAT_MM|Satellite|Satellite	19588	NR_039546	100628572		NR_039546	ENSMUSG00000106183	Mir101c	mir-101c|mmu-mir-101c	microRNA 101c	ncRNA
chr6	79818030	79818360	5' UTR (NM_001190732, exon 1 of 1)	5' UTR (NM_001190732, exon 1 of 1)	164	NM_001190732	100463512	Mm.461086	NM_001190732	ENSMUSG00000096887	Gm20594	Mtrnr2l	predicted gene, 20594	protein-coding
chr6	9889877	9890211	Intergenic	Intergenic	940025	NM_008751	18231	Mm.46954	NM_008751	ENSMUSG00000046178	Nxph1	C130005L03Rik	neurexophilin 1	protein-coding
chr5	7276728	7277291	intron (NM_001163223, intron 1 of 3)	intron (NM_001163223, intron 1 of 3)	-27155	NM_027603	70920	Mm.158494	NM_027603	ENSMUSG00000040514	Tex47	4921511H03Rik	testis expressed 47	protein-coding
chr14	19415702	19419638	Intergenic	GSAT_MM|Satellite|Satellite	184917	NM_001024706	432825	Mm.327147	NM_001024706	ENSMUSG00000095024	Gm5458	EG432825	predicted gene 5458	protein-coding
chr5	60042718	60043094	Intergenic	Intergenic	-56904	NR_040682	71057	Mm.50817	NR_040682	ENSMUSG00000106013	4933402J10Rik	-	RIKEN cDNA 4933402J10 gene	ncRNA
chr14	124801553	124802246	Intergenic	(TTAGGG)n|Simple_repeat|Simple_repeat	-124772	NM_207667	14169	Mm.206362	NM_010201	ENSMUSG00000025551	Fgf14	FHF-4|Fhf4|Tg(tetO-MAPT*P301L)4510Kha|mFHF-4(1B)	fibroblast growth factor 14	protein-coding
chr18	65119752	65120008	intron (NM_031881, intron 4 of 29)	intron (NM_031881, intron 4 of 29)	96353	NM_031881	83814	Mm.98668	NM_031881	ENSMUSG00000024589	Nedd4l	1300012C07Rik|Nedd4-2|Nedd4b	neural precursor cell expressed, developmentally down-regulated gene 4-like	protein-coding
chr7	145340929	145341458	Intergenic	(TTAGGG)n|Simple_repeat|Simple_repeat	26358	NM_203490	211578	Mm.370299	NM_203490	ENSMUSG00000051207	Mrgprd	Gm499|Mgrd|MrgD|TGR7	MAS-related GPR, member D	protein-coding
chr12	3109865	3110121	Intergenic	GSAT_MM|Satellite|Satellite	-125798	NR_015551	74173	Mm.309774	NM_028796	ENSMUSG00000079179	Rab10os	1700012B15Rik|1810036A22Rik	RAB10, member RAS oncogene family, opposite strand	ncRNA
chr9	35305216	35305592	Intergenic	GSAT_MM|Satellite|Satellite	24299	NR_040715	71133	Mm.158577	NR_040715	ENSMUSG00000111746	4933422A05Rik	-	RIKEN cDNA 4933422A05 gene	ncRNA
chr2	98662229	98664081	Intergenic	L1_Mur2|LINE|L1	1195498	NM_178725	241568	Mm.241682	NM_178725	ENSMUSG00000050587	Lrrc4c	6430556C10Rik|NGL-1	leucine rich repeat containing 4C	protein-coding
chr18	90602133	90602637	Intergenic	(TTAGGG)n|Simple_repeat|Simple_repeat	22560	NM_001362365	108168395	Mm.391131	NM_001362365	ENSMUSG00000110277	Gm45871	-	predicted gene 45871	protein-coding
chr18	3638871	3639155	Intergenic	L1_Mus1|LINE|L1	131056	NM_026505	68010	Mm.284863	NM_026505	ENSMUSG00000024232	Bambi	2610003H06Rik	BMP and activin membrane-bound inhibitor	protein-coding
chr12	120028628	120029021	Intergenic	(TTAGGG)n|Simple_repeat|Simple_repeat	82862	NM_001294154	217951	Mm.387395	NM_001160385	ENSMUSG00000048004	Tmem196	Gm528	transmembrane protein 196	protein-coding
chr2	98664890	98665228	Intergenic	SYNREP_MM|Satellite|Satellite	1197402	NM_178725	241568	Mm.241682	NM_178725	ENSMUSG00000050587	Lrrc4c	6430556C10Rik|NGL-1	leucine rich repeat containing 4C	protein-coding
chr12	59262887	59263118	Intergenic	Intergenic	-43519	NM_001033156	70611	Mm.311026	NM_001033156	ENSMUSG00000035329	Fbxo33	5730501N20Rik|AI642135	F-box protein 33	protein-coding
chr6	103649045	103649302	intron (NM_007697, intron 4 of 26)	SYNREP_MM|Satellite|Satellite	138297	NM_007697	12661	Mm.251288	NM_007697	ENSMUSG00000030077	Chl1	A530023M13Rik|AI465420|CALL|LICAM2	cell adhesion molecule L1-like	protein-coding
chr10	85025937	85026629	Intergenic	Intergenic	76212	NM_010214	14202	Mm.46163	NM_010214	ENSMUSG00000050035	Fhl4	-	four and a half LIM domains 4	protein-coding
chr2	182012663	182013226	Intergenic	(TTAGGG)n|Simple_repeat|Simple_repeat	21718	NM_001205282	672125	Mm.489571	NM_001205282	ENSMUSG00000098505	Gm14496	-	predicted gene 14496	protein-coding
chr1	132790894	132791366	Intergenic	Intergenic	-49333	NM_182716	269116	Mm.326702	NM_182716	ENSMUSG00000026442	Nfasc	AA387016|D430023G06Rik|NF|mKIAA0756	neurofascin	protein-coding
chr3	159939405	159939677	TTS (NM_001356350)	TTS (NM_001356350)	99891	NM_001356349	68151	Mm.6766	NM_026582	ENSMUSG00000028173	Wls	5031439A09Rik|AI173978|AI987742|EVI|Gpr177	wntless WNT ligand secretion mediator	protein-coding
chr19	61331275	61331564	Intergenic	(TTAGGG)n|Simple_repeat|Simple_repeat	-103001	NM_009970	12982	Mm.287228	NM_009970	ENSMUSG00000059326	Csf2ra	CD116|Csfgmra|GM-CSF-Ra|GM-CSFR	colony stimulating factor 2 receptor, alpha, low-affinity (granulocyte-macrophage)	protein-coding
chr16	98107441	98107778	Intergenic	(TTAGGG)n|Simple_repeat|Simple_repeat	-25170	NR_015491	320586	Mm.442230	NR_015491	ENSMUSG00000116673	A630089N07Rik	-	RIKEN cDNA A630089N07 gene	ncRNA
chr1	195371652	195371966	Intergenic	(TTAGGG)n|Simple_repeat|Simple_repeat	-195090	NM_007758	12902	Mm.235387	NM_007758	ENSMUSG00000026616	Cr2	C3DR|CD21|CD35|Cr-1|Cr-2|Cr1	complement receptor 2	protein-coding
chr17	13550662	13553201	intron (NR_045436, intron 1 of 4)	(CTGTG)n|Simple_repeat|Simple_repeat	2163	NR_045437	72578	Mm.46549	NR_045436	ENSMUSG00000117042	2700054A10Rik	-	RIKEN cDNA 2700054A10 gene	ncRNA
chrX	170758175	170758516	Intergenic	(TTAGGG)n|Simple_repeat|Simple_repeat	85701	NM_001308488	107626	Mm.486144	NM_001199212	ENSMUSG00000093806	Asmt	Hiomt	acetylserotonin O-methyltransferase	protein-coding
chr17	39842991	39848836	non-coding (NR_046233, exon 1 of 1)	non-coding (NR_046233, exon 1 of 1)	2916	NR_046233	100861531		NR_046233		Rn45s	-	45S pre-ribosomal RNA	rRNA
chr13	120321393	120321634	Intergenic	(TTAGGG)n|Simple_repeat|Simple_repeat	4651	NM_153523	236219	Mm.302175	NM_153523	ENSMUSG00000095821	Tcstv3	-	2-cell-stage, variable group, member 3	protein-coding
chr13	74528467	74530903	Intergenic	(CACAG)n|Simple_repeat|Simple_repeat	-35735	NM_146231	235956		NM_146231	ENSMUSG00000069208	Zfp825	-	zinc finger protein 825	protein-coding
chr11	90538814	90539133	intron (NM_011505, intron 14 of 17)	intron (NM_011505, intron 14 of 17)	99135	NM_011505	20913	Mm.207203	NM_011505	ENSMUSG00000020546	Stxbp4	6030470M02Rik|Synip	syntaxin binding protein 4	protein-coding
chrX	170880928	170881297	Intergenic	(TTAGGG)n|Simple_repeat|Simple_repeat	208468	NM_001308488	107626	Mm.486144	NM_001199212	ENSMUSG00000093806	Asmt	Hiomt	acetylserotonin O-methyltransferase	protein-coding
chr11	3178739	3199960	intron (NM_001363224, intron 3 of 28)	intron (NM_001363224, intron 3 of 28)	4254	NM_030207	78887	Mm.394071	NM_030207	ENSMUSG00000023764	Sfi1	-	Sfi1 homolog, spindle assembly associated (yeast)	protein-coding
chr6	145337421	145338213	Intergenic	ORR1E|LTR|ERVL-MaLR	-49808	NR_003625	381827	Mm.179075	NM_001001987		1700073E17Rik	-	ribosomal protein L7 pseudogene	pseudo
chr13	119596257	119603455	intron (NM_001370626, intron 2 of 2)	intron (NM_001370626, intron 2 of 2)	-23963	NM_020279	56838	Mm.143745	NM_020279	ENSMUSG00000074715	Ccl28	CCK1|MEC|Scya28	chemokine (C-C motif) ligand 28	protein-coding
chr11	109011641	109012122	Intergenic	LSU-rRNA_Hsa|rRNA|rRNA	91532	NM_015732	12006	Mm.71710	NM_015732	ENSMUSG00000000142	Axin2	Axi1|Axil|Conductin	axin 2	protein-coding
chr16	57391133	57391699	intron (NM_001040397, intron 1 of 4)	LSU-rRNA_Hsa|rRNA|rRNA	38139	NM_001040397	78749	Mm.328360	NM_001040397	ENSMUSG00000043336	Filip1l	4631422O05Rik|Doc1	filamin A interacting protein 1-like	protein-coding
chr8	83756765	83756980	Intergenic	(CCCTAA)n|Simple_repeat|Simple_repeat	-15561	NM_011925	26364	Mm.334648	NM_011925	ENSMUSG00000002885	Adgre5	AA409984|Cd97|TM7LN1	adhesion G protein-coupled receptor E5	protein-coding
chr16	11143893	11144333	intron (NR_027502, intron 19 of 22)	LSU-rRNA_Hsa|rRNA|rRNA	-9581	NM_029582	106200	Mm.291015	NM_029582	ENSMUSG00000022498	Txndc11	2810408E11Rik|AI427833|EFP1|Txdc11	thioredoxin domain containing 11	protein-coding
chr13	13860609	13861005	Intergenic	(TTAGGG)n|Simple_repeat|Simple_repeat	76500	NM_010317	14706	Mm.215394	NM_010317	ENSMUSG00000021303	Gng4	-	guanine nucleotide binding protein (G protein), gamma 4	protein-coding
chr10	130594385	130595001	Intergenic	(TTAGGG)n|Simple_repeat|Simple_repeat	-97314	NM_001103366	625131	Mm.469844	NM_001103366	ENSMUSG00000091511	Vmn2r87	EG625131	vomeronasal 2, receptor 87	protein-coding
chr2	165510922	165511767	intron (NM_130451, intron 1 of 4)	intron (NM_130451, intron 1 of 4)	7447	NM_130451	170441	Mm.34147	NM_130451	ENSMUSG00000027661	Slc2a10	AA450473|Glut10	solute carrier family 2 (facilitated glucose transporter), member 10	protein-coding
chr9	123461786	123462196	3' UTR (NM_001348168, exon 22 of 22)	3' UTR (NM_001348168, exon 22 of 22)	-16710	NM_013860	29806	Mm.10987	NM_013860	ENSMUSG00000025239	Limd1	AW822033|D9Ertd192e	LIM domains containing 1	protein-coding
chr3	5860328	5860827	Intergenic	LSU-rRNA_Hsa|rRNA|rRNA	-284329	NM_001267715	19302	Mm.132336	NM_008994	ENSMUSG00000040374	Pex2	D3Ertd138e|PAF-1|PMP35|Pxmp3	peroxisomal biogenesis factor 2	protein-coding
chr11	3122544	3126316	intron (NR_003517, intron 1 of 6)	intron (NR_003517, intron 1 of 6)	428	NR_003517	236604	Mm.247625	NM_001004146		Pisd-ps1	-	phosphatidylserine decarboxylase, pseudogene 1	pseudo
chr2	57629493	57629721	Intergenic	(TTAGGG)n|Simple_repeat|Simple_repeat	-368548	NM_172855	241391	Mm.484118	NM_172855	ENSMUSG00000026828	Galnt5	4832424J23	polypeptide N-acetylgalactosaminyltransferase 5	protein-coding
chr5	146260986	146261363	intron (NM_153599, intron 2 of 12)	LSU-rRNA_Hsa|rRNA|rRNA	29924	NM_153599	264064	Mm.260576	NM_153599	ENSMUSG00000029635	Cdk8	-	cyclin-dependent kinase 8	protein-coding
chr7	15998199	15999354	intron (NM_001081418, intron 1 of 13)	ZP3AR|Satellite|Satellite	719	NM_001081418	243842	Mm.440249	NM_001081418	ENSMUSG00000070808	Bicra	Gltscr1	BRD4 interacting chromatin remodeling complex associated protein	protein-coding
chr6	47752218	47754448	promoter-TSS (NR_002841).3	promoter-TSS (NR_002841).3	-408	NR_002841	19799		NR_002841		Rn4.5s	-	4.5S RNA	rRNA
chrY	90738754	90744825	Intergenic	CpG	13261	NR_137283	654820	Mm.34441	NM_001039559	ENSMUSG00000072844	G530011O06Rik	-	RIKEN cDNA G530011O06 gene	ncRNA
chr6	47743593	47745819	promoter-TSS (NR_002841).2	promoter-TSS (NR_002841).2	-475	NR_002841	19799		NR_002841		Rn4.5s	-	4.5S RNA	rRNA
chr10	69910555	69910894	intron (NM_170689, intron 23 of 41)	intron (NM_170689, intron 23 of 41)	-14808	NM_170687	11735	Mm.235960	NM_009670	ENSMUSG00000069601	Ank3	2900054D09Rik|AI314020|Ank-3|AnkG|Ankyrin-3|Ankyrin-G	ankyrin 3, epithelial	protein-coding
chr6	47760102	47765095	Intergenic	Intergenic	-9673	NR_002841	19799		NR_002841		Rn4.5s	-	4.5S RNA	rRNA
chr6	3182499	3183975	Intergenic	Intergenic	-105282	NR_036696	667335	Mm.380219	NR_036696	ENSMUSG00000106779	Gm8579	EG667335	spermatogenesis associated glutamate (E)-rich protein 4a pseudogene	pseudo
chr11	3130732	3148708	intron (NM_001363224, intron 18 of 28)	intron (NM_001363224, intron 18 of 28)	15718	NR_003517	236604	Mm.247625	NM_001004146		Pisd-ps1	-	phosphatidylserine decarboxylase, pseudogene 1	pseudo
chr12	93576982	93577245	Intergenic	(TTAGGG)n|Simple_repeat|Simple_repeat	-132290	NR_126436	75295	Mm.243878	NR_126436	ENSMUSG00000113164	4930559C10Rik	-	RIKEN cDNA 4930559C10 gene	ncRNA
chr3	6049192	6050158	Intergenic	Intergenic	-473427	NM_001267715	19302	Mm.132336	NM_008994	ENSMUSG00000040374	Pex2	D3Ertd138e|PAF-1|PMP35|Pxmp3	peroxisomal biogenesis factor 2	protein-coding
chr17	70963645	70963897	Intergenic	LSU-rRNA_Hsa|rRNA|rRNA	26745	NM_023402	67938	Mm.261329	NM_023402	ENSMUSG00000034868	Myl12b	1500001M02Rik|C77744|Mylc2b|RLC-B	myosin, light chain 12B, regulatory	protein-coding
chr3	149052480	149052929	Intergenic	(TTAGGG)n|Simple_repeat|Simple_repeat	-98069	NM_001081298	99633	Mm.9776	NM_001081298	ENSMUSG00000028184	Adgrl2	AI450192|CIRL-2|Gm619|Lec1|Lphh1|Lphn2|mKIAA0786	adhesion G protein-coupled receptor L2	protein-coding
chr6	47747935	47749904	Intergenic	CpG	4006	NR_002841	19799		NR_002841		Rn4.5s	-	4.5S RNA	rRNA
chrX	126016230	126016748	Intergenic	Intergenic	817515	NM_177705	237029	Mm.60998	NM_177705	ENSMUSG00000058670	4932411N23Rik	-	RIKEN cDNA 4932411N23 gene	protein-coding
chr7	30475830	30476606	intron (NM_019459, intron 22 of 29)	ZP3AR|Satellite|Satellite	-10627	NR_004443	445267	Mm.398140	NR_004443	ENSMUSG00000087009	Nphs1os	Nphs1as	nephrosis 1 homolog, nephrin, opposite strand	ncRNA
chr15	75085508	75087033	Intergenic	B1_Mm|SINE|Alu	25667	NM_001357693	100041546	Mm.482110	NM_001099217	ENSMUSG00000022584	Ly6c2	Ly-6C.2|Ly-6C2	lymphocyte antigen 6 complex, locus C2	protein-coding
chrX	117087220	117089875	Intergenic	L1Md_F|LINE|L1	73790	NM_001102665	100039319	Mm.469831	NM_001102665	ENSMUSG00000067441	H2afb1	Gm14920|Gm1539|H2A.B.3|H2A.Bbd1|H2A.Lap1	H2A histone family member B1	protein-coding
chr6	29747695	29748961	intron (NM_176996, intron 1 of 11)	(CTGTG)n|Simple_repeat|Simple_repeat	12831	NM_176996	319757	Mm.29279	NM_176996	ENSMUSG00000001761	Smo	E130215L21Rik|Smoh|bnb|smoothened	smoothened, frizzled class receptor	protein-coding
chr6	47739198	47740965	Intergenic	CpG	4150	NR_002841	19799		NR_002841		Rn4.5s	-	4.5S RNA	rRNA
chr8	19784148	19785295	intron (NM_001270553, intron 6 of 9).2	CpG	55145	NM_001270553	100861668	Mm.491087	NM_001270553	ENSMUSG00000095294	Gm21119	-	predicted gene, 21119	protein-coding
chrX	170008531	170010336	Intergenic	(CCCCG)n|Simple_repeat|Simple_repeat	-30516	NR_029457	654820	Mm.34441	NM_001039559	ENSMUSG00000072844	G530011O06Rik	-	RIKEN cDNA G530011O06 gene	ncRNA
chr6	125415922	125417848	Intergenic	(CCTG)n|Simple_repeat|Simple_repeat	-36381	NM_198604	213522	Mm.333396	NM_198604	ENSMUSG00000038167	Plekhg6	BC026778|Gm155	pleckstrin homology domain containing, family G (with RhoGef domain) member 6	protein-coding
chr7	44304466	44305881	intron (NM_009131, intron 3 of 3)	intron (NM_009131, intron 3 of 3)	1786	NM_009131	20256	Mm.20428	NM_009131	ENSMUSG00000004473	Clec11a	AW457320|Clecsf3|Scgf	C-type lectin domain family 11, member a	protein-coding
chrX	66493581	66495885	Intergenic	L1Md_F|LINE|L1	-154585	NM_001161431	245450	Mm.336081	NM_198863	ENSMUSG00000036790	Slitrk2	A930040J07	SLIT and NTRK-like family, member 2	protein-coding
chr13	93096610	93097211	non-coding (NR_046182, exon 4 of 4)	non-coding (NR_046182, exon 4 of 4)	2077	NR_046182	408254	Mm.474857	NR_046182	ENSMUSG00000114968	A630019I02Rik	-	RIKEN cDNA A630019I02 gene	ncRNA
chr7	6727853	6730622	intron (NM_008817, intron 1 of 8)	intron (NM_008817, intron 1 of 8)	1182	NM_008817	18616	Mm.389800	NM_008817	ENSMUSG00000002265	Peg3	AL022617|ASF-1|End4|Gcap4|Pw1|Zfp102|mKIAA0287	paternally expressed 3	protein-coding
chr2	33130205	33131754	promoter-TSS (NM_001355200)	promoter-TSS (NM_001355200)	-360	NM_001355200	99326	Mm.41290	NM_178888	ENSMUSG00000038860	Garnl3	AW120551	GTPase activating RANGAP domain-like 3	protein-coding
chr5	117125653	117126360	intron (NM_001199685, intron 1 of 20)	intron (NM_001199685, intron 1 of 20)	5877	NM_001199685	330177	Mm.24343	NM_183306	ENSMUSG00000061288	Taok3	2900006A08Rik|A130052D22|A430105I05Rik	TAO kinase 3	protein-coding
chr2	25982779	25983914	promoter-TSS (NM_001276360)	promoter-TSS (NM_001276360)	-64	NM_001276361	227634	Mm.36834	NM_001115076	ENSMUSG00000026933	Camsap1	9530003A05Rik|C77823|PRO2405	calmodulin regulated spectrin-associated protein 1	protein-coding
chr6	56246691	56248671	intron (NM_001159956, intron 1 of 16)	L1Md_F|LINE|L1	114711	NM_001159953	18575	Mm.5145	NM_011054	ENSMUSG00000004347	Pde1c	-	phosphodiesterase 1C	protein-coding
chr2	5379040	5379378	promoter-TSS (NR_030601)	promoter-TSS (NR_030601)	-181	NR_030601	100124465		NR_030601	ENSMUSG00000078031	Mir466d	Mirn466d	microRNA 466d	ncRNA
chr12	78350873	78351171	intron (NM_145965, intron 2 of 22)	LSU-rRNA_Hsa|rRNA|rRNA	124367	NM_145965	268566	Mm.341742	NM_145965	ENSMUSG00000047454	Gphn	5730552E08Rik|AI662856|BC027112|C230040D23|GPH|GPHRYN|geph	gephyrin	protein-coding
chr16	17222228	17222509	Intergenic	LSU-rRNA_Hsa|rRNA|rRNA	-11219	NM_178922	58180	Mm.261602	NM_178922	ENSMUSG00000050240	Hic2	AA409108|HRG22|mKIAA1020	hypermethylated in cancer 2	protein-coding
chr8	125332165	125333161	Intergenic	Intergenic	160170	NM_001081337	244668	Mm.271668	NM_001081337	ENSMUSG00000001995	Sipa1l2	BC058408|mKIAA1389	signal-induced proliferation-associated 1 like 2	protein-coding
chrY	90783347	90785252	Intergenic	(CCCCG)n|Simple_repeat|Simple_repeat	-1143	NM_133362	170942	Mm.76062	NM_133362	ENSMUSG00000096768	Erdr1	edr	erythroid differentiation regulator 1	protein-coding
chrX	170010676	170018004	Intergenic	Intergenic	-35423	NR_029457	654820	Mm.34441	NM_001039559	ENSMUSG00000072844	G530011O06Rik	-	RIKEN cDNA G530011O06 gene	ncRNA
chr10	6514553	6515324	Intergenic	Intergenic	-243655	NM_001302794	18390	Mm.438000	NM_011013	ENSMUSG00000000766	Oprm1	M-OR-1|MOP-R|MOR-1|MOR-1O|Oprm|mor|muOR	opioid receptor, mu 1	protein-coding
chr4	146474097	146476362	Intergenic	CpG	26199	NM_001085522	433791	Mm.276881	NM_001085522	ENSMUSG00000070605	Zfp992	Gm13251	zinc finger protein 992	protein-coding
chr7	6362311	6363370	promoter-TSS (NM_001112805)	promoter-TSS (NM_001112805)	-468	NM_001025163	330463	Mm.136456	NM_177888	ENSMUSG00000055150	Zfp78	A330079D15|KRAB12|Zfp77	zinc finger protein 78	protein-coding
chr1	195241528	195241892	Intergenic	CpG	-64991	NM_007758	12902	Mm.235387	NM_007758	ENSMUSG00000026616	Cr2	C3DR|CD21|CD35|Cr-1|Cr-2|Cr1	complement receptor 2	protein-coding
chrY	90785577	90792438	intron (NM_133362, intron 1 of 3)	intron (NM_133362, intron 1 of 3)	3565	NR_137282	170942	Mm.76062	NM_133362	ENSMUSG00000096768	Erdr1	edr	erythroid differentiation regulator 1	protein-coding
chr13	54693575	54694817	promoter-TSS (NR_027396)	promoter-TSS (NR_027396)	-236	NR_027395	105239	Mm.25366	NM_134064	ENSMUSG00000034928	Rnf44	AI854545|mKIAA1100	ring finger protein 44	protein-coding
chr4	9959111	9959334	Intergenic	tRNA-Gln-CAA_|tRNA|tRNA	-41825	NR_004448	74662	Mm.483401	NR_004448	ENSMUSG00000082843	4930448K20Rik	1700009K09Rik	glyceraldehyde-3-phosphate dehydrogenase pseudogene	pseudo
chr13	44869566	44870047	intron (NM_021878, intron 4 of 18)	LSU-rRNA_Hsa|rRNA|rRNA	132290	NM_025772	94245	Mm.352311	NM_025772	ENSMUSG00000057531	Dtnbp1	5430437B18Rik|AW048963|Bloc1s8|dysbindin|sdy	dystrobrevin binding protein 1	protein-coding
chr8	20121854	20122990	Intergenic	CpG	175010	NR_030708	547150	Mm.359054	NR_030708	ENSMUSG00000071796	6820431F20Rik	-	cadherin 11 pseudogene	pseudo
chrY	90824795	90829190	Intergenic	CpG	12414	NR_137283	654820	Mm.34441	NM_001039559	ENSMUSG00000072844	G530011O06Rik	-	RIKEN cDNA G530011O06 gene	ncRNA
chr14	69161998	69162441	Intergenic	(CCCTAA)n|Simple_repeat|Simple_repeat	-9583	NM_010920	18092	Mm.390691	NM_010920	ENSMUSG00000044186	Nkx2-6	AV044928|Nkx-2.6|Nkx2.6|Tix|tinman	NK2 homeobox 6	protein-coding
chr17	13305957	13306256	Intergenic	(CTGTG)n|Simple_repeat|Simple_repeat	-48466	NM_001167578	100041352	Mm.432087	NM_001167578	ENSMUSG00000052469	Tcp10c	D17Leh66C|D17Leh66ca|Gm9880|T66C-a|Tcp-10c	t-complex protein 10c	protein-coding
chr8	52303626	52308641	Intergenic	L1Md_T|LINE|L1	-50478	NR_151738	330767	Mm.246790	NR_151738	ENSMUSG00000110013	1190028D05Rik	-	RIKEN cDNA 1190028D05 gene	ncRNA
chr17	3081422	3084808	intron (NR_003519, intron 1 of 7)	intron (NR_003519, intron 1 of 7)	1068	NR_003519	328734	Mm.335641	NR_003519		Pisd-ps2	D030013I16Rik	phosphatidylserine decarboxylase, pseudogene 2	pseudo
chr13	95215709	95216228	intron (NM_001170669, intron 1 of 18)	intron (NM_001170669, intron 1 of 18)	7082	NM_001170669	218461	Mm.100167	NM_172263	ENSMUSG00000021684	Pde8b	B230331L10Rik|C030047E14Rik	phosphodiesterase 8B	protein-coding
chr19	53142128	53143159	promoter-TSS (NM_001277100)	promoter-TSS (NM_001277100)	-113	NM_001164100	27360	Mm.426080	NM_013758	ENSMUSG00000025026	Add3	AI463285|R75380	adducin 3 (gamma)	protein-coding
chr6	113306375	113307518	promoter-TSS (NM_001282128)	promoter-TSS (NM_001282128)	-191	NM_001282126	78783	Mm.356059	NM_030178	ENSMUSG00000001632	Brpf1	4833438B11Rik|4930540D11Rik|Brpf2	bromodomain and PHD finger containing, 1	protein-coding
chr10	5823523	5824709	promoter-TSS (NM_175374)	promoter-TSS (NM_175374)	-173	NM_175374	108853	Mm.55082	NM_175374	ENSMUSG00000019774	Mtrf1l	9130004K12Rik	mitochondrial translational release factor 1-like	protein-coding
chr6	4923788	4924193	intron (NM_001363809, intron 2 of 15)	(CCCTAA)n|Simple_repeat|Simple_repeat	20679	NM_181595	243725	Mm.332901	NM_181595	ENSMUSG00000032827	Ppp1r9a	2810430P21Rik|4930518N04Rik|5330407E15|A230094E16Rik|BB181831|NRB|neurabin-I	protein phosphatase 1, regulatory subunit 9A	protein-coding
chr17	56078714	56080101	promoter-TSS (NM_001331053)	promoter-TSS (NM_001331053)	-74	NM_024432	66530	Mm.28000	NM_024432	ENSMUSG00000019578	Ubxn6	1200008L11Rik|2210415J11Rik|AU040909|Ubxd1|Ubxdc2	UBX domain protein 6	protein-coding
chr6	88841652	88843015	promoter-TSS (NR_045880)	promoter-TSS (NR_045880)	-398	NM_001362152	80283	Mm.166858	NM_030251	ENSMUSG00000030083	Abtb1	AI847549|BC003234|BPOZ|EF1ABP	ankyrin repeat and BTB (POZ) domain containing 1	protein-coding
chr11	99824879	99826712	Intergenic	L1Md_Gf|LINE|L1	-10129	NM_001100614	670496	Mm.466614	NM_001100614	ENSMUSG00000078258	Gm11564	-	predicted gene 11564	protein-coding
chrX	169990957	169995571	Intergenic	Intergenic	-14347	NR_029457	654820	Mm.34441	NM_001039559	ENSMUSG00000072844	G530011O06Rik	-	RIKEN cDNA G530011O06 gene	ncRNA
chr9	104001923	104003210	promoter-TSS (NM_028721)	promoter-TSS (NM_028721)	22	NM_172460	74025	Mm.479273	NM_028721	ENSMUSG00000032558	Nphp3	3632410F03Rik|AI550417|C230078J01|D330020E01Rik|pcy	nephronophthisis 3 (adolescent)	protein-coding
chr17	25919467	25920563	promoter-TSS (NM_139154)	promoter-TSS (NM_139154)	-301	NM_139154	224624	Mm.328872	NM_139154	ENSMUSG00000025730	Rab40c	RAR3	Rab40C, member RAS oncogene family	protein-coding
chr12	55916783	55917343	Intergenic	(CACCT)n|Simple_repeat|Simple_repeat	80697	NM_001037756	52592	Mm.24761	NM_027867	ENSMUSG00000012076	Brms1l	0710008O11Rik|AI159718|BRMS1|D12Ertd407e	breast cancer metastasis-suppressor 1-like	protein-coding
chr8	120589014	120589551	promoter-TSS (NM_178856)	promoter-TSS (NM_178856)	-207	NM_178856	272551	Mm.275910	NM_178856	ENSMUSG00000031821	Gins2	2210013I18Rik|4833427B12Rik|AI323585|Pfs2	GINS complex subunit 2 (Psf2 homolog)	protein-coding
chr16	27423356	27425030	intron (NM_001025615, intron 5 of 9)	L1Md_F|LINE|L1	35237	NM_001289436	67501	Mm.258985	NM_026202	ENSMUSG00000038127	Ccdc50	C3orf6	coiled-coil domain containing 50	protein-coding
chr4	73294566	73296337	Intergenic	L1Md_F|LINE|L1	109621	NM_001013393	433719	Mm.348294	NM_001013393	ENSMUSG00000066137	Gm11487	-	predicted gene 11487	protein-coding
chr5	127875026	127876924	intron (NM_172885, intron 4 of 8)	L1Md_F|LINE|L1	243713	NM_177005	319804	Mm.237888	NM_177005	ENSMUSG00000049971	Glt1d1	5730455A04Rik	glycosyltransferase 1 domain containing 1	protein-coding
chr6	90033568	90035751	Intergenic	L1Md_T|LINE|L1	2182	NM_053218	113845	Mm.425336	NM_053218	ENSMUSG00000057592	Vmn1r48	V1ra3	vomeronasal 1 receptor 48	protein-coding
chr5	109549742	109559014	TTS (NM_016715)	TTS (NM_016715)	4615	NM_016715	57914	Mm.35771	NM_016715	ENSMUSG00000033467	Crlf2	CRLM2|Ly114|Tpte2|Tslpr	cytokine receptor-like factor 2	protein-coding
chr7	29063478	29064120	intron (NM_009109, intron 63 of 105)	ZP3AR|Satellite|Satellite	19895	NR_035489	100316710		NR_035489	ENSMUSG00000089219	Mir1963	mir-1963|mmu-mir-1963	microRNA 1963	ncRNA
chr14	42133539	42135195	Intergenic	Intergenic	-39090	NR_073362	73553	Mm.243777	NM_028570	ENSMUSG00000090462	1700091H14Rik	100041930|Gm3578	RIKEN cDNA 1700091H14 gene	ncRNA
chr4	118547199	118548724	Intergenic	G-rich|Low_complexity|Low_complexity	-4235	NM_172383	230678	Mm.23639	NM_172383	ENSMUSG00000050854	Tmem125	6330530A05Rik|AV223516	transmembrane protein 125	protein-coding
chr16	48398533	48399072	TTS (NR_015373)	TTS (NR_015373)	13614	NR_015373	433023	Mm.483302	NR_015373	ENSMUSG00000110573	Gm5485	EG433023	predicted gene 5485	ncRNA
chr7	36455201	36455685	Intergenic	ZP3AR|Satellite|Satellite	-242675	NM_172298	243931	Mm.44141	NM_172298	ENSMUSG00000021217	Tshz3	A630038G13Rik|Tsh3|Zfp537|mKIAA1474|teashirt3	teashirt zinc finger family member 3	protein-coding
chr12	69654058	69654333	intron (NM_001135559, intron 2 of 22)	intron (NM_001135559, intron 2 of 22)	27657	NM_001135559	20663	Mm.3770	NM_001135559	ENSMUSG00000034801	Sos2	SOS-2|mSOS-2	SOS Ras/Rho guanine nucleotide exchange factor 2	protein-coding
chr6	47758469	47759153	Intergenic	RMER12B|LTR|ERVK	-5886	NR_002841	19799		NR_002841		Rn4.5s	-	4.5S RNA	rRNA
chr4	16163030	16164370	promoter-TSS (NR_045765)	promoter-TSS (NR_045765)	-57	NM_138952	192656	Mm.112765	NM_138952	ENSMUSG00000041135	Ripk2	2210420D18Rik|CARD3|CARDIAK|CCK|D4Bwg0615e|RICK|RIP2	receptor (TNFRSF)-interacting serine-threonine kinase 2	protein-coding
chr3	65195446	65197470	intron (NM_001289450, intron 2 of 14)	L1Md_T|LINE|L1	8355	NM_001289450	16497	Mm.316402	NM_010597	ENSMUSG00000027827	Kcnab1	Akr8a8|Kvbeta1.1|mKv(beta)1	potassium voltage-gated channel, shaker-related subfamily, beta member 1	protein-coding
chr9	56223573	56223954	intron (NM_172924, intron 6 of 6)	LSU-rRNA_Hsa|rRNA|rRNA	-62693	NM_019793	56434	Mm.28484	NM_019793	ENSMUSG00000032324	Tspan3	1700055K04Rik|TM4-A|Tm4sf8	tetraspanin 3	protein-coding
chr17	56461958	56462999	promoter-TSS (NM_001252456)	promoter-TSS (NM_001252456)	-257	NM_001252456	19280	Mm.258771	NM_011218	ENSMUSG00000013236	Ptprs	AL022616|PTP|PTP-NU3|PTPNU-3|PTPsigma|Ptpt9|R-PTP-S|RPTPsigma	protein tyrosine phosphatase, receptor type, S	protein-coding
chrY	90765233	90769477	Intergenic	Intergenic	-12305	NR_137283	654820	Mm.34441	NM_001039559	ENSMUSG00000072844	G530011O06Rik	-	RIKEN cDNA G530011O06 gene	ncRNA
chr17	12636192	12637708	Intergenic	Intergenic	38888	NM_009202	20517	Mm.594	NM_009202	ENSMUSG00000023829	Slc22a1	Lx1|Oct1|Orct|Orct1	solute carrier family 22 (organic cation transporter), member 1	protein-coding
chr3	60045137	60045897	Intergenic	(CACAG)n|Simple_repeat|Simple_repeat	13729	NM_023383	67758	Mm.24547	NM_023383	ENSMUSG00000027761	Aadac	5033417E09Rik|AI265437|Aada	arylacetamide deacetylase	protein-coding
chr18	3004783	3006335	Intergenic	Intergenic	117853	NM_001167539	100312476	Mm.480293	NM_001167539	ENSMUSG00000091539	Vmn1r238	-	vomeronasal 1 receptor, 238	protein-coding
chr7	18937589	18938521	intron (NM_001029877, intron 1 of 3)	ZP3AR|Satellite|Satellite	12167	NM_001029877	384569	Mm.262724	NM_001029877	ENSMUSG00000030411	Nova2	Gm1424	neuro-oncological ventral antigen 2	protein-coding
chr12	20311476	20313244	Intergenic	CpG	503419	NR_015521	69513	Mm.273972	NR_015521	ENSMUSG00000099759	1700030C10Rik	-	RIKEN cDNA 1700030C10 gene	ncRNA
chr7	3572893	3573523	Intergenic	RLTR30E_MM|LTR|ERV1	42949	NM_001290377	232790	Mm.358882	NM_175632	ENSMUSG00000054594	Oscar	mOSCAR|mOSCAR-M1|mOSCAR-M2|mOSCAR-M3	osteoclast associated receptor	protein-coding
chr4	147274925	147276094	Intergenic	CpG	-167605	NM_001371349
chr4	146066945	146067860	promoter-TSS (NR_030771)	promoter-TSS (NR_030771)	-122	NR_030771	627585	Mm.424988	NM_001039233		Gm13034	-	SWI/SNF related, matrix associated, actin dependent regulator of chromatin, subfamily a, member 5 pseudogene	pseudo
chr2	30981817	30982539	promoter-TSS (NM_028846)	promoter-TSS (NM_028846)	-101	NM_028846	74270	Mm.346654	NM_028846	ENSMUSG00000026854	Usp20	1700055M05Rik|AI467231|Vdu2	ubiquitin specific peptidase 20	protein-coding
chr14	67715350	67716542	promoter-TSS (NM_175384)	promoter-TSS (NM_175384)	-105	NM_175384	108912	Mm.33831	NM_175384	ENSMUSG00000048922	Cdca2	2610311M19Rik|AI586158	cell division cycle associated 2	protein-coding
chr10	122096756	122097708	promoter-TSS (NM_153059)	promoter-TSS (NM_153059)	-62	NM_153059	216395	Mm.236764	NM_153059	ENSMUSG00000034620	Rxylt1	6330415D21Rik|Tmem5	ribitol xylosyltransferase 1	protein-coding
chr6	47653561	47656419	TTS (NR_002841).9	TTS (NR_002841).9	104	NR_002841	19799		NR_002841		Rn4.5s	-	4.5S RNA	rRNA
chr7	82771086	82771979	intron (NM_175317, intron 18 of 19)	intron (NM_175317, intron 18 of 19)	-15888	NR_046004	77800	Mm.444811	NR_046004	ENSMUSG00000086690	4933406J10Rik	A930009F24Rik	RIKEN cDNA 4933406J10 gene	ncRNA
chr2	160957516	160958072	intron (NR_126509, intron 33 of 35)	intron (NR_126509, intron 33 of 35)	-45455	NM_182840	280635	Mm.330747	NM_182840	ENSMUSG00000050700	Emilin3	1110013O17Rik|EMILIN-3|EMILIN-5|EMILIN-T|Emilin5	elastin microfibril interfacer 3	protein-coding
chr6	3200798	3201620	Intergenic	SSU-rRNA_Hsa|rRNA|rRNA	-87310	NR_036696	667335	Mm.380219	NR_036696	ENSMUSG00000106779	Gm8579	EG667335	spermatogenesis associated glutamate (E)-rich protein 4a pseudogene	pseudo
chr1	189194284	189195195	Intergenic	Intergenic	148614	NM_001159850	16526	Mm.33304	NM_010607	ENSMUSG00000037624	Kcnk2	A430027H14Rik|AI848635|TREK-1	potassium channel, subfamily K, member 2	protein-coding
chr7	44433362	44434091	Intergenic	ZP3AR|Satellite|Satellite	-8761	NM_198250	272381	Mm.44173	NM_198250	ENSMUSG00000047085	Lrrc4b	A830007M12|Lrig4	leucine rich repeat containing 4B	protein-coding
chr7	35333519	35334637	promoter-TSS (NM_027897)	promoter-TSS (NM_027897)	-159	NM_027897	52428	Mm.286600	NM_027897	ENSMUSG00000030494	Rhpn2	1300002E07Rik|AA536890|C85860|D7Ertd784e	rhophilin, Rho GTPase binding protein 2	protein-coding
chr1	178187348	178188355	5' UTR (NM_024282, exon 1 of 5)	5' UTR (NM_024282, exon 1 of 5)	434	NM_024282	78825	Mm.440132	NM_024282	ENSMUSG00000026502	Desi2	5830417C01Rik|DeSI-2|Fam152a|Pppde1	desumoylating isopeptidase 2	protein-coding
chr9	124256339	124257972	Intergenic	Intergenic	55539	NM_001243117	630836	Mm.458553	NM_001243117	ENSMUSG00000074829	2010315B03Rik	BC029716	RIKEN cDNA 2010315B03 gene	protein-coding
chrX	148882122	148882909	promoter-TSS (NM_001114383)	promoter-TSS (NM_001114383)	-61	NM_001114383	434865	Mm.473681	NM_001114383	ENSMUSG00000079387	Luzp4	-	leucine zipper protein 4	protein-coding
chr3	75556202	75557644	promoter-TSS (NM_019745)	promoter-TSS (NM_019745)	-71	NM_019745	56426	Mm.316473	NM_019745	ENSMUSG00000027835	Pdcd10	2410003B13Rik|Ccm3|Tfa15|Tfar15	programmed cell death 10	protein-coding
chr5	103026892	103027282	intron (NM_001310685, intron 2 of 11)	intron (NM_001310685, intron 2 of 11)	31305	NM_001310686	26414	Mm.39253	NM_009158	ENSMUSG00000046709	Mapk10	C230008H04Rik|JNK3|JNK3B1|JNK3B2|SAPK(beta)|Serk2|p493F12|p54bSAPK	mitogen-activated protein kinase 10	protein-coding
chr5	28099184	28099451	Intergenic	(CAGAC)n|Simple_repeat|Simple_repeat	27905	NM_153526	231070	Mm.30221	NM_153526	ENSMUSG00000045294	Insig1	1810013C12Rik|Insig-1	insulin induced gene 1	protein-coding
chr10	120216786	120217305	intron (NM_026617, intron 2 of 6)	C-rich|Low_complexity|Low_complexity	8219	NM_026617	68212	Mm.157426	NM_026617	ENSMUSG00000020225	Tmbim4	0610007H07Rik|AU022431	transmembrane BAX inhibitor motif containing 4	protein-coding
chr3	17733861	17735277	Intergenic	L1Md_T|LINE|L1	-55352	NR_033490	70441	Mm.458192	NR_033490	ENSMUSG00000100252	Mir124-2hg	100040120|2610100L16Rik|6430547I21Rik|A930005K07Rik|AW125202|Gm2612	Mir124-2 host gene (non-protein coding)	ncRNA
chr14	120350188	120350897	intron (NM_001360380, intron 2 of 7)	intron (NM_001360380, intron 2 of 7)	44090	NM_001360376	105559	Mm.238266	NM_175341	ENSMUSG00000022139	Mbnl2	1110002M11Rik|AI047808|AI837313|AI849185|AL118326|MBLL|R75232|mKIAA4072	muscleblind like splicing factor 2	protein-coding
chr12	100724480	100725585	promoter-TSS (NM_001330702)	promoter-TSS (NM_001330702)	88	NM_153587	73086	Mm.220417	NM_153587	ENSMUSG00000021180	Rps6ka5	3110005L17Rik|6330404E13Rik|AI854034|MSK1|MSPK1|RLPK|RLSK|S6K-alpha-5	ribosomal protein S6 kinase, polypeptide 5	protein-coding
chrX	76598573	76599124	intron (NM_001201395, intron 1 of 1)	SYNREP_MM|Satellite|Satellite	4076	NM_001201395	74987	Mm.107996	NM_001201395	ENSMUSG00000079525	Cldn34d	4930468A15Rik	claudin 34D	protein-coding
chr1	75316920	75318068	promoter-TSS (NM_016878)	promoter-TSS (NM_016878)	143	NM_001110831	13437	Mm.24680	NM_016878	ENSMUSG00000026209	Dnpep	AA407814	aspartyl aminopeptidase	protein-coding
chr6	47671188	47674408	promoter-TSS (NR_002841).6	promoter-TSS (NR_002841).6	-399	NR_002841	19799		NR_002841		Rn4.5s	-	4.5S RNA	rRNA
chr15	30093859	30095398	Intergenic	L1Md_T|LINE|L1	-77906	NM_001355502	18163	Mm.321648	NM_008729	ENSMUSG00000022240	Ctnnd2	Catnd2|Nprap|neurojugin	catenin (cadherin associated protein), delta 2	protein-coding
chr6	47683921	47686604	TTS (NR_002841)	TTS (NR_002841)	114	NR_002841	19799		NR_002841		Rn4.5s	-	4.5S RNA	rRNA
chr6	35345583	35347380	Intergenic	L1Md_F|LINE|L1	15635	NR_040526	73409	Mm.69443	NR_040526	ENSMUSG00000107341	1700065J11Rik	-	RIKEN cDNA 1700065J11 gene	ncRNA
chr14	61172489	61173475	intron (NM_172809, intron 2 of 9)	CpG	34525	NM_015788	50720	Mm.440703	NM_015788	ENSMUSG00000048279	Sacs	A230052M14|DNAJC29|E130115J16Rik	sacsin	protein-coding
chr14	18238181	18239660	5' UTR (NM_011584, exon 1 of 8)	5' UTR (NM_011584, exon 1 of 8)	186	NM_011584	353187	Mm.26587	NM_011584	ENSMUSG00000021775	Nr1d2	RVR|Rev-erb	nuclear receptor subfamily 1, group D, member 2	protein-coding
chr3	40949095	40950116	Intergenic	CpG	-1045	NM_001040399	214048	Mm.46782	NM_027663	ENSMUSG00000025762	Larp1b	1700108L22Rik|4933421B21Rik|AA690246|Larp2	La ribonucleoprotein domain family, member 1B	protein-coding
chr6	47679631	47682593	promoter-TSS (NR_002841).8	promoter-TSS (NR_002841).8	-54	NR_002841	19799		NR_002841		Rn4.5s	-	4.5S RNA	rRNA
chr4	101271959	101272586	Intergenic	MTEb|LTR|ERVL-MaLR	-6990	NM_146145	16451	Mm.289657	NM_013567	ENSMUSG00000028530	Jak1	AA960307|BAP004|C130039L05Rik	Janus kinase 1	protein-coding
chr2	3283493	3284748	promoter-TSS (NM_001290368)	promoter-TSS (NM_001290368)	-92	NM_001290368	18108	Mm.65021	NM_008708	ENSMUSG00000026643	Nmt2	A930001K02Rik|AI605445|AU044698|hNMT-2	N-myristoyltransferase 2	protein-coding
chr17	84957091	84958676	promoter-TSS (NR_027929)	promoter-TSS (NR_027929)	-118	NM_011151	19043	Mm.249695	NM_011151	ENSMUSG00000061130	Ppm1b	PP2CB	protein phosphatase 1B, magnesium dependent, beta isoform	protein-coding
chr9	21290796	21291875	promoter-TSS (NM_009878)	promoter-TSS (NM_009878)	-126	NM_009878	12581	Mm.29020	NM_009878	ENSMUSG00000096472	Cdkn2d	INK4d|p19|p19INK4d	cyclin dependent kinase inhibitor 2D	protein-coding
chr6	97011027	97011472	intron (NM_177233, intron 3 of 5)	(ACCTG)n|Simple_repeat|Simple_repeat	49162	NM_177233	320701	Mm.131700	NM_177233	ENSMUSG00000046500	Tafa4	C130034I18Rik|Fam19a4|Fam19a4 Tafa-4|Tafa-4	TAFA chemokine like family member 4	protein-coding
chr1	131526986	131528218	promoter-TSS (NM_175382)	promoter-TSS (NM_175382)	-241	NM_001081011	14270	Mm.276259	NM_019520	ENSMUSG00000026425	Srgap2	9930124L22Rik|AI448945|FBP2|Fnbp2|srGAP3	SLIT-ROBO Rho GTPase activating protein 2	protein-coding
chr1	92179968	92181092	promoter-TSS (NM_207225)	promoter-TSS (NM_207225)	-189	NM_207225	208727	Mm.318567	NM_207225	ENSMUSG00000026313	Hdac4	4932408F19Rik|HD4	histone deacetylase 4	protein-coding
chr7	37353185	37353747	Intergenic	ZP3AR|Satellite|Satellite	416286	NM_172385	243937	Mm.322505	NM_172385	ENSMUSG00000043456	Zfp536	9630010P11Rik|Znf536|mKIAA0390	zinc finger protein 536	protein-coding
chr9	57075743	57077468	promoter-TSS (NR_152107)	promoter-TSS (NR_152107)	229	NM_011378	20466	Mm.15755	NM_011378	ENSMUSG00000042557	Sin3a	AW553200|Sin3|mKIAA4126|mSin3A	transcriptional regulator, SIN3A (yeast)	protein-coding
chr17	80468477	80468767	intron (NM_009231, intron 1 of 21)	(CACAC)n|Simple_repeat|Simple_repeat	11831	NM_009231	20662	Mm.60975	NM_009231	ENSMUSG00000024241	Sos1	4430401P03Rik|9630010N06|AI449023	SOS Ras/Rac guanine nucleotide exchange factor 1	protein-coding
chr7	44929188	44930044	promoter-TSS (NM_007458)	promoter-TSS (NM_007458)	-126	NM_001077264	11771	Mm.6877	NM_007458	ENSMUSG00000060279	Ap2a1	Adtaa	adaptor-related protein complex 2, alpha 1 subunit	protein-coding
chr6	47666488	47668287	TTS (NR_002841).5	TTS (NR_002841).5	704	NR_002841	19799		NR_002841		Rn4.5s	-	4.5S RNA	rRNA
chrX	14570392	14572573	Intergenic	L1Md_T|LINE|L1	360334	NM_001034100	385328	Mm.275681	NM_001034100	ENSMUSG00000078346	H2al1n	EG385328|Gm5382	H2A histone family member L1N	protein-coding
chr11	3149491	3151601	intron (NM_001363224, intron 11 of 28)	(CA)n|Simple_repeat|Simple_repeat	26544	NR_003517	236604	Mm.247625	NM_001004146		Pisd-ps1	-	phosphatidylserine decarboxylase, pseudogene 1	pseudo
chrX	91841020	91844321	Intergenic	L1Md_T|LINE|L1	-59694	NM_028847	74271	Mm.141337	NM_028847	ENSMUSG00000061392	Mageb5	1700056A17Rik|mMage-b5	melanoma antigen, family B, 5	protein-coding
chr3	148639717	148640133	Intergenic	Intergenic	314710	NM_001081298	99633	Mm.9776	NM_001081298	ENSMUSG00000028184	Adgrl2	AI450192|CIRL-2|Gm619|Lec1|Lphh1|Lphn2|mKIAA0786	adhesion G protein-coupled receptor L2	protein-coding
chr18	34859887	34862182	promoter-TSS (NM_007913)	promoter-TSS (NM_007913)	-173	NM_007913	13653	Mm.181959	NM_007913	ENSMUSG00000038418	Egr1	A530045N19Rik|ETR103|Egr-1|Krox-1|Krox-24|Krox24|NGF1-A|NGFI-A|NGFIA|TIS8|Zenk|Zfp-6|Zif268|egr	early growth response 1	protein-coding
chr5	45449834	45450621	promoter-TSS (NM_024236)	promoter-TSS (NM_024236)	2	NM_024236	110391	Mm.30204	NM_024236	ENSMUSG00000015806	Qdpr	2610008L04Rik|D5Ertd371e|Dhpr|PKU2	quinoid dihydropteridine reductase	protein-coding
chr5	144357841	144358812	promoter-TSS (NR_102372)	promoter-TSS (NR_102372)	-199	NR_102372	100579137		NR_102372	ENSMUSG00000104600	Dmrt1i	Dmr	Dmrt1 interacting ncRNA	ncRNA
chr11	3126581	3130333	intron (NR_003517, intron 3 of 6)	intron (NR_003517, intron 3 of 6)	4455	NR_003517	236604	Mm.247625	NM_001004146		Pisd-ps1	-	phosphatidylserine decarboxylase, pseudogene 1	pseudo
chr13	69611054	69612087	promoter-TSS (NM_145354)	promoter-TSS (NM_145354)	-107	NM_175283	78925	Mm.451912	NM_175283	ENSMUSG00000021594	Srd5a1	0610031P22Rik|4930435F02Rik|S5AR 1|Srd5a-1	steroid 5 alpha-reductase 1	protein-coding
chr18	21299652	21300879	promoter-TSS (NM_001033445)	promoter-TSS (NM_001033445)	-126	NM_001033445	381126	Mm.312276	NM_001033445	ENSMUSG00000042680	Garem1	C86169|Fam59a|Garem|Gm944|mKIAA4238	GRB2 associated regulator of MAPK1 subtype 1	protein-coding
chrX	135086772	135087446	Intergenic	Intergenic	-26773	NR_040282	320606	Mm.439072	NR_040281	ENSMUSG00000089759	3632454L22Rik	-	RIKEN cDNA 3632454L22 gene	ncRNA
chr8	123537404	123624214	Intergenic	(CA)n|Simple_repeat|Simple_repeat	-14722	NR_046155	100861502		NR_046155	ENSMUSG00000095350	Gm23284	Rn5s31	predicted gene, 23284	rRNA
chr6	47662949	47665625	promoter-TSS (NR_002841).4	promoter-TSS (NR_002841).4	-532	NR_002841	19799		NR_002841		Rn4.5s	-	4.5S RNA	rRNA
chr17	57031221	57032502	promoter-TSS (NM_010613)	promoter-TSS (NM_010613)	-354	NM_010613	16549	Mm.34296	NM_010613	ENSMUSG00000007670	Khsrp	6330409F21Rik|Fbp2|Fubp2|Ksrp	KH-type splicing regulatory protein	protein-coding
chr4	107253042	107254130	promoter-TSS (NM_029985)	promoter-TSS (NM_029985)	-53	NM_029985	77809	Mm.29681	NM_029985	ENSMUSG00000028617	Lrrc42	A930011F22Rik|AA536996	leucine rich repeat containing 42	protein-coding
chr17	15544095	15544875	exon (NM_144809, exon 10 of 10)	exon (NM_144809, exon 10 of 10)	-17184	NM_008799	18567	Mm.323	NM_008799	ENSMUSG00000014771	Pdcd2	AI528543|Pcd2|RP-8	programmed cell death 2	protein-coding
chr17	24549513	24550687	5' UTR (NM_013630, exon 1 of 46)	5' UTR (NM_013630, exon 1 of 46)	150	NM_013630	18763	Mm.30435	NM_013630	ENSMUSG00000032855	Pkd1	PC1|mFLJ00285	polycystin 1, transient receptor poteintial channel interacting	protein-coding
chr2	52696494	52698977	intron (NM_019667, intron 13 of 13)	intron (NM_019667, intron 13 of 13)	-21126	NM_001037099	12298	Mm.330223	NM_146123	ENSMUSG00000017412	Cacnb4	3110038O15Rik|Cchb4|lh	calcium channel, voltage-dependent, beta 4 subunit	protein-coding
chr10	58223154	58225626	Intergenic	Intergenic	8285	NM_001081954	664783	Mm.482575	NM_001081954		Dux	AW822073|Dux4|Duxbl|EG664783	double homeobox	protein-coding
chr13	110743974	110744540	Intergenic	(CCCTAA)n|Simple_repeat|Simple_repeat	-159242	NR_131193	75139	Mm.490931	NR_131193	ENSMUSG00000114472	Gm38397	-	predicted gene, 38397	ncRNA
chr14	61556419	61557159	promoter-TSS (NM_001310603)	promoter-TSS (NM_001310603)	97	NM_001310603	66674	Mm.282706	NM_025697	ENSMUSG00000021930	Spryd7	6330409N04Rik|Clld6	SPRY domain containing 7	protein-coding
chr11	109611327	109612122	promoter-TSS (NM_145940)	promoter-TSS (NM_145940)	-335	NM_145940	52639	Mm.35817	NM_145940	ENSMUSG00000041895	Wipi1	4930533H01Rik|AW411817|D11Ertd498e	WD repeat domain, phosphoinositide interacting 1	protein-coding
chr13	29070783	29072759	Intergenic	L1Md_T|LINE|L1	55516	NR_045073	77920	Mm.197051	NR_045073	ENSMUSG00000086363	A330102I10Rik	-	RIKEN cDNA A330102I10 gene	ncRNA
chr5	67155585	67155954	Intergenic	(CCCCAG)n|Simple_repeat|Simple_repeat	-56643	NM_008888	18935	Mm.62505	NM_008888	ENSMUSG00000012520	Phox2b	Dilp1|NBPhox|Pmx2b|Px2b	paired-like homeobox 2b	protein-coding
chr9	80956080	80958309	Intergenic	L1Md_T|LINE|L1	-491756	NM_022016	63859	Mm.422780	NM_022016	ENSMUSG00000032343	Impg1	A930015H12Rik|IMP150|SPACR	interphotoreceptor matrix proteoglycan 1	protein-coding
chr5	88764607	88765466	promoter-TSS (NM_007832)	promoter-TSS (NM_007832)	23	NM_007832	13178	Mm.298892	NM_007832	ENSMUSG00000029366	Dck	-	deoxycytidine kinase	protein-coding
chr17	31564058	31565199	promoter-TSS (NM_016670)	promoter-TSS (NM_016670)	-145	NR_027493	18771	Mm.259295	NM_016670	ENSMUSG00000006705	Pknox1	D17Wsu76e|PREP1	Pbx/knotted 1 homeobox	protein-coding
chrX	125999861	126000452	Intergenic	Intergenic	833848	NM_177705	237029	Mm.60998	NM_177705	ENSMUSG00000058670	4932411N23Rik	-	RIKEN cDNA 4932411N23 gene	protein-coding
chr8	57511238	57512384	promoter-TSS (NM_008252)	promoter-TSS (NM_008252)	-32	NM_001363443	97165	Mm.276881	NM_008252	ENSMUSG00000054717	Hmgb2	C80539|HMG-2|Hmg2	high mobility group box 2	protein-coding
chr11	9249860	9250208	intron (NM_178259, intron 4 of 61)	intron (NM_178259, intron 4 of 61)	58092	NM_178259	268379	Mm.39270	NM_178259	ENSMUSG00000004668	Abca13	9830132L24|A930002G16Rik|AI956815	ATP-binding cassette, sub-family A (ABC1), member 13	protein-coding
chr4	52085642	52087514	Intergenic	L1Md_T|LINE|L1	-35468	NR_040668	329844	Mm.128934	NR_040668	ENSMUSG00000085515	C630028M04Rik	-	RIKEN cDNA C630028M04 gene	ncRNA
chr11	20200734	20201958	promoter-TSS (NM_008996)	promoter-TSS (NM_008996)	-66	NM_008996	19324	Mm.271944	NM_008996	ENSMUSG00000020149	Rab1a	Gtbp|Rab-1|Rab1|Ypt1|mKIAA3012	RAB1A, member RAS oncogene family	protein-coding
chr2	154790563	154791449	promoter-TSS (NM_023130)	promoter-TSS (NM_023130)	-104	NM_001139512	19383	Mm.221440	NM_023130	ENSMUSG00000027593	Raly	AI663842|Merc	hnRNP-associated with lethal yellow	protein-coding
chr7	14086386	14088373	intron (NM_001101586, intron 3 of 5)	L1Md_T|LINE|L1	35669	NM_001101586	629203		NM_001101586	ENSMUSG00000074375	Sult2a3	Gm6955	sulfotransferase family 2A, dehydroepiandrosterone (DHEA)-preferring, member 3	protein-coding
chrY	90811284	90813154	intron (NM_133362, intron 2 of 3)	IMPB_01|Satellite|Satellite	26777	NR_137282	170942	Mm.76062	NM_133362	ENSMUSG00000096768	Erdr1	edr	erythroid differentiation regulator 1	protein-coding
chr3	35680472	35680925	Intergenic	(TG)n|Simple_repeat|Simple_repeat	-14535	NR_040748	625963	Mm.251506	NR_040748	ENSMUSG00000105662	Gm6639	-	predicted gene 6639	ncRNA
chr3	66634153	66636027	Intergenic	L1Md_T|LINE|L1	-338253	NM_145820	72789	Mm.443526	NM_028357	ENSMUSG00000027831	Veph1	2810471M23Rik|Veph	ventricular zone expressed PH domain-containing 1	protein-coding
chr1	117253615	117254827	Intergenic	L1Md_T|LINE|L1	1056507	NR_153836	22099	Mm.426637	NM_011650	ENSMUSG00000026374	Tsn	2610034C24Rik|AU040286|C3PO|TB-RBP	translin	protein-coding
chr19	4509946	4510945	promoter-TSS (NM_001162946)	promoter-TSS (NM_001162946)	-27	NM_001162946	18563	Mm.1845	NM_008797	ENSMUSG00000024892	Pcx	Pc|Pcb	pyruvate carboxylase	protein-coding
chr13	47043133	47044125	promoter-TSS (NM_016785)	promoter-TSS (NM_016785)	130	NM_172262	218214	Mm.31259	NM_172262	ENSMUSG00000038080	Kdm1b	4632428N09Rik|AI482520|Aof1	lysine (K)-specific demethylase 1B	protein-coding
chr12	18386970	18388373	Intergenic	CpG	-126839	NM_001033157	236366	Mm.352227	NM_001033157	ENSMUSG00000073197	5730507C01Rik	-	RIKEN cDNA 5730507C01 gene	protein-coding
chr6	47772791	47773231	Intergenic	Intergenic	-20086	NR_002841	19799		NR_002841		Rn4.5s	-	4.5S RNA	rRNA
chr5	17244225	17247177	Intergenic	L1Md_T|LINE|L1	-230421	NM_027609	70935	Mm.332225	NM_027609	ENSMUSG00000058643	Speer4f1	4922502J04Rik|SPEER-4F|Speer4f	spermatogenesis associated glutamate (E)-rich protein 4F1	protein-coding
chr11	23255003	23256316	promoter-TSS (NM_134014)	promoter-TSS (NM_134014)	-382	NM_134014	103573	Mm.217547	NM_134014	ENSMUSG00000020290	Xpo1	AA420417|Crm1|Exp1	exportin 1	protein-coding
chr6	47675156	47677136	TTS (NR_002841).7	TTS (NR_002841).7	591	NR_002841	19799		NR_002841		Rn4.5s	-	4.5S RNA	rRNA
chr11	106083884	106084792	promoter-TSS (NM_011947)	promoter-TSS (NM_011947)	-564	NM_011947	26406	Mm.27041	NM_011947	ENSMUSG00000020700	Map3k3	AW548911|MAPKKK3|Mekk3|mKIAA4031	mitogen-activated protein kinase kinase kinase 3	protein-coding
chrX	148304716	148305126	intron (NM_001122734, intron 4 of 6).4	intron (NM_001122734, intron 4 of 6).4	-9609	NM_001122734	100039934	Mm.474426	NM_001122734	ENSMUSG00000095621	Gm15085	-	predicted gene 15085	protein-coding
chr1	37864503	37865502	promoter-TSS (NM_207228)	promoter-TSS (NM_207228)	80	NM_207228	211484	Mm.332756	NM_207228	ENSMUSG00000060771	Tsga10	4933432N21Rik|AI843383|Gm217|Mtsga10	testis specific 10	protein-coding
chr5	140704435	140705222	promoter-TSS (NR_074085)	promoter-TSS (NR_074085)	-183	NR_074085	231841	Mm.271932	NM_172724	ENSMUSG00000000148	Brat1	AA881470|Baat1	BRCA1-associated ATM activator 1	protein-coding
chr5	138279588	138280747	promoter-TSS (NM_172412)	promoter-TSS (NM_172412)	-230	NM_172412	71951	Mm.77066	NM_172412	ENSMUSG00000029510	Gpc2	2410016G05Rik	glypican 2 (cerebroglycan)	protein-coding
chr17	13588515	13591578	Intergenic	Intergenic	-35952	NR_045436	72578	Mm.46549	NR_045436	ENSMUSG00000117042	2700054A10Rik	-	RIKEN cDNA 2700054A10 gene	ncRNA
chrX	15399373	15400795	Intergenic	L1Md_T|LINE|L1	-288595	NR_033171	67395	Mm.50369	NM_026128	ENSMUSG00000045217	Ppp1r2-ps9	4930403L05Rik	protein phosphatase 1, regulatory (inhibitor) subunit 2, pseudogene 9	pseudo
chr15	91906624	91910345	Intergenic	Intergenic	70156	NM_198927	223809	Mm.486225	NM_198927	ENSMUSG00000047295	Smgc	2310010P21Rik|DXImx49e|Muc19|Muc19/Smgc|Sfc21	submandibular gland protein C	protein-coding
chr7	118243037	118244251	promoter-TSS (NR_027879)	promoter-TSS (NR_027879)	-7	NM_001031814	233789	Mm.309053	NM_177180	ENSMUSG00000030655	Smg1	2610207I05Rik|5430435M13Rik|C130002K18Rik|mKIAA0421	SMG1 homolog, phosphatidylinositol 3-kinase-related kinase (C. elegans)	protein-coding
chr17	7169587	7170796	promoter-TSS (NM_011299)	promoter-TSS (NM_011299)	76	NM_011299	20112	Mm.268383	NM_011299	ENSMUSG00000023809	Rps6ka2	90kDa|D17Wsu134e|Rps6ka-rs1|Rsk3|p90rsk|pp90rsk	ribosomal protein S6 kinase, polypeptide 2	protein-coding
chr16	42875056	42876370	promoter-TSS (NR_040522)	promoter-TSS (NR_040522)	49	NR_040522	75722	Mm.243747	NR_040521	ENSMUSG00000075070	4932412D23Rik	Gm10809	RIKEN cDNA 4932412D23 gene	ncRNA
chr12	3235205	3240020	non-coding (NR_015551, exon 3 of 7)	non-coding (NR_015551, exon 3 of 7)	1821	NR_015551	74173	Mm.309774	NM_028796	ENSMUSG00000079179	Rab10os	1700012B15Rik|1810036A22Rik	RAB10, member RAS oncogene family, opposite strand	ncRNA
chr3	37419121	37420706	promoter-TSS (NM_001163511)	promoter-TSS (NM_001163511)	-37	NM_001310473	57815	Mm.172679	NM_021343	ENSMUSG00000027722	Spata5	2510048F20Rik|C78064|Spaf	spermatogenesis associated 5	protein-coding
chr7	19628437	19629884	intron (NM_009046, intron 1 of 10)	CpG	278	NM_009046	19698	Mm.1741	NM_009046	ENSMUSG00000002983	Relb	shep	avian reticuloendotheliosis viral (v-rel) oncogene related B	protein-coding
chr16	3974485	3974838	intron (NM_001081280, intron 1 of 17)	intron (NM_001081280, intron 1 of 17)	1971	NM_175547	268857	Mm.215994	NM_175547	ENSMUSG00000049871	Nlrc3	CLR16.2|D230007K08Rik|mFLJ00348	NLR family, CARD domain containing 3	protein-coding
chr6	90988684	90989505	Intergenic	Intergenic	127732	NM_018815	54563	Mm.28162	NM_018815	ENSMUSG00000030091	Nup210	9830001L10|AI836801|Pom210|gp190|gp210	nucleoporin 210	protein-coding
chr19	6979609	6980551	promoter-TSS (NM_001360288)	promoter-TSS (NM_001360288)	6	NM_001360286	14227	Mm.4234	NM_008020	ENSMUSG00000056629	Fkbp2	mFKBP13|mFKBP2	FK506 binding protein 2	protein-coding
chrX	124612259	124612850	Intergenic	Intergenic	-476644	NM_001100616	100038941	Mm.388852	NM_001100616	ENSMUSG00000072049	Vmn2r121	EG625699	vomeronasal 2, receptor 121	protein-coding
chr1	47628994	47630345	Intergenic	L1Md_F|LINE|L1	-162544	NR_105768	102466969		NR_105768	ENSMUSG00000098876	Mir6350	Gm27958|mmu-mir-6350	microRNA 6350	ncRNA
chr5	134007007	134007614	Intergenic	Intergenic	-92438	NM_030719	80909	Mm.45218	NM_030719	ENSMUSG00000015944	Castor2	7530428J21Rik|AW742413|Gats|Gatsl1|Gatsl2	cytosolic arginine sensor for mTORC1 subunit 2	protein-coding
chr7	139388629	139389366	promoter-TSS (NM_001127363)	promoter-TSS (NM_001127363)	-112	NM_183144	212111	Mm.28308	NM_183144	ENSMUSG00000025477	Inpp5a	-	inositol polyphosphate-5-phosphatase A	protein-coding
chr7	105399583	105400602	promoter-TSS (NM_001242365)	promoter-TSS (NM_001242365)	-38	NM_001242363	74349	Mm.30254	NM_199009	ENSMUSG00000044465	Fam160a2	4632419K20Rik|6530415H11Rik|FHIP	family with sequence similarity 160, member A2	protein-coding
chrY	6785449	6787770	Intergenic	L1_Mus2|LINE|L1	381168	NM_001101623	100040160	Mm.482062	NM_001101623	ENSMUSG00000094081	Gm20826	-	predicted gene, 20826	protein-coding
chr9	113988686	113989305	intron (NM_178624, intron 9 of 14)	CpG	37756	NM_178624	72179	Mm.386808	NM_178624	ENSMUSG00000032507	Fbxl2	2810423A21Rik|Fbl3	F-box and leucine-rich repeat protein 2	protein-coding
chr7	28435951	28437080	promoter-TSS (NM_001290550)	promoter-TSS (NM_001290550)	-324	NM_175021	233033	Mm.54120	NM_175021	ENSMUSG00000109336	Samd4b	BC042901	sterile alpha motif domain containing 4B	protein-coding
chr6	86668893	86669767	promoter-TSS (NM_010751)	promoter-TSS (NM_010751)	-171	NM_010751	17119	Mm.279580	NM_010751	ENSMUSG00000001156	Mxd1	AW122478|Mad|Mad1	MAX dimerization protein 1	protein-coding
chr4	142274403	142274834	Intergenic	Intergenic	-35217	NM_001109685	71529	Mm.255986	NM_144531	ENSMUSG00000040606	Kazn	2310007B04Rik|9030409G11Rik|AI256607|AI666764|AW061099|Kaz|Kazrin	kazrin, periplakin interacting protein	protein-coding
chr6	135826517	135827289	intron (NM_001363750, intron 6 of 14)	intron (NM_001363750, intron 6 of 14)	167990	NR_126088	75024	Mm.399147	NR_126088	ENSMUSG00000107396	4930425L21Rik	4930473P14Rik	RIKEN cDNA 4930425L21 gene	ncRNA
chrX	149088147	149088532	promoter-TSS (NM_011022).6	promoter-TSS (NM_011022).6	24	NM_011022	18422	Mm.420007	NM_011022	ENSMUSG00000094885	Ott	AV272316	ovary testis transcribed	protein-coding
chr9	53705871	53706754	promoter-TSS (NM_175562)	promoter-TSS (NM_175562)	-80	NM_175562	270160	Mm.290285	NM_175562	ENSMUSG00000055069	Rab39	C230094F14Rik|Rab39a	RAB39, member RAS oncogene family	protein-coding
chr14	120477291	120478680	promoter-TSS (NM_029519)	promoter-TSS (NM_029519)	-476	NM_029519	76108	Mm.261448	NM_029519	ENSMUSG00000051615	Rap2a	5830461H18Rik	RAS related protein 2a	protein-coding
chr6	145746130	145746953	promoter-TSS (NM_027760)	promoter-TSS (NM_027760)	-246	NM_027760	71323	Mm.158669	NM_027760	ENSMUSG00000030259	Rassf8	5133400D11Rik|AA815821|AW123240|Hoj1|mHoj-1	Ras association (RalGDS/AF-6) domain family (N-terminal) member 8	protein-coding
chr8	4492864	4493791	promoter-TSS (NM_026058)	promoter-TSS (NM_026058)	-78	NM_026058	67260	Mm.35511	NM_026058	ENSMUSG00000008206	Cers4	2900019C14Rik|Lass4|Trh1	ceramide synthase 4	protein-coding
chr18	7626572	7627231	promoter-TSS (NM_001161620)	promoter-TSS (NM_001161620)	-38	NM_001161620	75739	Mm.133293	NM_001081287	ENSMUSG00000057440	Mpp7	1110068J02Rik|2810038M04Rik|5430426E14Rik|AI415104|Gm955	membrane protein, palmitoylated 7 (MAGUK p55 subfamily member 7)	protein-coding
chr14	21499524	21501626	intron (NM_017479, intron 1 of 16)	CpG	790	NM_017479	54169	Mm.248967	NM_017479	ENSMUSG00000021767	Kat6b	AI507552|B130044K16Rik|MYST-4|Morf|Myst4|mKIAA0383|qkf|querkopf	K(lysine) acetyltransferase 6B	protein-coding
chr7	99140886	99141584	promoter-TSS (NM_178635)	promoter-TSS (NM_178635)	-91	NM_178635	78610	Mm.323072	NM_178635	ENSMUSG00000035354	Uvrag	9530039D02Rik|AI648770|BB124205|Uvrag1|Uvragl	UV radiation resistance associated gene	protein-coding
chr10	58322928	58323824	promoter-TSS (NM_026148)	promoter-TSS (NM_026148)	-171	NM_001359115	110829	Mm.57734	NM_026148	ENSMUSG00000019920	Lims1	2310016J22Rik|4921524A02Rik|AI507642|AU021743|AW551584|C430041B13Rik|Lims1l|PINCH|PINCH1	LIM and senescent cell antigen-like domains 1	protein-coding
chr3	40893814	40894435	promoter-TSS (NR_160689)	promoter-TSS (NR_160689)	-139	NR_160689	100039027	Mm.482948	NR_038067		Gm2011	-	predicted gene 2011	pseudo
chr8	46470706	46471603	5' UTR (NM_007981, exon 1 of 21)	5' UTR (NM_007981, exon 1 of 21)	117	NM_007981	14081	Mm.210323	NM_007981	ENSMUSG00000018796	Acsl1	Acas|Acas1|Acs|FACS|Facl2|LACS 1|LACS1	acyl-CoA synthetase long-chain family member 1	protein-coding
chr3	38484421	38485374	promoter-TSS (NM_001167883)	promoter-TSS (NM_001167883)	-81	NM_001167883	99696	Mm.290937	NM_001033198	ENSMUSG00000044864	Ankrd50	AI662170|E430012K20Rik|mKIAA1223|mKIAA3019	ankyrin repeat domain 50	protein-coding
chr13	85844387	85845723	Intergenic	L1Md_T|LINE|L1	201740	NM_007749	12867	Mm.378898	NM_007749	ENSMUSG00000017778	Cox7c	COXVIIc|Cox7c1	cytochrome c oxidase subunit 7C	protein-coding
chr8	70839117	70840073	5' UTR (NM_027560, exon 1 of 8)	5' UTR (NM_027560, exon 1 of 8)	125	NM_027560	70807	Mm.24215	NM_027560	ENSMUSG00000002910	Arrdc2	4632416I05Rik|Ilad1	arrestin domain containing 2	protein-coding
chr8	72160761	72161573	promoter-TSS (NM_023126)	promoter-TSS (NM_023126)	-33	NM_023126	17274	Mm.162811	NM_023126	ENSMUSG00000003037	Rab8a	AA409338|Mel	RAB8A, member RAS oncogene family	protein-coding
chr4	147186988	147187908	Intergenic	CpG	-119012	NR_045446	71270	Mm.460830	NR_045446	ENSMUSG00000093617	4933438K21Rik	-	RIKEN cDNA 4933438K21 gene	ncRNA
chr17	64331731	64332605	promoter-TSS (NM_001025309)	promoter-TSS (NM_001025309)	-285	NM_144859	224938	Mm.489681	NM_144859	ENSMUSG00000024083	Pja2	AI447901|AL022700|Neurodap1|mKIAA0438	praja ring finger ubiquitin ligase 2	protein-coding
chr8	4165757	4166551	promoter-TSS (NM_001346730)	promoter-TSS (NM_001346730)	-413	NM_001368792	213027	Mm.437106	NM_153536	ENSMUSG00000011832	Evi5l	1700084G18Rik|2310039H16Rik|3110007G05Rik|B130050I23Rik	ecotropic viral integration site 5 like	protein-coding
chr5	14921438	14921976	Intergenic	Lx2A1|LINE|L1	-6818	NM_198666	381714	Mm.368256	NM_198666	ENSMUSG00000033219	Gm9758	-	predicted gene 9758	protein-coding
chr15	102405302	102406822	promoter-TSS (NM_013672)	promoter-TSS (NM_013672)	-254	NM_013672	20683	Mm.4618	NM_013672	ENSMUSG00000001280	Sp1	1110003E12Rik|AA450830|AI845540|Sp1-1	trans-acting transcription factor 1	protein-coding
chr7	3644400	3645671	promoter-TSS (NM_146176)	promoter-TSS (NM_146176)	-234	NM_146176	232791	Mm.358731	NM_146176	ENSMUSG00000035632	Cnot3	A930039N10Rik	CCR4-NOT transcription complex, subunit 3	protein-coding
chr12	97819957	97821231	Intergenic	L1Md_T|LINE|L1	438865	NM_008079	14420	Mm.5120	NM_008079	ENSMUSG00000021003	Galc	2310068B06Rik|A930008M05Rik|AW212969|AW413532|Gacy|twi|twitcher	galactosylceramidase	protein-coding
chr18	40308078	40308359	intron (NM_026135, intron 2 of 2)	intron (NM_026135, intron 2 of 2)	51219	NM_001371040
chr7	138829910	138830437	Intergenic	CpG	16094	NM_027115	69546	Mm.31598	NM_027115	ENSMUSG00000041775	Mapk1ip1	2310009E07Rik|AU043776|MISS	mitogen-activated protein kinase 1 interacting protein 1	protein-coding
chr16	93711106	93712394	promoter-TSS (NM_026700)	promoter-TSS (NM_026700)	-157	NM_026700	70028	Mm.23230	NM_026700	ENSMUSG00000022946	Dop1b	0610038M01Rik|2610510B01Rik|AI503246|C21orf5|Dopey2|mKIAA0933	DOP1 leucine zipper like protein B	protein-coding
chr5	103858415	103859295	Intergenic	Intergenic	52404	NM_178741	246293	Mm.179871	NM_178741	ENSMUSG00000029312	Klhl8	2310001P09Rik|D5Ertd431e	kelch-like 8	protein-coding
chr6	60312197	60313942	Intergenic	L1Md_T|LINE|L1	90638	NR_160795	208079	Mm.131226	NM_177329	ENSMUSG00000046764	A530053G22Rik	-	RIKEN cDNA A530053G22 gene	ncRNA
chr5	36237866	36239979	intron (NM_030889, intron 1 of 26)	L1Md_T|LINE|L1	34901	NM_175249	76943	Mm.44242	NM_175249	ENSMUSG00000043430	Psapl1	2310020A21Rik	prosaposin-like 1	protein-coding
chr13	17694559	17695807	promoter-TSS (NM_138654)	promoter-TSS (NM_138654)	-230	NM_025479	66308	Mm.291109	NM_025479	ENSMUSG00000012429	Mplkip	2810021B07Rik|C330007M08Rik|Ttdn1	M-phase specific PLK1 intereacting protein	protein-coding
chr6	52962199	52962808	intron (NM_173406, intron 1 of 4)	intron (NM_173406, intron 1 of 4)	-52883	NM_001168277	231986	Mm.386865	NM_173406	ENSMUSG00000063568	Jazf1	AI591476|C820002C15|Jaz1|Tip27	JAZF zinc finger 1	protein-coding
chr1	89069964	89070775	promoter-TSS (NM_133816)	promoter-TSS (NM_133816)	-46	NM_133816	98402	Mm.170983	NM_133816	ENSMUSG00000036206	Sh3bp4	AI594717|AW227605|BOG25	SH3-domain binding protein 4	protein-coding
chr2	46281840	46282264	Intergenic	(CCTCG)n|Simple_repeat|Simple_repeat	585447	NR_040497	69405	Mm.396184	NR_040497	ENSMUSG00000086202	1700019E08Rik	-	RIKEN cDNA 1700019E08 gene	ncRNA
chr5	141782762	141783215	intron (NM_177879, intron 4 of 44)	ZP3AR|Satellite|Satellite	541454	NM_177879	330222	Mm.151931	NM_177879	ENSMUSG00000039683	Sdk1	5330440E10|6720466O15Rik	sidekick cell adhesion molecule 1	protein-coding
chr7	29100989	29101660	intron (NM_009109, intron 20 of 105)	ZP3AR|Satellite|Satellite	-17630	NR_035489	100316710		NR_035489	ENSMUSG00000089219	Mir1963	mir-1963|mmu-mir-1963	microRNA 1963	ncRNA
chr7	19749153	19749966	promoter-TSS (NM_001159724)	promoter-TSS (NM_001159724)	14	NM_008990	19294	Mm.4341	NM_008990	ENSMUSG00000062300	Nectin2	AI325026|AI987993|Cd112|MPH|Pvr|Pvrl2|Pvs|nectin-2	nectin cell adhesion molecule 2	protein-coding
chr9	21545833	21546898	promoter-TSS (NM_153141)	promoter-TSS (NM_153141)	-529	NM_153141	59035	Mm.178115	NM_021531	ENSMUSG00000032185	Carm1	Prmt4	coactivator-associated arginine methyltransferase 1	protein-coding
chr18	80150984	80152209	promoter-TSS (NM_175028)	promoter-TSS (NM_175028)	-114	NM_175028	240442	Mm.26594	NM_175028	ENSMUSG00000053950	Adnp2	8430420L05Rik|BC024969|Kiaa0863|Zfp508|mKIAA0863	ADNP homeobox 2	protein-coding
chr2	34904751	34905446	intron (NM_028716, intron 6 of 14)	intron (NM_028716, intron 6 of 14)	8878	NM_028716	74016	Mm.65691	NM_028716	ENSMUSG00000026873	Phf19	3110009G19Rik|3321402G02Rik	PHD finger protein 19	protein-coding
chr8	47390612	47391084	Intergenic	ORR1A2|LTR|ERVL-MaLR	-38500	NM_175162	71069	Mm.23973	NM_175162	ENSMUSG00000038143	Stox2	4933409N07Rik|AI449080|AI835114|mKIAA1392	storkhead box 2	protein-coding
chr5	135544938	135545901	promoter-TSS (NM_146001)	promoter-TSS (NM_146001)	-297	NM_146001	215114	Mm.280805	NM_146001	ENSMUSG00000039959	Hip1	2610109B09Rik|A930014B11Rik|E130315I21Rik|mKIAA4113	huntingtin interacting protein 1	protein-coding
chr2	20899853	20900168	intron (NM_001128084, intron 3 of 24)	LSU-rRNA_Hsa|rRNA|rRNA	67711	NM_001128084	71435	Mm.28507	NM_001081364	ENSMUSG00000036591	Arhgap21	5530401C11Rik|AA416458|ARHGAP10	Rho GTPase activating protein 21	protein-coding
chr11	3166388	3169848	intron (NM_001363224, intron 9 of 28)	RLTR21|LTR|ERVK	25485	NM_030207	78887	Mm.394071	NM_030207	ENSMUSG00000023764	Sfi1	-	Sfi1 homolog, spindle assembly associated (yeast)	protein-coding
chr11	20542201	20543682	promoter-TSS (NM_021372)	promoter-TSS (NM_021372)	-225	NM_021372	58172	Mm.339676	NM_021372	ENSMUSG00000049800	Sertad2	AB041541|AU021878|Kiaa0127|MNCb-1504|SEI-2|Sei2|TRIP-Br2|mKIAA0127	SERTA domain containing 2	protein-coding
chr2	76647491	76648461	promoter-TSS (NM_011871)	promoter-TSS (NM_011871)	51	NM_011871	23992	Mm.277250	NM_011871	ENSMUSG00000002731	Prkra	AV120107|PRK|Pact|RAX|lear	protein kinase, interferon inducible double stranded RNA dependent activator	protein-coding
chrX	7070722	7072695	intron (NM_001042542, intron 2 of 5)	intron (NM_001042542, intron 2 of 5)	3498	NM_001042542	11643	Mm.1498	NM_009651	ENSMUSG00000050089	Akap4	AKAP-4|AKAP82|Fsc1|PRKA4|mAKAP82|p82	A kinase (PRKA) anchor protein 4	protein-coding
chr18	45023037	45024725	Intergenic	L1Md_T|LINE|L1	195216	NM_001163013	240255	Mm.244482	NM_001163013	ENSMUSG00000034653	Ythdc2	3010002F02Rik|BC037178|mYTHDC2	YTH domain containing 2	protein-coding
chr17	88820114	88820586	Intergenic	ORR1B2|LTR|ERVL-MaLR	-28336	NR_157357	16867	Mm.1644	NM_013582	ENSMUSG00000024107	Lhcgr	Gpcr19-rs1|LH-R|LH/CG-R|LSH-R|Lhr	luteinizing hormone/choriogonadotropin receptor	protein-coding
chr12	54710117	54711046	Intergenic	Intergenic	-14687	NM_025456	66266	Mm.156440	NM_025456	ENSMUSG00000054302	Eapp	1810011O16Rik	E2F-associated phosphoprotein	protein-coding
chr8	84066395	84067488	5' UTR (NM_009055, exon 1 of 21)	5' UTR (NM_009055, exon 1 of 21)	105	NM_009055	19724	Mm.7892	NM_009055	ENSMUSG00000031706	Rfx1	AI047719|AI385641	regulatory factor X, 1 (influences HLA class II expression)	protein-coding
chr10	128695820	128696634	promoter-TSS (NM_177411)	promoter-TSS (NM_177411)	41	NM_177411	19344	Mm.12815	NM_011229	ENSMUSG00000000711	Rab5b	C030027M18Rik	RAB5B, member RAS oncogene family	protein-coding
chrX	125870578	125871151	Intergenic	Intergenic	963140	NM_177705	237029	Mm.60998	NM_177705	ENSMUSG00000058670	4932411N23Rik	-	RIKEN cDNA 4932411N23 gene	protein-coding
chr11	3152042	3164690	intron (NM_030207, intron 10 of 32)	intron (NM_030207, intron 10 of 32)	34364	NR_003517	236604	Mm.247625	NM_001004146		Pisd-ps1	-	phosphatidylserine decarboxylase, pseudogene 1	pseudo
chr13	56522091	56522757	promoter-TSS (NM_001346732)	promoter-TSS (NM_001346732)	-48	NM_001346732	213311	Mm.233904	NM_178674	ENSMUSG00000035509	Fbxl21	D630045D17Rik|FBL3B|FBXL3B|Psttm	F-box and leucine-rich repeat protein 21	protein-coding
chr4	3938519	3939381	promoter-TSS (NR_104354)	promoter-TSS (NR_104354)	62	NM_001190323	66433	Mm.27406	NM_181391	ENSMUSG00000042198	Chchd7	1810049H20Rik	coiled-coil-helix-coiled-coil-helix domain containing 7	protein-coding
chr5	142781484	142782114	intron (NM_178242, intron 4 of 15)	ZP3AR|Satellite|Satellite	35863	NM_178242	231861	Mm.354649	NM_178242	ENSMUSG00000039477	Tnrc18	BC025631|EG381742|Zfp469	trinucleotide repeat containing 18	protein-coding
chr3	30030139	30031439	intron (NM_001361034, intron 2 of 16)	L1Md_T|LINE|L1	-17585	NM_007963	14013	Mm.56965	NM_007963	ENSMUSG00000027684	Mecom	D630039M04Rik|Evi-1|Evi1|Jbo|Mds|Mds1|Mds1-Evi1|Prdm3|Znfpr1b1	MDS1 and EVI1 complex locus	protein-coding
chr13	111725112	111726067	Intergenic	CpG	39411	NM_172593	218613	Mm.31012	NM_172593	ENSMUSG00000032727	Mier3	5730509D14|AU015422|D130064H19Rik	MIER family member 3	protein-coding
chr8	64445862	64447014	Intergenic	L1Md_T|LINE|L1	68003	NR_030491	735270		NR_030491	ENSMUSG00000076042	Mir710	Mirn710|mmu-mir-710	microRNA 710	ncRNA
chr7	66689366	66690297	promoter-TSS (NR_034030)	promoter-TSS (NR_034030)	-58	NM_001191001	72635	Mm.289796	NM_152815	ENSMUSG00000053091	Lins1	2700083B01Rik|AW547219|Lins|Lins2|Wins2	lines homolog 1	protein-coding
chr6	47813102	47813802	promoter-TSS (NM_009787)	promoter-TSS (NM_009787)	60	NM_009787	12304	Mm.2442	NM_009787	ENSMUSG00000025823	Pdia4	AI987846|Cai|ERp-72|Erp72	protein disulfide isomerase associated 4	protein-coding
chr7	19324737	19325289	Intergenic	ZP3AR|Satellite|Satellite	-14968	NM_001347586	14282	Mm.248335	NM_008036	ENSMUSG00000003545	Fosb	-	FBJ osteosarcoma oncogene B	protein-coding
chr7	128610791	128611764	promoter-TSS (NM_178641)	promoter-TSS (NM_178641)	-88	NM_178641	101490	Mm.490344	NM_178641	ENSMUSG00000042105	Inpp5f	5830435P03Rik|AI115354|AW561896|SAC2|cI-27|hSAC2|mKIAA0966	inositol polyphosphate-5-phosphatase F	protein-coding
chrX	169997635	169998608	Intergenic	CpG	-19204	NR_029457	654820	Mm.34441	NM_001039559	ENSMUSG00000072844	G530011O06Rik	-	RIKEN cDNA G530011O06 gene	ncRNA
chr13	119690007	119690967	5' UTR (NM_001291439, exon 1 of 10)	5' UTR (NM_001291439, exon 1 of 10)	136	NM_145942	208715	Mm.61526	NM_145942	ENSMUSG00000093930	Hmgcs1	B130032C06Rik	3-hydroxy-3-methylglutaryl-Coenzyme A synthase 1	protein-coding
chr17	56325512	56326090	promoter-TSS (NM_172132)	promoter-TSS (NM_172132)	-249	NM_172132	193796	Mm.45047	NM_172132	ENSMUSG00000024201	Kdm4b	4732474L06Rik|Jmjd2b	lysine (K)-specific demethylase 4B	protein-coding
chr5	135962488	135963155	intron (NM_001160366, intron 9 of 10)	CpG	11655	NM_001160366	109267	Mm.332750	NM_001160366	ENSMUSG00000029699	Ssc4d	C330016E03Rik|S4D-SRCRB|SRCRB-S4D|Srcrb4d	scavenger receptor cysteine rich family, 4 domains	protein-coding
chr7	83891748	83892469	5' UTR (NM_023403, exon 1 of 3)	5' UTR (NM_023403, exon 1 of 3)	108	NM_023403	67943	Mm.117365	NM_023403	ENSMUSG00000038503	Mesd	2210015O11Rik|AW537813|Mesdc2|mKIAA0081|mesd|msd	mesoderm development LRP chaperone	protein-coding
chr5	139149464	139150818	promoter-TSS (NM_001081265)	promoter-TSS (NM_001081265)	-94	NM_001081265	433956	Mm.5547	NM_001081265	ENSMUSG00000025857	Dnaaf5	BC053401|C76907|Heatr2	dynein, axonemal assembly factor 5	protein-coding
chr14	120439834	120440406	Intergenic	ORR1D1|LTR|ERVL-MaLR	-38341	NM_029519	76108	Mm.261448	NM_029519	ENSMUSG00000051615	Rap2a	5830461H18Rik	RAS related protein 2a	protein-coding
chr17	35164496	35165475	promoter-TSS (NM_020027)	promoter-TSS (NM_020027)	-108	NM_001199044	53761	Mm.272462	NM_020027	ENSMUSG00000024393	Prrc2a	3110039B05Rik|Bat-2|Bat2|D17H6S51E|G2|Wbp12|mKIAA4178	proline-rich coiled-coil 2A	protein-coding
chr4	139574284	139575159	promoter-TSS (NM_001205173)	promoter-TSS (NM_001205173)	1	NM_001205173	212632	Mm.30464	NM_183148	ENSMUSG00000041025	Iffo2	C79267	intermediate filament family orphan 2	protein-coding
chr5	97988763	97989784	intron (NM_133738, intron 7 of 16)	L1Md_T|LINE|L1	41744	NM_133738	71914	Mm.24842	NM_133738	ENSMUSG00000029338	Antxr2	2310046B19Rik|AW561899|CMG-2|CMG2|cI-35	anthrax toxin receptor 2	protein-coding
chr2	48948869	48950104	promoter-TSS (NM_011958)	promoter-TSS (NM_011958)	-22	NM_029924	109241	Mm.440436	NM_029924	ENSMUSG00000036792	Mbd5	9430004D19Rik|AA536666|AI426407|C030040A15Rik|Gm1630	methyl-CpG binding domain protein 5	protein-coding
chr6	56714609	56715523	5' UTR (NM_030235, exon 1 of 16)	5' UTR (NM_030235, exon 1 of 16)	161	NM_030235	78937	Mm.105343	NM_030235	ENSMUSG00000029787	Avl9	5830411G16Rik|D730049P16Rik|mKIAA0241	AVL9 cell migration associated	protein-coding
chr15	77841888	77842697	promoter-TSS (NM_022410)	promoter-TSS (NM_022410)	-117	NM_022410	17886	Mm.29677	NM_022410	ENSMUSG00000022443	Myh9	Fltn|Myhn-1|Myhn1|NMHCIIA|NMMHC-A|NMMHC-IIA|TU72.6	myosin, heavy polypeptide 9, non-muscle	protein-coding
chr10	80398876	80399949	5' UTR (NM_001306143, exon 1 of 7)	5' UTR (NM_001306143, exon 1 of 7)	119	NM_013595	17192	Mm.7142	NM_013595	ENSMUSG00000035478	Mbd3	AI181826|AU019209	methyl-CpG binding domain protein 3	protein-coding
chr5	110448372	110449076	promoter-TSS (NM_001317042)	promoter-TSS (NM_001317042)	-221	NM_001142642	381668	Mm.348782	NM_028596	ENSMUSG00000043323	Fbrsl1	2410025L10Rik|AI467568|Gm1049|Gm29766|mKIAA1545	fibrosin-like 1	protein-coding
chr14	79834637	79836209	Intergenic	L1Md_T|LINE|L1	33753	NR_033535	100038734	Mm.387484	NR_033535	ENSMUSG00000095959	Gm10845	-	predicted gene 10845	ncRNA
chr10	58230855	58232986	exon (NM_001081954, exon 1 of 1)	exon (NM_001081954, exon 1 of 1)	755	NM_001081954	664783	Mm.482575	NM_001081954		Dux	AW822073|Dux4|Duxbl|EG664783	double homeobox	protein-coding
chrX	97975144	97976596	Intergenic	L1Md_T|LINE|L1	-172887	NM_013476	11835	Mm.39005	NM_013476	ENSMUSG00000046532	Ar	AW320017|Tfm	androgen receptor	protein-coding
chr7	16614407	16615827	promoter-TSS (NM_172739)	promoter-TSS (NM_172739)	-124	NM_172739	232906	Mm.28646	NM_172739	ENSMUSG00000058230	Arhgap35	6430596G11Rik|AI841135|Grlf1|mKIAA1722|p190A|p190RhoGAP	Rho GTPase activating protein 35	protein-coding
chr15	36472175	36472576	Intergenic	Intergenic	24359	NM_001358006	68839	Mm.396537	NM_175134	ENSMUSG00000048307	Ankrd46	1110054N06Rik|AI314978|AI987733	ankyrin repeat domain 46	protein-coding
chr1	32172417	32173122	promoter-TSS (NM_133235)	promoter-TSS (NM_133235)	47	NM_133235	170771	Mm.336594	NM_133235	ENSMUSG00000026058	Khdrbs2	6330586C16Rik|Slim1|Slm-1|Slm1|TG-RP135|Tg(LRRK2*R1441G)135Cjli|mSLM-1	KH domain containing, RNA binding, signal transduction associated 2	protein-coding
chr4	56865034	56865526	promoter-TSS (NM_018761)	promoter-TSS (NM_018761)	-69	NM_018761	54366	Mm.218891	NM_018761	ENSMUSG00000038816	Ctnnal1	ACRP|AI616177|AW545119|C86009|Catnal1	catenin (cadherin associated protein), alpha-like 1	protein-coding
chr1	177983013	177984048	Intergenic	CpG	-7868	NM_001368822	545391	Mm.442974	NM_001034899	ENSMUSG00000091476	Catspere2	Gm16432|Gm30473	cation channel sperm associated auxiliary subunit epsilon 2	protein-coding
chr1	151754910	151755588	promoter-TSS (NM_001311165)	promoter-TSS (NM_001311165)	-125	NM_001311166	66967	Mm.337691	NM_001039644	ENSMUSG00000043019	Edem3	2310050N11Rik	ER degradation enhancer, mannosidase alpha-like 3	protein-coding
chr9	124422515	124425986	non-coding (NR_027950, exon 2 of 2)	non-coding (NR_027950, exon 2 of 2)	463	NR_015516	75135	Mm.476814	NR_015516		4930526I15Rik	1600027J15Rik	RIKEN cDNA 4930526I15 gene	ncRNA
chrY	90772031	90772944	Intergenic	CpG	-12955	NM_133362	170942	Mm.76062	NM_133362	ENSMUSG00000096768	Erdr1	edr	erythroid differentiation regulator 1	protein-coding
chr15	31175804	31176673	Intergenic	(CTCTG)n|Simple_repeat|Simple_repeat	-48147	NM_146057	223453	Mm.222867	NM_146057	ENSMUSG00000039168	Dap	4921531N22Rik|AI789753|AU040360	death-associated protein	protein-coding
chr11	61174291	61175486	5' UTR (NM_001004143, exon 1 of 13)	5' UTR (NM_001004143, exon 1 of 13)	171	NM_001004143	216825	Mm.30602	NM_001004143	ENSMUSG00000042506	Usp22	AI427806	ubiquitin specific peptidase 22	protein-coding
chr2	28602596	28603442	Intergenic	(CTGGGG)n|Simple_repeat|Simple_repeat	18963	NM_008114	14582	Mm.373385	NM_008114	ENSMUSG00000026815	Gfi1b	Gfi-1B	growth factor independent 1B	protein-coding
chr5	111643895	111644764	Intergenic	(GGCTG)n|Simple_repeat|Simple_repeat	62768	NR_015546	330164	Mm.193276	NM_177875	ENSMUSG00000052848	C130026L21Rik	-	RIKEN cDNA C130026L21 gene	ncRNA
chr7	63937183	63939895	exon (NM_021366, exon 1 of 2)	exon (NM_021366, exon 1 of 2)	376	NM_021366	50794	Mm.240473	NM_021366	ENSMUSG00000052040	Klf13	0610043C13Rik|9430029L20Rik|Bteb3|FKLF-2|FKLF2|NSLP1|RFLAT-1|RFLAT1	Kruppel-like factor 13	protein-coding
chr5	90541186	90542744	intron (NM_145146, intron 8 of 14)	L1Md_T|LINE|L1	-19244	NM_001252661	622307	Mm.389654	NM_001252661	ENSMUSG00000070690	Albfm1	5830473C10Rik|Arg|Gm17754	albumin superfamily member 1	protein-coding
chr5	36581668	36582496	intron (NM_001113362, intron 2 of 14)	CpG	315	NM_133910	100855	Mm.486203	NM_133910	ENSMUSG00000029192	Tbc1d14	2810413P16Rik|AU043625|C86258|D5Ertd110e|mKIAA1322	TBC1 domain family, member 14	protein-coding
chr4	151044440	151045067	promoter-TSS (NM_001289877)	promoter-TSS (NM_001289877)	-88	NM_001289878	18628	Mm.121361	NM_011067	ENSMUSG00000028957	Per3	2810049O06Rik|mPer3	period circadian clock 3	protein-coding
chr14	41502825	41503464	Intergenic	L1Md_A|LINE|L1	-70067	NM_001358038	666214		NM_001358038		1700049E17Rik1	1700049E17Rik	RIKEN cDNA 1700049E17 gene, gene 1	protein-coding
chr7	102209682	102210816	promoter-TSS (NM_001287166)	promoter-TSS (NM_001287166)	-83	NM_022979	269966	Mm.439800	NM_022979	ENSMUSG00000063550	Nup98	4732457F17|AI849286|Nup96	nucleoporin 98	protein-coding
chr17	72836068	72837400	promoter-TSS (NM_001357368)	promoter-TSS (NM_001357368)	106	NM_027166	383295	Mm.277533	NM_027166	ENSMUSG00000039770	Ypel5	2310076K21Rik|CGI-127	yippee like 5	protein-coding
chr18	36274664	36275291	Intergenic	Intergenic	-6128	NM_008989	19290	Mm.44643	NM_008989	ENSMUSG00000043991	Pura	6330411E07Rik|CAGER-1|Pur-alpha|ssCRE-BP	purine rich element binding protein A	protein-coding
chr8	15519787	15520088	Intergenic	LSU-rRNA_Hsa|rRNA|rRNA	462284	NM_008664	17930	Mm.272115	NM_008664	ENSMUSG00000031461	Myom2	AW146149	myomesin 2	protein-coding
chr17	46950263	46951651	intron (NM_146078, intron 33 of 46)	intron (NM_146078, intron 33 of 46)	40479	NM_008938	19133	Mm.291370	NM_008938	ENSMUSG00000023978	Prph2	AOFMD|AVMD|Nmf193|PRPH|RP7|Rd-2|Rd2|Rds|Tspan22|rds	peripherin 2	protein-coding
chrX	73306114	73307683	Intergenic	L1Md_T|LINE|L1	-16383	NM_031493	27084	Mm.255790	NM_031493	ENSMUSG00000067764	Xlr5c	Xlr5	X-linked lymphocyte-regulated 5C	protein-coding
chr12	108178760	108180208	promoter-TSS (NM_028262)	promoter-TSS (NM_028262)	-200	NM_028262	52690	Mm.159185	NM_028262	ENSMUSG00000056770	Setd3	2610102I01Rik|2610305M23Rik|6030490B17Rik|D12Ertd771e	SET domain containing 3	protein-coding
chr1	85494788	85495403	Intergenic	Intergenic	103715	NM_030194	109032	Mm.335802	NM_030194	ENSMUSG00000070034	Sp110	5031415C07Rik|52kDa|5830484A20Rik|Ifi75|Ipr1	Sp110 nuclear body protein	protein-coding
chr9	24147394	24149018	intron (NM_175678, intron 3 of 9)	L1Md_T|LINE|L1	50188	NM_175678	319239	Mm.130824	NM_175678	ENSMUSG00000043659	Npsr1	9330128H10Rik|GPRA|Gpr154|MVTR|PGR14|VRR1	neuropeptide S receptor 1	protein-coding
chr1	100180109	100180400	intron (NM_172851, intron 10 of 23)	L1Md_F2|LINE|L1	407853	NM_172851	241175	Mm.251301	NM_172851	ENSMUSG00000067028	Cntnap5b	C230078M14Rik|Caspr5-2	contactin associated protein-like 5B	protein-coding
chr16	89963278	89964489	intron (NM_001145886, intron 1 of 27)	intron (NM_001145886, intron 1 of 27)	-3056	NM_009384	21844	Mm.310902	NM_009384	ENSMUSG00000002489	Tiam1	AI847750|D16Ium10|D16Ium10e	T cell lymphoma invasion and metastasis 1	protein-coding
chr10	39369439	39370264	promoter-TSS (NM_001122892)	promoter-TSS (NM_001122892)	52	NM_001122892	14360	Mm.4848	NM_008054	ENSMUSG00000019843	Fyn	AI448320|AW552119	Fyn proto-oncogene	protein-coding
chr9	124438830	124440887	Intergenic	Intergenic	16071	NR_015516	75135	Mm.476814	NR_015516		4930526I15Rik	1600027J15Rik	RIKEN cDNA 4930526I15 gene	ncRNA
chr9	40800427	40801822	promoter-TSS (NM_031165)	promoter-TSS (NM_031165)	-152	NM_001364480	15481	Mm.290774	NM_031165	ENSMUSG00000015656	Hspa8	2410008N15Rik|Hsc70|Hsc71|Hsc73|Hsp73|Hspa10	heat shock protein 8	protein-coding
chr14	14345309	14352053	intron (NM_008369, intron 3 of 11)	intron (NM_008369, intron 3 of 11)	2186	NM_008369	16188	Mm.425857	NM_008369	ENSMUSG00000068758	Il3ra	CD123|CDw123|SUT-1	interleukin 3 receptor, alpha chain	protein-coding
chr1	137323289	137324158	Intergenic	(CTGGGG)n|Simple_repeat|Simple_repeat	-363275	NM_030676	26424	Mm.16794	NM_030676	ENSMUSG00000026398	Nr5a2	AU020803|D1Ertd308e|Ftf|LRH-1|UF2-H3B	nuclear receptor subfamily 5, group A, member 2	protein-coding
chr2	167349182	167349896	promoter-TSS (NM_019835)	promoter-TSS (NM_019835)	-361	NM_019835	56336	Mm.200886	NM_019835	ENSMUSG00000017929	B4galt5	9430078I07Rik|AW049941|AW539721	UDP-Gal:betaGlcNAc beta 1,4-galactosyltransferase, polypeptide 5	protein-coding
chr2	8189350	8190580	Intergenic	L1Md_T|LINE|L1	-793767	NM_001110231	14007	Mm.398543	NM_010160	ENSMUSG00000002107	Celf2	B230218O03|B230345P09Rik|C88023|CELF-2|CUG-BP2|Cugbp2|D230046B21Rik|Etr-3|Napor|Napor-2|mETR-3	CUGBP, Elav-like family member 2	protein-coding
chr13	13954069	13955006	promoter-TSS (NR_155555)	promoter-TSS (NR_155555)	-137	NM_001362404	97884	Mm.21686	NM_178640	ENSMUSG00000039242	B3galnt2	A930105D20Rik|C80633|D230016N13Rik	UDP-GalNAc:betaGlcNAc beta 1,3-galactosaminyltransferase, polypeptide 2	protein-coding
chr7	29003776	29004582	TTS (NM_008279)	TTS (NM_008279)	21325	NM_008279	26411	Mm.148278	NM_008279	ENSMUSG00000037337	Map4k1	Hpk1|mHPK1	mitogen-activated protein kinase kinase kinase kinase 1	protein-coding
chrX	134371570	134371953	Intergenic	Intergenic	-33019	NM_010078	13497	Mm.121662	NM_010078	ENSMUSG00000000223	Drp2	AW495265|DRP-2	dystrophin related protein 2	protein-coding
chr4	40142697	40143916	promoter-TSS (NM_007386)	promoter-TSS (NM_007386)	41	NM_007386	11428	Mm.331547	NM_007386	ENSMUSG00000028405	Aco1	Aco-1|Irebp|Irp1	aconitase 1	protein-coding
chr4	95966832	95967593	promoter-TSS (NR_045777)	promoter-TSS (NR_045777)	-167	NM_030014	77963	Mm.49994	NM_030014	ENSMUSG00000028572	Hook1	A930033L17Rik|azh	hook microtubule tethering protein 1	protein-coding
chr5	118244862	118245653	promoter-TSS (NM_001109902)	promoter-TSS (NM_001109902)	30	NM_001081236	76792	Mm.103428	NM_001081236	ENSMUSG00000032840	2410131K14Rik	-	RIKEN cDNA 2410131K14 gene	protein-coding
chr11	55469100	55470184	promoter-TSS (NM_013716)	promoter-TSS (NM_013716)	-110	NM_013716	27041	Mm.39631	NM_013716	ENSMUSG00000018583	G3bp1	AI849976|B430204O07|C87777|G3bp|mKIAA4115	GTPase activating protein (SH3 domain) binding protein 1	protein-coding
chr8	70212080	70212940	promoter-TSS (NM_001007570)	promoter-TSS (NM_001007570)	-229	NM_001007570	73095	Mm.185413	NM_001007570	ENSMUSG00000002346	Slc25a42	2900084M01Rik	solute carrier family 25, member 42	protein-coding
chr18	65430388	65431529	promoter-TSS (NM_172833)	promoter-TSS (NM_172833)	-32	NM_001365019	240354	Mm.132613	NM_172833	ENSMUSG00000032688	Malt1	A630046N12|D430033E09Rik|Pcasp1	MALT1 paracaspase	protein-coding
chr12	20990020	20991419	Intergenic	CpG	-121037	NM_001135192	211914	Mm.358946	NM_001004364	ENSMUSG00000052632	Asap2	6530401G17Rik|Ddef2|Gm1523|Gm592|PAG3|PAP	ArfGAP with SH3 domain, ankyrin repeat and PH domain 2	protein-coding
chr12	91942313	91943659	Intergenic	L1Md_T|LINE|L1	-93829	NM_001039089	20338	Mm.250605	NM_011344	ENSMUSG00000020964	Sel1l	AW493766|Sel1h|mKIAA4137	sel-1 suppressor of lin-12-like (C. elegans)	protein-coding
chr6	145210743	145211405	promoter-TSS (NM_001163628)	promoter-TSS (NM_001163628)	-60	NM_001163628	67636	Mm.486359	NM_133688	ENSMUSG00000040370	Etfrf1	4930469P12Rik|AL022899|Ghiso|Lyrm5	electron transfer flavoprotein regulatory factor 1	protein-coding
chr13	3372771	3373665	Intergenic	Intergenic	-105085	NR_015522	76937	Mm.487240	NR_015522	ENSMUSG00000097709	2810429I04Rik	AI256682	RIKEN cDNA 2810429I04 gene	ncRNA
chr12	19387283	19388824	Intergenic	CpG	873543	NM_001201330	236366	Mm.352227	NM_001033157	ENSMUSG00000073197	5730507C01Rik	-	RIKEN cDNA 5730507C01 gene	protein-coding
chr13	66588723	66589597	Intergenic	Intergenic	-148042	NM_183119	76803	Mm.183391	NM_183119	ENSMUSG00000074832	2410141K09Rik	4930482J15Rik|Ayu21-35|Gt(pU21)35Imeg	RIKEN cDNA 2410141K09 gene	protein-coding
chr1	86358442	86359898	promoter-TSS (NR_015507)	promoter-TSS (NR_015507)	285	NM_010880	17975	Mm.154378	NM_010880	ENSMUSG00000026234	Ncl	B530004O11Rik|C23|D0Nds28|D1Nds28|Nucl	nucleolin	protein-coding
chr12	111537495	111538874	promoter-TSS (NM_178041)	promoter-TSS (NM_178041)	83	NM_178041	217869	Mm.271222	NM_173363	ENSMUSG00000021282	Eif5	2810011H21Rik|D12Ertd549e	eukaryotic translation initiation factor 5	protein-coding
chr11	53891490	53892096	promoter-TSS (NM_011396)	promoter-TSS (NM_011396)	-90	NM_011396	20520	Mm.42253	NM_011396	ENSMUSG00000018900	Slc22a5	Lstpl|Octn2|jvs	solute carrier family 22 (organic cation transporter), member 5	protein-coding
chr5	24685378	24686299	promoter-TSS (NM_016736)	promoter-TSS (NM_016736)	23	NM_016736	53312	Mm.5856	NM_016736	ENSMUSG00000028954	Nub1	4931404D21Rik|6330412F12Rik|BS4|NY-REN-18	negative regulator of ubiquitin-like proteins 1	protein-coding
chr14	62760941	62761746	promoter-TSS (NM_008715)	promoter-TSS (NM_008715)	-231	NM_008715	18130	Mm.319684	NM_008715	ENSMUSG00000035161	Ints6	2900075H24Rik|AI480962|DICE1|Ddx26|HDB|Notch2l	integrator complex subunit 6	protein-coding
chr10	80701728	80702736	promoter-TSS (NM_027829)	promoter-TSS (NM_027829)	-412	NM_172457	208228	Mm.49309	NM_172457	ENSMUSG00000003348	Mob3a	5330417K06Rik|A630029F06|AV218468|Mobkl2a	MOB kinase activator 3A	protein-coding
chr12	112644375	112645371	promoter-TSS (NM_013929)	promoter-TSS (NM_013929)	45	NM_013929	30954	Mm.289812	NM_013929	ENSMUSG00000064326	Siva1	CD27bp|Siva	SIVA1, apoptosis-inducing factor	protein-coding
chr19	61224801	61229125	intron (NM_009970, intron 3 of 11)	CpG-7695	1455	NM_009970	12982	Mm.287228	NM_009970	ENSMUSG00000059326	Csf2ra	CD116|Csfgmra|GM-CSF-Ra|GM-CSFR	colony stimulating factor 2 receptor, alpha, low-affinity (granulocyte-macrophage)	protein-coding
chr7	19715106	19716093	promoter-TSS (NM_016871)	promoter-TSS (NM_016871)	-170	NM_016871	53333	Mm.61682	NM_016871	ENSMUSG00000002984	Tomm40	AW539759|Mom35|Tom40	translocase of outer mitochondrial membrane 40	protein-coding
chr2	151669973	151671118	Intergenic	Intergenic	-2012	NM_001276400	668929	Mm.473683	NM_001114677	ENSMUSG00000074704	Rad21l	Gm14160|MeiRAD21L|Rad21l1	RAD21-like (S. pombe)	protein-coding
chr8	82718916	82720012	Intergenic	L1Md_T|LINE|L1	54681	NM_145600	30932	Mm.269248	NM_145600	ENSMUSG00000031711	Zfp330	BC008086|Noa36|Znf330	zinc finger protein 330	protein-coding
chr1	175692092	175693153	promoter-TSS (NM_010098)	promoter-TSS (NM_010098)	10	NM_010098	13603	Mm.32744	NM_010098	ENSMUSG00000026525	Opn3	ERO|Ecpn	opsin 3	protein-coding
chr12	84450632	84451716	promoter-TSS (NM_134042)	promoter-TSS (NM_134042)	-150	NM_134042	104776	Mm.247510	NM_134042	ENSMUSG00000021238	Aldh6a1	1110038I05Rik|Mmsdh	aldehyde dehydrogenase family 6, subfamily A1	protein-coding
chr13	26440662	26442074	Intergenic	L1Md_T|LINE|L1	-128962	NR_045933	73576	Mm.45473	NR_045933	ENSMUSG00000084811	1700092E19Rik	-	RIKEN cDNA 1700092E19 gene	ncRNA
chr12	85454876	85455810	Intergenic	CpG	-18547	NM_010234	14281	Mm.246513	NM_010234	ENSMUSG00000021250	Fos	D12Rfj1|c-fos|cFos	FBJ osteosarcoma oncogene	protein-coding
chr7	38084665	38085893	Intergenic	CpG	22211	NM_007633	12447	Mm.16110	NM_007633	ENSMUSG00000002068	Ccne1	AW538188|CycE1	cyclin E1	protein-coding
chr9	35885919	35887297	Intergenic	L1Md_T|LINE|L1	-36728	NR_030730	100041605	Mm.99350	NR_030730	ENSMUSG00000098705	Gm3428	-	predicted gene 3428	ncRNA
chr9	26406399	26408312	Intergenic	L1Md_T|LINE|L1	-326453	NM_001310766	76898	Mm.218788	NM_029792	ENSMUSG00000045994	B3gat1	0710007K08Rik|AI846286|GlcAT-P|Glcatp|Hnk1	beta-1,3-glucuronyltransferase 1 (glucuronosyltransferase P)	protein-coding
chr10	80226248	80226862	promoter-TSS (NM_023431)	promoter-TSS (NM_023431)	-43	NM_023431	68114	Mm.273418	NM_023431	ENSMUSG00000020156	Pwwp3a	2610019J09|9430059D04Rik|Mum1|UBE-1C2	PWWP domain containing 3A, DNA repair factor	protein-coding
chr17	17623872	17625527	promoter-TSS (NM_172827)	promoter-TSS (NM_172827)	-210	NM_172827	240028	Mm.328807	NM_172827	ENSMUSG00000023845	Lnpep	2010309L07Rik|4732490P18Rik|CAP|IRAP|PLAP|gp160|vp165	leucyl/cystinyl aminopeptidase	protein-coding
chr5	135754162	135754782	intron (NM_001289554, intron 7 of 8)	ZP3AR|Satellite|Satellite	-10300	NM_172541	215210	Mm.11688	NM_172541	ENSMUSG00000039886	Tmem120a	2010310D06Rik|Tmpit	transmembrane protein 120A	protein-coding
chr19	14597996	14598792	promoter-TSS (NM_011600)	promoter-TSS (NM_011600)	-211	NM_001302950	21888	Mm.103638	NM_011600	ENSMUSG00000024642	Tle4	5730411M05Rik|AA792082|Bce-1|Bce1|ESTM13|ESTM14|Grg4|X83332|X83333|grg-4	transducin-like enhancer of split 4	protein-coding
chr4	11190346	11192053	promoter-TSS (NM_001282943)	promoter-TSS (NM_001282943)	-152	NM_001037134	12448	Mm.35867	NM_009830	ENSMUSG00000028212	Ccne2	-	cyclin E2	protein-coding
chr6	89643907	89644914	intron (NM_001178058, intron 1 of 15)	CpG	422	NM_001178059	232223	Mm.229332	NM_153162	ENSMUSG00000000811	Txnrd3	AI196535|TGR|TR2	thioredoxin reductase 3	protein-coding
chr5	137628441	137629283	promoter-TSS (NM_001168652)	promoter-TSS (NM_001168652)	-261	NM_001168652	231798	Mm.200763	NM_146164	ENSMUSG00000093445	Lrch4	2810008P14Rik|2900069C24Rik|AI558103|LRN|LRRN4|SAP25|mFLJ00248	leucine-rich repeats and calponin homology (CH) domain containing 4	protein-coding
chr5	15038892	15040401	Intergenic	Lx2A1|LINE|L1	-6639	NM_182957	66773	Mm.368256	NM_182957	ENSMUSG00000091897	Gm17019	-	predicted gene 17019	protein-coding
chr8	11635036	11636663	promoter-TSS (NM_001167967)	promoter-TSS (NM_001167967)	-92	NM_001167967	102334	Mm.12459	NM_133971	ENSMUSG00000031508	Ankrd10	4833425P12Rik|AW549277	ankyrin repeat domain 10	protein-coding
chrX	85776225	85777155	5' UTR (NM_001294140, exon 1 of 21)	5' UTR (NM_001294140, exon 1 of 21)	129	NM_008194	14933	Mm.246682	NM_008194	ENSMUSG00000025059	Gk	D930012N15Rik|Gyk	glycerol kinase	protein-coding
chr7	16285516	16286853	intron (NM_001136471, intron 1 of 13)	intron (NM_001136471, intron 1 of 13)	611	NM_001136471	243846	Mm.482401	NM_172297	ENSMUSG00000041375	Ccdc9	2600011L02Rik	coiled-coil domain containing 9	protein-coding
chr2	177329515	177330155	Intergenic	Intergenic	-134907	NM_001177568	628308	Mm.460436	NM_001177568	ENSMUSG00000078866	Zfp970	Gm14420	zinc finger protein 970	protein-coding
chr17	48409225	48410434	promoter-TSS (NM_001357904)	promoter-TSS (NM_001357904)	-9	NM_001110832	18044	Mm.4929	NM_010913	ENSMUSG00000023994	Nfya	AA407810|Cbf-b|SEZ-10|SEZ10	nuclear transcription factor-Y alpha	protein-coding
chr6	83831434	83832088	promoter-TSS (NM_146169)	promoter-TSS (NM_146169)	-20	NM_146169	232164	Mm.404420	NM_146169	ENSMUSG00000045896	Paip2b	-	poly(A) binding protein interacting protein 2B	protein-coding
chr9	66834466	66835332	promoter-TSS (NM_026674)	promoter-TSS (NM_026674)	-193	NM_026674	68318	Mm.284229	NM_026674	ENSMUSG00000053040	Aph1c	0610008A10Rik|APH-1b|Aph1b	aph1 homolog C, gamma secretase subunit	protein-coding
chr10	62650859	62651695	promoter-TSS (NM_001358819)	promoter-TSS (NM_001358819)	-59	NM_053183	94213	Mm.114116	NM_053183	ENSMUSG00000020076	Ddx50	4933429B04Rik|8430408E17Rik|GU2|RH-II	DEAD (Asp-Glu-Ala-Asp) box polypeptide 50	protein-coding
chr5	112276239	112276953	promoter-TSS (NM_009419)	promoter-TSS (NM_009419)	-149	NM_009419	22022	Mm.250631	NM_009419	ENSMUSG00000029344	Tpst2	AI448750|D5Ucla3|Tango13b|grm|grt	protein-tyrosine sulfotransferase 2	protein-coding
chr5	34187119	34188313	promoter-TSS (NM_010753)	promoter-TSS (NM_010753)	-6	NM_010753	17122	Mm.259260	NM_010753	ENSMUSG00000037235	Mxd4	2810410A03Rik|Mad4|bHLHc12	Max dimerization protein 4	protein-coding
chr12	72535971	72536460	promoter-TSS (NM_026327)	promoter-TSS (NM_026327)	-142	NM_026327	67708	Mm.11233	NM_026327	ENSMUSG00000034501	Pcnx4	1810048J11Rik|4932413O10|AU017192|Pcnxl4	pecanex homolog 4	protein-coding
chr3	95624372	95625461	promoter-TSS (NM_019561)	promoter-TSS (NM_019561)	-64	NM_019561	56205	Mm.241365	NM_019561	ENSMUSG00000038619	Ensa	1700020C18Rik|2610007F17Rik|AI451924	endosulfine alpha	protein-coding
chr4	151861566	151862791	promoter-TSS (NM_001195565)	promoter-TSS (NM_001195565)	-410	NM_001081557	100072	Mm.318846	NM_001081557	ENSMUSG00000014592	Camta1	1810059M14Rik|2310058O09Rik|AI316882|AW987475|mKIAA0833	calmodulin binding transcription activator 1	protein-coding
chr2	94157584	94158388	promoter-TSS (NM_019657)	promoter-TSS (NM_019657)	-77	NM_019657	56348	Mm.22505	NM_019657	ENSMUSG00000027195	Hsd17b12	2610510O05Rik|AI172963|KIK-I|Kik1	hydroxysteroid (17-beta) dehydrogenase 12	protein-coding
chr1	85109456	85110080	promoter-TSS (NM_213615)	promoter-TSS (NM_213615)	85	NM_213615	381287	Mm.487565	NM_213615	ENSMUSG00000089844	A530032D15Rik	Gm1888	RIKEN cDNA A530032D15Rik gene	protein-coding
chrX	80965299	80966790	Intergenic	L1Md_T|LINE|L1	-104600	NM_138751	192216	Mm.490421	NM_138751	ENSMUSG00000025666	Tmem47	3010015F07Rik|AI115536|BCMP1|Tm4sf10	transmembrane protein 47	protein-coding
chr7	25267375	25268467	intron (NM_001302811, intron 1 of 20)	intron (NM_001302811, intron 1 of 20)	222	NM_001302811	71722	Mm.28833	NM_027882	ENSMUSG00000005442	Cic	1200010B10Rik|mKIAA0306	capicua transcriptional repressor	protein-coding
chr8	113126079	113126509	Intergenic	ZP3AR|Satellite|Satellite	59032	NR_033584	791378	Mm.350576	NR_033584	ENSMUSG00000110541	Gm10280	-	predicted gene 10280	ncRNA
chr16	5351885	5352609	Intergenic	MTEa|LTR|ERVL-MaLR	-96291	NM_027446	70511	Mm.45780	NM_027446	ENSMUSG00000022544	Eef2kmt	5730409G15Rik|Fam86|Fam86a|eEF2-KMT	eukaryotic elongation factor 2 lysine methyltransferase	protein-coding
chr9	64671598	64672136	intron (NM_172522, intron 9 of 22)	C-rich|Low_complexity|Low_complexity	65889	NM_017382	53869	Mm.1387	NM_017382	ENSMUSG00000004771	Rab11a	-	RAB11A, member RAS oncogene family	protein-coding
chr1	119836840	119837904	promoter-TSS (NM_019933)	promoter-TSS (NM_019933)	-301	NM_019933	19258	Mm.458796	NM_019933	ENSMUSG00000026384	Ptpn4	PTPMEG|Ptn4|TEP|TEP/mPTPMEG|hPTP-MEG	protein tyrosine phosphatase, non-receptor type 4	protein-coding
chr4	145774238	145775221	Intergenic	Intergenic	-6814	NM_001083918	666532	Mm.392861	NM_001083918	ENSMUSG00000067916	Zfp991	Gm13139	zinc finger protein 991	protein-coding
chr1	105663341	105664406	promoter-TSS (NM_029349)	promoter-TSS (NM_029349)	12	NM_029349	227446	Mm.337339	NM_029349	ENSMUSG00000026319	Relch	2310035C23Rik|6430401N10|Kiaa1468|mKIAA1468	RAB11 binding and LisH domain, coiled-coil and HEAT repeat containing	protein-coding
chr18	11288597	11288834	Intergenic	(CCCA)n|Simple_repeat|Simple_repeat	-236148	NR_105022	68434	Mm.57626	NR_105022	ENSMUSG00000097222	1010001N08Rik	Gata6as	RIKEN cDNA 1010001N08 gene	ncRNA
chr9	36767259	36768060	promoter-TSS (NM_008408)	promoter-TSS (NM_008408)	-37	NM_008408	16430	Mm.2863	NM_008408	ENSMUSG00000032116	Stt3a	AA408947|B5|BB081708|Itm1	STT3, subunit of the oligosaccharyltransferase complex, homolog A (S. cerevisiae)	protein-coding
chr16	58727694	58728339	non-coding (NR_045518, exon 1 of 4)	non-coding (NR_045518, exon 1 of 4)	106	NM_001356488	224250	Mm.29482	NM_171826	ENSMUSG00000022744	Cldnd1	1110019C08Rik|AA407103|AI849195|AW489850|Cldn25	claudin domain containing 1	protein-coding
chr10	41518837	41519855	promoter-TSS (NM_016898)	promoter-TSS (NM_016898)	-154	NM_016898	53599	Mm.269815	NM_016898	ENSMUSG00000019818	Cd164	A115|A24|AA589639|AW540279|MGC-24|MSSP	CD164 antigen	protein-coding
chr7	128460750	128462175	promoter-TSS (NM_009383)	promoter-TSS (NM_009383)	51	NM_009383	21843	Mm.242072	NM_009383	ENSMUSG00000030846	Tial1	5330433G13Rik|AL033329|TIAR|mTIAR	Tia1 cytotoxic granule-associated RNA binding protein-like 1	protein-coding
chr17	69323715	69325227	Intergenic	L1Md_T|LINE|L1	-47265	NR_045428	69750	Mm.439063	NR_045428	ENSMUSG00000100572	2410021H03Rik	-	RIKEN cDNA 2410021H03 gene	ncRNA
chr10	81320288	81321263	promoter-TSS (NM_027381)	promoter-TSS (NM_027381)	-328	NM_027381	70312	Mm.87628	NM_027381	ENSMUSG00000034889	Cactin	2510012J08Rik	cactin, spliceosome C complex subunit	protein-coding
chr5	86172362	86173043	promoter-TSS (NM_172712)	promoter-TSS (NM_172712)	41	NM_172712	231380	Mm.34012	NM_172712	ENSMUSG00000035898	Uba6	4930542H01|5730469D23Rik|AU021846|AW124799|E1-L2|Ube1l2	ubiquitin-like modifier activating enzyme 6	protein-coding
chr7	28361245	28361899	intron (NM_001290542, intron 18 of 18)	ZP3AR|Satellite|Satellite	10032	NR_028129	100302567		NR_028129		AF357399	MBI-142	snoRNA AF357399	snoRNA
chr4	134081660	134082324	exon (NM_001162970, exon 12 of 20)	exon (NM_001162970, exon 12 of 20)	13081	NM_013706	23833	Mm.24130	NM_013706	ENSMUSG00000000682	Cd52	AI463198|B7|B7-Ag|CAMPATH-1|CLS1|MB7	CD52 antigen	protein-coding
chr14	20929026	20929430	promoter-TSS (NM_009502)	promoter-TSS (NM_009502)	-170	NM_009502	22330	Mm.279361	NM_009502	ENSMUSG00000021823	Vcl	9430097D22|AA571387|AI462105|AW545629	vinculin	protein-coding
chr8	106337710	106338422	promoter-TSS (NM_021491)	promoter-TSS (NM_021491)	-101	NM_021491	58994	Mm.23298	NM_021491	ENSMUSG00000031906	Smpd3	4631433G07Rik|AI427456|AW537966|fro|nSMase2	sphingomyelin phosphodiesterase 3, neutral	protein-coding
chr4	149426134	149426937	promoter-TSS (NM_022022)	promoter-TSS (NM_022022)	96	NM_022022	63958	Mm.415260	NM_022022	ENSMUSG00000028960	Ube4b	4930551I19Rik|4933406G05Rik|AU014668|D4Bwg0973e|UFD2|UFD2a|Ufd2p|mKIAA0684	ubiquitination factor E4B	protein-coding
chr8	105860231	105860846	promoter-TSS (NM_026532)	promoter-TSS (NM_026532)	5	NM_026532	68051	Mm.455474	NM_026532	ENSMUSG00000008450	Nutf2	2700067I02Rik|AI115459|AI413596|AW546000|Ntf2|Ntf3|PP15	nuclear transport factor 2	protein-coding
chr15	80983894	80984457	intron (NM_001357669, intron 1 of 20)	CT-rich|Low_complexity|Low_complexity	6410	NM_001357669	105835	Mm.274943	NM_134091	ENSMUSG00000042303	Sgsm3	1810012I01Rik|AI428557|BB175482|Cip85|R75178|RUSC3|Rutbc3	small G protein signaling modulator 3	protein-coding
chr17	87107112	87107991	promoter-TSS (NM_019654)	promoter-TSS (NM_019654)	-128	NM_019654	56468	Mm.126885	NM_019654	ENSMUSG00000037104	Socs5	1810018L08Rik|Cish5|mKIAA0671	suppressor of cytokine signaling 5	protein-coding
chr2	26932955	26934184	promoter-TSS (NM_011512)	promoter-TSS (NM_011512)	-58	NM_011512	20932	Mm.300594	NM_011512	ENSMUSG00000014867	Surf4	AL033340|AL033373|Surf-4	surfeit gene 4	protein-coding
chr6	67036511	67037703	exon (NM_007836, exon 2 of 4)	exon (NM_007836, exon 2 of 4)	300	NM_007836	13197	Mm.72235	NM_007836	ENSMUSG00000036390	Gadd45a	AA545191|Ddit1|GADD45	growth arrest and DNA-damage-inducible 45 alpha	protein-coding
chr14	13640260	13641677	Intergenic	L1_Mus2|LINE|L1	-29908	NM_177624	218739	Mm.39919	NM_177624	ENSMUSG00000044772	Sntn	A430083B19Rik	sentan, cilia apical structure protein	protein-coding
chr9	109931196	109932169	promoter-TSS (NM_008633)	promoter-TSS (NM_008633)	-92	NM_008633	17758	Mm.217318	NM_008633	ENSMUSG00000032479	Map4	AA407148|MAP-4|Mtap-4|Mtap4	microtubule-associated protein 4	protein-coding
chrX	147789454	147789700	Intergenic	Intergenic	-203416	NM_001198988	666184	Mm.422381	NM_001198988	ENSMUSG00000072931	Gm15080	Ott-like	predicted gene 15080	protein-coding
chr9	3258611	3258917	Intergenic	LSU-rRNA_Hsa|rRNA|rRNA	-58951	NR_027988	114673	Mm.422774	NM_053265	ENSMUSG00000042360	4930433N12Rik	-	RIKEN cDNA 4930433N12 gene	ncRNA
chr8	69716457	69717227	promoter-TSS (NM_001359086)	promoter-TSS (NM_001359086)	60	NM_001039967	66869	Mm.334581	NM_181274	ENSMUSG00000054648	Zfp869	1200003I07Rik	zinc finger protein 869	protein-coding
chr11	62076659	62077290	promoter-TSS (NM_001029936)	promoter-TSS (NM_001029936)	-50	NM_001029936	432572	Mm.438022	NM_001029936	ENSMUSG00000042331	Specc1	2810012G08Rik|B230396K10Rik|Cytsb	sperm antigen with calponin homology and coiled-coil domains 1	protein-coding
chr12	30578579	30579052	Intergenic	Intergenic	-5628	NM_172049	211986	Mm.34035	NM_172049	ENSMUSG00000043061	Tmem18	BC024093	transmembrane protein 18	protein-coding
chr12	31949294	31950871	intron (NM_177993, intron 1 of 8)	CpG	163	NM_153198	73389	Mm.390461	NM_153198	ENSMUSG00000002996	Hbp1	1700058O05Rik|BE629963|C330012F01Rik|C86454	high mobility group box transcription factor 1	protein-coding
chr7	38183208	38184345	promoter-TSS (NM_028166)	promoter-TSS (NM_028166)	-11	NM_028166	72244	Mm.187554	NM_028166		1600014C10Rik	AI428873	RIKEN cDNA 1600014C10 gene	protein-coding
chr2	26444952	26446100	promoter-TSS (NM_153125)	promoter-TSS (NM_153125)	-310	NM_153125	227648	Mm.206371	NM_153125	ENSMUSG00000026924	Sec16a	AU024582|C230052J16Rik|p250	SEC16 homolog A, endoplasmic reticulum export factor	protein-coding
chr1	85269610	85270895	5' UTR (NM_175219, exon 1 of 8)	5' UTR (NM_175219, exon 1 of 8)	314	NM_001037909	620078	Mm.386456	NM_175219	ENSMUSG00000052477	C130026I21Rik	4930565N07Rik	RIKEN cDNA C130026I21 gene	protein-coding
chrY	6011065	6011466	Intergenic	(GA)n|Simple_repeat|Simple_repeat	1156512	NM_001101623	100040160	Mm.482062	NM_001101623	ENSMUSG00000094081	Gm20826	-	predicted gene, 20826	protein-coding
chrX	69936933	69938457	intron (NR_033213, intron 8 of 8)	L1Md_T|LINE|L1	-7586	NM_029316	75509	Mm.233475	NM_029316	ENSMUSG00000059690	1700020N15Rik	-	RIKEN cDNA 1700020N15 gene	protein-coding
chrX	170001273	170008043	Intergenic	Intergenic	-25741	NR_029457	654820	Mm.34441	NM_001039559	ENSMUSG00000072844	G530011O06Rik	-	RIKEN cDNA G530011O06 gene	ncRNA
chr15	37960507	37961585	promoter-TSS (NM_199476)	promoter-TSS (NM_199476)	9	NM_199476	382985	Mm.24738	NM_199476	ENSMUSG00000022292	Rrm2b	p53R2	ribonucleotide reductase M2 B (TP53 inducible)	protein-coding
chr1	52844761	52845069	promoter-TSS (NM_146108)	promoter-TSS (NM_146108)	-123	NM_146108	227095	Mm.222063	NM_146108	ENSMUSG00000041426	Hibch	2610509I15Rik|HIBYL-COA-H	3-hydroxyisobutyryl-Coenzyme A hydrolase	protein-coding
chr7	141123006	141123717	Intergenic	Intergenic	-5555	NM_178381	71345	Mm.235813	NM_178381	ENSMUSG00000054662	Ano9	5430425C04Rik|Tmem16j|Tp53i5|Trp53i5	anoctamin 9	protein-coding
chr7	68748938	68749621	promoter-TSS (NM_025549)	promoter-TSS (NM_025549)	-41	NM_001042592	66412	Mm.251199	NM_025549	ENSMUSG00000042659	Arrdc4	2410003C09Rik|AV216361	arrestin domain containing 4	protein-coding
chr19	46761025	46761907	promoter-TSS (NM_001102471)	promoter-TSS (NM_001102471)	-143	NM_033569	94219	Mm.306903	NM_033569	ENSMUSG00000064105	Cnnm2	AU015877|AW048635|Acdp2|Clp2	cyclin M2	protein-coding
chr8	91313133	91313740	promoter-TSS (NM_011936)	promoter-TSS (NM_011936)	-89	NM_011936	26383	Mm.4375	NM_011936	ENSMUSG00000055932	Fto	AW743446|mKIAA1752	fat mass and obesity associated	protein-coding
chr13	81632879	81633437	promoter-TSS (NM_054053)	promoter-TSS (NM_054053)	-14	NM_054053	110789	Mm.288694	NM_054053	ENSMUSG00000069170	Adgrv1	Frings|Gpr98|Mass1|Mgr1|VLGR1	adhesion G protein-coupled receptor V1	protein-coding
chr6	114502029	114502663	Intergenic	IMPB_01|Satellite|Satellite	43824	NM_001317124	15465	Mm.333327	NM_008285	ENSMUSG00000053004	Hrh1	Bphs|H1R|HH1R|Hir	histamine receptor H1	protein-coding
chr13	75707010	75707951	promoter-TSS (NM_138953)	promoter-TSS (NM_138953)	-4	NM_138953	192657	Mm.21288	NM_138953	ENSMUSG00000001542	Ell2	-	elongation factor RNA polymerase II 2	protein-coding
chr3	19187610	19188633	promoter-TSS (NM_026182)	promoter-TSS (NM_026182)	11	NR_045575	67472	Mm.45125	NM_026182	ENSMUSG00000027601	Mtfr1	1300002C08Rik|1700080D04Rik|2810026O10Rik|4930579E05Rik|Chppr|Fam54a2	mitochondrial fission regulator 1	protein-coding
chr2	29124822	29125585	5' UTR (NM_198033, exon 1 of 26)	5' UTR (NM_198033, exon 1 of 26)	211	NM_198033	269254	Mm.41867	NM_198033	ENSMUSG00000043535	Setx	A130090N03|A930037J23Rik|AOA2|AW060766|Als4|SCAR1|Sen1|mKIAA0625	senataxin	protein-coding
chr16	5255748	5256496	promoter-TSS (NM_027446)	promoter-TSS (NM_027446)	-166	NM_027446	70511	Mm.45780	NM_027446	ENSMUSG00000022544	Eef2kmt	5730409G15Rik|Fam86|Fam86a|eEF2-KMT	eukaryotic elongation factor 2 lysine methyltransferase	protein-coding
chr15	40038365	40038702	Intergenic	Intergenic	-6655	NR_155348	102636079	Mm.421381	NR_155348	ENSMUSG00000115142	Gm33251	-	predicted gene, 33251	ncRNA
chr5	97111308	97111945	promoter-TSS (NM_001359913)	promoter-TSS (NM_001359913)	-30	NM_001359913	231474	Mm.332505	NM_198422	ENSMUSG00000055725	Paqr3	6330415A20Rik|AY424292|RKTG	progestin and adipoQ receptor family member III	protein-coding
chr6	47657944	47661054	promoter-TSS (NR_002841).10	promoter-TSS (NR_002841).10	-84	NR_002841	19799		NR_002841		Rn4.5s	-	4.5S RNA	rRNA
chr4	145836495	145838146	non-coding (NR_033612, exon 1 of 1)	non-coding (NR_033612, exon 1 of 1)	101	NR_033612	236069	Mm.276881	NR_033612	ENSMUSG00000096233	Gm13238	-	carnitine deficiency-associated gene expressed in ventricle 3 pseudogene	pseudo
chr5	129941461	129942235	promoter-TSS (NM_027121)	promoter-TSS (NM_027121)	-261	NM_001001327	69568	Mm.288718	NM_027121	ENSMUSG00000066735	Vkorc1l1	2310024K08Rik	vitamin K epoxide reductase complex, subunit 1-like 1	protein-coding
chrY	9207539	9207884	Intergenic	ORR1C2|LTR|ERVL-MaLR	-372542	NM_001017394	100039753	Mm.291725	NM_001017394	ENSMUSG00000101053	Gm20815	-	predicted gene, 20815	protein-coding
chr10	4386451	4387497	intron (NM_001033466, intron 1 of 2)	CpG	501	NM_001359811	381990	Mm.262466	NM_001033466	ENSMUSG00000075327	Zbtb2	Gm1103	zinc finger and BTB domain containing 2	protein-coding
chr6	145932789	145933009	intron (NM_001310837, intron 1 of 2)	LSU-rRNA_Hsa|rRNA|rRNA	1026	NM_001310837	16651	Mm.49689	NM_010656	ENSMUSG00000030255	Sspn	Krag	sarcospan	protein-coding
chr11	87591793	87592410	promoter-TSS (NM_133215)	promoter-TSS (NM_133215)	-65	NM_133215	170749	Mm.399376	NM_133215	ENSMUSG00000018401	Mtmr4	AA596759|ESTM44|FYVE-DSP2|ZFYVE11|mKIAA0647	myotubularin related protein 4	protein-coding
chr10	81292416	81293131	promoter-TSS (NM_001146687)	promoter-TSS (NM_001146687)	-190	NM_001146687	18717	Mm.24222	NM_008844	ENSMUSG00000034902	Pip5k1c	AI115456|AI835305|Pip5kIgamma	phosphatidylinositol-4-phosphate 5-kinase, type 1 gamma	protein-coding
chr11	68691358	68692093	promoter-TSS (NM_175260)	promoter-TSS (NM_175260)	-190	NM_175260	77579	Mm.218233	NM_175260	ENSMUSG00000020900	Myh10	5730504C04Rik|9330167F11Rik|Fltn|Myhn-2|Myhn2|NMHC II-B|NMHC-B|NMHCII-B|NMMHC II-b|NMMHC-B|NMMHC-IIB|SMemb|mKIAA3005	myosin, heavy polypeptide 10, non-muscle	protein-coding
chrX	47866537	47867751	intron (NM_001358618, intron 9 of 23)	L1Md_T|LINE|L1	25469	NM_053123	93761	Mm.229151	NM_053123	ENSMUSG00000031099	Smarca1	5730494M04Rik|Snf2l	SWI/SNF related, matrix associated, actin dependent regulator of chromatin, subfamily a, member 1	protein-coding
chr9	20651644	20652475	promoter-TSS (NM_023371)	promoter-TSS (NM_023371)	-59	NM_001364495	23988	Mm.7906	NM_023371	ENSMUSG00000032171	Pin1	0610025L01Rik|D9Bwg1161e	protein (peptidyl-prolyl cis/trans isomerase) NIMA-interacting 1	protein-coding
chr7	38191078	38192163	intron (NM_028166, intron 2 of 3)	intron (NM_028166, intron 2 of 3)	7833	NM_028166	72244	Mm.187554	NM_028166		1600014C10Rik	AI428873	RIKEN cDNA 1600014C10 gene	protein-coding
chr5	132897299	132897802	Intergenic	ZP3AR|Satellite|Satellite	-354330	NM_001363480	319974	Mm.409595	NM_177047	ENSMUSG00000029673	Auts2	2700063G02Rik|A730011F23Rik|D830032G16Rik	autism susceptibility candidate 2	protein-coding
chr2	118388332	118388913	promoter-TSS (NM_013719)	promoter-TSS (NM_013719)	5	NM_013719	27103	Mm.217616	NM_013719	ENSMUSG00000005102	Eif2ak4	2610011M03|GCN2|MGCN2	eukaryotic translation initiation factor 2 alpha kinase 4	protein-coding
chr7	115817646	115818906	intron (NM_001025559, intron 2 of 15)	L1Md_T|LINE|L1	6434	NM_001277327	20679	Mm.323365	NM_011445	ENSMUSG00000051910	Sox6	AI987981|SOX-LZ	SRY (sex determining region Y)-box 6	protein-coding
chr7	45054069	45054637	intron (NM_022999, intron 6 of 6)	intron (NM_022999, intron 6 of 6)	-1019	NM_175022	233210	Mm.219137	NM_175022	ENSMUSG00000046574	Prr12	6720469B10|BC058674	proline rich 12	protein-coding
chr8	71569452	71570772	promoter-TSS (NM_001357182)	promoter-TSS (NM_001357182)	-482	NM_001357182	26457	Mm.38165	NM_011977	ENSMUSG00000031808	Slc27a1	FATP1|Fatp	solute carrier family 27 (fatty acid transporter), member 1	protein-coding
chr1	38430398	38430677	intron (NM_001290814, intron 4 of 21)	intron (NM_001290814, intron 4 of 21)	196707	NM_001290814	16764	Mm.336679	NM_010678	ENSMUSG00000037138	Aff3	3222402O04Rik|A730046J16|LAF-4|Laf4	AF4/FMR2 family, member 3	protein-coding
chr13	65351558	65352667	Intergenic	CpG	-3518	NM_001371118
chr14	42586153	42587768	Intergenic	L1Md_Gf|LINE|L1	210975	NM_001244671	100042055	Mm.429109	NM_001244671	ENSMUSG00000095226	Gm10377	-	predicted gene 10377	protein-coding
chr3	93284572	93292421	Intergenic	Intergenic	-31253	NM_133698	68723	Mm.208047	NM_133698	ENSMUSG00000041991	Hrnr	1110033K19Rik|A530063N20Rik|S100a18	hornerin	protein-coding
chr15	35155415	35156034	promoter-TSS (NM_001357821)	promoter-TSS (NM_001357821)	82	NM_001357821	56274	Mm.262330	NM_019635	ENSMUSG00000022329	Stk3	0610042I06Rik|MST|Mst2|Mst3|Ste20|mess1	serine/threonine kinase 3	protein-coding
chr3	66670039	66671187	Intergenic	L1Md_T|LINE|L1	308198	NM_001302358	20429	Mm.39093	NM_013665	ENSMUSG00000027833	Shox2	6330543G17Rik|OG12|Og12x|Prx3|SHOT	short stature homeobox 2	protein-coding
chr11	54140050	54140634	Intergenic	(GGA)n|Simple_repeat|Simple_repeat	39418	NM_011031	18452	Mm.3705	NM_011031	ENSMUSG00000018906	P4ha2	AA407196|C76437|P4hl	procollagen-proline, 2-oxoglutarate 4-dioxygenase (proline 4-hydroxylase), alpha II polypeptide	protein-coding
chr12	62176778	62178125	Intergenic	L1Md_T|LINE|L1	-510336	NR_131949	73309	Mm.276558	NR_131949		Spanxn4	1700047L15Rik	SPANX family, member N4	ncRNA
chr5	129315609	129316024	Intergenic	C-rich|Low_complexity|Low_complexity	-185415	NM_172276	231769	Mm.288714	NM_172276	ENSMUSG00000029439	Sfswap	1190005N23Rik|6330437E22Rik|AI197402|AW212079|SWAP|Sfrs8|Srsf8	splicing factor SWAP	protein-coding
chr9	66795349	66796065	promoter-TSS (NM_177583)	promoter-TSS (NM_177583)	-284	NM_177583	208117	Mm.41291	NM_177583	ENSMUSG00000032375	Aph1b	2310057K14Rik|Aph1c	aph1 homolog B, gamma secretase subunit	protein-coding
chr3	95015290	95016499	promoter-TSS (NM_030074)	promoter-TSS (NM_030074)	-437	NM_001357863	78266	Mm.389478	NM_030074	ENSMUSG00000019338	Zfp687	4931408L03Rik|Znf687|mKIAA1441	zinc finger protein 687	protein-coding
chr16	64850972	64852269	promoter-TSS (NM_178647)	promoter-TSS (NM_178647)	103	NM_001347245	72020	Mm.25960	NM_028059	ENSMUSG00000047141	Zfp654	1600021C16Rik|1810008K20Rik|433036|Gm5488|Znf654	zinc finger protein 654	protein-coding
chr15	81810590	81812053	promoter-TSS (NM_017376)	promoter-TSS (NM_017376)	-93	NM_017376	21685	Mm.270278	NM_017376	ENSMUSG00000022389	Tef	2310028D20Rik	thyrotroph embryonic factor	protein-coding
chr4	146239244	146240311	Intergenic	CpG	-30608	NM_001083918	666532	Mm.392861	NM_001083918	ENSMUSG00000067916	Zfp991	Gm13139	zinc finger protein 991	protein-coding
chr5	70761532	70762536	intron (NM_010252, intron 8 of 8)	L1Md_T|LINE|L1	80583	NM_010252	14405	Mm.255292	NM_010252	ENSMUSG00000001260	Gabrg1	GabaA|GabaA/BZ	gamma-aminobutyric acid (GABA) A receptor, subunit gamma 1	protein-coding
chr4	33247468	33248795	exon (NM_001033225, exon 1 of 2)	exon (NM_001033225, exon 1 of 2)	656	NM_001033225	108767	Mm.27769	NM_001033225	ENSMUSG00000040128	Pnrc1	5730463C12Rik|B4-2|PRR2|Prol2	proline-rich nuclear receptor coactivator 1	protein-coding
chr4	132289069	132289300	intron (NM_025579, intron 3 of 5)	intron (NM_025579, intron 3 of 5)	14172	NM_001081651	242681	Mm.331927	NM_001081651	ENSMUSG00000089687	Rab42	9530096D07Rik|Rab42-ps	RAB42, member RAS oncogene family	protein-coding
chr13	14063057	14064993	promoter-TSS (NM_010282)	promoter-TSS (NM_010282)	241	NM_198122	94246	Mm.439784	NM_194262	ENSMUSG00000039219	Arid4b	BCAA|BRCAA1|RBBP1L1|Rbp1l1|SAP180	AT rich interactive domain 4B (RBP1-like)	protein-coding
chr14	45219304	45220384	promoter-TSS (NM_001310534)	promoter-TSS (NM_001310534)	127	NM_027518	70713	Mm.343793	NM_027518	ENSMUSG00000049092	Gpr137c	6330416L11Rik|Gm908|TM7SF1L2	G protein-coupled receptor 137C	protein-coding
chr16	21204356	21205317	promoter-TSS (NM_010143)	promoter-TSS (NM_010143)	41	NM_010143	13845	Mm.6972	NM_010143	ENSMUSG00000005958	Ephb3	AW456895|Cek10|Etk2|HEK2|MDK5|Sek4|Tyro6	Eph receptor B3	protein-coding
chr5	38022960	38023377	Intergenic	(GGGAGA)n|Simple_repeat|Simple_repeat	-16062	NM_001289536	71116	Mm.18959	NM_026959	ENSMUSG00000029125	Stx18	1810035L21Rik|4933425D03Rik|AU041562	syntaxin 18	protein-coding
chr1	93477920	93479342	promoter-TSS (NM_001159719)	promoter-TSS (NM_001159719)	-254	NM_001357556	110611	Mm.30012	NM_133808	ENSMUSG00000034088	Hdlbp	1110005P14Rik|AA960365|AI118566|D1Ertd101e	high density lipoprotein (HDL) binding protein	protein-coding
chr3	63675737	63676935	Intergenic	L1Md_T|LINE|L1	174949	NM_001370985
chr1	80340547	80341304	promoter-TSS (NM_001313728)	promoter-TSS (NM_001313728)	-235	NM_016716	26554	Mm.12665	NM_016716	ENSMUSG00000004364	Cul3	KIAA0617	cullin 3	protein-coding
chr12	111813790	111814549	promoter-TSS (NM_028875)	promoter-TSS (NM_028875)	-1	NM_026752	68520	Mm.390497	NM_026752	ENSMUSG00000021286	Zfyve21	1110013H04Rik|AW558780|C85416	zinc finger, FYVE domain containing 21	protein-coding
chr12	101718112	101718990	promoter-TSS (NM_001082976)	promoter-TSS (NM_001082976)	-28	NM_001082976	74413	Mm.275939	NM_028924	ENSMUSG00000021187	Tc2n	4933406D09Rik|Mtac2d1|Tac2-N	tandem C2 domains, nuclear	protein-coding
chr7	48632746	48633673	Intergenic	L1Md_T|LINE|L1	10592	NM_207537	404238	Mm.377926	NM_207537	ENSMUSG00000070546	Mrgprb3	MrgB3	MAS-related GPR, member B3	protein-coding
chr17	28224064	28224446	intron (NM_027185, intron 7 of 10)	intron (NM_027185, intron 7 of 10)	-8499	NM_011145	19015	Mm.328914	NM_011145	ENSMUSG00000002250	Ppard	NUC-1|NUC1|Nr1c2|PPAR-beta|PPAR-delta|PPAR[b]|PPARdelta|Pparb|Pparb/d	peroxisome proliferator activator receptor delta	protein-coding
chr12	54729105	54730393	Intergenic	U1|snRNA|snRNA	-33855	NM_025456	66266	Mm.156440	NM_025456	ENSMUSG00000054302	Eapp	1810011O16Rik	E2F-associated phosphoprotein	protein-coding
chr14	40966609	40967451	promoter-TSS (NM_145928)	promoter-TSS (NM_145928)	-134	NM_145928	52588	Mm.28876	NM_145928	ENSMUSG00000037824	Tspan14	AA958793|D14Ertd226e|Tm4sf14|tspan-14	tetraspanin 14	protein-coding
chr12	72085200	72086296	promoter-TSS (NM_024205)	promoter-TSS (NM_024205)	-91	NM_001205067	104771	Mm.258935	NM_024205	ENSMUSG00000005078	Jkamp	1200003C05Rik|2310047L11Rik|Jamp	JNK1/MAPK8-associated membrane protein	protein-coding
chr14	67008457	67009225	promoter-TSS (NM_009761)	promoter-TSS (NM_009761)	36	NM_009761	12177	Mm.29820	NM_009761	ENSMUSG00000022051	Bnip3l	C86132|D14Ertd719e|Nip3L|Nix	BCL2/adenovirus E1B interacting protein 3-like	protein-coding
chr7	27178395	27179427	promoter-TSS (NM_029391)	promoter-TSS (NM_029391)	-28	NM_029391	19342	Mm.482114	NM_029391	ENSMUSG00000053291	Rab4b	1500031G17Rik	RAB4B, member RAS oncogene family	protein-coding
chr14	116233025	116233988	intron (NM_175500, intron 7 of 7)	L1Md_T|LINE|L1	-691791	NM_001079844	23888	Mm.440025	NM_011821	ENSMUSG00000058571	Gpc6	-	glypican 6	protein-coding
chr8	52836240	52837839	Intergenic	L1Md_T|LINE|L1	480428	NR_151738	330767	Mm.246790	NR_151738	ENSMUSG00000110013	1190028D05Rik	-	RIKEN cDNA 1190028D05 gene	ncRNA
chr7	16874806	16875425	promoter-TSS (NM_001081655)	promoter-TSS (NM_001081655)	-202	NM_001081655	629378	Mm.491123	NM_001081655	ENSMUSG00000078794	Dact3	EG666671|naa-3	dishevelled-binding antagonist of beta-catenin 3	protein-coding
chr11	49846389	49847105	promoter-TSS (NM_001163671)	promoter-TSS (NM_001163671)	-4	NM_001163671	26420	Mm.68933	NM_016961	ENSMUSG00000020366	Mapk9	AI851083|JNK2|Prkm9|p54aSAPK	mitogen-activated protein kinase 9	protein-coding
chr2	25224097	25225414	promoter-TSS (NM_146116)	promoter-TSS (NM_146116)	-53	NM_146116	227613	Mm.227260	NM_146116	ENSMUSG00000036752	Tubb4b	4930542G03Rik|Tubb2c|Tubb2c1	tubulin, beta 4B class IVB	protein-coding
chr7	6201447	6202048	intron (NM_178028, intron 1 of 5)	ZP3AR|Satellite|Satellite	4657	NM_178028	232836	Mm.246599	NM_178028	ENSMUSG00000034660	Galp	-	galanin-like peptide	protein-coding
chr7	79272882	79273438	promoter-TSS (NM_018811)	promoter-TSS (NM_018811)	-106	NM_018811	54608	Mm.365490	NM_018811	ENSMUSG00000039202	Abhd2	2210009N18Rik|LABH2|Labh-2	abhydrolase domain containing 2	protein-coding
chr6	8509032	8510295	promoter-TSS (NM_133236)	promoter-TSS (NM_133236)	63	NM_133236	170772	Mm.210787	NM_133236	ENSMUSG00000029638	Glcci1	2310047L21Rik|A130036A18Rik|Fam117c|Gig18|Tssn1	glucocorticoid induced transcript 1	protein-coding
chr3	100922016	100922678	promoter-TSS (NM_001165952)	promoter-TSS (NM_001165952)	-146	NM_001165953	229644	Mm.189351	NM_194343	ENSMUSG00000033233	Trim45	4921530N01Rik	tripartite motif-containing 45	protein-coding
chr10	19591588	19592254	promoter-TSS (NM_010511)	promoter-TSS (NM_010511)	-28	NM_010511	15979	Mm.549	NM_010511	ENSMUSG00000020009	Ifngr1	CD119|IFN-gammaR|Ifgr|Ifngr|Nktar	interferon gamma receptor 1	protein-coding
chr5	135688748	135689406	promoter-TSS (NM_008898)	promoter-TSS (NM_008898)	-68	NM_008898	18984	Mm.3863	NM_008898	ENSMUSG00000005514	Por	4933424M13Rik|CPR|CYPOR|P450R	P450 (cytochrome) oxidoreductase	protein-coding
chr3	67262557	67264026	intron (NM_001356280, intron 5 of 7)	intron (NM_001356280, intron 5 of 7)	-110806	NM_010801	17349	Mm.10414	NM_010801	ENSMUSG00000048416	Mlf1	HLS7	myeloid leukemia factor 1	protein-coding
chr5	145203996	145204694	promoter-TSS (NM_001167944)	promoter-TSS (NM_001167944)	-214	NM_001167944	22757	Mm.332842	NM_016683	ENSMUSG00000055991	Zkscan5	AI132486|AI326970|Zfp95|hKraba1	zinc finger with KRAB and SCAN domains 5	protein-coding
chr18	36559513	36561366	promoter-TSS (NM_175375)	promoter-TSS (NM_175375)	-164	NM_175375	108857	Mm.482287	NM_175375	ENSMUSG00000024483	Ankhd1	1110004O12Rik|4933432B13Rik|9130019P20Rik|A530027J04Rik|A630021B20Rik|AA571404|Mask|mFLJ00246|mKIAA1085	ankyrin repeat and KH domain containing 1	protein-coding
chr11	97186910	97188771	promoter-TSS (NM_008379)	promoter-TSS (NM_008379)	52	NM_008379	16211	Mm.251013	NM_008379	ENSMUSG00000001440	Kpnb1	AA409963|IPOB|Impnb	karyopherin (importin) beta 1	protein-coding
chr14	64949401	64950318	promoter-TSS (NM_001253731)	promoter-TSS (NM_001253731)	-2	NM_177338	219150	Mm.344074	NM_177338	ENSMUSG00000021972	Hmbox1	AI451877|AI604847|F830020C16Rik	homeobox containing 1	protein-coding
chr2	172714329	172714678	Intergenic	Intergenic	163512	NM_001159696	21420	Mm.3629	NM_009335	ENSMUSG00000028640	Tfap2c	AA409384|AP2gamma|Ap-2.2|Stra2|Tcfap2c	transcription factor AP-2, gamma	protein-coding
chr19	5686720	5687070	intron (NM_144868, intron 3 of 34)	intron (NM_144868, intron 3 of 34)	2013	NM_144868	104401	Mm.329650	NM_144868	ENSMUSG00000054874	Pcnx3	Pcnxl3|mKIAA4073	pecanex homolog 3	protein-coding
chr11	69920827	69921862	promoter-TSS (NM_001166590)	promoter-TSS (NM_001166590)	42	NM_001166591	276770	Mm.18026	NM_181582	ENSMUSG00000078812	Eif5a	AA410058|D19Wsu54e|Eif4d|Eif5a1|eIF-4D|eIF-5A|eIF-5A-1|eIF-5A1	eukaryotic translation initiation factor 5A	protein-coding
chr19	11965059	11965865	promoter-TSS (NM_001033174)	promoter-TSS (NM_001033174)	-382	NM_001033174	76303	Mm.291279	NM_001033174	ENSMUSG00000024687	Osbp	1110018F06Rik|AW559088|mKIAA4220	oxysterol binding protein	protein-coding
chr18	31633974	31635197	promoter-TSS (NM_001357555)	promoter-TSS (NM_001357555)	217	NM_001357554	269003	Mm.194538	NM_172965	ENSMUSG00000024260	Sap130	2610304F09Rik|6720406D06	Sin3A associated protein	protein-coding
chr1	183299142	183299570	intron (NM_181732, intron 1 of 9)	RLTR33|LTR|ERVK	-2063	NM_001357242	71678	Mm.392270	NM_027861	ENSMUSG00000046836	Brox	0610010K06Rik	BRO1 domain and CAAX motif containing	protein-coding
chr3	152486136	152486705	intron (NM_001081277, intron 10 of 13)	CpG	89736	NM_001287139	108946	Mm.379292	NM_198416	ENSMUSG00000039068	Zzz3	3110065C23Rik|6430567E01Rik|AA408566|AI481057|AW556059|R75514	zinc finger, ZZ domain containing 3	protein-coding
chr2	143914861	143915719	promoter-TSS (NM_019771)	promoter-TSS (NM_019771)	-41	NM_019771	56431	Mm.28919	NM_019771	ENSMUSG00000015932	Dstn	2610043P17Rik|ADF|AU042046|Dsn|corn1|sid23p	destrin	protein-coding
chr10	128565511	128566377	promoter-TSS (NM_011119)	promoter-TSS (NM_011119)	-10	NM_011119	18813	Mm.4742	NM_011119	ENSMUSG00000025364	Pa2g4	38kDa|AA672939|Ebp1|Plfap	proliferation-associated 2G4	protein-coding
chr3	80866800	80867237	intron (NM_001281969, intron 4 of 9)	intron (NM_001281969, intron 4 of 9)	45100	NM_001345996	14658	Mm.275639	NM_010298	ENSMUSG00000028020	Glrb	AI853901|Glyrb|spa|spastic	glycine receptor, beta subunit	protein-coding
chr3	5435467	5436386	Intergenic	L1Md_T|LINE|L1	140322	NM_001163301	19302	Mm.132336	NM_008994	ENSMUSG00000040374	Pex2	D3Ertd138e|PAF-1|PMP35|Pxmp3	peroxisomal biogenesis factor 2	protein-coding
chr1	52232276	52233718	5' UTR (NM_001113383, exon 1 of 15)	5' UTR (NM_001113383, exon 1 of 15)	235	NM_001081081	14660	Mm.398608	NM_001081081	ENSMUSG00000026103	Gls	6330442B14|AI314027|B230365M23Rik	glutaminase	protein-coding
chr15	76659637	76660509	promoter-TSS (NM_001358912)	promoter-TSS (NM_001358912)	135	NM_019396	54151	Mm.247752	NM_019396	ENSMUSG00000053929	Cyhr1	1110031M01Rik|AU042374|Chrp	cysteine and histidine rich 1	protein-coding
chr12	116280462	116281945	promoter-TSS (NM_028731)	promoter-TSS (NM_028731)	-19	NM_028731	52635	Mm.273755	NM_028731	ENSMUSG00000021171	Esyt2	2410017M09Rik|4921504I16Rik|CHR2SYT|D12Ertd551e|Fam62b	extended synaptotagmin-like protein 2	protein-coding
chr7	25076856	25077588	5' UTR (NM_001168506, exon 2 of 3)	5' UTR (NM_001168506, exon 2 of 3)	415	NM_175477	232976	Mm.41568	NM_175477	ENSMUSG00000045252	Zfp574	A630056B21Rik|Znf574	zinc finger protein 574	protein-coding
chr17	24960291	24961126	promoter-TSS (NM_198937)	promoter-TSS (NM_198937)	-85	NM_198937	52009	Mm.371601	NM_198937	ENSMUSG00000024165	Jpt2	2810430B18Rik|AL022629|C16orf34|D17Ertd441e|Hn1l	Jupiter microtubule associated homolog 2	protein-coding
chr15	55683692	55684776	intron (NM_016667, intron 3 of 6)	L1Md_T|LINE|L1	126826	NM_001168250	105837	Mm.390829	NM_134092	ENSMUSG00000022369	Mtbp	AI429604|MDM2BP	Mdm2, transformed 3T3 cell double minute p53 binding protein	protein-coding
chr1	75168320	75169280	promoter-TSS (NM_026846)	promoter-TSS (NM_026846)	65	NM_026846	68818	Mm.32646	NM_026846	ENSMUSG00000026197	Zfand2b	1110060O18Rik|C81256	zinc finger, AN1 type domain 2B	protein-coding
chr2	103073231	103073962	promoter-TSS (NM_001355473)	promoter-TSS (NM_001355473)	-79	NM_001355473	56369	Mm.24772	NM_019735	ENSMUSG00000010911	Apip	APIP2|CGI-29|Mmrp19	APAF1 interacting protein	protein-coding
chr11	29692498	29694207	promoter-TSS (NM_194051)	promoter-TSS (NM_194051)	-422	NM_194051	68585	Mm.192580	NM_024226	ENSMUSG00000020458	Rtn4	1110020G17Rik|AA407876|AA409940|AA960376|ASY|C130026I10Rik|NOGO|NSP-CL|NgA|Nogo-A|Nogo-B|Nogo-C|mKIAA0886|mKIAA4153	reticulon 4	protein-coding
chr6	94699615	94700528	promoter-TSS (NM_008377)	promoter-TSS (NM_008377)	74	NM_008377	16206	Mm.245210	NM_008377	ENSMUSG00000030029	Lrig1	D6Bwg0781e|Img|LIG-1	leucine-rich repeats and immunoglobulin-like domains 1	protein-coding
chr12	113000384	113001178	promoter-TSS (NM_028193)	promoter-TSS (NM_028193)	-160	NM_028193	72308	Mm.196721	NM_028193	ENSMUSG00000011158	Brf1	2510002F24Rik|GTF3B|TAF3C|TAFIII90|TFIIIB90|mTFIIIB90	BRF1, RNA polymerase III transcription initiation factor 90 kDa subunit	protein-coding
chr3	86335172	86336383	intron (NM_030695, intron 22 of 56)	L1Md_T|LINE|L1	111087	NM_001077688	80877	Mm.439825	NM_030695	ENSMUSG00000028080	Lrba	C80285|D3Ertd775e|Lab300|Lba	LPS-responsive beige-like anchor	protein-coding
chr8	70792271	70793120	promoter-TSS (NM_199308)	promoter-TSS (NM_199308)	-262	NM_199308	546071	Mm.250731	NM_199308	ENSMUSG00000031833	Mast3	BC024265|mKIAA0561	microtubule associated serine/threonine kinase 3	protein-coding
chr1	193035237	193036246	promoter-TSS (NM_001301370)	promoter-TSS (NM_001301370)	34	NM_181546	329324	Mm.76710	NM_181546	ENSMUSG00000016200	Syt14	B230320I09Rik|sytXIV	synaptotagmin XIV	protein-coding
chr10	22142395	22143049	intron (NM_001254744, intron 1 of 1)	B1_Mus1|SINE|Alu	6548	NM_001254744	319887	Mm.177746	NM_001254744	ENSMUSG00000097327	E030030I06Rik	-	RIKEN cDNA E030030I06 gene	protein-coding
chr9	57073023	57073967	intron (NM_001110351, intron 1 of 21)	intron (NM_001110351, intron 1 of 21)	1455	NM_001110351	20466	Mm.15755	NM_011378	ENSMUSG00000042557	Sin3a	AW553200|Sin3|mKIAA4126|mSin3A	transcriptional regulator, SIN3A (yeast)	protein-coding
chr9	122294122	122294916	promoter-TSS (NM_001271873)	promoter-TSS (NM_001271873)	-96	NM_001271873	102566	Mm.87676	NM_133979	ENSMUSG00000037949	Ano10	AI604832|Tmem16k	anoctamin 10	protein-coding
chr1	165460153	165461517	promoter-TSS (NM_027430)	promoter-TSS (NM_027430)	-372	NM_028759	74106	Mm.227605	NM_028759	ENSMUSG00000026571	Dcaf6	1200006M05Rik|Iqwd1|PC326	DDB1 and CUL4 associated factor 6	protein-coding
chr9	98250177	98251853	Intergenic	L1Md_T|LINE|L1	-45555	NM_001357452	74080	Mm.294082	NM_144533	ENSMUSG00000032456	Nmnat3	4933408N02Rik|PNAT3	nicotinamide nucleotide adenylyltransferase 3	protein-coding
chr7	113513270	113514448	promoter-TSS (NM_001285831)	promoter-TSS (NM_001285831)	25	NM_001285831	67420	Mm.206919	NM_026143	ENSMUSG00000030759	Far1	2600011M19Rik|2900034E22Rik|3732409C05Rik|AI850429|Mlstd2	fatty acyl CoA reductase 1	protein-coding
chr15	85634413	85635082	Intergenic	CpG	-52926	NM_009528	22422	Mm.306946	NM_009528	ENSMUSG00000022382	Wnt7b	Wnt-7b	wingless-type MMTV integration site family, member 7B	protein-coding
chr14	87264373	87264981	Intergenic	Intergenic	-123453	NM_019670	56419	Mm.440585	NM_019670	ENSMUSG00000022021	Diaph3	4930417P13Rik|Dia2|Diap3|Drf3|p134MDia2	diaphanous related formin 3	protein-coding
chr13	92354536	92355408	promoter-TSS (NM_010829)	promoter-TSS (NM_010829)	31	NM_001311120	17686	Mm.343101	NM_010829	ENSMUSG00000014850	Msh3	D13Em1|Rep-3|Rep3	mutS homolog 3	protein-coding
chr4	129188806	129189873	promoter-TSS (NM_134151)	promoter-TSS (NM_134151)	203	NM_029036	74648	Mm.172064	NM_029036	ENSMUSG00000040928	S100pbp	4930429A08Rik|AI851343|S100pbpr	S100P binding protein	protein-coding
chr2	3512383	3513237	promoter-TSS (NM_177647)	promoter-TSS (NM_177647)	4	NM_015765	50497	Mm.89341	NM_015765	ENSMUSG00000051396	Hspa14	70kDa|HSP70L1|Hsp70-4|NST-1|hsr.1	heat shock protein 14	protein-coding
chr2	39190036	39191059	intron (NM_178778, intron 1 of 17)	CpG	183	NM_178778	320271	Mm.204836	NM_178778	ENSMUSG00000035236	Scai	9330112M16|A930041I02Rik|AI662729	suppressor of cancer cell invasion	protein-coding
chr4	147738486	147739241	Intergenic	CpG	-36232	NM_001127188	100503584	Mm.276881	NM_001127188	ENSMUSG00000062518	Zfp534	Gm13159	zinc finger protein 534	protein-coding
chr7	4684607	4685382	promoter-TSS (NM_024172)	promoter-TSS (NM_024172)	-13	NM_001360629	66245	Mm.6803	NM_024172	ENSMUSG00000063802	Hspbp1	1500019G21Rik	HSPA (heat shock 70kDa) binding protein, cytoplasmic cochaperone 1	protein-coding
chr7	97331836	97332639	promoter-TSS (NM_001177412)	promoter-TSS (NM_001177412)	-86	NM_001039039	622320	Mm.334029	NM_001039039	ENSMUSG00000044952	Kctd21	EG622320	potassium channel tetramerisation domain containing 21	protein-coding
chr8	120518714	120519132	intron (NM_198671, intron 1 of 15)	intron (NM_198671, intron 1 of 15)	-16934	NM_001145897	382034	Mm.334856	NM_198671	ENSMUSG00000031822	Gse1	2210013I18Rik|mKIAA0182	genetic suppressor element 1, coiled-coil protein	protein-coding
chr12	117843349	117844151	promoter-TSS (NM_146040)	promoter-TSS (NM_146040)	-111	NM_146040	217946	Mm.281149	NM_146040	ENSMUSG00000021175	Cdca7l	BC006933|JPO2	cell division cycle associated 7 like	protein-coding
chr8	83972522	83973151	promoter-TSS (NM_008854)	promoter-TSS (NM_008854)	-142	NM_008854	18747	Mm.19111	NM_008854	ENSMUSG00000005469	Prkaca	PKCD|Pkaca	protein kinase, cAMP dependent, catalytic, alpha	protein-coding
chr4	129461222	129462014	promoter-TSS (NM_133889)	promoter-TSS (NM_133889)	-61	NM_133889	100383	Mm.17918	NM_133889	ENSMUSG00000040859	Bsdc1	1110063F24Rik|AW011758	BSD domain containing 1	protein-coding
chr7	16098154	16099045	promoter-TSS (NM_025898)	promoter-TSS (NM_025898)	19	NM_025898	108124	Mm.104540	NM_025898	ENSMUSG00000006024	Napa	1500039N14Rik|AW209189|RA81|SNAP-alpha|SNAPA|SNARE|a-SNAP|hyh	N-ethylmaleimide sensitive fusion protein attachment protein alpha	protein-coding
chr12	54718679	54719835	Intergenic	U1|snRNA|snRNA	-23363	NM_025456	66266	Mm.156440	NM_025456	ENSMUSG00000054302	Eapp	1810011O16Rik	E2F-associated phosphoprotein	protein-coding
chr19	6921693	6922199	promoter-TSS (NM_007953)	promoter-TSS (NM_007953)	-138	NM_007953	26379	Mm.386776	NM_007953	ENSMUSG00000024955	Esrra	ERRalpha|Err1|Estrra|Nr3b1	estrogen related receptor, alpha	protein-coding
chr8	69995944	69997045	promoter-TSS (NM_145596)	promoter-TSS (NM_145596)	-110	NM_001286450	234366	Mm.270044	NM_145596	ENSMUSG00000036180	Gatad2a	1110066C11Rik|BC031407|C80248	GATA zinc finger domain containing 2A	protein-coding
chr11	89060386	89061068	promoter-TSS (NR_110336)	promoter-TSS (NR_110336)	21	NM_001362845	56077	Mm.153695	NM_019505	ENSMUSG00000000276	Dgke	C87606|DAGK6|DGK|DGK-epsilon	diacylglycerol kinase, epsilon	protein-coding
chr2	120628862	120629313	promoter-TSS (NM_001370940)	promoter-TSS (NM_001370940)	-34	NM_001370940	668880	Mm.2289	NM_010621	ENSMUSG00000033705	Stard9	4831403C07Rik|E230025N21Rik|Kif16a|mKIAA1300	START domain containing 9	protein-coding
chr10	80741978	80742581	promoter-TSS (NM_007460)	promoter-TSS (NM_007460)	-4	NM_007460	11776	Mm.27082	NM_007460	ENSMUSG00000020198	Ap3d1	AA407035|Ap3d|Bolvr|mBLVR1|mh|mocha	adaptor-related protein complex 3, delta 1 subunit	protein-coding
chr7	45813959	45814790	promoter-TSS (NM_001112701)	promoter-TSS (NM_001112701)	-58	NM_011181	19158	Mm.272130	NM_011181	ENSMUSG00000003269	Cyth2	ARNO|CLM2|Pscd2	cytohesin 2	protein-coding
chr6	128763922	128764481	Intergenic	4.5SRNA|scRNA|scRNA	24440	NM_008527	17059	Mm.480764	NM_008527	ENSMUSG00000030325	Klrb1c	AI462337|CD161|Klrb1b|Ly-59|Ly55c|Ly59|NK-RP1|NK1.1|NKR-P1.9|NKRP1|NKRP140|Nk-1|Nk-1.2|Nk1|Nk1.2|Nkrp1b|Nkrp1c|ly-55c	killer cell lectin-like receptor subfamily B member 1C	protein-coding
chrY	90807000	90807919	intron (NM_133362, intron 2 of 3)	intron (NM_133362, intron 2 of 3)	22017	NR_137282	170942	Mm.76062	NM_133362	ENSMUSG00000096768	Erdr1	edr	erythroid differentiation regulator 1	protein-coding
chrY	90773241	90779512	Intergenic	Intergenic	-9066	NM_133362	170942	Mm.76062	NM_133362	ENSMUSG00000096768	Erdr1	edr	erythroid differentiation regulator 1	protein-coding
chr4	11965796	11966891	promoter-TSS (NR_040577)	promoter-TSS (NR_040577)	107	NM_001033453	381511	Mm.331489	NM_001033453	ENSMUSG00000049225	Pdp1	Gm1024|Ppm2c	pyruvate dehyrogenase phosphatase catalytic subunit 1	protein-coding
chr8	91133719	91134382	promoter-TSS (NM_001302267)	promoter-TSS (NM_001302267)	-23	NM_001302337	14339	Mm.324588	NM_010241	ENSMUSG00000031667	Aktip	AL023020|Fif|Ft|Ft1|Fts	thymoma viral proto-oncogene 1 interacting protein	protein-coding
chr10	81105630	81106896	intron (NM_001358539, intron 1 of 10)	CpG	348	NM_023138	26396	Mm.275436	NM_023138	ENSMUSG00000035027	Map2k2	AA589381|MEK2|MK2|Prkmk2	mitogen-activated protein kinase kinase 2	protein-coding
chrX	97966289	97967744	Intergenic	L1Md_T|LINE|L1	-181741	NM_013476	11835	Mm.39005	NM_013476	ENSMUSG00000046532	Ar	AW320017|Tfm	androgen receptor	protein-coding
chr5	33652114	33653030	promoter-TSS (NM_001289724)	promoter-TSS (NM_001289724)	2	NM_001289724	20492	Mm.4172	NM_009193	ENSMUSG00000004642	Slbp	-	stem-loop binding protein	protein-coding
chr1	153332242	153333583	promoter-TSS (NM_010683)	promoter-TSS (NM_010683)	-126	NM_010683	226519	Mm.1249	NM_010683	ENSMUSG00000026478	Lamc1	Lamb2	laminin, gamma 1	protein-coding
chr7	52005583	52006501	promoter-TSS (NR_027704)	promoter-TSS (NR_027704)	-24	NM_001160345	75744	Mm.386823	NM_001160345	ENSMUSG00000074093	Svip	1700006C13Rik|6620401M08Rik	small VCP/p97-interacting protein	protein-coding
chr16	38088121	38089744	promoter-TSS (NM_019827)	promoter-TSS (NM_019827)	-69	NM_001347232	56637	Mm.394930	NM_019827	ENSMUSG00000022812	Gsk3b	7330414F15Rik|8430431H08Rik|C86142|GSK-3|GSK-3beta|GSK3	glycogen synthase kinase 3 beta	protein-coding
chr19	21928157	21929546	Intergenic	L1Md_F|LINE|L1	150511	NM_031997	83921	Mm.329776	NM_031997	ENSMUSG00000024754	Cemip2	Tmem2	cell migration inducing hyaluronidase 2	protein-coding
chr7	30717248	30717755	intron (NM_018731, intron 10 of 21)	intron (NM_018731, intron 10 of 21)	5292	NM_001290627	11944	Mm.12821	NM_018731	ENSMUSG00000005553	Atp4a	-	ATPase, H+/K+ exchanging, gastric, alpha polypeptide	protein-coding
chr13	66440942	66441280	promoter-TSS (NM_183119)	promoter-TSS (NM_183119)	7	NM_001290196	76803	Mm.183391	NM_183119	ENSMUSG00000074832	2410141K09Rik	4930482J15Rik|Ayu21-35|Gt(pU21)35Imeg	RIKEN cDNA 2410141K09 gene	protein-coding
chr15	102517839	102518728	promoter-TSS (NM_001253795)	promoter-TSS (NM_001253795)	91	NM_001253795	21357	Mm.291485	NM_009319	ENSMUSG00000023051	Tarbp2	Prbp|TRBP	TARBP2, RISC loading complex RNA binding subunit	protein-coding
chr3	104219908	104220863	promoter-TSS (NM_133853)	promoter-TSS (NM_133853)	21	NM_001159354	99470	Mm.264849	NM_133853	ENSMUSG00000052539	Magi3	4732496O19Rik|6530407C02Rik|AA407180|AI120132|mKIAA1634	membrane associated guanylate kinase, WW and PDZ domain containing 3	protein-coding
chr18	59953753	59954932	Intergenic	L1Md_T|LINE|L1	-257735	NM_001033767	240327	Mm.357104	NM_001033767	ENSMUSG00000073555	Gm4951	EG240327|Ifgga2	predicted gene 4951	protein-coding
chr4	147954503	147955504	Intergenic	(TG)n|Simple_repeat|Simple_repeat	14108	NM_029841	77034	Mm.183076	NM_029841	ENSMUSG00000044496	2510039O18Rik	Kiaa2013	RIKEN cDNA 2510039O18 gene	protein-coding
chr1	177796032	177796869	promoter-TSS (NM_007422)	promoter-TSS (NM_007422)	59	NM_007422	11566	Mm.338021	NM_007422	ENSMUSG00000015961	Adss	AI314886|AS|Adss2	adenylosuccinate synthetase, non muscle	protein-coding
chr12	108333531	108334502	promoter-TSS (NM_010010)	promoter-TSS (NM_010010)	-300	NM_010010	13116	Mm.41911	NM_010010	ENSMUSG00000021259	Cyp46a1	CH24H|Cyp46	cytochrome P450, family 46, subfamily a, polypeptide 1	protein-coding
chr8	20550129	20550646	Intergenic	CpG	-64540	NM_001270553	100861668	Mm.491087	NM_001270553	ENSMUSG00000095294	Gm21119	-	predicted gene, 21119	protein-coding
chr12	118300954	118302502	promoter-TSS (NM_001166385)	promoter-TSS (NM_001166385)	-288	NM_009239	20688	Mm.34699	NM_009239	ENSMUSG00000025323	Sp4	5730497N03Rik|HF-1b|HF1-b	trans-acting transcription factor 4	protein-coding
chr11	53430712	53431305	promoter-TSS (NM_001326614)	promoter-TSS (NM_001326614)	-177	NM_025352	22272	Mm.251621	NM_025352	ENSMUSG00000044894	Uqcrq	1100001F06Rik|1500040F11Rik|5830407L17Rik|9.5kDa|AA959903|QP-C|Qpc|Uqcrb|c1502	ubiquinol-cytochrome c reductase, complex III subunit VII	protein-coding
chr2	56798783	56801261	Intergenic	L1Md_T|LINE|L1	14211	NR_105751	102465169		NR_105751	ENSMUSG00000098437	Mir195b	Gm27491|mmu-mir-195b	microRNA 195b	ncRNA
chr6	50596511	50597151	promoter-TSS (NM_027564)	promoter-TSS (NM_027564)	-241	NM_027564	70821	Mm.157323	NM_027564	ENSMUSG00000029828	4921507P07Rik	TISP74	RIKEN cDNA 4921507P07 gene	protein-coding
chr4	123904571	123905470	promoter-TSS (NM_019660)	promoter-TSS (NM_019660)	7	NM_019660	56309	Mm.446553	NM_019660	ENSMUSG00000028647	Mycbp	5730488M09Rik|AW552132|AW742590|Amy-1	MYC binding protein	protein-coding
chr8	20424051	20424958	intron (NR_028428, intron 1 of 5)	CpG	310	NR_028428	381598	Mm.359054	NM_001024708	ENSMUSG00000071793	2610005L07Rik	2810038F24Rik|6720476A01Rik	cadherin 11 pseudogene	pseudo
chr17	32320431	32321765	TTS (NM_017476)	TTS (NM_017476)	140	NM_019774	56399	Mm.328945	NM_019774	ENSMUSG00000024045	Akap8	1200016A02Rik|AA673585|AKAP-8|AKAP95|AU015639	A kinase (PRKA) anchor protein 8	protein-coding
chr7	4739694	4740418	promoter-TSS (NM_001115018)	promoter-TSS (NM_001115018)	-71	NM_146177	232811	Mm.247844	NM_146177	ENSMUSG00000059851	Kmt5c	BC024816|Suv4-20h2|Suv420h2	lysine methyltransferase 5C	protein-coding
chr2	37358493	37359275	intron (NM_026176, intron 1 of 3)	intron (NM_026176, intron 1 of 3)	448	NM_026176	67466	Mm.30709	NM_026176	ENSMUSG00000009030	Pdcl	1200011E13Rik|AW108059|PhLP1	phosducin-like	protein-coding
chr18	59730100	59731734	Intergenic	L1Md_T|LINE|L1	151287	NR_105773	102465182		NR_105773	ENSMUSG00000098287	Mir6355	Gm27473|mmu-mir-6355	microRNA 6355	ncRNA
chr13	111489371	111490610	5' UTR (NM_001361926, exon 1 of 11)	5' UTR (NM_001361926, exon 1 of 11)	137	NM_001361925	73274	Mm.57286	NM_028487	ENSMUSG00000032745	Gpbp1	1700034P14Rik|AU019836|D230035M11Rik|Gpbp|mGPBP	GC-rich promoter binding protein 1	protein-coding
chr5	72491854	72492252	intron (NM_001122756, intron 1 of 21)	ORR1B2|LTR|ERVL-MaLR	12155	NM_016869	53419	Mm.332425	NM_016869	ENSMUSG00000005220	Corin	AV273130|Lrp4	corin, serine peptidase	protein-coding
chr18	74778363	74779472	promoter-TSS (NR_028560)	promoter-TSS (NR_028560)	-295	NM_177470	52538	Mm.245724	NM_177470	ENSMUSG00000036880	Acaa2	0610011L04Rik|AI255831|AI265397|D18Ertd240e	acetyl-Coenzyme A acyltransferase 2 (mitochondrial 3-oxoacyl-Coenzyme A thiolase)	protein-coding
chr15	79690352	79691153	promoter-TSS (NM_013818)	promoter-TSS (NM_013818)	-144	NM_013818	14904	Mm.19080	NM_013818	ENSMUSG00000042535	Gtpbp1	AL022987|AW045683|C85212|GP-1|Gtpbp	GTP binding protein 1	protein-coding
chr15	81190317	81191096	promoter-TSS (NM_001082536)	promoter-TSS (NM_001082536)	30	NM_001082536	223701	Mm.439814	NM_153049	ENSMUSG00000042292	Mrtfa	AMKL|Bsac|Mal|Mkl1|Mrtf-A	myocardin related transcription factor A	protein-coding
chr14	7313939	7315685	Intergenic	CpG	17583	NM_001025085	545013	Mm.422841	NM_001025085	ENSMUSG00000072726	Gm5797	EG545013	predicted gene 5797	protein-coding
chr1	125560331	125561648	promoter-TSS (NM_028787)	promoter-TSS (NM_028787)	-13	NM_028787	74150	Mm.28654	NM_028787	ENSMUSG00000026342	Slc35f5	1300003P13Rik|AI646727	solute carrier family 35, member F5	protein-coding
chr3	84155265	84155934	intron (NM_029797, intron 1 of 7)	CpG	187	NM_029797	76915	Mm.274829	NM_029797	ENSMUSG00000033752	Mnd1	2610034E18Rik|AI591601|Gaj	meiotic nuclear divisions 1	protein-coding
chr14	6756400	6757650	promoter-TSS (NM_001309401)	promoter-TSS (NM_001309401)	32	NM_001309401	100041151	Mm.396155	NM_001309401	ENSMUSG00000091754	Gm3636	100042043	predicted gene 3636	protein-coding
chr4	83623214	83623475	intron (NM_001355378, intron 10 of 25)	intron (NM_001355378, intron 10 of 25)	97768	NM_001369173	320226	Mm.180032	NM_029117	ENSMUSG00000052407	Ccdc171	4930418J05Rik|4930473A06Rik|A330015D16Rik	coiled-coil domain containing 171	protein-coding
chr3	159767166	159768218	Intergenic	L1Md_T|LINE|L1	-71958	NM_026582	68151	Mm.6766	NM_026582	ENSMUSG00000028173	Wls	5031439A09Rik|AI173978|AI987742|EVI|Gpr177	wntless WNT ligand secretion mediator	protein-coding
chr7	101501087	101501585	intron (NM_001008548, intron 8 of 30)	intron (NM_001008548, intron 8 of 30)	25960	NR_029791	387157		NR_029791	ENSMUSG00000065446	Mir139	Mirn139|mir-139|mmu-mir-139	microRNA 139	ncRNA
chr7	111082551	111083568	promoter-TSS (NM_013507)	promoter-TSS (NM_013507)	-29	NM_001040131	13690	Mm.185453	NM_013507	ENSMUSG00000005610	Eif4g2	DAP-5|E130105L11Rik|Nat1|Natm1|p97	eukaryotic translation initiation factor 4, gamma 2	protein-coding
chr18	6135398	6136791	promoter-TSS (NM_029277)	promoter-TSS (NM_029277)	4	NM_029277	75415	Mm.239675	NM_029277	ENSMUSG00000041225	Arhgap12	2810011M08Rik	Rho GTPase activating protein 12	protein-coding
chr14	42715105	42715636	Intergenic	L1Md_T|LINE|L1	82565	NM_001244671	100042055	Mm.429109	NM_001244671	ENSMUSG00000095226	Gm10377	-	predicted gene 10377	protein-coding
chr6	96595653	96596942	intron (NM_182808, intron 3 of 4)	L1Md_T|LINE|L1	-430092	NR_003643	78482	Mm.391486	NM_030107	ENSMUSG00000072878	1700123L14Rik	Npap60|Nup50	nucleoporin 50 pseudogene	pseudo
chr17	26715235	26716736	intron (NM_029870, intron 1 of 8)	CpG	335	NM_029870	77128	Mm.275414	NM_029870	ENSMUSG00000048249	Crebrf	A930001N09Rik|LRF	CREB3 regulatory factor	protein-coding
chr14	106337771	106339218	Intergenic	L1Md_T|LINE|L1	148026	NR_045938	73631	Mm.48862	NR_045938	ENSMUSG00000099794	1700128A07Rik	-	RIKEN cDNA 1700128A07 gene	ncRNA
chr5	113164834	113165499	Intergenic	Intergenic	-1853	NM_172884	243219	Mm.160131	NM_172884	ENSMUSG00000051339	2900026A02Rik	8430408O14Rik|A530094D01|AW539426|Gm449|Kiaa1671|mKIAA1671	RIKEN cDNA 2900026A02 gene	protein-coding
chr2	165861364	165862238	intron (NM_001363018, intron 2 of 23)	CpG	-3628	NM_001252585	228880	Mm.227598	NM_027230	ENSMUSG00000039671	Zmynd8	1110013E22Rik|2010005I16Rik|3632413B07Rik|AI316811|AL024039|Prkcbp1|RACK7	zinc finger, MYND-type containing 8	protein-coding
chr13	54789038	54789866	promoter-TSS (NM_028841)	promoter-TSS (NM_028841)	47	NM_028841	74257	Mm.32883	NM_028841	ENSMUSG00000025875	Tspan17	2210021G21Rik|AI047581|Fbxo23|Tm4sf17	tetraspanin 17	protein-coding
chr5	15663285	15664128	Intergenic	Lx2A1|LINE|L1	-6647	NR_073011	381715	Mm.382859	NR_073011	ENSMUSG00000069720	4930572O03Rik	-	spermatogenesis associated glutamate (E)-rich protein pseudogene	pseudo
chr11	56203871	56205276	Intergenic	L1Md_T|LINE|L1	-163586	NM_153079	216749	Mm.213205	NM_153079	ENSMUSG00000037393	Nmur2	Nmu2r	neuromedin U receptor 2	protein-coding
chr17	4626184	4626530	Intergenic	(CACTC)n|Simple_repeat|Simple_repeat	-8623	NR_130984	75117	Mm.429393	NR_130984	ENSMUSG00000116767	4930517M08Rik	-	RIKEN cDNA 4930517M08 gene	ncRNA
chr17	81244610	81245848	Intergenic	L1Md_T|LINE|L1	-180144	NM_028138	72167	Mm.273257	NM_028138	ENSMUSG00000024246	Thumpd2	2810025A12Rik	THUMP domain containing 2	protein-coding
chr8	121578298	121579279	promoter-TSS (NM_133765)	promoter-TSS (NM_133765)	18	NM_133765	76454	Mm.24829	NM_133765	ENSMUSG00000052934	Fbxo31	1110003O08Rik|2310046N15Rik|Fbx14|Fbxo14	F-box protein 31	protein-coding
chrX	148877439	148878488	Intergenic	Intergenic	-4613	NM_001114383	434865	Mm.473681	NM_001114383	ENSMUSG00000079387	Luzp4	-	leucine zipper protein 4	protein-coding
chr12	113155784	113156756	promoter-TSS (NM_134041)	promoter-TSS (NM_134041)	-151	NM_134041	104732	Mm.87616	NM_134041	ENSMUSG00000037466	Tedc1	4930427A07Rik|AA536649|mFLJ00116	tubulin epsilon and delta complex 1	protein-coding
chr14	34708192	34709488	intron (NM_001004436, intron 4 of 18)	L1Md_T|LINE|L1	34912	NM_001301330	218914	Mm.27957	NM_001004436	ENSMUSG00000041408	Wapl	A530089A20Rik|BC037674|DIF-2|FOE|Wapal	WAPL cohesin release factor	protein-coding
chr16	58408077	58408983	promoter-TSS (NM_028523)	promoter-TSS (NM_028523)	-5	NM_001356484	73379	Mm.373589	NM_028523	ENSMUSG00000035107	Dcbld2	1700055P21Rik|AW146002|CLCP1|Esdn	discoidin, CUB and LCCL domain containing 2	protein-coding
chr16	52031090	52032218	5' UTR (NM_001033238, exon 1 of 18)	5' UTR (NM_001033238, exon 1 of 18)	105	NM_001033238	208650	Mm.328206	NM_001033238	ENSMUSG00000022637	Cblb	AI429560|AI851073|Cbl-b	Casitas B-lineage lymphoma b	protein-coding
chr6	37870424	37871604	5' UTR (NM_145076, exon 1 of 19)	5' UTR (NM_145076, exon 1 of 19)	203	NM_145076	21848	Mm.41063	NM_145076	ENSMUSG00000029833	Trim24	A130082H20Rik|AI447469|D430004I05Rik|TIF1|TIF1-alpha|TIF1alpha|Tif1a	tripartite motif-containing 24	protein-coding
chr3	79628381	79629628	promoter-TSS (NM_025794)	promoter-TSS (NM_025794)	-75	NM_029482	75939	Mm.221520	NM_029482	ENSMUSG00000027811	4930579G24Rik	-	RIKEN cDNA 4930579G24 gene	protein-coding
chr9	7763652	7764494	promoter-TSS (NR_152989)	promoter-TSS (NR_152989)	-4	NM_133739	71929	Mm.283293	NM_133739	ENSMUSG00000050912	Tmem123	2310075C12Rik	transmembrane protein 123	protein-coding
chr7	123369586	123370340	promoter-TSS (NM_001122643)	promoter-TSS (NM_001122643)	-48	NM_001122641	70497	Mm.403318	NM_144529	ENSMUSG00000030766	Arhgap17	5730403H17Rik|Nadrin|Nadrin2|Rich1|Wbp15	Rho GTPase activating protein 17	protein-coding
chr7	110061016	110062092	promoter-TSS (NM_009281)	promoter-TSS (NM_009281)	-148	NM_009281	20841	Mm.10815	NM_009281	ENSMUSG00000061079	Zfp143	AA959806|AU015869|D7Ertd805e|KRAB14|SBF|Staf|Zfp79|Zfp80-rs1|Znf143|pHZ-1	zinc finger protein 143	protein-coding
chr17	24351159	24352332	promoter-TSS (NM_013855)	promoter-TSS (NM_013855)	-278	NM_013855	27410	Mm.239470	NM_013855	ENSMUSG00000024130	Abca3	1810036E22Rik|ABC-C|Abc3	ATP-binding cassette, sub-family A (ABC1), member 3	protein-coding
chr4	147124463	147125577	Intergenic	CpG	-56584	NR_045446	71270	Mm.460830	NR_045446	ENSMUSG00000093617	4933438K21Rik	-	RIKEN cDNA 4933438K21 gene	ncRNA
chr11	86484185	86484843	promoter-TSS (NM_029788)	promoter-TSS (NM_029788)	-143	NM_029788	76892	Mm.262707	NM_029788	ENSMUSG00000020521	Rnft1	0610013E23Rik|AV007605	ring finger protein, transmembrane 1	protein-coding
chr1	46448869	46450002	intron (NM_001310335, intron 3 of 64)	L1Md_T|LINE|L1	23917	NM_001310335	100101919	Mm.383402	NM_001310335	ENSMUSG00000101337	Dnah7c	Dnahc7c	dynein, axonemal, heavy chain 7C	protein-coding
chr15	102625035	102625853	promoter-TSS (NM_001310067)	promoter-TSS (NM_001310067)	20	NM_001310066	223922	Mm.208714	NM_146065	ENSMUSG00000099083	Atf7	1110012F10Rik|9430065F09Rik|AI549878|C130020M04Rik	activating transcription factor 7	protein-coding
chr14	13284362	13285070	promoter-TSS (NR_121588)	promoter-TSS (NR_121588)	-64	NM_028052	72003	Mm.317515	NM_028052	ENSMUSG00000056296	Synpr	1500003F20Rik|SPO	synaptoporin	protein-coding
chr17	24527661	24528303	promoter-TSS (NM_001172114)	promoter-TSS (NM_001172114)	-44	NM_001172113	224619	Mm.275150	NM_153792	ENSMUSG00000052752	Traf7	RFWD1	TNF receptor-associated factor 7	protein-coding
chr6	47677422	47678088	Intergenic	RMER12B|LTR|ERVK	-1018	NR_002841	19799		NR_002841		Rn4.5s	-	4.5S RNA	rRNA
chr9	22070565	22071433	promoter-TSS (NR_040406)	promoter-TSS (NR_040406)	-3	NR_040407	100503652	Mm.439941	NR_040406	ENSMUSG00000096981	Gm16845	-	predicted gene, 16845	ncRNA
chr8	20328507	20331524	Intergenic	Intergenic	-32583	NR_030708	547150	Mm.359054	NR_030708	ENSMUSG00000071796	6820431F20Rik	-	cadherin 11 pseudogene	pseudo
chr6	87671819	87672431	promoter-TSS (NM_024251)	promoter-TSS (NM_024251)	43	NM_024251	72103	Mm.31770	NM_024251	ENSMUSG00000030051	Aplf	2010301N04Rik|AI452191	aprataxin and PNKP like factor	protein-coding
chr1	74505560	74506627	promoter-TSS (NM_021383)	promoter-TSS (NM_021383)	33	NM_021383	58184	Mm.291708	NM_021383	ENSMUSG00000026174	Cnot9	2610007F23Rik|AI593551|Fl10|Rqcd1	CCR4-NOT transcription complex, subunit 9	protein-coding
chr6	117692189	117693281	intron (NR_045731, intron 3 of 3)	L1Md_T|LINE|L1	59034	NR_045731	72263	Mm.443289	NR_045731	ENSMUSG00000099869	1700030F04Rik	-	RIKEN cDNA 1700030F04 gene	ncRNA
chr17	3075348	3076446	intron (NR_003519, intron 7 of 7)	intron (NR_003519, intron 7 of 7)	8286	NR_003519	328734	Mm.335641	NR_003519		Pisd-ps2	D030013I16Rik	phosphatidylserine decarboxylase, pseudogene 2	pseudo
chr11	84179275	84180167	Intergenic	CpG	-12245	NM_001037932	628813	Mm.390389	NM_001037932	ENSMUSG00000051452	Gm11437	AI463690	predicted gene 11437	protein-coding
chrX	47435959	47437101	Intergenic	L1Md_T|LINE|L1	456083	NM_053123	93761	Mm.229151	NM_053123	ENSMUSG00000031099	Smarca1	5730494M04Rik|Snf2l	SWI/SNF related, matrix associated, actin dependent regulator of chromatin, subfamily a, member 1	protein-coding
chr7	131487463	131488706	Intergenic	L1Md_T|LINE|L1	-54879	NM_008257	15373	Mm.323562	NM_008257	ENSMUSG00000040148	Hmx3	Nkx-5.1|Nkx5-1|Nkx5.1	H6 homeobox 3	protein-coding
chr12	108835681	108836381	promoter-TSS (NM_181328)	promoter-TSS (NM_181328)	-155	NM_181328	214663	Mm.266264	NM_181328	ENSMUSG00000021265	Slc25a29	C030003J19Rik|CACL|mCACL	solute carrier family 25 (mitochondrial carrier, palmitoylcarnitine transporter), member 29	protein-coding
chr8	122280913	122282139	promoter-TSS (NM_009569)	promoter-TSS (NM_009569)	-615	NM_009569	22761	Mm.3105	NM_009569	ENSMUSG00000049577	Zfpm1	FOG|Fog1	zinc finger protein, multitype 1	protein-coding
chr17	46383283	46384019	promoter-TSS (NM_207671)	promoter-TSS (NM_207671)	-115	NM_021346	57908	Mm.439916	NM_021346	ENSMUSG00000015597	Zfp318	2610034E08Rik|D530032D06Rik|TZF|Znf318	zinc finger protein 318	protein-coding
chr11	103267267	103267939	promoter-TSS (NM_016896)	promoter-TSS (NM_016896)	-202	NM_016896	53859	Mm.158981	NM_016896	ENSMUSG00000020941	Map3k14	Nik|aly	mitogen-activated protein kinase kinase kinase 14	protein-coding
chr18	73571854	73573172	promoter-TSS (NM_001039214)	promoter-TSS (NM_001039214)	-192	NM_001039214	240396	Mm.24131	NM_001039214	ENSMUSG00000037253	Mex3c	A130001D14Rik|BC035207|BM-013|Rkhd2	mex3 RNA binding family member C	protein-coding
chr1	75713873	75715346	Intergenic	L1Md_T|LINE|L1	168147	NM_001357150	20536	Mm.5053	NM_009208	ENSMUSG00000006576	Slc4a3	A930038D23Rik|Ae3	solute carrier family 4 (anion exchanger), member 3	protein-coding
chr4	97630057	97630298	intron (NM_001122952, intron 1 of 10)	intron (NM_001122952, intron 1 of 10)	-45586	NR_015513	319865	Mm.373807	NM_177023		E130114P18Rik	-	RIKEN cDNA E130114P18 gene	ncRNA
chr12	44268753	44269520	promoter-TSS (NM_026164)	promoter-TSS (NM_026164)	-18	NM_026164	67452	Mm.54126	NM_026164	ENSMUSG00000036257	Pnpla8	1200006O19Rik|AI467579|Ipla2(gamma)	patatin-like phospholipase domain containing 8	protein-coding
chr2	30807508	30808211	promoter-TSS (NM_001356434)	promoter-TSS (NM_001356434)	-109	NM_170592	66617	Mm.33167	NM_170592	ENSMUSG00000026857	Ntmt1	2610205E22Rik|AL033331|AL033332|Mettl11a|NTM1A	N-terminal Xaa-Pro-Lys N-methyltransferase 1	protein-coding
chr8	49272697	49273152	Intergenic	Intergenic	-598234	NM_011857	23965	Mm.42191	NM_011857	ENSMUSG00000031561	Tenm3	2610100B16Rik|Odz1|Odz3|Ten-m3|mKIAA1455	teneurin transmembrane protein 3	protein-coding
chr5	45857234	45858174	promoter-TSS (NM_001163073)	promoter-TSS (NM_001163073)	-164	NM_178142	209707	Mm.71498	NM_172153	ENSMUSG00000015882	Lcorl	Mlr1	ligand dependent nuclear receptor corepressor-like	protein-coding
chr17	27325005	27325442	Intergenic	Intergenic	-3162	NR_106075	102466818		NR_106075	ENSMUSG00000099237	Mir7216	Gm27555|mmu-mir-7216	microRNA 7216	ncRNA
chr4	9668685	9669514	promoter-TSS (NM_001177856)	promoter-TSS (NM_001177856)	63	NM_001177856	65973	Mm.222206	NM_023066	ENSMUSG00000028207	Asph	2310005F16Rik|3110001L23Rik|AI848629|AW261690|AW561901|BAH|C79816|cI-37	aspartate-beta-hydroxylase	protein-coding
chr19	7039564	7040480	promoter-TSS (NM_016737)	promoter-TSS (NM_016737)	4	NM_016737	20867	Mm.258633	NM_016737	ENSMUSG00000024966	Stip1	Hop|Sti1|p60	stress-induced phosphoprotein 1	protein-coding
chr7	65644561	65645322	promoter-TSS (NM_172310)	promoter-TSS (NM_172310)	43	NM_172310	272396	Mm.35127	NM_172310	ENSMUSG00000030515	Tarsl2	A530046H20Rik	threonyl-tRNA synthetase-like 2	protein-coding
chr14	32351180	32351754	Intergenic	MLTR11A|LTR|ERVK	29448	NM_001081130	239017	Mm.318302	NM_001081130	ENSMUSG00000021913	Ogdhl	-	oxoglutarate dehydrogenase-like	protein-coding
chr13	48545603	48546856	Intergenic	CpG	-7957	NR_029725	387244		NR_029725	ENSMUSG00000065421	Mirlet7a-1	Let-7a|Mirnlet7a|Mirnlet7a-1|let-7a-1	microRNA let7a-1	ncRNA
chr11	60352395	60353449	promoter-TSS (NM_029044)	promoter-TSS (NM_029044)	-17	NM_001039092	216810	Mm.218875	NM_153080	ENSMUSG00000000538	Tom1l2	2900016I08Rik|A730055F12Rik|AU042072|Srebf1	target of myb1-like 2 (chicken)	protein-coding
chr17	56540505	56541025	Intergenic	ZP3AR|Satellite|Satellite	13622	NR_130128	100504425	Mm.384143	NR_130128	ENSMUSG00000110218	Gm20219	Tincr	predicted gene, 20219	ncRNA
chr2	125247153	125247927	promoter-TSS (NM_023595)	promoter-TSS (NM_023595)	25	NM_023595	110074	Mm.282499	NM_023595	ENSMUSG00000027203	Dut	5031412I06Rik|5133400F09Rik|D2Bwg0749e|Dutp|dUTPase	deoxyuridine triphosphatase	protein-coding
chr10	86778535	86779226	promoter-TSS (NM_175331)	promoter-TSS (NM_175331)	-125	NM_175331	103466	Mm.200446	NM_175331	ENSMUSG00000054027	Nt5dc3	AU040402|AW540062|C630002B14Rik|TU12B1-TY	5'-nucleotidase domain containing 3	protein-coding
chr9	96852949	96853194	intron (NM_001289645, intron 3 of 6)	(TTAGGG)n|Simple_repeat|Simple_repeat	36403	NM_001289646	235534	Mm.233031	NM_153420	ENSMUSG00000043587	Pxylp1	9430094M07Rik|Acpl2|BB177120|C130099A20Rik	2-phosphoxylose phosphatase 1	protein-coding
chr18	86044181	86045081	Intergenic	L1Md_T|LINE|L1	-350321	NM_144946	246317	Mm.329578	NM_144946	ENSMUSG00000050321	Neto1	AI851453|Btcl1|C130005O10Rik	neuropilin (NRP) and tolloid (TLL)-like 1	protein-coding
chr16	37384505	37385385	promoter-TSS (NM_001114611)	promoter-TSS (NM_001114611)	13	NM_172440	207227	Mm.80170	NM_172440	ENSMUSG00000022829	Stxbp5l	9430094L02|A830015P08Rik|LLGL4|T2dm1|t2md1|tomosyn-2	syntaxin binding protein 5-like	protein-coding
chr4	53011702	53012654	intron (NM_001347099, intron 1 of 4)	CpG	298	NM_001347099	66536	Mm.38244	NM_025623	ENSMUSG00000015247	Nipsnap3b	2700063N13Rik|Nipsnap3a	nipsnap homolog 3B	protein-coding
chr7	19164147	19164612	intron (NM_001080815, intron 3 of 13)	intron (NM_001080815, intron 3 of 13)	1748	NM_001080815	381853	Mm.333633	NM_001080815	ENSMUSG00000030406	Gipr	GIP-R|Gm1081|Gm160	gastric inhibitory polypeptide receptor	protein-coding
chr7	25316590	25317272	promoter-TSS (NM_001160400)	promoter-TSS (NM_001160400)	-233	NM_001160400	269878	Mm.38527	NM_001160400	ENSMUSG00000045039	Megf8	AW049492|Egfl4|b2b1702.2Clo|b2b1702Clo|b2b288Clo|m687Ddg|mKIAA0817	multiple EGF-like-domains 8	protein-coding
chr5	73490650	73491315	promoter-TSS (NM_001190733)	promoter-TSS (NM_001190733)	-44	NM_001190733	100737	Mm.220312	NM_178896	ENSMUSG00000051674	Dcun1d4	AI836376	DCN1, defective in cullin neddylation 1, domain containing 4 (S. cerevisiae)	protein-coding
chr6	49367467	49367970	promoter-TSS (NM_001172216)	promoter-TSS (NM_001172216)	-21	NM_001172216	231946	Mm.35199	NM_172727	ENSMUSG00000047115	Fam221a	D330028D13Rik	family with sequence similarity 221, member A	protein-coding
chr4	23656828	23657801	Intergenic	(CTGGGG)n|Simple_repeat|Simple_repeat	-839137	NM_199467	212377	Mm.120919	NM_199467	ENSMUSG00000045751	Mms22l	F730047E07Rik|Gm134	MMS22-like, DNA repair protein	protein-coding
chr7	84689499	84690382	promoter-TSS (NM_001360582)	promoter-TSS (NM_001360582)	17	NM_001360578	65098	Mm.209349	NM_022985	ENSMUSG00000030629	Zfand6	3110005P07Rik|Awp1|Za20d3	zinc finger, AN1-type domain 6	protein-coding
chr5	3987500	3988494	intron (NM_194462, intron 14 of 47)	L1Md_T|LINE|L1	59811	NM_194462	100986	Mm.46044	NM_194462	ENSMUSG00000040407	Akap9	5730481H23Rik|AKAP-9|AKAP450|AW545847|C79026|G1-448-15|PRKA9|mKIAA0803|mei2-5|repro12	A kinase (PRKA) anchor protein (yotiao) 9	protein-coding
chr16	96127435	96128289	promoter-TSS (NM_008251)	promoter-TSS (NM_008251)	-137	NM_008251	15312	Mm.2756	NM_008251	ENSMUSG00000040681	Hmgn1	HMG-14|Hmg14	high mobility group nucleosomal binding domain 1	protein-coding
chr13	99901716	99903304	Intergenic	Intergenic	-1827	NM_013732	27220	Mm.75498	NM_013732	ENSMUSG00000021647	Cartpt	Cart	CART prepropeptide	protein-coding
chr3	134881056	134882185	intron (NM_021382, intron 3 of 4)	L1Md_T|LINE|L1	52613	NM_021382	21338	Mm.103810	NM_021382	ENSMUSG00000028172	Tacr3	Nk3r|Nkr|Tac3r	tachykinin receptor 3	protein-coding
chr7	18997080	18997410	intron (NM_145579, intron 2 of 2)	ZP3AR|Satellite|Satellite	6000	NM_145579	232934	Mm.440069	NM_145579	ENSMUSG00000048481	Mypop	Myodysa|P42pop	Myb-related transcription factor, partner of profilin	protein-coding
chrX	149784053	149784698	promoter-TSS (NM_001198987)	promoter-TSS (NM_001198987)	-104	NM_001114400	434866	Mm.491025	NM_001114400	ENSMUSG00000096834	Gm15127	-	predicted gene 15127	protein-coding
chr14	46309458	46309915	Intergenic	IMPB_01|Satellite|Satellite	-69838	NR_037981	100041724	Mm.383311	NM_001099324	ENSMUSG00000079261	Gm15217	-	predicted gene 15217	ncRNA
chr7	19227757	19229077	promoter-TSS (NM_207525)	promoter-TSS (NM_207525)	28	NM_207525	403187	Mm.239583	NM_207525	ENSMUSG00000052214	Opa3	D630048P19Rik|Gm1425|Gm472	optic atrophy 3	protein-coding
chr8	25784986	25785823	promoter-TSS (NM_026032)	promoter-TSS (NM_026032)	-187	NM_026032	67207	Mm.30198	NM_026032	ENSMUSG00000037296	Lsm1	2810025O06Rik|CASM	LSM1 homolog, mRNA degradation associated	protein-coding
chr4	135272123	135273169	5' UTR (NM_013885, exon 1 of 6)	5' UTR (NM_013885, exon 1 of 6)	114	NM_013885	29876	Mm.257765	NM_013885	ENSMUSG00000037242	Clic4	D0Jmb3|TU-74|mc3s5|mtCLIC	chloride intracellular channel 4 (mitochondrial)	protein-coding
chr2	100546469	100547673	Intergenic	L1Md_T|LINE|L1	1073975	NM_001362687	68170	Mm.31263	NM_026592	ENSMUSG00000027165	B230118H07Rik	NWC	RIKEN cDNA B230118H07 gene	protein-coding
chr11	32642272	32643149	5' UTR (NM_001271349, exon 1 of 12)	5' UTR (NM_001271349, exon 1 of 12)	155	NM_001271347	103583	Mm.28017	NM_134015	ENSMUSG00000020271	Fbxw11	2310065A07Rik|AA536858|BTRC2|BTRCP2|Fbxw1b|HOS	F-box and WD-40 domain protein 11	protein-coding
chr2	73386131	73386956	promoter-TSS (NM_001190297)	promoter-TSS (NM_001190297)	-63	NM_001190297	68526	Mm.451014	NM_001080707	ENSMUSG00000041762	Gpr155	1110017O10Rik|DEPDC3|F730029F15Rik|PGR22	G protein-coupled receptor 155	protein-coding
chr3	96044542	96045006	intron (NM_013841, intron 7 of 14)	intron (NM_013841, intron 7 of 14)	13681	NM_013841	22365	Mm.263185	NM_013841	ENSMUSG00000015747	Vps45	AI462172|AW554165|mVps45	vacuolar protein sorting 45	protein-coding
chr8	123041641	123042864	promoter-TSS (NR_037865)	promoter-TSS (NR_037865)	32	NR_037865	77087	Mm.31567	NM_001081379	ENSMUSG00000035569	Ankrd11	2410104C19Rik|3010027A04Rik|6330578C09Rik|9530048I21Rik|AA930108|Gm176|Yod	ankyrin repeat domain 11	protein-coding
chr8	71272152	71272952	promoter-TSS (NM_001142323)	promoter-TSS (NM_001142323)	38	NM_001363402	76478	Mm.27355	NM_029621	ENSMUSG00000035439	Haus8	2410004L22Rik|Hice1	4HAUS augmin-like complex, subunit 8	protein-coding
chr15	5116243	5116845	promoter-TSS (NM_026069)	promoter-TSS (NM_026069)	-69	NM_026069	67281	Mm.10474	NM_026069	ENSMUSG00000041841	Rpl37	3110005M08Rik	ribosomal protein L37	protein-coding
chr4	62593824	62594045	intron (NM_019492, intron 3 of 19)	intron (NM_019492, intron 3 of 19)	-25738	NM_134257	50780	Mm.286753	NM_019492	ENSMUSG00000059810	Rgs3	4930506N09Rik|C2PA-RGS3|C2pa|PDZ-RGS3|RGS3S	regulator of G-protein signaling 3	protein-coding
chr3	135437737	135439494	promoter-TSS (NM_025356)	promoter-TSS (NM_025356)	50	NR_030689	319587	Mm.358971	NR_030689	ENSMUSG00000097032	4930539J05Rik	8030475D13Rik	RIKEN cDNA 4930539J05 gene	ncRNA
chr5	45669436	45670124	promoter-TSS (NR_073433)	promoter-TSS (NR_073433)	-72	NR_073433	69788	Mm.381492	NR_073433	ENSMUSG00000104986	1600023N17Rik	AV119442	RIKEN cDNA 1600023N17 gene	ncRNA
chr4	47352637	47353832	promoter-TSS (NM_009370)	promoter-TSS (NM_009370)	12	NM_009370	21812	Mm.197552	NM_009370	ENSMUSG00000007613	Tgfbr1	ALK5|AU017191|Alk-5|ESK2|TGFR-1|TbetaR-I|TbetaRI	transforming growth factor, beta receptor I	protein-coding
chr8	105826995	105827779	promoter-TSS (NM_024445)	promoter-TSS (NM_024445)	-179	NM_145824	74334	Mm.4206	NM_145824	ENSMUSG00000037415	Ranbp10	4432417N03Rik	RAN binding protein 10	protein-coding
chr7	34815782	34816236	Intergenic	ZP3AR|Satellite|Satellite	-3298	NM_175140	68947	Mm.29380	NM_175140	ENSMUSG00000060402	Chst8	1500011J21Rik|AI426009	carbohydrate sulfotransferase 8	protein-coding
chr6	63015231	63017056	Intergenic	L1Md_T|LINE|L1	-239863	NM_001370966
chr15	81925809	81926574	promoter-TSS (NM_030229)	promoter-TSS (NM_030229)	22	NM_030229	78929	Mm.215115	NM_030229	ENSMUSG00000022476	Polr3h	5031409G22Rik|RPC8	polymerase (RNA) III (DNA directed) polypeptide H	protein-coding
chr18	56562031	56562664	promoter-TSS (NM_001162989)	promoter-TSS (NM_001162989)	-49	NM_138600	110695	Mm.30250	NM_138600	ENSMUSG00000053644	Aldh7a1	Atq1|D18Wsu181e	aldehyde dehydrogenase family 7, member A1	protein-coding
chr8	19979874	19980648	intron (NM_001270553, intron 6 of 9).2	CpG	250685	NM_001270553	100861668	Mm.491087	NM_001270553	ENSMUSG00000095294	Gm21119	-	predicted gene, 21119	protein-coding
chr6	71831154	71831940	intron (NM_001362137, intron 1 of 13)	CpG	227	NM_001362137	76614	Mm.235123	NM_029673	ENSMUSG00000052337	Immt	1700082C19Rik|D830041H16Rik|HMP|Micos60|P87|P87/89|P89	inner membrane protein, mitochondrial	protein-coding
chr9	14275981	14276988	5' UTR (NM_030261, exon 1 of 10)	5' UTR (NM_030261, exon 1 of 10)	183	NM_030261	75747	Mm.325126	NM_030261	ENSMUSG00000032009	Sesn3	5630400E15Rik|BC003348|SEST3	sestrin 3	protein-coding
chr6	114511189	114512011	Intergenic	IMPB_01|Satellite|Satellite	53078	NM_001317124	15465	Mm.333327	NM_008285	ENSMUSG00000053004	Hrh1	Bphs|H1R|HH1R|Hir	histamine receptor H1	protein-coding
chr7	27494688	27495125	Intergenic	ZP3AR|Satellite|Satellite	-4418	NM_019412	19153	Mm.10119	NM_019412	ENSMUSG00000053198	Prx	L-Periaxin	periaxin	protein-coding
chr3	41082804	41083772	promoter-TSS (NM_027558)	promoter-TSS (NM_027558)	-242	NM_027558	70804	Mm.40321	NM_027558	ENSMUSG00000049940	Pgrmc2	4631434O19Rik|5730409G06Rik|DG6|PMBP	progesterone receptor membrane component 2	protein-coding
chr6	47650276	47652071	Intergenic	Intergenic	3921	NR_002841	19799		NR_002841		Rn4.5s	-	4.5S RNA	rRNA
chr11	35769252	35770016	5' UTR (NM_145962, exon 1 of 7)	5' UTR (NM_145962, exon 1 of 7)	139	NM_145962	211347	Mm.255044	NM_145962	ENSMUSG00000018846	Pank3	-	pantothenate kinase 3	protein-coding
chr11	106779083	106780136	promoter-TSS (NM_001353435)	promoter-TSS (NM_001353435)	-72	NR_148431	50776	Mm.859	NM_015810	ENSMUSG00000020718	Polg2	mtPolB|p55|polG-beta	polymerase (DNA directed), gamma 2, accessory subunit	protein-coding
chr3	106721496	106722294	5' UTR (NM_001039488, exon 1 of 4)	5' UTR (NM_001039488, exon 1 of 4)	213	NM_001039488	321000	Mm.259638	NM_028081	ENSMUSG00000056260	Lrif1	2010012G17Rik|4933421E11Rik|AI450568	ligand dependent nuclear receptor interacting factor 1	protein-coding
chr16	22439301	22440010	promoter-TSS (NM_023794)	promoter-TSS (NM_023794)	-85	NM_023794	104156	Mm.155708	NM_023794	ENSMUSG00000013089	Etv5	1110005E01Rik|8430401F14Rik|ERM	ets variant 5	protein-coding
chr1	51477744	51478712	5' UTR (NM_028696, exon 1 of 6)	5' UTR (NM_028696, exon 1 of 6)	171	NM_001310549	109019	Mm.196290	NM_028696	ENSMUSG00000026107	Nabp1	4930434H03Rik|4930442A21Rik|4930488J04Rik|4933440J18Rik|5830411E10Rik|AI852561|Nbp1|Obfc2a|Ssb2	nucleic acid binding protein 1	protein-coding
chrY	5892679	5893261	Intergenic	L1Md_F|LINE|L1	1274807	NM_001101623	100040160	Mm.482062	NM_001101623	ENSMUSG00000094081	Gm20826	-	predicted gene, 20826	protein-coding
chr14	35432452	35433609	intron (NM_008166, intron 8 of 15)	L1Md_T|LINE|L1	378948	NM_001033766	239036	Mm.239970	NM_001033766	ENSMUSG00000041068	4930596D02Rik	-	RIKEN cDNA 4930596D02 gene	protein-coding
chr15	44618761	44619781	promoter-TSS (NM_019480)	promoter-TSS (NM_019480)	44	NM_001357690	55960	Mm.287896	NM_019480	ENSMUSG00000022339	Ebag9	AI835379|Rcas1	estrogen receptor-binding fragment-associated gene 9	protein-coding
chr13	29986040	29986693	promoter-TSS (NM_010093)	promoter-TSS (NM_010093)	-303	NM_010093	13557	Mm.268356	NM_010093	ENSMUSG00000016477	E2f3	E2F3b|E2f3a	E2F transcription factor 3	protein-coding
chr11	6444065	6444764	promoter-TSS (NM_029938)	promoter-TSS (NM_029938)	29	NM_001347064	77605	Mm.27624	NM_029938	ENSMUSG00000041126	H2afv	C530002L11Rik|H2A.Z2|H2a.z-2|H2av|Tg(Wnt1-cre)11Rth|Wnt1-Cre|Wnt1::Cre|Wnt1cre	H2A histone family, member V	protein-coding
chr1	9545117	9546567	exon (NM_021511, exon 1 of 1)	exon (NM_021511, exon 1 of 1)	434	NM_021511	59014	Mm.29061	NM_021511	ENSMUSG00000061024	Rrs1	5730466A07Rik|AA415037|D1Ertd701e|Rrr	ribosome biogenesis regulator 1	protein-coding
chr19	3575316	3576178	promoter-TSS (NM_028999)	promoter-TSS (NM_028999)	2	NM_001360429	52036	Mm.284686	NM_028999	ENSMUSG00000024908	Ppp6r3	4930528G08Rik|9130026N02Rik|D19Bwg1430e|D19Ertd703e|Pp6r3|Ppcs3|Pptcs3|Sapl|Saps3|mKIAA1558	protein phosphatase 6, regulatory subunit 3	protein-coding
chr17	74527853	74528663	promoter-TSS (NM_007566)	promoter-TSS (NM_007566)	-37	NM_007566	12211	Mm.442564	NM_007566	ENSMUSG00000024073	Birc6	A430032G04Rik|A430040A19Rik|AA501170|Bruce|D630005A10Rik|mKIAA1289	baculoviral IAP repeat-containing 6	protein-coding
chr8	22060004	22060810	promoter-TSS (NM_007511)	promoter-TSS (NM_007511)	-314	NM_001243161	207958	Mm.267439	NM_183142	ENSMUSG00000063362	Alg11	AI849156|AW492253|B230397C21|Mmat-4(5)	asparagine-linked glycosylation 11 (alpha-1,2-mannosyltransferase)	protein-coding
chr13	96542369	96543593	promoter-TSS (NM_012048)	promoter-TSS (NM_012048)	246	NM_001164222	68018	Mm.24125	NM_023420	ENSMUSG00000021669	Col4a3bp	2810404O15Rik|9230101K08Rik|AU016711|CERT|GPBP	collagen, type IV, alpha 3 (Goodpasture antigen) binding protein	protein-coding
chr8	84846610	84847351	promoter-TSS (NM_007591)	promoter-TSS (NM_007591)	-49	NM_007591	12317	Mm.1971	NM_007591	ENSMUSG00000003814	Calr	CRT|Calregulin	calreticulin	protein-coding
chr7	19867204	19867670	Intergenic	ZP3AR|Satellite|Satellite	-6138	NM_001033419	330483	Mm.260192	NM_001033419	ENSMUSG00000014686	Ceacam16	Gm769	carcinoembryonic antigen-related cell adhesion molecule 16	protein-coding
chr7	127477748	127479223	promoter-TSS (NM_010183)	promoter-TSS (NM_010183)	-473	NM_010183	14123	Mm.323505	NM_010183	ENSMUSG00000042423	Fbrs	Fbs|Fbs1	fibrosin	protein-coding
chr8	4677349	4680152	Intergenic	Intergenic	65410	NM_001368404	233987	Mm.102799	NM_145591	ENSMUSG00000058748	Zfp958	-	zinc finger protein 958	protein-coding
chr11	49243762	49244455	promoter-TSS (NM_010794)	promoter-TSS (NM_010794)	-83	NM_010794	17308	Mm.196933	NM_010794	ENSMUSG00000020346	Mgat1	Mgat-1	mannoside acetylglucosaminyltransferase 1	protein-coding
chr12	87387973	87388696	promoter-TSS (NM_011479)	promoter-TSS (NM_011479)	21	NM_011479	20773	Mm.565	NM_011479	ENSMUSG00000021036	Sptlc2	LCB2|LCB2a|Spt2	serine palmitoyltransferase, long chain base subunit 2	protein-coding
chr7	90475896	90476559	promoter-TSS (NM_026734)	promoter-TSS (NM_026734)	-232	NM_026734	68472	Mm.289791	NM_026734	ENSMUSG00000030614	Tmem126b	1110001A23Rik	transmembrane protein 126B	protein-coding
chrX	123705134	123706225	Intergenic	Intergenic	188074	NR_152851	100113394	Mm.435429	NR_152851		Astx5	Astx|Gm14948	amplified spermatogenic transcripts X encoded 5	ncRNA
chr14	118817271	118818244	intron (NM_001160097, intron 1 of 3)	ORR1D1|LTR|ERVL-MaLR	29886	NM_001160098	58187	Mm.390755	NM_021386	ENSMUSG00000022132	Cldn10	6720456I16Rik|Cldn10a|Cldn10b|D14Ertd728e	claudin 10	protein-coding
chr13	12394881	12395693	promoter-TSS (NM_144835)	promoter-TSS (NM_144835)	-88	NM_144835	217995	Mm.171186	NM_144835	ENSMUSG00000050244	Heatr1	AA517551|B130016L12Rik|BC019693	HEAT repeat containing 1	protein-coding
chr8	70820062	70820590	intron (NM_008353, intron 15 of 15)	intron (NM_008353, intron 15 of 15)	11877	NM_008353	16161	Mm.731	NM_008353	ENSMUSG00000000791	Il12rb1	CD212|IL-12R[b]	interleukin 12 receptor, beta 1	protein-coding
chr8	49573734	49574749	Intergenic	L1Md_T|LINE|L1	-793871	NR_046067	100039954	Mm.400419	NR_046067	ENSMUSG00000110281	Gm2516	-	predicted gene 2516	ncRNA
chr5	134107069	134107795	intron (NM_030719, intron 1 of 8)	ZP3AR|Satellite|Satellite	7684	NM_030719	80909	Mm.45218	NM_030719	ENSMUSG00000015944	Castor2	7530428J21Rik|AW742413|Gats|Gatsl1|Gatsl2	cytosolic arginine sensor for mTORC1 subunit 2	protein-coding
chr7	28693198	28693981	exon (NM_001163702, exon 1 of 5)	exon (NM_001163702, exon 1 of 5)	445	NM_001163702	233040	Mm.116116	NM_207238	ENSMUSG00000037463	Fbxo27	E130008B10Rik|FBG5|Gm161	F-box protein 27	protein-coding
chr9	13826679	13828205	promoter-TSS (NM_001310721)	promoter-TSS (NM_001310721)	-274	NM_001358259	72826	Mm.246174	NM_176836	ENSMUSG00000037808	Fam76b	2810485I05Rik|C78303	family with sequence similarity 76, member B	protein-coding
chr1	183161725	183162522	intron (NM_001278219, intron 2 of 8)	(CA)n|Simple_repeat|Simple_repeat	-14566	NM_001278220	68897	Mm.327216	NM_026866	ENSMUSG00000030768	Disp1	1190008H24Rik|DispA	dispatched RND transporter family member 1	protein-coding
chr4	72200086	72201413	promoter-TSS (NR_027923)	promoter-TSS (NR_027923)	144	NM_001285530	21885	Mm.278444	NM_011599	ENSMUSG00000008305	Tle1	C230057C06Rik|Estm14|Grg-1|Grg1|Tle4l	transducin-like enhancer of split 1	protein-coding
chr1	161034390	161035530	promoter-TSS (NR_151479)	promoter-TSS (NR_151479)	44	NR_153813	14455	Mm.270065	NR_002840	ENSMUSG00000053332	Gas5	Gas-5|Mir5117|Snhg2	growth arrest specific 5	ncRNA
chr9	4308972	4310175	promoter-TSS (NM_001326359)	promoter-TSS (NM_001326359)	-79	NR_136941	67618	Mm.33970	NM_026276	ENSMUSG00000025894	Aasdhppt	2010309J24Rik|2810407B07Rik|AASD-PPT|CGI-80|LYS2|LYS5	aminoadipate-semialdehyde dehydrogenase-phosphopantetheinyl transferase	protein-coding
chr10	43562608	43563189	Intergenic	(CGAGG)n|Simple_repeat|Simple_repeat	-16271	NM_009846	12484	Mm.29742	NM_009846	ENSMUSG00000047139	Cd24a	Cd24|HSA|Ly-52|nectadrin	CD24a antigen	protein-coding
chr17	33649539	33650349	exon (NM_029804, exon 14 of 16)	exon (NM_029804, exon 14 of 16)	11849	NR_028279	378460	Mm.272606	NM_001002842	ENSMUSG00000032739	Pram1	AY665714	PML-RAR alpha-regulated adaptor molecule 1	protein-coding
chr3	103102400	103103053	Intergenic	CpG	-24830	NM_177857	329727	Mm.293641	NM_177857	ENSMUSG00000007379	Dennd2c	A930010I20Rik	DENN/MADD domain containing 2C	protein-coding
chr14	19311306	19312365	Intergenic	Intergenic	290752	NM_001024706	432825	Mm.327147	NM_001024706	ENSMUSG00000095024	Gm5458	EG432825	predicted gene 5458	protein-coding
chr16	5013306	5013843	promoter-TSS (NM_133185)	promoter-TSS (NM_133185)	-21	NM_133185	66049	Mm.27792	NM_133185	ENSMUSG00000022540	Rogdi	0610011C19Rik|AU020118|C76152|Lzf	rogdi homolog	protein-coding
chr14	24323193	24324248	Intergenic	L1Md_T|LINE|L1	30356	NM_001033214	105418	Mm.2077	NM_001033214	ENSMUSG00000038925	E330034G19Rik	AA415275|Zpac	RIKEN cDNA E330034G19 gene	protein-coding
chr1	4559692	4560971	Intergenic	L1Md_T|LINE|L1	-62977	NM_001289467	20671	Mm.279103	NM_011441	ENSMUSG00000025902	Sox17	-	SRY (sex determining region Y)-box 17	protein-coding
chr11	94210911	94212383	5' UTR (NM_009427, exon 1 of 2)	5' UTR (NM_009427, exon 1 of 2)	193	NM_009427	22057	Mm.259673	NM_009427	ENSMUSG00000037573	Tob1	Tob|Trob	transducer of ErbB-2.1	protein-coding
chr7	92741183	92741715	promoter-TSS (NM_029494)	promoter-TSS (NM_029494)	10	NR_015510	666737	Mm.473620	NR_015510	ENSMUSG00000074024	4632427E13Rik	AU015482	RIKEN cDNA 4632427E13 gene	ncRNA
chr5	92674991	92675663	promoter-TSS (NM_001360018)	promoter-TSS (NM_001360018)	-56	NM_001360020	320696	Mm.209991	NM_177230	ENSMUSG00000050050	Ccdc158	4932413O14Rik	coiled-coil domain containing 158	protein-coding
chr6	13677069	13678385	exon (NM_175312, exon 1 of 5)	exon (NM_175312, exon 1 of 5)	239	NM_175312	101148	Mm.354863	NM_175312	ENSMUSG00000042742	Bmt2	AI666701|B630005N14Rik	base methyltransferase of 25S rRNA 2	protein-coding
chr4	106560377	106561618	promoter-TSS (NM_053272)	promoter-TSS (NM_053272)	-41	NM_053272	74754	Mm.133370	NM_053272	ENSMUSG00000034926	Dhcr24	2310076D10Rik|5830417J06Rik|mKIAA0018	24-dehydrocholesterol reductase	protein-coding
chr18	6764806	6765479	promoter-TSS (NM_001278447)	promoter-TSS (NM_001278447)	-25	NM_001278447	19330	Mm.132802	NM_181070	ENSMUSG00000073639	Rab18	AA959686	RAB18, member RAS oncogene family	protein-coding
chr19	8819187	8820424	promoter-TSS (NM_027412)	promoter-TSS (NM_027412)	404	NM_001081196	68693	Mm.476519	NM_001081196	ENSMUSG00000071659	Hnrnpul2	1110031M08Rik|AI465155|Hnrpul2	heterogeneous nuclear ribonucleoprotein U-like 2	protein-coding
chr14	38542203	38543281	intron (NM_001190188, intron 3 of 8)	L1Md_T|LINE|L1	-355560	NR_045713	75170	Mm.372967	NR_045713	ENSMUSG00000093528	Nrg3os	4930529F24Rik	neuregulin 3, opposite strand	ncRNA
chr4	126753404	126754011	promoter-TSS (NM_011986)	promoter-TSS (NM_011986)	58	NM_001355412	26562	Mm.206206	NM_011986	ENSMUSG00000028833	Ncdn	AU042419|MMS10-AE|Ms10ae|mKIAA0607|norbin	neurochondrin	protein-coding
chr14	33446935	33447575	promoter-TSS (NM_001310454)	promoter-TSS (NM_001310454)	-97	NM_001310454	26419	Mm.21495	NM_016700	ENSMUSG00000021936	Mapk8	AI849689|JNK|JNK1|Prkm8|SAPK1	mitogen-activated protein kinase 8	protein-coding
chr7	44986226	44987120	promoter-TSS (NM_001252477)	promoter-TSS (NM_001252477)	-227	NR_045266	100502630	Mm.490013	NR_045266	ENSMUSG00000087138	Gm15545	-	predicted gene 15545	ncRNA
chr12	24650773	24652376	intron (NM_178357, intron 1 of 3)	CpG	203	NM_178357	194655	Mm.9616	NM_178357	ENSMUSG00000020653	Klf11	9830142A17|D12Ertd427e|Tieg2|Tieg2b|Tieg3	Kruppel-like factor 11	protein-coding
chr14	72915369	72916590	Intergenic	L1Md_T|LINE|L1	-109624	NR_027860	668489	Mm.158324	NR_027860		Gm9199	EG668489	glycine cleavage system protein H (aminomethyl carrier) pseudogene	pseudo
chrX	170018579	170019393	Intergenic	CpG	-40069	NR_029457	654820	Mm.34441	NM_001039559	ENSMUSG00000072844	G530011O06Rik	-	RIKEN cDNA G530011O06 gene	ncRNA
chr19	43674674	43675582	promoter-TSS (NR_045645)	promoter-TSS (NR_045645)	-50	NR_045645	100502982	Mm.313570	NR_045645	ENSMUSG00000117698	BC037704	-	cDNA sequence BC037704	ncRNA
chr4	155563126	155564233	promoter-TSS (NM_001159637)	promoter-TSS (NM_001159637)	-136	NM_001355599	192185	Mm.28347	NM_138671	ENSMUSG00000029063	Nadk	4432404C02Rik|BC004012	NAD kinase	protein-coding
chr5	25529366	25530172	promoter-TSS (NR_027388)	promoter-TSS (NR_027388)	-249	NR_027388	73571	Mm.105263	NR_027388	ENSMUSG00000101856	1700096K18Rik	-	RIKEN cDNA 1700096K18 gene	ncRNA
chr4	67916099	67916846	Intergenic	L1Md_T|LINE|L1	405489	NR_151548	102633975		NR_151548		Gm12911	-	predicted gene 12911	ncRNA
chr7	139212949	139213570	promoter-TSS (NM_001162540)	promoter-TSS (NM_001162540)	-16	NM_001143755	76612	Mm.17757	NM_027164	ENSMUSG00000015980	Lrrc27	1700071K18Rik|2310044E02Rik	leucine rich repeat containing 27	protein-coding
chr11	95336663	95337096	promoter-TSS (NM_172543)	promoter-TSS (NM_172543)	-139	NM_172543	215512	Mm.262113	NM_172543	ENSMUSG00000038893	Fam117a	5730593F17Rik|AW548096	family with sequence similarity 117, member A	protein-coding
chr13	8885483	8886178	5' UTR (NM_145360, exon 1 of 5)	5' UTR (NM_145360, exon 1 of 5)	224	NM_145360	319554	Mm.29847	NM_145360	ENSMUSG00000058258	Idi1	4832416K17Rik|IPPI1	isopentenyl-diphosphate delta isomerase	protein-coding
chr7	19131456	19131911	intron (NM_175530, intron 1 of 1)	CpG	11824	NM_175530	243867	Mm.230830	NM_175530	ENSMUSG00000050428	Fbxo46	20D7-FC4|4932704E22Rik|Fbxo34l	F-box protein 46	protein-coding
chrX	114266679	114267895	Intergenic	L1Md_T|LINE|L1	-207046	NM_001290477	237010	Mm.132583	NM_172781	ENSMUSG00000025597	Klhl4	B130014A11|C130018J01Rik	kelch-like 4	protein-coding
chr11	43681627	43682453	promoter-TSS (NM_001164231)	promoter-TSS (NM_001164231)	42	NM_001363142	70802	Mm.397449	NM_027557	ENSMUSG00000044950	Pwwp2a	4631424J17Rik|AI891583|AU024105|D930040F23Rik	PWWP domain containing 2A	protein-coding
chr6	125285786	125286392	promoter-TSS (NM_009446)	promoter-TSS (NM_009446)	-8	NM_009446	22144	Mm.270295	NM_009446	ENSMUSG00000067702	Tuba3a	AI528779|M[a]3|Tuba3	tubulin, alpha 3A	protein-coding
chr4	129334818	129335991	promoter-TSS (NM_009030)	promoter-TSS (NM_009030)	-34	NM_009030	19646	Mm.12145	NM_009030	ENSMUSG00000057236	Rbbp4	RBAP48|mRbAp48	retinoblastoma binding protein 4, chromatin remodeling factor	protein-coding
chr13	9093483	9094551	5' UTR (NM_172585, exon 1 of 18)	5' UTR (NM_172585, exon 1 of 18)	136	NM_172585	217980	Mm.234944	NM_172585	ENSMUSG00000033499	Larp4b	A630096F19|AI256361|D13Wsu64e|Larp5	La ribonucleoprotein domain family, member 4B	protein-coding
chr16	3383873	3385026	Intergenic	L1Md_T|LINE|L1	-207949	NM_146860	258859	Mm.377723	NM_146860	ENSMUSG00000051003	Olfr161	MOR131-1|OR912-47M6	olfactory receptor 161	protein-coding
chr17	8147564	8148405	promoter-TSS (NM_001364953)	promoter-TSS (NM_001364953)	-152	NM_026611	68195	Mm.181237	NM_026611	ENSMUSG00000094724	Rnaset2b	0610007O07Rik|4833423A10Rik|4930532K22Rik|C79750|RNASE6PL|Rnaset2	ribonuclease T2B	protein-coding
chr5	141088117	141088613	Intergenic	ZP3AR|Satellite|Satellite	-87769	NM_175362	108723	Mm.46187	NM_175362	ENSMUSG00000036526	Card11	0610008L17Rik|2410011D02Rik|BIMP3|CARMA1	caspase recruitment domain family, member 11	protein-coding
chr6	146861800	146862064	intron (NM_027059, intron 6 of 9)	intron (NM_027059, intron 6 of 9)	11822	NM_027059	69371	Mm.252733	NM_027059	ENSMUSG00000030292	Smco2	1700023A16Rik	single-pass membrane protein with coiled-coil domains 2	protein-coding
chr13	101767797	101768730	promoter-TSS (NM_001077495)	promoter-TSS (NM_001077495)	-46	NM_001077495	18708	Mm.259333	NM_001024955	ENSMUSG00000041417	Pik3r1	PI3K|p50alpha|p55alpha|p85alpha	phosphoinositide-3-kinase regulatory subunit 1	protein-coding
chr19	42128837	42129452	promoter-TSS (NM_027106)	promoter-TSS (NM_027106)	-151	NM_027106	69534	Mm.30060	NM_027106	ENSMUSG00000018821	Avpi1	2310008N12Rik|AA410041|VIT32|esu|mVIT32	arginine vasopressin-induced 1	protein-coding
chr15	44427436	44428473	promoter-TSS (NM_175009)	promoter-TSS (NM_175009)	-157	NM_175009	223527	Mm.291828	NM_175009	ENSMUSG00000022338	Eny2	1810057B09Rik|6720481I12|DC6|Ey2	ENY2 transcription and export complex 2 subunit	protein-coding
chr12	59011657	59012236	promoter-TSS (NM_009147)	promoter-TSS (NM_009147)	71	NM_009147	20334	Mm.491137	NM_009147	ENSMUSG00000020986	Sec23a	Msec23|Sec23r	SEC23 homolog A, COPII coat complex component	protein-coding
chr16	84941750	84942900	Intergenic	L1Md_T|LINE|L1	-29886	NR_045889	100038614	Mm.441351	NR_045889	ENSMUSG00000115518	Gm10791	-	predicted gene 10791	ncRNA
chr8	8836103	8836518	Intergenic	(CCCCAG)n|Simple_repeat|Simple_repeat	-145773	NM_176849	234023	Mm.251655	NM_176849	ENSMUSG00000040459	Arglu1	9430010O03Rik|C130008N12	arginine and glutamate rich 1	protein-coding
chr6	124828842	124830407	promoter-TSS (NM_001326594)	promoter-TSS (NM_001326594)	-140	NM_013700	22225	Mm.3571	NM_013700	ENSMUSG00000038429	Usp5	AA407472|ISOT|ISOT-1|Ucht	ubiquitin specific peptidase 5 (isopeptidase T)	protein-coding
chr9	103364750	103366172	promoter-TSS (NM_001134427)	promoter-TSS (NM_001134427)	319	NM_175565	321022	Mm.261025	NM_175565	ENSMUSG00000032803	Cdv3	2510010F10Rik|C230084J24Rik|C79446|TPP36	carnitine deficiency-associated gene expressed in ventricle 3	protein-coding
chr13	107890059	107891038	promoter-TSS (NM_145456)	promoter-TSS (NM_145456)	-484	NM_145456	67263	Mm.490418	NM_145456		Zswim6	2900036G02Rik|mKIAA1577	zinc finger SWIM-type containing 6	protein-coding
chr1	114557359	114558651	Intergenic	L1Md_T|LINE|L1	-1126732	NM_001077425	636808	Mm.101576	NM_001077425	ENSMUSG00000070695	Cntnap5a	Caspr5-1|EG636808	contactin associated protein-like 5A	protein-coding
chr17	3557411	3558139	promoter-TSS (NR_045303)	promoter-TSS (NR_045303)	-20	NM_146074	224481	Mm.226554	NM_146074	ENSMUSG00000036983	Tfb1m	AI429207|mtTFB1	transcription factor B1, mitochondrial	protein-coding
chr7	141221651	141222273	promoter-TSS (NR_029793)	promoter-TSS (NR_029793)	-469	NR_029793	387206		NR_029793	ENSMUSG00000065551	Mir210	Mirn210|mir-210|mmu-mir-210	microRNA 210	ncRNA
chr7	109985937	109986509	promoter-TSS (NM_153525)	promoter-TSS (NM_153525)	7	NM_153525	233724	Mm.43212	NM_153525	ENSMUSG00000047554	Tmem41b	1500015G02Rik|1500031M19Rik|AU018901|D7Ertd70e|D7Ertd743e	transmembrane protein 41B	protein-coding
chrX	123247250	123248341	Intergenic	Intergenic	-34492	NR_152852	100302634	Mm.417665	NR_152852	ENSMUSG00000095005	Astx6	Gm14949	amplified spermatogenic transcripts X encoded 6	ncRNA
chr15	63997650	63998610	promoter-TSS (NM_001360035)	promoter-TSS (NM_001360035)	-64	NM_001360035	223601	Mm.246108	NM_144846	ENSMUSG00000022378	Fam49b	0910001A06Rik|AW122079	family with sequence similarity 49, member B	protein-coding
chrX	74864498	74865662	Intergenic	L1Md_T|LINE|L1	27884	NM_001081670	546325	Mm.436644	NM_001081670	ENSMUSG00000079531	Gm5936	EG546325	predicted gene 5936	protein-coding
chr11	69671239	69672702	intron (NM_144958, intron 1 of 10)	CpG	453	NM_144958	13681	Mm.26680	NM_144958	ENSMUSG00000059796	Eif4a1	BM-010|Ddx2a|Eif4	eukaryotic translation initiation factor 4A1	protein-coding
chr6	28479993	28480640	promoter-TSS (NM_019776)	promoter-TSS (NM_019776)	-32	NM_019776	56463	Mm.439987	NM_019776	ENSMUSG00000001424	Snd1	AL033314|Tudor-SN	staphylococcal nuclease and tudor domain containing 1	protein-coding
chr5	134103919	134104679	intron (NM_030719, intron 1 of 8)	ZP3AR|Satellite|Satellite	4551	NM_030719	80909	Mm.45218	NM_030719	ENSMUSG00000015944	Castor2	7530428J21Rik|AW742413|Gats|Gatsl1|Gatsl2	cytosolic arginine sensor for mTORC1 subunit 2	protein-coding
chr9	25151102	25152189	5' UTR (NM_020586, exon 1 of 8)	5' UTR (NM_020586, exon 1 of 8)	136	NM_020586	80517	Mm.142843	NM_020586	ENSMUSG00000008429	Herpud2	5031400M07Rik|AB041580	HERPUD family member 2	protein-coding
chr11	74831440	74833003	intron (NM_010813, intron 1 of 5)	CpG-2219	1297	NM_010813	17428	Mm.3759	NM_010813	ENSMUSG00000000282	Mnt	Rox|bHLHd3	max binding protein	protein-coding
chr6	42122823	42123877	Intergenic	L1Md_T|LINE|L1	-17586	NM_181275	353148	Mm.377887	NM_181275	ENSMUSG00000047102	Tas2r139	Tas2r39|mt2r34	taste receptor, type 2, member 139	protein-coding
chr16	89329241	89330766	Intergenic	L1Md_T|LINE|L1	73771	NM_028621	170656	Mm.46109	NM_028621	ENSMUSG00000058368	Krtap21-1	1110017B05Rik|AI506979|KAP21.1|Krtap16-7	keratin associated protein 21-1	protein-coding
chr17	26138163	26139099	promoter-TSS (NM_009733)	promoter-TSS (NM_009733)	-55	NM_001159598	12005	Mm.23684	NM_009733	ENSMUSG00000024182	Axin1	AI316800|Axin|Fu|Kb|Ki|fused|kinky|knobbly	axin 1	protein-coding
chr9	83688198	83688721	Intergenic	(CTAGGG)n|Simple_repeat|Simple_repeat	-3016	NR_046066	100039222	Mm.405596	NR_046066	ENSMUSG00000100155	Gm2109	-	predicted gene 2109	ncRNA
chr6	47767686	47768137	Intergenic	Intergenic	-14986	NR_002841	19799		NR_002841		Rn4.5s	-	4.5S RNA	rRNA
chr9	50739088	50739635	TTS (NM_025865)	TTS (NM_025865)	-1626	NM_001311069	330938	Mm.82598	NM_178118	ENSMUSG00000032064	Dixdc1	4930563F16Rik|BC048182|Ccd1|Ccd1Aalpha1L|Ccd1Abeta1L|Ccd1BalphaL|Ccd1BbetaL|Ccd1CL|mKIAA1735	DIX domain containing 1	protein-coding
chr7	97788227	97789154	5' UTR (NM_001357365, exon 1 of 15)	5' UTR (NM_001357365, exon 1 of 15)	149	NM_001357365	18479	Mm.260227	NM_011035	ENSMUSG00000030774	Pak1	AW045634|PAK-1|Paka	p21 (RAC1) activated kinase 1	protein-coding
chr3	59625489	59626641	Intergenic	L1Md_T|LINE|L1	-103721	NM_001101531	433597	Mm.297801	NM_001101531	ENSMUSG00000090527	Gm5538	-	predicted gene 5538	protein-coding
chr14	56811365	56812700	promoter-TSS (NM_144842)	promoter-TSS (NM_144842)	43	NR_152252	100503842	Mm.297636	NR_152252	ENSMUSG00000100017	2410022M11Rik	-	RIKEN cDNA 2410022M11 gene	ncRNA
chr19	41980549	41981985	promoter-TSS (NM_028152)	promoter-TSS (NM_028152)	-131	NM_028152	72199	Mm.218940	NM_028152	ENSMUSG00000025159	Mms19	2410001K24Rik|2610042O15Rik|AI316855|C79368|C86341|Mms19l	MMS19 cytosolic iron-sulfur assembly component	protein-coding
chr10	39731215	39732888	promoter-TSS (NM_011264)	promoter-TSS (NM_011264)	-44	NR_038037	327744	Mm.295265	NM_183198	ENSMUSG00000087177	E130307A14Rik	-	RIKEN cDNA E130307A14 gene	ncRNA
chr10	30216148	30217107	Intergenic	L1Md_T|LINE|L1	-16087	NM_001109747	66311	Mm.251779	NM_001109747	ENSMUSG00000075266	Cenpw	2610036L11Rik|Cug2	centromere protein W	protein-coding
chr5	110770233	110771120	promoter-TSS (NM_029337)	promoter-TSS (NM_029337)	41	NM_029337	75560	Mm.270487	NM_029337	ENSMUSG00000029505	Ep400	1700020J09Rik|AU023439|mDomino|mKIAA1498|p400	E1A binding protein p400	protein-coding
chr5	132543108	132544365	promoter-TSS (NM_001363480)	promoter-TSS (NM_001363480)	-516	NM_001363480	319974	Mm.409595	NM_177047	ENSMUSG00000029673	Auts2	2700063G02Rik|A730011F23Rik|D830032G16Rik	autism susceptibility candidate 2	protein-coding
chr14	120830486	120830806	Intergenic	CpG	-80548	NM_023579	70572	Mm.221452	NM_023579	ENSMUSG00000030662	Ipo5	1110011C18Rik|5730478E03Rik|AA409333|C76941|IMB3|Kpnb3|Ranbp5|imp5	importin 5	protein-coding
chr8	69749607	69750200	promoter-TSS (NM_001200023)	promoter-TSS (NM_001200023)	59	NM_001200023	620419	Mm.460423	NM_001200023	ENSMUSG00000092260	Zfp963	-	zinc finger protein 963	protein-coding
chr13	54687336	54688622	promoter-TSS (NM_001146026)	promoter-TSS (NM_001146026)	-171	NM_001146025	105239	Mm.25366	NM_134064	ENSMUSG00000034928	Rnf44	AI854545|mKIAA1100	ring finger protein 44	protein-coding
chr17	70229410	70230625	intron (NM_001360665, intron 3 of 14)	L1Md_T|LINE|L1	-194775	NM_027712	224997	Mm.311840	NM_027712	ENSMUSG00000003279	Dlgap1	4933422O14Rik|9630002F18|AI845682|AI848168|BB075781|D17Bwg0511e|GKAP/SAPAP|GKPA/SAPAP|Gkap|Sapap1|mKIAA4162	DLG associated protein 1	protein-coding
chr8	79638912	79639943	promoter-TSS (NM_001256033)	promoter-TSS (NM_001256033)	-249	NM_001256033	73945	Mm.34348	NM_001081164	ENSMUSG00000036990	Otud4	4930431L18Rik|AI449692|D8Ertd69e|mKIAA1046	OTU domain containing 4	protein-coding
chr15	36929290	36929889	Intergenic	C-rich|Low_complexity|Low_complexity	77813	NM_026521	68036	Mm.371631	NM_026521	ENSMUSG00000062397	Zfp706	3110006P09Rik|AA793007|AW536850|C77232|Znf706	zinc finger protein 706	protein-coding
chr3	94658414	94659337	promoter-TSS (NM_011656)	promoter-TSS (NM_011656)	-3	NM_011656	22156	Mm.10214	NM_011656	ENSMUSG00000005968	Tuft1	-	tuftelin 1	protein-coding
chr19	29100876	29101591	promoter-TSS (NM_021525)	promoter-TSS (NM_021525)	-142	NM_021525	59028	Mm.28630	NM_021525	ENSMUSG00000024785	Rcl1	2310040A02Rik|AI789745|C76567|RPCL1|Rnac	RNA terminal phosphate cyclase-like 1	protein-coding
chr10	81181422	81183328	promoter-TSS (NM_001190474)	promoter-TSS (NM_001190474)	-632	NM_001190474	13144	Mm.10294	NM_007828	ENSMUSG00000034974	Dapk3	ZIPK|dlk	death-associated protein kinase 3	protein-coding
chr3	120825274	120826562	intron (NR_130170, intron 1 of 18)	L1Md_T|LINE|L1	60814	NR_130170	320739	Mm.388474	NR_130170		6530403H02Rik	-	RIKEN cDNA 6530403H02 gene	ncRNA
chr10	80622014	80623254	promoter-TSS (NM_134002)	promoter-TSS (NM_134002)	-146	NM_134002	103236	Mm.29873	NM_134002	ENSMUSG00000003345	Csnk1g2	2810429I12Rik|AI463719	casein kinase 1, gamma 2	protein-coding
chr7	57373098	57374653	intron (NM_008074, intron 2 of 9)	L1Md_T|LINE|L1	13340	NM_008074	14407	Mm.322667	NM_008074	ENSMUSG00000055026	Gabrg3	6330406O05Rik|B230362M20Rik|Gabrg-3	gamma-aminobutyric acid (GABA) A receptor, subunit gamma 3	protein-coding
chr4	43039808	43040497	5' UTR (NM_001253353, exon 1 of 9)	5' UTR (NM_001253353, exon 1 of 9)	149	NM_001253354	230088	Mm.260162	NM_172691	ENSMUSG00000036002	Fam214b	B230312A22Rik	family with sequence similarity 214, member B	protein-coding
chr9	88481864	88483182	promoter-TSS (NM_001311113)	promoter-TSS (NM_001311113)	-126	NM_019666	56403	Mm.260545	NM_019666	ENSMUSG00000032423	Syncrip	2610109K23Rik|4632417O19Rik|GRY-RBP|Nsap1|Nsap1l|hnRNP Q|pp68	synaptotagmin binding, cytoplasmic RNA interacting protein	protein-coding
chr9	119340975	119341706	promoter-TSS (NM_130864)	promoter-TSS (NM_130864)	46	NM_001357516	113868	Mm.205266	NM_130864	ENSMUSG00000036138	Acaa1a	Acaa|Acaa1|D9Ertd25e|PTL	acetyl-Coenzyme A acyltransferase 1A	protein-coding
chr13	65414907	65415405	Intergenic	Intergenic	-66562	NM_001371118
chr5	24842136	24843092	promoter-TSS (NM_053075)	promoter-TSS (NM_053075)	-253	NM_053075	19744	Mm.319175	NM_053075	ENSMUSG00000028945	Rheb	Rheb1	Ras homolog enriched in brain	protein-coding
chr2	75704088	75705346	promoter-TSS (NM_010902)	promoter-TSS (NM_010902)	-54	NR_132727	18024	Mm.1025	NM_010902	ENSMUSG00000015839	Nfe2l2	Nrf2	nuclear factor, erythroid derived 2, like 2	protein-coding
chr6	113076012	113078104	promoter-TSS (NM_028385)	promoter-TSS (NM_028385)	186	NR_027008	14910	Mm.280950	NR_027008	ENSMUSG00000086429	Gt(ROSA)26Sor	AV258896|Gtrgeo26|Gtrosa26|R26|ROSA26|Thumpd3as1	gene trap ROSA 26, Philippe Soriano	ncRNA
chr14	54893756	54894529	promoter-TSS (NM_019402)	promoter-TSS (NM_019402)	-1	NM_019402	54196	Mm.7723	NM_019402	ENSMUSG00000022194	Pabpn1	PAB2|Pabp3|mPABII	poly(A) binding protein, nuclear 1	protein-coding
chr7	24470876	24471534	intron (NM_011113, intron 3 of 6)	ZP3AR|Satellite|Satellite	8722	NM_011113	18793	Mm.1359	NM_011113	ENSMUSG00000046223	Plaur	Cd87|u-PAR|uPAR	plasminogen activator, urokinase receptor	protein-coding
chr13	64432210	64432927	promoter-TSS (NM_053180)	promoter-TSS (NM_053180)	15	NM_053180	105278	Mm.74982	NM_053180	ENSMUSG00000021483	Cdk20	4932702G04Rik|AU019450|AW558027|CDCH|Ccrk|PNQLARE|p42	cyclin-dependent kinase 20	protein-coding
chr4	45011850	45012802	promoter-TSS (NM_001163284)	promoter-TSS (NM_001163284)	86	NM_001163284	230119	Mm.44222	NM_173399	ENSMUSG00000049657	Zbtb5	5930421I10|9430083K24Rik|AI646847|mKIAA0354	zinc finger and BTB domain containing 5	protein-coding
chr4	102859357	102859947	intron (NM_001285852, intron 2 of 25)	ORR1D1|LTR|ERVL-MaLR	99517	NM_001285859	73094	Mm.54201	NM_144906	ENSMUSG00000028524	Sgip1	3110007P09Rik|SGIP1alpha|gag	SH3-domain GRB2-like (endophilin) interacting protein 1	protein-coding
chr4	23652501	23653413	Intergenic	L1Md_T|LINE|L1	-843494	NM_199467	212377	Mm.120919	NM_199467	ENSMUSG00000045751	Mms22l	F730047E07Rik|Gm134	MMS22-like, DNA repair protein	protein-coding
chr12	54737883	54739018	Intergenic	Intergenic	-42556	NM_025456	66266	Mm.156440	NM_025456	ENSMUSG00000054302	Eapp	1810011O16Rik	E2F-associated phosphoprotein	protein-coding
chr17	5093152	5093777	intron (NM_001085355, intron 2 of 19)	intron (NM_001085355, intron 2 of 19)	98390	NM_001085355	239985	Mm.133401	NM_001085355	ENSMUSG00000069729	Arid1b	8030481M12|9330189K18Rik|AI836955|Ardi1b|B230217J03Rik|BAF250B|mKIAA1235	AT rich interactive domain 1B (SWI-like)	protein-coding
chr13	63430666	63431606	intron (NM_001347515, intron 1 of 15)	intron (NM_001347515, intron 1 of 15)	609	NM_007985	14088	Mm.126106	NM_007985	ENSMUSG00000021461	Fancc	Facc	Fanconi anemia, complementation group C	protein-coding
chr3	33970095	33970357	Intergenic	Intergenic	-49853	NM_001113188	14359	Mm.259021	NM_008053	ENSMUSG00000027680	Fxr1	1110050J02Rik|9530073J07Rik|AI851072|Fxr1h|Fxr1p	fragile X mental retardation gene 1, autosomal homolog	protein-coding
chr5	140830189	140830852	promoter-TSS (NM_010302)	promoter-TSS (NM_010302)	-89	NM_010302	14673	Mm.370185	NM_010302	ENSMUSG00000000149	Gna12	AI414047|AI504261|Galpha12	guanine nucleotide binding protein, alpha 12	protein-coding
chr19	4282799	4283484	promoter-TSS (NM_026720)	promoter-TSS (NM_026720)	-4	NM_026720	68423	Mm.23642	NM_026720	ENSMUSG00000005986	Ankrd13d	0710001P18Rik|AI430801	ankyrin repeat domain 13 family, member D	protein-coding
chr17	33718423	33718916	promoter-TSS (NR_045522)	promoter-TSS (NR_045522)	8	NM_001252480	224703	Mm.311439	NM_145486	ENSMUSG00000079557	2025-03-02	9530046H09Rik|MARCH-II	membrane-associated ring finger (C3HC4) 2	protein-coding
chr2	44926934	44927740	promoter-TSS (NM_001362987)	promoter-TSS (NM_001362987)	-101	NR_156430	227835	Mm.314312	NM_172662	ENSMUSG00000036890	Gtdc1	E330008O22Rik	glycosyltransferase-like domain containing 1	protein-coding
chr12	40445467	40446598	promoter-TSS (NM_178845)	promoter-TSS (NM_178845)	-21	NM_172803	238130	Mm.341423	NM_172803	ENSMUSG00000035954	Dock4	5330406C03|6330411N01Rik|AF263288|C030023J22|mKIAA0716	dedicator of cytokinesis 4	protein-coding
chr6	82652450	82653158	promoter-TSS (NM_025882)	promoter-TSS (NM_025882)	61	NM_025882	66979	Mm.195753	NM_025882	ENSMUSG00000030042	Pole4	2400007P05Rik|5830430F06Rik	polymerase (DNA-directed), epsilon 4 (p12 subunit)	protein-coding
chr1	134556720	134557228	Intergenic	CpG	-3204	NM_152895	75605	Mm.28995	NM_152895	ENSMUSG00000042207	Kdm5b	2010009J12Rik|2210016I17Rik|AW556288|D1Ertd202e|Jarid1b|PLU-1|PUT1|Plu1|RBBP2H1A|Rb-Bp2|mKIAA4034	lysine (K)-specific demethylase 5B	protein-coding
chr1	69231555	69232493	Intergenic	L1Md_T|LINE|L1	-123965	NM_010154	13869	Mm.442420	NM_010154	ENSMUSG00000062209	Erbb4	Her4|c-erbB-4	erb-b2 receptor tyrosine kinase 4	protein-coding
chr5	21645547	21646391	promoter-TSS (NM_026034)	promoter-TSS (NM_026034)	-37	NM_026034	67211	Mm.260782	NM_026034	ENSMUSG00000038525	Armc10	2810037C14Rik|Svh	armadillo repeat containing 10	protein-coding
chr18	25168474	25169403	promoter-TSS (NM_001142698)	promoter-TSS (NM_001142698)	-61	NM_001004361	66648	Mm.263189	NM_001004361	ENSMUSG00000024269	Tpgs2	5730437P09Rik|5730494M16Rik|AI666318|Pgs2	tubulin polyglutamylase complex subunit 2	protein-coding
chr5	124861985	124863470	promoter-TSS (NM_001081750)	promoter-TSS (NM_001081750)	22	NM_001081750	269704	Mm.138617	NM_001081750	ENSMUSG00000079215	Zfp664	AW060232|D930038J03Rik|ZFOC1|Znf664	zinc finger protein 664	protein-coding
chr12	21417081	21417903	promoter-TSS (NM_011739)	promoter-TSS (NM_011739)	-56	NM_011739	22630	Mm.289630	NM_011739	ENSMUSG00000076432	Ywhaq	2700028P07Rik|AA409740|AU021156|R74690	tyrosine 3-monooxygenase/tryptophan 5-monooxygenase activation protein theta	protein-coding
chr6	128200156	128201101	Intergenic	CpG	-16825	NR_077223	330427	Mm.426356	NR_077223	ENSMUSG00000107879	9330102E08Rik	-	RIKEN cDNA 9330102E08 gene	ncRNA
chr18	7609013	7609810	intron (NM_001081287, intron 1 of 16)	SUBTEL_sa|Satellite|Satellite	-1257	NM_001360860	75739	Mm.133293	NM_001081287	ENSMUSG00000057440	Mpp7	1110068J02Rik|2810038M04Rik|5430426E14Rik|AI415104|Gm955	membrane protein, palmitoylated 7 (MAGUK p55 subfamily member 7)	protein-coding
chr10	40883054	40883882	promoter-TSS (NM_027879)	promoter-TSS (NM_027879)	-66	NM_031877	83767	Mm.41353	NM_031877	ENSMUSG00000019831	Wasf1	AI195380|AI838537|Scar|WAVE|WAVE-1	WAS protein family, member 1	protein-coding
chr14	19584504	19585688	Intergenic	CpG	17491	NM_001024706	432825	Mm.327147	NM_001024706	ENSMUSG00000095024	Gm5458	EG432825	predicted gene 5458	protein-coding
chr6	11832160	11833832	Intergenic	L1Md_A|LINE|L1	74454	NM_010886	17992	Mm.415865	NM_010886	ENSMUSG00000029632	Ndufa4	MLRQ	Ndufa4, mitochondrial complex associated	protein-coding
chr5	15482908	15484345	Intergenic	Lx2A1|LINE|L1	45596	NM_001310449	100861755	Mm.382859	NM_001310449	ENSMUSG00000106445	Gm21190	-	predicted gene, 21190	protein-coding
chr14	42204768	42205346	Intergenic	L1Md_A|LINE|L1	54991	NR_105055	101056136	Mm.489000	NR_105055	ENSMUSG00000092152	Gm17026	-	predicted gene 17026	ncRNA
chr17	24426278	24427108	promoter-TSS (NM_010023)	promoter-TSS (NM_010023)	10	NM_010023	13177	Mm.291743	NM_010023	ENSMUSG00000024132	Eci1	Dci|eci	enoyl-Coenzyme A delta isomerase 1	protein-coding
chr17	25985244	25986070	non-coding (NR_151779, exon 1 of 11)	non-coding (NR_151779, exon 1 of 11)	139	NR_151779	50817	Mm.216072	NM_015830	ENSMUSG00000037326	Capn15	Solh	calpain 15	protein-coding
chr10	20312045	20313199	intron (NM_001025392, intron 1 of 12)	CpG	153	NM_001025393	72567	Mm.294783	NM_153787	ENSMUSG00000037608	Bclaf1	2610102K23Rik|2700025J07Rik|2810454G14Rik|5730534O06Rik|AI450190|AW556225|Btf|mKIAA0164	BCL2-associated transcription factor 1	protein-coding
chr7	30882538	30882948	Intergenic	ZP3AR|Satellite|Satellite	-2401	NM_001043317	12483	Mm.260994	NM_009845	ENSMUSG00000030577	Cd22	A530093D23|Lyb-8|Lyb8	CD22 antigen	protein-coding
chr7	100371700	100372391	promoter-TSS (NM_001017985)	promoter-TSS (NM_001017985)	-149	NM_028292	72590	Mm.177502	NM_028292	ENSMUSG00000030718	Ppme1	1110069N17Rik|2700017M01Rik|PME-1|Pme1	protein phosphatase methylesterase 1	protein-coding
chr2	73892119	73893183	promoter-TSS (NM_009715)	promoter-TSS (NM_009715)	-12	NM_009715	11909	Mm.209903	NM_009715	ENSMUSG00000027104	Atf2	Atf-2|CRE-BP|Creb2|D130078H02Rik|D18875|Tg(Gzma-Klra1)7Wum|mXBP	activating transcription factor 2	protein-coding
chr4	101646965	101647897	promoter-TSS (NM_175036)	promoter-TSS (NM_175036)	-352	NM_175036	230514	Mm.4756	NM_175036	ENSMUSG00000035212	Leprot	LEPR|OB-RGRP|Obrgrp|VPS55	leptin receptor overlapping transcript	protein-coding
chr15	93274896	93275537	promoter-TSS (NM_001033275)	promoter-TSS (NM_001033275)	-37	NM_001357006	223827	Mm.22819	NM_001033275	ENSMUSG00000036197	Gxylt1	Glt8d3|Gm1228|Gm87	glucoside xylosyltransferase 1	protein-coding
chr12	4917087	4917851	5' UTR (NM_001362349, exon 1 of 28)	5' UTR (NM_001362349, exon 1 of 28)	116	NM_001362349	320817	Mm.210966	NM_001099628	ENSMUSG00000052812	Atad2b	1110014E10Rik|BC032887|C79189|D530031C13Rik	ATPase family, AAA domain containing 2B	protein-coding
chr8	57571551	57572073	intron (NM_001167981, intron 2 of 11)	G-rich|Low_complexity|Low_complexity	59969	NM_001363444	97165	Mm.276881	NM_008252	ENSMUSG00000054717	Hmgb2	C80539|HMG-2|Hmg2	high mobility group box 2	protein-coding
chr17	26243819	26244663	promoter-TSS (NM_207217)	promoter-TSS (NM_207217)	1	NM_207217	106581	Mm.28844	NM_207217	ENSMUSG00000024187	Fam234a	Itfg3	family with sequence similarity 234, member A	protein-coding
chr5	21055704	21056497	promoter-TSS (NM_001356591)	promoter-TSS (NM_001356591)	-189	NM_001356591	19248	Mm.319117	NM_011203	ENSMUSG00000028771	Ptpn12	P19-PTP|PTP-P19|PTP-PEST|PTPG1	protein tyrosine phosphatase, non-receptor type 12	protein-coding
chr7	16129272	16130562	promoter-TSS (NM_001347561)	promoter-TSS (NM_001347561)	91	NM_001347561	110891	Mm.241147	NM_148946	ENSMUSG00000030376	Slc8a2	Ncx2	solute carrier family 8 (sodium/calcium exchanger), member 2	protein-coding
chr16	57591811	57593094	intron (NM_025599, intron 1 of 9)	L1Md_T|LINE|L1	14415	NM_025599	66497	Mm.425976	NM_025599	ENSMUSG00000022748	Cmss1	1110001A06Rik|2610528E23Rik|4930572F24Rik|AV099812|AV122629	cms small ribosomal subunit 1	protein-coding
chr18	5989541	5990315	Intergenic	Intergenic	146170	NM_029277	75415	Mm.239675	NM_029277	ENSMUSG00000041225	Arhgap12	2810011M08Rik	Rho GTPase activating protein 12	protein-coding
chr6	47757134	47758089	Intergenic	Intergenic	-4686	NR_002841	19799		NR_002841		Rn4.5s	-	4.5S RNA	rRNA
chr17	27999825	28000040	intron (NM_181413, intron 11 of 24)	intron (NM_181413, intron 11 of 24)	80652	NM_001357681	21463	Mm.29758	NM_013687	ENSMUSG00000062859	Tcp11	D17Ken1|Tcp-11	t-complex protein 11	protein-coding
chr17	14978476	14979276	promoter-TSS (NM_001123368)	promoter-TSS (NM_001123368)	12	NM_001123370	100041574	Mm.393767	NM_001123370	ENSMUSG00000116953	9030025P20Rik	D17Zt9e	RIKEN cDNA 9030025P20 gene	protein-coding
chrX	169986182	169987177	intron (NM_001290504, intron 8 of 9)	intron (NM_001290504, intron 8 of 9)	-7762	NR_029457	654820	Mm.34441	NM_001039559	ENSMUSG00000072844	G530011O06Rik	-	RIKEN cDNA G530011O06 gene	ncRNA
chr10	5804956	5806204	promoter-TSS (NM_025995)	promoter-TSS (NM_025995)	-115	NM_025995	67141	Mm.197520	NM_025995	ENSMUSG00000019773	Fbxo5	2510044I10Rik|C85305|Emi1|Fbxo31	F-box protein 5	protein-coding
chr5	34169288	34169771	promoter-TSS (NM_146159)	promoter-TSS (NM_146159)	-3	NM_001289803	272158	Mm.319286	NM_181857	ENSMUSG00000045102	Poln	POL4P	DNA polymerase N	protein-coding
chr18	21001293	21002409	promoter-TSS (NM_001303011)	promoter-TSS (NM_001303011)	-106	NM_001303011	56515	Mm.253542	NM_019706	ENSMUSG00000024317	Rnf138	2410015A17Rik|2810480D20Rik|STRIN|Trif|Trif-d	ring finger protein 138	protein-coding
chr14	7403554	7404252	Intergenic	Intergenic	-8570	NR_015568	68308	Mm.390669	NR_015568	ENSMUSG00000090585	4933406F09Rik	1700007H14Rik|4930429F21Rik|4930570O04Rik|Gm3768	RIKEN cDNA 4933406F09 gene	ncRNA
chr4	120287341	120288177	promoter-TSS (NM_194060)	promoter-TSS (NM_194060)	-498	NM_194060	329934	Mm.277090	NM_194060	ENSMUSG00000052135	Foxo6	-	forkhead box O6	protein-coding
chr6	113326582	113327358	promoter-TSS (NM_010957)	promoter-TSS (NM_010957)	-6	NR_149720	18294	Mm.43612	NM_010957	ENSMUSG00000030271	Ogg1	Mmh	8-oxoguanine DNA-glycosylase 1	protein-coding
chr9	59577859	59578651	promoter-TSS (NM_175235)	promoter-TSS (NM_175235)	-82	NM_175235	76183	Mm.265415	NM_175235	ENSMUSG00000032297	Celf6	6330569O16Rik|Brunol6	CUGBP, Elav-like family member 6	protein-coding
chr2	17130377	17131289	Intergenic	L1Md_T|LINE|L1	-117107	NR_040632	75069	Mm.50378	NR_040632		4930515L03Rik	-	RIKEN cDNA 4930515L03 gene	ncRNA
chr5	110809788	110810303	promoter-TSS (NM_001347394)	promoter-TSS (NM_001347394)	36	NM_001347394	22241	Mm.271898	NM_009469	ENSMUSG00000029512	Ulk1	AU041434|Unc51.1|mKIAA0722	unc-51 like kinase 1	protein-coding
chr13	91460232	91462090	promoter-TSS (NM_024186)	promoter-TSS (NM_024186)	64	NM_001360775	66970	Mm.343095	NM_024186	ENSMUSG00000003992	Ssbp2	1500004K09Rik|2310079I02Rik|9330163K02Rik|A830008M03Rik|AU067692|AW558684|Hspc116|SSDP2	single-stranded DNA binding protein 2	protein-coding
chr3	14611235	14611640	promoter-TSS (NM_001099674)	promoter-TSS (NM_001099674)	-181	NM_001099674	69126	Mm.389020	NM_001099674	ENSMUSG00000078784	Rbis	1810022K09Rik|AI746582|AL023036	ribosomal biogenesis factor	protein-coding
chr11	121236683	121237388	promoter-TSS (NM_026272)	promoter-TSS (NM_026272)	-201	NM_026272	67608	Mm.291832	NM_026272	ENSMUSG00000000056	Narf	4430402O11Rik	nuclear prelamin A recognition factor	protein-coding
chr9	106891856	106892525	promoter-TSS (NM_029103)	promoter-TSS (NM_029103)	-252	NM_029103	74840	Mm.29778	NM_029103	ENSMUSG00000032575	Manf	3230402M22Rik|AA407711|AA408789|AA673178|Armet|D17914|D18Mgi17	mesencephalic astrocyte-derived neurotrophic factor	protein-coding
chr15	17266475	17267715	Intergenic	L1Md_T|LINE|L1	538180	NM_009869	12565	Mm.439758	NM_009869	ENSMUSG00000025370	Cdh9	-	cadherin 9	protein-coding
chr7	25281759	25283236	5' UTR (NM_027882, exon 1 of 20)	5' UTR (NM_027882, exon 1 of 20)	318	NM_027882	71722	Mm.28833	NM_027882	ENSMUSG00000005442	Cic	1200010B10Rik|mKIAA0306	capicua transcriptional repressor	protein-coding
chr1	106171319	106171760	promoter-TSS (NR_040630)	promoter-TSS (NR_040630)	-15	NR_040630	626049	Mm.247410	NR_040630	ENSMUSG00000101583	Gm20753	-	predicted gene, 20753	ncRNA
chr11	70668522	70669455	TTS (NM_001190379)	TTS (NM_001190379)	428	NM_172561	216873	Mm.432524	NM_172561	ENSMUSG00000018287	Spag7	5730443G10|ACRP|FSA-1|Fsa1l	sperm associated antigen 7	protein-coding
chr17	21679689	21680233	promoter-TSS (NM_001354753)	promoter-TSS (NM_001354753)	84	NM_001354753	100310809	Mm.293030	NM_001354753		Gm10509	-	predicted gene 10509	protein-coding
chr18	9449727	9450491	promoter-TSS (NM_026484)	promoter-TSS (NM_026484)	45	NM_026484	67974	Mm.86523	NM_026484	ENSMUSG00000024286	Ccny	1700025H17Rik|3110050L10Rik|4631402G10Rik|5730405I09Rik	cyclin Y	protein-coding
chr1	27139791	27140328	Intergenic	L1Md_Gf|LINE|L1	-452599	NM_001033764	210940	Mm.297614	NM_001033764	ENSMUSG00000073722	4931408C20Rik	-	RIKEN cDNA 4931408C20 gene	protein-coding
chr7	28179167	28180412	promoter-TSS (NM_001271370)	promoter-TSS (NM_001271370)	306	NM_001037957	13549	Mm.57249	NM_010092	ENSMUSG00000002409	Dyrk1b	Mirk	dual-specificity tyrosine-(Y)-phosphorylation regulated kinase 1b	protein-coding
chr14	52257441	52258115	promoter-TSS (NM_201637)	promoter-TSS (NM_201637)	-18	NM_201637	67772	Mm.289934	NM_201637	ENSMUSG00000053754	Chd8	5830451P18Rik|AU015341|Duplin|HELSNF1|mKIAA1564	chromodomain helicase DNA binding protein 8	protein-coding
chr6	3320127	3320962	Intergenic	Intergenic	32025	NR_036696	667335	Mm.380219	NR_036696	ENSMUSG00000106779	Gm8579	EG667335	spermatogenesis associated glutamate (E)-rich protein 4a pseudogene	pseudo
chr13	65420230	65420887	Intergenic	CpG	-71964	NM_001371118
chr3	55608695	55610245	Intergenic	L1Md_T|LINE|L1	147742	NM_001357468	13175	Mm.393242	NM_019978	ENSMUSG00000027797	Dclk1	1700113D08Rik|2810480F11Rik|AI836758|Click-I|Cpg16|Dcamkl1|Dcl|Dclk|mKIAA0369	doublecortin-like kinase 1	protein-coding
chr1	93511460	93512518	promoter-TSS (NM_145519)	promoter-TSS (NM_145519)	-115	NM_145519	227377	Mm.243091	NM_145519	ENSMUSG00000034066	Farp2	AI465173|BC009153|D030026M03Rik|Fir|mKIAA0793	FERM, RhoGEF and pleckstrin domain protein 2	protein-coding
chr16	44172771	44173648	promoter-TSS (NM_001029889)	promoter-TSS (NM_001029889)	-188	NM_001029889	207806	Mm.310566	NM_001029889	ENSMUSG00000068284	Usf3	5530400K22Rik|Gm1779|Gm608|mKIAA2018	upstream transcription factor family member 3	protein-coding
chr1	167349760	167350407	promoter-TSS (NM_019993)	promoter-TSS (NM_019993)	92	NM_019993	56752	Mm.292539	NM_019993	ENSMUSG00000026687	Aldh9a1	AA139417|Abaldh|ESTM40|TMABA-DH|Tmabadh	aldehyde dehydrogenase 9, subfamily A1	protein-coding
chr17	12915803	12916799	promoter-TSS (NM_001290712)	promoter-TSS (NM_001290712)	-28	NM_013686	21454	Mm.229342	NM_013686	ENSMUSG00000068039	Tcp1	AI528772|CCT|Cct1|Ccta|TRic|Tcp-1|Tp63|c-cpn|p63	t-complex protein 1	protein-coding
chr7	25611446	25612068	Intergenic	ZP3AR|Satellite|Satellite	4096	NM_001039243	632778	Mm.423112	NM_001039243	ENSMUSG00000074261	Erich4	EG632778|Gm7092|Kseg1	glutamate rich 4	protein-coding
chr11	118289977	118290636	promoter-TSS (NM_001033528)	promoter-TSS (NM_001033528)	-62	NM_001033528	72344	Mm.232293	NM_001033528	ENSMUSG00000033909	Usp36	2700002L06Rik|mKIAA1453	ubiquitin specific peptidase 36	protein-coding
chr7	45017428	45018022	promoter-TSS (NM_009101)	promoter-TSS (NM_009101)	-217	NM_009101	20130	Mm.389894	NM_009101	ENSMUSG00000038387	Rras	AI573426	related RAS viral (r-ras) oncogene	protein-coding
chr11	116852425	116853967	promoter-TSS (NM_178620)	promoter-TSS (NM_178620)	-102	NM_011358	20382	Mm.21841	NM_011358	ENSMUSG00000034120	Srsf2	D11Wsu175e|MRF-1|Pr264|SC35|Sfrs10|Sfrs2	serine/arginine-rich splicing factor 2	protein-coding
chr16	62846540	62847446	promoter-TSS (NM_026577)	promoter-TSS (NM_026577)	47	NM_026577	68146	Mm.96833	NM_026577	ENSMUSG00000022911	Arl13b	A530097K21Rik|A930014M17Rik|Arl2l1|C530009C10Rik|hnn	ADP-ribosylation factor-like 13B	protein-coding
chr4	139192317	139193211	promoter-TSS (NM_009798)	promoter-TSS (NM_009798)	-135	NM_009798	12345	Mm.2945	NM_009798	ENSMUSG00000028745	Capzb	1700120C01Rik|AI325129|CPB1|CPB2|CPbeat2|CPbeta1|CPbeta2|Cappb1	capping protein (actin filament) muscle Z-line, beta	protein-coding
chr10	76961484	76962349	promoter-TSS (NM_021568)	promoter-TSS (NM_021568)	31	NM_021568	59093	Mm.272803	NM_021568	ENSMUSG00000001120	Pcbp3	AlphaCP-3	poly(rC) binding protein 3	protein-coding
chr3	54414751	54415213	Intergenic	(GGATG)n|Simple_repeat|Simple_repeat	53875	NM_001198765	50706	Mm.236067	NM_015784	ENSMUSG00000027750	Postn	A630052E07Rik|AI747096|OSF-2|Osf2|PLF|PN	periostin, osteoblast specific factor	protein-coding
chr2	15055011	15055630	promoter-TSS (NM_029466)	promoter-TSS (NM_029466)	0	NM_029466	75869	Mm.174068	NM_029466	ENSMUSG00000017418	Arl5b	4930587A11Rik|AW146430|Arl8	ADP-ribosylation factor-like 5B	protein-coding
chrX	50083434	50084391	Intergenic	L1Md_T|LINE|L1	-73677	NM_146390	258385	Mm.377470	NM_146390	ENSMUSG00000050504	Olfr1323	MOR216-1	olfactory receptor 1323	protein-coding
chr9	35210656	35211328	promoter-TSS (NM_001359815)	promoter-TSS (NM_001359815)	63	NM_001291449	235169	Mm.138512	NM_172291	ENSMUSG00000039048	Foxred1	BC024806|TEG-23|Tex23	FAD-dependent oxidoreductase domain containing 1	protein-coding
chr11	75461191	75462688	intron (NR_030711, intron 1 of 2)	CpG	400	NR_030711	100042498	Mm.482242	NR_030711	ENSMUSG00000085148	Mir22hg	2210403K04Rik|mir-22	Mir22 host gene (non-protein coding)	ncRNA
chr7	66541383	66542089	Intergenic	L1Md_T|LINE|L1	-114259	NM_053080	56847	Mm.140988	NM_053080	ENSMUSG00000015134	Aldh1a3	ALDH6|RALDH3|V1	aldehyde dehydrogenase family 1, subfamily A3	protein-coding
chr11	22286549	22287499	promoter-TSS (NM_001252515)	promoter-TSS (NM_001252515)	-229	NM_153078	216565	Mm.491265	NM_153078	ENSMUSG00000042302	Ehbp1	AF424697|Flj21950|NACSIN	EH domain binding protein 1	protein-coding
chr3	88509777	88510365	Intergenic	Intergenic	-6719	NM_001002011	16905	Mm.243014	NM_019390	ENSMUSG00000028063	Lmna	Dhe	lamin A	protein-coding
chr3	148850529	148850898	intron (NM_001081298, intron 8 of 23)	intron (NM_001081298, intron 8 of 23)	103922	NM_001081298	99633	Mm.9776	NM_001081298	ENSMUSG00000028184	Adgrl2	AI450192|CIRL-2|Gm619|Lec1|Lphh1|Lphn2|mKIAA0786	adhesion G protein-coupled receptor L2	protein-coding
chr6	55018469	55018745	Intergenic	C-rich|Low_complexity|Low_complexity	-19394	NM_180678	353172	Mm.250004	NM_180678	ENSMUSG00000029777	Gars	GENA202|Gena201|Nmf249|Sgrp23	glycyl-tRNA synthetase	protein-coding
chr6	66535087	66535735	5' UTR (NM_019499, exon 1 of 5)	5' UTR (NM_019499, exon 1 of 5)	190	NM_019499	56150	Mm.489653	NM_019499	ENSMUSG00000029910	Mad2l1	AA673185|MAD2	MAD2 mitotic arrest deficient-like 1	protein-coding
chr1	192794939	192795343	Intergenic	Intergenic	-23922	NM_144881	226861	Mm.145857	NM_144881	ENSMUSG00000037375	Hhat	2810432O22Rik|AI462858|AP-2CRE|Skn|Tg(TFAP2A-cre)1Will	hedgehog acyltransferase	protein-coding
chr5	14984912	14985620	Intergenic	Lx2A1|LINE|L1	-6367	NM_001281514	100503549	Mm.491086	NM_001281514	ENSMUSG00000072188	Gm10354	-	predicted gene 10354	protein-coding
chr7	141215278	141216146	promoter-TSS (NM_025886)	promoter-TSS (NM_025886)	-148	NM_025886	66985	Mm.21202	NM_025886	ENSMUSG00000038618	Rassf7	2400009B11Rik|AW210608	Ras association (RalGDS/AF-6) domain family (N-terminal) member 7	protein-coding
chr4	17308883	17309769	Intergenic	L1Md_T|LINE|L1	-543567	NR_135158	17389	Mm.187315	NM_019724	ENSMUSG00000028226	Mmp16	MT-MMP 3|MT3-MMP|Mt3mmp	matrix metallopeptidase 16	protein-coding
chr17	5189617	5190311	intron (NM_001085355, intron 4 of 19)	CpG	194890	NM_001085355	239985	Mm.133401	NM_001085355	ENSMUSG00000069729	Arid1b	8030481M12|9330189K18Rik|AI836955|Ardi1b|B230217J03Rik|BAF250B|mKIAA1235	AT rich interactive domain 1B (SWI-like)	protein-coding
chr17	21488689	21489273	promoter-TSS (NM_013843)	promoter-TSS (NM_013843)	-7	NM_013843	24132	Mm.42140	NM_013843	ENSMUSG00000057409	Zfp53	D030067O06Rik|KRAZ1|Zfp-53|Zfp118|zfas8	zinc finger protein 53	protein-coding
chr5	8710553	8712075	intron (NM_011076, intron 16 of 29)	L1Md_T|LINE|L1	-86833	NM_011075	18669	Mm.146649	NM_011075	ENSMUSG00000028970	Abcb1b	Abcb1|Mdr1|Mdr1b|Pgy-1|Pgy1|mdr	ATP-binding cassette, sub-family B (MDR/TAP), member 1B	protein-coding
chr12	51691104	51692449	5' UTR (NM_052973, exon 1 of 18)	5' UTR (NM_052973, exon 1 of 18)	138	NM_052973	94186	Mm.65979	NM_052973	ENSMUSG00000020954	Strn3	Gs2na|SG2NA	striatin, calmodulin binding protein 3	protein-coding
chr6	114506956	114507378	Intergenic	IMPB_01|Satellite|Satellite	48645	NM_001317124	15465	Mm.333327	NM_008285	ENSMUSG00000053004	Hrh1	Bphs|H1R|HH1R|Hir	histamine receptor H1	protein-coding
chr3	95881933	95882790	promoter-TSS (NM_001033302)	promoter-TSS (NM_001033302)	-133	NM_001033302	229599	Mm.331218	NM_001033302	ENSMUSG00000038550	Ciart	Chrono|Gm129	circadian associated repressor of transcription	protein-coding
chr1	43827229	43828178	non-coding (NR_160750, exon 1 of 14)	non-coding (NR_160750, exon 1 of 14)	136	NM_001368288	67883	Mm.387202	NM_026430	ENSMUSG00000057363	Uxs1	1600025I13Rik|AI451869|AI649125|AW550562	UDP-glucuronate decarboxylase 1	protein-coding
chr14	20082715	20083425	exon (NM_026209, exon 1 of 2)	exon (NM_026209, exon 1 of 2)	102	NM_026209	67509	Mm.292423	NM_026209	ENSMUSG00000045107	Saysd1	1810063B07Rik|4930488P03Rik	SAYSVFN motif domain containing 1	protein-coding
chr4	149517883	149518296	promoter-TSS (NM_023465)	promoter-TSS (NM_023465)	-152	NM_023465	67087	Mm.299735	NM_023465	ENSMUSG00000028988	Ctnnbip1	1110008O09Rik|2310001I19Rik|AW457332|Catnbip1|Icat	catenin beta interacting protein 1	protein-coding
chr5	42188377	42189302	intron (NR_131130, intron 1 of 2)	L1Md_T|LINE|L1	120879	NR_131130	433882	Mm.319353	NR_131130	ENSMUSG00000067285	Gm16223	EG433882	predicted gene 16223	ncRNA
chr7	86571255	86572530	Intergenic	L1Md_T|LINE|L1	-13385	NM_146851	258850	Mm.334007	NM_146851	ENSMUSG00000059319	Olfr295	MOR220-1	olfactory receptor 295	protein-coding
chrY	90798855	90800728	intron (NM_133362, intron 2 of 3)	intron (NM_133362, intron 2 of 3)	14349	NR_137282	170942	Mm.76062	NM_133362	ENSMUSG00000096768	Erdr1	edr	erythroid differentiation regulator 1	protein-coding
chrX	97604346	97605150	Intergenic	L1Md_T|LINE|L1	-227539	NM_175540	245527	Mm.189270	NM_175540	ENSMUSG00000034457	Eda2r	9430060M22Rik|TNFRSF27|Xedar	ectodysplasin A2 receptor	protein-coding
chr19	5488963	5489484	promoter-TSS (NM_027877)	promoter-TSS (NM_027877)	-844	NR_153769	71711	Mm.27697	NM_027877	ENSMUSG00000024906	Mus81	1200008A18Rik|AI182501|AW045863	MUS81 structure-specific endonuclease subunit	protein-coding
chr6	42264677	42265293	promoter-TSS (NM_007610)	promoter-TSS (NM_007610)	0	NM_007610	12366	Mm.3921	NM_007610	ENSMUSG00000029863	Casp2	CASP-2|ICH-1|NEDD-2|Nedd2	caspase 2	protein-coding
chr10	80826221	80827079	promoter-TSS (NM_008753)	promoter-TSS (NM_008753)	-6	NM_008753	18245	Mm.398119	NM_008753	ENSMUSG00000035242	Oaz1	AZ-1|AZ1|Antizyme|ODC-Az|Oaz	ornithine decarboxylase antizyme 1	protein-coding
chr4	19708764	19709335	promoter-TSS (NM_001276292)	promoter-TSS (NM_001276292)	-45	NR_074090	107568	Mm.78312	NM_177327	ENSMUSG00000041058	Wwp1	8030445B08Rik|AIP5|SDRP1|Tiul1	WW domain containing E3 ubiquitin protein ligase 1	protein-coding
chr14	56885976	56886954	promoter-TSS (NM_029498)	promoter-TSS (NM_029498)	-138	NM_177627	76007	Mm.31417	NM_029498	ENSMUSG00000021945	Zmym2	5830413P05Rik|FIM|MYM|RAMP|SCLL|Zfp198|Znf198	zinc finger, MYM-type 2	protein-coding
chr6	71439588	71441314	5' UTR (NM_024288, exon 1 of 9)	5' UTR (NM_024288, exon 1 of 9)	186	NM_001355745	68477	Mm.28474	NM_024288	ENSMUSG00000002222	Rmnd5a	1110007A06Rik|AJ237586|AW125795|Gid2|MTA.D02.090	required for meiotic nuclear division 5 homolog A	protein-coding
chr15	57911999	57912427	promoter-TSS (NM_001081396)	promoter-TSS (NM_001081396)	14	NM_001356310	210544	Mm.390835	NM_199300	ENSMUSG00000022364	Tbc1d31	4B3|D330013L20Rik|Gm85|Wdr67	TBC1 domain family, member 31	protein-coding
chr9	88438558	88439374	promoter-TSS (NM_172926)	promoter-TSS (NM_172926)	-37	NM_172926	244962	Mm.439873	NM_172926	ENSMUSG00000032422	Snx14	B830022K16|C330035N22Rik|YR-14	sorting nexin 14	protein-coding
chr19	38054337	38055231	promoter-TSS (NM_001164362)	promoter-TSS (NM_001164362)	-200	NM_028293	74107	Mm.9916	NM_028293	ENSMUSG00000024989	Cep55	1200008O12Rik|2700032M20Rik	centrosomal protein 55	protein-coding
chr6	48444009	48445179	intron (NM_001085417, intron 1 of 4)	C-rich|Low_complexity|Low_complexity	496	NM_001085416	68910	Mm.2464	NM_020589	ENSMUSG00000068551	Zfp467	1190001I08Rik|AB041616|AI426952|AV017623|EZI|MNCb-3350|Znf467	zinc finger protein 467	protein-coding
chr5	135148977	135149788	promoter-TSS (NM_013763)	promoter-TSS (NM_013763)	-304	NM_013763	27368	Mm.36746	NM_013763	ENSMUSG00000005374	Tbl2	C76179|WS-bTRP	transducin (beta)-like 2	protein-coding
chr12	65073463	65074140	intron (NM_013902, intron 1 of 6)	CpG	137	NM_013902	30795	Mm.28480	NM_013902	ENSMUSG00000020949	Fkbp3	25kDa|FKBP-3|FKBP25	FK506 binding protein 3	protein-coding
chr2	3332347	3333265	promoter-TSS (NM_001013376)	promoter-TSS (NM_001013376)	-178	NM_001013376	227522	Mm.293948	NM_001013376	ENSMUSG00000049950	Rpp38	C330006A15Rik	ribonuclease P/MRP 38 subunit	protein-coding
chr17	24250932	24251976	promoter-TSS (NM_007634)	promoter-TSS (NM_007634)	-45	NM_007634	12449	Mm.77695	NM_007634	ENSMUSG00000072082	Ccnf	CycF|Fbxo1	cyclin F	protein-coding
chr10	75893067	75893707	promoter-TSS (NM_001358984)	promoter-TSS (NM_001358984)	-11	NM_001358985	70377	Mm.275878	NM_024440	ENSMUSG00000009092	Derl3	1810006I20Rik|1810063P04Rik|IZP6|derlin-3	Der1-like domain family, member 3	protein-coding
chr9	95292100	95293502	Intergenic	L1Md_T|LINE|L1	114469	NM_018763	54371	Mm.212446	NM_018763	ENSMUSG00000033350	Chst2	AI428561|AW121776|C130041E03Rik|Chts2|GST-2|GlcNAc6ST|Gn6st	carbohydrate sulfotransferase 2	protein-coding
chr7	80232335	80233045	promoter-TSS (NM_178752)	promoter-TSS (NM_178752)	115	NM_001291275	23991	Mm.30217	NM_011870	ENSMUSG00000030538	Cib1	Cibkip|Kip|Prkdcip	calcium and integrin binding 1 (calmyrin)	protein-coding
chr2	172345294	172345837	promoter-TSS (NM_025912)	promoter-TSS (NM_025912)	-12	NM_025912	67017	Mm.30013	NM_025912	ENSMUSG00000027495	Fam210b	2010011I20Rik|AI430961|AV108736	family with sequence similarity 210, member B	protein-coding
chr2	125279947	125280397	Intergenic	Intergenic	32657	NM_023595	110074	Mm.282499	NM_023595	ENSMUSG00000027203	Dut	5031412I06Rik|5133400F09Rik|D2Bwg0749e|Dutp|dUTPase	deoxyuridine triphosphatase	protein-coding
chrY	6162635	6163028	Intergenic	MURVY-int|LTR|ERV1	1004946	NM_001101623	100040160	Mm.482062	NM_001101623	ENSMUSG00000094081	Gm20826	-	predicted gene, 20826	protein-coding
chr6	65897260	65897845	intron (NM_029549, intron 8 of 10)	intron (NM_029549, intron 8 of 10)	-55019	NM_001161773	67653	Mm.389756	NM_001161773	ENSMUSG00000036463	4930544G11Rik	-	RIKEN cDNA 4930544G11 gene	protein-coding
chr3	43557233	43558433	Intergenic	L1Md_Gf|LINE|L1	1815215	NM_027271	73852	Mm.29006	NM_027271	ENSMUSG00000025766	D3Ertd751e	2810009O15Rik|4930415G15Rik	DNA segment, Chr 3, ERATO Doi 751, expressed	protein-coding
chr8	13677010	13677803	exon (NM_009025, exon 1 of 24)	exon (NM_009025, exon 1 of 24)	181	NM_009025	19414	Mm.18517	NM_009025	ENSMUSG00000031453	Rasa3	AI326412|C86362|E130011G04|GAPIII|hlb381|scat	RAS p21 protein activator 3	protein-coding
chr5	135468789	135469878	intron (NM_146001, intron 1 of 30)	ZP3AR|Satellite|Satellite	-74787	NM_148932	107939	Mm.28399	NM_148932	ENSMUSG00000053293	Pom121	2610027A18Rik|C80273|mKIAA0618	nuclear pore membrane protein 121	protein-coding
chr6	47771355	47772482	Intergenic	Intergenic	-18993	NR_002841	19799		NR_002841		Rn4.5s	-	4.5S RNA	rRNA
chr9	96119228	96119773	promoter-TSS (NM_177352)	promoter-TSS (NM_177352)	71	NM_001368879	235533	Mm.213651	NM_177352	ENSMUSG00000041440	Gk5	AV095337|C330018K18Rik|G630067D24Rik	glycerol kinase 5 (putative)	protein-coding
chr4	149954970	149955338	promoter-TSS (NM_029035)	promoter-TSS (NM_029035)	-148	NM_029035	74646	Mm.30	NM_029035	ENSMUSG00000039911	Spsb1	1110014L01Rik|4930422J18Rik|AI596360|AI854583|SSB-1|SSB1	splA/ryanodine receptor domain and SOCS box containing 1	protein-coding
chr12	85485859	85486402	Intergenic	CpG	12240	NM_010234	14281	Mm.246513	NM_010234	ENSMUSG00000021250	Fos	D12Rfj1|c-fos|cFos	FBJ osteosarcoma oncogene	protein-coding
chr17	15024308	15025295	Intergenic	CpG	-14617	NM_198104	21647	Mm.440445	NM_011560	ENSMUSG00000079707	Tcte3	D17Leh117c|LC2|Tcte-3|Tctex-2|Tctex-4|Tctex2|Tctex4	t-complex-associated testis expressed 3	protein-coding
chr3	34454190	34454409	Intergenic	CpG	-106082	NR_015580	320478	Mm.444063	NR_015580	ENSMUSG00000105265	Sox2ot	B230215L15Rik	SOX2 overlapping transcript (non-protein coding)	ncRNA
chr4	48279306	48280078	promoter-TSS (NM_029572)	promoter-TSS (NM_029572)	-57	NM_001355184	76299	Mm.317701	NM_029572	ENSMUSG00000028343	Erp44	1110001E24Rik|AI849526|AL033348|Txndc4	endoplasmic reticulum protein 44	protein-coding
chr17	15009848	15010719	promoter-TSS (NM_001360662).2	promoter-TSS (NM_001360662).2	-99	NM_198104	21647	Mm.440445	NM_011560	ENSMUSG00000079707	Tcte3	D17Leh117c|LC2|Tcte-3|Tctex-2|Tctex-4|Tctex2|Tctex4	t-complex-associated testis expressed 3	protein-coding
chr1	151428023	151429110	promoter-TSS (NM_026876)	promoter-TSS (NM_026876)	24	NM_001357570	98685	Mm.289373	NM_026876	ENSMUSG00000053286	Trmt1l	1190005F20Rik|AW226554|C1orf25|Trm1-like|Trm1l	tRNA methyltransferase 1 like	protein-coding
chr18	38992613	38993390	promoter-TSS (NM_001361073)	promoter-TSS (NM_001361073)	-144	NM_001361073	71302	Mm.329396	NM_175164	ENSMUSG00000036452	Arhgap26	1810044B20Rik|2610010G17Rik|4933432P15Rik|AI853435|mKIAA0621	Rho GTPase activating protein 26	protein-coding
chr5	52833673	52834210	promoter-TSS (NM_024213)	promoter-TSS (NM_024213)	-194	NM_024213	52206	Mm.272568	NM_024213	ENSMUSG00000029176	Anapc4	2610306D21Rik|APC4|D5Ertd249e	anaphase promoting complex subunit 4	protein-coding
chr4	57955609	57956884	5' UTR (NM_011660, exon 1 of 5)	5' UTR (NM_011660, exon 1 of 5)	165	NM_011660	22166	Mm.260618	NM_011660	ENSMUSG00000028367	Txn1	ADF|AW550880|Trx1|Txn	thioredoxin 1	protein-coding
chr8	64733319	64733949	promoter-TSS (NM_025436)	promoter-TSS (NM_025436)	-56	NM_025436	66234	Mm.30119	NM_025436	ENSMUSG00000031604	Msmo1	1500001G16Rik|C78600|DESP4|ERG25|Sc4mol	methylsterol monoxygenase 1	protein-coding
chr16	81035426	81036337	Intergenic	L1Md_T|LINE|L1	-164816	NM_010954	17968	Mm.433941	NM_010954	ENSMUSG00000022762	Ncam2	Ncam-2|Ocam|RNCAM	neural cell adhesion molecule 2	protein-coding
chr1	150392707	150393791	promoter-TSS (NM_001077237)	promoter-TSS (NM_001077237)	-169	NM_001357579	226499	Mm.222093	NM_145511	ENSMUSG00000006010	Odr4	1810053E15Rik|odr-4	odr4 GPCR localization factor homolog	protein-coding
chr10	80590071	80590725	promoter-TSS (NM_145421)	promoter-TSS (NM_145421)	-57	NM_145421	216169	Mm.29802	NM_145421	ENSMUSG00000003346	Abhd17a	1700013O15Rik|BC005632|D10Bwg1364e|Fam108a	abhydrolase domain containing 17A	protein-coding
chr2	154436183	154436809	promoter-TSS (NM_009823)	promoter-TSS (NM_009823)	12	NM_172860	12396	Mm.29914	NM_009823	ENSMUSG00000038533	Cbfa2t2	A430091M07|C330013D05Rik|Cbfa2t2h|MTGR1	CBFA2/RUNX1 translocation partner 2	protein-coding
chr12	62547787	62549747	Intergenic	L1Md_T|LINE|L1	-139020	NR_131949	73309	Mm.276558	NR_131949		Spanxn4	1700047L15Rik	SPANX family, member N4	ncRNA
chr7	7277489	7278354	intron (NR_003555, intron 1 of 6)	CpG	368	NR_003555	76229	Mm.387947	NM_001113468	ENSMUSG00000095730	Vmn2r29	6430701C03Rik	vomeronasal 2, receptor 29	protein-coding
chr15	38298985	38301272	promoter-TSS (NM_001357677)	promoter-TSS (NM_001357677)	-228	NM_001357677	21847	Mm.4292	NM_013692	ENSMUSG00000037465	Klf10	AI115143|EGR[a]|Egral|Gdnfif|TIEG-1|Tieg|Tieg1|mGIF	Kruppel-like factor 10	protein-coding
chr13	62418888	62420418	Intergenic	L1Md_T|LINE|L1	-36479	NM_001162910	100041979	Mm.445930	NM_001162910	ENSMUSG00000094942	Gm3604	-	predicted gene 3604	protein-coding
chr11	109425515	109426084	promoter-TSS (NM_001252193)	promoter-TSS (NM_001252193)	-147	NM_025275	13929	Mm.211850	NM_025275	ENSMUSG00000020610	Amz2	AA408420|ESTM12|X83328	archaelysin family metallopeptidase 2	protein-coding
chr4	147868354	147868868	promoter-TSS (NM_010244)	promoter-TSS (NM_010244)	108	NM_001025365	28010	Mm.250504	NM_133873	ENSMUSG00000029022	Miip	AA553001|AI853621|D4Wsu114e|IIP45	migration and invasion inhibitory protein	protein-coding
chr5	131497441	131497951	intron (NM_001363480, intron 6 of 19)	ZP3AR|Satellite|Satellite	-82978	NR_152164	545809	Mm.357553	NR_152164	ENSMUSG00000105387	Gm29681	Gm42590	predicted gene, 29681	ncRNA
chr16	22857350	22858238	promoter-TSS (NM_001190805)	promoter-TSS (NM_001190805)	-51	NM_026400	67838	Mm.37516	NM_026400	ENSMUSG00000004460	Dnajb11	1810031F23Rik|ABBP-2|AL024055|Dj9|ERdj3|ERj3p	DnaJ heat shock protein family (Hsp40) member B11	protein-coding
chr9	108832160	108832892	intron (NM_080437, intron 2 of 34)	CpG	6481	NM_001359573	107934	Mm.39945	NM_080437	ENSMUSG00000023473	Celsr3	Adgrc3|Fmi1|flamingo|mKIAA0812	cadherin, EGF LAG seven-pass G-type receptor 3	protein-coding
chr4	53668513	53669950	intron (NM_001369182, intron 5 of 11)	L1Md_T|LINE|L1	37760	NM_001195284	319636	Mm.103464	NM_176966	ENSMUSG00000054752	Fsd1l	A230072O16Rik|Ccdc10|Csdufd1|Fsd1nl	fibronectin type III and SPRY domain containing 1-like	protein-coding
chr10	80329461	80330209	promoter-TSS (NM_008793)	promoter-TSS (NM_008793)	-310	NM_001204931	70335	Mm.28147	NM_139292	ENSMUSG00000035504	Reep6	0610011M24Rik|Dp1l1	receptor accessory protein 6	protein-coding
chrY	8647614	8647975	Intergenic	IAPLTR3-int|LTR|ERVK	187375	NM_001017394	100039753	Mm.291725	NM_001017394	ENSMUSG00000101053	Gm20815	-	predicted gene, 20815	protein-coding
chr17	6978558	6978967	promoter-TSS (NM_026611)	promoter-TSS (NM_026611)	-98	NM_026611	68195	Mm.181237	NM_026611	ENSMUSG00000094724	Rnaset2b	0610007O07Rik|4833423A10Rik|4930532K22Rik|C79750|RNASE6PL|Rnaset2	ribonuclease T2B	protein-coding
chr11	100939314	100939872	promoter-TSS (NM_213660)	promoter-TSS (NM_213660)	-53	NM_011486	20848	Mm.249934	NM_011486	ENSMUSG00000004040	Stat3	1110034C02Rik|AW109958|Aprf	signal transducer and activator of transcription 3	protein-coding
chr7	98309004	98309841	non-coding (NR_153759, exon 1 of 12)	non-coding (NR_153759, exon 1 of 12)	120	NM_001360617	66190	Mm.334041	NM_025408	ENSMUSG00000030760	Acer3	1110057L18Rik|5430429L08Rik|AV015045|Phca|aPHC	alkaline ceramidase 3	protein-coding
chr8	70897161	70897697	promoter-TSS (NM_029751)	promoter-TSS (NM_029751)	14	NM_029751	76808	Mm.379251	NM_029751	ENSMUSG00000045128	Rpl18a	2510019J09Rik	ribosomal protein L18A	protein-coding
chr9	20642480	20643492	promoter-TSS (NM_025401)	promoter-TSS (NM_025401)	108	NR_153857	66177	Mm.390165	NM_025401	ENSMUSG00000084786	Ubl5	1110030M22Rik|beacon	ubiquitin-like 5	protein-coding
chr17	27707858	27708528	intron (NM_178365, intron 9 of 9)	intron (NM_178365, intron 9 of 9)	20758	NM_013891	30051	Mm.26768	NM_013891	ENSMUSG00000024215	Spdef	PDEF|Pse	SAM pointed domain containing ets transcription factor	protein-coding
chr14	74731886	74732645	promoter-TSS (NM_001285423)	promoter-TSS (NM_001285423)	-32	NM_001285423	13885	Mm.38055	NM_016903	ENSMUSG00000021996	Esd	Es-10|Es10|FGH|sid478	esterase D/formylglutathione hydrolase	protein-coding
chr2	140395102	140395825	promoter-TSS (NM_028387)	promoter-TSS (NM_028387)	28	NM_028387	72899	Mm.229466	NM_028387	ENSMUSG00000068205	Macrod2	1110033L15Rik|2610107G07Rik|2900006F19Rik	MACRO domain containing 2	protein-coding
chr8	116993258	116993748	promoter-TSS (NM_026572)	promoter-TSS (NM_026572)	-5	NR_157137	68133	Mm.258462	NM_026572	ENSMUSG00000034424	Gcsh	1100001L02Rik|5730591C18Rik	glycine cleavage system protein H (aminomethyl carrier)	protein-coding
chr5	73256387	73257134	promoter-TSS (NM_028194)	promoter-TSS (NM_028194)	-142	NM_028194	72313	Mm.260594	NM_028194	ENSMUSG00000070733	Fryl	2010313D22Rik|2310004H21Rik|2510002A14Rik|9030227G01Rik|mKIAA0826	FRY like transcription coactivator	protein-coding
chr2	11121340	11122366	Intergenic	L1Md_T|LINE|L1	-50529	NM_008859	18761	Mm.329993	NM_008859	ENSMUSG00000026778	Prkcq	A130035A12Rik|AW494342|PKC-0|PKC-theta|PKCtheta|Pkcq	protein kinase C, theta	protein-coding
chr6	41604900	41605761	promoter-TSS (NM_001146351)	promoter-TSS (NM_001146351)	-152	NM_001146351	13848	Mm.271976	NM_007680	ENSMUSG00000029869	Ephb6	Cekl|Mep	Eph receptor B6	protein-coding
chr7	80294107	80294712	promoter-TSS (NM_001285998)	promoter-TSS (NM_001285998)	-42	NM_001285997	233406	Mm.227274	NM_145150	ENSMUSG00000038943	Prc1	D7Ertd348e	protein regulator of cytokinesis 1	protein-coding
chr15	103410685	103412514	intron (NM_028797, intron 6 of 8)	L1Md_T|LINE|L1	18828	NM_028797	74174	Mm.325325	NM_028797	ENSMUSG00000022487	Gtsf1	1700006H03Rik|Cue110	gametocyte specific factor 1	protein-coding
chr6	136816651	136816912	intron (NM_021714, intron 10 of 11)	CpG	8533	NM_177688	232440	Mm.154564	NM_177688	ENSMUSG00000060032	H2afj	E130307C13	H2A histone family, member J	protein-coding
chr2	180118979	180119510	promoter-TSS (NM_144500)	promoter-TSS (NM_144500)	-62	NM_144500	228983	Mm.253578	NM_144500	ENSMUSG00000039050	Osbpl2	C130070J12Rik|ORP-2|Orp2	oxysterol binding protein-like 2	protein-coding
chr17	28313293	28313999	non-coding (NR_028297, exon 1 of 10)	non-coding (NR_028297, exon 1 of 10)	116	NM_001163820	72775	Mm.201859	NM_028348	ENSMUSG00000007570	Fance	2810451D06Rik|AI415634|AW209126	Fanconi anemia, complementation group E	protein-coding
chr4	134703959	134704806	promoter-TSS (NM_207237)	promoter-TSS (NM_207237)	-92	NM_207237	230815	Mm.18905	NM_207237	ENSMUSG00000037306	Man1c1	AI593348	mannosidase, alpha, class 1C, member 1	protein-coding
chr5	120588441	120589092	promoter-TSS (NM_029408)	promoter-TSS (NM_029408)	-153	NM_145853	252972	Mm.114054	NM_145853	ENSMUSG00000032741	Tpcn1	5730403B01Rik|Tpc1|mKIAA1169	two pore channel 1	protein-coding
chrY	90818863	90819274	Intergenic	Intergenic	20338	NR_137283	654820	Mm.34441	NM_001039559	ENSMUSG00000072844	G530011O06Rik	-	RIKEN cDNA G530011O06 gene	ncRNA
chr4	146579844	146581146	Intergenic	CpG	-33622	NR_045468	67524	Mm.444300	NR_045468	ENSMUSG00000086046	1700095A21Rik	-	RIKEN cDNA 1700095A21 gene	ncRNA
chr7	35961557	35961852	Intergenic	ORR1B1|LTR|ERVL-MaLR	-158715	NM_177739	668501	Mm.286296	NM_177739	ENSMUSG00000044452	Zfp507	1810022O10Rik|A230056M16Rik|AL024009|AU021817|BB105092|Gm480|Znf507|mKIAA1084	zinc finger protein 507	protein-coding
chrX	67379539	67380478	Intergenic	L1Md_T|LINE|L1	313554	NM_001163195	666842	Mm.422933	NM_001163195	ENSMUSG00000079577	Gm14692	-	predicted gene 14692	protein-coding
chr8	121822026	121827012	intron (NM_145605, intron 1 of 11)	intron (NM_145605, intron 1 of 11)	5050	NM_145605	234825	Mm.209329	NM_145605	ENSMUSG00000040263	Klhdc4	AA408426|AV352552|BC012312|G430025P05Rik	kelch domain containing 4	protein-coding
chr8	92355810	92356569	promoter-TSS (NR_033641)	promoter-TSS (NR_033641)	-69	NR_033641	71296	Mm.86664	NR_033641	ENSMUSG00000031736	Crnde	4933436C20Rik	colorectal neoplasia differentially expressed (non-protein coding)	ncRNA
chr18	34931431	34932382	promoter-TSS (NM_144866)	promoter-TSS (NM_144866)	97	NM_144866	225363	Mm.329353	NM_144866	ENSMUSG00000024360	Etf1	AI463371|D6Ertd109e|ERF|ERF1|SUP45L1|TB3-1	eukaryotic translation termination factor 1	protein-coding
chr15	100614830	100616112	promoter-TSS (NM_011873)	promoter-TSS (NM_011873)	-191	NM_011873	23994	Mm.486175	NM_011873	ENSMUSG00000000346	Dazap2	AI314727|Brbp|Gcap28|Prtb|gt6-12|mKIAA0058	DAZ associated protein 2	protein-coding
chr10	80577145	80578100	promoter-TSS (NM_078477)	promoter-TSS (NM_078477)	-326	NM_078477	118445	Mm.41513	NM_078477	ENSMUSG00000035397	Klf16	AI843742|BTEB4|DRRF	Kruppel-like factor 16	protein-coding
chr6	67266520	67267836	exon (NM_001113564, exon 1 of 8)	exon (NM_001113564, exon 1 of 8)	199	NM_001113565	66870	Mm.240490	NM_025814	ENSMUSG00000036371	Serbp1	1200009K13Rik|9330147J08Rik|AL022786|Pairbp1	serpine1 mRNA binding protein 1	protein-coding
chr8	9660152	9660428	intron (NM_173446, intron 1 of 2)	intron (NM_173446, intron 1 of 2)	110733	NM_173446	270028	Mm.268163	NM_173446	ENSMUSG00000079157	Fam155a	6430500D16|AW121567|Tmem28	family with sequence similarity 155, member A	protein-coding
chr16	36874801	36875620	promoter-TSS (NM_134111)	promoter-TSS (NM_134111)	-384	NM_134111	106389	Mm.432078	NM_134111	ENSMUSG00000022838	Eaf2	AW048865|FESTA-L|FESTA-S|Festa|Traits|U19	ELL associated factor 2	protein-coding
chr6	122308360	122309220	promoter-TSS (NM_010749)	promoter-TSS (NM_010749)	70	NM_010749	17113	Mm.249225	NM_010749	ENSMUSG00000007458	M6pr	CD-MPR|Mpr46	mannose-6-phosphate receptor, cation dependent	protein-coding
chr14	10495715	10497101	intron (NM_001308285, intron 4 of 9)	L1Md_T|LINE|L1	-42950	NM_001308286	14198	Mm.397619	NM_010210	ENSMUSG00000060579	Fhit	AW045638|Fra14A2	fragile histidine triad gene	protein-coding
chr10	40348747	40349747	promoter-TSS (NM_001168304)	promoter-TSS (NM_001168304)	-61	NM_001291816	78334	Mm.200924	NM_198164	ENSMUSG00000038481	Cdk19	2700084L06Rik|AI845279|AW228747|CDK11|Cdc2l6|mKIAA1028	cyclin-dependent kinase 19	protein-coding
chr7	65719202	65720175	Intergenic	L1Md_T|LINE|L1	26271	NM_026795	68634	Mm.476828	NM_026795	ENSMUSG00000078681	Tm2d3	1110025I09Rik|5930422O05Rik|Blp2	TM2 domain containing 3	protein-coding
chr17	83167971	83170310	Intergenic	SUBTEL_sa|Satellite|Satellite	-46143	NM_134117	106522	Mm.311974	NM_134117	ENSMUSG00000024247	Pkdcc	AI115348|AW548124|Adtk1|ESTM17|MAd1|Sgk493|Vlk|X83346	protein kinase domain containing, cytoplasmic	protein-coding
chr17	33915793	33916481	promoter-TSS (NM_020625)	promoter-TSS (NM_020625)	-39	NM_020625	81630	Mm.482096	NM_020625	ENSMUSG00000051390	Zbtb22	1110008J20Rik|AI265210|AI415166|Bing1|Zfp297	zinc finger and BTB domain containing 22	protein-coding
chr5	8622293	8623404	5' UTR (NM_001359961, exon 1 of 9)	5' UTR (NM_001359961, exon 1 of 9)	104	NM_198620	242819	Mm.332192	NM_198620	ENSMUSG00000040570	Rundc3b	Gm440	RUN domain containing 3B	protein-coding
chrY	43069485	43070092	Intergenic	L1Md_F|LINE|L1	139465	NR_038299	100041346	Mm.426191	NR_038299	ENSMUSG00000101005	Gm20871	-	Sycp3 like Y-linked pseudogene	pseudo
chr7	43177360	43178055	intron (NM_001034893, intron 1 of 3)	intron (NM_001034893, intron 1 of 3)	117	NM_001034893	668620	Mm.388871	NM_001034893	ENSMUSG00000064194	Zfp936	EG435970|EG668620|Gm9272|I1C0022H11Rik	zinc finger protein 936	protein-coding
chrX	122724594	122725780	Intergenic	L1Md_T|LINE|L1	-327802	NM_138742	54561	Mm.490573	NM_138742	ENSMUSG00000055733	Nap1l3	MB20	nucleosome assembly protein 1-like 3	protein-coding
chr5	34287926	34288757	promoter-TSS (NM_001370805)	promoter-TSS (NM_001370805)	-17	NM_001015039	231125	Mm.113388	NM_001015039	ENSMUSG00000037224	Zfyve28	9630058O20Rik|Gm146|mKIAA1643	zinc finger, FYVE domain containing 28	protein-coding
chr16	5146653	5147163	promoter-TSS (NM_001127725)	promoter-TSS (NM_001127725)	-201	NM_001127725	665119	Mm.102072	NM_001127725	ENSMUSG00000091712	Sec14l5	-	SEC14-like lipid binding 5	protein-coding
chr13	92610722	92611359	promoter-TSS (NM_172588)	promoter-TSS (NM_172588)	-98	NM_172588	218442	Mm.297970	NM_172588	ENSMUSG00000021703	Serinc5	A130038L21Rik|AIGP3|C86123|TPO1	serine incorporator 5	protein-coding
chr7	80534742	80535360	promoter-TSS (NM_007550)	promoter-TSS (NM_007550)	-53	NM_007550	12144	Mm.12932	NM_007550	ENSMUSG00000030528	Blm	-	Bloom syndrome, RecQ like helicase	protein-coding
chr18	49979017	49979661	promoter-TSS (NM_001177760)	promoter-TSS (NM_001177760)	-88	NM_001177760	106869	Mm.27740	NM_134131	ENSMUSG00000062210	Tnfaip8	AA987150|E130304C20Rik|Gg2-1|Gm10539|Nded|Ssc-2|Tipe	tumor necrosis factor, alpha-induced protein 8	protein-coding
chr15	52843643	52845026	Intergenic	L1Md_T|LINE|L1	131889	NM_027212	69790	Mm.195562	NM_027212	ENSMUSG00000038622	Med30	1810038N03Rik|2510044J04Rik|TRAP25|Thrap6	mediator complex subunit 30	protein-coding
chr11	21571777	21572410	promoter-TSS (NM_008618)	promoter-TSS (NM_008618)	-159	NM_001316675	17449	Mm.212703	NM_008618	ENSMUSG00000020321	Mdh1	B230377B03Rik|D17921|MDH-s|MDHA|Mor-2|Mor2	malate dehydrogenase 1, NAD (soluble)	protein-coding
chr17	84564487	84565197	intron (NM_177606, intron 7 of 29)	intron (NM_177606, intron 7 of 29)	52947	NM_001357986	213556	Mm.215159	NM_177606	ENSMUSG00000040852	Plekhh2	AI256725|E030001K05|mKIAA2028	pleckstrin homology domain containing, family H (with MyTH4 domain) member 2	protein-coding
chr11	20249094	20250010	promoter-TSS (NM_172260)	promoter-TSS (NM_172260)	-128	NM_172260	216543	Mm.260314	NM_172260	ENSMUSG00000044066	Cep68	6030463E10Rik|AI481761|BC027174|Kiaa0582	centrosomal protein 68	protein-coding
chr9	65579855	65580619	promoter-TSS (NM_153119)	promoter-TSS (NM_153119)	-150	NM_153119	102595	Mm.247303	NM_153119	ENSMUSG00000050721	Plekho2	AI840980|Plekhq1	pleckstrin homology domain containing, family O member 2	protein-coding
chr11	97744373	97745356	promoter-TSS (NM_054051)	promoter-TSS (NM_054051)	-33	NR_106180	102466256		NR_106180	ENSMUSG00000098919	Mir8102	Gm27795|mmu-mir-8102	microRNA 8102	ncRNA
chr2	34771582	34772600	promoter-TSS (NM_022310)	promoter-TSS (NM_022310)	1	NM_022310	14828	Mm.330160	NM_022310	ENSMUSG00000026864	Hspa5	AL022860|AU019543|Bip|D2Wsu141e|D2Wsu17e|Grp78|Hsce70|SEZ-7|Sez7|baffled|mBiP	heat shock protein 5	protein-coding
chr11	48816287	48817594	5' UTR (NM_145377, exon 1 of 6)	5' UTR (NM_145377, exon 1 of 6)	451	NM_145377	211007	Mm.794	NM_145377	ENSMUSG00000040365	Trim41	AW552703|BC020156|R75223|RINCK	tripartite motif-containing 41	protein-coding
chr5	142701259	142702194	promoter-TSS (NM_146257)	promoter-TSS (NM_146257)	-375	NM_146257	243328	Mm.125942	NM_146257	ENSMUSG00000050822	Slc29a4	ENT4|mPMAT	solute carrier family 29 (nucleoside transporters), member 4	protein-coding
chr12	83921489	83922241	promoter-TSS (NR_073564)	promoter-TSS (NR_073564)	69	NR_073563	18222	Mm.4390	NM_010949	ENSMUSG00000021224	Numb	Nb	NUMB endocytic adaptor protein	protein-coding
chrX	148180458	148181083	promoter-TSS (NM_011022)	promoter-TSS (NM_011022)	46	NM_001081648	434864	Mm.484933	NM_001081648	ENSMUSG00000072930	Gm15107	Ott-like	predicted gene 15107	protein-coding
chr3	16182954	16183657	5' UTR (NM_001358043, exon 1 of 5)	5' UTR (NM_001358043, exon 1 of 5)	140	NM_172677	229096	Mm.23834	NM_172677	ENSMUSG00000047213	Ythdf3	9130022A11Rik	YTH N6-methyladenosine RNA binding protein 3	protein-coding
chr4	132048321	132049433	5' UTR (NM_001128606, exon 1 of 18)	5' UTR (NM_001128606, exon 1 of 18)	201	NM_001128606	269587	Mm.30038	NM_183428	ENSMUSG00000028906	Epb41	4.1R|AI415518|D4Ertd442e|Elp-1|Elp1|Epb4.1|mKIAA4056	erythrocyte membrane protein band 4.1	protein-coding
chr9	100643085	100643736	promoter-TSS (NM_009282)	promoter-TSS (NM_009282)	-38	NM_009282	20842	Mm.42135	NM_009282	ENSMUSG00000037286	Stag1	AU045003|SA-1|Scc3	stromal antigen 1	protein-coding
chr11	4441064	4441387	promoter-TSS (NM_029458)	promoter-TSS (NM_029458)	-143	NM_029458	75828	Mm.159592	NM_029458	ENSMUSG00000020419	Hormad2	4930529M09Rik	HORMA domain containing 2	protein-coding
chr16	48496453	48497813	intron (NM_010816, intron 9 of 26)	L1Md_T|LINE|L1	65896	NM_010816	17450	Mm.250060	NM_010816	ENSMUSG00000022652	Morc1	Morc	microrchidia 1	protein-coding
chr12	20415219	20416037	Intergenic	CpG	400151	NR_015521	69513	Mm.273972	NR_015521	ENSMUSG00000099759	1700030C10Rik	-	RIKEN cDNA 1700030C10 gene	ncRNA
chr12	101142239	101143664	Intergenic	L1Md_T|LINE|L1	-2658	NR_033653	74947	Mm.488905	NR_033653	ENSMUSG00000092054	Kif4-ps	4930463M05Rik|Kif4b	kinesin family member 4, pseudogene	pseudo
chr7	59228353	59229720	5' UTR (NM_011668, exon 1 of 13)	5' UTR (NM_011668, exon 1 of 13)	286	NM_011668	22215	Mm.9002	NM_011668	ENSMUSG00000025326	Ube3a	4732496B02|5830462N02Rik|A130086L21Rik|Hpve6a	ubiquitin protein ligase E3A	protein-coding
chr1	7088507	7089275	promoter-TSS (NM_183028)	promoter-TSS (NM_183028)	-29	NM_183028	319263	Mm.21539	NM_183028	ENSMUSG00000051285	Pcmtd1	8430411F12Rik|A030012M09Rik	protein-L-isoaspartate (D-aspartate) O-methyltransferase domain containing 1	protein-coding
chr13	96670424	96671393	promoter-TSS (NM_001360165)	promoter-TSS (NM_001360165)	28	NM_001360166	15357	Mm.316652	NM_008255	ENSMUSG00000021670	Hmgcr	HMG-CoAR|Red	3-hydroxy-3-methylglutaryl-Coenzyme A reductase	protein-coding
chr11	32008246	32008486	intron (NM_001290680, intron 2 of 4)	intron (NM_001290680, intron 2 of 4)	7089	NM_001290681	18197	Mm.3304	NM_008741	ENSMUSG00000020297	Nsg2	P19	neuron specific gene family member 2	protein-coding
chr1	28287637	28288813	Intergenic	L1Md_T|LINE|L1	404179	NR_151583	433281	Mm.329306	NR_151583	ENSMUSG00000101514	Gm5524	AI875557|EG433281	predicted gene 5524	ncRNA
chr13	6883871	6884729	Intergenic	L1Md_T|LINE|L1	-235529	NM_001291071	56421	Mm.273874	NM_019703	ENSMUSG00000021196	Pfkp	1200015H23Rik|9330125N24Rik|ATP-PFK|PFK-C|PFK-P	phosphofructokinase, platelet	protein-coding
chr5	140484088	140484315	Intergenic	ZP3AR|Satellite|Satellite	-21408	NM_021528	59031	Mm.28934	NM_021528	ENSMUSG00000036599	Chst12	AI595374|C4S-2|C4ST2	carbohydrate sulfotransferase 12	protein-coding
chr14	42811993	42812560	Intergenic	L1Md_A|LINE|L1	-14341	NM_001244671	100042055	Mm.429109	NM_001244671	ENSMUSG00000095226	Gm10377	-	predicted gene 10377	protein-coding
chr13	65660861	65662325	Intergenic	Intergenic	-312999	NM_001371118
chr15	59314733	59315280	promoter-TSS (NM_009270)	promoter-TSS (NM_009270)	-86	NM_009270	20775	Mm.296169	NM_009270	ENSMUSG00000022351	Sqle	AI323792	squalene epoxidase	protein-coding
chr14	29968142	29968813	promoter-TSS (NM_019979)	promoter-TSS (NM_019979)	97	NM_019979	80795	Mm.104491	NM_019979	ENSMUSG00000042682	Selenok	1110001C03Rik|AA673253|HSPC030|Hsp30|Selk	selenoprotein K	protein-coding
chr5	134688391	134689249	promoter-TSS (NM_010717)	promoter-TSS (NM_010717)	-230	NM_010717	16885	Mm.15409	NM_010717	ENSMUSG00000029674	Limk1	KIZ-1|LIMK-1|Limk	LIM-domain containing, protein kinase	protein-coding
chr16	11065854	11066647	promoter-TSS (NM_009223)	promoter-TSS (NM_009223)	-48	NM_009223	20621	Mm.325800	NM_009223	ENSMUSG00000037972	Snn	2810407J07Rik|AI848521|AW547286	stannin	protein-coding
chr10	51744287	51744563	Intergenic	L1Md_T|LINE|L1	12769	NR_045158	71090	Mm.72588	NM_027670	ENSMUSG00000062224	4933411G06Rik	-	Sumo1 pseudogene	pseudo
chr9	54916807	54917677	promoter-TSS (NM_177351)	promoter-TSS (NM_177351)	-48	NM_177351	235386	Mm.259334	NM_177351	ENSMUSG00000035878	Hykk	Agphd1|C630028N24Rik	hydroxylysine kinase 1	protein-coding
chr10	85916394	85917280	promoter-TSS (NM_001302887)	promoter-TSS (NM_001302887)	-108	NM_181650	72843	Mm.25307	NM_181650	ENSMUSG00000035529	Prdm4	1700031E19Rik|2810470D21Rik|AW552272|SC-1|SC1	PR domain containing 4	protein-coding
chr3	131564502	131565124	promoter-TSS (NM_001289479)	promoter-TSS (NM_001289479)	45	NM_011863	23971	Mm.244912	NM_011863	ENSMUSG00000028032	Papss1	AI325286|Asapk|SK1	3'-phosphoadenosine 5'-phosphosulfate synthase 1	protein-coding
chr15	78173927	78174480	promoter-TSS (NM_025931)	promoter-TSS (NM_025931)	-122	NM_025931	67042	Mm.30191	NM_025931	ENSMUSG00000016637	Ift27	2600013G09Rik|Rabl4	intraflagellar transport 27	protein-coding
chr3	153944182	153944830	5' UTR (NM_007382, exon 1 of 12)	5' UTR (NM_007382, exon 1 of 12)	137	NM_007382	11364	Mm.10530	NM_007382	ENSMUSG00000062908	Acadm	AU018656|MCAD	acyl-Coenzyme A dehydrogenase, medium chain	protein-coding
chr8	70796856	70797820	promoter-TSS (NR_106099)	promoter-TSS (NR_106099)	-797	NR_106099	102466823		NR_106099	ENSMUSG00000099031	Mir7240	Gm27487|mmu-mir-7240	microRNA 7240	ncRNA
chr8	13785399	13786259	exon (NM_025924, exon 1 of 9)	exon (NM_025924, exon 1 of 9)	214	NM_025924	67031	Mm.44858	NM_025924	ENSMUSG00000038398	Upf3a	2600001C03Rik|4930546M19Rik|RENT3A|UPF3	UPF3 regulator of nonsense transcripts homolog A (yeast)	protein-coding
chr16	43889543	43890186	promoter-TSS (NM_027801)	promoter-TSS (NM_027801)	-38	NM_027801	212153	Mm.209835	NM_027801	ENSMUSG00000022701	Ccdc191	2610015P09Rik|8430422M09Rik|AU040712	coiled-coil domain containing 191	protein-coding
chr1	176813623	176814937	promoter-TSS (NM_001357390)	promoter-TSS (NM_001357390)	-327	NM_001368872	545389	Mm.269991	NM_001024722	ENSMUSG00000057335	Cep170	4933426L22Rik|A330004A13Rik|AI195353	centrosomal protein 170	protein-coding
chr2	122028275	122028981	promoter-TSS (NM_144545)	promoter-TSS (NM_144545)	45	NM_001256055	100042807	Mm.329403	NM_001256055	ENSMUSG00000043424	Eif3j2	Eif3j-2|Gm9781|eIF3 p35|eIF3j-B	eukaryotic translation initiation factor 3, subunit J2	protein-coding
chr15	36608586	36609691	promoter-TSS (NM_008774)	promoter-TSS (NM_008774)	-165	NM_008774	18458	Mm.371570	NM_008774	ENSMUSG00000022283	Pabpc1	PABP|Pabp1|PabpI|Pabpl1|ePAB	poly(A) binding protein, cytoplasmic 1	protein-coding
chr5	15612094	15612973	Intergenic	Lx2A1|LINE|L1	-6566	NM_025759	360220	Mm.425235	NM_025759	ENSMUSG00000070933	Speer4d	4933431D05Rik|SPEER-4D	spermatogenesis associated glutamate (E)-rich protein 4D	protein-coding
chr3	85887263	85887877	promoter-TSS (NM_177130)	promoter-TSS (NM_177130)	-52	NM_177130	320302	Mm.482978	NM_177130	ENSMUSG00000031286	Glt28d2	4732486J07Rik|Glt28d1l	glycosyltransferase 28 domain containing 2	protein-coding
chr3	96238618	96240519	promoter-TSS (NM_054045)	promoter-TSS (NM_054045)	-426	NM_178216	15077	Mm.422680	NM_178216	ENSMUSG00000093769	Hist2h3c1	BE691662|H3-615|H3f2|Hist2h3ca1	histone cluster 2, H3c1	protein-coding
chr11	30025793	30026302	promoter-TSS (NM_146016)	promoter-TSS (NM_146016)	-14	NM_146016	237711	Mm.445271	NM_146016	ENSMUSG00000044072	Eml6	2900083P10Rik|C230094A16Rik|EMAP-6	echinoderm microtubule associated protein like 6	protein-coding
chrX	20950347	20951064	promoter-TSS (NM_007922)	promoter-TSS (NM_007922)	-97	NM_007922	13712	Mm.405823	NM_007922	ENSMUSG00000009406	Elk1	Elk-1	ELK1, member of ETS oncogene family	protein-coding
chr14	55560129	55560928	promoter-TSS (NM_001199009)	promoter-TSS (NM_001199009)	-395	NM_001199009	28199	Mm.11535	NM_133734	ENSMUSG00000022214	Dcaf11	0710008A13Rik|C76035|D14Ucla1|Dacf11|GLO14|Wdr23	DDB1 and CUL4 associated factor 11	protein-coding
chr12	78225845	78227180	promoter-TSS (NM_172952)	promoter-TSS (NM_172952)	-143	NM_172952	268566	Mm.341742	NM_145965	ENSMUSG00000047454	Gphn	5730552E08Rik|AI662856|BC027112|C230040D23|GPH|GPHRYN|geph	gephyrin	protein-coding
chr7	122066869	122067513	promoter-TSS (NM_138589)	promoter-TSS (NM_138589)	-7	NM_138589	28018	Mm.282122	NM_138589	ENSMUSG00000030870	Ubfd1	AI467302|D7Wsu105e|D7Wsu128e|Ubph	ubiquitin family domain containing 1	protein-coding
chr5	20881450	20882649	promoter-TSS (NM_172992)	promoter-TSS (NM_172992)	75	NM_172992	68770	Mm.86410	NM_172992	ENSMUSG00000039987	Phtf2	1110054G21Rik|9530062N20Rik|AI447096|C77923	putative homeodomain transcription factor 2	protein-coding
chr9	56041690	56042432	exon (NM_001278274, exon 1 of 2)	exon (NM_001278274, exon 1 of 2)	216	NM_001278274	26611	Mm.1782	NM_011992	ENSMUSG00000032320	Rcn2	AA408742|Tcbp49	reticulocalbin 2	protein-coding
chr13	55444638	55445518	promoter-TSS (NM_001286066)	promoter-TSS (NM_001286066)	6	NM_001286063	26385	Mm.10193	NM_011938	ENSMUSG00000074886	Grk6	Gprk6	G protein-coupled receptor kinase 6	protein-coding
chr7	101933596	101934306	promoter-TSS (NM_001162973)	promoter-TSS (NM_001162973)	-94	NM_001162974	69358	Mm.214841	NM_027053	ENSMUSG00000064307	Lrrc51	1700008D07Rik|Lrtomt	leucine rich repeat containing 51	protein-coding
chr1	85597471	85599636	intron (NM_030194, intron 1 of 11)	intron (NM_030194, intron 1 of 11)	257	NM_030194	109032	Mm.335802	NM_030194	ENSMUSG00000070034	Sp110	5031415C07Rik|52kDa|5830484A20Rik|Ifi75|Ipr1	Sp110 nuclear body protein	protein-coding
chr1	25662068	25663236	intron (NM_175642, intron 2 of 30)	L1Md_T|LINE|L1	167055	NM_175642	210933	Mm.336569	NM_175642	ENSMUSG00000033569	Adgrb3	A830096D10Rik|Bai3	adhesion G protein-coupled receptor B3	protein-coding
chr5	94045710	94047353	Intergenic	L1Md_T|LINE|L1	24014	NM_001270457	666203	Mm.380154	NM_001270457	ENSMUSG00000096139	Gm7978	EG666203	predicted gene 7978	protein-coding
chrX	67013415	67014394	Intergenic	L1Md_T|LINE|L1	-174779	NR_030149	723888		NR_030149	ENSMUSG00000070071	Mir465	Mirn465|mir-465a|mmu-mir-465	microRNA 465	ncRNA
chr17	50292699	50293832	intron (NM_001277863, intron 1 of 9)	CpG	355	NM_010021	13164	Mm.280641	NM_010021	ENSMUSG00000010592	Dazl	Daz-like|Dazh|Dazl1|Dazla|Tpx-2|Tpx2	deleted in azoospermia-like	protein-coding
chr8	70698246	70699321	5' UTR (NM_010592, exon 1 of 1)	5' UTR (NM_010592, exon 1 of 1)	1044	NM_010592	16478	Mm.419851	NM_010592	ENSMUSG00000071076	Jund	Jund1	jun D proto-oncogene	protein-coding
chr9	44305347	44306225	promoter-TSS (NM_172162)	promoter-TSS (NM_172162)	-115	NM_172162	102423	Mm.24570	NM_172162	ENSMUSG00000032119	Hinfp	AA589481|HiNF-P|Mizf	histone H4 transcription factor	protein-coding
chr1	7397641	7398652	Intergenic	CpG	309226	NM_183028	319263	Mm.21539	NM_183028	ENSMUSG00000051285	Pcmtd1	8430411F12Rik|A030012M09Rik	protein-L-isoaspartate (D-aspartate) O-methyltransferase domain containing 1	protein-coding
chr10	80675746	80676969	promoter-TSS (NM_021462)	promoter-TSS (NM_021462)	-64	NM_021462	17347	Mm.42126	NM_021462	ENSMUSG00000020190	Mknk2	2010016G11Rik|Gprk7|Mnk2	MAP kinase-interacting serine/threonine kinase 2	protein-coding
chr15	96787997	96788319	Intergenic	ORR1A4|LTR|ERVL-MaLR	-88430	NM_001355633	67760	Mm.46754	NM_175121	ENSMUSG00000022462	Slc38a2	5033402L14Rik|AI316867|ATA2|SAT2|mKIAA1382	solute carrier family 38, member 2	protein-coding
chrX	121739068	121740387	Intergenic	L1Md_T|LINE|L1	657658	NM_138742	54561	Mm.490573	NM_138742	ENSMUSG00000055733	Nap1l3	MB20	nucleosome assembly protein 1-like 3	protein-coding
chr5	63968493	63969179	promoter-TSS (NM_145923)	promoter-TSS (NM_145923)	61	NM_145923	100532	Mm.243632	NM_145923	ENSMUSG00000047881	Rell1	AA536743	RELT-like 1	protein-coding
chr4	153869094	153869405	Intergenic	Intergenic	81227	NR_040670	407793	Mm.260950	NR_040670		BC039966	-	cDNA sequence BC039966	ncRNA
chr7	10471403	10472390	Intergenic	L1Md_T|LINE|L1	23485	NM_009577	22775	Mm.49441	NM_009577	ENSMUSG00000030393	Zik1	-	zinc finger protein interacting with K protein 1	protein-coding
chr2	30391977	30392884	non-coding (NR_110963, exon 1 of 5)	non-coding (NR_110963, exon 1 of 5)	176	NM_020329	57170	Mm.285167	NM_020329	ENSMUSG00000026856	Dolpp1	0610011H20Rik|AB030189|LSFR2	dolichyl pyrophosphate phosphatase 1	protein-coding
chr10	22058202	22059119	Intergenic	CpG	9419	NM_053264	114671	Mm.288194	NM_053264	ENSMUSG00000069712	4930444G20Rik	-	RIKEN cDNA 4930444G20 gene	protein-coding
chr7	75995231	75996653	Intergenic	L1Md_T|LINE|L1	147604	NM_029652	207952	Mm.206223	NM_029652	ENSMUSG00000055652	Klhl25	2810402K13Rik|BC027373|Enc-1	kelch-like 25	protein-coding
chr7	44552909	44554009	intron (NM_009473, intron 2 of 9)	intron (NM_009473, intron 2 of 9)	506	NM_001285518	22260	Mm.968	NM_009473	ENSMUSG00000060601	Nr1h2	AI194859|LXR|LXRB|LXRBSV|LXRbeta|NER1|OR-1|RIP15|UR|Unr|Unr2	nuclear receptor subfamily 1, group H, member 2	protein-coding
chr14	36055754	36056052	Intergenic	Intergenic	-39062	NM_175008	218921	Mm.212464	NM_175008	ENSMUSG00000096405	4930474N05Rik	-	RIKEN cDNA 4930474N05 gene	protein-coding
chr5	34369289	34369959	promoter-TSS (NM_001243123)	promoter-TSS (NM_001243123)	-309	NM_001243123	231128	Mm.286885	NM_001030306	ENSMUSG00000037210	Fam193a	-	family with sequence homology 193, member A	protein-coding
chr2	79936728	79937916	intron (NM_001159582, intron 2 of 15)	L1Md_T|LINE|L1	-28923	NM_001355144	18573	Mm.40678	NM_016744	ENSMUSG00000059173	Pde1a	AI987702|AW125737	phosphodiesterase 1A, calmodulin-dependent	protein-coding
chr5	124327527	124328257	promoter-TSS (NM_001277867)	promoter-TSS (NM_001277867)	80	NR_102690	269702	Mm.60224	NM_001081323	ENSMUSG00000038126	Mphosph9	4930548D04Rik|9630025B04Rik|AW413446|AW547060|B930097C17Rik|C87456|MPP-9|MPP9	M-phase phosphoprotein 9	protein-coding
chr15	36792405	36794596	5' UTR (NM_011740, exon 2 of 7)	5' UTR (NM_011740, exon 2 of 7)	1038	NM_001253805	22631	Mm.3360	NM_011740	ENSMUSG00000022285	Ywhaz	1110013I11Rik|14-3-3zeta|AI596267|AL022924|AU020854	tyrosine 3-monooxygenase/tryptophan 5-monooxygenase activation protein, zeta polypeptide	protein-coding
chr18	90469958	90472277	Intergenic	L1Md_T|LINE|L1	-39037	NM_198295	67988	Mm.268041	NM_198295	ENSMUSG00000024614	Tmx3	6430411B10Rik|A730024F05Rik|AV259382|Txndc10|mKIAA1830	thioredoxin-related transmembrane protein 3	protein-coding
chr2	92388923	92389652	intron (NM_001202445, intron 2 of 11)	CpG	-1841	NR_105966	102466783		NR_105966	ENSMUSG00000099093	Mir7000	Gm27338|mmu-mir-7000	microRNA 7000	ncRNA
chr9	108560173	108560623	promoter-TSS (NM_011830)	promoter-TSS (NM_011830)	-38	NM_011830	23918	Mm.6065	NM_011830	ENSMUSG00000062867	Impdh2	IMPD|IMPD 2|IMPDH-II	inosine monophosphate dehydrogenase 2	protein-coding
chr1	188341862	188342645	intron (NM_021408, intron 3 of 70)	L1Md_T|LINE|L1	79415	NM_021408	22283	Mm.331238	NM_021408	ENSMUSG00000026609	Ush2a	A930011D15Rik|A930037M10Rik|Gm676|Gm983|Mush2a|Ushrn	usherin	protein-coding
chr8	70659637	70660516	promoter-TSS (NM_023217)	promoter-TSS (NM_023217)	-338	NM_023217	66522	Mm.154906	NM_023217	ENSMUSG00000056204	Pgpep1	2810003H13Rik|Gm19458|PAP-I|PGP|PGP-I|PGPI|Pcp	pyroglutamyl-peptidase I	protein-coding
chrX	148314417	148314777	promoter-TSS (NM_011022).5	promoter-TSS (NM_011022).5	67	NM_011022	18422	Mm.420007	NM_011022	ENSMUSG00000094885	Ott	AV272316	ovary testis transcribed	protein-coding
chr5	134395032	134395712	intron (NM_001081470, intron 9 of 26)	ZP3AR|Satellite|Satellite	60890	NM_001081465	57080	Mm.332735	NM_020331	ENSMUSG00000023079	Gtf2ird1	1700012P16Rik|BEN|Cream1|ESTM9|GTF3|Gtf2il|MusTRD1|Tg(Alb1-Myc)166.8Sst|WBSCR11|X83320	general transcription factor II I repeat domain-containing 1	protein-coding
chr8	45999398	46000382	promoter-TSS (NM_001039562)	promoter-TSS (NM_001039562)	-40	NM_001039562	654824	Mm.334517	NM_001039562	ENSMUSG00000050914	Ankrd37	-	ankyrin repeat domain 37	protein-coding
chr12	8921513	8922339	5' UTR (NM_008640, exon 1 of 7)	5' UTR (NM_008640, exon 1 of 7)	619	NM_008640	17775	Mm.30071	NM_008640	ENSMUSG00000020585	Laptm4a	AA286466|LAPTM4|MTP|Mtrp|mKIAA0108	lysosomal-associated protein transmembrane 4A	protein-coding
chr17	20944890	20945798	promoter-TSS (NM_016891)	promoter-TSS (NM_016891)	-110	NM_016891	51792	Mm.294138	NM_016891	ENSMUSG00000007564	Ppp2r1a	6330556D22Rik|PP2A|PR65	protein phosphatase 2, regulatory subunit A, alpha	protein-coding
chr16	36827896	36828746	promoter-TSS (NM_001113401)	promoter-TSS (NM_001113401)	-62	NM_001113401	106389	Mm.432078	NM_134111	ENSMUSG00000022838	Eaf2	AW048865|FESTA-L|FESTA-S|Festa|Traits|U19	ELL associated factor 2	protein-coding
chrY	5708709	5709500	Intergenic	Intergenic	1458673	NM_001101623	100040160	Mm.482062	NM_001101623	ENSMUSG00000094081	Gm20826	-	predicted gene, 20826	protein-coding
chr4	42999671	43000918	5' UTR (NM_009503, exon 1 of 17)	5' UTR (NM_009503, exon 1 of 17)	213	NM_009503	269523	Mm.245976	NM_009503	ENSMUSG00000028452	Vcp	3110001E05|CDC48|p97|p97/VCP	valosin containing protein	protein-coding
chr17	34849870	34850565	promoter-TSS (NM_138580)	promoter-TSS (NM_138580)	-13	NM_021337	108077	Mm.18845	NM_021337	ENSMUSG00000040356	Skiv2l	4930534J06Rik|AW214248|Ddx13|SKI|Ski2w	superkiller viralicidic activity 2-like (S. cerevisiae)	protein-coding
chr7	45923004	45924466	promoter-TSS (NM_001364169)	promoter-TSS (NM_001364169)	-480	NM_001364168	211535	Mm.227539	NM_001033243	ENSMUSG00000040189	Ccdc114	-	coiled-coil domain containing 114	protein-coding
chr17	25832644	25833538	promoter-TSS (NM_019719)	promoter-TSS (NM_019719)	-172	NM_019719	56424	Mm.277599	NM_019719	ENSMUSG00000039615	Stub1	0610033N24Rik|2210017D18Rik|2310040B03Rik|AW046544|Chip	STIP1 homology and U-Box containing protein 1	protein-coding
chr11	23665557	23666461	promoter-TSS (NR_156455)	promoter-TSS (NR_156455)	17	NM_028304	74467	Mm.29536	NM_028304	ENSMUSG00000020280	Pus10	2810013G11Rik|4933435A13Rik|AU014648|C77560|Ccdc139	pseudouridylate synthase 10	protein-coding
chr5	28070482	28072044	promoter-TSS (NM_153526)	promoter-TSS (NM_153526)	-149	NM_153526	231070	Mm.30221	NM_153526	ENSMUSG00000045294	Insig1	1810013C12Rik|Insig-1	insulin induced gene 1	protein-coding
chr1	93803557	93804435	promoter-TSS (NM_025454)	promoter-TSS (NM_025454)	31	NM_025454	66262	Mm.64065	NM_025454	ENSMUSG00000026283	Ing5	1700001C14Rik|1700027H23Rik|1810018M11Rik|AI225768	inhibitor of growth family, member 5	protein-coding
chr1	23255978	23256936	Intergenic	CpG	-15812	NR_029533	387225		NR_029533	ENSMUSG00000065405	Mir30a	Mirn30a|mir-30a|mmu-mir-30a	microRNA 30a	ncRNA
chr9	22475453	22475848	promoter-TSS (NM_181316)	promoter-TSS (NM_181316)	-65	NM_181316	319845	Mm.176725	NM_178415	ENSMUSG00000035919	Bbs9	E130103I17Rik	Bardet-Biedl syndrome 9 (human)	protein-coding
chr9	106477027	106477512	promoter-TSS (NM_145619)	promoter-TSS (NM_145619)	-40	NM_145620	27966	Mm.239997	NM_145620	ENSMUSG00000041506	Rrp9	55kDa|D19435|D9Wsu10e|Rnu3ip2|U3-55k	RRP9, small subunit (SSU) processome component, homolog (yeast)	protein-coding
chr5	92042365	92043098	promoter-TSS (NM_001276315)	promoter-TSS (NM_001276315)	-35	NM_001276315	53886	Mm.44963	NM_016912	ENSMUSG00000029403	Cdkl2	5330436L21Rik|AI505225|KKIAMRE|Kkm	cyclin-dependent kinase-like 2 (CDC2-related kinase)	protein-coding
chr14	123626416	123627182	intron (NM_177393, intron 1 of 43)	CpG	345	NM_177393	338370	Mm.255348	NM_177393	ENSMUSG00000000197	Nalcn	A530023G15Rik|AI849508|Vgcnl1	sodium leak channel, non-selective	protein-coding
chr10	57485949	57486703	promoter-TSS (NR_045353)	promoter-TSS (NR_045353)	27	NR_045353	74928	Mm.416643	NR_045353	ENSMUSG00000097370	4930467K11Rik	-	RIKEN cDNA 4930467K11 gene	ncRNA
chr16	8829401	8831122	5' UTR (NM_001081400, exon 1 of 4)	5' UTR (NM_001081400, exon 1 of 4)	161	NM_001081400	69053	Mm.390868	NM_001081400	ENSMUSG00000022507	1810013L24Rik	1110017P05Rik|3010002C02Rik|AA792997|AW124177|Gm19906|R74903	RIKEN cDNA 1810013L24 gene	protein-coding
chr9	55511618	55512418	intron (NM_145615, intron 1 of 11)	CpG	225	NM_145615	110842	Mm.290853	NM_145615	ENSMUSG00000032314	Etfa	2010200I21Rik|D9Ertd394e	electron transferring flavoprotein, alpha polypeptide	protein-coding
chr3	141609598	141610575	intron (NM_001293561, intron 1 of 16)	L1Md_T|LINE|L1	144522	NM_001293561	22253	Mm.24430	NM_009472	ENSMUSG00000059921	Unc5c	B130051O18Rik|Unc5h3|rcm	unc-5 netrin receptor C	protein-coding
chr2	80812180	80816846	Intergenic	L1Md_A|LINE|L1	175249	NM_001190179	69482	Mm.29200	NM_027091	ENSMUSG00000026999	Nup35	2310006I24Rik|35kDa|5330402E05Rik|MP44|NO44	nucleoporin 35	protein-coding
chr4	62360231	62360970	promoter-TSS (NM_001045528)	promoter-TSS (NM_001045528)	-4	NM_001355385	338355	Mm.357792	NM_001045528	ENSMUSG00000066151	Fkbp15	BB131447|C430014M02Rik|FKBO133|FKBP-133|FKBP-15|FKBP133|mKIAA0674	FK506 binding protein 15	protein-coding
chr9	31211289	31212236	promoter-TSS (NM_009691)	promoter-TSS (NM_009691)	86	NM_001102456	11804	Mm.19133	NM_009691	ENSMUSG00000031996	Aplp2	AI790698|APLP-2|CDEBP	amyloid beta (A4) precursor-like protein 2	protein-coding
chr11	69094681	69095480	Intergenic	Intergenic	-3869	NM_011065	18626	Mm.7373	NM_011065	ENSMUSG00000020893	Per1	Hftm|Per|m-rigui|mPer1	period circadian clock 1	protein-coding
chr15	75748023	75748625	promoter-TSS (NM_194350)	promoter-TSS (NM_194350)	-3	NM_194350	378435		NM_194350	ENSMUSG00000047591	Mafa	RIPE3b1	v-maf musculoaponeurotic fibrosarcoma oncogene family, protein A (avian)	protein-coding
chr10	61680151	61680759	promoter-TSS (NR_126477)	promoter-TSS (NR_126477)	-165	NR_126477	75539		NR_126477		1700022H01Rik	-	RIKEN cDNA 1700022H01 gene	ncRNA
chr11	104468794	104469767	promoter-TSS (NM_001359634)	promoter-TSS (NM_001359634)	-419	NM_001359634	76719	Mm.136418	NM_001081045	ENSMUSG00000018412	Kansl1	1700081L11Rik|9430041J06Rik|mKIAA1267	KAT8 regulatory NSL complex subunit 1	protein-coding
chr7	105810798	105811412	promoter-TSS (NM_025301)	promoter-TSS (NM_025301)	-18	NM_025301	27397	Mm.44225	NM_025301	ENSMUSG00000030879	Mrpl17	MRP-L26|Rpml26	mitochondrial ribosomal protein L17	protein-coding
chr13	81782992	81783881	intron (NM_007684, intron 1 of 4)	CpG	189	NM_007684	12626	Mm.12481	NM_007684	ENSMUSG00000021537	Cetn3	MmCEN3	centrin 3	protein-coding
chr12	11265566	11266393	promoter-TSS (NM_001324476)	promoter-TSS (NM_001324476)	93	NM_025695	67241	Mm.173953	NM_025695	ENSMUSG00000020608	Smc6	2810489L22Rik|3830418C19Rik|AA990493|AU018782|AW742439|SMC-6|Smc6l1|mKIAA4103	structural maintenance of chromosomes 6	protein-coding
chr7	44590609	44590925	promoter-TSS (NM_008422)	promoter-TSS (NM_008422)	-119	NM_001290682	16504	Mm.40312	NM_008422	ENSMUSG00000062785	Kcnc3	KShIIID|Kcr2-3|Kv3.3	potassium voltage gated channel, Shaw-related subfamily, member 3	protein-coding
chr1	74284285	74285097	promoter-TSS (NM_146110)	promoter-TSS (NM_146110)	47	NM_146110	227290	Mm.379371	NM_146110	ENSMUSG00000006299	Aamp	AU040907|Aamp-rs	angio-associated migratory protein	protein-coding
chr13	107831235	107831498	intron (NM_145456, intron 5 of 17)	intron (NM_145456, intron 5 of 17)	58698	NM_145456	67263	Mm.490418	NM_145456		Zswim6	2900036G02Rik|mKIAA1577	zinc finger SWIM-type containing 6	protein-coding
chr2	25546607	25547108	promoter-TSS (NM_001290413)	promoter-TSS (NM_001290413)	83	NM_001290413	22030	Mm.3399	NM_009422	ENSMUSG00000026942	Traf2	AI325259	TNF receptor-associated factor 2	protein-coding
chr2	176830746	176830991	Intergenic	Intergenic	32268	NM_001205057	100039123	Mm.389409	NM_001205057	ENSMUSG00000078877	Gm14295	-	predicted gene 14295	protein-coding
chr4	13431147	13432474	Intergenic	L1Md_T|LINE|L1	-311492	NM_001111026	12395	Mm.4909	NM_009822	ENSMUSG00000006586	Runx1t1	Cbfa2t1h|ETO|MTG8	RUNX1 translocation partner 1	protein-coding
chr13	107858529	107859934	intron (NM_145456, intron 5 of 17)	intron (NM_145456, intron 5 of 17)	30833	NM_145456	67263	Mm.490418	NM_145456		Zswim6	2900036G02Rik|mKIAA1577	zinc finger SWIM-type containing 6	protein-coding
chr14	65343318	65344212	Intergenic	CpG	-14911	NM_199029	380912	Mm.270087	NM_199029	ENSMUSG00000034522	Zfp395	BC053701|Gm910	zinc finger protein 395	protein-coding
chr14	45388612	45389156	promoter-TSS (NM_019425)	promoter-TSS (NM_019425)	-88	NM_019425	54342	Mm.312945	NM_019425	ENSMUSG00000037722	Gnpnat1	AU017428|AU040593|EMeg32|Gpnat1|Gsnpat	glucosamine-phosphate N-acetyltransferase 1	protein-coding
chr12	40037203	40038289	promoter-TSS (NM_007487)	promoter-TSS (NM_007487)	241	NM_001039515	11861	Mm.12723	NM_007487	ENSMUSG00000047446	Arl4a	AI467555|Arl4	ADP-ribosylation factor-like 4A	protein-coding
chr4	145744660	145746224	Intergenic	CpG	-36101	NM_001083918	666532	Mm.392861	NM_001083918	ENSMUSG00000067916	Zfp991	Gm13139	zinc finger protein 991	protein-coding
chr11	20332254	20333243	promoter-TSS (NM_018861)	promoter-TSS (NM_018861)	-35	NM_018861	55963	Mm.6379	NM_018861	ENSMUSG00000020142	Slc1a4	ASCT-1|ASCT1|AW045657|SATT	solute carrier family 1 (glutamate/neutral amino acid transporter), member 4	protein-coding
chr3	90292675	90293616	Intergenic	Intergenic	22996	NR_105979	102465612		NR_105979	ENSMUSG00000099199	Mir7012	Gm27370|mmu-mir-7012	microRNA 7012	ncRNA
chr16	26866518	26867530	Intergenic	L1Md_T|LINE|L1	101221	NM_001285916	239789	Mm.326909	NM_001013761	ENSMUSG00000068428	Gmnc	Gemc1|Gm1778|Gm606	geminin coiled-coil domain containing	protein-coding
chr19	28010921	28012208	promoter-TSS (NM_011265)	promoter-TSS (NM_011265)	-398	NM_011265	19726	Mm.313321	NM_011265	ENSMUSG00000040929	Rfx3	C230093O12Rik|MRFX3	regulatory factor X, 3 (influences HLA class II expression)	protein-coding
chr17	32350291	32350903	promoter-TSS (NM_017476)	promoter-TSS (NM_017476)	-20	NM_017476	54194	Mm.281005	NM_017476	ENSMUSG00000002625	Akap8l	HAP95|Nakap95	A kinase (PRKA) anchor protein 8-like	protein-coding
chr16	4879969	4881002	promoter-TSS (NM_145359)	promoter-TSS (NM_145359)	-634	NM_145359	207740	Mm.268895	NM_145359	ENSMUSG00000039568	Ubald1	1500031H01Rik|BC013706|Fam100a	UBA-like domain containing 1	protein-coding
chr2	109917361	109917874	promoter-TSS (NM_172671)	promoter-TSS (NM_172671)	-30	NM_172671	107515	Mm.277351	NM_172671	ENSMUSG00000050199	Lgr4	9130225G07|A330106J01Rik|A930009A08Rik|Gpr48	leucine-rich repeat-containing G protein-coupled receptor 4	protein-coding
chr4	40948060	40948601	promoter-TSS (NM_029814)	promoter-TSS (NM_029814)	-36	NM_009736	12017	Mm.688	NM_009736	ENSMUSG00000028416	Bag1	BAG-1|Rap46	BCL2-associated athanogene 1	protein-coding
chr1	55052390	55053224	promoter-TSS (NM_026424)	promoter-TSS (NM_026424)	37	NM_026424	67876	Mm.281019	NM_026424	ENSMUSG00000025981	Coq10b	1500041J02Rik|1700030I21Rik|9530077A17Rik|AV002237|AW742641	coenzyme Q10B	protein-coding
chr10	121475829	121476765	promoter-TSS (NM_138956)	promoter-TSS (NM_138956)	-47	NM_138956	192678	Mm.41265	NM_138956	ENSMUSG00000025795	Rassf3	AW212023|AW322379	Ras association (RalGDS/AF-6) domain family member 3	protein-coding
chr2	33370602	33371598	intron (NM_175211, intron 1 of 19)	(CCCCG)n|Simple_repeat|Simple_repeat	394	NM_175211	241308	Mm.274249	NM_175211	ENSMUSG00000038831	Ralgps1	5830418G11Rik|AI853783|AI854138|RALGEF2|RALGPS1A|RalGEF 2|mKIAA0351	Ral GEF with PH domain and SH3 binding motif 1	protein-coding
chr13	3537570	3538674	promoter-TSS (NM_008112)	promoter-TSS (NM_008112)	47	NM_008112	14569	Mm.153226	NM_008112	ENSMUSG00000021218	Gdi2	GDI-B|GDIB|Gdi3	guanosine diphosphate (GDP) dissociation inhibitor 2	protein-coding
chr9	4376094	4376918	promoter-TSS (NM_145609)	promoter-TSS (NM_145609)	-46	NM_145609	78100	Mm.206549	NM_145609	ENSMUSG00000041124	Msantd4	8430410K20Rik|Mysantd4	Myb/SANT-like DNA-binding domain containing 4 with coiled-coils	protein-coding
chr10	81137044	81137900	intron (NM_010731, intron 1 of 2)	CpG	1201	NM_010731	16969	Mm.20920	NM_010731	ENSMUSG00000035011	Zbtb7a	9030619K07Rik|9130006G12Rik|AI452336|FBI-1|Lrf|Pokemon|Zbtb7	zinc finger and BTB domain containing 7a	protein-coding
chr9	70678630	70679704	5' UTR (NM_007399, exon 1 of 16)	5' UTR (NM_007399, exon 1 of 16)	185	NM_007399	11487	Mm.3037	NM_007399	ENSMUSG00000054693	Adam10	1700031C13Rik|MADM|kuz|kuzbanian	a disintegrin and metallopeptidase domain 10	protein-coding
chr17	57047312	57047868	intron (NM_025877, intron 8 of 9)	ZP3AR|Satellite|Satellite	-5936	NM_175333	103775	Mm.33647	NM_175333	ENSMUSG00000011486	Slc25a41	4933406J04Rik|AI507137	solute carrier family 25, member 41	protein-coding
chr8	70506110	70506866	promoter-TSS (NR_151646)	promoter-TSS (NR_151646)	-62	NR_151646	66462	Mm.28242	NM_025577	ENSMUSG00000058833	Rex1bd	2810428I15Rik	required for excision 1-B domain containing	protein-coding
chr19	47730836	47731815	promoter-TSS (NM_026377)	promoter-TSS (NM_026377)	-431	NM_026377	67788	Mm.181610	NM_026377	ENSMUSG00000025066	Sfr1	6330577E15Rik|Meir5	SWI5 dependent recombination repair 1	protein-coding
chr5	88546025	88546981	Intergenic	L1Md_T|LINE|L1	-7959	NM_023054	65961	Mm.490364	NM_023054	ENSMUSG00000070697	Utp3	2400011K09Rik|AW557551|C87704|Crl-1|Crl1|Crlz1|Sas10	UTP3 small subunit processome component	protein-coding
chr12	55079876	55080745	promoter-TSS (NM_011899)	promoter-TSS (NM_011899)	-186	NM_011899	24067	Mm.471968	NM_011899	ENSMUSG00000073079	Srp54a	54kDa|Srp54	signal recognition particle 54A	protein-coding
chr13	4982056	4983768	Intergenic	L1Md_T|LINE|L1	-373748	NM_018859	56043	Mm.251908	NM_018859	ENSMUSG00000045410	Akr1e1	1810061I10Rik|Akr1e2	aldo-keto reductase family 1, member E1	protein-coding
chr19	61266647	61267153	Intergenic	CpG	-38482	NM_009970	12982	Mm.287228	NM_009970	ENSMUSG00000059326	Csf2ra	CD116|Csfgmra|GM-CSF-Ra|GM-CSFR	colony stimulating factor 2 receptor, alpha, low-affinity (granulocyte-macrophage)	protein-coding
chr16	17233138	17234090	promoter-TSS (NM_178922)	promoter-TSS (NM_178922)	27	NM_178922	58180	Mm.261602	NM_178922	ENSMUSG00000050240	Hic2	AA409108|HRG22|mKIAA1020	hypermethylated in cancer 2	protein-coding
chr4	40853586	40854544	5' UTR (NM_022305, exon 1 of 6)	5' UTR (NM_022305, exon 1 of 6)	472	NM_022305	14595	Mm.15622	NM_022305	ENSMUSG00000028413	B4galt1	B-1,4-GalT|B-1,4-GalT1|GalT|Ggtb|Ggtb2|b4Gal-T1|beta-1,4-GalT|beta-1,4-GalT1|beta4Gal-T1	UDP-Gal:betaGlcNAc beta 1,4- galactosyltransferase, polypeptide 1	protein-coding
chr13	5860951	5861598	promoter-TSS (NM_011803)	promoter-TSS (NM_011803)	-215	NM_011803	23849	Mm.275036	NM_011803	ENSMUSG00000000078	Klf6	AI448727|BCD1|C86813|CPBP|Copeb|FM2|FM6|Ierepo1|Ierepo3|R75280|Zf9	Kruppel-like factor 6	protein-coding
chr10	81378408	81378892	promoter-TSS (NM_019757)	promoter-TSS (NM_019757)	-280	NM_019757	56371	Mm.24202	NM_019757	ENSMUSG00000020235	Fzr1	AW108046|Cdh1|FZR|FZR2|Fyr|HCDH|HCDH1	fizzy and cell division cycle 20 related 1	protein-coding
chr5	111633340	111633798	Intergenic	MTEb|LTR|ERVL-MaLR	52008	NR_015546	330164	Mm.193276	NM_177875	ENSMUSG00000052848	C130026L21Rik	-	RIKEN cDNA C130026L21 gene	ncRNA
chr13	65950362	65950706	Intergenic	Intergenic	-162919	NM_001177832	628709	Mm.390595	NM_001177832	ENSMUSG00000095909	Gm10324	-	predicted gene 10324	protein-coding
chr10	80115270	80115866	promoter-TSS (NM_001301853)	promoter-TSS (NM_001301853)	-227	NM_001301853	20869	Mm.44231	NM_011492	ENSMUSG00000003068	Stk11	AA408040|Lkb1|Par-4|R75140	serine/threonine kinase 11	protein-coding
chr7	27447452	27448142	promoter-TSS (NM_144923)	promoter-TSS (NM_144923)	-181	NM_144923	233016	Mm.24021	NM_144923	ENSMUSG00000040466	Blvrb	-	biliverdin reductase B (flavin reductase (NADPH))	protein-coding
chr5	90223631	90224157	non-coding (NR_028088, exon 1 of 6)	non-coding (NR_028088, exon 1 of 6)	102	NR_028088	231430	Mm.319697	NM_001033310	ENSMUSG00000035505	Cox18	BC038311	cytochrome c oxidase assembly protein 18	protein-coding
chr9	93019373	93021174	Intergenic	L1Md_T|LINE|L1	-14540	NR_040756	78349	Mm.52612	NR_040756	ENSMUSG00000100294	1700034K08Rik	-	RIKEN cDNA 1700034K08 gene	ncRNA
chr2	37108178	37109034	Intergenic	L1Md_Gf|LINE|L1	-2958	NM_147051	259053	Mm.377810	NM_147051	ENSMUSG00000075377	Olfr362	MOR158-1	olfactory receptor 362	protein-coding
chr17	33817096	33818173	exon (NM_030697, exon 3 of 11)	exon (NM_030697, exon 3 of 11)	6928	NM_001355384	54127	Mm.352374	NM_016844	ENSMUSG00000067288	Rps28	-	ribosomal protein S28	protein-coding
chr13	84347910	84348512	Intergenic	Intergenic	125915	NM_001361909	72745	Mm.295063	NM_175187	ENSMUSG00000035762	Tmem161b	2810446P07Rik|AI843389	transmembrane protein 161B	protein-coding
chr3	32708320	32709004	5' UTR (NM_019673, exon 1 of 14)	5' UTR (NM_019673, exon 1 of 14)	116	NM_019673	56456	Mm.41077	NM_019673	ENSMUSG00000027671	Actl6a	2810432C06Rik|AI851094|ARP4|Actl6|Baf53a|C79802	actin-like 6A	protein-coding
chr4	146263154	146264130	Intergenic	Intergenic	-6743	NM_001083918	666532	Mm.392861	NM_001083918	ENSMUSG00000067916	Zfp991	Gm13139	zinc finger protein 991	protein-coding
chr7	29518328	29519226	Intergenic	CpG	-13317	NM_001081028	74206	Mm.447042	NM_001081028	ENSMUSG00000030583	Sipa1l3	2610511M17Rik	signal-induced proliferation-associated 1 like 3	protein-coding
chr4	148038492	148039253	promoter-TSS (NM_010840)	promoter-TSS (NM_010840)	-59	NM_011929	26372	Mm.89987	NM_011929	ENSMUSG00000029016	Clcn6	AI850629|Clc6	chloride channel, voltage-sensitive 6	protein-coding
chr2	37452033	37452989	intron (NM_001362958, intron 1 of 25)	CpG	257	NM_001033960	227800	Mm.383192	NM_146121	ENSMUSG00000035437	Rabgap1	Gapcena|mKIAA4104	RAB GTPase activating protein 1	protein-coding
chr3	89393638	89394250	promoter-TSS (NM_009565)	promoter-TSS (NM_009565)	-346	NR_040404	545539	Mm.393389	NR_040403	ENSMUSG00000074466	Gm15417	-	predicted gene 15417	ncRNA
chr9	21615743	21616619	promoter-TSS (NM_011417)	promoter-TSS (NM_011417)	12	NM_001357764	20586	Mm.286593	NM_011417	ENSMUSG00000032187	Smarca4	BAF190A|Brg1|HP1-BP72|SNF2beta|SW1/SNF|b2b508.1Clo|b2b692Clo	SWI/SNF related, matrix associated, actin dependent regulator of chromatin, subfamily a, member 4	protein-coding
chr10	127063176	127063792	promoter-TSS (NM_009870)	promoter-TSS (NM_009870)	-51	NM_001355005	12567	Mm.6839	NM_009870	ENSMUSG00000006728	Cdk4	Crk3	cyclin-dependent kinase 4	protein-coding
chr3	88296649	88297360	promoter-TSS (NM_009836)	promoter-TSS (NM_009836)	-5	NM_001357024	76927	Mm.273330	NM_029801	ENSMUSG00000010538	Tsacc	1700021C14Rik|SIP	TSSK6 activating co-chaperone	protein-coding
chr12	81780961	81781597	promoter-TSS (NM_001174107)	promoter-TSS (NM_001174107)	-109	NM_001174107	338372	Mm.35284	NM_177395	ENSMUSG00000042724	Map3k9	E130314H24Rik|Mlk1|Prke1	mitogen-activated protein kinase kinase kinase 9	protein-coding
chr1	88277212	88277811	promoter-TSS (NM_172505)	promoter-TSS (NM_172505)	46	NM_172505	212427	Mm.384762	NM_172505		A730008H23Rik	Fleg1	RIKEN cDNA A730008H23 gene	protein-coding
chr12	35854385	35855735	Intergenic	L1Md_Gf|LINE|L1	-70561	NM_207531	403205	Mm.190508	NM_207531	ENSMUSG00000036231	Agr3	BCMP11|E030025L21Rik|Gm888	anterior gradient 3	protein-coding
chr17	36231253	36231590	Intergenic	CpG	26425	NM_026308	67676	Mm.27131	NM_026308	ENSMUSG00000024446	Rpp21	0610037N01Rik	ribonuclease P 21 subunit	protein-coding
chr13	35905875	35906439	intron (NM_145938, intron 1 of 7)	CpG	190	NM_145938	208366	Mm.35545	NM_145938	ENSMUSG00000021418	Rpp40	D8Bwg1265e|Rnasep1	ribonuclease P 40 subunit	protein-coding
chr14	62837198	62838175	promoter-TSS (NR_106174)	promoter-TSS (NR_106174)	-4	NM_175546	268752	Mm.1960	NM_175546	ENSMUSG00000014547	Wdfy2	5830485M08|B130024L21Rik|ProF|ZFYVE22	WD repeat and FYVE domain containing 2	protein-coding
chr11	89081714	89082018	intron (NM_001033266, intron 2 of 3)	(CTGTG)n|Simple_repeat|Simple_repeat	8025	NM_001033266	217071	Mm.342127	NM_001033266	ENSMUSG00000072553	Gm525	-	predicted gene 525	protein-coding
chr17	34603555	34604499	promoter-TSS (NM_019403)	promoter-TSS (NM_019403)	-466	NM_019403	54197	Mm.274542	NM_019403	ENSMUSG00000015478	Rnf5	2410131O05Rik|AA407576|NG2	ring finger protein 5	protein-coding
chr7	27232779	27233281	promoter-TSS (NM_133770)	promoter-TSS (NM_133770)	17	NM_133770	76889	Mm.124728	NM_133770	ENSMUSG00000003762	Coq8b	0610012P18Rik|Adck4	coenzyme Q8B	protein-coding
chr14	52103970	52104507	promoter-TSS (NM_001360172)	promoter-TSS (NM_001360172)	-217	NM_016884	15381	Mm.427321	NM_016884	ENSMUSG00000060373	Hnrnpc	AL022939|D14Wsu171e|Hnrpc|Hnrpc1|Hnrpc2|hnRNPC1|hnRNPC2|hnrnp-C	heterogeneous nuclear ribonucleoprotein C	protein-coding
chr11	50292265	50292775	promoter-TSS (NM_175334)	promoter-TSS (NM_175334)	-184	NM_175334	103806	Mm.51116	NM_175334	ENSMUSG00000050567	Maml1	AI644666|AW743257|D930008C07Rik|Mam-1|Mam1|mKIAA0200	mastermind like transcriptional coactivator 1	protein-coding
chr19	53943923	53945704	promoter-TSS (NM_001195348)	promoter-TSS (NM_001195348)	-63	NM_001355242	56392	Mm.228669	NM_019658	ENSMUSG00000024976	Shoc2	AU017287|Sur8|mKIAA0862	Shoc2, leucine rich repeat scaffold protein	protein-coding
chr7	127588173	127588877	promoter-TSS (NM_001360883)	promoter-TSS (NM_001360883)	70	NM_001033040	233899	Mm.25220	NM_001033040	ENSMUSG00000057176	Ccdc189	Gm166	coiled-coil domain containing 189	protein-coding
chr16	48993704	48994372	promoter-TSS (NM_027341)	promoter-TSS (NM_027341)	74	NM_027341	224170	Mm.275138	NM_027341	ENSMUSG00000064061	Dzip3	2310047C04Rik|2A-HUB|6430549P11Rik|A230104G20	DAZ interacting protein 3, zinc finger	protein-coding
chr17	35990396	35990780	Intergenic	CT-rich|Low_complexity|Low_complexity	-3916	NR_015618	77810	Mm.483143	NR_015618		A930015D03Rik	-	RIKEN cDNA A930015D03 gene	ncRNA
chr5	121836448	121837444	promoter-TSS (NM_001306128)	promoter-TSS (NM_001306128)	-87	NM_001306127	16923	Mm.65493	NM_008507	ENSMUSG00000042594	Sh2b3	AI429800|Lnk	SH2B adaptor protein 3	protein-coding
chr10	81037063	81037536	promoter-TSS (NM_134135)	promoter-TSS (NM_134135)	16	NM_001358898	106947	Mm.5353	NM_134135	ENSMUSG00000046822	Slc39a3	AI845814|ZIP-3|Zip3	solute carrier family 39 (zinc transporter), member 3	protein-coding
chr1	191396738	191397740	promoter-TSS (NM_144880)	promoter-TSS (NM_144880)	-198	NM_144880	226849	Mm.205569	NM_144880	ENSMUSG00000026626	Ppp2r5a	PR61alpha	protein phosphatase 2, regulatory subunit B', alpha	protein-coding
chr19	40513239	40514054	promoter-TSS (NM_178362)	promoter-TSS (NM_178362)	90	NM_178362	20411	Mm.210815	NM_009166	ENSMUSG00000025006	Sorbs1	2310065E01Rik|9530001P15Rik|CAP|SH3P12|Sh3d5|mKIAA1296	sorbin and SH3 domain containing 1	protein-coding
chrX	149772698	149773149	Intergenic	Intergenic	-11556	NM_001114400	434866	Mm.491025	NM_001114400	ENSMUSG00000096834	Gm15127	-	predicted gene 15127	protein-coding
chr11	61494045	61494819	promoter-TSS (NM_001291037)	promoter-TSS (NM_001291037)	-166	NM_001291036	23939	Mm.38172	NM_011841	ENSMUSG00000001034	Mapk7	BMK-1|BMK1|ERK-5|ERK5|Erk5-T|PRKM7|b2b2346Clo	mitogen-activated protein kinase 7	protein-coding
chr12	110888798	110889944	promoter-TSS (NM_027223)	promoter-TSS (NM_027223)	107	NM_001289510	104859	Mm.35583	NM_175336	ENSMUSG00000021275	Tecpr2	4930573I19Rik|AI604920|mKIAA0297	tectonin beta-propeller repeat containing 2	protein-coding
chr4	150087129	150087709	promoter-TSS (NM_177366)	promoter-TSS (NM_177366)	-84	NM_177366	269604	Mm.219307	NM_177366	ENSMUSG00000047875	Gpr157	F730108M23Rik	G protein-coupled receptor 157	protein-coding
chr6	18585669	18587325	Intergenic	L1Md_T|LINE|L1	-71628	NM_080285	30785	Mm.224189	NM_080285	ENSMUSG00000000416	Cttnbp2	3010022N24Rik|4732477G22Rik|6430526E05|9130022E09Rik|AU040881|Cortbp2|ORF4|mKIAA1758	cortactin binding protein 2	protein-coding
chr1	71102715	71103262	promoter-TSS (NM_007525)	promoter-TSS (NM_007525)	-16	NM_007525	12021	Mm.10764	NM_007525	ENSMUSG00000026196	Bard1	-	BRCA1 associated RING domain 1	protein-coding
chr16	20692941	20693901	TTS (NM_145941)	TTS (NM_145941)	-1636	NM_133778	78408	Mm.196512	NM_133778	ENSMUSG00000050821	Fam131a	2900046G09Rik	family with sequence similarity 131, member A	protein-coding
chr11	96075562	96076090	promoter-TSS (NM_007506)	promoter-TSS (NM_007506)	-132	NM_007506	11951	Mm.258	NM_007506	ENSMUSG00000006057	Atp5g1	Atp5mc1	ATP synthase, H+ transporting, mitochondrial F0 complex, subunit C1 (subunit 9)	protein-coding
chr1	130599969	130601214	intron (NM_009581, intron 4 of 11)	L1Md_T|LINE|L1	29015	NM_009581	22789	Mm.4644	NM_009581	ENSMUSG00000042554	Zp3r	AV264399|SP56	zona pellucida 3 receptor	protein-coding
chr13	64152303	64154125	promoter-TSS (NM_175494)	promoter-TSS (NM_175494)	-15	NM_175494	238673	Mm.300065	NM_175494	ENSMUSG00000044934	Zfp367	8030486J21Rik|ZFF29a|ZFF29b|Znf367	zinc finger protein 367	protein-coding
chr12	116404990	116405716	promoter-TSS (NR_028421)	promoter-TSS (NR_028421)	-83	NM_133762	76044	Mm.491196	NM_133762	ENSMUSG00000042029	Ncapg2	5830426I05Rik|CAP-G2|Luzp5|Mtb|mCAP-G2	non-SMC condensin II complex, subunit G2	protein-coding
chr9	58582031	58582571	promoter-TSS (NM_001293673)	promoter-TSS (NM_001293673)	61	NM_001357751	20320	Mm.15125	NM_009145	ENSMUSG00000032336	Nptn	AW554172|SDR-1|Sdfr1	neuroplastin	protein-coding
chr4	43058717	43059334	promoter-TSS (NM_001310758)	promoter-TSS (NM_001310758)	72	NM_001081413	22249	Mm.128892	NM_021468	ENSMUSG00000028456	Unc13b	Munc13-1|Munc13-2|Unc13a|Unc13h1|Unc13h2	unc-13 homolog B	protein-coding
chr6	47777662	47778536	Intergenic	Intergenic	-25174	NR_002841	19799		NR_002841		Rn4.5s	-	4.5S RNA	rRNA
chr10	27818833	27825263	Intergenic	L1Md_A|LINE|L1	-205106	NM_008481	16773	Mm.256087	NM_008481	ENSMUSG00000019899	Lama2	5830440B04|dy|mKIAA4087|mer|merosin	laminin, alpha 2	protein-coding
chr8	68847943	68848328	Intergenic	Intergenic	-32420	NM_008509	16956	Mm.1514	NM_008509	ENSMUSG00000015568	Lpl	-	lipoprotein lipase	protein-coding
chr7	118129320	118129934	promoter-TSS (NM_019419)	promoter-TSS (NM_019419)	-2	NM_019419	54208	Mm.29924	NM_019419	ENSMUSG00000030654	Arl6ip1	AIP-6|AL022945|ARMER|AU042858|Aip-1|Arl6ip|C85138|mKIAA0069	ADP-ribosylation factor-like 6 interacting protein 1	protein-coding
chr7	17055948	17056668	exon (NM_016868, exon 2 of 15)	exon (NM_016868, exon 2 of 15)	371	NM_016868	53417	Mm.135110	NM_016868	ENSMUSG00000004328	Hif3a	Ipas|MOP7|NEPAS|bHLHe17	hypoxia inducible factor 3, alpha subunit	protein-coding
chr11	100527731	100528509	promoter-TSS (NM_001199296)	promoter-TSS (NM_001199296)	-120	NM_001199296	104112	Mm.282039	NM_134037	ENSMUSG00000020917	Acly	A730098H14Rik|AW538652	ATP citrate lyase	protein-coding
chr8	122611262	122611657	promoter-TSS (NM_021502)	promoter-TSS (NM_021502)	28	NM_001193645	50917	Mm.1786	NM_016722	ENSMUSG00000015027	Galns	mFLJ00319	galactosamine (N-acetyl)-6-sulfate sulfatase	protein-coding
chr18	15981102	15982343	Intergenic	L1Md_T|LINE|L1	-221565	NM_001364992	71367	Mm.329304	NM_199055	ENSMUSG00000047161	Chst9	5430438D01Rik|GalNAc4ST-2|galNAc-4-ST2	carbohydrate (N-acetylgalactosamine 4-0) sulfotransferase 9	protein-coding
chr17	6948072	6948836	promoter-TSS (NM_001083945)	promoter-TSS (NM_001083945)	-98	NM_001083945	100037282	Mm.29830	NM_001083945	ENSMUSG00000023806	Rsph3b	Rshl2b	radial spoke 3B homolog (Chlamydomonas)	protein-coding
chr2	84677890	84678716	promoter-TSS (NM_001290751)	promoter-TSS (NM_001290751)	-99	NM_025885	381379	Mm.219643	NM_025885	ENSMUSG00000027080	Med19	2410018M14Rik|3110040A13Rik|LCMR1	mediator complex subunit 19	protein-coding
chr19	53806714	53807111	intron (NM_001170847, intron 1 of 13)	intron (NM_001170847, intron 1 of 13)	-85319	NM_011050	18569	Mm.1605	NM_011050	ENSMUSG00000024975	Pdcd4	D19Ucla1|Ma3|Tis	programmed cell death 4	protein-coding
chr13	64507265	64507508	Intergenic	GA-rich|Low_complexity|Low_complexity	-9594	NM_001195435	68880	Mm.390594	NM_001195435	ENSMUSG00000096537	Fam240b	1190003K10Rik	family with sequence similarity 240 member B	protein-coding
chr16	13818541	13819628	promoter-TSS (NM_001346110)	promoter-TSS (NM_001346110)	-167	NM_001346109	18203	Mm.380410	NM_010946	ENSMUSG00000022681	Ntan1	PNAA|PNAD	N-terminal Asn amidase	protein-coding
chr17	24849791	24850819	promoter-TSS (NM_001159626)	promoter-TSS (NM_001159626)	-3	NM_023480	68636	Mm.347964	NM_023480	ENSMUSG00000045316	Fahd1	1110025H10Rik|AV002085	fumarylacetoacetate hydrolase domain containing 1	protein-coding
chr2	177172935	177173227	Intergenic	Intergenic	172125	NM_001362250	628147	Mm.374080	NM_001362250		Gm2004	100039000	predicted gene 2004	protein-coding
chr17	57247352	57248010	promoter-TSS (NM_001308072)	promoter-TSS (NM_001308072)	8	NM_001308072	78308	Mm.28468	NM_030084	ENSMUSG00000005823	Gpr108	1810015L19Rik|AA589464|C79132|Lustr2	G protein-coupled receptor 108	protein-coding
chr7	126884512	126885043	5' UTR (NM_001163775, exon 1 of 16)	5' UTR (NM_001163775, exon 1 of 16)	190	NM_001163774	381921	Mm.259634	NM_001163774	ENSMUSG00000059981	Taok2	1110033K02Rik|B230344N16|MAP3K17|PSK|PSK1|TAO1|TAO2|mKIAA0881	TAO kinase 2	protein-coding
chr4	155601328	155602135	5' UTR (NM_177186, exon 1 of 9)	5' UTR (NM_177186, exon 1 of 9)	315	NM_177186	320541	Mm.306018	NM_177186	ENSMUSG00000042202	Slc35e2	A530082C11Rik|AI957035|Slc35e2a	solute carrier family 35, member E2	protein-coding
chr10	79766665	79767817	promoter-TSS (NR_027505)	promoter-TSS (NR_027505)	-289	NR_027505	70294	Mm.466670	NM_144528	ENSMUSG00000035890	Rnf126	2610010O19Rik	ring finger protein 126	protein-coding
chr6	32093648	32094669	Intergenic	L1Md_T|LINE|L1	43870	NM_029587	76382	Mm.23510	NM_029587	ENSMUSG00000029766	1700012A03Rik	AI429084	RIKEN cDNA 1700012A03 gene	protein-coding
chr5	8996882	8997520	promoter-TSS (NM_023733)	promoter-TSS (NM_023733)	-55	NM_023733	74114	Mm.28197	NM_023733	ENSMUSG00000003623	Crot	1200003H03Rik	carnitine O-octanoyltransferase	protein-coding
chr19	53390104	53390950	promoter-TSS (NM_001356986)	promoter-TSS (NM_001356986)	107	NM_172429	76479	Mm.313687	NM_172429	ENSMUSG00000025024	Smndc1	-	survival motor neuron domain containing 1	protein-coding
chr12	108554338	108555378	5' UTR (NM_001163394, exon 1 of 14)	5' UTR (NM_001163394, exon 1 of 14)	138	NM_007965	14026	Mm.238841	NM_007965	ENSMUSG00000021262	Evl	AI528774|b2b2600Clo	Ena-vasodilator stimulated phosphoprotein	protein-coding
chr18	33213544	33214136	promoter-TSS (NM_001347624)	promoter-TSS (NM_001347624)	22	NM_001347624	170459	Mm.127058	NM_133774	ENSMUSG00000024378	Stard4	4632419C16Rik|9030213J02Rik	StAR-related lipid transfer (START) domain containing 4	protein-coding
chr6	128760230	128761087	Intergenic	Intergenic	27983	NM_008527	17059	Mm.480764	NM_008527	ENSMUSG00000030325	Klrb1c	AI462337|CD161|Klrb1b|Ly-59|Ly55c|Ly59|NK-RP1|NK1.1|NKR-P1.9|NKRP1|NKRP140|Nk-1|Nk-1.2|Nk1|Nk1.2|Nkrp1b|Nkrp1c|ly-55c	killer cell lectin-like receptor subfamily B member 1C	protein-coding
chr12	24830894	24831945	promoter-TSS (NM_001083341)	promoter-TSS (NM_001083341)	-180	NM_001083341	67216	Mm.167671	NM_026037	ENSMUSG00000020646	Mboat2	2810049G06Rik|AU022889|AW547221|LPCAT4|Moact2|Oact2	membrane bound O-acyltransferase domain containing 2	protein-coding
chr13	112660427	112661058	promoter-TSS (NM_178746)	promoter-TSS (NM_178746)	-24	NM_178746	268706	Mm.40834	NM_175376	ENSMUSG00000047789	Slc38a9	4833412L08Rik|6720411P22Rik|9130023D20Rik|9430067K09Rik|A730092C09	solute carrier family 38, member 9	protein-coding
chr5	17468679	17469111	Intergenic	Lx2A1|LINE|L1	-7227	NM_027609	70935	Mm.332225	NM_027609	ENSMUSG00000058643	Speer4f1	4922502J04Rik|SPEER-4F|Speer4f	spermatogenesis associated glutamate (E)-rich protein 4F1	protein-coding
chr9	93917213	93918085	Intergenic	L1Md_T|LINE|L1	620432	NM_001033145	68861	Mm.258746	NM_001033145	ENSMUSG00000045414	Dipk2a	1190002N15Rik|GoPro49|HASF	divergent protein kinase domain 2A	protein-coding
chr18	3507396	3508402	promoter-TSS (NM_026505)	promoter-TSS (NM_026505)	-58	NM_026505	68010	Mm.284863	NM_026505	ENSMUSG00000024232	Bambi	2610003H06Rik	BMP and activin membrane-bound inhibitor	protein-coding
chr7	57590539	57592289	intron (NM_008071, intron 1 of 8)	CpG	241	NM_008071	14402	Mm.8004	NM_008071	ENSMUSG00000033676	Gabrb3	A230092K12Rik|AW049585|Cp1|Gabrb-3|beta3	gamma-aminobutyric acid (GABA) A receptor, subunit beta 3	protein-coding
chr17	14992139	14993927	intron (NM_198104, intron 1 of 3)	CpG	14169	NM_001123370	100041574	Mm.393767	NM_001123370	ENSMUSG00000116953	9030025P20Rik	D17Zt9e	RIKEN cDNA 9030025P20 gene	protein-coding
chrX	75673757	75674594	Intergenic	Intergenic	90524	NR_029443	74396	Mm.162493	NR_029443	ENSMUSG00000087396	4933407K13Rik	A130080L05Rik|Dxz4	RIKEN cDNA 4933407K13 gene	ncRNA
chr10	79780000	79780919	intron (NM_031380, intron 3 of 4)	intron (NM_031380, intron 3 of 4)	3185	NM_031380	83554	Mm.251710	NM_031380	ENSMUSG00000020325	Fstl3	E030038F23Rik|Flrg	follistatin-like 3	protein-coding
chr3	145923988	145924600	promoter-TSS (NM_009740)	promoter-TSS (NM_009740)	32	NM_009740	12042	Mm.239141	NM_009740	ENSMUSG00000028191	Bcl10	AI132454|BCL-10|C81403|CARMEN|CIPER|CLAP|ME10|cE10	B cell leukemia/lymphoma 10	protein-coding
chr12	43036732	43037863	Intergenic	L1Md_T|LINE|L1	-3080	NR_148724	102636207		NR_148724		Gm33340	Gm40882	predicted gene, 33340	ncRNA
chr11	84869506	84871260	promoter-TSS (NR_131197)	promoter-TSS (NR_131197)	378	NR_131201	102635561	Mm.341797	NR_131197		Ggnbp2os	-	gametogenetin binding protein 2, opposite strand	ncRNA
chr17	34118699	34122891	promoter-TSS (NR_037970)	promoter-TSS (NR_037970)	-895	NR_037970	14312	Mm.3444	NM_010238	ENSMUSG00000024335	Brd2	AW228947|D17H6S113E|Frg-1|Fsrg-1|Fsrg1|Nat|Ring3|Rnf3|mKIAA4005	bromodomain containing 2	protein-coding
chr3	45578304	45579468	Intergenic	L1Md_T|LINE|L1	-139577	NR_040594	72274	Mm.396202	NR_040594	ENSMUSG00000100799	1700027H10Rik	-	RIKEN cDNA 1700027H10 gene	ncRNA
chr6	73344460	73345807	Intergenic	L1Md_T|LINE|L1	96628	NM_019879	56451	Mm.29845	NM_019879	ENSMUSG00000052738	Suclg1	1500000I01Rik|Sucla1	succinate-CoA ligase, GDP-forming, alpha subunit	protein-coding
chr4	98922965	98923781	promoter-TSS (NM_001301414)	promoter-TSS (NM_001301414)	-437	NM_001356424	230484	Mm.371692	NM_146144	ENSMUSG00000028560	Usp1	-	ubiquitin specific peptidase 1	protein-coding
chr9	106438038	106438754	promoter-TSS (NM_001276442)	promoter-TSS (NM_001276442)	-160	NM_025371	109652	Mm.7165	NM_025371	ENSMUSG00000023262	Acy1	1110014J22Rik|Acy-1	aminoacylase 1	protein-coding
chr9	26999204	26999974	promoter-TSS (NM_025862)	promoter-TSS (NM_025862)	-40	NM_025862	66948	Mm.289244	NM_025862	ENSMUSG00000031969	Acad8	2310016C19Rik|AI786953	acyl-Coenzyme A dehydrogenase family, member 8	protein-coding
chr13	32801813	32802433	promoter-TSS (NM_030215)	promoter-TSS (NM_030215)	93	NM_030215	78903	Mm.286680	NM_030215	ENSMUSG00000021400	Wrnip1	4833444L21Rik|WHIP|Wrnip	Werner helicase interacting protein 1	protein-coding
chr12	71015133	71017048	promoter-TSS (NR_045056)	promoter-TSS (NR_045056)	123	NM_001081195	238247	Mm.241601	NM_001081195	ENSMUSG00000048118	Arid4a	A630009N03|A630067N03Rik|Rbbp1	AT rich interactive domain 4A (RBP1-like)	protein-coding
chr6	92091819	92092540	promoter-TSS (NM_001347342)	promoter-TSS (NM_001347342)	-254	NM_001347342	22026	Mm.87062	NM_011630	ENSMUSG00000005893	Nr2c2	TAK1|Tr4|mKIAA4145	nuclear receptor subfamily 2, group C, member 2	protein-coding
chr12	108792336	108793243	promoter-TSS (NM_009537)	promoter-TSS (NM_009537)	-508	NM_009537	22632	Mm.3868	NM_009537	ENSMUSG00000021264	Yy1	NF-E1|YY-1	YY1 transcription factor	protein-coding
chr19	61313464	61313845	Intergenic	Intergenic	-85236	NM_009970	12982	Mm.287228	NM_009970	ENSMUSG00000059326	Csf2ra	CD116|Csfgmra|GM-CSF-Ra|GM-CSFR	colony stimulating factor 2 receptor, alpha, low-affinity (granulocyte-macrophage)	protein-coding
chr5	33657565	33658525	promoter-TSS (NM_001356983)	promoter-TSS (NM_001356983)	-68	NM_001356983	68366	Mm.491151	NM_026698	ENSMUSG00000019295	Tmem129	0610039G24Rik|2410015J15Rik|AA409575	transmembrane protein 129	protein-coding
chr2	178406908	178407828	intron (NM_177191, intron 1 of 43)	CpG	290	NM_177191	320558	Mm.70781	NM_177191	ENSMUSG00000060445	Sycp2	3830402K23Rik|4930518F03Rik	synaptonemal complex protein 2	protein-coding
chr13	66802260	66802630	Intergenic	Intergenic	102905	NM_026219	67530	Mm.379136	NM_026219	ENSMUSG00000021520	Uqcrb	2210415M14Rik|QP-C|QPC|UQBC|UQBP|UQPC	ubiquinol-cytochrome c reductase binding protein	protein-coding
chr7	16264327	16264587	Intergenic	ZP3AR|Satellite|Satellite	-4917	NM_007577	12273	Mm.247623	NM_007577	ENSMUSG00000049130	C5ar1	C5aR|C5r1|Cd88|D7Msu1	complement component 5a receptor 1	protein-coding
chr16	18348033	18348731	promoter-TSS (NM_001359110)	promoter-TSS (NM_001359110)	200	NM_033474	11877	Mm.293599	NM_033474	ENSMUSG00000000325	Arvcf	-	armadillo repeat gene deleted in velocardiofacial syndrome	protein-coding
chr2	79634903	79635952	promoter-TSS (NM_080558)	promoter-TSS (NM_080558)	2	NM_080558	70599	Mm.272881	NM_080558	ENSMUSG00000027007	Itprid2	5730488C15Rik|CS-1|CS1|KRAP|SPAG13|Ssfa2|mKIAA1927	ITPR interacting domain containing 2	protein-coding
chr14	57525414	57525972	intron (NM_145837, intron 2 of 2)	(CGGGG)n|Simple_repeat|Simple_repeat	864	NM_145837	239114	Mm.390726	NM_145837	ENSMUSG00000050222	Il17d	AI462269|IL-17D	interleukin 17D	protein-coding
chr9	21723477	21724595	intron (NM_001252659, intron 1 of 17)	intron (NM_001252659, intron 1 of 17)	460	NM_001252659	16835	Mm.3213	NM_010700	ENSMUSG00000032193	Ldlr	Hlb301	low density lipoprotein receptor	protein-coding
chr13	23683635	23684570	promoter-TSS (NM_178189)	promoter-TSS (NM_178189)	-97	NM_001290380	68024	Mm.261676	NM_023422	ENSMUSG00000018102	Hist1h2bc	2610022J01Rik|H2bfs|R74621	histone cluster 1, H2bc	protein-coding
chr2	35336599	35337349	promoter-TSS (NM_013515)	promoter-TSS (NM_013515)	35	NM_013515	13830	Mm.295284	NM_013515	ENSMUSG00000026880	Stom	Epb7.2	stomatin	protein-coding
chr17	87025054	87025828	promoter-TSS (NM_008838)	promoter-TSS (NM_008838)	-40	NM_008838	18701	Mm.219685	NM_008838	ENSMUSG00000024145	Pigf	-	phosphatidylinositol glycan anchor biosynthesis, class F	protein-coding
chr11	101658045	101658975	Intergenic	Intergenic	-7031	NM_025404	80981	Mm.266840	NM_025404	ENSMUSG00000034936	Arl4d	1110036H21Rik|ARL6|AW456149|Arf4l|Arfl4|Arl5	ADP-ribosylation factor-like 4D	protein-coding
chr7	18910111	18910887	promoter-TSS (NM_001033314)	promoter-TSS (NM_001033314)	-95	NM_001033314	232933	Mm.333624	NM_001033314	ENSMUSG00000074358	Ccdc61	C530028I08Rik|Gm159	coiled-coil domain containing 61	protein-coding
chr11	70020897	70021782	intron (NM_001109752, intron 1 of 19)	intron (NM_001109752, intron 1 of 19)	-2643	NM_001370671	13385	Mm.27256	NM_007864	ENSMUSG00000020886	Dlg4	Dlgh4|PSD-95|PSD95|SAP90|SAP90A	discs large MAGUK scaffold protein 4	protein-coding
chr5	143413940	143414950	intron (NM_025841, intron 2 of 4)	B3A|SINE|B2	10625	NM_025841	66913	Mm.181880	NM_025841	ENSMUSG00000079111	Kdelr2	1110007A14Rik	KDEL (Lys-Asp-Glu-Leu) endoplasmic reticulum protein retention receptor 2	protein-coding
chr7	28638643	28639117	Intergenic	ZP3AR|Satellite|Satellite	-7967	NM_175319	101744	Mm.26022	NM_175319	ENSMUSG00000037469	Acp7	AU017076|C330005M16Rik|Papl	acid phosphatase 7, tartrate resistant	protein-coding
chr4	90979511	90980609	Intergenic	L1Md_T|LINE|L1	391995	NM_010486	15569	Mm.318042	NM_010486	ENSMUSG00000008489	Elavl2	Hub|mel-N1	ELAV like RNA binding protein 1	protein-coding
chr11	119040715	119041425	promoter-TSS (NM_013926)	promoter-TSS (NM_013926)	-157	NM_013926	30951	Mm.99953	NM_013926	ENSMUSG00000025578	Cbx8	Pc3	chromobox 8	protein-coding
chrX	18505501	18505856	Intergenic	L1Md_T|LINE|L1	-44281	NM_175228	75905	Mm.159617	NM_175228	ENSMUSG00000037358	Dipk2b	4930578C19Rik	divergent protein kinase domain 2B	protein-coding
chr17	46680589	46681381	promoter-TSS (NM_010787)	promoter-TSS (NM_010787)	-1	NM_001277309	17256	Mm.329083	NM_010787	ENSMUSG00000002768	Mea1	Mea-1	male enhanced antigen 1	protein-coding
chr7	28202508	28203415	Intergenic	ZP3AR|Satellite|Satellite	22645	NM_001271370	13549	Mm.57249	NM_010092	ENSMUSG00000002409	Dyrk1b	Mirk	dual-specificity tyrosine-(Y)-phosphorylation regulated kinase 1b	protein-coding
chr7	38200679	38201235	Intergenic	Intergenic	17170	NM_028166	72244	Mm.187554	NM_028166		1600014C10Rik	AI428873	RIKEN cDNA 1600014C10 gene	protein-coding
chr2	34372450	34373311	promoter-TSS (NM_016768)	promoter-TSS (NM_016768)	-835	NM_001290576	18516	Mm.239941	NM_016768	ENSMUSG00000038718	Pbx3	-	pre B cell leukemia homeobox 3	protein-coding
chr12	52503528	52504222	Intergenic	CpG	-12202	NM_009706	11855	Mm.35059	NM_009706	ENSMUSG00000035133	Arhgap5	p190-B|p190B	Rho GTPase activating protein 5	protein-coding
chrX	141567251	141568607	intron (NM_001163155, intron 4 of 50)	L1Md_T|LINE|L1	92510	NM_001163155	12830	Mm.286892	NM_007736	ENSMUSG00000031274	Col4a5	-	collagen, type IV, alpha 5	protein-coding
chr14	6426585	6427728	Intergenic	CpG	-139906	NM_001270812	100861615	Mm.488431	NM_001270812	ENSMUSG00000079396	LOC100861615	-	alpha takusan-like	protein-coding
chr12	20196164	20197657	Intergenic	CpG	618869	NR_015521	69513	Mm.273972	NR_015521	ENSMUSG00000099759	1700030C10Rik	-	RIKEN cDNA 1700030C10 gene	ncRNA
chr9	80164435	80165277	promoter-TSS (NM_001039546)	promoter-TSS (NM_001039546)	-178	NM_001039546	17920	Mm.4040	NM_008662	ENSMUSG00000033577	Myo6	BC029719|Myo6<rsv>|Tlc|rsv|sv	myosin VI	protein-coding
chrX	73716175	73716770	promoter-TSS (NM_007435)	promoter-TSS (NM_007435)	-125	NM_007435	11666	Mm.365	NM_007435	ENSMUSG00000031378	Abcd1	ALDP|Ald|Aldgh	ATP-binding cassette, sub-family D (ALD), member 1	protein-coding
chr5	71095862	71096388	promoter-TSS (NM_008066)	promoter-TSS (NM_008066)	-276	NM_008066	14395	Mm.5304	NM_008066	ENSMUSG00000000560	Gabra2	C630048P16Rik|Gabra-2	gamma-aminobutyric acid (GABA) A receptor, subunit alpha 2	protein-coding
chr2	173659064	173660053	promoter-TSS (NR_027957)	promoter-TSS (NR_027957)	-19	NR_027957	100043911	Mm.260590	NM_001033179	ENSMUSG00000055897	Ppp4r1l-ps	1700007P14Rik|5830403E09Rik|C030010B13Rik|Ppp4r1l	protein phosphatase 4, regulatory subunit 1-like, pseudogene	pseudo
chr12	71830783	71831202	promoter-TSS (NM_172464)	promoter-TSS (NM_172464)	-76	NM_172464	208846	Mm.87417	NM_026102	ENSMUSG00000034574	Daam1	-	dishevelled associated activator of morphogenesis 1	protein-coding
chr5	34761350	34762165	promoter-TSS (NM_010414)	promoter-TSS (NM_010414)	17	NM_010414	15194	Mm.209071	NM_010414	ENSMUSG00000029104	Htt	AI256365|C430023I11Rik|Hd|Hdh|IT15	huntingtin	protein-coding
chr11	100397739	100398130	promoter-TSS (NR_132425)	promoter-TSS (NR_132425)	-144	NM_010593	16480	Mm.299774	NM_010593	ENSMUSG00000001552	Jup	Ctnng|D930025P04Rik|PG	junction plakoglobin	protein-coding
chr9	21131055	21131748	promoter-TSS (NM_001205312)	promoter-TSS (NM_001205312)	-126	NM_001205312	54721	Mm.20249	NM_018793	ENSMUSG00000032175	Tyk2	JTK1	tyrosine kinase 2	protein-coding
chr4	109117821	109118247	promoter-TSS (NM_001134791)	promoter-TSS (NM_001134791)	2	NM_001134791	100273	Mm.366315	NM_133885	ENSMUSG00000028559	Osbpl9	2600011I06Rik|AU015843|Orp-9	oxysterol binding protein-like 9	protein-coding
chr18	75005497	75006161	promoter-TSS (NM_001358304)	promoter-TSS (NM_001358304)	-10	NM_001358306	407819	Mm.29866	NM_001001181	ENSMUSG00000036299	BC031181	-	cDNA sequence BC031181	protein-coding
chr14	120032213	120032700	intron (NM_001001490, intron 1 of 3)	intron (NM_001001490, intron 1 of 3)	9979	NM_001001490	239283	Mm.138520	NM_001001490	ENSMUSG00000044819	Oxgr1	Cysltr3|Gm299|Gpr80|Gpr99|P2Y15	oxoglutarate (alpha-ketoglutarate) receptor 1	protein-coding
chr7	3411035	3411552	intron (NM_133190, intron 2 of 3)	intron (NM_133190, intron 2 of 3)	-3773	NR_128566	104795667		NR_128566	ENSMUSG00000094210	Gm23450	Mir935|mmu-mir-935	predicted gene, 23450	ncRNA
chr17	25727261	25727953	promoter-TSS (NM_145409)	promoter-TSS (NM_145409)	-110	NM_001357176	106707	Mm.24603	NM_028009	ENSMUSG00000041199	Rpusd1	2310051D06Rik|AU019540|Rlucl	RNA pseudouridylate synthase domain containing 1	protein-coding
chr11	115627899	115628429	5' UTR (NM_001252396, exon 1 of 6)	5' UTR (NM_001252396, exon 1 of 6)	131	NM_001252396	67283	Mm.383426	NM_026071	ENSMUSG00000020744	Slc25a19	2900089E13Rik|DNC|MUP1|TPC	solute carrier family 25 (mitochondrial thiamine pyrophosphate carrier), member 19	protein-coding
chr14	106964000	106965137	Intergenic	L1Md_T|LINE|L1	-478048	NR_045938	73631	Mm.48862	NR_045938	ENSMUSG00000099794	1700128A07Rik	-	RIKEN cDNA 1700128A07 gene	ncRNA
chr5	115300567	115301274	promoter-TSS (NR_131932)	promoter-TSS (NR_131932)	70	NM_019682	56455	Mm.256858	NM_019682	ENSMUSG00000009013	Dynll1	Dlc8|Dnclc1|Pin	dynein light chain LC8-type 1	protein-coding
chr4	136021491	136021975	promoter-TSS (NM_013736)	promoter-TSS (NM_013736)	-84	NM_013736	27224	Mm.27663	NM_013736	ENSMUSG00000028668	Eloa	110kDa|AA408125|Tceb3|Tceb3a	elongin A	protein-coding
chr17	56830867	56831575	promoter-TSS (NM_009056)	promoter-TSS (NM_009056)	-213	NM_027787	19725	Mm.102	NM_009056	ENSMUSG00000024206	Rfx2	5430432H19Rik	regulatory factor X, 2 (influences HLA class II expression)	protein-coding
chr1	133130999	133131771	5' UTR (NM_133819, exon 1 of 2)	5' UTR (NM_133819, exon 1 of 2)	219	NM_133819	108954	Mm.293628	NM_133819	ENSMUSG00000046062	Ppp1r15b	1810033K10Rik|AI606441|C530022L24Rik|CReP	protein phosphatase 1, regulatory subunit 15B	protein-coding
chr17	15041001	15041807	promoter-TSS (NM_001360401)	promoter-TSS (NM_001360401)	-147	NM_001039552	381062	Mm.393767	NM_183133	ENSMUSG00000036552	Ermard	2210404J11Rik|2410011O22Rik|AI448938	ER membrane associated RNA degradation	protein-coding
chr1	130731826	130732098	promoter-TSS (NM_177604)	promoter-TSS (NM_177604)	-14	NM_177604	212439	Mm.268547	NM_177604	ENSMUSG00000042510	AA986860	E030025M07|Sarg	expressed sequence AA986860	protein-coding
chrY	7036151	7037688	Intergenic	Intergenic	130858	NM_001101623	100040160	Mm.482062	NM_001101623	ENSMUSG00000094081	Gm20826	-	predicted gene, 20826	protein-coding
chr11	20631424	20632513	promoter-TSS (NM_001038625)	promoter-TSS (NM_001038625)	-9	NM_001038625	58172	Mm.339676	NM_021372	ENSMUSG00000049800	Sertad2	AB041541|AU021878|Kiaa0127|MNCb-1504|SEI-2|Sei2|TRIP-Br2|mKIAA0127	SERTA domain containing 2	protein-coding
chr13	3109470	3111076	Intergenic	L1Md_Gf|LINE|L1	-39202	NR_001581	73266	Mm.335891	NR_001581	ENSMUSG00000091304	Speer6-ps1	1700039A02Rik|Alb-cre|Alb<cre>|AlbCre|SPEER-6|Tg(Alb-cre)21Mgn|albumin-cre|cr<Alb>	spermatogenesis associated glutamate (E)-rich protein 6, pseudogene 1	pseudo
chr8	20296598	20298023	intron (NR_030708, intron 1 of 4)	CpG	122	NR_030708	547150	Mm.359054	NR_030708	ENSMUSG00000071796	6820431F20Rik	-	cadherin 11 pseudogene	pseudo
chr8	25016650	25017385	promoter-TSS (NM_027194)	promoter-TSS (NM_027194)	-95	NM_001270996	11502	Mm.28908	NM_007404	ENSMUSG00000031555	Adam9	AU020942|MDC9|Mltng|mKIAA0021	a disintegrin and metallopeptidase domain 9 (meltrin gamma)	protein-coding
chr3	51483570	51484257	promoter-TSS (NM_016858)	promoter-TSS (NM_016858)	-53	NM_016858	19338	Mm.1664	NM_016858	ENSMUSG00000027739	Rab33b	-	RAB33B, member RAS oncogene family	protein-coding
chr1	44480512	44481657	Intergenic	L1Md_T|LINE|L1	-70587	NM_028450	70676	Mm.133132	NM_027506	ENSMUSG00000056870	Gulp1	3110030A04Rik|5730529O06Rik|CED-6|Ced6|GULP|Gulp-2	GULP, engulfment adaptor PTB domain containing 1	protein-coding
chr2	129198281	129198970	promoter-TSS (NM_001159593)	promoter-TSS (NM_001159593)	-148	NM_001159593	20515	Mm.272675	NM_015747	ENSMUSG00000027397	Slc20a1	AI607883|Glvr-1|Glvr1	solute carrier family 20, member 1	protein-coding
chr17	35916126	35916932	promoter-TSS (NM_025878)	promoter-TSS (NM_025878)	-89	NM_001361454	66973	Mm.29484	NM_025878	ENSMUSG00000024436	Mrps18b	2400002C15Rik|MRP-S18-2|S18mt-b	mitochondrial ribosomal protein S18B	protein-coding
chr11	78550607	78551141	promoter-TSS (NM_133706)	promoter-TSS (NM_133706)	-139	NM_133706	69071	Mm.29431	NM_133706	ENSMUSG00000037278	Tmem97	1810014L12Rik|AI115531|AL022956|D11Bhm182e	transmembrane protein 97	protein-coding
chr18	46525359	46526374	5' UTR (NM_173423, exon 1 of 3)	5' UTR (NM_173423, exon 1 of 3)	105	NM_173423	240263	Mm.38249	NM_173423	ENSMUSG00000033319	Fem1c	2610312A07Rik|3632443A22Rik|AI646567	fem-1 homolog c (C.elegans)	protein-coding
chrY	90809957	90811063	intron (NM_133362, intron 2 of 3)	intron (NM_133362, intron 2 of 3)	25068	NR_137282	170942	Mm.76062	NM_133362	ENSMUSG00000096768	Erdr1	edr	erythroid differentiation regulator 1	protein-coding
chr19	44284150	44284717	Intergenic	CpG	-9243	NM_009128	20250	Mm.487021	NM_009128	ENSMUSG00000025203	Scd2	Mir5114|Scd-2|mir-5114|swty	stearoyl-Coenzyme A desaturase 2	protein-coding
chr17	17909826	17910466	Intergenic	CpG	22322	NM_008039	14289	Mm.378918	NM_008039	ENSMUSG00000052270	Fpr2	E330010I07Rik|Fpr-rs2	formyl peptide receptor 2	protein-coding
chr19	49340350	49341531	Intergenic	L1Md_T|LINE|L1	1134915	NM_025696	66673	Mm.70980	NM_025696	ENSMUSG00000063434	Sorcs3	6330404A12Rik|AW045579	sortilin-related VPS10 domain containing receptor 3	protein-coding
chr17	14961375	14962468	promoter-TSS (NM_024250)	promoter-TSS (NM_024250)	-661	NM_001360983	72057	Mm.440085	NM_024250	ENSMUSG00000023883	Phf10	1810055P05Rik|AV024533	PHD finger protein 10	protein-coding
chr19	4096695	4097889	promoter-TSS (NM_026373)	promoter-TSS (NM_026373)	-59	NM_026373	52004	Mm.29609	NM_026373	ENSMUSG00000024856	Cdk2ap2	5830466O21Rik|D19Ertd144e|Doc-1r	CDK2-associated protein 2	protein-coding
chr2	53190832	53192172	promoter-TSS (NM_022989)	promoter-TSS (NM_022989)	-248	NM_001371020
chr8	116978500	116979184	promoter-TSS (NM_001357254)	promoter-TSS (NM_001357254)	117	NM_001357253	69528	Mm.272846	NM_027103	ENSMUSG00000031847	1700030J22Rik	-	RIKEN cDNA 1700030J22 gene	protein-coding
chr11	120151085	120151511	promoter-TSS (NM_001164802)	promoter-TSS (NM_001164802)	53	NM_001164800	72055	Mm.253403	NM_024249	ENSMUSG00000061306	Slc38a10	1810073N04Rik	solute carrier family 38, member 10	protein-coding
chr17	56997127	56997662	promoter-TSS (NM_025538)	promoter-TSS (NM_025538)	55	NM_027372	66400	Mm.196150	NM_025538	ENSMUSG00000002661	Alkbh7	2310045B01Rik|2510008E23Rik|Abh7|Spata11	alkB homolog 7	protein-coding
chr6	114553029	114553351	Intergenic	IMPB_01|Satellite|Satellite	-89907	NM_001253717	74244	Mm.275332	NM_028835	ENSMUSG00000030314	Atg7	1810013K23Rik|Agp7|Apg7l|Atg7l|Gm21553	autophagy related 7	protein-coding
chr2	119208537	119209277	promoter-TSS (NM_139139)	promoter-TSS (NM_139139)	-112	NM_139139	69408	Mm.222241	NM_139139	ENSMUSG00000034278	Dnajc17	1700025B16Rik|C87112|D9Bwg1371e	DnaJ heat shock protein family (Hsp40) member C17	protein-coding
chr5	24576986	24577780	promoter-TSS (NM_001190443)	promoter-TSS (NM_001190443)	-37	NM_001359205	27407	Mm.21629	NM_013853	ENSMUSG00000028953	Abcf2	0710005O05Rik|Drr3|E430001O06	ATP-binding cassette, sub-family F (GCN20), member 2	protein-coding
chr1	23382695	23383564	promoter-TSS (NM_001081079)	promoter-TSS (NM_001081079)	46	NM_001081079	70155	Mm.28013	NM_001081079	ENSMUSG00000026158	Ogfrl1	2210417C17Rik	opioid growth factor receptor-like 1	protein-coding
chr5	124439571	124440189	promoter-TSS (NM_001310725)	promoter-TSS (NM_001310725)	-50	NM_030241	67956	Mm.137966	NM_030241	ENSMUSG00000049327	Kmt5a	2410195B05Rik|AA617402|AW536475|PR-SET7|PR/SET07|Setd8	lysine methyltransferase 5A	protein-coding
chr11	45979891	45980717	promoter-TSS (NM_173384)	promoter-TSS (NM_173384)	-6	NM_173384	214105	Mm.66708	NM_173384	ENSMUSG00000040489	Sox30	-	SRY (sex determining region Y)-box 30	protein-coding
chr1	168432162	168432590	promoter-TSS (NM_008783)	promoter-TSS (NM_008783)	-207	NM_001291509	18514	Mm.43358	NM_008783	ENSMUSG00000052534	Pbx1	2310056B04Rik|D230003C07Rik|Pbx-1	pre B cell leukemia homeobox 1	protein-coding
chr6	105663037	105663723	Intergenic	L1Md_T|LINE|L1	14201	NR_132434	102638038	Mm.360282	NR_132434		Gm15631	-	predicted gene 15631	ncRNA
chrX	61968599	61969566	Intergenic	L1Md_T|LINE|L1	259471	NM_001018087	434784	Mm.23468	NM_001018087	ENSMUSG00000057615	Ldoc1	Gm366|Mar7|Mart7|Rtl7|Sirh7	regulator of NFKB signaling	protein-coding
chr3	121967653	121968082	promoter-TSS (NM_001356524)	promoter-TSS (NM_001356524)	61	NM_001356524	214137	Mm.229287	NM_172525	ENSMUSG00000039831	Arhgap29	6720461J18Rik|A830014I19|AU040217|B130017I01Rik|C76601|Parg1	Rho GTPase activating protein 29	protein-coding
chr6	117906593	117908246	promoter-TSS (NM_001166429)	intron (NM_133834, intron 1 of 3)	-385	NM_001166429	98758	Mm.422979	NM_133834	ENSMUSG00000042079	Hnrnpf	4833420I20Rik|AA407306|Hnrpf	heterogeneous nuclear ribonucleoprotein F	protein-coding
chr5	56471618	56472584	Intergenic	L1Md_T|LINE|L1	1245818	NR_015588	319216	Mm.332387	NR_015588	ENSMUSG00000097216	4932441J04Rik	-	RIKEN cDNA 4932441J04 gene	ncRNA
chr3	88492480	88493298	intron (NM_001002011, intron 1 of 11)	intron (NM_001002011, intron 1 of 11)	423	NM_019390	16905	Mm.243014	NM_019390	ENSMUSG00000028063	Lmna	Dhe	lamin A	protein-coding
chr12	20815150	20816217	promoter-TSS (NR_015521)	promoter-TSS (NR_015521)	96	NR_015521	69513	Mm.273972	NR_015521	ENSMUSG00000099759	1700030C10Rik	-	RIKEN cDNA 1700030C10 gene	ncRNA
chr15	38519013	38519768	promoter-TSS (NM_001301688)	promoter-TSS (NM_001301688)	-124	NM_001301688	54375	Mm.250214	NM_018745	ENSMUSG00000037458	Azin1	1700085L02Rik|AZI|Oazi|Oazin	antizyme inhibitor 1	protein-coding
chr5	144366488	144366793	Intergenic	ZP3AR|Satellite|Satellite	8115	NR_102373	100579137		NR_102372	ENSMUSG00000104600	Dmrt1i	Dmr	Dmrt1 interacting ncRNA	ncRNA
chr7	30321972	30322577	exon (NM_001033140, exon 1 of 1)	exon (NM_001033140, exon 1 of 1)	101	NM_001033140	68332	Mm.6844	NM_001033140	ENSMUSG00000074211	Sdhaf1	0610010E21Rik|AI430885|AW490662|Lyrm8	succinate dehydrogenase complex assembly factor 1	protein-coding
chr11	45769852	45770833	Intergenic	L1Md_T|LINE|L1	-37741	NR_045876	100009664	Mm.415439	NR_045876		F630206G17Rik	-	RIKEN cDNA F630206G17 gene	ncRNA
chr17	15825722	15826934	5' UTR (NM_178615, exon 1 of 3)	5' UTR (NM_178615, exon 1 of 3)	258	NM_178615	68799	Mm.293466	NM_178615	ENSMUSG00000048027	Rgmb	1110059F19Rik|DRAGON	repulsive guidance molecule family member B	protein-coding
chr8	83954982	83955929	promoter-TSS (NM_024184)	promoter-TSS (NM_024184)	-239	NM_024184	66929	Mm.29680	NM_024184	ENSMUSG00000005470	Asf1b	1700003K02Rik|AA409591	anti-silencing function 1B histone chaperone	protein-coding
chr17	21650424	21650884	promoter-TSS (NM_001166497)	promoter-TSS (NM_001166497)	43	NM_001166497	73229	Mm.296733	NM_001166497	ENSMUSG00000035868	Zfp983	3110052M02Rik|mszf57|mszf71	zinc finger protein 983	protein-coding
chr17	88065838	88066537	promoter-TSS (NM_001081034)	promoter-TSS (NM_001081034)	-896	NM_001081034	225055	Mm.386857	NM_001081034	ENSMUSG00000005371	Fbxo11	C80048|Jf	F-box protein 11	protein-coding
chr11	87108758	87109529	promoter-TSS (NM_025377)	promoter-TSS (NM_025377)	-118	NM_025377	66140	Mm.45008	NM_025377	ENSMUSG00000020492	Ska2	1110001A07Rik|C78640|Fam33a	spindle and kinetochore associated complex subunit 2	protein-coding
chr5	142905571	142906703	intron (NM_007393, intron 1 of 5)	CpG	617	NM_007393	11461	Mm.328431	NM_007393	ENSMUSG00000029580	Actb	Actx|E430023M04Rik|beta-actin	actin, beta	protein-coding
chr6	122810791	122811535	Intergenic	Intergenic	-9021	NM_021899	60611	Mm.87142	NM_021899	ENSMUSG00000003154	Foxj2	Fhx	forkhead box J2	protein-coding
chr11	4849108	4849772	5' UTR (NM_001252250, exon 1 of 17)	5' UTR (NM_001252250, exon 1 of 17)	104	NM_001252252	18016	Mm.297109	NM_010898	ENSMUSG00000009073	Nf2	merlin	neurofibromin 2	protein-coding
chr16	16507391	16508325	intron (NM_001301817, intron 1 of 16)	L1Md_T|LINE|L1	19553	NM_001301818	224014	Mm.256131	NM_139232	ENSMUSG00000022788	Fgd4	9030023J02Rik|9330209B17Rik|Frabp|ZFYVE6	FYVE, RhoGEF and PH domain containing 4	protein-coding
chr4	107178133	107179040	promoter-TSS (NM_025617)	promoter-TSS (NM_025617)	-44	NM_029565	56374	Mm.291192	NM_029565	ENSMUSG00000028618	Tmem59	1110001M20Rik|3110046P06Rik|AI256529|D4Ertd20e|MTDCF1|ORF18	transmembrane protein 59	protein-coding
chr11	40754936	40755697	promoter-TSS (NM_009831)	promoter-TSS (NM_009831)	-30	NM_009831	12450	Mm.2103	NM_009831	ENSMUSG00000020326	Ccng1	AI314029	cyclin G1	protein-coding
chr5	120612499	120613434	promoter-TSS (NM_028041)	promoter-TSS (NM_028041)	-164	NM_028041	71990	Mm.24495	NM_028041	ENSMUSG00000029599	Ddx54	2410015A15Rik|AI414901|DP97	DEAD (Asp-Glu-Ala-Asp) box polypeptide 54	protein-coding
chr5	34659841	34660586	promoter-TSS (NM_019497)	promoter-TSS (NM_019497)	-65	NM_029278	75416	Mm.40292	NM_029278	ENSMUSG00000036693	Nop14	2610033H07Rik|Nol14	NOP14 nucleolar protein	protein-coding
chr6	71925260	71925557	intron (NM_009088, intron 7 of 33)	intron (NM_009088, intron 7 of 33)	16355	NM_009088	20019	Mm.135581	NM_009088	ENSMUSG00000049553	Polr1a	194kDa|2900087K15Rik|3010014K16Rik|RPA194|Rpo1-4|mRPA1	polymerase (RNA) I polypeptide A	protein-coding
chr5	128947719	128948301	intron (NM_001310733, intron 1 of 20)	ZP3AR|Satellite|Satellite	5476	NM_001310733	231760	Mm.233996	NM_001081388	ENSMUSG00000029420	Rimbp2	A930033C01Rik|mKIAA0318	RIMS binding protein 2	protein-coding
chr15	98533727	98534529	non-coding (NR_153345, exon 1 of 11)	non-coding (NR_153345, exon 1 of 11)	141	NR_153345	69612	Mm.229107	NM_133714	ENSMUSG00000022992	Kansl2	2310037I24Rik|B930009D17	KAT8 regulatory NSL complex subunit 2	protein-coding
chr5	141723679	141724302	intron (NM_177879, intron 4 of 44)	ZP3AR|Satellite|Satellite	482456	NM_177879	330222	Mm.151931	NM_177879	ENSMUSG00000039683	Sdk1	5330440E10|6720466O15Rik	sidekick cell adhesion molecule 1	protein-coding
chr19	6363390	6364209	non-coding (NR_122118, exon 1 of 12)	non-coding (NR_122118, exon 1 of 12)	109	NM_011750	22668	Mm.256422	NM_011750	ENSMUSG00000024949	Sf1	BBP|MZFM|WBP4|Zfp162	splicing factor 1	protein-coding
chr9	12740028	12740903	Intergenic	L1Md_T|LINE|L1	365390	NR_040755	78219	Mm.414868	NR_040755	ENSMUSG00000111830	4930568E12Rik	-	RIKEN cDNA 4930568E12 gene	ncRNA
chr4	55349496	55350471	promoter-TSS (NM_009011)	promoter-TSS (NM_009011)	-59	NM_009011	19359	Mm.196846	NM_009011	ENSMUSG00000028426	Rad23b	0610007D13Rik|AV001138|HR23B|mHR23B|p58	RAD23 homolog B, nucleotide excision repair protein	protein-coding
chr16	94289870	94290723	promoter-TSS (NM_001360045)	promoter-TSS (NM_001360045)	-5	NM_001360045	110948	Mm.30921	NM_139145	ENSMUSG00000040820	Hlcs	410I21.SP6|D16Jhu34	holocarboxylase synthetase (biotin- [propriony-Coenzyme A-carboxylase (ATP-hydrolysing)] ligase)	protein-coding
chr4	12906708	12907271	intron (NM_173746, intron 1 of 4)	CpG	152	NM_001171801	208820	Mm.12057	NM_173746	ENSMUSG00000055963	Triqk	C130086A10|Gm11818	triple QxxK/R motif containing	protein-coding
chr4	91654765	91655854	Intergenic	L1Md_T|LINE|L1	-255325	NM_207685	15569	Mm.318042	NM_010486	ENSMUSG00000008489	Elavl2	Hub|mel-N1	ELAV like RNA binding protein 1	protein-coding
chr4	122712428	122713681	Intergenic	L1Md_T|LINE|L1	23795	NM_023865	77432	Mm.491436	NM_023865	ENSMUSG00000023263	9530002B09Rik	Aump|Vpp1|Vppl	RIKEN cDNA 9530002B09 gene	protein-coding
chr13	85288927	85289675	5' UTR (NM_145452, exon 1 of 25)	5' UTR (NM_145452, exon 1 of 25)	185	NM_145452	218397	Mm.259653	NM_145452	ENSMUSG00000021549	Rasa1	Gap|RasGAP|Rasa	RAS p21 protein activator 1	protein-coding
chr16	52452286	52453549	5' UTR (NM_001331110, exon 1 of 15)	5' UTR (NM_001331110, exon 1 of 15)	164	NM_009655	11658	Mm.288282	NM_009655	ENSMUSG00000022636	Alcam	AI853494|BEN|CD166|DM-GRASP|MuSC|SC1	activated leukocyte cell adhesion molecule	protein-coding
chr10	112173345	112174718	intron (NM_001310675, intron 2 of 17)	L1Md_T|LINE|L1	8355	NM_178278	353025	Mm.194428	NM_178278	ENSMUSG00000035694	Caps2	D630005B03Rik	calcyphosphine 2	protein-coding
chr16	10542732	10543289	promoter-TSS (NM_021428)	promoter-TSS (NM_021428)	44	NM_021428	58239	Mm.353006	NM_021428	ENSMUSG00000038055	Dexi	1810029J14Rik|AI836170|AW413143|D16Bwg0586e|Myle	dexamethasone-induced transcript	protein-coding
chr8	83607893	83608777	promoter-TSS (NM_001308227)	promoter-TSS (NM_001308227)	160	NM_018808	81489	Mm.282092	NM_018808	ENSMUSG00000005483	Dnajb1	0610007I11Rik|DjB1|HSPF1|Hdj1|Hsp40	DnaJ heat shock protein family (Hsp40) member B1	protein-coding
chr3	36862780	36863574	promoter-TSS (NM_172679)	promoter-TSS (NM_172679)	71	NM_172679	229227	Mm.207907	NM_172679	ENSMUSG00000037270	4932438A13Rik	4732443H21|B830039D19Rik|D630029K19Rik|FSA|Kiaa1109|Tweek	RIKEN cDNA 4932438A13 gene	protein-coding
chr6	108271934	108273186	intron (NM_010585, intron 4 of 61)	L1Md_T|LINE|L1	59464	NM_010585	16438	Mm.227912	NM_010585	ENSMUSG00000030102	Itpr1	D6Pas2|Gm10429|IP3R 1|IP3R1|InsP3R|Ip3r|Itpr-1|P400|Pcp-1|Pcp1|insP3R1|opt|wblo	inositol 1,4,5-trisphosphate receptor 1	protein-coding
chr2	29304558	29305193	Intergenic	L1Md_T|LINE|L1	-41935	NM_026896	68975	Mm.330109	NM_026896	ENSMUSG00000026799	Med27	1500015J03Rik|2310042P07Rik|AA682045|Crsp8|D2Ertd434e	mediator complex subunit 27	protein-coding
chrY	6821494	6822283	Intergenic	RMER1B|Other|Other	345889	NM_001101623	100040160	Mm.482062	NM_001101623	ENSMUSG00000094081	Gm20826	-	predicted gene, 20826	protein-coding
chr8	9551265	9552105	intron (NM_173446, intron 1 of 2)	L1Md_Gf|LINE|L1	219338	NM_173446	270028	Mm.268163	NM_173446	ENSMUSG00000079157	Fam155a	6430500D16|AW121567|Tmem28	family with sequence similarity 155, member A	protein-coding
chr5	31201415	31202525	promoter-TSS (NM_001177901)	promoter-TSS (NM_001177901)	72	NM_001177901	101023	Mm.45033	NM_175311	ENSMUSG00000043059	Zfp513	AW990386|D430028M17Rik|Znf513	zinc finger protein 513	protein-coding
chr1	134344365	134344859	Intergenic	CpG	-11684	NM_001144855	68507	Mm.295105	NM_001144855	ENSMUSG00000026458	Ppfia4	100042382|1110008G13Rik|AI448359|AI852265|C81506|Gm3812	protein tyrosine phosphatase, receptor type, f polypeptide (PTPRF), interacting protein (liprin), alpha 4	protein-coding
chr7	101969746	101970594	intron (NM_133947, intron 1 of 24)	CpG	327	NM_133947	101706	Mm.27259	NM_133947	ENSMUSG00000066306	Numa1	6720401E04Rik|AA764025|AL022610|AU014979|NuMA	nuclear mitotic apparatus protein 1	protein-coding
chr18	67610591	67611095	promoter-TSS (NM_194355)	promoter-TSS (NM_194355)	63	NM_194355	68166	Mm.208723	NM_176832	ENSMUSG00000024533	Spire1	6030430B19Rik|AI415299|AU022898|AW550622|Spir-1	spire type actin nucleation factor 1	protein-coding
chr7	28372312	28373133	promoter-TSS (NM_001083912)	promoter-TSS (NM_001083912)	-60	NM_001290542	101497	Mm.235700	NM_138752	ENSMUSG00000037552	Plekhg2	AI194308|Clg|Cslg	pleckstrin homology domain containing, family G (with RhoGef domain) member 2	protein-coding
chr12	40222276	40223603	promoter-TSS (NR_035459)	promoter-TSS (NR_035459)	-128	NR_035459	100316693		NR_035459	ENSMUSG00000089371	Mir1938	mir-1938|mmu-mir-1938	microRNA 1938	ncRNA
chr2	30363984	30364323	promoter-TSS (NM_175392)	promoter-TSS (NM_175392)	-80	NM_001242407	108958	Mm.254974	NM_175392	ENSMUSG00000026858	Miga2	5730472N09Rik|AA408683|AI790341|C9orf54|Fam73b|R74766	mitoguardin 2	protein-coding
chr3	26331282	26331951	5' UTR (NM_138666, exon 1 of 8)	5' UTR (NM_138666, exon 1 of 8)	293	NM_138666	192167	Mm.316080	NM_138666	ENSMUSG00000063887	Nlgn1	6330415N05Rik|BB179718|NL1|Nlg1|mKIAA1070	neuroligin 1	protein-coding
chr11	3331908	3332546	exon (NM_178149, exon 3 of 6)	exon (NM_178149, exon 3 of 6)	1496	NM_178149	216505	Mm.390323	NM_178149	ENSMUSG00000034614	Pik3ip1	1500004A08Rik|5830455E04Rik|Crkd|Hgfl	phosphoinositide-3-kinase interacting protein 1	protein-coding
chr19	8785663	8786574	intron (NM_001177798, intron 1 of 11)	CpG	198	NM_146092	225895	Mm.220886	NM_146092	ENSMUSG00000003680	Taf6l	2810417N14Rik|BB223262|C530024J06Rik|Paf65a	TATA-box binding protein associated factor 6 like	protein-coding
chr14	123432651	123433968	intron (NM_177393, intron 13 of 43)	L1Md_T|LINE|L1	193835	NM_177393	338370	Mm.255348	NM_177393	ENSMUSG00000000197	Nalcn	A530023G15Rik|AI849508|Vgcnl1	sodium leak channel, non-selective	protein-coding
chr7	73558157	73558838	promoter-TSS (NR_037569)	promoter-TSS (NR_037569)	-102	NR_037569	69170	Mm.34539	NR_037569	ENSMUSG00000101970	1810026B05Rik	-	RIKEN cDNA 1810026B05 gene	ncRNA
chr2	23938140	23940651	Intergenic	L1Md_T|LINE|L1	109984	NM_080462	140483	Mm.33120	NM_080462	ENSMUSG00000026986	Hnmt	1500031F01Rik|AI788969	histamine N-methyltransferase	protein-coding
chr3	144828520	144829545	intron (NM_139148, intron 9 of 13)	L1Md_T|LINE|L1	-9538	NM_030601	80797	Mm.20897	NM_030601	ENSMUSG00000028262	Clca3a2	Clca2	chloride channel accessory 3A2	protein-coding
chr11	96977408	96978143	promoter-TSS (NM_030220)	promoter-TSS (NM_030220)	-87	NM_001080964	78912	Mm.491183	NM_030220	ENSMUSG00000018678	Sp2	4930480I16Rik|mKIAA0048	Sp2 transcription factor	protein-coding
chr8	113634860	113635826	promoter-TSS (NM_173015)	promoter-TSS (NM_173015)	-243	NM_001048143	270096	Mm.74689	NM_173015	ENSMUSG00000078908	Mon1b	5031407H10|5033413H12Rik	MON1 homolog B, secretory traffciking associated	protein-coding
chr11	106193335	106194125	promoter-TSS (NM_001252448)	promoter-TSS (NM_001252448)	-127	NM_028126	72149	Mm.403722	NM_028126	ENSMUSG00000069631	Strada	2610019A05Rik|6030402H20Rik|AI480680|E130112C09Rik	STE20-related kinase adaptor alpha	protein-coding
chr6	77979374	77980149	promoter-TSS (NM_001109764)	promoter-TSS (NM_001109764)	-94	NM_001355193	12386	Mm.34637	NM_009819	ENSMUSG00000063063	Ctnna2	AI481747|Catna|Catna2|cdf|chp	catenin (cadherin associated protein), alpha 2	protein-coding
chr17	24470073	24471196	exon (NM_025954, exon 1 of 2)	exon (NM_025954, exon 1 of 2)	208	NM_025954	67078	Mm.28541	NM_025954	ENSMUSG00000043445	Pgp	1700012G19Rik|AI481330|AUM|G3PP	phosphoglycolate phosphatase	protein-coding
chr11	52098506	52099562	5' UTR (NM_019411, exon 1 of 7)	5' UTR (NM_019411, exon 1 of 7)	210	NM_019411	19052	Mm.260288	NM_019411	ENSMUSG00000020349	Ppp2ca	PP2A|R75353	protein phosphatase 2 (formerly 2A), catalytic subunit, alpha isoform	protein-coding
chr9	90450618	90450851	Intergenic	MTC|LTR|ERVL-MaLR	-179965	NM_194334	67016	Mm.335347	NM_194334	ENSMUSG00000037410	Tbc1d2b	1810061M12Rik|AI480956|AV021536|AV023399|AW491493|mKIAA1055	TBC1 domain family, member 2B	protein-coding
chr14	6888767	6890451	Intergenic	CpG	-132552	NM_001309401	100041151	Mm.396155	NM_001309401	ENSMUSG00000091754	Gm3636	100042043	predicted gene 3636	protein-coding
chr1	54250328	54250966	promoter-TSS (NM_030025)	promoter-TSS (NM_030025)	-36	NM_030025	78016	Mm.67455	NM_030025	ENSMUSG00000025983	Ccdc150	4930511H11Rik	coiled-coil domain containing 150	protein-coding
chr13	97308490	97308798	Intergenic	Intergenic	67539	NM_007930	13803	Mm.241073	NM_007930	ENSMUSG00000041773	Enc1	Nrpb|PIG10	ectodermal-neural cortex 1	protein-coding
chr17	3080164	3080893	intron (NR_003519, intron 2 of 7)	intron (NR_003519, intron 2 of 7)	3655	NR_003519	328734	Mm.335641	NR_003519		Pisd-ps2	D030013I16Rik	phosphatidylserine decarboxylase, pseudogene 2	pseudo
chr1	36511501	36512950	exon (NM_053186, exon 1 of 8)	exon (NM_053186, exon 1 of 8)	358	NM_001039551	94218	Mm.256323	NM_053186	ENSMUSG00000001138	Cnnm3	Acdp3|Clp3|mACDP3	cyclin M3	protein-coding
chr12	108275224	108275811	promoter-TSS (NM_001159910)	promoter-TSS (NM_001159910)	-124	NM_001159910	668158		NM_001159910	ENSMUSG00000084883	Ccdc85c	EG668158|Gm265|Gm9010|hhy	coiled-coil domain containing 85C	protein-coding
chr8	88696711	88697280	promoter-TSS (NM_001128170)	promoter-TSS (NM_001128170)	-33	NM_001128170	74256	Mm.490395	NM_173369	ENSMUSG00000036712	Cyld	2010013M14Rik|2900009M21Rik|C130039D01Rik|CDMT|CYLD1|EAC|mKIAA0849	CYLD lysine 63 deubiquitinase	protein-coding
chr7	46639392	46640221	promoter-TSS (NM_013789)	promoter-TSS (NM_013789)	1	NM_013789	27414	Mm.76659	NM_013789	ENSMUSG00000030839	Sergef	DelGEF|Gef|Gnef|Gnefr	secretion regulating guanine nucleotide exchange factor	protein-coding
chr12	32819865	32820918	promoter-TSS (NM_021524)	promoter-TSS (NM_021524)	56	NM_021524	59027	Mm.202727	NM_021524	ENSMUSG00000020572	Nampt	1110035O14Rik|AI314458|AI480535|NAmPRTase|Pbef|Pbef1|Visfatin	nicotinamide phosphoribosyltransferase	protein-coding
chr2	100765920	100766987	Intergenic	L1Md_A|LINE|L1	854593	NM_001362687	68170	Mm.31263	NM_026592	ENSMUSG00000027165	B230118H07Rik	NWC	RIKEN cDNA B230118H07 gene	protein-coding
chr6	71632387	71633587	promoter-TSS (NM_173001)	promoter-TSS (NM_173001)	-70	NM_001362200	104263	Mm.260479	NM_173001	ENSMUSG00000053470	Kdm3a	1700105C21Rik|C230043E16Rik|JHDM2a|Jmjd1|Jmjd1a|KDM2A|TGSA|Tsga	lysine (K)-specific demethylase 3A	protein-coding
chr5	102408902	102410127	Intergenic	L1Md_T|LINE|L1	-71877	NM_029270	231532	Mm.440191	NM_029270	ENSMUSG00000057315	Arhgap24	0610025G21Rik	Rho GTPase activating protein 24	protein-coding
chr3	33768195	33769031	Intergenic	L1Md_T|LINE|L1	-31570	NM_001290502	67120	Mm.275710	NM_025978	ENSMUSG00000027677	Ttc14	2700016E08Rik|4930434D01Rik|4931403I22Rik|4933402I15Rik|AI662468|AU014779|AW561908|cI-44|mKIAA1980	tetratricopeptide repeat domain 14	protein-coding
chrX	123500310	123500828	Intergenic	Intergenic	-287266	NR_152852	100302634	Mm.417665	NR_152852	ENSMUSG00000095005	Astx6	Gm14949	amplified spermatogenic transcripts X encoded 6	ncRNA
chr4	123917041	123917855	promoter-TSS (NM_017475)	promoter-TSS (NM_017475)	15	NM_017475	54170	Mm.220922	NM_017475	ENSMUSG00000028646	Rragc	AU041672|Gtr2|RAGC|TIB929|YGR163W	Ras-related GTP binding C	protein-coding
chr18	23803584	23804230	promoter-TSS (NM_153058)	promoter-TSS (NM_153058)	-63	NM_153058	212307	Mm.132237	NM_153058	ENSMUSG00000024277	Mapre2	AI314113|C820009F03Rik|D18Abb1e|EB1|EB2|RP1	microtubule-associated protein, RP/EB family, member 2	protein-coding
chr10	86705200	86706125	promoter-TSS (NM_011631)	promoter-TSS (NM_011631)	-149	NM_001003910	103220	Mm.440762	NM_153595	ENSMUSG00000044937	Ttc41	AI449705|AU041509|Gnn	tetratricopeptide repeat domain 41	protein-coding
chr6	103581072	103582182	intron (NM_007697, intron 2 of 26)	L1Md_T|LINE|L1	70751	NM_007697	12661	Mm.251288	NM_007697	ENSMUSG00000030077	Chl1	A530023M13Rik|AI465420|CALL|LICAM2	cell adhesion molecule L1-like	protein-coding
chr15	81465963	81466900	exon (NM_019712, exon 1 of 5)	exon (NM_019712, exon 1 of 5)	115	NM_019712	56438	Mm.29405	NM_019712	ENSMUSG00000022400	Rbx1	1500002P15Rik|AA517855|ROC1	ring-box 1	protein-coding
chr2	24974761	24975806	promoter-TSS (NM_001031808)	promoter-TSS (NM_001031808)	-185	NM_001031808	107733	Mm.23010	NM_001031808	ENSMUSG00000036850	Mrpl41	MRP-L27|Rpml27	mitochondrial ribosomal protein L41	protein-coding
chr9	44379095	44379834	promoter-TSS (NM_021395)	promoter-TSS (NM_021395)	-26	NM_021395	12282	Mm.116721	NM_021395	ENSMUSG00000032115	Hyou1	AI415631|CBP-140|Cab140|Grp170|Orp150	hypoxia up-regulated 1	protein-coding
chr9	26806182	26806670	promoter-TSS (NM_153803)	promoter-TSS (NM_153803)	42	NM_001310768	244757	Mm.293696	NM_153803	ENSMUSG00000036395	Glb1l2	-	galactosidase, beta 1-like 2	protein-coding
chr14	80089165	80090618	Intergenic	L1Md_T|LINE|L1	89589	NM_001351947	380924	Mm.26456	NM_001030294	ENSMUSG00000022026	Olfm4	GC1|GW112|Gm296|Gm913|OlfD|pPD4	olfactomedin 4	protein-coding
chr1	74587569	74588430	promoter-TSS (NM_001310668)	promoter-TSS (NM_001310668)	29	NM_001310668	77264	Mm.207298	NM_029888	ENSMUSG00000026135	Zfp142	9330177B18Rik|BB154236|mKIAA0236	zinc finger protein 142	protein-coding
chr6	29347548	29348444	promoter-TSS (NM_007594)	promoter-TSS (NM_007594)	-110	NM_007594	12321	Mm.392075	NM_007594	ENSMUSG00000029767	Calu	9530075H20Rik	calumenin	protein-coding
chrX	149779391	149779775	Intergenic	Intergenic	-4896	NM_001114400	434866	Mm.491025	NM_001114400	ENSMUSG00000096834	Gm15127	-	predicted gene 15127	protein-coding
chr14	8172684	8173321	promoter-TSS (NM_024221)	promoter-TSS (NM_024221)	-10	NM_024221	68263	Mm.301527	NM_024221	ENSMUSG00000021748	Pdhb	2610103L06Rik|AL024199|C81408	pyruvate dehydrogenase (lipoamide) beta	protein-coding
chr13	19395535	19396073	promoter-TSS (NM_001347485)	promoter-TSS (NM_001347485)	9	NM_024270	76205	Mm.41940	NM_024270	ENSMUSG00000003062	Stard3nl	0610035N01Rik|6530409L22Rik|AW124774|MENTHO	STARD3 N-terminal like	protein-coding
chr12	36486260	36487105	intron (NR_037309, intron 2 of 2)	L1Md_T|LINE|L1	71066	NR_037309	100499526		NR_037309	ENSMUSG00000092917	Mir3472	mmu-mir-3472	microRNA 3472	ncRNA
chrY	90721699	90724193	Intergenic	Intergenic	32104	NR_137283	654820	Mm.34441	NM_001039559	ENSMUSG00000072844	G530011O06Rik	-	RIKEN cDNA G530011O06 gene	ncRNA
chr14	4018185	4019907	Intergenic	CpG	-4895	NM_001029930	545007	Mm.449725	NM_001029930	ENSMUSG00000096775	Gm5796	-	predicted gene 5796	protein-coding
chr7	36046241	36046653	Intergenic	Intergenic	-243458	NM_177739	668501	Mm.286296	NM_177739	ENSMUSG00000044452	Zfp507	1810022O10Rik|A230056M16Rik|AL024009|AU021817|BB105092|Gm480|Znf507|mKIAA1084	zinc finger protein 507	protein-coding
chr9	65908764	65909336	promoter-TSS (NM_019797)	promoter-TSS (NM_019797)	40	NM_173185	214897	Mm.325816	NM_173185	ENSMUSG00000032384	Csnk1g1	9130020E21Rik	casein kinase 1, gamma 1	protein-coding
chr3	122984013	122984858	promoter-TSS (NM_133857)	promoter-TSS (NM_133857)	12	NM_133857	99526	Mm.491248	NM_133857	ENSMUSG00000039701	Usp53	AA939927|Phxr3|Sp6|mKIAA1350|mbo	ubiquitin specific peptidase 53	protein-coding
chr3	78494870	78496011	Intergenic	L1Md_T|LINE|L1	650306	NM_001310536	76089	Mm.31220	NM_001099624	ENSMUSG00000062232	Rapgef2	5830453M24Rik|CNRasGEF|Pdzgef1|RA-GEF-1|mKIAA0313|nRapGEP	Rap guanine nucleotide exchange factor (GEF) 2	protein-coding
chr9	44233535	44234406	promoter-TSS (NM_007619)	promoter-TSS (NM_007619)	76	NM_007619	12402	Mm.266871	NM_007619	ENSMUSG00000034342	Cbl	4732447J05Rik|Cbl-2|c-Cbl|cbl	Casitas B-lineage lymphoma	protein-coding
chr4	41348782	41349499	5' UTR (NM_001355509, exon 1 of 6)	5' UTR (NM_001355509, exon 1 of 6)	144	NM_001355509	67123	Mm.289795	NM_023305	ENSMUSG00000028437	Ubap1	2700092A01Rik|NAG20|UBAP-1|Ubap	ubiquitin-associated protein 1	protein-coding
chr10	34434547	34435491	Intergenic	L1Md_T|LINE|L1	-16468	NM_001347463	319638	Mm.73467	NM_176968	ENSMUSG00000039480	Nt5dc1	6030401B09Rik|AW987726|Nt5c2l1	5'-nucleotidase domain containing 1	protein-coding
chr19	33761285	33761785	intron (NM_001322338, intron 1 of 10)	intron (NM_001322338, intron 1 of 10)	416	NM_001322338	101055671		NM_001322338	ENSMUSG00000087303	Lipo2	EG668114|Gm8981	lipase, member O2	protein-coding
chr7	45643509	45644336	intron (NM_172418, intron 7 of 9)	intron (NM_172418, intron 7 of 9)	3945	NM_172418	74490	Mm.107442	NM_172418	ENSMUSG00000042918	Mamstr	2810022D01Rik|5430432N15Rik|AW743872|Mastr	MEF2 activating motif and SAP domain containing transcriptional regulator	protein-coding
chr4	119733381	119734161	Intergenic	CpG	-74826	NM_008191	14916	Mm.278	NM_008191	ENSMUSG00000032978	Guca2b	AV066530|Gcap2|Ugn	guanylate cyclase activator 2b (retina)	protein-coding
chr4	118179601	118180221	5' UTR (NM_001161823, exon 1 of 22)	5' UTR (NM_001161823, exon 1 of 22)	132	NM_172382	230674	Mm.234234	NM_172382	ENSMUSG00000033326	Kdm4a	D4Ertd222e|JHDM3A|Jmjd2|Jmjd2a|mKIAA0677	lysine (K)-specific demethylase 4A	protein-coding
chr6	124662503	124663551	promoter-TSS (NM_145130)	promoter-TSS (NM_145130)	-77	NR_149320	14792	Mm.273915	NM_145130	ENSMUSG00000004270	Lpcat3	C3f|Grcc3f|Lpcat|Lpeat|Lplat5|Lpsat|Mboat5|Moact5|Oact5|PTG	lysophosphatidylcholine acyltransferase 3	protein-coding
chr18	56884015	56884340	intron (NM_177115, intron 1 of 4)	intron (NM_177115, intron 1 of 4)	41371	NM_177115	320253	Mm.312623	NM_177115	ENSMUSG00000032656	2025-03-03	6330411I15Rik|A530081L18Rik|AI843639|MARCH-III	membrane-associated ring finger (C3HC4) 3	protein-coding
chr16	46496508	46497686	promoter-TSS (NM_021496)	promoter-TSS (NM_021496)	-130	NM_021495	58998	Mm.40477	NM_021495	ENSMUSG00000022656	Nectin3	2610301B19Rik|3000002N23Rik|4921513D19Rik|AA407785|AU016832|AW538082|CD113|Pvrl3	nectin cell adhesion molecule 3	protein-coding
chr7	100932122	100932863	promoter-TSS (NM_001081116)	promoter-TSS (NM_001081116)	-331	NM_001081116	207212	Mm.29954	NM_001081116	ENSMUSG00000032875	Arhgef17	8030463K16|AI428794|AW558066|BC035332|mKIAA0337	Rho guanine nucleotide exchange factor (GEF) 17	protein-coding
chr7	28392429	28393307	promoter-TSS (NM_026042)	promoter-TSS (NM_026042)	-128	NM_019458	54624	Mm.7916	NM_019458	ENSMUSG00000003437	Paf1	5730511K23Rik|AA675045	Paf1, RNA polymerase II complex component	protein-coding
chr7	17064131	17064522	Intergenic	ZP3AR|Satellite|Satellite	-1899	NM_001162950	53417	Mm.135110	NM_016868	ENSMUSG00000004328	Hif3a	Ipas|MOP7|NEPAS|bHLHe17	hypoxia inducible factor 3, alpha subunit	protein-coding
chr7	127511890	127513177	non-coding (NR_024331, exon 1 of 1)	non-coding (NR_024331, exon 1 of 1)	336	NR_024331	629159	Mm.256720	NR_024331	ENSMUSG00000101225	1700008J07Rik	AW048743	RIKEN cDNA 1700008J07 gene	ncRNA
chr4	115737510	115737973	promoter-TSS (NM_172698)	promoter-TSS (NM_172698)	-29	NM_001368627	230648	Mm.283565	NM_172698	ENSMUSG00000034210	Efcab14	4732418C07Rik	EF-hand calcium binding domain 14	protein-coding
chr9	103536205	103536451	intron (NM_001359465, intron 2 of 4)	intron (NM_001359465, intron 2 of 4)	-20762	NR_040764	319215	Mm.425597	NR_040764	ENSMUSG00000099616	4932413F04Rik	-	RIKEN cDNA 4932413F04 gene	ncRNA
chr1	64690545	64691516	promoter-TSS (NM_001097644)	promoter-TSS (NM_001097644)	-315	NM_001097644	227210	Mm.39706	NM_001097644	ENSMUSG00000070871	Ccnyl1	9630037P07Rik|AW554339	cyclin Y-like 1	protein-coding
chr16	4541631	4542160	Intergenic	CpG	17825	NM_031182	83383	Mm.273210	NM_031182	ENSMUSG00000005718	Tfap4	AI642933|AP-4|D930048N17Rik|Tcfap4|bHLHc41	transcription factor AP4	protein-coding
chr11	70432239	70432724	promoter-TSS (NM_001271360)	promoter-TSS (NM_001271360)	-99	NM_001271360	216869	Mm.203747	NM_145429	ENSMUSG00000060216	Arrb2	AI326910|AW122872|Arr3	arrestin, beta 2	protein-coding
chr11	78261250	78262246	promoter-TSS (NM_001002004)	promoter-TSS (NM_001002004)	-6	NM_001002004	72503	Mm.237103	NM_001002004	ENSMUSG00000010277	2610507B11Rik	AU022687|D11Bhm178e|D11Bhm179e|E1|Kiaa0100|mKIAA0100	RIKEN cDNA 2610507B11 gene	protein-coding
chr9	111271425	111271940	promoter-TSS (NM_175266)	promoter-TSS (NM_175266)	-74	NM_001324522	17350	Mm.486383	NM_026810	ENSMUSG00000032498	Mlh1	1110035C23Rik|AI317206|AI325952|AI561766	mutL homolog 1	protein-coding
chr1	175625196	175625785	exon (NM_010209, exon 1 of 10)	exon (NM_010209, exon 1 of 10)	145	NM_010209	14194	Mm.41502	NM_010209	ENSMUSG00000026526	Fh1	Fh|Fh-1	fumarate hydratase 1	protein-coding
chr16	20548091	20548915	promoter-TSS (NM_013852)	promoter-TSS (NM_013852)	53	NR_030670	100042948	Mm.406754	NR_030670	ENSMUSG00000080797	Gm15760	-	mitochondrial ribosomal protein S18B pseudogene	pseudo
chr2	13271046	13271646	promoter-TSS (NM_009105)	promoter-TSS (NM_009105)	69	NM_009105	20163	Mm.905	NM_009105	ENSMUSG00000026727	Rsu1	RsuI|rsp-1	Ras suppressor protein 1	protein-coding
chr2	175109952	175110382	Intergenic	Intergenic	-42398	NM_001085546	664987		NM_001085546	ENSMUSG00000078905	Gm14393	-	predicted gene 14393	protein-coding
chr7	27195817	27196434	promoter-TSS (NM_001046637)	promoter-TSS (NM_001046637)	146	NM_001285825	53607	Mm.386890	NM_015782	ENSMUSG00000061479	Snrpa	C430021M15Rik|Rnu1a-1|Rnu1a1|U1-A|U1A	small nuclear ribonucleoprotein polypeptide A	protein-coding
chr12	3309570	3310456	promoter-TSS (NM_016676)	promoter-TSS (NM_016676)	-44	NM_016676	19325	Mm.378993	NM_016676	ENSMUSG00000020671	Rab10	AW107754	RAB10, member RAS oncogene family	protein-coding
chr6	104064632	104065408	Intergenic	L1Md_T|LINE|L1	-100336	NR_144494	100846987		NR_144494		Pou5f1-rs5	Gm21054|Oct4P5|Otf3-rs5|Otf3e	POU domain, class 5, transcription factor 1, related sequence 5	pseudo
chr6	108828190	108828899	promoter-TSS (NM_138677)	promoter-TSS (NM_138677)	-97	NM_138677	192193	Mm.21596	NM_138677	ENSMUSG00000030104	Edem1	A130059K23Rik|EDEM|mKIAA0212	ER degradation enhancer, mannosidase alpha-like 1	protein-coding
chr19	45782654	45783897	non-coding (NR_151594, exon 1 of 15)	non-coding (NR_151594, exon 1 of 15)	278	NM_023799	76055	Mm.122725	NM_023799	ENSMUSG00000025220	Oga	Hy5|Mgea5|Ncoat	O-GlcNAcase	protein-coding
chr12	23799954	23801238	Intergenic	CpG	296673	NM_001256489	66808	Mm.379124	NM_001256489	ENSMUSG00000073158	9030624G23Rik	-	RIKEN cDNA 9030624G23 gene	protein-coding
chr2	38286645	38287470	intron (NM_001362973, intron 1 of 22)	CpG	327	NM_001362977	227801	Mm.314245	NM_146122	ENSMUSG00000035392	Dennd1a	6030446I19Rik|connecdenn	DENN/MADD domain containing 1A	protein-coding
chr14	57912066	57912528	Intergenic	CT-rich|Low_complexity|Low_complexity	-21961	NM_001360098	75965	Mm.29044	NM_029492	ENSMUSG00000021969	Zdhhc20	4930542A17Rik|5033406L14Rik|AI448102|B230110O18Rik|HK11	zinc finger, DHHC domain containing 20	protein-coding
chr2	144010824	144011632	promoter-TSS (NM_133626)	promoter-TSS (NM_133626)	35	NM_024281	81910	Mm.13705	NM_024281	ENSMUSG00000027422	Rrbp1	1700087N07Rik|5730465C04Rik|ES/130|mKIAA1398|mRRp0|mRRp1.8|mRRp10|mRRp15a|mRRp15b|mRRp16.8|mRRp2|mRRp41|mRRp47|mRRp5.4|p180	ribosome binding protein 1	protein-coding
chr18	22985122	22985685	intron (NM_001361224, intron 1 of 10)	intron (NM_001361224, intron 1 of 10)	53260	NM_001161483	319211	Mm.209896	NM_199024	ENSMUSG00000041923	Nol4	1700013J13Rik|4930568N03Rik|Gm1262	nucleolar protein 4	protein-coding
chr2	169857193	169857528	intron (NM_080455, intron 1 of 1)	ORR1A1|LTR|ERVL-MaLR	105827	NR_131974	446211	Mm.266854	NR_131974	ENSMUSG00000103935	AY702102	STDP1	cDNA sequence AY702102	ncRNA
chr5	135359232	135359657	intron (NM_001346745, intron 2 of 5)	ZP3AR|Satellite|Satellite	6149	NM_178240	215061	Mm.261834	NM_178240	ENSMUSG00000053388	Trim50	-	tripartite motif-containing 50	protein-coding
chr4	151995951	151996621	promoter-TSS (NM_172705)	promoter-TSS (NM_172705)	-107	NM_172705	230936	Mm.25582	NM_172705	ENSMUSG00000047777	Phf13	BC029632|Phf5|SPOC1	PHD finger protein 13	protein-coding
chr17	12016613	12019164	intron (NM_016694, intron 10 of 11)	L1Md_A|LINE|L1	-101396	NM_026644	68262	Mm.258300	NM_026644	ENSMUSG00000023827	Agpat4	1500003P24Rik	1-acylglycerol-3-phosphate O-acyltransferase 4 (lysophosphatidic acid acyltransferase, delta)	protein-coding
chr5	145280382	145281009	Intergenic	CpG	-2648	NM_001081431	666311	Mm.260773	NM_001081431	ENSMUSG00000070420	Zscan25	EG666311|Zfp498	zinc finger and SCAN domain containing 25	protein-coding
chr18	29194747	29195570	Intergenic	L1Md_T|LINE|L1	-247042	NR_045395	78199	Mm.243850	NR_045395	ENSMUSG00000117554	4930527G23Rik	-	RIKEN cDNA 4930527G23 gene	ncRNA
chr4	108328030	108328480	exon (NM_027250, exon 1 of 3)	exon (NM_027250, exon 1 of 3)	103	NM_027250	69893	Mm.28354	NM_027250	ENSMUSG00000048351	Coa7	2010305A19Rik|AI451324|D4Ertd796e|Selrc1	cytochrome c oxidase assembly factor 7	protein-coding
chr16	14159016	14159799	promoter-TSS (NM_001081154)	promoter-TSS (NM_001081154)	-133	NM_001081154	223989	Mm.85442	NM_001081154	ENSMUSG00000060657	Marf1	4921513D23Rik|BC031575|C87306|E030019O05|Lkap|mKIAA0430	meiosis regulator and mRNA stability 1	protein-coding
chr6	100757087	100758172	intron (NM_198612, intron 3 of 6)	L1Md_T|LINE|L1	52895	NM_198612	232313	Mm.272037	NM_198612	ENSMUSG00000030074	Gxylt2	Glt8d4|Gm152	glucoside xylosyltransferase 2	protein-coding
chr7	19307853	19308851	intron (NM_008036, intron 1 of 3)	intron (NM_008036, intron 1 of 3)	1693	NM_008036	14282	Mm.248335	NM_008036	ENSMUSG00000003545	Fosb	-	FBJ osteosarcoma oncogene B	protein-coding
chr12	105032229	105032856	promoter-TSS (NM_028419)	promoter-TSS (NM_028419)	-76	NM_028419	73046	Mm.29128	NM_028419	ENSMUSG00000021102	Glrx5	-	glutaredoxin 5	protein-coding
chr18	84851132	84851505	promoter-TSS (NM_025797)	promoter-TSS (NM_025797)	-20	NM_025797	109672	Mm.31018	NM_025797	ENSMUSG00000024646	Cyb5a	0610009N12Rik|Cyb5	cytochrome b5 type A (microsomal)	protein-coding
chr11	75630661	75631193	promoter-TSS (NM_008916)	promoter-TSS (NM_008916)	-93	NM_008916	19062	Mm.1458	NM_008916	ENSMUSG00000006127	Inpp5k	C62|Pps|SKIP	inositol polyphosphate 5-phosphatase K	protein-coding
chr1	92934330	92934974	non-coding (NR_015525, exon 2 of 2)	non-coding (NR_015525, exon 2 of 2)	244	NM_011796	23830	Mm.294315	NM_011796	ENSMUSG00000026270	Capn10	AW049679|Capn8|mKIAA1845	calpain 10	protein-coding
chr4	129640627	129641139	promoter-TSS (NM_001005506)	promoter-TSS (NM_001005506)	-78	NM_001005506	109658	Mm.268863	NM_001005506	ENSMUSG00000053841	Txlna	2600010N21Rik|AI425952|AW209241|Il14|Txln	taxilin alpha	protein-coding
chr9	38839673	38840638	Intergenic	L1Md_T|LINE|L1	-7961	NM_207560	404322	Mm.355016	NM_207560	ENSMUSG00000062103	Olfr924	MOR171-27P|MOR171-47|Olfr1520-ps1	olfactory receptor 924	protein-coding
chr12	110446307	110447176	promoter-TSS (NM_001135001)	promoter-TSS (NM_001135001)	-483	NM_001135001	26931	Mm.240396	NM_012023	ENSMUSG00000017843	Ppp2r5c	2610043M05Rik|2700063L20Rik|AI060890|AW545884|C85228|D12Bwg0916e	protein phosphatase 2, regulatory subunit B', gamma	protein-coding
chr15	3995456	3996271	promoter-TSS (NR_045740)	promoter-TSS (NR_045740)	-117	NM_145930	106064	Mm.21299	NM_145930	ENSMUSG00000041935	AW549877	AI195826	expressed sequence AW549877	protein-coding
chr11	120466958	120467875	promoter-TSS (NM_008244)	promoter-TSS (NM_008244)	184	NM_197995	70317	Mm.485046	NM_197995	ENSMUSG00000057594	Arl16	2600005N12Rik	ADP-ribosylation factor-like 16	protein-coding
chr16	91728345	91729818	promoter-TSS (NM_001110276)	promoter-TSS (NM_001110276)	-279	NM_133679	66609	Mm.109823	NM_026994	ENSMUSG00000058240	Cryzl1	2210407J23Rik|2410006O11Rik|QOH-1	crystallin, zeta (quinone reductase)-like 1	protein-coding
chr3	84813959	84814861	Intergenic	CpG	-1167	NM_001177773	50754	Mm.196475	NM_080428	ENSMUSG00000028086	Fbxw7	1110001A17Rik|AGO|Cdc4|Fbw7|Fbwd6|Fbx30|Fbxo30|Fbxw6|SEL-10	F-box and WD-40 domain protein 7	protein-coding
chr9	71195580	71196698	intron (NR_110517, intron 5 of 5)	L1Md_T|LINE|L1	19102	NR_110519	100041660	Mm.487231	NR_110518		Gm3458	-	predicted gene 3458	ncRNA
chr5	76950827	76951998	5' UTR (NM_001356971, exon 1 of 10)	5' UTR (NM_001356971, exon 1 of 10)	110	NM_001356971	67054	Mm.182931	NM_025939	ENSMUSG00000029247	Paics	2610511I09Rik|ADE2H1|AIRC|PAIS	phosphoribosylaminoimidazole carboxylase, phosphoribosylaminoribosylaminoimidazole, succinocarboxamide synthetase	protein-coding
chr14	6545805	6546888	Intergenic	Intergenic	210711	NM_001309401	100041151	Mm.396155	NM_001309401	ENSMUSG00000091754	Gm3636	100042043	predicted gene 3636	protein-coding
chr14	49783078	49783540	promoter-TSS (NM_026142)	promoter-TSS (NM_026142)	74	NM_001358244	67419	Mm.318710	NM_026142	ENSMUSG00000036242	Armh4	3632451O06Rik|AU067705	armadillo-like helical domain containing 4	protein-coding
chr5	124095531	124096200	promoter-TSS (NM_019875)	promoter-TSS (NM_019875)	-67	NM_019875	56325	Mm.254839	NM_019875	ENSMUSG00000029408	Abcb9	TAPL|mKIAA1520	ATP-binding cassette, sub-family B (MDR/TAP), member 9	protein-coding
chr12	23188470	23190270	Intergenic	CpG	-179127	NR_015504	69732	Mm.391403	NM_028362	ENSMUSG00000073164	2410018L13Rik	2810480C08Rik	RIKEN cDNA 2410018L13 gene	ncRNA
chr13	49341276	49341700	promoter-TSS (NM_001039180)	promoter-TSS (NM_001039180)	-61	NM_029791	76895	Mm.197387	NM_029791	ENSMUSG00000037933	Bicd2	-	BICD cargo adaptor 2	protein-coding
chr7	13023964	13025306	5' UTR (NM_011588, exon 1 of 17)	5' UTR (NM_011588, exon 1 of 17)	483	NM_011588	21849	Mm.15701	NM_011588	ENSMUSG00000005566	Trim28	AA408787|KAP-1|KRIP-1|MommeD9|Tif1b|Tif1beta	tripartite motif-containing 28	protein-coding
chr18	35771270	35772126	5' UTR (NM_019912, exon 1 of 7)	5' UTR (NM_019912, exon 1 of 7)	139	NM_019912	56550	Mm.180052	NM_019912	ENSMUSG00000091896	Ube2d2a	1500034D03Rik|Ubc2e|Ube2d2|ubc4	ubiquitin-conjugating enzyme E2D 2A	protein-coding
chr6	54992783	54993349	promoter-TSS (NM_026637)	promoter-TSS (NM_026637)	-199	NM_026637	110175	Mm.294708	NM_026637	ENSMUSG00000002797	Ggct	A030007L17Rik|AA673177|Gctg|Ggc	gamma-glutamyl cyclotransferase	protein-coding
chr11	120572567	120573521	5' UTR (NM_011032, exon 1 of 11)	5' UTR (NM_011032, exon 1 of 11)	209	NM_011032	18453	Mm.16660	NM_011032	ENSMUSG00000025130	P4hb	ERp59|PDI|Pdia1|Thbp	prolyl 4-hydroxylase, beta polypeptide	protein-coding
chr2	92884013	92884317	Intergenic	Intergenic	-30936	NM_030725	80976	Mm.33490	NM_030725	ENSMUSG00000027220	Syt13	5730409J20Rik|AI549909|mKIAA1427	synaptotagmin XIII	protein-coding
chr1	4857485	4858346	promoter-TSS (NM_001159751)	promoter-TSS (NM_001159751)	221	NM_001159750	21399	Mm.207263	NM_011541	ENSMUSG00000033813	Tcea1	S-II	transcription elongation factor A (SII) 1	protein-coding
chr6	17840318	17840933	intron (NM_001083315, intron 3 of 14)	CpG	91455	NM_022332	64213	Mm.12051	NM_022332	ENSMUSG00000029534	St7	9430001H04Rik|Fam4a2|HELG|RAY1|SEN4|TSG7	suppression of tumorigenicity 7	protein-coding
chr4	10693856	10694768	intron (NR_045185, intron 4 of 4)	(CCTG)n|Simple_repeat|Simple_repeat	103490	NR_045185	73624	Mm.67392	NR_045185	ENSMUSG00000086080	1700123O12Rik	-	RIKEN cDNA 1700123O12 gene	ncRNA
chr11	48464480	48464790	Intergenic	Intergenic	-335725	NM_008143	14694	Mm.5305	NM_008143	ENSMUSG00000020372	Rack1	AL033335|GB-like|Gnb2-rs1|Gnb2l1|p205	receptor for activated C kinase 1	protein-coding
chr19	54009128	54009787	intron (NM_001355242, intron 4 of 9)	intron (NM_001355242, intron 4 of 9)	-35802	NM_007417	11551	Mm.235195	NM_007417	ENSMUSG00000033717	Adra2a	AW122659|Adra-2|Adra-2a|alpha(2A)AR|alpha2-C10|alpha2A|alpha2A-AR	adrenergic receptor, alpha 2a	protein-coding
chr4	132922363	132922931	promoter-TSS (NM_001163792)	promoter-TSS (NM_001163792)	-96	NM_145553	230789	Mm.11473	NM_145553	ENSMUSG00000028878	Fam76a	-	family with sequence similarity 76, member A	protein-coding
chr4	141060384	141061109	promoter-TSS (NM_001145958)	promoter-TSS (NM_001145958)	-201	NM_001145958	230872	Mm.80685	NM_172122	ENSMUSG00000040860	Crocc	-	ciliary rootlet coiled-coil, rootletin	protein-coding
chr8	65710352	65711739	intron (NM_175188, intron 1 of 7)	L1Md_T|LINE|L1	92520	NM_175188	72925	Mm.380457	NM_175188	ENSMUSG00000036469	2025-03-01	2900024D24Rik|BB085186	membrane-associated ring finger (C3HC4) 1	protein-coding
chr1	93114953	93115664	Intergenic	Intergenic	-13434	NM_008440	16560	Mm.276408	NM_008440	ENSMUSG00000014602	Kif1a	ATSV|C630002N23Rik|Gm1626|Kns1	kinesin family member 1A	protein-coding
chr9	3199099	3200224	non-coding (NR_027988, exon 1 of 5)	non-coding (NR_027988, exon 1 of 5)	152	NR_027988	114673	Mm.422774	NM_053265	ENSMUSG00000042360	4930433N12Rik	-	RIKEN cDNA 4930433N12 gene	ncRNA
chr10	40141916	40142482	promoter-TSS (NM_028247)	promoter-TSS (NM_028247)	55	NM_001114332	72472	Mm.186778	NM_028247	ENSMUSG00000019838	Slc16a10	2610103N14Rik|9830169E08|Mct10|PRO0813|TAT1	solute carrier family 16 (monocarboxylic acid transporters), member 10	protein-coding
chr5	8367896	8368458	promoter-TSS (NM_001098225)	promoter-TSS (NM_001098225)	-17	NM_001310440	11496	Mm.275895	NM_001007220	ENSMUSG00000040537	Adam22	2900022I03Rik|AI854032|MDC2	a disintegrin and metallopeptidase domain 22	protein-coding
chr18	42511140	42512110	intron (NM_001360881, intron 1 of 20)	CpG	138	NM_001289526	56070	Mm.270511	NM_001039474	ENSMUSG00000024498	Tcerg1	2410022J09Rik|2900090C16Rik|AI428505|CA150b|FBP23|FBP28|Taf2s|ca150|p144	transcription elongation regulator 1 (CA150)	protein-coding
chr11	5061489	5063566	intron (NM_144560, intron 4 of 6)	intron (NM_144560, intron 4 of 6)	2800	NM_030228	78926	Mm.44591	NM_030228	ENSMUSG00000034201	Gas2l1	4930500E24Rik|D0Jmb1|Gar22|TU-71.1	growth arrest-specific 2 like 1	protein-coding
chr1	136131207	136131515	promoter-TSS (NR_046168)	promoter-TSS (NR_046168)	-29	NR_153829	16565	Mm.276135	NM_019962	ENSMUSG00000041642	Kif21b	2610511N21Rik|mKIAA0449	kinesin family member 21B	protein-coding
chr10	71237740	71238246	promoter-TSS (NM_009360)	promoter-TSS (NM_009360)	51	NM_009360	21780	Mm.229292	NM_009360	ENSMUSG00000003923	Tfam	AI661103|Hmgts|mtTFA|tsHMG	transcription factor A, mitochondrial	protein-coding
chr3	153173598	153173929	Intergenic	GA-rich|Low_complexity|Low_complexity	-21655	NR_108044	75001		NR_108044		4930482G09Rik	-	RIKEN cDNA 4930482G09 gene	ncRNA
chr1	133609979	133610691	promoter-TSS (NM_009227)	promoter-TSS (NM_009227)	-55	NM_009227	20643	Mm.249110	NM_009227	ENSMUSG00000090553	Snrpe	AL022645|C76690|SME	small nuclear ribonucleoprotein E	protein-coding
chr12	69158861	69159559	promoter-TSS (NM_009093)	promoter-TSS (NM_009093)	-24	NM_009093	20090	Mm.379006	NM_009093	ENSMUSG00000034892	Rps29	-	ribosomal protein S29	protein-coding
chrX	164980302	164980651	promoter-TSS (NM_001146081)	promoter-TSS (NM_001146081)	-101	NM_001290523	76763	Mm.291758	NM_029730	ENSMUSG00000061778	Mospd2	2410013I23Rik	motile sperm domain containing 2	protein-coding
chr17	56626843	56627357	promoter-TSS (NM_001357897)	promoter-TSS (NM_001357897)	53	NM_001357897	106757	Mm.23401	NM_175350	ENSMUSG00000040828	Catsperd	4921529N20Rik|4933402B14Rik|619718|AW045609|Gm6095|Tmem146	cation channel sperm associated auxiliary subunit delta	protein-coding
chr10	41809670	41810556	promoter-TSS (NM_001243075)	promoter-TSS (NM_001243075)	-245	NM_026643	103268	Mm.338605	NM_026643	ENSMUSG00000019813	Cep57l1	2410017P07Rik|4930484D11Rik|AI607327|cep57R	centrosomal protein 57-like 1	protein-coding
chr7	44970203	44970633	exon (NM_001252470, exon 6 of 19)	exon (NM_001252470, exon 6 of 19)	4433	NM_001357670	78070	Mm.231465	NM_153679	ENSMUSG00000007783	Cpt1c	6530437J22Rik|9630004I06Rik|CPT I-C|CPT IC|CPT1-B|CPTI-B	carnitine palmitoyltransferase 1c	protein-coding
chr10	100486883	100487721	promoter-TSS (NM_001110013)	promoter-TSS (NM_001110013)	45	NM_001110013	237500	Mm.296805	NM_001033332	ENSMUSG00000036676	Tmtc3	9130014E20Rik|B130008E12Rik|mSmile	transmembrane and tetratricopeptide repeat containing 3	protein-coding
chr7	89403771	89404714	promoter-TSS (NM_001360746)	promoter-TSS (NM_001360746)	-20	NM_001360746	72759	Mm.208477	NM_028343	ENSMUSG00000039428	Tmem135	2810439K08Rik|AW319712|PMP52	transmembrane protein 135	protein-coding
chr13	74317156	74317591	promoter-TSS (NM_001359996)	promoter-TSS (NM_001359996)	-47	NM_011051	18570	Mm.24254	NM_011051	ENSMUSG00000021576	Pdcd6	AV299538|Alg2|MA-3|PS2|alg-2	programmed cell death 6	protein-coding
chr9	118040118	118040688	promoter-TSS (NM_001286508)	promoter-TSS (NM_001286508)	-119	NM_001286508	27215	Mm.92705	NM_013727	ENSMUSG00000039285	Azi2	AA410145|AZ2	5-azacytidine induced gene 2	protein-coding
chr11	86993584	86994042	promoter-TSS (NM_001005341)	promoter-TSS (NM_001005341)	-51	NM_001005341	77864	Mm.191894	NM_001005341	ENSMUSG00000018427	Ypel2	6430570G24|E130113K08Rik	yippee like 2	protein-coding
chr8	93583305	93584295	Intergenic	L1Md_T|LINE|L1	-47960	NM_001003951	67935	Mm.65457	NM_001003951	ENSMUSG00000058019	Ces5a	1700081L16Rik|1700122C07Rik|BB081581|Ces7|Gm503|cauxin	carboxylesterase 5A	protein-coding
chr16	17891193	17891930	5' UTR (NM_010048, exon 1 of 10)	5' UTR (NM_010048, exon 1 of 10)	167	NM_010048	13356	Mm.254515	NM_010048	ENSMUSG00000003166	Dgcr2	9930034O06Rik|DGS-C|Dgsc|Idd|Lan|Sez12|mKIAA0163	DiGeorge syndrome critical region gene 2	protein-coding
chr1	160194924	160195475	promoter-TSS (NM_001347121)	promoter-TSS (NM_001347121)	-16	NM_025474	64659	Mm.29599	NM_025474	ENSMUSG00000058267	Mrps14	1810032L21Rik|AL022847|Rpms14	mitochondrial ribosomal protein S14	protein-coding
chr14	63177748	63178351	promoter-TSS (NM_001360211)	promoter-TSS (NM_001360211)	-162	NM_001360211	14137	Mm.474432	NM_010191	ENSMUSG00000021273	Fdft1	SQS|SS	farnesyl diphosphate farnesyl transferase 1	protein-coding
chr4	40596474	40597926	Intergenic	L1Md_T|LINE|L1	-71652	NR_040644	71293	Mm.399556	NR_040644	ENSMUSG00000086355	4933428C19Rik	-	RIKEN cDNA 4933428C19 gene	ncRNA
chr8	3912997	3914538	Intergenic	L1Md_T|LINE|L1	13074	NM_026972	69165	Mm.175163	NM_026972	ENSMUSG00000065987	Cd209b	1810030I22Rik|DC-SIGNR1|OtB7|SIGNR1|mSIGNR1	CD209b antigen	protein-coding
chr1	52399973	52400967	Intergenic	L1Md_T|LINE|L1	99978	NM_008667	17936	Mm.25903	NM_008667	ENSMUSG00000002881	Nab1	-	Ngfi-A binding protein 1	protein-coding
chr5	21701086	21701904	promoter-TSS (NM_001359963)	promoter-TSS (NM_001359963)	-99	NM_001359963	242864	Mm.153292	NM_178728	ENSMUSG00000044968	Napepld	A530089G06|Mbldc1|NAPE-PLD	N-acyl phosphatidylethanolamine phospholipase D	protein-coding
chr16	94370362	94371872	promoter-TSS (NM_001159620)	promoter-TSS (NM_001159620)	-102	NM_001159617	56176	Mm.474449	NM_019543	ENSMUSG00000022940	Pigp	Dcrc|Dscr5	phosphatidylinositol glycan anchor biosynthesis, class P	protein-coding
chr11	3170074	3178505	intron (NM_001363224, intron 8 of 28)	L1M5|LINE|L1	19314	NM_030207	78887	Mm.394071	NM_030207	ENSMUSG00000023764	Sfi1	-	Sfi1 homolog, spindle assembly associated (yeast)	protein-coding
chr17	27565359	27565906	promoter-TSS (NM_001002895)	promoter-TSS (NM_001002895)	95	NM_001002895	106672	Mm.61488	NM_001002895	ENSMUSG00000062753	AI413582	AI854251|Smim29	expressed sequence AI413582	protein-coding
chr3	144569847	144570957	promoter-TSS (NM_053102)	promoter-TSS (NM_053102)	-25	NM_053102	93684	Mm.29812	NM_053102	ENSMUSG00000037072	Selenof	9430015P09Rik|Sep15	selenoprotein F	protein-coding
chr1	186730411	186732819	intron (NM_026041, intron 4 of 4)	intron (NM_026041, intron 4 of 4)	17743	NM_026041	67223	Mm.289841	NM_026041	ENSMUSG00000001305	Rrp15	2810430M08Rik|5430437H21Rik	ribosomal RNA processing 15 homolog (S. cerevisiae)	protein-coding
chr6	67006672	67009311	intron (NM_001177560, intron 3 of 4)	L1Md_A|LINE|L1	-28608	NR_040278	320172	Mm.449039	NR_040278	ENSMUSG00000087231	E230016M11Rik	-	RIKEN cDNA E230016M11 gene	ncRNA
chr6	108065017	108065609	intron (NM_178391, intron 1 of 1)	intron (NM_178391, intron 1 of 1)	268	NM_178391	74729	Mm.56539	NM_178391	ENSMUSG00000034639	Setmar	5830404F24Rik|Etet2	SET domain without mariner transposase fusion	protein-coding
chr2	31688090	31688759	promoter-TSS (NM_001112703)	promoter-TSS (NM_001112703)	45	NR_153862	108168742	Mm.416860	NR_153862		Gm13427	-	predicted gene 13427	ncRNA
chr17	3114702	3115776	5' UTR (NM_134123, exon 1 of 20)	5' UTR (NM_134123, exon 1 of 20)	267	NM_134123	106583	Mm.124373	NM_134123	ENSMUSG00000046201	Scaf8	A630086M08Rik|A930036P18Rik|AA408306|AI447644|AI448652|AU015035|Rbm16|mKIAA1116	SR-related CTD-associated factor 8	protein-coding
chr3	65527761	65529062	promoter-TSS (NM_178892)	promoter-TSS (NM_178892)	-36	NM_178892	99929	Mm.246398	NM_178892	ENSMUSG00000034640	Tiparp	ARTD14|AW558171|PARP7	TCDD-inducible poly(ADP-ribose) polymerase	protein-coding
chr10	115435484	115436134	Intergenic	IMPB_01|Satellite|Satellite	50850	NM_001033261	216345	Mm.207621	NM_001033261	ENSMUSG00000034163	Zfc3h1	BC033596|Ccdc131|Psrc2	zinc finger, C3H1-type containing	protein-coding
chr13	104109212	104110162	promoter-TSS (NM_029447)	promoter-TSS (NM_029447)	-54	NM_001361054	218544	Mm.44416	NM_144838	ENSMUSG00000042743	Sgtb	C630001O05Rik	small glutamine-rich tetratricopeptide repeat (TPR)-containing, beta	protein-coding
chr11	55097700	55098113	promoter-TSS (NM_010299)	promoter-TSS (NM_010299)	-79	NM_010299	14667	Mm.287807	NM_010299	ENSMUSG00000000594	Gm2a	AA408702|AW215435|GM2-AP|SAP-3	GM2 ganglioside activator protein	protein-coding
chr7	109703393	109704163	promoter-TSS (NM_020616)	promoter-TSS (NM_020616)	100	NM_020616	57373	Mm.334138	NM_020616	ENSMUSG00000031023	Akip1	BCA3|C11orf17|D7H11orf17|D930014E17Rik|ICRFP703B1614Q5.6|ORF27	A kinase (PRKA) interacting protein 1	protein-coding
chr6	71493570	71494594	5' UTR (NM_001308303, exon 1 of 4)	5' UTR (NM_001308303, exon 1 of 4)	205	NM_009543	22644	Mm.422969	NM_009543	ENSMUSG00000052656	Rnf103	AW146237|AW212918|Zfp103|kf-1	ring finger protein 103	protein-coding
chr19	46152227	46152762	promoter-TSS (NM_178930)	promoter-TSS (NM_178930)	-64	NM_178930	107338	Mm.271620	NM_178930	ENSMUSG00000025224	Gbf1	1700083E03Rik|AI035702|AW049900|mKIAA0248	golgi-specific brefeldin A-resistance factor 1	protein-coding
chr10	53629533	53630269	promoter-TSS (NM_027830)	promoter-TSS (NM_027830)	56	NM_027830	71567	Mm.278221	NM_027830	ENSMUSG00000058298	Mcm9	9030408O17Rik|Gm235|Mcmdc1	minichromosome maintenance 9 homologous recombination repair factor	protein-coding
chr5	132766352	132766617	Intergenic	ZP3AR|Satellite|Satellite	-223264	NM_001363480	319974	Mm.409595	NM_177047	ENSMUSG00000029673	Auts2	2700063G02Rik|A730011F23Rik|D830032G16Rik	autism susceptibility candidate 2	protein-coding
chr5	99978792	99979459	promoter-TSS (NM_001077265)	promoter-TSS (NM_001077265)	-187	NM_001077265	11991	Mm.150231	NM_007516	ENSMUSG00000000568	Hnrnpd	Auf1|Hnrpd	heterogeneous nuclear ribonucleoprotein D	protein-coding
chr11	90249162	90250044	5' UTR (NM_026178, exon 1 of 7)	5' UTR (NM_026178, exon 1 of 7)	127	NM_026178	67468	Mm.277518	NM_026178	ENSMUSG00000003948	Mmd	1200017E07Rik|1810073C06Rik|AA690185	monocyte to macrophage differentiation-associated	protein-coding
chr9	109309631	109310797	Intergenic	L1Md_T|LINE|L1	-22538	NM_015793	50757	Mm.296059	NM_015793	ENSMUSG00000105589	Fbxw14	AU045528|E330009N23Rik|Fbx12|Fbxo12	F-box and WD-40 domain protein 14	protein-coding
chr7	56049920	56050479	promoter-TSS (NM_010418)	promoter-TSS (NM_010418)	44	NM_010418	15204	Mm.20929	NM_010418	ENSMUSG00000030451	Herc2	D15F32S1h|D7H15F32S1|D7H15F37S1|jdf2|mKIAA0393|rjs	HECT and RLD domain containing E3 ubiquitin protein ligase 2	protein-coding
chr7	86118719	86119697	Intergenic	L1Md_T|LINE|L1	52516	NM_001102578	546981	Mm.469835	NM_001102578	ENSMUSG00000090436	Vmn2r75	EG546981	vomeronasal 2, receptor 75	protein-coding
chr7	135396054	135396380	Intergenic	Intergenic	-14150	NM_183193	270004	Mm.132547	NM_183193	ENSMUSG00000048377	Foxi2	B130055A05Rik	forkhead box I2	protein-coding
chr7	39517582	39518084	promoter-TSS (NM_001004139)	promoter-TSS (NM_001004139)	67	NM_001004139	70227	Mm.333800	NM_001004139	ENSMUSG00000068959	Zfp619	3000002G13Rik	zinc finger protein 619	protein-coding
chr18	56925414	56925916	promoter-TSS (NM_177115)	promoter-TSS (NM_177115)	-117	NM_177115	320253	Mm.312623	NM_177115	ENSMUSG00000032656	2025-03-03	6330411I15Rik|A530081L18Rik|AI843639|MARCH-III	membrane-associated ring finger (C3HC4) 3	protein-coding
chr6	124919677	124920248	intron (NR_152158, intron 1 of 1)	intron (NR_152158, intron 1 of 1)	-2016	NM_026988	69202	Mm.142187	NM_026988	ENSMUSG00000030122	Ptms	2610009E16Rik	parathymosin	protein-coding
chr8	20701930	20706590	Intergenic	Intergenic	89333	NM_001270553	100861668	Mm.491087	NM_001270553	ENSMUSG00000095294	Gm21119	-	predicted gene, 21119	protein-coding
chrY	90793159	90794780	intron (NM_133362, intron 2 of 3)	B1_Mus2|SINE|Alu	8527	NR_137282	170942	Mm.76062	NM_133362	ENSMUSG00000096768	Erdr1	edr	erythroid differentiation regulator 1	protein-coding
chr16	57121258	57121881	promoter-TSS (NM_138599)	promoter-TSS (NM_138599)	-145	NM_138599	28185	Mm.196933	NM_138599	ENSMUSG00000022752	Tomm70a	2610044B22Rik|D16Ium22|D16Ium22e|D16Wsu109e|Tom70|Tomm70|mKIAA0719	translocase of outer mitochondrial membrane 70A	protein-coding
chr8	72492408	72493108	promoter-TSS (NM_177766)	promoter-TSS (NM_177766)	-144	NM_177766	270066	Mm.291461	NM_177766	ENSMUSG00000019731	Slc35e1	6030458H05|AA408278	solute carrier family 35, member E1	protein-coding
chr2	24934956	24935695	promoter-TSS (NM_001162485)	promoter-TSS (NM_001162485)	-44	NM_178408	215705	Mm.45275	NM_178408	ENSMUSG00000026972	Arrdc1	AI957342|BC004091	arrestin domain containing 1	protein-coding
chr2	121413462	121414255	promoter-TSS (NM_007952)	promoter-TSS (NM_007952)	-44	NM_007952	14827	Mm.263177	NM_007952	ENSMUSG00000027248	Pdia3	58kDa|ERp57|ERp60|ERp61|Erp|Grp58|PDI|PDI-Q2|PI-PLC|PLC[a]|Plca	protein disulfide isomerase associated 3	protein-coding
chr19	4878417	4879020	promoter-TSS (NM_013456)	promoter-TSS (NM_013456)	28	NM_001168517	70605	Mm.36885	NM_027476	ENSMUSG00000006463	Zdhhc24	5730496N17Rik|Leng4	zinc finger, DHHC domain containing 24	protein-coding
chr5	129786994	129787573	promoter-TSS (NM_133900)	promoter-TSS (NM_133900)	-30	NM_133900	100678	Mm.271784	NM_133900	ENSMUSG00000029446	Psph	AI480570|PSP|PSPase	phosphoserine phosphatase	protein-coding
chr5	135008646	135009868	promoter-TSS (NM_145215)	promoter-TSS (NM_145215)	-42	NM_145215	68758	Mm.389700	NM_145215	ENSMUSG00000040532	Abhd11	1110054D16Rik|A630008N09Rik|Wbscr21	abhydrolase domain containing 11	protein-coding
chr3	51276000	51276778	promoter-TSS (NR_073429)	promoter-TSS (NR_073429)	-372	NR_073429	67746	Mm.441177	NR_073429	ENSMUSG00000087440	4930577N17Rik	-	RIKEN cDNA 4930577N17 gene	ncRNA
chr19	4756190	4756994	promoter-TSS (NM_025717)	promoter-TSS (NM_025717)	67	NM_025717	66704	Mm.396734	NM_025717	ENSMUSG00000033760	Rbm4b	4921506I22Rik|AI504630|AI506404|Lark2|Neosin	RNA binding motif protein 4B	protein-coding
chrX	106186728	106187236	promoter-TSS (NM_008828)	promoter-TSS (NM_008828)	-118	NM_008828	18655	Mm.316355	NM_008828	ENSMUSG00000062070	Pgk1	Pgk-1	phosphoglycerate kinase 1	protein-coding
chrX	148170938	148171377	Intergenic	Intergenic	-9567	NM_001122734	100039934	Mm.474426	NM_001122734	ENSMUSG00000095621	Gm15085	-	predicted gene 15085	protein-coding
chr14	60494237	60494479	Intergenic	C-rich|Low_complexity|Low_complexity	116666	NM_028113	72125	Mm.275499	NM_028113	ENSMUSG00000021986	Amer2	2600011E07Rik|Fam123a	APC membrane recruitment 2	protein-coding
chr8	80739183	80740084	promoter-TSS (NM_053124)	promoter-TSS (NM_053124)	-174	NM_053124	93762	Mm.246803	NM_053124	ENSMUSG00000031715	Smarca5	4933427E24Rik|D030040M08Rik|D330027N15Rik|MommeD4|Snf2h	SWI/SNF related, matrix associated, actin dependent regulator of chromatin, subfamily a, member 5	protein-coding
chr9	51008183	51009341	exon (NM_178710, exon 1 of 16)	exon (NM_178710, exon 1 of 16)	311	NM_178710	235344	Mm.104932	NM_178710	ENSMUSG00000037112	Sik2	G630080D20Rik|Snf1lk2	salt inducible kinase 2	protein-coding
chr19	21652798	21653500	promoter-TSS (NM_025423)	promoter-TSS (NM_025423)	-160	NM_146096	226016	Mm.28796	NM_146096	ENSMUSG00000047368	Abhd17b	5730446C15Rik|Cgi67|Fam108b|Fam108b1	abhydrolase domain containing 17B	protein-coding
chr9	59678832	59680443	TTS (NM_001253883)	TTS (NM_001253883)	23269	NM_011099	18746	Mm.326167	NM_011099	ENSMUSG00000032294	Pkm	AA414905|AL024370|AL024424|Pk-2|Pk-3|Pk3|Pkm2	pyruvate kinase, muscle	protein-coding
chr9	100073917	100074573	Intergenic	L1Md_T|LINE|L1	51945	NR_040763	108970	Mm.390215	NR_040763	ENSMUSG00000101584	4930519F24Rik	-	RIKEN cDNA 4930519F24 gene	ncRNA
chr10	77902414	77903503	promoter-TSS (NM_145152)	promoter-TSS (NM_145152)	-422	NM_145152	237387	Mm.133301	NM_145152	ENSMUSG00000051652	Lrrc3	1300011L04Rik|C21orf102	leucine rich repeat containing 3	protein-coding
chr3	94309966	94310415	promoter-TSS (NM_029431)	promoter-TSS (NM_029431)	58	NM_029431	75778	Mm.45092	NM_029431	ENSMUSG00000028145	Them4	2700077M13Rik|4921507I02Rik	thioesterase superfamily member 4	protein-coding
chr4	145640437	145641231	Intergenic	CpG	-29863	NM_001103158	100041379	Mm.276881	NM_001103158	ENSMUSG00000058186	Zfp980	Gm13242	zinc finger protein 980	protein-coding
chr1	134415045	134415841	promoter-TSS (NM_028320)	promoter-TSS (NM_028320)	65	NM_028320	72674	Mm.259976	NM_028320	ENSMUSG00000026457	Adipor1	2810031L11Rik|ACDCR1|CGI-45|Paqr1	adiponectin receptor 1	protein-coding
chrX	21260912	21261716	Intergenic	L1Md_T|LINE|L1	-39649	NM_001252013	100503481	Mm.272069	NM_001252013		4930453H23Rik	-	RIKEN cDNA 4930453H23 gene	protein-coding
chr2	155517764	155518330	promoter-TSS (NM_019811)	promoter-TSS (NM_019811)	4	NM_019811	60525	Mm.255026	NM_019811	ENSMUSG00000027605	Acss2	1110017C11Rik|ACAS|ACS|Acas1|Acas2|AceCS1|Acs1|aceCS	acyl-CoA synthetase short-chain family member 2	protein-coding
chr17	29490257	29491072	promoter-TSS (NM_008842)	promoter-TSS (NM_008842)	-121	NM_008842	18712	Mm.328931	NM_008842	ENSMUSG00000024014	Pim1	Pim-1	proviral integration site 1	protein-coding
chr5	8422208	8423133	promoter-TSS (NM_001190717)	promoter-TSS (NM_001190717)	46	NM_001190717	27214	Mm.292470	NM_013726	ENSMUSG00000002297	Dbf4	AA545217|Ask	DBF4 zinc finger	protein-coding
chr5	115652759	115653275	non-coding (NR_151600, exon 1 of 4)	non-coding (NR_151600, exon 1 of 4)	569	NR_151601	75665	Mm.233914	NM_001080808	ENSMUSG00000041609	Bicdl1	2210403N09Rik|BICDR-1|Ccdc64	BICD family like cargo adaptor 1	protein-coding
chr16	11134307	11134935	promoter-TSS (NM_029582)	promoter-TSS (NM_029582)	-89	NM_029582	106200	Mm.291015	NM_029582	ENSMUSG00000022498	Txndc11	2810408E11Rik|AI427833|EFP1|Txdc11	thioredoxin domain containing 11	protein-coding
chr15	79328085	79328537	promoter-TSS (NM_016915)	promoter-TSS (NM_016915)	60	NM_001199024	53357	Mm.155620	NM_016915	ENSMUSG00000042632	Pla2g6	BB112799|PNPLA9|iPLA(2)beta|iPLA2|iPLA2beta	phospholipase A2, group VI	protein-coding
chr1	55087425	55088519	promoter-TSS (NM_008303)	promoter-TSS (NM_008303)	-40	NM_010477	15510	Mm.1777	NM_010477	ENSMUSG00000025980	Hspd1	60kDa|CPN60|HSP-60|HSP-65|Hsp60	heat shock protein 1 (chaperonin)	protein-coding
chrX	148654327	148654747	Intergenic	Intergenic	-9067	NM_001114400	434866	Mm.491025	NM_001114400	ENSMUSG00000096834	Gm15127	-	predicted gene 15127	protein-coding
chrY	6191519	6191986	Intergenic	L1Md_F|LINE|L1	976025	NM_001101623	100040160	Mm.482062	NM_001101623	ENSMUSG00000094081	Gm20826	-	predicted gene, 20826	protein-coding
chr3	53233429	53233947	intron (NM_175386, intron 3 of 3)	intron (NM_175386, intron 3 of 3)	192141	NM_175386	108927	Mm.118617	NM_175386	ENSMUSG00000048332	Lhfp	2810489O06Rik|AI194968|Lhfpl6	lipoma HMGIC fusion partner	protein-coding
chr8	95517462	95518329	Intergenic	(CAGAG)n|Simple_repeat|Simple_repeat	-16205	NM_172914	244608	Mm.248902	NM_172914	ENSMUSG00000036598	Ccdc113	4933409I22|BC060957	coiled-coil domain containing 113	protein-coding
chr12	4733985	4734836	intron (NM_029107, intron 3 of 7)	C-rich|Low_complexity|Low_complexity	4029	NM_029107	74855	Mm.269534	NM_029107	ENSMUSG00000079177	Fam228a	4930417G10Rik	family with sequence similarity 228, member A	protein-coding
chr14	103677119	103678104	intron (NM_198014, intron 2 of 6)	intron (NM_198014, intron 2 of 6)	21821	NR_045148	70898	Mm.27548	NR_045148	ENSMUSG00000089707	Slain1os	4921525B02Rik	SLAIN motif family, member 1, opposite strand	ncRNA
chr2	122467615	122468191	promoter-TSS (NR_027919)	promoter-TSS (NR_027919)	-106	NR_027919	81913	Mm.122640	NR_027919		Bambi-ps1	-	BMP and activin membrane-bound inhibitor, pseudogene (Xenopus laevis)	pseudo
chr4	149166414	149166847	promoter-TSS (NM_001356332)	promoter-TSS (NM_001356332)	75	NM_001081274	110208	Mm.252080	NM_025801	ENSMUSG00000028961	Pgd	0610042A05Rik|AU019875|C78335	phosphogluconate dehydrogenase	protein-coding
chr12	19288082	19289025	Intergenic	CpG	774043	NM_001201330	236366	Mm.352227	NM_001033157	ENSMUSG00000073197	5730507C01Rik	-	RIKEN cDNA 5730507C01 gene	protein-coding
chr6	109591526	109592438	Intergenic	L1Md_T|LINE|L1	763341	NM_138677	192193	Mm.21596	NM_138677	ENSMUSG00000030104	Edem1	A130059K23Rik|EDEM|mKIAA0212	ER degradation enhancer, mannosidase alpha-like 1	protein-coding
chr2	50066061	50066952	promoter-TSS (NM_177139)	promoter-TSS (NM_177139)	77	NR_033304	320343	Mm.130607	NM_177139	ENSMUSG00000050447	Lypd6	E130115E03Rik	LY6/PLAUR domain containing 6	protein-coding
chr17	6079390	6080007	promoter-TSS (NM_001111017)	promoter-TSS (NM_001111017)	41	NM_177311	321007	Mm.5548	NM_177311	ENSMUSG00000015659	Serac1	4930511N22Rik|D17Ertd141e	serine active site containing 1	protein-coding
chr7	127573100	127573723	promoter-TSS (NM_026888)	promoter-TSS (NM_026888)	63	NM_001360741	68961	Mm.274473	NM_026888	ENSMUSG00000030815	Phkg2	1500017I02Rik	phosphorylase kinase, gamma 2 (testis)	protein-coding
chr8	69832268	69832932	promoter-TSS (NM_001357308)	promoter-TSS (NM_001357308)	-24	NR_151668	80720	Mm.210823	NM_001024954	ENSMUSG00000031860	Pbx4	2410015M21Rik|AI429113|AW045266	pre B cell leukemia homeobox 4	protein-coding
chr2	164070708	164071433	promoter-TSS (NM_001291155)	promoter-TSS (NM_001291155)	32	NM_025996	67145	Mm.23173	NM_025996	ENSMUSG00000018322	Tomm34	2610100K07Rik|TOM34	translocase of outer mitochondrial membrane 34	protein-coding
chr4	150236704	150237451	promoter-TSS (NM_023119)	promoter-TSS (NM_023119)	-120	NM_023119	13806	Mm.70666	NM_023119	ENSMUSG00000063524	Eno1	0610008I15|AL022784|Eno-1|MBP-1	enolase 1, alpha non-neuron	protein-coding
chrY	90803212	90805310	intron (NM_133362, intron 2 of 3)	intron (NM_133362, intron 2 of 3)	18819	NR_137282	170942	Mm.76062	NM_133362	ENSMUSG00000096768	Erdr1	edr	erythroid differentiation regulator 1	protein-coding
chr4	109476396	109476986	promoter-TSS (NM_013876)	promoter-TSS (NM_013876)	-186	NM_013876	29864	Mm.392580	NM_013876	ENSMUSG00000028557	Rnf11	-	ring finger protein 11	protein-coding
chr11	4186518	4187259	promoter-TSS (NM_134023)	promoter-TSS (NM_134023)	55	NM_134023	103724	Mm.28140	NM_134023	ENSMUSG00000034412	Tbc1d10a	AI447804|EPI64|Tbc1d10|mFLJ00288	TBC1 domain family, member 10a	protein-coding
chr1	162338529	162339267	intron (NM_001038619, intron 4 of 20)	L1Md_T|LINE|L1	115530	NR_029796	387210		NR_029796	ENSMUSG00000065516	Mir214	Mirn214|mir-214|mmu-mir-214	microRNA 214	ncRNA
chr13	5177649	5178382	Intergenic	L1Md_T|LINE|L1	-568851	NM_018859	56043	Mm.251908	NM_018859	ENSMUSG00000045410	Akr1e1	1810061I10Rik|Akr1e2	aldo-keto reductase family 1, member E1	protein-coding
chr7	114562537	114563143	non-coding (NR_110408, exon 1 of 5)	non-coding (NR_110408, exon 1 of 5)	132	NR_110407	244209	Mm.108037	NM_177382	ENSMUSG00000030670	Cyp2r1	-	cytochrome P450, family 2, subfamily r, polypeptide 1	protein-coding
chr14	20694892	20695725	TTS (NM_001168273)	TTS (NM_001168273)	340	NM_028428	73068	Mm.277552	NM_028428	ENSMUSG00000039357	Fut11	3110009G03Rik|AI317183	fucosyltransferase 11	protein-coding
chr7	48303971	48305082	Intergenic	L1Md_T|LINE|L1	-84000	NM_207539	404240	Mm.357942	NM_207539	ENSMUSG00000050870	Mrgprb8	MrgB8	MAS-related GPR, member B8	protein-coding
chr7	27486808	27487476	intron (NM_018820, intron 1 of 1)	CpG	189	NM_018820	55942	Mm.153684	NM_018820	ENSMUSG00000008384	Sertad1	1110032C13Rik|AV000455|AW456625|Sei-1|Sei1|TRIP-Br1	SERTA domain containing 1	protein-coding
chr19	34527241	34527636	promoter-TSS (NM_021460)	promoter-TSS (NM_021460)	36	NM_001111100	16889	Mm.157545	NM_021460	ENSMUSG00000024781	Lipa	AA960673|Lal|Lip-1|Lip1	lysosomal acid lipase A	protein-coding
chr15	82146775	82147455	promoter-TSS (NM_033218)	promoter-TSS (NM_033218)	-154	NM_033218	20788	Mm.38016	NM_033218	ENSMUSG00000022463	Srebf2	AI608257|SREBP-2|SREBP2|SREBP2gc|bHLHd2|lop13|nuc	sterol regulatory element binding factor 2	protein-coding
chr12	44209403	44210627	promoter-TSS (NM_013760)	promoter-TSS (NM_013760)	53	NM_013760	27362	Mm.27432	NM_013760	ENSMUSG00000014905	Dnajb9	AA408011|AA673251|AA673481|AW556981|ERdj4|Mdg1|mDj7	DnaJ heat shock protein family (Hsp40) member B9	protein-coding
chr11	69632463	69633336	promoter-TSS (NM_011814)	promoter-TSS (NM_011814)	-72	NM_011814	23879	Mm.41930	NM_011814	ENSMUSG00000018765	Fxr2	Fxr2h	fragile X mental retardation, autosomal homolog 2	protein-coding
chr4	122885783	122886551	promoter-TSS (NM_001301067)	promoter-TSS (NM_001301067)	-91	NM_001358035	12331	Mm.8687	NM_007598	ENSMUSG00000028656	Cap1	-	CAP, adenylate cyclase-associated protein 1 (yeast)	protein-coding
chr5	42011634	42013707	Intergenic	L1Md_T|LINE|L1	-55290	NR_131130	433882	Mm.319353	NR_131130	ENSMUSG00000067285	Gm16223	EG433882	predicted gene 16223	ncRNA
chr9	94537281	94538987	promoter-TSS (NM_001033145)	promoter-TSS (NM_001033145)	-53	NM_001033145	68861	Mm.258746	NM_001033145	ENSMUSG00000045414	Dipk2a	1190002N15Rik|GoPro49|HASF	divergent protein kinase domain 2A	protein-coding
chr18	88893750	88894521	promoter-TSS (NM_018821)	promoter-TSS (NM_018821)	72	NM_018821	54607	Mm.91920	NM_018821	ENSMUSG00000056153	Socs6	1500012M23Rik|5830401B18Rik|AI447482|Cis4|Cish4|HSPC060|SOCS-4|SOCS-6|SSI4|STAI4|STATI4|Socs4	suppressor of cytokine signaling 6	protein-coding
chr5	17608588	17609653	intron (NM_013657, intron 2 of 17)	L1Md_T|LINE|L1	34304	NM_013657	20348	Mm.5071	NM_013657	ENSMUSG00000028780	Sema3c	1110036B02Rik|SemE|Semae	sema domain, immunoglobulin domain (Ig), short basic domain, secreted, (semaphorin) 3C	protein-coding
chr17	28080028	28081042	promoter-TSS (NM_013687)	promoter-TSS (NM_013687)	49	NM_001357681	21463	Mm.29758	NM_013687	ENSMUSG00000062859	Tcp11	D17Ken1|Tcp-11	t-complex protein 11	protein-coding
chr12	16894356	16895505	promoter-TSS (NM_009072)	promoter-TSS (NM_009072)	-48	NM_009072	19878	Mm.276024	NM_009072	ENSMUSG00000020580	Rock2	B230113H15Rik|ROKalpha|Rho-kinase|Rock-II|Rock2m|mKIAA0619	Rho-associated coiled-coil containing protein kinase 2	protein-coding
chr13	6778474	6779239	Intergenic	L1Md_T|LINE|L1	-130085	NM_001291071	56421	Mm.273874	NM_019703	ENSMUSG00000021196	Pfkp	1200015H23Rik|9330125N24Rik|ATP-PFK|PFK-C|PFK-P	phosphofructokinase, platelet	protein-coding
chr7	34233723	34234427	Intergenic	CpG	-3739	NM_008155	14751	Mm.589	NM_008155	ENSMUSG00000036427	Gpi1	Amf|Gpi|Gpi-1|Gpi-1r|Gpi-1s|Gpi-1t|Gpi1-r|Gpi1-s|Gpi1-t|Gpi1s|MF|NK|NK/GPI|Nlk|Org|Pgi|Phi	glucose phosphate isomerase 1	protein-coding
chr17	87672241	87673219	exon (NM_008628, exon 1 of 16)	exon (NM_008628, exon 1 of 16)	198	NM_008628	17685	Mm.4619	NM_008628	ENSMUSG00000024151	Msh2	AI788990	mutS homolog 2	protein-coding
chr18	10181365	10182417	promoter-TSS (NM_009071)	promoter-TSS (NM_009071)	-99	NM_009071	19877	Mm.6710	NM_009071	ENSMUSG00000024290	Rock1	1110055K06Rik|Rock-I	Rho-associated coiled-coil containing protein kinase 1	protein-coding
chr16	94675976	94677206	intron (NM_001113389, intron 8 of 11)	intron (NM_001113389, intron 8 of 11)	65172	NM_001347731	13548	Mm.310973	NM_007890	ENSMUSG00000022897	Dyrk1a	2310043O08Rik|D16Ertd272e|D16Ertd493e|Dyrk|Gm10783|Mnbh|Mp86|mmb	dual-specificity tyrosine-(Y)-phosphorylation regulated kinase 1a	protein-coding
chr8	54724185	54724586	promoter-TSS (NM_001172152)	promoter-TSS (NM_001172152)	-17	NM_001364215	244484	Mm.95281	NM_028220	ENSMUSG00000039375	Wdr17	3010002I12Rik|B230207L18Rik	WD repeat domain 17	protein-coding
chr3	61002408	61003344	promoter-TSS (NM_001282016)	promoter-TSS (NM_001282016)	91	NM_001282016	18441	Mm.281452	NM_008772	ENSMUSG00000027765	P2ry1	P2Y1	purinergic receptor P2Y, G-protein coupled 1	protein-coding
chr4	131450385	131450691	Intergenic	Intergenic	387740	NM_001083119	19273	Mm.4860	NM_011214	ENSMUSG00000028909	Ptpru	Ftp-1|PCP-2|PTP|PTP-lambda|PTPlambda|Pcp2|Ptpf|Ptprl|R-PTP-U|R-PTP-psi|RPTPlambda	protein tyrosine phosphatase, receptor type, U	protein-coding
chr14	41424515	41426104	Intergenic	Intergenic	-147902	NM_001358038	666214		NM_001358038		1700049E17Rik1	1700049E17Rik	RIKEN cDNA 1700049E17 gene, gene 1	protein-coding
chr10	96616475	96617304	promoter-TSS (NM_007569)	promoter-TSS (NM_007569)	-112	NM_007569	12226	Mm.23811	NM_007569	ENSMUSG00000036478	Btg1	AI426953|AW546738	B cell translocation gene 1, anti-proliferative	protein-coding
chr13	84222011	84222617	promoter-TSS (NR_029419)	promoter-TSS (NR_029419)	18	NM_001361909	72745	Mm.295063	NM_175187	ENSMUSG00000035762	Tmem161b	2810446P07Rik|AI843389	transmembrane protein 161B	protein-coding
chr1	155416920	155417541	exon (NM_011273, exon 1 of 15)	exon (NM_011273, exon 1 of 15)	214	NM_011273	19775	Mm.266215	NM_011273	ENSMUSG00000026469	Xpr1	Rmc-1|Rmc1|Sxv|Syg1|XR	xenotropic and polytropic retrovirus receptor 1	protein-coding
chr10	71130224	71130550	intron (NM_001347189, intron 1 of 21)	RMER1A|Other|Other	29303	NM_031397	83675	Mm.286834	NM_031397	ENSMUSG00000014329	Bicc1	Bic-C|bpk|jcpk	BicC family RNA binding protein 1	protein-coding
chr2	32727472	32727952	promoter-TSS (NM_001252547)	promoter-TSS (NM_001252547)	23	NM_001252547	27387	Mm.9593	NM_013781	ENSMUSG00000059013	Sh2d3c	Chat|Nsp3|Shep1	SH2 domain containing 3C	protein-coding
chr3	108591124	108592073	promoter-TSS (NM_001358055)	promoter-TSS (NM_001358055)	-135	NM_001358055	99512	Mm.285968	NM_181400	ENSMUSG00000040389	Wdr47	1810073M12Rik|AA552998|mKIAA0893	WD repeat domain 47	protein-coding
chr12	86726058	86726546	promoter-TSS (NR_136890)	promoter-TSS (NR_136890)	-5	NR_136890	102635405		NR_136890		Gm32755	-	predicted gene, 32755	ncRNA
chr5	51201285	51202156	Intergenic	(CCTG)n|Simple_repeat|Simple_repeat	352201	NR_027710	19017	Mm.259072	NM_008904	ENSMUSG00000029167	Ppargc1a	A830037N07Rik|Gm11133|PGC-1|PPARGC-1-alpha|Pgc-1alpha|Pgc1|Pgco1|Ppargc1	peroxisome proliferative activated receptor, gamma, coactivator 1 alpha	protein-coding
chr3	108283743	108284389	promoter-TSS (NM_019972)	promoter-TSS (NM_019972)	2	NM_001271599	20661	Mm.157119	NM_019972	ENSMUSG00000068747	Sort1	2900053A11Rik|AI852375|Ntr3|Ntsr3	sortilin 1	protein-coding
chr7	92787105	92788239	intron (NM_029494, intron 1 of 4)	L1Md_T|LINE|L1	45958	NM_029494	75985	Mm.323004	NM_029494	ENSMUSG00000030643	Rab30	5033421K01Rik|AI323892|Rsb30	RAB30, member RAS oncogene family	protein-coding
chr16	32099454	32100034	promoter-TSS (NM_001111025)	promoter-TSS (NM_001111025)	-17	NM_024464	72084	Mm.37613	NM_024464	ENSMUSG00000023791	Pigx	2010319C14Rik|PIG-X	phosphatidylinositol glycan anchor biosynthesis, class X	protein-coding
chr12	112776508	112784552	Intergenic	Intergenic	19875	NM_178911	104759	Mm.203915	NM_178911	ENSMUSG00000052160	Pld4	AI132321|thss	phospholipase D family, member 4	protein-coding
chr18	70568048	70568538	promoter-TSS (NM_010773)	promoter-TSS (NM_010773)	1	NM_010773	17191	Mm.322	NM_010773	ENSMUSG00000024513	Mbd2	MBD2a	methyl-CpG binding domain protein 2	protein-coding
chr13	81657381	81657961	promoter-TSS (NM_030257)	promoter-TSS (NM_030257)	-135	NM_030257	80289	Mm.259969	NM_030257	ENSMUSG00000035840	Lysmd3	1110030H10Rik|BC003322	LysM, putative peptidoglycan-binding, domain containing 3	protein-coding
chr12	18135379	18136307	Intergenic	CpG	-378667	NM_001033157	236366	Mm.352227	NM_001033157	ENSMUSG00000073197	5730507C01Rik	-	RIKEN cDNA 5730507C01 gene	protein-coding
chrX	151742823	151743886	Intergenic	L1Md_T|LINE|L1	-59928	NM_021523	59026	Mm.27372	NM_021523	ENSMUSG00000025261	Huwe1	5430439H10Rik|AU041296|Arf-bp1|C430014N20Rik|C80292|Gm1718|Ib772|LASU1|Mule|Ureb1	HECT, UBA and WWE domain containing 1	protein-coding
chr4	22357443	22358041	intron (NM_172988, intron 1 of 8)	CpG	199	NM_172988	269514	Mm.40708	NM_172988	ENSMUSG00000040410	Fbxl4	AI836810|FBL4|FBL5	F-box and leucine-rich repeat protein 4	protein-coding
chr3	155093152	155093785	promoter-TSS (NM_029330)	promoter-TSS (NM_029330)	34	NM_028938	74435	Mm.195711	NM_028938	ENSMUSG00000028182	Lrriq3	4930438B07Rik|4930511J15Rik|4933403H06Rik|BB020367|Lrrc44	leucine-rich repeats and IQ motif containing 3	protein-coding
chr7	45704326	45707318	intron (NM_016974, intron 1 of 3)	intron (NM_016974, intron 1 of 3)	575	NM_016974	13170	Mm.24222	NM_016974	ENSMUSG00000059824	Dbp	-	D site albumin promoter binding protein	protein-coding
chr15	66057162	66058319	intron (NM_152923, intron 1 of 14)	L1Md_T|LINE|L1	-80936	NM_001145096	654498	Mm.364550	NM_001145096	ENSMUSG00000072511	Hhla1	F930104E18Rik	HERV-H LTR-associating 1	protein-coding
chr10	87058156	87058760	intron (NM_029685, intron 1 of 5)	CpG	412	NM_029685	76640	Mm.78423	NM_029685	ENSMUSG00000047129	1700113H08Rik	-	RIKEN cDNA 1700113H08 gene	protein-coding
chr9	8467046	8468353	Intergenic	L1Md_T|LINE|L1	-76443	NM_001282087	22068	Mm.325086	NM_013838	ENSMUSG00000031997	Trpc6	AV025995|LLHWJM002|LLHWJM003|LLHWJM004|TRP-6|Trrp6|mtrp6	transient receptor potential cation channel, subfamily C, member 6	protein-coding
chr17	26972839	26973424	promoter-TSS (NM_001005916)	promoter-TSS (NM_001005916)	-48	NM_001005916	474156	Mm.328890	NM_001005916	ENSMUSG00000079605	Zbtb9	3930402F13Rik	zinc finger and BTB domain containing 9	protein-coding
chr8	85432540	85432987	promoter-TSS (NM_025722)	promoter-TSS (NM_025722)	78	NR_033144	66714	Mm.272748	NM_025722	ENSMUSG00000036934	4921524J17Rik	-	RIKEN cDNA 4921524J17 gene	protein-coding
chr11	119942428	119943505	promoter-TSS (NM_130862)	promoter-TSS (NM_130862)	-126	NM_001037754	108100	Mm.197534	NM_130862	ENSMUSG00000025372	Baiap2	IRSp53|R75030	brain-specific angiogenesis inhibitor 1-associated protein 2	protein-coding
chr16	17131974	17132744	promoter-TSS (NM_022324)	promoter-TSS (NM_022324)	24	NM_022324	64136	Mm.30222	NM_022324	ENSMUSG00000022769	Sdf2l1	-	stromal cell-derived factor 2-like 1	protein-coding
chr17	8165053	8165807	promoter-TSS (NM_201230)	promoter-TSS (NM_201230)	-88	NM_001197046	75296	Mm.227250	NM_201230	ENSMUSG00000069135	Fgfr1op	4930553O10Rik|FOP	Fgfr1 oncogene partner	protein-coding
chr8	75033300	75034152	promoter-TSS (NM_001136259)	promoter-TSS (NM_001136259)	40	NM_001136259	21968	Mm.1967	NM_011622	ENSMUSG00000042870	Tom1	-	target of myb1 trafficking protein	protein-coding
chr5	86065214	86066062	promoter-TSS (NM_001345903)	promoter-TSS (NM_001345903)	-55	NM_001345904	12617	Mm.4649	NM_007683	ENSMUSG00000029253	Cenpc1	CENP-C|Cenpc	centromere protein C1	protein-coding
chr7	80802855	80803693	promoter-TSS (NM_016721)	promoter-TSS (NM_016721)	57	NM_016721	29875	Mm.207619	NM_016721	ENSMUSG00000030536	Iqgap1	AA682088|D7Ertd237e|D7Ertd257e|mKIAA0051	IQ motif containing GTPase activating protein 1	protein-coding
chr11	50209989	50211082	intron (NM_001290769, intron 1 of 7)	CpG	285	NM_011018	18412	Mm.40828	NM_011018	ENSMUSG00000015837	Sqstm1	A170|OSF-6|Osi|STAP|STONE14|p62	sequestosome 1	protein-coding
chr16	20425779	20426491	intron (NM_176839, intron 1 of 6)	CpG	259	NM_176839	27416	Mm.20845	NM_013790	ENSMUSG00000022822	Abcc5	2900011L11Rik|AI132311|Abcc5a|Abcc5b|Mrp5	ATP-binding cassette, sub-family C (CFTR/MRP), member 5	protein-coding
chr14	68277212	68278216	Intergenic	L1Md_T|LINE|L1	-152710	NM_008691	18040	Mm.242832	NM_008691	ENSMUSG00000022054	Nefm	NF-M|NF160|NF165|Nef3|Nfm	neurofilament, medium polypeptide	protein-coding
chr11	120713526	120714176	promoter-TSS (NM_153545)	promoter-TSS (NM_153545)	-43	NM_001347612	20892	Mm.259716	NM_016665	ENSMUSG00000025144	Cenpx	Stra13	centromere protein X	protein-coding
chr5	74092741	74093309	promoter-TSS (NR_015531)	promoter-TSS (NR_015531)	-35	NR_145133	70036	Mm.46547	NR_015531	ENSMUSG00000106943	Dancr	2700023E23Rik	differentiation antagonizing non-protein coding RNA	ncRNA
chr3	20057491	20058100	promoter-TSS (NM_001355097)	promoter-TSS (NM_001355097)	-16	NM_001355097	20585	Mm.209650	NM_009210	ENSMUSG00000002428	Hltf	AF010600|BC057116|P113|Smarca3|Snf2l3	helicase-like transcription factor	protein-coding
chr13	64161630	64162188	promoter-TSS (NM_019986)	promoter-TSS (NM_019986)	43	NM_019986	56541	Mm.40989	NM_019986	ENSMUSG00000021476	Habp4	4933413D03Rik|4933428J01Rik	hyaluronic acid binding protein 4	protein-coding
chr6	37441911	37442518	promoter-TSS (NM_178661)	promoter-TSS (NM_178661)	-66	NM_178661	208647	Mm.169929	NM_178661	ENSMUSG00000038648	Creb3l2	BBF2H7|C530025K05Rik|SCIRR69	cAMP responsive element binding protein 3-like 2	protein-coding
chr7	58241306	58242001	Intergenic	L1Md_T|LINE|L1	-416549	NM_009728	11982	Mm.135129	NM_009728	ENSMUSG00000025324	Atp10a	Atp10c|pfatp	ATPase, class V, type 10A	protein-coding
chr9	47529816	47530465	promoter-TSS (NM_207676)	promoter-TSS (NM_207676)	-30	NM_001310841	54725	Mm.234832	NM_018770	ENSMUSG00000032076	Cadm1	2900073G06Rik|3100001I08Rik|AI987920|Bl2|Igsf4|Igsf4a|Necl2|RA175|RA175A|RA175B|RA175C|RA175N|ST17|SgIGSF|SynCam|Tslc1	cell adhesion molecule 1	protein-coding
chr19	5205139	5205512	intron (NM_153129, intron 1 of 23)	(TG)n|Simple_repeat|Simple_repeat	67782	NM_001362451	107975	Mm.234923	NM_153129	ENSMUSG00000024855	Pacs1	AI325977	phosphofurin acidic cluster sorting protein 1	protein-coding
chr3	10116547	10116795	Intergenic	RLTR44A|LTR|ERVK	28394	NR_045710	100041480	Mm.455632	NR_045710	ENSMUSG00000049230	Gm9833	MEF-2|Mef2|MyEF-2|Myef2	myelin basic protein expression factor 2, repressor pseudogene	pseudo
chr17	24885932	24887312	promoter-TSS (NM_027141)	promoter-TSS (NM_027141)	-21	NR_152137	79043	Mm.274794	NM_027141	ENSMUSG00000024160	Spsb3	2310012N15Rik|3300001M01Rik|SSB3|Tce1|mKIAA4204	splA/ryanodine receptor domain and SOCS box containing 3	protein-coding
chr6	8258920	8259773	promoter-TSS (NM_001302354)	promoter-TSS (NM_001302354)	58	NM_001302354	100036521	Mm.446106	NM_001302353	ENSMUSG00000089862	Umad1	Gm16039	UMAP1-MVP12 associated (UMA) domain containing 1	protein-coding
chr2	156007864	156008483	promoter-TSS (NM_001145352)	promoter-TSS (NM_001145352)	145	NM_001356414	66366	Mm.141276	NM_025516	ENSMUSG00000005881	Ergic3	2310015B14Rik|AV318804|CGI-54|D2Ucla1|NY-BR-84|Sdbcag84	ERGIC and golgi 3	protein-coding
chr17	84459469	84464005	intron (NM_183021, intron 2 of 37)	intron (NM_183021, intron 2 of 37)	4471	NM_183021	240174	Mm.246767	NM_177826	ENSMUSG00000024251	Thada	6530405K19|A930021O22|AU019899|BC052885|GITA	thyroid adenoma associated	protein-coding
chr5	115157937	115158933	promoter-TSS (NM_175403)	promoter-TSS (NM_175403)	-259	NM_175403	109154	Mm.153963	NM_175403	ENSMUSG00000048578	Mlec	2410014A08Rik|AI850530|ESTM19|X83352|mKIAA0152	malectin	protein-coding
chr19	44248116	44248779	Intergenic	Intergenic	45159	NM_024450	30049	Mm.480594	NM_024450	ENSMUSG00000025202	Scd3	4930513N16Rik	stearoyl-coenzyme A desaturase 3	protein-coding
chr1	189687955	189688431	promoter-TSS (NM_001081363)	promoter-TSS (NM_001081363)	-107	NM_001081363	108000	Mm.129746	NM_001081363	ENSMUSG00000026605	Cenpf	6530404A22Rik|AI325968|CENF|Lek1|PRO1779|mitosin	centromere protein F	protein-coding
chr14	45318053	45318895	promoter-TSS (NM_015774)	promoter-TSS (NM_015774)	98	NM_015774	50527	Mm.387108	NM_015774	ENSMUSG00000021831	Ero1l	ERO1-L|Ero1a	ERO1-like (S. cerevisiae)	protein-coding
chr3	94412620	94413815	promoter-TSS (NM_028307)	promoter-TSS (NM_028307)	-27	NM_001357712	72634	Mm.331198	NM_028307	ENSMUSG00000041912	Tdrkh	2700091C21Rik|Tdrd2	tudor and KH domain containing protein	protein-coding
chr4	43381645	43382434	promoter-TSS (NM_001369199)	promoter-TSS (NM_001369199)	-30	NM_001369199	100213	Mm.235730	NM_199057	ENSMUSG00000035969	Rusc2	AI840675|mKIAA0375	RUN and SH3 domain containing 2	protein-coding
chr13	23933363	23935008	promoter-TSS (NM_175663)	promoter-TSS (NM_175663)	-29	NM_175663	319177	Mm.377879	NM_175663	ENSMUSG00000050799	Hist1h2ba	Th2b	histone cluster 1, H2ba	protein-coding
chr2	121806941	121807303	promoter-TSS (NM_172673)	promoter-TSS (NM_172673)	-65	NM_001360084	228564	Mm.121514	NM_172673	ENSMUSG00000027238	Frmd5	1500032A09Rik|A930004K21Rik|R75430	FERM domain containing 5	protein-coding
chr8	119861913	119862560	promoter-TSS (NM_146219)	promoter-TSS (NM_146219)	-69	NM_146219	234796	Mm.86446	NM_146219	ENSMUSG00000031828	Klhl36	-	kelch-like 36	protein-coding
chr5	58724992	58726642	Intergenic	L1Md_T|LINE|L1	-272819	NR_046190	78163	Mm.243828	NR_046190	ENSMUSG00000105234	4930459L07Rik	-	RIKEN cDNA 4930459L07 gene	ncRNA
chr19	10605332	10605938	promoter-TSS (NM_015735)	promoter-TSS (NM_015735)	38	NM_015735	13194	Mm.289915	NM_015735	ENSMUSG00000024740	Ddb1	127kDa|AA408517|p127-Ddb1	damage specific DNA binding protein 1	protein-coding
chr7	92487204	92487785	Intergenic	Intergenic	-73655	NM_001162918	66365	Mm.21173	NM_025515	ENSMUSG00000030613	Ccdc90b	2310015N07Rik|C86558	coiled-coil domain containing 90B	protein-coding
chr4	41502772	41503346	promoter-TSS (NM_001085515)	promoter-TSS (NM_001085515)	16	NM_001085515	329828	Mm.27054	NM_001085515	ENSMUSG00000046312	Myorg	AA408153|AI464131|AI604836|Gm762|Kiaa1161|NET37	myogenesis regulating glycosidase (putative)	protein-coding
chrX	112370809	112371159	intron (NM_026565, intron 8 of 8)	intron (NM_026565, intron 8 of 8)	35795	NM_028655	73809	Mm.50508	NM_028655	ENSMUSG00000025527	Satl1	4930404K22Rik	spermidine/spermine N1-acetyl transferase-like 1	protein-coding
chr18	3008369	3010786	Intergenic	Intergenic	113835	NM_001167539	100312476	Mm.480293	NM_001167539	ENSMUSG00000091539	Vmn1r238	-	vomeronasal 1 receptor, 238	protein-coding
chr1	133363334	133363837	promoter-TSS (NM_175443)	promoter-TSS (NM_175443)	13	NM_175443	214253	Mm.52111	NM_175443	ENSMUSG00000070644	Etnk2	4933417N20Rik|AI197444|EKI 2|Eki2|Tuc1	ethanolamine kinase 2	protein-coding
chr12	111038983	111039569	promoter-TSS (NM_198023)	promoter-TSS (NM_198023)	-91	NM_198023	217864	Mm.23808	NM_198023	ENSMUSG00000037896	Rcor1	5730409O11|6720480E22Rik|AU042633|D12Wsu95e|Rocr1|mKIAA0071	REST corepressor 1	protein-coding
chrY	8833079	8833541	exon (NM_001017394, exon 2 of 2)	exon (NM_001017394, exon 2 of 2)	1859	NM_001017394	100039753	Mm.291725	NM_001017394	ENSMUSG00000101053	Gm20815	-	predicted gene, 20815	protein-coding
chr9	113930670	113931226	promoter-TSS (NM_001083319)	promoter-TSS (NM_001083319)	14	NM_001083319	22221	Mm.28052	NM_013699	ENSMUSG00000009741	Ubp1	Cp2b|LBP-1a|LBP-1b|NF2d9	upstream binding protein 1	protein-coding
chr11	6388814	6389343	Intergenic	(CCCCAG)n|Simple_repeat|Simple_repeat	-6047	NM_028601	52915	Mm.1144	NM_028601	ENSMUSG00000041164	Zmiz2	Zimp7	zinc finger, MIZ-type containing 2	protein-coding
chr3	69126450	69127503	5' UTR (NM_008467, exon 1 of 17)	5' UTR (NM_008467, exon 1 of 17)	116	NM_008467	16649	Mm.30601	NM_008467	ENSMUSG00000027782	Kpna4	1110058D08Rik|IPOA3	karyopherin (importin) alpha 4	protein-coding
chr6	31216019	31217293	intron (NR_110469, intron 1 of 3)	CpG	1818	NR_110470	232685	Mm.443019	NM_144555	ENSMUSG00000044471	Lncpint	Lincpint|MNCb-1768|Pint|linc-Pint	long non-protein coding RNA, Trp53 induced transcript	ncRNA
chr8	110919465	110920153	promoter-TSS (NM_009179)	promoter-TSS (NM_009179)	-56	NM_009179	20444	Mm.200388	NM_009179	ENSMUSG00000031749	St3gal2	AI429591|AW822065|ST3GalII|Siat5	ST3 beta-galactoside alpha-2,3-sialyltransferase 2	protein-coding
chr9	91261321	91262001	Intergenic	L1Md_T|LINE|L1	104138	NM_009573	22771	Mm.335350	NM_009573	ENSMUSG00000032368	Zic1	ZIC|ZNF201	zinc finger protein of the cerebellum 1	protein-coding
chr2	121522334	121522676	intron (NM_001290987, intron 4 of 11)	(TTAGGG)n|Simple_repeat|Simple_repeat	14012	NM_001369185	241627	Mm.293284	NM_030234	ENSMUSG00000027242	Wdr76	5830411K18Rik|6030457D09|AA517836	WD repeat domain 76	protein-coding
chr5	83388715	83389693	Intergenic	L1Md_Gf|LINE|L1	-34009	NM_153801	243078	Mm.126783	NM_153801	ENSMUSG00000049537	Tecrl	D330017N19Rik|Srd5a2l2	trans-2,3-enoyl-CoA reductase-like	protein-coding
chr6	108212866	108213312	promoter-TSS (NM_010585)	promoter-TSS (NM_010585)	-7	NM_010585	16438	Mm.227912	NM_010585	ENSMUSG00000030102	Itpr1	D6Pas2|Gm10429|IP3R 1|IP3R1|InsP3R|Ip3r|Itpr-1|P400|Pcp-1|Pcp1|insP3R1|opt|wblo	inositol 1,4,5-trisphosphate receptor 1	protein-coding
chr3	91095413	91100016	Intergenic	L1Md_A|LINE|L1	-6909	NM_001101461	229550	Mm.98335	NM_001101461	ENSMUSG00000091175	9130204L05Rik	Gm127	RIKEN cDNA 9130204L05 gene	protein-coding
chr13	56744708	56745456	Intergenic	(CA)n|Simple_repeat|Simple_repeat	41414	NM_001164042	17129	Mm.272920	NM_008541	ENSMUSG00000021540	Smad5	1110051M15Rik|AI451355|Dwf-C|Madh5|MusMLP	SMAD family member 5	protein-coding
chr18	67740457	67741042	Intergenic	RMER1A|Other|Other	-16128	NM_001127177	19255	Mm.260433	NM_008977	ENSMUSG00000024539	Ptpn2	AI325124|Ptpt|TC-PTP	protein tyrosine phosphatase, non-receptor type 2	protein-coding
chr15	103272637	103273093	promoter-TSS (NM_019817)	promoter-TSS (NM_019817)	-23	NM_019817	56447	Mm.29473	NM_019817	ENSMUSG00000060992	Copz1	5930435A22Rik|AA407760|D4Ertd360e	coatomer protein complex, subunit zeta 1	protein-coding
chrX	14190729	14191438	Intergenic	L1Md_T|LINE|L1	-20065	NM_001034100	385328	Mm.275681	NM_001034100	ENSMUSG00000078346	H2al1n	EG385328|Gm5382	H2A histone family member L1N	protein-coding
chr2	122186200	122186614	promoter-TSS (NM_026251)	promoter-TSS (NM_026251)	135	NM_028914	74401	Mm.374834	NM_028914	ENSMUSG00000027229	Terb2	4933406J08Rik	telomere repeat binding bouquet formation protein 2	protein-coding
chr6	95117625	95118255	promoter-TSS (NR_153843)	promoter-TSS (NR_153843)	60	NM_001102670	243574	Mm.333275	NM_001008785	ENSMUSG00000030031	Kbtbd8	AU040152|SSEC-51|SSEC51|Takrp|mKIAA1842	kelch repeat and BTB (POZ) domain containing 8	protein-coding
chr10	67979408	67979827	promoter-TSS (NM_001359319)	promoter-TSS (NM_001359319)	47	NM_001359319	170799	Mm.209844	NM_133244	ENSMUSG00000037846	Rtkn2	B130039D23Rik|Mbf|Plekhk1	rhotekin 2	protein-coding
chr6	117087279	117088281	Intergenic	L1Md_T|LINE|L1	-80755	NM_001012477	20315	Mm.303231	NM_013655	ENSMUSG00000061353	Cxcl12	Pbsf|Scyb12|Sdf1|Tlsf|Tpar1	chemokine (C-X-C motif) ligand 12	protein-coding
chr17	24719630	24720204	promoter-TSS (NM_008503)	promoter-TSS (NM_008503)	48	NR_027900	73474	Mm.443320	NR_027900	ENSMUSG00000090101	Snhg9	1700072N11Rik	small nucleolar RNA host gene 9	ncRNA
chr2	98307469	98308128	Intergenic	L1Md_T|LINE|L1	840141	NM_178725	241568	Mm.241682	NM_178725	ENSMUSG00000050587	Lrrc4c	6430556C10Rik|NGL-1	leucine rich repeat containing 4C	protein-coding
chr8	69625140	69625748	promoter-TSS (NM_001045553)	promoter-TSS (NM_001045553)	104	NM_172754	234362	Mm.458487	NM_172754	ENSMUSG00000060427	Zfp868	AI449175|AW108241|C530032E20|mszf62	zinc finger protein 868	protein-coding
chrX	61265150	61266386	Intergenic	L1Md_T|LINE|L1	-22426	NM_001362886	245440		NM_001362886		Gm4988	EG245440	predicted gene 4988	protein-coding
chr3	152502785	152503195	intron (NM_001081277, intron 9 of 13)	intron (NM_001081277, intron 9 of 13)	106306	NM_001287139	108946	Mm.379292	NM_198416	ENSMUSG00000039068	Zzz3	3110065C23Rik|6430567E01Rik|AA408566|AI481057|AW556059|R75514	zinc finger, ZZ domain containing 3	protein-coding
chr1	75191581	75192380	promoter-TSS (NM_026187)	promoter-TSS (NM_026187)	30	NM_001288612	245860	Mm.238266	NM_001003917	ENSMUSG00000033124	Atg9a	AU019532|Apg9l1|Atg9|Atg9l1	autophagy related 9A	protein-coding
chr7	28810372	28811319	promoter-TSS (NM_177301)	promoter-TSS (NM_177301)	-45	NM_177301	15388	Mm.9043	NM_177301	ENSMUSG00000015165	Hnrnpl	C79783|D830027H13Rik|Hnrpl	heterogeneous nuclear ribonucleoprotein L	protein-coding
chr8	121245109	121245350	Intergenic	(CCTG)n|Simple_repeat|Simple_repeat	117544	NM_008024	14241	Mm.5111	NM_008024	ENSMUSG00000097084	Foxl1	FREAC7|Fkh6|fkh-6	forkhead box L1	protein-coding
chr4	119294165	119294948	promoter-TSS (NM_011732)	promoter-TSS (NM_011732)	-43	NM_011732	22608	Mm.258204	NM_011732	ENSMUSG00000028639	Ybx1	1700102N10Rik|C79409|EF1A|MSY1|Nsep1|YB-1|dbpB|mYB-1a	Y box protein 1	protein-coding
chr12	64965286	64966175	promoter-TSS (NM_025707)	promoter-TSS (NM_025707)	-12	NM_001364325	328108	Mm.138465	NM_177805	ENSMUSG00000035614	Togaram1	A430041B07Rik|BC062107|C130034K06|Fam179b	TOG array regulator of axonemal microtubules 1	protein-coding
chr14	51088670	51089720	Intergenic	Intergenic	-1882	NM_001161731	11727	Mm.202665	NM_007447	ENSMUSG00000072115	Ang	AI385586|Ang1|Rnase5|Rnase5a	angiogenin, ribonuclease, RNase A family, 5	protein-coding
chr3	28780865	28781755	promoter-TSS (NM_177586)	promoter-TSS (NM_177586)	33	NM_177586	208691	Mm.193670	NM_177586	ENSMUSG00000050192	Eif5a2	9630038B20|eIF5AII	eukaryotic translation initiation factor 5A2	protein-coding
chr16	78350327	78351041	intron (NM_009988, intron 7 of 7)	L1Md_T|LINE|L1	26073	NR_002700	654432	Mm.458574	NR_002700		Gm7334	EG654432	B-cell translocation gene 3 pseudogene	pseudo
chr2	152398282	152399161	promoter-TSS (NM_011438)	promoter-TSS (NM_011438)	-675	NM_011438	20667	Mm.28424	NM_011438	ENSMUSG00000051817	Sox12	2010205A02Rik	SRY (sex determining region Y)-box 12	protein-coding
chr8	81014753	81015311	promoter-TSS (NM_027554)	promoter-TSS (NM_027554)	-126	NM_027554	74841	Mm.246018	NM_027554	ENSMUSG00000038250	Usp38	4631402N15Rik|4833420O05Rik|AA536967|AU044701|AW544820|mKIAA1891	ubiquitin specific peptidase 38	protein-coding
chr13	17804604	17805749	promoter-TSS (NM_027118)	promoter-TSS (NM_027118)	-79	NM_027118	69562	Mm.193924	NM_027118	ENSMUSG00000041297	Cdk13	2310015O17Rik|Cdc2l5	cyclin-dependent kinase 13	protein-coding
chr7	6154966	6156328	intron (NM_001013012, intron 1 of 2)	CpG	324	NM_001013012	67109	Mm.3254	NM_001013012	ENSMUSG00000046792	Zfp787	2210018M03Rik|Znf787	zinc finger protein 787	protein-coding
chr7	25777258	25777605	intron (NM_001190974, intron 6 of 18)	ZP3AR|Satellite|Satellite	11302	NM_001190974	26362	Mm.4128	NM_009465	ENSMUSG00000002602	Axl	AI323647|Ark|Tyro7|Ufo	AXL receptor tyrosine kinase	protein-coding
chr4	118134613	118135346	promoter-TSS (NM_009176)	promoter-TSS (NM_009176)	-33	NM_009176	20441	Mm.251002	NM_009176	ENSMUSG00000028538	St3gal3	ST3GalIII|ST3N|Siat3|Siat6	ST3 beta-galactoside alpha-2,3-sialyltransferase 3	protein-coding
chr1	21078916	21079747	promoter-TSS (NM_177409)	promoter-TSS (NM_177409)	-106	NM_177409	170829	Mm.185680	NM_177409	ENSMUSG00000041779	Tram2	C330003D03Rik	translocating chain-associating membrane protein 2	protein-coding
chr7	19118081	19118872	promoter-TSS (NM_001370811)	promoter-TSS (NM_001370811)	-132	NM_001370812	243866	Mm.446370	NM_001370811	ENSMUSG00000085601	Gm4969	9330180I18|EG243866	predicted gene 4969	protein-coding
chr5	100039527	100040132	promoter-TSS (NM_016690)	promoter-TSS (NM_016690)	-165	NR_027990	67870	Mm.11311	NM_026421	ENSMUSG00000029326	Enoph1	2310057D15Rik|BB183658|C81437	enolase-phosphatase 1	protein-coding
chr12	76962054	76962584	promoter-TSS (NM_008558)	promoter-TSS (NM_008558)	-71	NM_001361664	17187	Mm.268548	NM_008558	ENSMUSG00000059436	Max	AA960152|AI875693|bHLHd4|bHLHd5|bHLHd6|bHLHd7|bHLHd8	Max protein	protein-coding
chr5	108461055	108461618	promoter-TSS (NM_172716)	promoter-TSS (NM_172716)	4	NM_172716	69587	Mm.261218	NM_172716	ENSMUSG00000033623	Pcgf3	2310035N15Rik|AI662857|D630042K08Rik|DONG1|E430039C14|RNF3A|Rnf3	polycomb group ring finger 3	protein-coding
chr16	16983070	16983864	promoter-TSS (NM_011949)	promoter-TSS (NM_011949)	85	NM_011949	26413	Mm.196581	NM_011949	ENSMUSG00000063358	Mapk1	9030612K14Rik|AA407128|AU018647|C78273|ERK|Erk2|MAPK2|PRKM2|Prkm1|p41mapk|p42mapk	mitogen-activated protein kinase 1	protein-coding
chr18	46311651	46312115	promoter-TSS (NM_001160399)	promoter-TSS (NM_001160399)	45	NM_001160399	240261	Mm.329416	NM_001160399	ENSMUSG00000071855	Ccdc112	8430438M01Rik|AW108467	coiled-coil domain containing 112	protein-coding
chr3	107695963	107697058	promoter-TSS (NM_001357113)	promoter-TSS (NM_001357113)	50	NM_001357111	229709	Mm.220328	NM_145542	ENSMUSG00000027893	Ahcyl1	1110034F20Rik|AA409031|AA414901|Ahcy-rs3|DCAL|Irbit	S-adenosylhomocysteine hydrolase-like 1	protein-coding
chr16	77013476	77014082	promoter-TSS (NM_013918)	promoter-TSS (NM_013918)	-290	NM_013918	30940	Mm.40986	NM_013918	ENSMUSG00000022867	Usp25	-	ubiquitin specific peptidase 25	protein-coding
chrY	7026666	7029615	Intergenic	Intergenic	139637	NM_001101623	100040160	Mm.482062	NM_001101623	ENSMUSG00000094081	Gm20826	-	predicted gene, 20826	protein-coding
chr7	19175862	19176570	promoter-TSS (NM_001347582)	promoter-TSS (NM_001347582)	-205	NM_001347582	72205	Mm.154121	NM_028153	ENSMUSG00000040811	Eml2	1600029N02Rik|EMAP-2	echinoderm microtubule associated protein like 2	protein-coding
chr7	35585619	35586525	promoter-TSS (NM_178263)	promoter-TSS (NM_178263)	-175	NM_178263	245886	Mm.272620	NM_145633	ENSMUSG00000034867	Ankrd27	AA408090|BC016493|D330003H11Rik|Varp	ankyrin repeat domain 27 (VPS9 domain)	protein-coding
chr3	14533743	14534404	intron (NM_001163580, intron 1 of 18)	CpG	285	NM_001163580	71710	Mm.257449	NM_028915	ENSMUSG00000027550	Lrrcc1	1200008A14Rik|4932441F23Rik|AI195358|AI447421	leucine rich repeat and coiled-coil domain containing 1	protein-coding
chr6	114604435	114605002	Intergenic	IMPB_01|Satellite|Satellite	-38379	NM_001253717	74244	Mm.275332	NM_028835	ENSMUSG00000030314	Atg7	1810013K23Rik|Agp7|Apg7l|Atg7l|Gm21553	autophagy related 7	protein-coding
chr5	143909514	143910071	promoter-TSS (NM_001172146)	promoter-TSS (NM_001172146)	47	NM_001172146	231872	Mm.200499	NM_146165	ENSMUSG00000029610	Aimp2	AA407136|AA407225|Aimp2(p38)|Jtv1	aminoacyl tRNA synthetase complex-interacting multifunctional protein 2	protein-coding
chr5	92137547	92138195	promoter-TSS (NM_019490)	promoter-TSS (NM_019490)	-67	NM_019490	56041	Mm.15868	NM_019490	ENSMUSG00000029407	Uso1	115kDa|TAP|Vdp	USO1 vesicle docking factor	protein-coding
chr6	84764374	84765225	intron (NM_177077, intron 19 of 21)	L1Md_Gf|LINE|L1	-170891	NM_001177713	232174	Mm.255246	NM_175475	ENSMUSG00000063415	Cyp26b1	CP26|P450RAI-2	cytochrome P450, family 26, subfamily b, polypeptide 1	protein-coding
chr8	17909424	17909871	Intergenic	RLTR10D2|LTR|ERVK	-374262	NM_053171	94109	Mm.436988	NM_053171	ENSMUSG00000060924	Csmd1	B930082H09|mKIAA1890	CUB and Sushi multiple domains 1	protein-coding
chr3	40744846	40745951	promoter-TSS (NM_011020)	promoter-TSS (NM_011020)	-215	NM_011020	18415	Mm.39330	NM_011020	ENSMUSG00000025757	Hspa4l	94kDa|AI461691|APG-1|Osp94	heat shock protein 4 like	protein-coding
chr7	16181013	16181312	intron (NR_102730, intron 6 of 12)	ZP3AR|Satellite|Satellite	5767	NR_102730	17537	Mm.360516	NM_008627	ENSMUSG00000041420	Meis3	AI573393|Mrg2	Meis homeobox 3	protein-coding
chr18	78696515	78697637	Intergenic	L1_Mus2|LINE|L1	-100126	NM_207651	27411	Mm.44158	NM_030683	ENSMUSG00000024552	Slc14a2	UT-A1|UT-A3	solute carrier family 14 (urea transporter), member 2	protein-coding
chr9	106685394	106686143	promoter-TSS (NM_011573)	promoter-TSS (NM_011573)	48	NM_011573	21767	Mm.22266	NM_011573	ENSMUSG00000040813	Tex264	TEG-264	testis expressed gene 264	protein-coding
chr4	82512931	82513577	intron (NR_137202, intron 1 of 1)	CpG	5265	NR_137202	102635783	Mm.41666	NR_137202		Gm11266	-	predicted gene 11266	ncRNA
chr16	58669969	58670785	5' UTR (NM_007757, exon 1 of 7)	5' UTR (NM_007757, exon 1 of 7)	169	NM_007757	12892	Mm.291519	NM_007757	ENSMUSG00000022742	Cpox	CPX|Cpo|HCP|cac|nct	coproporphyrinogen oxidase	protein-coding
chr17	65884297	65885263	5' UTR (NM_001198949, exon 1 of 10)	5' UTR (NM_001198949, exon 1 of 10)	143	NM_001198949	19765	Mm.17009	NM_009067	ENSMUSG00000024096	Ralbp1	RLIP76|Rip1	ralA binding protein 1	protein-coding
chr9	118793345	118793654	intron (NM_001113514, intron 3 of 13)	C-rich|Low_complexity|Low_complexity	81807	NM_001113514	104099	Mm.335520	NM_133721	ENSMUSG00000039115	Itga9	(alpha)9|2610002H11Rik|6720458D17Rik|AI461869|D130073C02|D9Ertd428e	integrin alpha 9	protein-coding
chr11	26593406	26593858	5' UTR (NM_027260, exon 1 of 13)	5' UTR (NM_027260, exon 1 of 13)	288	NM_027260	69922	Mm.285351	NM_027260	ENSMUSG00000064090	Vrk2	2810003O05Rik|AI447698	vaccinia related kinase 2	protein-coding
chr2	32775368	32775997	promoter-TSS (NM_001290563)	promoter-TSS (NM_001290563)	-49	NM_177384	338348	Mm.475130	NM_177384	ENSMUSG00000039021	Ttc16	1200002K10Rik	tetratricopeptide repeat domain 16	protein-coding
chr5	139200293	139201019	promoter-TSS (NM_024451)	promoter-TSS (NM_024451)	19	NM_001256117	77053	Mm.210845	NM_024451	ENSMUSG00000036817	Sun1	4632417G13Rik|5730434D03Rik|Unc84a|mKIAA0810	Sad1 and UNC84 domain containing 1	protein-coding
chr15	65370212	65370943	Intergenic	L1Md_T|LINE|L1	-416443	NM_001356582	76740	Mm.260647	NM_133766	ENSMUSG00000015002	Efr3a	A130089M23Rik|BB071175|C76891|C920006C10Rik|D030063F01Rik|mKIAA0143	EFR3 homolog A	protein-coding
chr18	40219045	40219655	promoter-TSS (NM_023311)	promoter-TSS (NM_023311)	49	NM_023311	67180	Mm.270382	NM_023311	ENSMUSG00000024487	Yipf5	2610311I19Rik|AA408236|Yip1a	Yip1 domain family, member 5	protein-coding
chr18	24529660	24530382	exon (NM_001360807, exon 1 of 8)	exon (NM_001360807, exon 1 of 8)	183	NM_144861	225283	Mm.28427	NM_144861	ENSMUSG00000040446	Rprd1a	C77387|mKIAA4077	regulation of nuclear pre-mRNA domain containing 1A	protein-coding
chr2	94273268	94274386	Intergenic	CpG	-12428	NR_030431	735259		NR_030431	ENSMUSG00000076335	Mir670	Mirn670|mir-670|mmu-mir-670	microRNA 670	ncRNA
chr6	114543023	114543580	Intergenic	IMPB_01|Satellite|Satellite	84779	NM_001317124	15465	Mm.333327	NM_008285	ENSMUSG00000053004	Hrh1	Bphs|H1R|HH1R|Hir	histamine receptor H1	protein-coding
chr8	47674979	47675639	promoter-TSS (NM_023503)	promoter-TSS (NM_023503)	-150	NM_023503	69260	Mm.430733	NM_023503	ENSMUSG00000063049	Ing2	2810011M06Rik|Ing1l|Ing2b|P33ING2	inhibitor of growth family, member 2	protein-coding
chr13	66680700	66681103	Intergenic	Intergenic	224449	NM_026219	67530	Mm.379136	NM_026219	ENSMUSG00000021520	Uqcrb	2210415M14Rik|QP-C|QPC|UQBC|UQBP|UQPC	ubiquinol-cytochrome c reductase binding protein	protein-coding
chr19	46148200	46148653	promoter-TSS (NM_008852)	promoter-TSS (NM_008852)	-101	NM_008852	18742	Mm.6255	NM_008852	ENSMUSG00000025229	Pitx3	Ptx3|ak|aphakia	paired-like homeodomain transcription factor 3	protein-coding
chr9	107554184	107555129	promoter-TSS (NM_019713)	promoter-TSS (NM_019713)	73	NM_019713	56289	Mm.12091	NM_019713	ENSMUSG00000010067	Rassf1	123F2|AA536941|AU044980|NORE2A|RDA32|REH3P21|Rassf1A|Rassf1B|Rassf1C	Ras association (RalGDS/AF-6) domain family member 1	protein-coding
chr17	63863561	63864663	intron (NM_001037997, intron 1 of 18)	CpG	131	NM_001037997	14158	Mm.23039	NM_008000	ENSMUSG00000000127	Fer	AV082135|C330004K01Rik|Fert|Fert2	fer (fms/fps related) protein kinase	protein-coding
chr8	84223211	84223911	intron (NM_172503, intron 9 of 13)	intron (NM_172503, intron 9 of 13)	13481	NM_172503	212168	Mm.117094	NM_172503	ENSMUSG00000035671	Zswim4	D330002I24|E130119J17Rik	zinc finger SWIM-type containing 4	protein-coding
chr3	103913929	103915216	exon (NM_001356558, exon 1 of 6)	exon (NM_001356558, exon 1 of 6)	452	NM_172684	229675	Mm.29366	NM_172684	ENSMUSG00000044098	Rsbn1	C230004D03Rik|E330004N01|KDM9|Rosbin|Rsbn|Rsbp|mKIAA3002	rosbin, round spermatid basic protein 1	protein-coding
chr2	173056801	173057101	Intergenic	Intergenic	35049	NM_019547	56190	Mm.485782	NM_019547	ENSMUSG00000027510	Rbm38	Rnpc1|Seb4|Seb4l	RNA binding motif protein 38	protein-coding
chr19	3708027	3708599	promoter-TSS (NM_028077)	promoter-TSS (NM_028077)	20	NM_028077	72056	Mm.23780	NM_028077	ENSMUSG00000035372	1810055G02Rik	AI256204	RIKEN cDNA 1810055G02 gene	protein-coding
chr1	144003991	144004803	promoter-TSS (NM_009061)	promoter-TSS (NM_009061)	-248	NM_009061	19735	Mm.28262	NM_009061	ENSMUSG00000026360	Rgs2	GOS8	regulator of G-protein signaling 2	protein-coding
chr3	107333007	107334268	promoter-TSS (NM_001045807)	promoter-TSS (NM_001045807)	-348	NM_001045807	229700	Mm.27966	NM_001045807	ENSMUSG00000048109	Rbm15	C230088J01Rik|mKIAA1438	RNA binding motif protein 15	protein-coding
chr3	36475447	36475988	promoter-TSS (NM_028183)	promoter-TSS (NM_028183)	170	NM_009673	11747	Mm.1620	NM_009673	ENSMUSG00000027712	Anxa5	Anx5|R74653	annexin A5	protein-coding
chr9	77910426	77911026	Intergenic	CpG	-6639	NM_134255	68801	Mm.430736	NM_134255	ENSMUSG00000032349	Elovl5	1110059L23Rik|AI747313|AU043003|HELO1	ELOVL family member 5, elongation of long chain fatty acids (yeast)	protein-coding
[truncated: 10,912 more rows]

## Sheet: P8 Aundiff ctrl ATAC
Chr	Start	End	Annotation	Detailed Annotation	Distance to TSS	Nearest PromoterID	Entrez ID	Nearest Unigene	Nearest Refseq	Nearest Ensembl	Gene Name	Gene Alias	Gene Description	Gene Type
[truncated: 17,418 more rows]

[truncated: 2 more sheets: A8 Adiff ctrl ATAC, A8 Aundiff cKO ATAC]
