# Supplementary material for: The SMARCA5–DMRT1 Pioneer Complex Establishes Epigenetic Priming to Direct Male Germline Development
Source: Research Square preprint supplement (doi:10.21203/rs.3.rs-7576931/v1), 2025-10-08
Supplement: Supplementary file 4 [file 7ada9e0cb41fb32db475418a.xlsx]

## Sheet: C_vs_cKO
Supplementary Table 2: Gene expression changes between Smarca5-ctrl Aundiff and Smarca5-cKO Aundiff at P8.
Geneid	baseMean	log2FC (KO/Ctrl)	pvalue	padj	Undiff_C_Ave	Undiff_KO_Ave	Undiff_Ctrl_1	Undiff_Ctrl_2	Undiff_cKO_1	Undiff_cKO_2
Cyp2c55	281.478	-11.4301	6.93567e-15	4.12033e-13	22.7598	0	26.3417	19.1779	0	0
Gm35676	23.8124	-7.86672	2.03661e-06	2.59928e-05	8.30128	0	8.14005	8.46251	0	0
Gm46305	61.4424	-7.78926	2.39065e-07	3.81758e-06	8.01153	0.0332879	8.01819	8.00488	0.0665758	0
Lrrc43	19.3367	-7.56645	8.81612e-06	9.52781e-05	1.55321	0	1.66262	1.44381	0	0
1700015G11Rik	15.6877	-7.26517	4.97482e-05	0.000436494	6.77993	0	10.0702	3.48969	0	0
Gm39604	13.7579	-7.07551	8.58377e-05	0.000703947	2.43565	0	2.88339	1.9879	0	0
3110053B16Rik	35.3036	-6.97647	8.74992e-06	9.47165e-05	4.695	0.0370198	3.96096	5.42903	0	0.0740396
Hba-a1	12.7728	-6.96878	0.000254651	0.00182255	3.83528	0	6.59403	1.07653	0	0
Ccdc92b	34.7191	-6.95249	9.47744e-06	0.000101709	1.32926	0.0106466	1.49619	1.16234	0	0.0212932
Gm40881	68.4873	-6.92884	7.7346e-10	2.0422e-08	5.07837	0.0412728	4.8774	5.27935	0	0.0825457
Gm34933	11.0814	-6.76348	0.000328464	0.00225696	3.42535	0	4.35254	2.49816	0	0
Hbb-bs	11.0243	-6.75636	0.000481875	0.00315574	2.89481	0	4.73016	1.05947	0	0
Gm45521	10.4234	-6.67511	0.00045531	0.00300246	1.40238	0	1.7172	1.08755	0	0
1700084M14Rik	27.4324	-6.62051	3.76995e-05	0.000342677	8.13198	0.0761037	7.51719	8.74678	0.152207	0
Cfap53	95.036	-6.40615	1.52688e-14	8.56124e-13	2.36072	0.0266303	2.68902	2.03242	0.0255431	0.0277176
Gm20751	8.02325	-6.29714	0.00179617	0.00965878	1.05669	0	0.928771	1.1846	0	0
2410012E07Rik	21.8322	-6.27335	0.000142369	0.00110966	2.65752	0.0340189	3.04229	2.27274	0	0.0680378
Gm47412	20.5225	-6.1824	0.000195868	0.00145722	3.29042	0.0448627	3.51053	3.0703	0	0.0897253
Ccl4	7.05076	-6.11158	0.00448173	0.0206224	1.34008	0	2.25422	0.425947	0	0
Gm29758	74.6533	-6.05303	1.52022e-12	6.29566e-11	9.4128	0.135636	10.3142	8.51139	0.130098	0.141173
Gm5953	56.5123	-6.04721	1.95036e-09	4.72464e-08	2.18768	0.0325861	1.56116	2.8142	0	0.0651722
Gm33067	16.9937	-5.92564	0.000948929	0.00562065	2.23818	0.033898	3.87697	0.599381	0.0677959	0
Gm46520	15.8869	-5.82478	0.000770185	0.00469282	5.05322	0.0822862	3.85004	6.2564	0.164572	0
Gm3858	258.354	-5.73942	4.33228e-05	0.000388136	23.0299	0.417233	25.8264	20.2333	0.784396	0.0500691
Gm46732	13.828	-5.59932	0.00152283	0.00843432	1.97948	0.0403176	2.38226	1.57671	0	0.0806352
Vsx2	64.7459	-5.53925	2.34827e-11	7.95822e-10	3.25532	0.0652284	3.11976	3.39089	0.130457	0
Adipoq	12.7693	-5.48081	0.00215558	0.0112519	1.69376	0.0374705	1.55581	1.83171	0	0.074941
Tmem132b	88.7521	-5.4669	5.23258e-15	3.13656e-13	1.82251	0.040121	1.89765	1.74738	0.0106836	0.0695585
Cnga3	72.128	-5.41372	5.77919e-13	2.58073e-11	3.0496	0.0678457	3.14397	2.95523	0.0879648	0.0477267
Dpp7	205.328	-5.33693	6.89397e-33	3.62133e-30	19.593	0.45998	19.7652	19.4207	0.596383	0.323577
Gm46819	31.4509	-5.19454	1.99549e-06	2.5517e-05	5.92577	0.155918	7.32951	4.52203	0.0983629	0.213474
Gm24175	10.5061	-5.1901	0.00517098	0.0232055	1.11828	0.0301921	1.30181	0.934744	0	0.0603841
Gm38628	9.9937	-5.14539	0.00662356	0.0285249	1.08414	0.0282671	1.51851	0.649761	0.0565342	0
Atp1b4	29.8395	-5.09637	4.472e-06	5.25092e-05	1.13223	0.0323728	1.05119	1.21326	0	0.0647457
Tcp11x2	27.7623	-5.05019	1.59002e-05	0.00016099	2.54688	0.0718614	3.61134	1.48242	0.143723	0
Gm32857	18.7704	-5.03897	0.000192145	0.00143433	2.14307	0.0623371	2.38312	1.90302	0.0597919	0.0648822
Lrrc18	37.745	-5.03235	2.27484e-07	3.65898e-06	2.03116	0.0599844	2.46715	1.59517	0.0281922	0.0917767
Gm40438	8.97939	-4.98629	0.00987268	0.0397156	3.42842	0.100099	2.255	4.60183	0.200197	0
Chil1	34.3962	-4.92371	5.91294e-07	8.6278e-06	2.69109	0.0838348	2.98726	2.39492	0.123132	0.044538
Gm5784	54.5961	-4.91345	0.00577675	0.0254434	1.57853	0.0494876	1.38301	1.77405	0	0.0989752
Gm35941	16.8573	-4.84694	0.000533271	0.00343818	2.1594	0.0732757	1.93079	2.38801	0	0.146551
Slamf9	15.9022	-4.82349	0.000738523	0.00453311	2.1244	0.0702592	1.82629	2.42252	0.140518	0
Gm19663	55.1687	-4.79253	4.54343e-10	1.24755e-08	3.51798	0.120283	4.06978	2.96618	0.167752	0.0728134
Gm4889	14.2907	-4.66606	0.00145488	0.00809617	5.20457	0.192063	5.82448	4.58465	0.384126	0
Gm39575	43.8565	-4.66547	2.20778e-08	4.45147e-07	18.254	0.687641	20.7639	15.7442	0.659565	0.715716
Gm10479	29.7536	-4.65396	1.00897e-05	0.000107299	2.1575	0.0834032	1.66489	2.65011	0	0.166806
Tnni2	29.3948	-4.63664	9.59628e-06	0.000102764	6.52393	0.255048	7.22957	5.8183	0	0.510096
Gm14412	49.0078	-4.62913	2.7184e-08	5.35128e-07	2.6046	0.0993459	3.52326	1.68593	0.168261	0.0304309
Lncenc1	312.396	-4.62137	1.90426e-43	1.90055e-40	14.1827	0.550656	16.2669	12.0984	0.528173	0.573138
Pdzk1	20.7132	-4.54223	0.00018427	0.00138592	1.01147	0.0422358	0.921796	1.10115	0	0.0844715
Gm31223	12.9889	-4.4491	0.00321519	0.015619	2.9895	0.132845	4.0308	1.9482	0	0.26569
Ifitm1	24.3886	-4.43231	5.80419e-05	0.00049874	4.52302	0.196953	4.6929	4.35314	0.393907	0
Gm39871	18.834	-4.42405	0.000275025	0.00194609	3.70841	0.166095	4.26712	3.1497	0.104783	0.227407
Helz2	176.988	-4.41908	0.00134292	0.00755523	2.74807	0.124684	2.46358	3.03257	0.231431	0.0179381
Gm48277	17.86	-4.3967	0.000570226	0.00363884	3.23618	0.144373	3.91957	2.55279	0.288746	0
8430426J06Rik	18.4334	-4.39125	0.000315083	0.00218154	2.40164	0.110097	2.34704	2.45624	0.0694563	0.150739
Slc47a1	83.4235	-4.32474	0.00187703	0.0100305	3.58374	0.172653	4.79971	2.36777	0.320467	0.0248392
Gm9269	11.0069	-4.27797	0.00660279	0.0284477	1.20513	0.0584769	0.962683	1.44758	0.116954	0
D5Ertd605e	38.5149	-4.25437	4.18467e-07	6.30417e-06	5.77499	0.287229	6.73348	4.81649	0.400583	0.173874
Gm10043	82.8379	-4.22114	7.13309e-13	3.14312e-11	22.2778	1.1491	22.1164	22.4392	0.57684	1.72136
Zfp996	127.911	-4.16717	1.93329e-17	1.65624e-15	7.74273	0.413987	6.59685	8.8886	0.227758	0.600216
Gm38538	10.3655	-4.14509	0.00759787	0.0319421	1.35143	0.0730689	1.15379	1.54906	0.0700856	0.0760522
1700010N08Rik	10.2514	-4.12896	0.0113054	0.0444929	1.22987	0.0670489	2.06174	0.398002	0.0643113	0.0697864
C430042M11Rik	39.216	-4.09521	9.47133e-07	1.30564e-05	3.77584	0.209093	4.16783	3.38386	0.362059	0.0561261
1700030C10Rik	53.1722	-4.07877	3.02939e-08	5.90523e-07	4.87192	0.273065	4.90906	4.83479	0.492669	0.0534611
Gm16348	19.7712	-4.07298	0.000276141	0.00195255	2.29373	0.130258	2.54398	2.04348	0.12494	0.135576
Ly6g6e	144.544	-4.04322	1.60222e-20	2.09032e-18	4.83808	0.27972	5.56269	4.11347	0.32461	0.23483
Pdzk1ip1	24.5401	-4.03489	8.4003e-05	0.000690319	3.4254	0.201237	3.85257	2.99823	0.0753622	0.327112
8030453O22Rik	24.1799	-4.03001	8.20054e-05	0.00067602	2.25004	0.132136	1.69925	2.80083	0.100572	0.163701
Gm31160	27.7729	-4.02209	6.18633e-05	0.000526814	1.61642	0.0940154	1.79212	1.44072	0.188031	0
Gm19470	41.9451	-3.9881	3.24629e-07	5.0038e-06	4.19196	0.251975	5.23575	3.14817	0.269765	0.234185
Gm9465	45.7385	-3.98299	1.58837e-07	2.63116e-06	3.09916	0.185932	3.57993	2.6184	0.29251	0.0793531
A330049N07Rik	14.12	-3.98284	0.00294051	0.0144854	1.11835	0.0678076	1.59377	0.642926	0.0427772	0.092838
Lama3	416.353	-3.95444	9.10242e-46	9.56281e-43	5.34808	0.329438	6.24277	4.45339	0.319603	0.339272
Atp8b3	247.085	-3.94412	3.17846e-30	1.19708e-27	8.74219	0.541422	7.91648	9.5679	0.708713	0.374132
Dnajb13	26.0703	-3.89068	4.88475e-05	0.000429725	3.35364	0.21516	3.68606	3.02122	0.278964	0.151356
Rnase6	213.75	-3.87524	7.94354e-06	8.71214e-05	13.5182	0.888356	14.8989	12.1375	1.44152	0.335194
Gm9732	36.8098	-3.80981	3.58409e-06	4.30546e-05	3.24911	0.220034	3.82535	2.67287	0.335921	0.104148
Gm21935	99.7329	-3.80167	3.0812e-14	1.63781e-12	1.67752	0.115021	1.92123	1.43381	0.100789	0.129254
Dnah1	450.383	-3.79716	4.84288e-48	6.44458e-45	5.42385	0.372424	4.98147	5.86622	0.452853	0.291995
Gm38870	20.8303	-3.77966	0.000448213	0.00296251	3.80176	0.26635	3.37061	4.23291	0.0997467	0.432954
Etv2	19.5965	-3.70531	0.000615866	0.00388046	2.08813	0.153238	2.52643	1.64984	0.116633	0.189844
Gm50598	61.8401	-3.68703	1.75197e-09	4.28041e-08	4.51805	0.335655	4.75285	4.28325	0.280276	0.391033
Caly	140.13	-3.66619	1.89246e-18	1.90785e-16	12.1992	0.917342	13.8512	10.5472	0.95439	0.880294
Gm38999	185.076	-3.64266	2.2012e-20	2.83472e-18	18.1973	1.38928	22.2846	14.1101	1.7254	1.05316
Gm41510	15.2172	-3.6135	0.00474124	0.0215826	1.2921	0.101626	1.17662	1.40757	0	0.203252
Gm2479	17.7577	-3.59406	0.001512	0.00838826	2.15871	0.169805	2.5461	1.77133	0.267139	0.0724704
Gm904	21.643	-3.58596	0.000385631	0.00259702	4.68519	0.372713	5.4723	3.89807	0.357495	0.38793
Defb20	10.6509	-3.57811	0.0129299	0.0495098	2.38208	0.190214	1.60264	3.16152	0.24662	0.133808
Blnk	89.2688	-3.5762	1.32689e-12	5.55265e-11	7.72997	0.618838	7.35972	8.10021	0.668073	0.569602
Plcxd3	30.9557	-3.57392	0.000234285	0.00169748	2.52213	0.20194	1.67195	3.37231	0.403879	0
Sdk2	170.867	-3.56487	4.96507e-22	7.80376e-20	2.08227	0.168162	2.07305	2.09149	0.161297	0.175028
Gm40694	23.7829	-3.55257	0.000743701	0.00455928	4.6154	0.373643	5.5499	3.68089	0.747287	0
Bdh2	14.2788	-3.54269	0.00440822	0.0203587	1.87482	0.154465	1.82416	1.92549	0.0725972	0.236333
Slc7a14	251.801	-3.52401	5.06093e-30	1.80395e-27	4.26385	0.353881	4.1267	4.401	0.392997	0.314764
Gm30504	29.9832	-3.52336	0.000235044	0.00170175	1.81375	0.150207	1.56177	2.06574	0.300414	0
Gm18962	23.3862	-3.50657	0.000453534	0.00299174	4.04204	0.33791	4.71089	3.3732	0.572313	0.103506
Gm12827	48.4521	-3.50495	2.89928e-07	4.52129e-06	2.4404	0.205894	2.46462	2.41619	0.139436	0.272352
Aspg	310.141	-3.50292	3.76546e-05	0.000342426	11.734	0.999295	12.8699	10.5981	1.58996	0.408629
Rsph4a	220.905	-3.49504	0.00906716	0.0370122	9.3248	0.8005	14.2393	4.41029	1.39864	0.202361
Gm36254	174.642	-3.49406	3.70093e-20	4.64618e-18	8.12355	0.687765	7.76013	8.48697	0.900767	0.474763
Gm12863	12.8621	-3.46423	0.0107042	0.0424869	3.68134	0.316886	3.02024	4.34244	0.633772	0
Kcnj15	357.664	-3.45435	1.65965e-32	7.88767e-30	4.65943	0.406329	3.72931	5.58955	0.412326	0.400331
Gm14322	33.3657	-3.45182	2.23298e-05	0.000216687	1.1554	0.101119	0.966945	1.34386	0.0769642	0.125275
Rasgrp3	35.6275	-3.43216	1.24955e-05	0.000129908	1.09997	0.0971307	1.29127	0.908665	0.119909	0.0743526
Adtrp	26.1004	-3.39911	0.000235931	0.00170755	1.15709	0.10516	1.15624	1.15794	0.0494243	0.160896
Dkk2	25.3417	-3.39542	0.000202282	0.00149657	1.02759	0.0931567	0.977735	1.07745	0.112843	0.07347
Ccdc180	159.906	-3.39394	1.74366e-19	2.01186e-17	4.7552	0.432405	4.69279	4.81762	0.397511	0.467298
Ssu2	46.9835	-3.38287	6.82599e-07	9.81654e-06	2.7643	0.252594	2.92274	2.60585	0.327498	0.177689
n-THgtg5	22.0007	-3.37765	0.00860177	0.0353647	46.4707	4.28693	2.04781	90.8936	4.72688	3.84697
Gm11844	15.8105	-3.36743	0.0037667	0.0178634	1.61418	0.149548	2.0711	1.15727	0.113825	0.185272
2410003I16Rik	155.754	-3.34474	1.74194e-17	1.51178e-15	6.44761	0.606556	7.17179	5.72344	0.485533	0.72758
Gm35787	14.8643	-3.3432	0.0080238	0.03343	5.09028	0.476928	5.28942	4.89114	0.953855	0
Pla2g5	711.573	-3.32602	8.87137e-41	7.69919e-38	37.208	3.55193	38.329	36.0871	4.82103	2.28282
Gm31294	23.9456	-3.32109	0.00044524	0.00294481	2.83861	0.27049	2.9259	2.75132	0.397279	0.1437
Gm7967	71.9454	-3.29882	1.53245e-09	3.79989e-08	16.9266	1.64218	18.7156	15.1376	1.71221	1.57214
Gm12864	11.7693	-3.29341	0.012882	0.0493611	1.45315	0.141178	1.31752	1.58877	0.207353	0.0750019
Gm10139	154.978	-3.27475	1.71799e-17	1.4975e-15	17.5585	1.73455	17.5763	17.5406	1.39899	2.07012
2400006E01Rik	227.831	-3.27202	1.68333e-24	3.69241e-22	32.6005	3.22356	35.6087	29.5922	3.05018	3.39695
Gm3912	11.8113	-3.26959	0.0123882	0.0479381	2.13553	0.211708	1.84743	2.42363	0.203064	0.220352
Smim22	156.041	-3.23964	3.71221e-18	3.54543e-16	49.396	4.99542	48.1193	50.6728	5.16199	4.82884
Tmem255a	35.7008	-3.21394	0.000300175	0.00209503	1.29794	0.133493	1.85629	0.739596	0.244846	0.0221409
Gm10769	17.222	-3.20455	0.00364644	0.0173715	3.05854	0.31734	3.81616	2.30092	0.200197	0.434482
Gm42377	50.2224	-3.19306	8.54391e-07	1.19346e-05	13.447	1.40267	15.4239	11.4701	1.65944	1.14591
Gm52262	207.226	-3.1735	5.16488e-18	4.86302e-16	25.1356	2.6623	24.6726	25.5986	3.76477	1.55983
4930412C18Rik	323.006	-3.17154	6.62984e-06	7.44309e-05	12.2665	1.31178	13.5406	10.9924	1.97221	0.651339
Olfr225	14.1168	-3.16116	0.00944561	0.0382597	1.68359	0.180315	1.75527	1.61191	0.0675269	0.293103
Ptpru	249.782	-3.15753	8.21963e-25	1.93026e-22	6.37463	0.682632	5.66605	7.0832	0.707348	0.657915
Tat	25.4505	-3.12964	0.00325282	0.0157596	1.18778	0.129189	1.65048	0.72509	0	0.258379
Nme8	26.2015	-3.11733	0.000601231	0.0038111	1.38692	0.152292	1.60884	1.16501	0.239589	0.0649964
Tpp1	255.06	-3.09658	0.000472673	0.00310261	10.1374	1.14542	10.3808	9.894	1.85014	0.440703
Marchf9	36.5194	-3.08896	3.34129e-05	0.000307778	2.73901	0.307155	2.76731	2.71071	0.383261	0.231049
Gm15753	171.172	-3.0863	2.0256e-16	1.46496e-14	19.4754	2.18969	19.7598	19.1911	2.9072	1.47219
Gfi1b	17.8709	-3.083	0.00466346	0.0212771	1.47104	0.165431	1.49708	1.44499	0.280189	0.0506736
Slc11a1	31.4286	-3.07705	0.000122466	0.000969286	1.82607	0.206853	1.5472	2.10494	0.198408	0.215299
Gm46614	51.0314	-3.06877	2.24586e-05	0.000217725	25.1192	2.85889	19.951	30.2875	0.842415	4.87537
Gm20599	228.19	-3.06708	3.42305e-23	6.38574e-21	32.5624	3.71046	34.1172	31.0077	3.89697	3.52394
Mmel1	77.5748	-3.06517	4.3486e-08	8.22772e-07	3.94353	0.450576	2.58539	5.30167	0.492484	0.408667
Sec14l2	43.3843	-3.05427	8.40357e-06	9.14997e-05	2.56338	0.294561	2.39033	2.73644	0.370076	0.219045
Acan	51.9859	-3.04518	1.93909e-06	2.48435e-05	1.00305	0.116221	0.935113	1.07099	0.0770887	0.155353
Gm5751	14.7657	-3.02058	0.0109462	0.0432581	4.40359	0.517747	3.39118	5.416	0.850839	0.184655
Prss38	52.9657	-3.01937	8.33841e-07	1.16638e-05	3.17929	0.374536	3.26726	3.09133	0.377084	0.371988
Wdr95	32.2628	-3.01522	0.000147911	0.00114569	1.23651	0.14597	1.11871	1.35431	0.196953	0.094987
Gm19554	33.6622	-3.00118	0.000514427	0.0033296	1.86773	0.22292	2.08438	1.65108	0.411492	0.034348
Lypd10	144.331	-2.99199	3.56414e-13	1.64832e-11	15.8571	1.90316	18.3351	13.379	2.5117	1.29463
Nlrp4f	2539.06	-2.99121	9.44491e-84	4.71325e-80	107.065	12.8819	115.191	98.9385	15.0049	10.7589
Rasgef1c	56.3675	-2.98973	7.15855e-07	1.02351e-05	2.61291	0.31404	2.45891	2.7669	0.397836	0.230243
Gm14403	26.3767	-2.96681	0.00163174	0.0089199	1.05765	0.128994	1.60868	0.506616	0.18337	0.074618
Gm12865	291.274	-2.95976	2.53251e-24	5.26578e-22	19.6489	2.41334	18.8075	20.4903	2.97929	1.84739
Gm30121	46.3854	-2.93792	1.44111e-05	0.000147216	10.3252	1.28822	9.54823	11.1021	0.768831	1.80761
Nrg4	117.542	-2.93282	8.00058e-12	2.96288e-10	5.24206	0.656138	4.4255	6.05863	0.615992	0.696285
Spaca9	52.9764	-2.92838	2.40591e-06	3.0185e-05	11.6647	1.46499	10.4374	12.892	1.14121	1.78876
Tspyl5	163.122	-2.92769	2.06811e-14	1.14037e-12	6.01114	0.755015	4.85468	7.1676	0.65792	0.852111
Gm41304	217.768	-2.91444	4.0799e-18	3.85966e-16	10.9924	1.39376	9.52054	12.4642	1.71505	1.07247
Sectm1a	22.57	-2.9112	0.00642274	0.027792	1.47464	0.187575	1.75527	1.194	0.37515	0
Plpp2	68.947	-2.90865	8.647e-07	1.20701e-05	6.17694	0.786184	6.3853	5.96858	1.23683	0.335532
4930570E01Rik	103.382	-2.90072	4.88325e-11	1.57217e-09	11.9201	1.52463	12.4981	11.3421	1.46238	1.58688
Dyrk4	68.2533	-2.89813	2.07953e-06	2.64828e-05	3.53082	0.453051	3.61252	3.44911	0.744521	0.161581
Lypd11	34.5226	-2.88971	0.000136617	0.00107068	2.76529	0.35607	3.00005	2.53054	0.46166	0.250481
Cd2	46.6453	-2.87478	1.91492e-05	0.000190357	3.00306	0.390865	3.73761	2.2685	0.297496	0.484234
Slc35f3	282.261	-2.87047	2.38137e-24	5.05686e-22	3.51884	0.459747	3.24056	3.79711	0.49723	0.422265
Tnfrsf26	167.981	-2.8654	1.20589e-11	4.29067e-10	8.31	1.09245	7.75101	8.869	1.65766	0.52723
Noxred1	31.7926	-2.86467	0.00027419	0.00194358	3.31743	0.434629	3.81137	2.8235	0.54232	0.326938
Dnmt3l	51.0365	-2.86297	4.49567e-05	0.000400259	2.8171	0.370536	2.78871	2.84549	0.637333	0.103739
Smarcd3	85.8021	-2.85441	1.53236e-08	3.16969e-07	3.19727	0.421994	3.86239	2.53216	0.516835	0.327153
Gm40988	22.1835	-2.84937	0.00331144	0.0160009	6.15537	0.814808	7.63591	4.67483	1.28187	0.347749
Gm34157	24.0907	-2.81703	0.00180856	0.00971494	2.59203	0.351046	2.70239	2.48167	0.499026	0.203066
Akr1c12	53.2377	-2.80648	0.000124011	0.00098035	6.34608	0.869856	6.88704	5.80513	1.58971	0.150004
Tmc5	38.2996	-2.80186	0.000234615	0.00169925	1.10421	0.151039	1.43783	0.770599	0.08381	0.218268
Ifi27l2a	17.6369	-2.79554	0.00750172	0.0316512	2.91779	0.401838	2.08724	3.74834	0.385431	0.418244
Srgn	53.6099	-2.7824	9.15071e-06	9.84145e-05	2.09615	0.290917	2.36349	1.82881	0.409167	0.172667
Mfng	147.418	-2.77874	8.0876e-14	4.06641e-12	6.72182	0.935377	7.1536	6.29004	1.03534	0.835411
1700010I14Rik	33.6868	-2.77701	0.000902026	0.00538437	2.49235	0.348135	1.97734	3.00737	0.602821	0.0934487
Gja5	23.6433	-2.77346	0.00208586	0.0109511	1.08697	0.151713	1.27505	0.898883	0.187292	0.116135
Dennd3	123.215	-2.76876	3.72478e-10	1.03987e-08	3.31584	0.465336	3.09719	3.53449	0.658471	0.272202
Lurap1l	29.7892	-2.76801	0.000662381	0.00413052	2.56223	0.359078	2.73363	2.39082	0.500788	0.217369
3300002P13Rik	15.0653	-2.76601	0.0125739	0.0484159	1.00643	0.141327	0.945144	1.06772	0.155831	0.126823
Fcer1g	181.639	-2.7645	3.64872e-15	2.24098e-13	40.3078	5.66617	43.919	36.6966	6.98257	4.34977
Gm5750	25.3651	-2.76351	0.00245803	0.0125261	4.31907	0.606948	5.83591	2.80223	0.89145	0.322447
Ddah2	929.836	-2.76012	6.45564e-34	3.79003e-31	22.367	3.16573	20.9503	23.7838	4.15386	2.1776
Gm13544	32.181	-2.7556	0.000310605	0.00215427	1.59557	0.225674	1.60482	1.58632	0.231521	0.219827
Gm41159	25.2599	-2.75538	0.00183577	0.00983463	2.65041	0.374816	2.59694	2.70389	0.550507	0.199124
Gm21029	54.7436	-2.75389	1.22676e-05	0.000127871	7.1716	1.01657	5.89505	8.44815	1.45247	0.580675
Nxnl1	33.7366	-2.74895	0.000306395	0.00212803	1.77039	0.251541	1.64533	1.89545	0.336905	0.166176
Gm9866	29.6665	-2.74045	0.000566348	0.0036164	2.06965	0.295792	2.04879	2.09051	0.326148	0.265436
Dgka	954.984	-2.72798	3.59054e-56	7.16707e-53	40.3878	5.82336	37.9009	42.8747	5.81749	5.82922
Padi4	145.433	-2.72143	5.14621e-12	1.98691e-10	3.97951	0.576426	4.46459	3.49443	0.736103	0.416749
Gm11413	34.0671	-2.70853	0.00180442	0.0096979	3.391	0.497491	3.2294	3.55259	0.931788	0.0631946
Xlr3d-ps	81.0166	-2.69893	4.32487e-08	8.19836e-07	1.32137	0.194457	1.16978	1.47296	0.191501	0.197414
Col6a2	128.653	-2.6981	6.56868e-08	1.19524e-06	3.10464	0.459349	2.80714	3.40214	0.749825	0.168873
Efcab10	238.412	-2.69123	4.82637e-13	2.19953e-11	49.1512	7.29009	57.6994	40.6029	10.5146	4.06555
Fbxw13	28.481	-2.67304	0.00106297	0.00621679	2.77748	0.415702	3.32614	2.22881	0.458364	0.37304
B230311B06Rik	88.6913	-2.67081	2.62896e-08	5.19057e-07	15.716	2.35762	16.3324	15.0997	3.02011	1.69512
Dgkk	966.338	-2.67025	8.06229e-38	5.96042e-35	9.75985	1.46747	8.03557	11.4841	1.67053	1.2644
Col6a4	113.216	-2.65709	1.40945e-10	4.1804e-09	2.1394	0.324024	2.05451	2.22429	0.333968	0.31408
Plekhb1	145.812	-2.64927	1.91542e-12	7.85084e-11	8.84586	1.3469	9.31965	8.37207	1.60805	1.08575
Gm4371	96.6922	-2.64897	2.79739e-09	6.59253e-08	8.66899	1.32007	8.97476	8.36322	1.32118	1.31896
9430018G01Rik	550.938	-2.64529	1.83169e-28	5.80354e-26	19.4305	2.96967	22.0714	16.7895	3.59451	2.34482
Arhgap9	288.509	-2.64095	6.17303e-22	9.55193e-20	11.6923	1.78998	12.7563	10.6283	1.8164	1.76356
Ttc12	339.948	-2.63451	2.37817e-19	2.69917e-17	13.0332	2.00876	13.7725	12.2938	2.66806	1.34946
Gm20756	38.6783	-2.60827	0.000318664	0.00220404	3.5603	0.557552	4.38088	2.73973	0.761134	0.353971
Gm15762	40.0464	-2.59476	0.000464996	0.00306128	3.44361	0.545802	2.42794	4.45929	0.815175	0.276429
1810020O05Rik	40.256	-2.58148	0.000408252	0.00273277	1.59492	0.254302	2.23582	0.954019	0.30496	0.203645
Gm36297	18.712	-2.56776	0.0118778	0.0463616	2.272	0.366353	2.05995	2.48406	0.576352	0.156355
Cd86	34.1949	-2.56447	0.000654029	0.00408354	1.42139	0.229373	1.7741	1.06868	0.271361	0.187385
Cnih2	68.0008	-2.5458	1.63981e-05	0.000165398	7.08998	1.15642	7.91601	6.26395	0.559354	1.75348
Cacng6	142.935	-2.54085	4.98409e-10	1.35541e-08	4.98859	0.820476	4.50178	5.47539	1.12226	0.518693
Kcnk2	87.4797	-2.53845	8.40691e-06	9.14997e-05	2.37998	0.38983	1.88668	2.87327	0.162498	0.617161
Gm41031	61.3102	-2.53604	1.36785e-05	0.000140451	7.14479	1.17663	8.77204	5.51753	1.52555	0.827711
Gm41834	44.0066	-2.52685	0.000214026	0.00156879	5.79399	0.961048	6.31896	5.26903	1.41153	0.510566
Kdr	201.399	-2.5138	2.65989e-15	1.66962e-13	3.73156	0.624194	3.86341	3.59971	0.708111	0.540277
Plvap	3037.5	-2.49966	9.55152e-96	6.35526e-92	203.356	34.3572	199.991	206.72	35.8522	32.8623
Plpp7	28.972	-2.48497	0.00270098	0.0135599	1.98273	0.338833	1.28025	2.68521	0.410439	0.267228
Ifi27	255.199	-2.4827	9.8692e-17	7.49046e-15	27.4032	4.68806	24.5923	30.2141	5.53496	3.84115
Cutal	35.7113	-2.48168	0.000986789	0.00581041	2.15661	0.369451	1.78661	2.5266	0.542627	0.196274
Platr3	53.96	-2.47018	3.2172e-05	0.00029883	18.1465	3.1273	20.9634	15.3297	3.62917	2.62542
Rasl10b	29.5231	-2.45825	0.00298357	0.0146615	1.00722	0.174827	0.961117	1.05333	0.082167	0.267486
Muc1	37.5835	-2.44965	0.000438276	0.00290527	2.37109	0.414444	2.62938	2.1128	0.417264	0.411624
Fkbp11	171.686	-2.44412	1.1634e-12	4.92006e-11	25.6668	4.50761	25.0933	26.2403	5.3065	3.70871
Bpifb4	31.748	-2.43011	0.00205949	0.0108612	2.06375	0.365393	2.81327	1.31423	0.39119	0.339595
B3gnt5	131.197	-2.42709	1.25754e-07	2.12368e-06	3.44672	0.610844	4.8517	2.04173	0.569441	0.652248
Gm36899	31.3585	-2.42604	0.00157585	0.00866542	3.28088	0.583323	3.38572	3.17605	0.756301	0.410344
Ccdc106	529.587	-2.42532	8.22164e-26	2.15937e-23	26.5524	4.73004	24.1546	28.9502	5.65412	3.80596
Rec8	476.376	-2.42478	9.7426e-30	3.41179e-27	28.1531	5.00776	28.2593	28.0469	5.0259	4.98962
Lamb2	436.427	-2.42017	0.00372911	0.0177062	10.9123	1.97162	10.4326	11.3921	3.10823	0.835023
Slc26a10	53.5033	-2.41819	7.34406e-05	0.000614911	1.77652	0.317309	1.54782	2.00522	0.220789	0.413829
Plekhs1	22.9606	-2.41738	0.0062501	0.0271745	1.03095	0.184262	1.12731	0.934587	0.162633	0.205891
Lhb	30.5491	-2.41047	0.00380096	0.0179917	1.3715	0.246938	1.54709	1.1959	0.405806	0.0880706
Dnaaf3	148.409	-2.4044	6.29143e-11	1.98708e-09	9.25068	1.66807	10.443	8.05834	1.61957	1.71658
Celf3	104.612	-2.40109	2.54019e-08	5.04526e-07	1.4638	0.264556	1.65633	1.27128	0.253755	0.275357
A2ml1	270.461	-2.39439	9.91903e-17	7.49977e-15	8.0932	1.4718	7.13988	9.04653	1.66618	1.27741
Gm45966	47.6299	-2.38749	0.00016014	0.0012285	10.8757	1.98664	11.2497	10.5018	2.62434	1.34894
Catsperd	91.1257	-2.38563	1.72838e-06	2.24904e-05	2.95722	0.541881	2.82431	3.09014	0.78545	0.298311
Gm31126	111.032	-2.38188	2.49948e-08	4.9892e-07	2.69207	0.49385	2.27912	3.10503	0.573104	0.414596
LOC115487155	102.425	-2.37832	7.81613e-08	1.38682e-06	2.10588	0.386505	2.18289	2.02886	0.299328	0.473682
Iqub	232.808	-2.36798	2.45313e-13	1.15217e-11	8.16917	1.51297	9.41789	6.92045	1.87185	1.15409
Gm11346	50.6861	-2.36797	0.000302433	0.00210637	6.36171	1.17363	7.39855	5.32488	0.60992	1.73734
Myo18b	60.5108	-2.3651	2.6771e-05	0.000254344	1.00311	0.186123	1.0106	0.995615	0.241316	0.13093
Gm8488	34.3049	-2.35701	0.00129307	0.00732644	2.16804	0.403929	2.29754	2.03854	0.30744	0.500419
Cfap54	107.257	-2.35644	4.18957e-07	6.30679e-06	1.27533	0.238422	0.920811	1.62985	0.296409	0.180434
Spag8	212.493	-2.35414	2.524e-14	1.37654e-12	17.8521	3.33502	19.4143	16.2899	3.62385	3.04619
Smarca5	2253.45	-2.35045	2.81957e-57	6.25348e-54	67.9873	12.7167	75.1515	60.8232	12.1784	13.255
Rasgrp2	1917.34	-2.34987	8.92212e-69	2.54421e-65	24.0527	4.50526	23.7936	24.3118	4.44838	4.56214
Parp3	123.575	-2.34817	1.26832e-07	2.14006e-06	5.23302	0.982282	3.50947	6.95658	0.928751	1.03581
Gm8914	35.2722	-2.34017	0.00121606	0.00695524	2.8885	0.545219	2.29163	3.48537	0.548928	0.541509
Dalrd3	375.327	-2.33451	4.47572e-23	8.25313e-21	11.9368	2.26012	12.1218	11.7519	2.22834	2.29189
Dusp8	330.231	-2.33449	5.15662e-11	1.65219e-09	8.65852	1.64241	12.0175	5.29953	2.05655	1.22826
Gm2560	178.354	-2.32774	2.02564e-11	6.97135e-10	27.622	5.25834	30.976	24.2679	6.31998	4.1967
2310039L15Rik	60.4358	-2.32712	6.6655e-05	0.000563532	13.156	2.50821	14.0093	12.3027	3.5783	1.43812
Rasal3	291.137	-2.32439	1.48161e-17	1.3086e-15	9.42087	1.79814	8.72137	10.1204	2.03286	1.56342
Gm19448	104.834	-2.32231	4.03676e-07	6.10437e-06	31.1769	5.96747	25.4645	36.8894	7.80087	4.13406
Wfdc9	78.6858	-2.3222	3.32064e-06	4.02693e-05	13.029	2.49106	13.0302	13.0278	3.22976	1.75236
Scd3	224.55	-2.31814	1.52163e-09	3.77777e-08	9.03079	1.73857	9.39043	8.67116	2.59911	0.878041
Stk32b	27.0176	-2.31545	0.0056045	0.0248052	1.09294	0.209451	1.11439	1.07148	0.123668	0.295233
Cda	256.478	-2.29642	2.39862e-14	1.31535e-12	25.0684	4.86636	26.5438	23.5929	3.88921	5.8435
BC052688	168.862	-2.29544	1.16002e-11	4.14226e-10	14.4748	2.81537	15.4078	13.5419	2.72772	2.90302
Serpinb2	118.291	-2.29199	5.61264e-08	1.03543e-06	7.38441	1.44037	8.89682	5.872	1.67954	1.20121
Dennd1c	90.8219	-2.28973	6.2842e-06	7.12721e-05	3.31084	0.648911	3.07252	3.54915	0.959006	0.338816
Scd1	67.846	-2.2796	5.15252e-05	0.000450107	1.94491	0.381565	2.19472	1.69511	0.228673	0.534456
Syt5	118.433	-2.27868	1.80694e-07	2.95158e-06	9.17821	1.80223	10.7081	7.6483	1.28339	2.32108
Got1l1	254.234	-2.27568	4.74168e-14	2.43313e-12	21.8033	4.30816	20.6401	22.9665	5.36376	3.25257
Prtn3	137.342	-2.26691	2.00828e-07	3.26178e-06	19.579	3.90092	15.2448	23.9133	5.42716	2.37467
Cass4	69.4114	-2.26187	1.05363e-05	0.000111514	2.39453	0.476721	2.3704	2.41866	0.424147	0.529294
Pnmal1	45.8285	-2.25903	0.0028603	0.0141744	1.36685	0.272752	2.2167	0.516992	0.347207	0.198298
Cfap61	383.773	-2.25892	6.56021e-18	6.00681e-16	10.2046	2.0389	11.4593	8.94988	2.46549	1.61232
n-TSgct6	22.314	-2.25727	0.0106772	0.0424049	37.6762	7.52826	38.6587	36.6938	8.30087	6.75566
Hipk4	22.4194	-2.25336	0.0118653	0.0463398	1.14222	0.22896	0.869867	1.41458	0.219612	0.238308
Gm40557	76.6253	-2.24837	5.2241e-06	6.05213e-05	4.10889	0.825489	4.65939	3.5584	0.791785	0.859192
Ogdhl	147.021	-2.24653	4.94036e-10	1.34535e-08	5.40673	1.08884	5.39184	5.42161	1.24458	0.933096
Parp10	226.835	-2.24165	1.69766e-12	6.98701e-11	9.22715	1.8663	7.73041	10.7239	2.15529	1.57732
LOC115488129	246.617	-2.24158	4.68555e-14	2.41052e-12	35.4014	7.1576	36.7458	34.057	8.65859	5.65661
Ceacam20	52.5498	-2.24129	0.0013215	0.00745368	2.44331	0.491228	1.89093	2.99569	0.172293	0.810162
Afap1	246.872	-2.23886	9.43701e-11	2.88472e-09	4.95813	1.00665	5.56791	4.34836	1.39644	0.616857
Spon1	414.077	-2.23675	1.36342e-22	2.3873e-20	9.27393	1.88034	9.36162	9.18624	2.08363	1.67705
Aldoc	2841.03	-2.22686	7.12851e-42	6.46783e-39	136.408	27.9266	143.003	129.813	33.9684	21.8848
Gm30866	42.7011	-2.22271	0.00060798	0.0038406	1.91401	0.391461	1.94319	1.88484	0.332251	0.45067
Dusp1	5254.72	-2.21976	5.33724e-08	9.88281e-07	373.214	76.3131	476.72	269.708	72.4221	80.204
Gm7896	182.978	-2.21353	4.56295e-11	1.47859e-09	2.5192	0.518964	2.82863	2.20977	0.595111	0.442817
Plcb2	128.438	-2.21288	6.9855e-09	1.53228e-07	2.12651	0.437935	2.21705	2.03597	0.409402	0.466468
Cpvl	37.9257	-2.20869	0.00411792	0.0192546	2.13035	0.438553	3.18697	1.07373	0.312298	0.564808
Fxyd1	25.6701	-2.20715	0.0123599	0.0478781	1.99087	0.4131	1.94986	2.03189	0.670329	0.155871
Gm2832	38.4259	-2.20536	0.0012792	0.0072561	2.47345	0.512696	2.4137	2.53321	0.636736	0.388656
Prame	54.7341	-2.19608	0.000219054	0.00159991	3.25071	0.678769	3.05712	3.4443	0.918833	0.438704
Baiap3	107.736	-2.19062	3.40892e-06	4.12147e-05	2.46379	0.51721	1.7813	3.14627	0.680558	0.353863
Klc3	664.64	-2.18877	1.68172e-23	3.25911e-21	37.0605	7.78185	39.0905	35.0304	9.60346	5.96023
Ndst4	84.8695	-2.18721	2.45327e-06	3.0702e-05	1.63721	0.343205	1.75157	1.52285	0.322967	0.363442
Trim61	92.3208	-2.18667	6.45539e-05	0.000547392	5.6926	1.20118	6.01941	5.36579	1.94674	0.455631
Htr7	49.2378	-2.18449	0.00168139	0.00914289	1.79468	0.375225	1.74686	1.84251	0.135917	0.614532
Slc25a23	65.0449	-2.17974	5.35356e-05	0.000464866	2.3255	0.490656	2.53483	2.11618	0.620565	0.360748
Lrrc74b	98.6348	-2.17889	6.95371e-07	9.97865e-06	3.45454	0.729443	3.22001	3.68906	0.869312	0.589574
Nat14	135.686	-2.17506	2.51513e-08	5.00544e-07	8.82741	1.86957	9.19767	8.45716	2.38138	1.35776
Gm41609	32.7637	-2.17419	0.00521341	0.0233539	1.81975	0.385935	2.08758	1.55192	0.585124	0.186746
Zfp551	171.907	-2.16862	2.56268e-08	5.0778e-07	4.54114	0.968375	3.71237	5.36991	1.31328	0.623472
Plekhg6	32.6205	-2.1661	0.00520013	0.0233205	1.08246	0.231	1.01746	1.14746	0.350224	0.111776
Armh1	23.8952	-2.16318	0.0124966	0.0482019	1.61667	0.345076	1.74747	1.48587	0.462184	0.227969
Ccdc113	89.5081	-2.16189	9.60998e-06	0.000102855	7.17602	1.53384	8.498	5.85405	2.04122	1.02646
P2rx6	65.9517	-2.15997	5.66103e-05	0.000489177	3.80665	0.812619	3.79974	3.81355	0.61108	1.01416
1700021F07Rik	86.653	-2.15239	3.58826e-06	4.30699e-05	18.4774	3.97365	17.8265	19.1283	4.7785	3.1688
Gfpt2	1870.69	-2.15143	3.46626e-46	3.84389e-43	85.6024	18.3793	93.9168	77.288	17.4955	19.2632
Dusp26	379.534	-2.15094	5.97671e-20	7.36426e-18	25.4698	5.4803	25.8531	25.0864	6.01772	4.94287
A630023A22Rik	31.9201	-2.15005	0.00387845	0.0182939	3.25577	0.700181	3.25079	3.26076	0.572313	0.828048
Nphp3	114.545	-2.14259	1.18171e-07	2.0058e-06	2.43185	0.525686	2.59275	2.27095	0.476661	0.574711
1700019A02Rik	49.3888	-2.14243	0.000327639	0.00225285	6.29843	1.36281	6.26975	6.32711	1.43132	1.29431
Spag6l	103.358	-2.14039	2.81541e-05	0.000265087	5.72845	1.24688	6.60681	4.8501	1.93216	0.561602
Nkx2-3	56.5989	-2.13952	0.000165316	0.00126383	3.65434	0.79287	3.14153	4.16714	0.886291	0.69945
Gm40232	32.3963	-2.13767	0.00449167	0.0206491	2.05037	0.445447	2.323	1.77773	0.591408	0.299486
Ly6g6c	34.6467	-2.13121	0.00651418	0.0281267	1.2316	0.26966	1.20949	1.2537	0.443145	0.0961743
Tm4sf5	161.171	-2.13115	3.97542e-10	1.10366e-08	11.2609	2.45461	11.682	10.8397	2.3998	2.50941
Acy3	771.765	-2.12612	8.63526e-21	1.15684e-18	81.6572	17.8048	77.5047	85.8096	13.497	22.1126
5930403N24Rik	100.538	-2.12331	6.51709e-07	9.39261e-06	4.42495	0.970105	4.76543	4.08447	1.04499	0.895223
Fgd2	63.9656	-2.12202	6.21918e-05	0.000529161	1.77182	0.388557	1.92068	1.62295	0.36368	0.413434
Slc6a6	1930.15	-2.12022	3.83205e-33	2.06734e-30	40.6898	8.96886	43.1801	38.1995	11.0028	6.93492
Slc7a9	88.1535	-2.11915	3.58483e-06	4.30546e-05	5.23351	1.15159	4.95335	5.51368	1.3364	0.966779
Gm15097	27.8848	-2.11366	0.00748619	0.0316074	1.75141	0.386552	1.94003	1.56279	0.432097	0.341006
Gm41533	258.336	-2.11037	4.56565e-10	1.25185e-08	35.502	7.88216	39.2435	31.7605	10.9148	4.84952
Cyp4f16	759.122	-2.10488	2.9818e-31	1.29391e-28	44.6897	9.91987	47.7414	41.638	9.99469	9.84505
Ppm1j	1001.76	-2.09867	4.96934e-23	9.01755e-21	56.9347	12.6484	55.9552	57.9142	9.66376	15.633
Dagla	205.442	-2.09506	1.19765e-06	1.62407e-05	4.46363	1.00019	2.22501	6.70226	1.05177	0.948619
Capsl	212.786	-2.09357	6.8083e-12	2.55452e-10	24.6263	5.50973	27.1737	22.0789	5.66258	5.35688
Eomes	173.583	-2.09263	1.63492e-10	4.81337e-09	6.32869	1.41714	6.34502	6.31236	1.41883	1.41545
9930012K11Rik	122.312	-2.09178	4.70161e-06	5.49145e-05	8.33409	1.86046	7.31273	9.35544	1.07105	2.64988
Mpped1	167.584	-2.08961	1.15702e-09	2.93832e-08	2.72862	0.611955	3.09016	2.36707	0.602925	0.620986
Arhgef25	146.381	-2.08881	4.30337e-09	9.80589e-08	6.20205	1.39296	6.3374	6.06669	1.51603	1.2699
Ankrd34a	31.4771	-2.08674	0.00911571	0.0371568	1.21859	0.274886	0.737845	1.69933	0.364958	0.184813
Gm42081	488.966	-2.079	1.64256e-19	1.92865e-17	37.5379	8.49688	40.7055	34.3703	10.0326	6.96119
2810429I04Rik	29.8146	-2.07879	0.0104727	0.0417755	2.31853	0.525926	1.56764	3.06942	0.733482	0.31837
Gm39109	421.259	-2.07539	2.58548e-17	2.14144e-15	21.4229	4.86458	21.2769	21.5688	5.94724	3.78192
Gm20005	53.7098	-2.07332	0.000311721	0.00216051	10.5357	2.38968	10.6997	10.3717	2.09931	2.68004
Ahsg	116.086	-2.07151	2.94229e-07	4.57763e-06	10.3644	2.35736	9.25167	11.4771	2.64131	2.0734
Mycl	502.208	-2.07124	5.96713e-17	4.7079e-15	17.3987	3.94737	14.9788	19.8187	3.25231	4.64242
Gm42346	351.476	-2.06997	2.73143e-13	1.27686e-11	25.0131	5.70615	26.7196	23.3066	7.42974	3.98256
Acaa1b	376.726	-2.06842	9.86423e-18	8.9095e-16	18.8174	4.28888	17.2788	20.3559	4.68669	3.89106
Serpinb10	75.882	-2.0597	8.57313e-05	0.000703363	1.9289	0.442792	2.23146	1.62635	0.607856	0.277728
Gm32743	48.5561	-2.05634	0.000591687	0.00375658	4.06658	0.933814	4.16427	3.9689	0.950658	0.916969
Avil	35.2498	-2.05312	0.00706491	0.0301193	1.09194	0.252045	0.627198	1.55668	0.313024	0.191066
Tlcd5	48.2594	-2.05012	0.00282108	0.0140423	1.39692	0.323837	1.37487	1.41898	0.528925	0.118749
Ddr1	689.879	-2.04255	4.45274e-17	3.58392e-15	4.63859	1.08034	4.3242	4.95299	1.41863	0.742048
Mageb7-ps	578.406	-2.04137	5.70116e-23	1.01608e-20	74.8498	17.3841	79.1742	70.5254	19.7794	14.9888
Pcdh1	104.561	-2.03655	1.87959e-06	2.4161e-05	1.5665	0.364887	1.31425	1.81875	0.369724	0.360051
Smkr-ps	991.961	-2.02901	4.91996e-30	1.78559e-27	201.299	47.112	178.067	224.531	46.5262	47.6978
Fbxo32	3113.07	-2.02657	6.82517e-55	1.23852e-51	30.1585	7.0812	30.292	30.0249	7.90608	6.25632
Ldhc	75.0526	-2.01904	0.000216161	0.00158225	6.88672	1.62928	6.94439	6.82905	2.43927	0.819287
Syn1	168.297	-2.0174	4.58522e-07	6.85071e-06	7.03236	1.66692	6.03445	8.03027	2.35682	0.977009
Gm36028	256.27	-2.01731	2.28925e-13	1.08541e-11	7.68668	1.81295	7.95873	7.41462	1.76862	1.85728
Hspa1a	800.772	-2.0162	1.28085e-24	2.88018e-22	9.62778	2.27669	8.366	10.8896	2.5092	2.04418
Dmrt2	561.488	-2.01511	3.8704e-19	4.29205e-17	30.6855	7.2571	35.2254	26.1456	8.27638	6.23783
Lrriq4	177.053	-2.01288	1.80929e-09	4.4043e-08	7.04569	1.66671	8.02363	6.06775	1.69058	1.64284
Pnpla1	158.358	-2.01225	5.02976e-09	1.12808e-07	2.27875	0.539851	2.13593	2.42158	0.58433	0.495372
4921536K21Rik	38.9579	-2.0112	0.00829801	0.0343573	1.86113	0.438526	1.84237	1.87989	0.151881	0.72517
Slc17a7	41.9688	-2.00821	0.00182375	0.00978862	1.91233	0.453812	1.90572	1.91894	0.405161	0.502462
Rhpn1	632.879	-2.00557	4.12762e-26	1.1134e-23	35.0836	8.3494	34.2833	35.8839	8.90618	7.79263
Scd2	1554.18	-2.00372	1.95416e-28	6.09484e-26	38.1685	9.12029	34.0013	42.3358	10.8754	7.36519
2410141K09Rik	1055.69	-2.00161	1.43072e-32	6.96552e-30	46.7758	11.1724	46.9202	46.6314	12.6936	9.65116
Gm32728	38.1955	-2.00154	0.00461424	0.0210959	3.15387	0.753089	3.94692	2.36082	0.994827	0.511351
Atp4a	197.105	-2.00074	1.07236e-08	2.26753e-07	7.53939	1.79428	7.39953	7.67926	1.26519	2.32336
Egr3	90.4582	-1.99895	1.18082e-05	0.000123664	2.9298	0.701091	2.6571	3.2025	0.843841	0.558342
Fst	713.644	-1.98772	6.48672e-20	7.94365e-18	32.8947	7.89791	35.0932	30.6961	6.36882	9.42701
Gm40977	112.37	-1.98137	1.75464e-06	2.27726e-05	17.0622	4.12464	20.1058	14.0187	4.15751	4.09178
Npas2	45.172	-1.97224	0.00155166	0.00857021	1.3424	0.326527	1.49479	1.19001	0.303329	0.349725
Smad6	436.09	-1.97123	3.44933e-19	3.84648e-17	19.4059	4.72604	20.5396	18.2722	4.76947	4.6826
Gm46603	100.53	-1.96811	1.48426e-05	0.00015116	5.00719	1.22432	5.80417	4.2102	1.58739	0.861263
Lrrc55	323.769	-1.96223	7.36899e-10	1.96123e-08	7.06128	1.73951	7.06932	7.05324	2.43654	1.04248
Slc12a3	51.355	-1.96125	0.000801565	0.00486471	1.96226	0.481263	2.19874	1.72578	0.512407	0.450119
Wdr13	235.568	-1.95963	7.28294e-11	2.2786e-09	6.9907	1.71889	6.0818	7.8996	1.93502	1.50276
Pzp	52.0253	-1.95844	0.000994251	0.00584917	1.48037	0.364499	1.38591	1.57483	0.472587	0.25641
Myh14	393	-1.95758	1.54164e-17	1.34968e-15	7.42083	1.82483	7.8636	6.97807	1.89478	1.75487
Il3ra	60.7696	-1.9522	0.000260599	0.00186112	2.73985	0.676184	2.72486	2.75483	0.663591	0.688776
Slain1	263.057	-1.95215	7.52003e-12	2.80051e-10	11.6164	2.87169	11.5488	11.684	3.44515	2.29822
Gm8126	169.316	-1.9516	1.113e-08	2.35097e-07	10.3827	2.56364	11.8565	8.90882	2.74464	2.38264
Gm30062	54.5945	-1.95138	0.000775337	0.00471988	7.62841	1.88076	8.21709	7.03973	1.43149	2.33003
Fam205c	111.832	-1.94845	2.90247e-06	3.57852e-05	8.73605	2.16557	7.96986	9.50223	2.6495	1.68164
Cyp2d22	83.4332	-1.94266	4.44342e-05	0.000396669	4.0011	0.995606	4.14881	3.85338	1.25846	0.732757
Gm9805	163.944	-1.94102	2.50802e-07	3.98588e-06	7.07784	1.75588	8.58004	5.57564	1.41069	2.10108
A930024E05Rik	33.7911	-1.94048	0.00817152	0.0339321	2.36224	0.587686	1.7886	2.93589	0.49363	0.681742
Klf3	87.1513	-1.93751	3.28246e-05	0.000303479	2.16459	0.540589	2.21936	2.10982	0.684108	0.39707
D430019H16Rik	471.202	-1.93645	6.31842e-18	5.81207e-16	10.8001	2.6917	10.5625	11.0376	2.36753	3.01588
Zmynd10	43.5064	-1.93387	0.00337677	0.0162732	2.25378	0.561923	2.47851	2.02906	0.365881	0.757965
Slc44a4	328.477	-1.92933	3.53439e-15	2.18196e-13	4.60176	1.15405	4.75998	4.44354	1.19583	1.11226
Sulf1	819.166	-1.92924	1.70273e-25	4.19608e-23	16.1983	4.06882	16.1406	16.2561	4.69516	3.44248
Smyd1	36.8035	-1.92704	0.00529731	0.0236855	1.45188	0.365187	1.38186	1.5219	0.455671	0.274702
Ppp1r32	210.234	-1.92665	9.95013e-11	3.03228e-09	14.9499	3.75571	14.8392	15.0606	3.74497	3.76644
Slc39a4	156.98	-1.92573	2.44638e-07	3.89101e-06	5.36456	1.35213	5.32009	5.40903	1.77624	0.928033
Ncan	108.522	-1.92485	3.85725e-06	4.59121e-05	2.00232	0.503664	2.3086	1.69603	0.544726	0.462601
En1	63.2391	-1.92281	0.00290737	0.0143577	3.27108	0.81869	2.71331	3.82886	0.299826	1.33755
Spata19	66.2707	-1.91995	0.000209154	0.00153894	10.288	2.59557	11.5811	8.99493	2.59341	2.59772
Gm40985	90.9454	-1.90997	1.41819e-05	0.000145172	42.0334	10.6815	43.5625	40.5043	10.7099	10.6532
Kcnh2	102.785	-1.90247	2.66286e-05	0.000253232	2.62641	0.671151	1.91447	3.33835	0.626587	0.715716
Ddit4	2268.29	-1.89479	1.79669e-24	3.89824e-22	177.567	45.8267	175.225	179.909	58.1196	33.5337
As3mt	147.251	-1.89292	2.24742e-07	3.62072e-06	8.17394	2.09921	9.09487	7.25301	1.82707	2.37136
Gm34097	201.404	-1.89015	1.04891e-09	2.68772e-08	31.5414	8.12815	34.5842	28.4987	8.69028	7.56602
Samd7	77.1759	-1.88803	0.000736863	0.00452431	3.13296	0.812467	3.53644	2.72947	1.25585	0.369082
Zfp30	40.2342	-1.88632	0.004333	0.0200629	1.45789	0.376962	1.19723	1.71854	0.398136	0.355789
Glmp	70.885	-1.88348	0.000169114	0.00128884	6.07666	1.57416	6.42722	5.72609	1.82679	1.32154
Dio3	46.6293	-1.87923	0.0019928	0.0105625	3.28562	0.852826	3.59134	2.9799	0.865414	0.840238
Abca1	2873.59	-1.87864	1.10848e-46	1.30155e-43	35.9196	9.34195	33.8134	38.0257	10.1302	8.5537
Rsad2	99.3215	-1.87791	0.000551169	0.0035319	3.46093	0.904196	4.59662	2.32523	1.39371	0.41468
Mdk	71.7043	-1.87407	0.000885922	0.00530525	6.71828	1.75816	7.49796	5.9386	2.66265	0.853667
1700019E08Rik	101.2	-1.87162	1.2634e-05	0.00013121	20.9656	5.47513	23.4515	18.4798	6.29755	4.65272
Vill	183.988	-1.87023	4.10785e-09	9.41411e-08	6.94382	1.81422	7.38694	6.50069	1.90541	1.72302
Tril	287.687	-1.86779	9.67185e-08	1.67296e-06	7.04023	1.83735	4.87072	9.20975	1.36566	2.30905
Ccdc65	168.303	-1.86364	3.09124e-08	6.01992e-07	11.0043	2.89074	11.4123	10.5963	3.34576	2.43571
Oca2	46.9217	-1.86336	0.00292802	0.0144347	1.87001	0.491402	2.21231	1.5277	0.61898	0.363824
Slc22a18	36.056	-1.86316	0.00666721	0.0286943	2.64145	0.6934	2.51088	2.77201	0.665089	0.72171
Enpp3	32.1084	-1.86192	0.0105947	0.0421445	1.49619	0.393254	1.33562	1.65676	0.392927	0.39358
Ttc25	293.05	-1.84769	5.5299e-13	2.48609e-11	10.5465	2.79831	10.7573	10.3356	2.80573	2.79088
Palm3	162.775	-1.84586	3.60564e-08	6.91605e-07	4.75925	1.26484	4.52833	4.99018	1.29232	1.23736
Dlx2	50.4599	-1.84518	0.00255	0.0129189	2.66706	0.707513	2.44446	2.88966	0.481672	0.933354
Hmgcs1	12193.5	-1.83942	4.23966e-59	1.05785e-55	434.02	115.91	469.502	398.539	123.367	108.452
Ttyh2	1392.22	-1.83937	2.49967e-23	4.752e-21	52.662	14.0884	43.836	61.4881	15.7809	12.3958
Slc25a35	593.079	-1.83677	7.0339e-22	1.07178e-19	41.6252	11.1316	41.9851	41.2653	11.5089	10.7542
Mmrn2	68.167	-1.82991	0.000277255	0.00195974	2.26207	0.607733	2.19197	2.33218	0.605426	0.610041
Gm14267	39.5502	-1.82942	0.00761301	0.031999	2.3292	0.627617	2.42307	2.23533	0.881103	0.374132
Cpsf4l	172.558	-1.82704	4.68715e-08	8.75212e-07	12.4901	3.36488	13.4781	11.5021	3.86531	2.86445
6430710C18Rik	76.2344	-1.82225	0.000247735	0.00177559	4.8404	1.30735	5.87763	3.80317	1.44771	1.167
Gm9655	600.554	-1.81911	2.17719e-17	1.83371e-15	9.70148	2.62975	10.6776	8.72534	3.06504	2.19446
Nim1k	209.334	-1.81903	3.29766e-08	6.35987e-07	6.66055	1.80612	7.56438	5.75671	2.2396	1.37265
Rab25	148.267	-1.81792	1.65917e-05	0.000166844	18.2674	4.96896	21.4904	15.0445	7.06357	2.87434
A930027H12Rik	33.9524	-1.8161	0.0104916	0.0418345	3.23261	0.876068	3.60798	2.85724	0.807955	0.94418
Aldh6a1	585.56	-1.81084	1.43218e-16	1.05881e-14	20.3551	5.55263	21.729	18.9811	6.67236	4.4329
Tlr3	336.385	-1.80996	1.16749e-13	5.76836e-12	8.62913	2.34938	9.03361	8.22466	2.27963	2.41914
Postn	52.5352	-1.80975	0.00599346	0.0262589	2.01203	0.546923	3.03023	0.993835	0.524593	0.569253
Dnaic1	124.267	-1.80874	5.98395e-06	6.83328e-05	5.91407	1.61559	6.03125	5.7969	2.05096	1.18023
Nphs1	67.0447	-1.80311	0.000802747	0.00486942	1.45449	0.397038	1.47713	1.43185	0.269927	0.524149
Hspa1b	431.875	-1.79809	4.98233e-15	3.0046e-13	5.00754	1.37696	4.53851	5.47657	1.51827	1.23564
Gimap9	96.5817	-1.79552	2.38049e-05	0.000229439	7.57234	2.08345	7.56343	7.58124	2.10527	2.06162
Pabpc1l	70.2822	-1.79488	0.000470065	0.00308853	2.80275	0.771369	3.39104	2.21446	0.834923	0.707815
Gm14325	68.7211	-1.78778	0.000427238	0.00284554	2.03109	0.561964	2.28177	1.78041	0.619637	0.504291
Elapor1	403.838	-1.7877	1.08933e-15	7.12919e-14	7.96276	2.20308	8.14271	7.7828	2.28804	2.11811
Ramp3	458.448	-1.78534	3.72181e-17	3.01996e-15	42.5387	11.791	41.8703	43.2071	12.3548	11.2272
Flnc	317.827	-1.7832	6.073e-12	2.30462e-10	4.49587	1.24927	4.11752	4.87423	1.41079	1.08774
Epas1	609.771	-1.77229	8.70195e-18	7.89543e-16	14.4834	4.05636	15.0065	13.9602	4.74335	3.36936
Gm33616	48.4125	-1.76971	0.0108561	0.04297	8.51014	2.39779	10.0892	6.93105	3.91985	0.875734
Gm2058	89.881	-1.76541	0.000101124	0.000815897	3.92598	1.10281	4.62779	3.22418	1.17733	1.02828
Gm6329	227.782	-1.76515	3.24108e-06	3.94483e-05	34.2042	9.67317	34.637	33.7715	14.3123	5.03409
Nid1	2254.5	-1.76403	1.51314e-38	1.16168e-35	48.1921	13.551	44.6766	51.7075	13.4958	13.6063
Tekt1	120.107	-1.76354	1.62602e-05	0.000164256	9.45035	2.66319	10.4868	8.41392	3.36198	1.96441
Tsku	82.3345	-1.76336	0.000411486	0.00275349	3.36299	0.949441	3.18807	3.53792	1.31601	0.582875
Scn2a	157.694	-1.76137	0.00013086	0.00103001	2.22667	0.632412	2.22861	2.22473	1.00284	0.261979
Gm10324	220.646	-1.76067	2.33997e-09	5.59054e-08	9.91835	2.79736	9.13179	10.7049	2.96047	2.63425
Kank4os	1251.85	-1.75879	3.18483e-31	1.35261e-28	67.7364	19.1201	71.622	63.8507	19.9527	18.2876
Nexn	95.1611	-1.75563	5.2516e-05	0.000457162	2.49479	0.704933	2.59065	2.39892	0.622186	0.78768
Efcab6	187.203	-1.75558	6.42779e-07	9.28867e-06	3.90804	1.10921	3.5979	4.21819	1.45748	0.76094
Renbp	822.375	-1.75495	3.77056e-20	4.70402e-18	74.9202	21.231	81.7796	68.0608	24.3611	18.1008
C8g	131.57	-1.75101	1.78949e-06	2.31798e-05	13.1194	3.72346	13.2174	13.0215	3.87941	3.56752
Slc16a11	472.78	-1.74892	8.07358e-15	4.71218e-13	15.7904	4.49532	15.4771	16.1038	5.28608	3.70457
Gm8104	37.4665	-1.74874	0.00949043	0.038379	1.72948	0.49128	1.95183	1.50714	0.487064	0.495496
Selenoo	104.387	-1.74641	2.51161e-05	0.000240567	5.54639	1.57955	6.01186	5.08091	1.75214	1.40697
Galnt17	111.02	-1.74448	2.06605e-05	0.000203155	2.79999	0.79898	3.04109	2.55888	0.948149	0.649811
Rsph9	715.332	-1.74147	1.50899e-21	2.21478e-19	34.5445	9.86244	36.7501	32.3388	9.7585	9.96637
Gm30061	72.0646	-1.74008	0.000960137	0.00567356	2.37788	0.68217	2.00114	2.75462	0.915115	0.449224
Htr3b	98.0147	-1.73881	4.02019e-05	0.000363109	5.23604	1.49946	5.13694	5.33514	1.65862	1.3403
Nr1h3	34.7006	-1.73663	0.0123906	0.0479381	2.06163	0.591047	2.07522	2.04805	0.628215	0.553879
Tbc1d12	81.8016	-1.73337	0.000222736	0.00162264	2.38949	0.687287	2.47521	2.30377	0.829993	0.544581
Col18a1	725.511	-1.73182	0.00128692	0.0072957	12.8345	3.71991	10.4403	15.2287	5.00011	2.4397
Ube2h	5744.72	-1.72936	5.93607e-06	6.79026e-05	123.322	35.4971	156.455	90.189	36.795	34.1993
Erbb3	2284.72	-1.72774	2.63222e-30	1.03023e-27	48.9498	14.1516	45.8622	52.0374	16.2679	12.0353
Ldlr	1363.39	-1.7269	2.61512e-33	1.45001e-30	38.6438	11.152	37.9012	39.3864	11.4096	10.8944
Pitpnm1	822.983	-1.72344	4.5787e-15	2.77797e-13	10.0408	2.90549	7.75902	12.3225	2.8879	2.92309
Ccdc13	95.7798	-1.71867	0.0016008	0.00878329	2.32927	0.671269	1.97355	2.68498	0.290775	1.05176
Zfp37	643.747	-1.71154	5.09513e-13	2.30621e-11	10.3046	2.99359	11.7347	8.87454	2.37938	3.6078
Myrf	124.507	-1.71091	3.07194e-05	0.000286537	2.79191	0.817044	2.74425	2.83957	1.08548	0.548607
Hoxc4	191.031	-1.71014	1.59569e-05	0.000161438	5.13379	1.50758	3.91098	6.35659	2.10524	0.909915
Ccdc40	770.985	-1.7096	1.65465e-16	1.21876e-14	18.9339	5.53871	15.7308	22.1369	6.0681	5.00933
Pbx4	276.268	-1.70906	1.93232e-10	5.63905e-09	22.4913	6.57518	23.8248	21.1578	7.34693	5.80343
Sptbn2	1511.26	-1.70881	2.48352e-24	5.21827e-22	17.8277	5.21427	15.2372	20.4182	5.46223	4.96631
1700001C19Rik	125.966	-1.70857	0.000506587	0.00328845	4.65775	1.37076	5.35073	3.96477	2.1565	0.585024
Zfp36	1188.75	-1.70298	1.12397e-21	1.66189e-19	86.2133	25.3541	77.8981	94.5286	29.2612	21.4471
Gdap1	46.9484	-1.70128	0.0109699	0.0433264	1.52932	0.451197	1.75972	1.29891	0.691388	0.211007
Gm6781	141.463	-1.69856	3.03104e-06	3.71637e-05	10.8845	3.2045	12.0949	9.67402	3.57925	2.82974
Zik1	228.144	-1.69824	3.93803e-08	7.47926e-07	6.96435	2.05437	6.13904	7.78966	2.45649	1.65224
Dusp18	1670.05	-1.6957	3.03044e-35	1.89033e-32	43.3518	12.7848	44.9779	41.7257	13.3143	12.2553
Iqch	116.562	-1.69487	1.86336e-05	0.000185879	3.85437	1.13853	3.54594	4.16281	1.29815	0.978904
Atg9b	88.6971	-1.69263	0.000152227	0.00117502	2.90718	0.859227	3.21184	2.60251	0.937624	0.780831
Exoc3l	233.651	-1.68828	3.3872e-09	7.86184e-08	8.50323	2.5186	8.32201	8.68444	2.35266	2.68455
Havcr1	47.4552	-1.68559	0.00519162	0.0232876	2.41394	0.717423	2.61194	2.21594	0.846775	0.588072
Crmp1	84.9119	-1.68524	0.00019332	0.00144149	3.15476	0.93756	3.00378	3.30575	1.01526	0.859859
4930433N12Rik	48.2068	-1.68165	0.00499423	0.0225135	4.44649	1.32237	4.32085	4.57212	1.10818	1.53656
Zfy2	133.991	-1.67737	1.29675e-05	0.000134186	5.99947	1.78967	7.19358	4.80536	1.73214	1.8472
Zc2hc1c	231.914	-1.67732	4.46984e-09	1.01399e-07	6.30126	1.88205	6.75333	5.8492	1.99387	1.77023
Grap2	124.04	-1.67698	8.64133e-06	9.36426e-05	1.50041	0.448286	1.55946	1.44137	0.476186	0.420386
Gm4961	65.2779	-1.6765	0.00259091	0.0130929	3.69397	1.09996	3.47463	3.9133	0.680974	1.51895
Fdft1	9369.21	-1.67497	4.52629e-51	7.18023e-48	115.611	34.5862	124.451	106.772	35.9986	33.1739
Snx15	519.767	-1.67104	2.21199e-14	1.21635e-12	32.6792	9.78333	33.8207	31.5376	8.48738	11.0793
Nos1	441.895	-1.66836	4.28539e-13	1.97098e-11	5.80052	1.74002	6.0224	5.57863	1.51826	1.96178
Gm30188	64.1704	-1.66589	0.00163407	0.00892414	2.3974	0.72285	2.05623	2.73857	0.84934	0.59636
Gm39500	44.2148	-1.66354	0.00747706	0.0315805	5.17564	1.55861	5.29489	5.05638	1.33188	1.78534
Capn5	153.249	-1.66052	8.12709e-06	8.88903e-05	3.63347	1.10004	2.88833	4.37861	1.26991	0.930164
Flywch2	244.072	-1.66021	4.6195e-09	1.04546e-07	33.7258	10.1821	36.2997	31.1518	9.5257	10.8384
Rcan2	75.9465	-1.652	0.00513961	0.0230803	2.30848	0.696014	2.59756	2.01939	0.285516	1.10651
Lsp1	163.521	-1.65093	1.86128e-05	0.000185765	3.92988	1.19638	5.07269	2.78706	1.41538	0.977378
Kirrel2	263.895	-1.65063	6.59389e-10	1.76435e-08	10.7289	3.26286	11.1456	10.3123	3.24311	3.28262
Ryr2	186.917	-1.65025	1.8062e-05	0.000180539	1.39897	0.427002	1.76622	1.03172	0.565957	0.288047
Gm40612	64.0447	-1.63727	0.00199789	0.010581	4.89296	1.50532	4.84365	4.94227	1.89759	1.11305
Ushbp1	281.734	-1.63206	1.78415e-08	3.64517e-07	9.941	3.05915	8.49996	11.382	2.61285	3.50545
L1cam	58.0502	-1.6299	0.00417523	0.0194633	1.38753	0.429496	1.18366	1.5914	0.562512	0.29648
Tapbpl	205.709	-1.62956	4.55168e-08	8.54714e-07	10.4381	3.22342	10.557	10.3193	3.44704	2.99981
Slc12a5	214.309	-1.62925	4.49159e-08	8.45818e-07	4.38309	1.35356	3.99557	4.77061	1.36277	1.34436
Fgl1	1257.04	-1.62884	4.72013e-25	1.13516e-22	120.194	37.1033	131.45	108.939	37.4292	36.7774
Prx	73.8387	-1.62863	0.00342599	0.0164587	1.77109	0.550225	1.68976	1.85241	0.838106	0.262343
Gm36367	87.8821	-1.62807	0.000289042	0.00203082	10.8492	3.35394	12.0112	9.68716	3.73539	2.97249
Igf2	833.678	-1.62462	5.99289e-12	2.27856e-10	18.5466	5.77481	18.6152	18.478	7.65052	3.8991
EU599041	308.244	-1.62313	6.67251e-10	1.783e-08	20.4889	6.35514	23.0621	17.9157	6.93376	5.77653
Fendrr	173.635	-1.62097	1.83352e-05	0.000183177	6.60377	2.06009	6.16747	7.04006	2.8421	1.27808
Gm46110	197.48	-1.62002	1.41491e-06	1.88162e-05	2.93245	0.911431	3.58517	2.27973	1.00945	0.813409
Zfp978	199.273	-1.61782	3.60267e-06	4.31909e-05	9.77243	3.05161	10.6419	8.90291	4.06105	2.04216
Tdh	132.045	-1.61735	0.000214033	0.00156879	8.87494	2.77561	10.1117	7.6382	3.98053	1.57069
Pxk	868.944	-1.61448	2.45403e-21	3.49892e-19	31.9763	9.97259	34.1839	29.7686	10.1982	9.74701
Cox6b2	65.5159	-1.61376	0.00205405	0.0108353	13.4025	4.1913	12.7847	14.0204	5.24018	3.14242
Ak8	669.742	-1.61167	5.65196e-16	3.90376e-14	33.7586	10.5664	35.9917	31.5254	12.1694	8.96346
Chst5	139.028	-1.60466	3.27588e-05	0.000303011	9.04394	2.84552	7.08638	11.0015	3.20988	2.48115
Mvk	657.003	-1.60269	8.89522e-17	6.82914e-15	46.5604	14.6533	42.4644	50.6565	15.4262	13.8803
H19	366.972	-1.6021	4.84669e-11	1.56799e-09	20.1803	6.34008	19.9769	20.3837	5.57805	7.1021
Mc5r	71.0069	-1.60014	0.00414469	0.0193525	1.87681	0.58809	2.07709	1.67653	0.322016	0.854164
1700008O03Rik	49.7903	-1.59766	0.00682001	0.0292636	2.3733	0.750125	2.06721	2.67938	0.870506	0.629743
Ntsr1	132.994	-1.59745	0.000144596	0.00112526	4.26505	1.34133	3.70865	4.82145	0.890817	1.79185
Gba	989.912	-1.59734	3.07368e-23	5.78808e-21	55.1307	17.4041	52.6953	57.566	17.6348	17.1734
Egfl7	740.011	-1.59716	1.29048e-17	1.15512e-15	58.4522	18.4261	59.968	56.9365	16.7282	20.1241
Sidt1	199.751	-1.59563	9.31336e-07	1.28921e-05	5.40677	1.71089	4.41406	6.39948	1.85085	1.57094
Nyap1	80.0752	-1.59333	0.00118275	0.00679785	2.4853	0.788967	2.111	2.8596	1.00815	0.569781
Synj2	409.306	-1.59258	1.43199e-11	5.02356e-10	2.65076	0.840986	2.49169	2.80984	0.973189	0.708783
Ypel4	43.1595	-1.59117	0.0114775	0.0450459	1.61483	0.511962	1.86442	1.36524	0.556931	0.466993
Man2b2	72.5936	-1.59081	0.00126868	0.00720256	2.65737	0.844005	2.5547	2.76005	1.01585	0.672156
Hoxb8	56.7882	-1.59054	0.00762317	0.0320147	2.41216	0.762275	2.09776	2.72655	0.461159	1.06339
Pbx1	199.924	-1.58604	8.26741e-06	9.02602e-05	2.63466	0.841749	2.71352	2.55579	1.15099	0.532509
Slc30a3	55.1651	-1.58533	0.00884139	0.0362531	2.98017	0.953019	2.69403	3.26632	1.39002	0.516017
Fgf22	82.7911	-1.5852	0.000500836	0.00325535	7.06471	2.25028	6.76571	7.3637	2.42932	2.07125
Napb	130.69	-1.58316	7.92058e-05	0.000655212	3.75589	1.19597	4.74043	2.77135	1.18767	1.20427
P2rx5	88.3153	-1.58063	0.000408069	0.00273246	2.03258	0.649414	1.78652	2.27863	0.671674	0.627155
Plekhn1	48.0451	-1.58015	0.00932208	0.0378669	2.72543	0.868709	3.1023	2.34857	0.692991	1.04443
Gm31560	92.9599	-1.57938	0.00109117	0.00635012	1.27216	0.408455	1.14159	1.40273	0.575267	0.241642
Gm38826	204.452	-1.5771	1.61277e-07	2.66495e-06	11.6798	3.74022	12.3932	10.9663	4.03131	3.44913
Plb1	486.717	-1.57672	1.57825e-14	8.8245e-13	11.0505	3.53899	11.2965	10.8044	3.68322	3.39476
Tmem176b	61.3202	-1.57606	0.00347001	0.0166462	3.63058	1.16359	4.27924	2.98191	1.32504	1.00214
Ahsa2	462.481	-1.57427	3.99482e-12	1.5759e-10	13.8682	4.44255	12.8902	14.8463	3.9536	4.9315
Gm13470	191.392	-1.57272	3.0109e-05	0.000281238	38.8563	12.4964	51.0561	26.6564	15.2821	9.71081
Tmc7	1845.72	-1.5716	1.23268e-25	3.11461e-23	48.6959	15.63	45.0501	52.3416	14.5812	16.6789
Gm7324	63.7403	-1.57131	0.00252947	0.0128475	4.87323	1.56702	4.27826	5.46821	1.61124	1.52281
Plcl1	157.986	-1.5701	6.01371e-06	6.86334e-05	3.01964	0.972543	3.22776	2.81151	1.14224	0.802847
Pik3cd	2006.52	-1.56767	3.17979e-21	4.50154e-19	21.0576	6.78311	17.6956	24.4196	6.57678	6.98945
Gm38440	86.1682	-1.56402	0.00057371	0.0036564	2.06826	0.668833	1.81154	2.32497	0.735031	0.602636
Ndufaf6	394.633	-1.56385	6.21564e-12	2.34982e-10	10.1156	3.27081	10.2273	10.0039	3.60909	2.93253
Piwil4	2084.68	-1.56337	1.25865e-23	2.51239e-21	76.0643	24.6489	77.8718	74.2568	28.9901	20.3077
Cnnm1	133.59	-1.56178	6.91991e-05	0.00058282	1.1834	0.383978	1.1952	1.1716	0.499962	0.267994
Abcd4	188.722	-1.56025	7.22386e-07	1.02923e-05	6.30467	2.04018	6.81838	5.79097	1.93321	2.14715
Krt23	52.379	-1.55946	0.0059428	0.0260827	4.22693	1.36972	4.56891	3.88495	1.42814	1.3113
Gm272	170.691	-1.55944	6.67234e-06	7.47819e-05	2.76889	0.898935	3.03069	2.50708	1.10341	0.694461
Plppr1	97.1154	-1.55673	0.000340538	0.00232811	2.92345	0.950938	2.91192	2.93497	1.16806	0.733816
Nrbp2	59.4381	-1.55634	0.00597678	0.026203	2.27936	0.738464	2.89635	1.66237	0.626769	0.85016
Dusp3	260.327	-1.55619	2.26839e-06	2.85493e-05	7.25656	2.36002	9.29936	5.21376	2.80642	1.91363
Sncaip	191.802	-1.55535	7.40735e-07	1.05013e-05	5.1041	1.66084	4.82259	5.38561	1.88552	1.43616
Gm13110	98.1738	-1.55438	0.00149367	0.00829353	4.12994	1.33727	3.43468	4.8252	0.804304	1.87024
Cyria	1634.08	-1.55283	1.46348e-25	3.65157e-23	21.3977	6.95482	21.7837	21.0117	6.40138	7.50826
Gm33357	68.9076	-1.54996	0.00716652	0.0304623	8.35714	2.73829	10.4397	6.2746	4.04376	1.43282
Tspo	561.583	-1.54914	1.42477e-15	9.23373e-14	81.8184	26.698	81.4723	82.1645	26.539	26.8569
Rhof	524.753	-1.54698	3.53112e-13	1.63918e-11	6.16147	2.01623	5.5277	6.79523	2.17999	1.85246
Adcyap1r1	118.628	-1.54665	7.47752e-05	0.000624252	2.0937	0.685434	1.94086	2.24655	0.782796	0.588072
Zmynd15	167.128	-1.54393	6.92882e-06	7.73957e-05	2.99254	0.97852	3.34759	2.63748	0.855852	1.10119
Tceal1	45.365	-1.54092	0.011385	0.0447177	3.9643	1.30124	4.39432	3.53429	1.37232	1.23017
Prkcq	748.758	-1.53837	5.50196e-17	4.39298e-15	22.4829	7.40343	22.3101	22.6556	8.35041	6.45646
Chac1	101.34	-1.53777	0.00033577	0.00230162	8.03106	2.63933	7.00093	9.06119	2.27758	3.00108
Abcd1	185.073	-1.5364	4.06657e-05	0.000366966	6.30453	2.06738	5.57759	7.03147	1.37608	2.75868
Ube2a	912.802	-1.53579	1.4266e-18	1.46786e-16	65.5504	21.5686	62.6971	68.4036	19.8955	23.2418
Stat6	107.345	-1.53509	0.000185961	0.00139548	3.47881	1.14608	3.07492	3.88269	1.06466	1.2275
Stpg1	102.937	-1.53397	0.000197134	0.00146554	3.32273	1.09699	3.28925	3.35622	1.23598	0.958001
Parp8	1756.83	-1.53189	4.09472e-30	1.51361e-27	22.8147	7.53285	22.5614	23.068	7.44729	7.6184
Slc4a2	686.798	-1.53062	1.87398e-11	6.46054e-10	15.6737	5.19451	12.4313	18.9161	5.86085	4.52818
Gpsm3	2910.94	-1.53053	4.04322e-37	2.78299e-34	67.3678	22.261	69.3572	65.3784	22.1104	22.4116
Gm12258	171.134	-1.52777	3.44784e-05	0.000315989	5.02173	1.67017	4.61084	5.43262	2.22901	1.11133
Efcab12	94.6528	-1.52756	0.000326605	0.00224806	4.33037	1.43439	4.47865	4.18209	1.44104	1.42774
Cnr1	229.82	-1.52595	7.46743e-06	8.2626e-05	2.31966	0.765782	2.5233	2.11601	0.525722	1.00584
Vsir	91.1023	-1.52481	0.00267957	0.013466	1.5188	0.506542	1.77784	1.25975	0.74095	0.272133
Hrh1	89.8716	-1.52181	0.00076612	0.00467233	2.41712	0.802864	2.19085	2.64339	0.66443	0.941298
Rab3il1	455.525	-1.51785	2.53832e-10	7.24856e-09	9.36376	3.13147	9.64554	9.08199	3.84695	2.41599
Vwa5a	503.654	-1.5165	2.79019e-12	1.12515e-10	15.0323	5.0266	15.5884	14.4763	5.83327	4.21992
Mib2	407.924	-1.51491	3.13884e-10	8.87455e-09	11.9894	4.01527	10.8712	13.1077	4.65965	3.37089
Mgl2	272.591	-1.49885	2.72932e-08	5.36748e-07	9.54009	3.22747	10.0339	9.04626	3.65952	2.79542
F2	152.748	-1.4966	3.50383e-05	0.000320384	7.57581	2.56884	8.36532	6.78629	3.13862	1.99907
Ticam1	72.2302	-1.49572	0.00245608	0.0125194	3.15596	1.07052	3.30834	3.00358	1.29279	0.848237
Fgd5	1182.47	-1.49364	5.12328e-19	5.5883e-17	23.7378	8.06312	21.3252	26.1504	8.78509	7.34115
Pmvk	209.765	-1.48616	3.86073e-06	4.59261e-05	13.2813	4.54111	12.8227	13.7399	5.71883	3.36339
Tbc1d10c	189.292	-1.48409	2.03325e-05	0.000200226	6.34178	2.17223	6.84383	5.83973	2.84075	1.5037
Cpped1	691.176	-1.48277	3.85022e-12	1.52187e-10	15.4218	5.28658	14.0263	16.8174	6.36127	4.21189
Gm14124	106.49	-1.48267	0.00109976	0.0063889	4.35669	1.4927	5.39841	3.31497	1.94526	1.04014
Trim46	281.169	-1.48175	7.81387e-07	1.10228e-05	7.64117	2.62184	6.4063	8.87603	3.22771	2.01597
Gm8493	63.6109	-1.48084	0.00631665	0.0274042	2.23954	0.764473	2.73822	1.74086	0.632052	0.896894
Gm5577	63.5756	-1.48042	0.0052014	0.023321	5.51046	1.88728	6.52767	4.49325	2.15251	1.62205
Gm36876	54.5305	-1.47855	0.0124734	0.048131	2.00002	0.687477	2.32296	1.67707	0.935822	0.439131
Rab36	991.527	-1.47682	1.30153e-20	1.72052e-18	25.4494	8.7298	25.2706	25.6283	8.60419	8.85542
Pla2r1	74.1248	-1.47593	0.0103284	0.0413073	1.28251	0.443182	1.4889	1.07611	0.692127	0.194237
D130043K22Rik	68.2572	-1.47489	0.0038468	0.0181699	1.63414	0.562513	1.73344	1.53485	0.694428	0.430598
Fam131a	294.003	-1.47398	3.41472e-07	5.23915e-06	10.4637	3.60806	8.80731	12.12	4.33172	2.8844
Syce1l	246.524	-1.47356	4.09845e-07	6.18828e-06	33.6939	11.6073	36.247	31.1409	13.7872	9.42743
Eif4e3	205.035	-1.47355	1.38113e-06	1.84373e-05	3.69271	1.2685	3.96072	3.4247	1.15837	1.37863
Cela1	56.8364	-1.47319	0.00777705	0.0325719	6.32807	2.18105	6.39895	6.25719	2.69253	1.66957
Rps6kl1	103.419	-1.47284	0.000439249	0.00291001	4.38325	1.50922	3.7102	5.05631	1.55445	1.464
Gm35582	54.8479	-1.47256	0.00851599	0.0350862	5.87757	2.02024	5.65603	6.0991	1.70613	2.33434
Dpf1	224.452	-1.4725	1.84232e-06	2.37868e-05	6.9775	2.40742	6.27692	7.67807	2.90205	1.9128
Lix1l	62.8699	-1.47128	0.0060583	0.0264848	3.0785	1.06065	2.40938	3.74762	1.01734	1.10395
Ptch2	522.34	-1.46945	1.13717e-07	1.93677e-06	12.5288	4.3251	8.51128	16.5463	4.32151	4.32869
Plekhg2	2241.36	-1.46935	7.62436e-15	4.50266e-13	49.1018	16.9725	37.5509	60.6528	18.2854	15.6596
Ago1	220.346	-1.46754	5.42239e-06	6.26368e-05	3.63473	1.25448	2.88268	4.38679	1.13186	1.37709
Gm36263	89.0084	-1.46225	0.00093626	0.00555384	6.3105	2.18847	6.89142	5.72957	2.40572	1.97121
Tert	228.252	-1.46168	2.23126e-06	2.8153e-05	6.49106	2.25681	5.80482	7.1773	2.73892	1.7747
Ccdc84	493.831	-1.46104	7.64704e-13	3.34743e-11	17.3883	6.0337	17.907	16.8695	6.29528	5.77211
Lexm	63.2528	-1.46082	0.00756573	0.0318674	3.05777	1.06426	3.27585	2.83969	1.4387	0.689823
Fbxw17	474.775	-1.45961	1.49181e-12	6.20374e-11	21.249	7.37827	21.3743	21.1237	7.41614	7.34039
Nr4a1	2452.9	-1.45948	3.05786e-27	9.11014e-25	73.8008	25.6755	71.697	75.9046	28.5351	22.8159
Clip4	195.069	-1.4578	6.57547e-06	7.39453e-05	4.26324	1.48491	4.6576	3.86888	1.78678	1.18305
9130019O22Rik	92.2386	-1.45742	0.0013761	0.00771724	2.9139	1.01206	2.43329	3.39451	0.833726	1.1904
D830024N08Rik	265.936	-1.45736	1.2327e-06	1.66594e-05	2.29263	0.799613	2.50999	2.07528	1.00942	0.589806
Ifi35	97.6755	-1.45684	0.00101884	0.00598151	8.80566	3.05559	9.75722	7.85409	2.37734	3.73383
Btnl7-ps	716.922	-1.45578	2.91722e-16	2.06491e-14	1.29126	0.449562	1.35206	1.23047	0.458515	0.44061
Dgcr6	1145	-1.45338	7.51044e-22	1.12719e-19	24.8707	8.67935	24.7784	24.963	9.19582	8.16289
Trp53inp1	3204.31	-1.45259	8.73227e-29	2.85746e-26	72.2895	25.1838	71.794	72.785	23.2916	27.0761
Tmem132e	741.843	-1.45192	3.46536e-16	2.44424e-14	15.0094	5.24233	14.1818	15.8369	5.42312	5.06154
Pde9a	288.993	-1.4474	2.70343e-07	4.24503e-06	15.5021	5.43411	18.0996	12.9047	6.18115	4.68708
Cacng4	103.236	-1.44604	0.000922176	0.00548824	3.46312	1.21077	4.06083	2.86541	0.979316	1.44222
Aass	117.174	-1.44478	0.00017286	0.00131296	3.87482	1.36031	3.70498	4.04465	1.44833	1.27228
Gm6723	81.9843	-1.44357	0.00191617	0.0102048	13.4265	4.72088	11.5467	15.3063	5.23944	4.20232
Hvcn1	194.243	-1.44188	2.02255e-06	2.58464e-05	6.28724	2.21104	6.14506	6.42943	2.29652	2.12556
Slc35e4	175.655	-1.44157	7.02073e-06	7.82472e-05	7.02173	2.46722	7.13353	6.90993	2.30859	2.62585
Bambi	1942.5	-1.44005	1.53892e-23	3.0116e-21	41.8145	14.7018	45.5016	38.1275	14.2106	15.1929
Pi16	94.0267	-1.43695	0.0020692	0.0108872	4.33086	1.52756	5.63245	3.02928	1.66517	1.38995
Cdc20b	91.7279	-1.43502	0.00572151	0.0252224	1.91082	0.679019	2.18303	1.63861	1.02807	0.329965
Pla2g1b	809.659	-1.42869	1.49752e-12	6.21456e-11	119.109	42.3733	126.925	111.293	51.1529	33.5938
Foxi3	288.724	-1.42638	1.11554e-07	1.90481e-06	29.1801	10.3681	25.5518	32.8084	10.0182	10.7179
Chpf	99.406	-1.42121	0.00150398	0.00834609	3.74027	1.32962	3.76012	3.72042	0.946838	1.71241
Gm17232	54.911	-1.42052	0.0104409	0.0416614	1.75681	0.626721	1.97364	1.53998	0.64762	0.605823
Msmo1	4916.34	-1.42042	4.45859e-31	1.85412e-28	324.594	115.873	353.351	295.836	122.464	109.282
Atcay	199.247	-1.4201	3.88386e-06	4.61463e-05	6.26018	2.23335	5.7455	6.77486	2.10789	2.35881
Zfp689	136.355	-1.41663	0.000377619	0.00254823	4.58447	1.64583	3.7054	5.46354	2.06777	1.22389
Gm36235	150.088	-1.41575	3.40759e-05	0.000313019	10.1915	3.6489	10.608	9.77512	3.79627	3.50154
Cbarp	558.127	-1.41042	7.80235e-10	2.05737e-08	14.7789	5.31615	11.9201	17.6377	5.56225	5.07006
Ap3b2	117.978	-1.40554	0.000452583	0.00298645	3.64018	1.31369	2.96009	4.32026	1.38383	1.24355
Pou5f1	1075.98	-1.40345	1.70477e-19	1.98999e-17	30.2046	10.9056	31.6727	28.7364	11.2279	10.5834
Efcab1	109.806	-1.40293	0.000599232	0.00379964	1.67925	0.606363	1.96689	1.3916	0.631758	0.580967
Zhx1	656.555	-1.40105	1.73716e-13	8.39599e-12	7.61797	2.75225	8.1106	7.12534	2.61872	2.88578
Gm39141	141.037	-1.39867	0.000211789	0.00155538	9.18755	3.32539	11.2322	7.14289	3.33215	3.31863
Enkur	536.802	-1.39496	4.12452e-10	1.14188e-08	54.3176	19.7761	56.7512	51.8839	23.8434	15.7087
Cep112	280.954	-1.39414	7.27418e-08	1.30576e-06	8.12603	2.95132	8.3906	7.86146	2.86252	3.04013
Nbeal2	215.525	-1.39371	4.40955e-05	0.000394173	2.96392	1.07359	2.63799	3.28985	0.773226	1.37395
Catsperg1	84.3162	-1.39257	0.00272122	0.0136375	1.51641	0.552674	1.65015	1.38268	0.681075	0.424273
Best1	204.014	-1.39168	2.71967e-06	3.37607e-05	11.8722	4.32016	12.0744	11.6699	4.25011	4.39021
Ccdc114	550.749	-1.38944	1.03087e-12	4.38748e-11	14.9271	5.44129	14.6683	15.1859	5.42724	5.45533
Armcx2	2445.01	-1.38918	1.83236e-24	3.93288e-22	76.9717	28.1175	74.0087	79.9347	31.2513	24.9838
Dhtkd1	239.39	-1.38766	1.02028e-05	0.000108386	3.78756	1.38078	3.05765	4.51747	1.19115	1.5704
Tmem179	110.296	-1.38604	0.00155137	0.00857021	5.62704	2.06435	4.62893	6.62514	2.68912	1.43958
Dll4	319.6	-1.38516	4.8424e-05	0.000426939	11.1874	4.08725	6.9641	15.4107	3.59961	4.5749
Acat2	1467.72	-1.38408	1.22777e-19	1.48248e-17	85.5697	31.2921	94.0691	77.0702	31.2302	31.3539
Hook2	421.707	-1.38405	3.81499e-09	8.80359e-08	9.93133	3.64211	9.89643	9.96622	4.32041	2.96382
Ccdc162	295.426	-1.38239	1.14796e-07	1.9535e-06	3.73799	1.37151	3.70032	3.77567	1.5748	1.16821
Arhgap33os	63.2232	-1.38093	0.00782638	0.0327516	2.88481	1.05727	2.64483	3.12479	0.963942	1.15061
Olah	251.913	-1.3806	1.59184e-06	2.09182e-05	20.1994	7.40862	23.4501	16.9487	7.78103	7.03621
Klf6	1811.19	-1.37932	1.42325e-18	1.46786e-16	51.9472	19.0629	59.2462	44.6482	19.4501	18.6757
Lpin1	4563.03	-1.37877	5.53468e-29	1.8725e-26	77.3833	28.4352	84.1125	70.6541	30.1433	26.727
Abhd8	184.75	-1.37172	1.23163e-05	0.000128245	9.50007	3.50999	9.32504	9.6751	3.91357	3.10641
Lzts2	1003.74	-1.37056	8.08059e-12	2.98698e-10	24.741	9.16698	20.8932	28.5888	10.6746	7.65936
Zfp467	590.148	-1.36975	9.32267e-13	4.02792e-11	13.9427	5.14998	13.8751	14.0103	4.96573	5.33423
Actn3	374.019	-1.36948	4.66608e-08	8.72874e-07	15.6368	5.79495	15.0149	16.2586	6.98472	4.60517
Zfp993	230.768	-1.36764	3.35484e-06	4.06209e-05	6.14083	2.27716	6.16105	6.12062	2.70167	1.85265
Taok3	870.23	-1.36682	2.85556e-14	1.53638e-12	15.6951	5.82384	15.5203	15.87	6.69171	4.95597
Rbks	334.776	-1.36674	2.85551e-06	3.52716e-05	24.8625	9.1864	31.3939	18.3311	8.42985	9.94295
T	278.37	-1.36598	1.2744e-07	2.1467e-06	16.4015	6.07819	15.854	16.9489	6.15465	6.00173
Acadvl	3784.33	-1.36479	2.16746e-31	9.61436e-29	104.265	38.6978	107.971	100.56	41.317	36.0786
Zfp72	91.7335	-1.3642	0.00294121	0.0144854	2.63866	0.98039	1.98961	3.28772	1.05669	0.904089
Npepl1	436.12	-1.36311	4.78028e-09	1.07818e-07	23.0393	8.5367	23.2481	22.8306	7.31423	9.75916
Gm29243	249.739	-1.36278	2.097e-06	2.66783e-05	66.6317	24.7637	75.5153	57.7481	27.6711	21.8563
Lrrn1	256.128	-1.36207	4.9533e-07	7.33478e-06	8.21314	3.05214	7.67439	8.7519	3.08078	3.0235
Efhb	200.857	-1.36148	1.38838e-05	0.000142193	4.41753	1.64437	4.80089	4.03418	1.92455	1.36419
Epb41l1	318.864	-1.36097	6.41916e-08	1.16909e-06	2.99717	1.11605	2.996	2.99833	1.27427	0.957842
Cend1	279.094	-1.35506	2.41702e-07	3.85352e-06	18.1981	6.79604	19.6483	16.7478	7.19019	6.4019
Lhx1	1766.79	-1.35453	2.87784e-12	1.15583e-10	51.1352	19.0208	46.5328	55.7377	14.9931	23.0485
Clip3	698.217	-1.35173	1.40681e-07	2.35187e-06	25.0035	9.41491	22.7003	27.3067	12.6435	6.18632
Krtap17-1	140.716	-1.34924	0.000189863	0.00142102	22.1719	8.3054	25.2179	19.126	8.1404	8.4704
Ssbp4	1012.48	-1.34832	9.82925e-16	6.454e-14	60.1343	22.5838	63.7776	56.491	25.0964	20.0712
Gm33302	897.59	-1.3477	2.44942e-14	1.33953e-12	128.446	48.2621	137.701	119.192	53.9878	42.5365
Anks3	520.957	-1.34246	7.86881e-10	2.07216e-08	9.69319	3.65921	9.26657	10.1198	4.29903	3.01938
Itpk1	1190.76	-1.34037	3.09282e-18	2.99688e-16	50.011	18.8765	47.1083	52.9137	19.8112	17.9418
Cfap43	70.8734	-1.33955	0.00754949	0.0318191	1.34879	0.509384	1.58892	1.10866	0.579811	0.438957
Bmf	577.805	-1.33906	4.33723e-11	1.41232e-09	13.4114	5.06843	12.0871	14.7358	5.41862	4.71824
2610008E11Rik	140.164	-1.33737	0.000583002	0.00370733	3.97821	1.50895	4.09659	3.85983	1.9918	1.0261
Tmem106a	481.396	-1.33637	1.25583e-10	3.75827e-09	22.1768	8.39332	22.9688	21.3847	9.05426	7.73237
Dnal1	244.423	-1.33538	1.41919e-06	1.88605e-05	4.92804	1.86485	4.62774	5.22834	1.81852	1.91119
Gnas	1181.62	-1.33526	5.59203e-19	6.06644e-17	11.9482	4.5206	11.9064	11.9901	4.43691	4.60429
Tle2	195.847	-1.33181	9.61745e-06	0.00010288	5.87399	2.22855	5.90804	5.83995	2.23737	2.21974
H2-Ke6	144.7	-1.32996	0.000155124	0.00119461	4.49492	1.70774	4.95171	4.03813	1.78729	1.62818
Gm12786	82.9605	-1.3287	0.00665648	0.0286543	1.87719	0.716638	1.8653	1.88908	0.980007	0.453269
Maats1	124.669	-1.3282	0.00064122	0.00401361	4.97727	1.89639	4.18172	5.77282	2.12923	1.66356
Radil	1189.07	-1.32563	4.60211e-10	1.26012e-08	24.3441	9.30384	18.5503	30.1379	10.4788	8.12886
Car6	561.773	-1.3249	1.407e-11	4.94458e-10	24.5159	9.34065	24.2688	24.763	8.94313	9.73818
Zfp976	84.8902	-1.32443	0.00605069	0.0264574	1.51618	0.576455	1.36725	1.66511	0.407222	0.745689
Spocd1	892.142	-1.32391	2.93162e-11	9.80202e-10	16.2784	6.23002	14.5462	18.0106	7.38787	5.07216
Zmiz1	792.694	-1.32274	8.38905e-14	4.20738e-12	8.95216	3.41612	8.47843	9.42589	3.27246	3.55978
Gm38481	87.7922	-1.32256	0.00261122	0.0131623	4.16959	1.59355	4.18671	4.15246	1.75709	1.43001
Gstp-ps	142.282	-1.31833	0.000492644	0.00321467	3.1339	1.20103	2.422	3.84581	1.2092	1.19286
Hip1r	1676.21	-1.3183	3.84165e-15	2.35224e-13	44.1981	16.9069	38.4972	49.8989	15.5809	18.233
Zfp799	570.846	-1.31815	2.16241e-09	5.20047e-08	10.7358	4.1242	10.6393	10.8323	5.00809	3.24032
Pcp4l1	2880.69	-1.31585	4.56549e-27	1.24838e-24	218.414	83.8481	226.874	209.954	89.0275	78.6688
Cnn2	636.682	-1.31443	4.16596e-12	1.63694e-10	42.6438	16.3934	40.5425	44.745	17.7616	15.0252
Arhgap8	103.528	-1.31232	0.00131468	0.00741939	4.3978	1.69306	4.51247	4.28312	1.90758	1.47855
Gm10323	112.779	-1.31192	0.000934176	0.00554478	5.049	1.94171	5.69639	4.4016	1.9787	1.90473
1700017B05Rik	1402.65	-1.31185	1.60234e-12	6.60832e-11	27.3268	10.5079	22.2802	32.3734	9.99924	11.0165
Opn3	152.36	-1.31168	0.000153729	0.00118478	9.88755	3.80275	11.1444	8.63073	3.84011	3.76539
Cdh13	161.265	-1.31123	0.00217051	0.0113177	4.6334	1.7955	5.12396	4.14283	2.68061	0.910395
Dbndd1	161.794	-1.30981	6.70664e-05	0.000566052	4.73287	1.82364	4.6121	4.85365	1.85782	1.78947
Rab39	72.8088	-1.30924	0.00703647	0.0300182	2.92009	1.12391	2.90319	2.93699	0.973697	1.27412
Fam126a	540.289	-1.30908	3.46664e-11	1.14565e-09	8.59473	3.31505	8.78125	8.4082	3.56361	3.06649
Zfp938	506.296	-1.30821	2.9984e-10	8.50157e-09	26.1626	10.0964	28.0767	24.2484	10.912	9.28074
Apbb1	3658.48	-1.30764	8.98387e-26	2.32892e-23	104.916	40.5457	100.294	109.539	44.3026	36.7888
Ss18l1	734.552	-1.30616	2.26375e-13	1.08102e-11	18.823	7.27164	17.7603	19.8856	7.39383	7.14946
Sfxn3	169.691	-1.30414	0.00109629	0.00637617	5.14877	2.00304	5.51362	4.78392	2.8787	1.12738
Gm47708	179.566	-1.30262	7.48414e-05	0.000624544	27.7189	10.7528	28.9346	26.5032	12.8948	8.61084
Cfap45	134.377	-1.30157	0.000953353	0.00564015	8.79282	3.41495	10.2368	7.34883	4.29622	2.53368
Chd3	1687.27	-1.29965	8.73502e-21	1.1624e-18	25.2005	9.78564	24.0586	26.3424	10.3698	9.20145
Tmc8	476.117	-1.29922	1.31424e-06	1.76538e-05	14.9757	5.78954	13.0119	16.9394	4.32287	7.25621
H2-D1	1157.89	-1.29916	1.06442e-11	3.82138e-10	19.8547	7.73046	21.4454	18.2639	9.39795	6.06297
Dnah14	337.067	-1.29784	2.30451e-07	3.6948e-06	2.73891	1.06581	2.8333	2.64451	1.24295	0.888672
Rab4a	626.548	-1.29762	5.59209e-11	1.78028e-09	47.6979	18.5031	47.5271	47.8687	16.6137	20.3924
Btbd6	645.418	-1.29689	2.03001e-09	4.90569e-08	15.1738	5.88614	13.6067	16.7409	5.03266	6.73962
Fam13a	94.278	-1.29496	0.00229076	0.0118277	2.61137	1.01733	2.52435	2.6984	1.10988	0.924779
Arhgef9	174.541	-1.29438	8.37379e-05	0.000688423	3.32375	1.29656	3.08156	3.56595	1.49892	1.09421
Extl1	197.78	-1.29178	3.29454e-05	0.000304314	5.60534	2.18729	4.89129	6.31939	2.19309	2.18148
Smim40	83.7826	-1.29167	0.00476044	0.0216484	1.67049	0.650822	1.58487	1.75611	0.557318	0.744325
Zswim4	1050.72	-1.29111	8.36055e-16	5.54435e-14	28.7079	11.2164	27.3996	30.0163	12.1129	10.3199
Eva1b	1384.59	-1.28851	4.19868e-15	2.56299e-13	61.3951	23.9511	60.9432	61.8469	21.1041	26.798
1700012B07Rik	79.2982	-1.28843	0.0112231	0.0442038	6.16856	2.42342	5.78962	6.54749	3.39667	1.45017
Krt222	328.507	-1.28477	1.30915e-07	2.19781e-06	12.0605	4.72877	12.9063	11.2147	4.97397	4.48357
Ptpn13	5397.96	-1.28105	1.02554e-24	2.38033e-22	77.2424	30.3503	70.1073	84.3776	29.9879	30.7126
Zfp667	1869.18	-1.28037	3.32355e-22	5.43781e-20	42.5582	16.7273	44.0742	41.0422	16.7161	16.7384
Lin28a	12326.5	-1.27973	0.00220995	0.0114847	293.796	116.279	321.751	265.841	150.791	81.7677
Snx27	1629.34	-1.27733	1.22508e-16	9.12456e-15	18.9628	7.48524	20.1097	17.8158	8.48834	6.48213
Slit3	574.739	-1.27686	3.22853e-08	6.2507e-07	13.6261	5.38873	11.8344	15.4179	6.47155	4.3059
Dnajc5g	234.979	-1.27621	3.16894e-05	0.000295034	17.4982	6.92095	15.8007	19.1956	8.50304	5.33885
Fam169b	254.316	-1.27601	1.88306e-06	2.41878e-05	8.97332	3.54055	8.89398	9.05267	3.72575	3.35536
Irs2	113.7	-1.27589	0.00352636	0.0168881	1.98234	0.78525	1.58424	2.38045	1.02692	0.543582
H2-DMa	152.96	-1.27568	0.000352611	0.00239975	1.22236	0.48114	1.3583	1.08643	0.407704	0.554575
Isyna1	14550.8	-1.27443	3.03648e-30	1.1656e-27	937.151	369.526	898.172	976.13	351.307	387.745
Bcl11a	152.538	-1.27391	0.000184875	0.00138941	1.69127	0.668698	1.64285	1.73969	0.740899	0.596497
Gm30581	239.67	-1.27092	4.72343e-06	5.5137e-05	31.5664	12.4898	30.1288	33.004	12.1278	12.8518
Orai1	100.582	-1.26975	0.00217101	0.0113177	4.85521	1.92438	5.23144	4.47898	2.11669	1.73208
Ramp2	143.982	-1.26909	0.000867397	0.00520725	19.5496	7.77375	20.1212	18.9781	10.1476	5.39988
Tnfsf12	138.406	-1.26872	0.000339007	0.00231982	9.6659	3.83276	10.1399	9.19186	4.06836	3.59717
Tulp4	383.047	-1.2669	1.00814e-07	1.74162e-06	3.72222	1.47923	4.00277	3.44166	1.68435	1.27411
Elovl6	899.313	-1.26525	3.95958e-09	9.11616e-08	17.8607	7.06698	19.8704	15.8509	5.64748	8.48648
Lgals1	608.807	-1.26375	1.63697e-11	5.72253e-10	89.8992	35.7685	86.8989	92.8995	36.7988	34.7382
Map3k1	254.404	-1.2633	3.36567e-06	4.07164e-05	1.58764	0.631134	1.59722	1.57806	0.588987	0.673281
Cpne8	244.069	-1.26309	1.15174e-05	0.000120882	5.62241	2.23976	4.84667	6.39815	2.39018	2.08934
Npr2	266.041	-1.26239	4.11837e-06	4.86718e-05	4.63216	1.84753	4.48672	4.7776	2.14402	1.55103
Gm34128	72.6564	-1.26162	0.0129899	0.049667	15.495	6.15445	14.5309	16.4591	4.4619	7.84699
Itpkb	383.769	-1.25781	6.90966e-08	1.24931e-06	6.52692	2.60939	5.95126	7.10258	2.79647	2.42231
Gramd1a	429.332	-1.25766	3.60684e-08	6.91605e-07	13.4706	5.38981	14.0076	12.9335	6.24054	4.53908
Zup1	265.623	-1.25723	2.29467e-06	2.88438e-05	6.62933	2.64673	6.89333	6.36533	2.51994	2.77353
Ubxn11	200.552	-1.25609	0.00014683	0.00113821	4.62361	1.85503	4.66426	4.58296	2.3759	1.33416
Mgmt	1215.7	-1.25559	1.90844e-17	1.642e-15	79.8275	31.927	78.3596	81.2954	31.9302	31.9239
Tnrc6c	4921	-1.25406	3.36877e-27	9.88884e-25	58.867	23.596	55.6556	62.0784	24.951	22.241
Themis2	942.456	-1.25249	2.27735e-13	1.08492e-11	28.2762	11.3536	28.5881	27.9643	12.8167	9.89054
Gngt2	91.114	-1.25225	0.00431531	0.0200006	7.96797	3.19791	8.79846	7.13747	3.65817	2.73765
Mapk9	1981.41	-1.25215	3.33445e-18	3.21541e-16	46.5608	18.6663	51.5079	41.6136	19.2278	18.1048
Ehmt2	4490.18	-1.25191	6.75461e-22	1.03714e-19	32.0302	12.8622	28.7948	35.2656	13.6775	12.0468
Id4	329.59	-1.24869	1.71254e-07	2.82046e-06	9.79678	3.93834	10.0081	9.58548	4.07922	3.79747
Tceanc2	309.594	-1.24707	1.22399e-06	1.65754e-05	5.49146	2.21355	5.29594	5.68699	2.54995	1.87714
B4galt1	2150.4	-1.24648	4.50675e-23	8.25313e-21	59.2714	23.8666	58.2382	60.3046	24.6028	23.1305
Mtus1	2877.62	-1.24201	2.39753e-25	5.83623e-23	41.0113	16.5556	40.2912	41.7314	16.5074	16.6037
Cxcl16	152.858	-1.24111	0.000258999	0.00185101	4.95927	2.00578	4.98116	4.93737	2.22917	1.78238
Lhx1os	130.016	-1.24038	0.000672134	0.00418219	24.5081	9.91032	25.9915	23.0248	10.4991	9.32151
Casz1	591.349	-1.23842	8.90883e-08	1.56265e-06	3.29312	1.33777	2.85061	3.73563	1.61677	1.05877
Gm28321	612.209	-1.23747	3.4045e-10	9.57145e-09	29.2649	11.8374	30.7422	27.7876	10.9038	12.7711
Oplah	409.488	-1.23526	4.38999e-06	5.16983e-05	9.7157	3.95606	7.89498	11.5364	4.79661	3.11551
Spata24	250.425	-1.22926	8.11022e-06	8.87544e-05	29.2811	11.9151	29.9883	28.574	10.943	12.8872
Gripap1	1234.26	-1.22922	2.06351e-14	1.14037e-12	31.3797	12.8052	32.6443	30.115	14.4694	11.1409
Sall1	1280.87	-1.22724	8.85164e-17	6.82192e-15	26.2876	10.7302	25.2275	27.3476	11.2145	10.246
Dusp4	856.609	-1.22687	2.83111e-09	6.66412e-08	41.3527	16.8277	37.3922	45.3131	13.9878	19.6676
Ifitm2	213.893	-1.22542	2.87504e-05	0.000270192	18.1179	7.39628	19.4956	16.7402	7.25426	7.53829
Zfp874b	195.642	-1.22288	6.40804e-05	0.000543608	3.96894	1.62292	3.78058	4.1573	1.5183	1.72754
Fahd2a	95.0367	-1.22193	0.00946491	0.0382913	9.05134	3.71981	10.5316	7.57107	5.0415	2.39811
Rilpl1	464.389	-1.22177	4.45637e-08	8.39976e-07	22.6587	9.26667	21.1422	24.1752	8.33461	10.1987
Fkbp14	417.506	-1.22157	1.11346e-07	1.9029e-06	8.02986	3.29489	7.63718	8.42253	3.78554	2.80423
Tbc1d14	2586.68	-1.21885	5.99263e-22	9.34522e-20	48.9681	20.1151	47.204	50.7322	21.5496	18.6805
Chac2	114.214	-1.21812	0.00289686	0.0143165	10.0387	4.11678	8.36985	11.7075	3.58248	4.65108
Klk13	209.61	-1.21649	5.75501e-05	0.000495368	10.9137	4.49195	9.84262	11.9847	4.99825	3.98565
Ppp1cb	8858.55	-1.21638	1.00139e-29	3.44632e-27	249.903	102.607	248.274	251.533	98.9944	106.22
Crygs	179.596	-1.21535	0.000144991	0.00112789	22.0105	9.04211	22.1009	21.9201	8.11597	9.96826
Dock7	2529.18	-1.21533	6.74942e-20	8.21495e-18	15.6333	6.43102	17.0177	14.249	6.6877	6.17434
Slc25a12	547.966	-1.2151	9.7331e-09	2.07124e-07	7.12065	2.9352	6.5277	7.71361	3.33681	2.53359
Nicn1	426.77	-1.21427	3.75991e-08	7.18197e-07	23.5119	9.6684	23.4504	23.5734	8.98152	10.3553
Mapk11	680.672	-1.21423	8.4521e-09	1.82985e-07	32.5442	13.3707	29.1084	35.9799	11.5929	15.1486
Cfap74	164.215	-1.21411	0.000225517	0.00163991	1.12918	0.464476	1.18786	1.0705	0.440305	0.488648
Baz2a	3466.53	-1.21397	1.63647e-21	2.38434e-19	41.5068	17.1112	38.4688	44.5448	18.3082	15.9143
Piwil1	599.552	-1.21035	4.22718e-09	9.65431e-08	17.5403	7.2544	16.0585	19.0222	8.24423	6.26457
Gm18412	74.5695	-1.20966	0.0105758	0.0420776	9.21714	3.80359	9.43944	8.99483	3.60144	4.00574
Hdac5	2809.73	-1.20858	3.0545e-13	1.42455e-11	68.7638	28.4352	55.7122	81.8155	28.7598	28.1106
Chd1	639.505	-1.20849	2.96785e-09	6.95319e-08	9.44055	3.90619	10.521	8.36014	4.38422	3.42817
Kctd18	4984.74	-1.20426	1.23424e-27	3.79026e-25	125.657	52.1234	121.865	129.449	54.6824	49.5644
Zfp40	253.784	-1.20312	1.00435e-05	0.000106979	2.37573	0.984892	2.56087	2.19059	0.962441	1.00734
Dcp1b	795.798	-1.2021	1.45594e-10	4.31187e-09	23.8952	9.90691	26.7491	21.0413	9.50242	10.3114
Ttll7	568.857	-1.20125	4.25469e-09	9.70603e-08	5.96795	2.48241	6.32957	5.60634	2.81497	2.14985
Mapk4	445.299	-1.20042	1.36133e-08	2.85436e-07	7.60491	3.16242	7.67547	7.53435	3.36399	2.96086
Zfp974	189.104	-1.19863	0.000245429	0.00176383	2.88778	1.19869	3.02461	2.75095	0.981437	1.41595
Rgs12	1730.19	-1.19822	6.70626e-17	5.24955e-15	25.2936	10.5315	23.2448	27.3424	10.7182	10.3448
Gm41640	230.841	-1.19725	5.96778e-05	0.000511696	6.41349	2.67773	6.44644	6.38054	3.24361	2.11185
Tmem62	146.605	-1.19712	0.000930494	0.00552621	4.9467	2.06272	5.69383	4.19957	2.36276	1.76269
Tmem132a	218.378	-1.19631	0.000218924	0.00159954	6.48674	2.70416	4.96743	8.00605	2.62766	2.78066
Zfp988	1081.47	-1.19624	2.54845e-14	1.38609e-12	19.6746	8.20464	20.7492	18.6001	8.71293	7.69635
Ptpro	328.597	-1.19411	6.35795e-06	7.18229e-05	5.46298	2.27467	5.41324	5.51272	1.87185	2.67749
Upb1	84.9641	-1.19401	0.012192	0.0474116	3.256	1.36428	3.22318	3.28881	1.81803	0.910526
Cela2a	523.94	-1.19366	5.17558e-09	1.15948e-07	66.1164	27.6441	65.8938	66.3391	30.8809	24.4072
Fmnl1	754.056	-1.19287	7.56889e-10	2.0107e-08	21.5831	9.03021	18.8383	24.3279	9.7723	8.28812
Dtna	2204.93	-1.19245	5.69342e-16	3.91884e-14	21.4696	8.9936	22.0627	20.8766	10.3518	7.6354
Zfp185	862.603	-1.19034	4.99218e-13	2.26475e-11	16.0468	6.71823	16.4624	15.6312	7.03139	6.40506
Hpse2	722.592	-1.18973	3.39949e-11	1.1272e-09	11.9861	5.02411	11.8122	12.16	5.49437	4.55385
Proser3	581.156	-1.18794	2.07039e-08	4.18714e-07	26.0237	10.9308	28.0248	24.0225	12.7675	9.09419
Zfp810	288.606	-1.18698	6.09209e-06	6.94088e-05	7.51431	3.14778	7.56369	7.46494	2.82088	3.47469
LOC108168043	143.514	-1.18674	0.00083986	0.00506632	8.79173	3.68315	8.8994	8.68407	3.22933	4.13697
Vil1	138.858	-1.18645	0.000887261	0.00530894	5.1771	2.17302	4.68297	5.67123	2.18374	2.1623
Rsph3b	203.352	-1.18304	7.59513e-05	0.000632221	14.6384	6.15329	15.6212	13.6556	5.95693	6.34965
Mbl2	211.426	-1.1814	5.43321e-05	0.000471327	20.2688	8.53212	19.4804	21.0573	8.22033	8.84391
Rb1	612.543	-1.18104	2.29639e-07	3.6877e-06	11.0896	4.68623	12.1261	10.0531	5.79154	3.58092
Nipsnap1	804.403	-1.18021	4.64454e-12	1.81073e-10	11.8838	5.01005	11.3518	12.4158	5.13232	4.88778
Cartpt	152.86	-1.18009	0.000929404	0.00552303	17.8192	7.51544	20.9259	14.7125	8.36331	6.66757
Mrps15	893.661	-1.17987	8.23954e-09	1.78966e-07	110.561	46.4431	109.01	112.112	37.3716	55.5145
Gstp1	1127.13	-1.17928	1.29124e-13	6.32214e-12	87.9154	37.1103	81.4996	94.3312	39.2255	34.995
Ctns	1698.01	-1.17883	7.4353e-16	4.99718e-14	29.1265	12.3102	28.811	29.4421	13.8161	10.8043
Rasal1	117.039	-1.17815	0.00220031	0.0114435	2.75827	1.16307	2.9195	2.59703	1.0886	1.23753
Sgsm1	618.069	-1.17611	5.28444e-09	1.18254e-07	10.7787	4.56511	10.1944	11.3631	5.23062	3.89959
Idh2	192.466	-1.17611	0.00039757	0.00267022	4.02247	1.70444	4.44423	3.60071	2.11293	1.29594
Nxph4	120.652	-1.17357	0.00596451	0.0261608	8.3388	3.52931	5.80967	10.8679	3.20017	3.85846
Hint2	1022.64	-1.17076	2.67723e-13	1.25446e-11	200.533	85.0176	212.182	188.883	83.6442	86.3909
Sspn	177.919	-1.16855	0.00341466	0.0164241	2.2513	0.963041	2.22861	2.27399	1.40212	0.523957
Pkn3	161.303	-1.16729	0.00305791	0.0149642	4.2093	1.78254	3.51133	4.90728	1.21	2.35508
Adamts17	298.606	-1.16404	6.34727e-06	7.17835e-05	3.87481	1.64995	3.67283	4.07679	1.51799	1.7819
Ptprt	163.465	-1.16133	0.000598986	0.00379964	1.32089	0.563288	1.23728	1.4045	0.493844	0.632733
Dlx4	453.024	-1.16077	5.12687e-07	7.55258e-06	21.5228	9.17252	22.3618	20.6838	7.83345	10.5116
Foxf1	954.24	-1.1585	1.43644e-12	5.98597e-11	45.484	19.4831	44.7799	46.188	21.2622	17.704
Chd7	2416.88	-1.15832	2.77422e-18	2.71452e-16	21.2733	9.11429	22.2892	20.2574	9.98282	8.24577
Sipa1	3609.7	-1.15696	3.56733e-13	1.64832e-11	106.545	45.8217	107.221	105.868	55.6794	35.964
Slc5a3	394.963	-1.15685	1.39298e-06	1.85616e-05	4.18326	1.79605	4.13428	4.23224	2.12846	1.46363
Idi1	1450.92	-1.15658	1.75984e-14	9.81235e-13	58.4901	25.0682	63.7186	53.2617	26.5312	23.6051
Zfp979	1345.62	-1.15483	4.15617e-16	2.91092e-14	30.2488	12.9772	29.8932	30.6044	13.2835	12.671
Synrg	209.173	-1.15469	7.3998e-05	0.000618898	3.11008	1.33391	3.20816	3.01199	1.33645	1.33136
Kif6	187.279	-1.15366	0.000163139	0.00124959	3.00145	1.2887	3.09005	2.91284	1.33442	1.24299
Zfp773	657.021	-1.15355	3.91902e-10	1.09104e-08	25.0816	10.7784	25.3211	24.842	11.7289	9.8279
Padi3	1899.75	-1.1528	1.78694e-15	1.13596e-13	35.7243	15.3768	34.8852	36.5635	17.3383	13.4152
Gm32885	753.654	-1.15124	4.13348e-11	1.34929e-09	123.858	53.2329	122.239	125.478	51.7533	54.7125
Cacna1h	670.377	-1.15057	1.17423e-07	1.99479e-06	7.14163	3.07685	5.77618	8.50708	3.27034	2.88336
Aplp1	730.634	-1.14947	1.07534e-10	3.27208e-09	35.2351	15.1852	34.1485	36.3218	16.3979	13.9726
Arhgef15	1811.22	-1.14744	7.93094e-16	5.29463e-14	35.1023	15.1259	32.7388	37.4657	14.6647	15.5871
Lipe	735.024	-1.14715	2.64005e-09	6.25867e-08	19.057	8.21426	16.8709	21.243	7.86892	8.5596
Acap3	1390.15	-1.14503	2.21202e-15	1.39729e-13	34.55	14.9275	32.9328	36.1671	15.4164	14.4386
Dhrs3	232.355	-1.14159	4.85945e-05	0.000428254	4.81911	2.0847	5.07232	4.56591	2.00756	2.16184
Tdrd7	1060.68	-1.14158	7.80157e-13	3.40016e-11	24.1085	10.4388	25.8344	22.3826	10.9125	9.96509
Hspa1l	130.582	-1.14125	0.00176982	0.00954022	1.55712	0.675027	1.55685	1.5574	0.757476	0.592577
Akr1b8	1847.42	-1.14086	3.04434e-18	2.9643e-16	160.031	69.3192	156.429	163.633	70.4871	68.1513
Tmem52	236.334	-1.14046	3.66857e-05	0.000334223	28.1072	12.1729	29.0163	27.1981	12.0418	12.304
Uhrf1bp1	980.288	-1.13943	5.75132e-09	1.27985e-07	6.581	2.85774	5.38689	7.77511	3.05893	2.65655
Tpcn2	211.141	-1.13899	0.000341289	0.00233091	2.50291	1.0838	2.14368	2.86214	0.929975	1.23763
Cpt1c	885.416	-1.13891	7.11476e-12	2.65951e-10	27.8415	12.0718	26.696	28.987	11.9057	12.238
Pax8	142.696	-1.13855	0.0015591	0.00859226	6.39567	2.77326	7.40369	5.38766	2.81515	2.73137
Ankrd50	466.095	-1.13836	6.32354e-08	1.15484e-06	6.30625	2.73686	6.71532	5.89719	2.88013	2.59359
Chn2	1853.25	-1.13822	8.1328e-16	5.41129e-14	20.7868	9.02019	22.6343	18.9393	9.3681	8.67228
Cpne5	3013.64	-1.13717	4.62366e-22	7.38343e-20	34.9802	15.1994	35.1648	34.7956	16.0262	14.3726
AU041133	93.004	-1.13708	0.00912171	0.0371568	2.53981	1.10107	2.4346	2.64502	0.929879	1.27227
Golm2	3860.85	-1.13698	2.9292e-20	3.74806e-18	101.721	44.1176	107.636	95.8064	42.3569	45.8783
Rnasek	360.465	-1.13698	1.15571e-06	1.57147e-05	33.3429	14.4964	33.1864	33.4993	16.0045	12.9882
2510009E07Rik	339.017	-1.13691	1.58911e-06	2.08961e-05	7.55037	3.27813	7.39496	7.70577	3.21289	3.34338
Nfatc2	470.668	-1.13645	5.55938e-07	8.15362e-06	6.4664	2.8159	5.93433	6.99847	3.27207	2.35973
Tyk2	2312.33	-1.13549	1.66065e-11	5.77496e-10	47.9662	20.8866	39.1627	56.7697	22.2078	19.5654
Gm15127	95.392	-1.1351	0.00851778	0.0350862	4.82777	2.10127	4.05775	5.59778	2.21046	1.99209
Wdr60	939.911	-1.13489	3.20166e-12	1.27817e-10	15.4421	6.71347	14.8981	15.9862	6.57859	6.84835
Tspan8	596.8	-1.13424	1.82286e-08	3.71287e-07	36.5142	15.8831	40.9388	32.0895	16.2474	15.5189
Dynlt3	424.07	-1.13307	2.35732e-07	3.76738e-06	22.6479	9.87223	23.2497	22.0461	10.8677	8.87681
Kcnc2	1148.07	-1.13212	5.04754e-14	2.58343e-12	8.54393	3.72532	8.40237	8.68549	3.92305	3.5276
Mapre3	758.44	-1.13162	7.67438e-10	2.03139e-08	32.2045	14.0601	30.0225	34.3865	15.5641	12.556
Slc66a2	3817.51	-1.13066	5.48931e-23	9.87136e-21	60.1808	26.2356	62.1593	58.2023	26.0575	26.4136
Platr14	258.972	-1.13058	3.26186e-05	0.000302292	25.998	11.3528	27.5569	24.439	12.7069	9.99877
Cdh20	212.521	-1.13024	0.000117336	0.000932754	4.72626	2.06325	4.35418	5.09833	2.14193	1.98457
Osbpl10	767.526	-1.13001	1.02221e-07	1.75899e-06	8.83621	3.86872	7.59754	10.0749	4.57193	3.16551
Ankrd13d	683.988	-1.12889	3.97884e-09	9.14279e-08	25.6017	11.1624	25.6714	25.5319	10.0425	12.2822
Pnpla7	3759.73	-1.12889	8.32334e-19	8.83735e-17	84.6172	37.0265	80.787	88.4474	40.991	33.062
Rbpms2	960.459	-1.1285	2.21439e-07	3.57328e-06	49.3377	21.4565	47.0905	51.5848	16.3389	26.5741
Hykk	246.148	-1.12778	5.1581e-05	0.000450397	5.5347	2.41766	5.11411	5.95528	2.28424	2.55108
Xkrx	119.443	-1.12722	0.00292264	0.0144153	3.04912	1.33247	2.95213	3.14612	1.26821	1.39672
Kank3	870.885	-1.12608	4.71946e-12	1.83278e-10	9.00574	3.94122	9.12631	8.88516	4.0476	3.83484
Aifm3	779.435	-1.12503	7.21044e-09	1.57643e-07	21.9051	9.59136	18.8098	25.0003	9.38425	9.79847
Fbxo16	582.56	-1.12496	9.50598e-08	1.64856e-06	17.5155	7.67713	19.825	15.206	8.48834	6.86593
Pdgfra	881.089	-1.12473	9.85327e-10	2.54439e-08	11.1062	4.86599	9.64365	12.5687	4.90095	4.83102
Lyve1	145.52	-1.12132	0.00112813	0.00652713	6.39995	2.81165	6.2212	6.5787	3.00258	2.62072
Kank2	2423.53	-1.1211	1.8117e-14	1.00734e-12	57.2202	25.1102	50.8742	63.5662	24.1945	26.0259
Map4k2	1164.47	-1.11999	1.26416e-11	4.47411e-10	13.8039	6.07608	12.6288	14.9791	6.68912	5.46304
Dtx3	366.266	-1.11974	9.32441e-07	1.28984e-05	13.0348	5.72977	12.6837	13.3858	5.83961	5.61993
Smoc1	772	-1.11898	5.8423e-11	1.84964e-09	23.5791	10.3743	23.4407	23.7175	10.9303	9.81839
Fcgr3	177.17	-1.11648	0.000751503	0.00459723	6.98387	3.06957	7.33658	6.63117	2.5783	3.56083
Hyal2	2357.03	-1.11519	9.10468e-17	6.96316e-15	120.813	53.2828	111.226	130.401	54.2205	52.345
Sh2b3	1872.2	-1.11511	5.70984e-12	2.19181e-10	36.3835	16.0587	30.8633	41.9037	16.7191	15.3983
AI413582	1051.47	-1.1148	5.14194e-12	1.98691e-10	77.3258	34.0734	82.8594	71.7921	33.2794	34.8674
Sorcs3	139.418	-1.11462	0.0036601	0.0174158	2.83311	1.25363	2.3684	3.29782	1.54039	0.966864
Vasn	467.559	-1.11187	2.21428e-06	2.79566e-05	16.7736	7.43228	14.8182	18.7289	8.69782	6.16674
Pnpla3	365.347	-1.11046	9.51852e-06	0.000102095	8.01679	3.54226	7.03522	8.99837	3.20208	3.88243
Arhgap31	1323.55	-1.10998	1.34872e-12	5.6322e-11	19.6012	8.68844	18.4924	20.71	9.64108	7.73579
Igsf5	194.944	-1.10875	0.000366213	0.00248217	8.19585	3.63626	8.2364	8.1553	4.25263	3.0199
Rnf14	3047.16	-1.10856	6.09596e-21	8.33435e-19	80.5169	35.6468	82.717	78.3167	35.5319	35.7616
Gm35588	406.807	-1.10741	3.57976e-07	5.47574e-06	16.6783	7.39386	16.8173	16.5392	7.56844	7.21928
Ddx25	6871.49	-1.1066	4.80881e-22	7.61814e-20	468.885	208.304	479.43	458.34	229.142	187.466
Nxpe4	355.571	-1.10617	2.93297e-06	3.60721e-05	7.53942	3.34524	6.95199	8.12686	3.34839	3.34209
Arhgap33	783.261	-1.10545	4.03657e-06	4.78468e-05	15.4364	6.88366	12.1257	18.7472	8.42909	5.33822
Fhad1	274.917	-1.1046	1.97963e-05	0.000196009	5.19981	2.31047	5.39394	5.00569	2.45069	2.17025
Ccng2	186.606	-1.10454	0.00133145	0.00749916	8.55759	3.81189	9.69549	7.41968	4.81028	2.8135
Gm38424	92.4794	-1.10374	0.012934	0.0495134	2.27308	1.00853	2.00148	2.54469	0.843323	1.17374
Fxyd5	321.484	-1.10077	5.09231e-06	5.90975e-05	26.0281	11.595	26.822	25.2341	12.1893	11.0007
Rnf5	172.24	-1.09983	0.000780675	0.00474948	4.45963	1.98605	4.03424	4.88501	1.85469	2.11741
Chd5	88.4996	-1.0973	0.012965	0.049606	1.0434	0.465032	1.06754	1.01925	0.404826	0.525238
Rnf25	1888.22	-1.09718	9.35085e-17	7.12413e-15	136.489	60.9605	141.649	131.329	64.0556	57.8655
Ccdc189	467.223	-1.09706	1.57168e-07	2.60567e-06	19.0323	8.50054	17.9891	20.0754	8.75461	8.24646
Zfp874a	191.535	-1.09694	0.00199582	0.0105757	6.75163	3.02082	8.41878	5.08447	3.67647	2.36518
Sik3	452.68	-1.09679	9.42219e-07	1.29977e-05	8.21592	3.67088	9.19317	7.23866	3.97879	3.36297
Gulo	378.702	-1.09617	2.90715e-06	3.58208e-05	18.6822	8.3451	16.9144	20.45	8.1769	8.5133
Kcnh3	310.338	-1.09392	0.000178743	0.00134892	7.75236	3.48355	6.86643	8.63828	4.43786	2.52924
Tdrp	317.314	-1.09261	1.18475e-05	0.000124011	11.8237	5.30037	10.852	12.7954	5.67783	4.92292
Efhc1	603.824	-1.09226	3.20365e-07	4.94955e-06	29.2249	13.128	29.9581	28.4918	15.7884	10.4677
Ppp2r5c	728.761	-1.09207	8.81526e-08	1.55032e-06	13.6444	6.12516	15.2067	12.082	7.1404	5.10992
Utrn	1911.53	-1.09094	2.99862e-14	1.60042e-12	10.0867	4.53149	9.84361	10.3298	5.08911	3.97387
Gtpbp2	370.92	-1.08914	3.4616e-05	0.000316959	8.4304	3.79303	9.67462	7.18617	4.54776	3.0383
Lrrc51	700.028	-1.08875	2.26895e-09	5.44356e-08	49.0243	22.0333	51.3238	46.7248	23.9658	20.1008
Zfp640	218.103	-1.08856	0.000297981	0.00208409	18.6676	8.396	20.4935	16.8417	9.71657	7.07542
Egr1	11352	-1.0884	1.62686e-20	2.10868e-18	420.75	189.227	453.414	388.085	206.423	172.032
Tph1	126.755	-1.08684	0.00424358	0.0197358	3.01368	1.35755	3.23204	2.79532	1.61642	1.09868
Cubn	163.029	-1.08601	0.00130053	0.00735199	1.63899	0.738353	1.79014	1.48784	0.848961	0.627744
Ubr1	112.004	-1.08556	0.0125506	0.0483539	1.58678	0.717454	1.40395	1.76961	0.963734	0.471175
Rbmx	425.076	-1.08445	3.6335e-06	4.35082e-05	12.8779	5.78743	13.7699	11.9859	5.05561	6.51925
Ctsf	4364.04	-1.0833	7.1858e-16	4.8458e-14	245.763	110.608	226.57	264.955	102.581	118.635
Wnt3	136.927	-1.08209	0.00216176	0.0112784	4.56574	2.0607	4.51972	4.61175	2.1714	1.95001
Fkbpl	246.944	-1.08135	7.60842e-05	0.000633062	4.09428	1.8481	3.83023	4.35833	1.85019	1.84601
Fsd1	5657.14	-1.08119	3.85817e-22	6.21071e-20	357.416	161.499	370.122	344.71	173.242	149.756
Arid2	1478.62	-1.08079	1.52238e-14	8.56006e-13	18.6102	8.40006	19.3999	17.8204	8.4151	8.38503
Gramd4	298.91	-1.07993	2.20782e-05	0.00021435	3.93506	1.77874	3.59762	4.27251	1.83443	1.72304
Ldb1	861.98	-1.07966	1.36396e-10	4.06357e-09	14.3215	6.47474	13.5127	15.1303	6.69619	6.2533
Unc5a	169.044	-1.07947	0.00117779	0.00677517	2.32485	1.05214	2.03541	2.61429	1.15396	0.95033
Haus5	945.734	-1.07935	1.00763e-11	3.62401e-10	48.9436	22.1193	49.8752	48.012	22.366	21.8725
Alkbh7	679.849	-1.07664	4.01002e-09	9.20045e-08	82.2186	37.2368	87.8531	76.5841	38.7816	35.692
Ank	289.803	-1.07405	6.69221e-05	0.000565551	9.40497	4.26418	10.8748	7.93511	4.30528	4.22309
Cacna2d1	161.934	-1.07307	0.00141676	0.00791492	1.58652	0.719137	1.56732	1.60573	0.632375	0.805899
Trim24	772.836	-1.07235	8.16577e-10	2.14188e-08	13.6205	6.18111	14.1371	13.104	5.96315	6.39907
Hs3st1	387.417	-1.07167	1.348e-05	0.000138698	18.3966	8.38246	17.7437	19.0496	10.079	6.68591
Tcirg1	487.765	-1.07026	8.47685e-06	9.21603e-05	16.6223	7.58602	17.4725	15.7721	9.43105	5.74099
Zfp534	313.137	-1.06966	8.78167e-05	0.00071929	4.18465	1.90552	4.95816	3.41114	2.11457	1.69647
Tmem132c	371.845	-1.06902	4.19868e-06	4.95917e-05	8.24418	3.75801	8.13197	8.3564	4.19346	3.32256
Foxo3	2853.91	-1.06876	6.67521e-17	5.24582e-15	47.6444	21.7202	44.8932	50.3957	23.2799	20.1605
Lonrf2	194.215	-1.06792	0.00155151	0.00857021	3.19649	1.45162	3.72676	2.66622	1.18653	1.71672
Fasn	2853.61	-1.06785	0.00370408	0.0176041	30.9581	14.1555	23.959	37.9572	16.0643	12.2466
Tcn2	1268.31	-1.06717	1.63175e-13	7.90568e-12	63.5689	28.9779	62.4999	64.6379	29.4405	28.5153
Zfp710	3649.37	-1.0665	1.56409e-19	1.84738e-17	67.5259	30.7952	64.1929	70.8589	31.0862	30.5042
Gm34469	278.495	-1.0662	3.38733e-05	0.000311503	24.4714	11.1695	23.8493	25.0935	11.8814	10.4576
Sema6d	1011.42	-1.06476	2.35633e-09	5.61944e-08	6.74922	3.08807	6.06666	7.43177	3.46575	2.71039
Irs4	155.057	-1.0646	0.00338964	0.0163169	2.81201	1.28284	3.46896	2.15506	1.28007	1.28561
Arap1	396.775	-1.06441	5.66683e-05	0.000489466	6.10339	2.79338	4.75103	7.45575	3.0887	2.49805
Rilp	123.415	-1.06393	0.00413685	0.019325	9.38001	4.28446	9.06043	9.69958	4.22848	4.34044
Atg2a	2034.95	-1.06282	0.0080038	0.0333536	17.823	8.17594	13.2273	22.4187	9.14909	7.20279
Pstpip2	169.075	-1.06271	0.00340512	0.0163822	3.53844	1.61588	2.71676	4.36011	1.40231	1.82945
Zfp418	190.841	-1.06183	0.000474953	0.0031145	7.99882	3.6622	7.91821	8.07943	3.93907	3.38534
Fos	4577.91	-1.05955	0.00493935	0.0222963	245.723	112.223	305.441	186.005	102.875	121.571
Ccdc112	212.122	-1.0569	0.000244771	0.00176004	6.77101	3.10913	6.80792	6.73411	3.21978	2.99849
Tada3	1460.21	-1.05584	4.97925e-13	2.26403e-11	73.3585	33.7404	69.7221	76.995	36.2808	31.2
Adgrl3	343.266	-1.0538	6.38479e-05	0.000542096	2.18938	1.0101	1.91922	2.45955	1.1964	0.823793
Inpp4a	986.331	-1.05376	2.39029e-10	6.85525e-09	10.4197	4.80068	10.7394	10.1	5.35404	4.24732
Gnb4	1430.61	-1.05211	3.59512e-11	1.1803e-09	19.425	8.95226	17.1641	21.686	9.17281	8.73172
Unkl	392.141	-1.05176	1.37672e-05	0.000141216	3.99672	1.84424	3.44871	4.54472	2.02087	1.66761
Parn	2603.17	-1.05129	1.29224e-13	6.32214e-12	95.8852	44.3013	95.3926	96.3778	50.8283	37.7744
Map4k3	897.205	-1.04916	1.83301e-09	4.45661e-08	15.0323	6.93749	16.6548	13.4098	7.17347	6.70151
Morn4	675.158	-1.04878	9.96172e-09	2.11538e-07	39.6595	18.3097	37.3982	41.9208	18.3462	18.2731
Tjp1	4788.84	-1.04812	4.09977e-21	5.72276e-19	62.6572	28.922	64.8801	60.4343	28.7067	29.1374
Zfp105	1797.08	-1.04802	3.33137e-14	1.76386e-12	31.6878	14.6299	30.1225	33.2531	14.3026	14.9572
Gm4316	783.75	-1.04772	7.03599e-08	1.26985e-06	63.157	29.2598	60.978	65.3359	34.5805	23.9392
Capg	1328.98	-1.04716	1.56708e-12	6.4763e-11	75.8649	35.0624	71.5562	80.1736	35.1106	35.0143
Rilpl2	874.026	-1.04671	1.28768e-09	3.24128e-08	78.2233	36.2185	74.6574	81.7893	39.9759	32.4611
Aipl1	137.488	-1.04632	0.00379611	0.017973	4.55699	2.1107	4.13896	4.97502	2.37595	1.84546
Muc3	196.153	-1.04204	0.000533504	0.00343858	3.69852	1.7158	3.92292	3.47412	1.79394	1.63767
Zfhx3	974.661	-1.041	1.76786e-09	4.31396e-08	4.28064	1.99109	4.18234	4.37895	2.2758	1.70637
Hacl1	674.338	-1.03872	1.38863e-08	2.90854e-07	28.9986	13.4961	28.9197	29.0775	14.7548	12.2374
Lzts1	2696.46	-1.03817	2.27701e-15	1.4338e-13	53.6184	24.9411	58.24	48.9968	26.0421	23.8401
Prxl2c	2787.47	-1.0377	1.87061e-16	1.35779e-14	104.238	48.5502	107.839	100.638	52.7464	44.3539
Kif17	408.772	-1.03612	6.72255e-06	7.53024e-05	11.739	5.46679	10.4509	13.027	5.368	5.56558
Kifc2	212.81	-1.03599	0.00160469	0.0087998	5.79989	2.7124	5.48	6.11978	3.50224	1.92256
Btbd2	152.186	-1.03563	0.00209545	0.0109841	6.95601	3.23959	7.27926	6.63277	3.21528	3.26391
4933431E20Rik	325.412	-1.03562	0.000106928	0.00085787	6.77224	3.16495	6.43544	7.10904	3.87103	2.45888
Fam214a	2780.69	-1.03539	2.84975e-11	9.5603e-10	25.8774	12.0983	26.8238	24.931	14.3988	9.79785
Atg16l2	306.616	-1.03461	0.000168711	0.00128683	5.34066	2.49762	5.46548	5.21585	3.09468	1.90056
Lss	2834.73	-1.03357	1.99843e-17	1.70022e-15	46.4479	21.6757	48.7357	44.1601	22.5262	20.8251
Gm4924	940.597	-1.0334	6.08973e-08	1.11623e-06	30.7456	14.3721	34.676	26.8152	16.5125	12.2316
Cpt1a	1295.53	-1.03234	1.35616e-08	2.84652e-07	29.436	13.7503	24.2208	34.6513	13.7532	13.7473
Uty	1084.33	-1.03188	1.95935e-10	5.70957e-09	8.94703	4.17929	8.20328	9.69077	4.17452	4.18406
Cox7a1	109.597	-1.03181	0.010442	0.0416614	33.6433	15.687	36.4578	30.8288	13.7157	17.6582
Mpped2	1736.41	-1.03124	4.5437e-10	1.24755e-08	37.1966	17.3638	32.2618	42.1314	16.1987	18.5289
Zfp819	778.168	-1.03057	8.7131e-08	1.53371e-06	35.1502	16.4463	39.8669	30.4334	17.9808	14.9119
Pnpla2	953.488	-1.02901	4.44327e-08	8.383e-07	39.3913	18.458	33.184	45.5985	19.4155	17.5004
Spire2	208.437	-1.02625	0.000498449	0.00324512	10.0326	4.70814	10.5858	9.47936	5.14223	4.27405
Nbeal1	1190.56	-1.02546	2.7865e-12	1.12515e-10	7.37602	3.46088	7.46817	7.28386	3.53225	3.38952
Asb7	507.167	-1.02498	8.18394e-07	1.14638e-05	4.56434	2.14476	4.79891	4.32977	2.38732	1.90221
F2rl1	339.565	-1.02338	1.27927e-05	0.000132583	13.7607	6.46789	13.7162	13.8052	6.73171	6.20408
Septin3	231.787	-1.02212	0.00206273	0.0108694	3.80777	1.79773	4.33591	3.27963	2.35272	1.24274
Ssbp2	5769.83	-1.02162	2.37991e-19	2.69917e-17	64.1147	30.1257	63.5498	64.6797	28.8167	31.4347
Dnah8	517.735	-1.02095	3.31516e-07	5.10207e-06	3.78999	1.78312	3.67884	3.90114	1.74503	1.82122
2810408A11Rik	159.16	-1.01984	0.00546627	0.0243337	4.09421	1.93544	4.3773	3.81112	2.51624	1.35464
Ppp1r18	602.215	-1.01871	2.53409e-05	0.000242256	5.69307	2.68742	4.26476	7.12137	2.80954	2.5653
Gm973	1043.24	-1.01591	1.16386e-10	3.50404e-09	12.8487	6.06413	13.4031	12.2944	5.92368	6.20458
Pheta1	1185.55	-1.01543	6.19796e-08	1.13398e-06	55.9444	26.4653	45.6133	66.2756	27.7752	25.1554
Emilin2	203.451	-1.01222	0.000793218	0.00481699	5.44406	2.57448	5.39811	5.49002	2.32103	2.82793
Sec16a	1599.13	-1.01149	1.27828e-10	3.814e-09	18.8534	8.93438	16.5354	21.1714	8.99917	8.86958
Zmym6	1394.23	-1.011	3.94195e-10	1.0959e-08	29.5269	13.9861	33.3866	25.6673	14.186	13.7862
Llgl1	6902.56	-1.01069	2.33035e-13	1.09967e-11	173.745	82.5341	151.211	196.279	90.1418	74.9263
Lrrc56	544.443	-1.00999	1.71265e-06	2.2344e-05	17.4389	8.28898	16.8047	18.0732	9.62433	6.95364
Mov10	5820.57	-1.00968	8.00935e-15	4.68841e-13	141.388	67.1436	125.139	157.638	70.4748	63.8124
Oasl2	583.038	-1.00923	9.72245e-06	0.000103892	20.738	9.87726	19.3448	22.1312	12.178	7.57648
Srf	332.639	-1.00725	2.80358e-05	0.000264347	5.66777	2.69561	5.79792	5.53763	2.95673	2.43448
Dbx2	205.217	-1.00563	0.00114874	0.0066329	10.1004	4.81594	9.96584	10.235	5.76967	3.86222
Ccdc51	110.02	-1.00442	0.0100258	0.0402099	5.1254	2.43944	5.16694	5.08386	2.41373	2.46514
Nckipsd	394.596	-1.00382	1.32664e-05	0.000136853	6.63416	3.15701	6.19711	7.07121	2.94807	3.36596
6330403K07Rik	458.722	-1.00304	5.27957e-06	6.10223e-05	16.0214	7.62192	16.8618	15.181	6.8951	8.34875
Wdr93	253.448	-1.00294	0.000473272	0.00310552	9.36755	4.47458	9.87664	8.85846	5.37579	3.57337
Ddt	996.068	-1.00199	1.33169e-09	3.34362e-08	182.543	87.1642	171.411	193.676	94.5842	79.7442
Fli1	127.294	-1.00124	0.0112272	0.0442112	3.37471	1.61531	2.85429	3.89512	1.98058	1.25004
Cd82	2187.66	-1.00087	2.30665e-11	7.83044e-10	114.442	54.5478	103.701	125.182	50.763	58.3325
Ccz1	315.841	-1.00084	6.89958e-05	0.000581598	18.4731	8.82399	20.0812	16.8649	9.71623	7.93174
Arhgap45	353.25	-1.00001	0.000173343	0.00131444	8.86709	4.22551	7.6876	10.0466	3.56433	4.8867
Ccdc30	242.599	-0.998328	0.000926755	0.00551056	1.90669	0.90937	2.22327	1.5901	0.797362	1.02138
Cbln2	2708.51	-0.997578	2.84561e-14	1.53517e-12	95.1309	45.441	100.516	89.7455	43.2789	47.6031
Wnk4	196.231	-0.996538	0.00191662	0.0102048	5.10592	2.45058	4.55919	5.65264	2.91886	1.98229
Cers3	200.423	-0.992303	0.00111104	0.00644134	6.20886	2.98548	6.37401	6.04371	3.42985	2.54112
C330024D21Rik	113.935	-0.991214	0.0122539	0.0475878	3.3898	1.62754	2.97724	3.80236	1.50188	1.75321
B4gat1	2156.81	-0.989249	4.49032e-11	1.45979e-09	117.917	56.5954	116.07	119.764	50.1723	63.0185
St18	135.238	-0.988552	0.00559272	0.0247695	1.50621	0.724436	1.49849	1.51394	0.681557	0.767315
Coch	327.403	-0.987494	0.000109273	0.000874933	10.1312	4.89127	9.61492	10.6474	5.72589	4.05665
Kdm5b	15268.2	-0.986929	3.64731e-22	5.91903e-20	215.643	104.044	212.888	218.398	111.457	96.6301
Egr2	8045.35	-0.986329	6.62614e-19	7.11099e-17	123.624	59.518	122.842	124.407	56.7148	62.3213
Cep350	558.724	-0.98608	4.61764e-07	6.89399e-06	4.6177	2.22533	4.8921	4.34329	2.20028	2.25038
Gm7240	159.661	-0.984162	0.00590704	0.0259372	3.76903	1.81436	3.62024	3.91783	1.41083	2.2179
Dop1b	1131.8	-0.983663	4.78342e-07	7.1149e-06	9.75345	4.71642	7.76856	11.7383	4.91212	4.52072
Lpp	1917.44	-0.982649	2.90824e-14	1.56052e-12	10.0023	4.83395	9.8438	10.1608	4.87358	4.79431
Slc26a6	275.849	-0.981568	0.00024005	0.00173359	4.7465	2.29334	4.44475	5.04824	2.09677	2.48992
Rorc	215.454	-0.981427	0.0018288	0.0098094	6.7336	3.26625	7.27267	6.19453	4.04137	2.49113
Asns	771.816	-0.981195	1.48485e-07	2.46786e-06	36.2656	17.5823	36.8762	35.655	20.2906	14.8739
Hoxb13	134.028	-0.980545	0.00949697	0.0383976	10.8688	5.2465	11.8471	9.89044	4.28838	6.20461
Ndrg1	664.567	-0.980236	5.76195e-06	6.60572e-05	25.5365	12.4041	22.7541	28.319	14.8087	9.99947
Glis3	2363.98	-0.979585	3.33638e-12	1.32929e-10	21.4724	10.4237	21.1829	21.7619	11.8307	9.01676
E130307A14Rik	720.282	-0.978803	6.12195e-07	8.89376e-06	48.0706	23.3557	47.1834	48.9578	27.458	19.2534
Rai14	1808.66	-0.977825	1.28142e-13	6.30013e-12	38.1219	18.4784	38.9325	37.3112	18.3546	18.6022
Zfp516	216.377	-0.976137	0.00197176	0.0104732	1.52223	0.739978	1.20686	1.8376	0.782815	0.697142
Kcnab3	1387.36	-0.975722	1.34278e-09	3.36723e-08	60.6693	29.5338	57.7391	63.5995	33.7384	25.3291
Fam110b	311.545	-0.974997	7.70916e-05	0.000639844	8.83233	4.29586	8.59108	9.07358	4.67494	3.91677
Clstn3	332.765	-0.974312	0.000943019	0.00558896	9.07438	4.43348	9.111	9.03776	5.89525	2.97172
Plcb4	893.354	-0.973997	1.91884e-09	4.65395e-08	4.18371	2.03345	4.23746	4.12995	2.01588	2.05103
Fer1l6	255.208	-0.973705	0.000324512	0.00223794	3.1735	1.54293	3.46291	2.88408	1.56432	1.52154
Cyp4f13	935.739	-0.973032	1.64159e-07	2.71031e-06	52.9686	25.8062	59.7292	46.208	28.9546	22.6579
Ywhag	1774	-0.971531	4.19503e-09	9.59186e-08	54.702	26.6702	46.0347	63.3693	27.7139	25.6265
Wdfy4	272.023	-0.971164	0.000334437	0.00229326	2.74086	1.33762	2.50675	2.97497	1.50844	1.16679
Zfp28	207.83	-0.970267	0.00706125	0.030111	3.81034	1.86855	3.35318	4.26749	2.56124	1.17585
Vps13d	439.505	-0.969842	5.06319e-05	0.000443468	2.59245	1.26137	2.97459	2.2103	1.13681	1.38594
Wdr24	1215.9	-0.969795	3.81971e-08	7.26837e-07	43.4368	21.1791	36.9439	49.9297	20.7287	21.6294
Dlx3	1642.46	-0.966798	8.42812e-10	2.19652e-08	69.6785	34.1219	63.0968	76.2602	38.0578	30.186
Grtp1	632.228	-0.966028	2.23788e-07	3.60827e-06	16.846	8.23753	15.9052	17.7867	8.33835	8.13672
Chd2	727.779	-0.965722	1.02083e-07	1.75899e-06	8.88326	4.34957	9.18366	8.58285	4.8212	3.87793
Mtarc2	1169.96	-0.965657	2.44251e-08	4.88037e-07	62.9743	30.7442	57.9008	68.0478	27.6574	33.8309
D430042O09Rik	812.756	-0.965029	5.17238e-08	9.58643e-07	11.4218	5.59614	10.7015	12.1422	6.12682	5.06546
Amot	824.116	-0.964315	8.95511e-09	1.92001e-07	9.85982	4.82487	9.64771	10.0719	4.76676	4.88298
LOC115486415	122.529	-0.96408	0.0105522	0.0419919	8.42145	4.11738	8.56797	8.27492	3.7016	4.53316
Zscan2	135.922	-0.963288	0.00820164	0.034036	2.90946	1.42505	2.52685	3.29207	1.38401	1.46608
Notch1	367.997	-0.96275	0.000303281	0.0021108	4.2882	2.10784	3.55049	5.02592	2.48374	1.73193
4930550C14Rik	149.636	-0.962314	0.00473495	0.0215688	3.36283	1.6482	3.14728	3.57837	1.62592	1.67049
Dtd1	1198.58	-0.96142	2.5042e-09	5.95076e-08	103.262	50.7051	93.5449	112.98	53.9152	47.495
Fuz	122.338	-0.960927	0.0115625	0.0453084	3.8792	1.90662	3.55181	4.20658	2.17163	1.64161
Mapkapk5	743.784	-0.958745	4.3779e-08	8.2753e-07	37.2151	18.2745	37.2279	37.2023	17.6487	18.9003
Ptbp3	6369.49	-0.958174	2.66729e-18	2.62275e-16	93.6339	46.0442	88.8501	98.4177	47.1166	44.9718
Dusp6	7409.43	-0.95738	1.2768e-14	7.24038e-13	292.5	143.742	266.656	318.343	137.984	149.5
Smurf1	421.625	-0.956494	1.97433e-05	0.000195581	8.3929	4.1247	8.78488	8.00093	3.78867	4.46074
Slc44a1	663.709	-0.956178	3.16069e-07	4.89073e-06	9.15835	4.51482	9.12651	9.19018	5.02744	4.0022
Hes1	1041.33	-0.955947	3.09274e-09	7.2128e-08	66.5301	32.7647	71.7599	61.3003	34.3977	31.1318
Cdk2ap2	4356.58	-0.955855	2.42674e-17	2.01834e-15	150.597	74.1777	157.272	143.923	77.441	70.9143
Abca7	492.558	-0.955844	0.000223095	0.00162466	8.03828	3.96858	6.02985	10.0467	4.45492	3.48225
Zfp983	257.846	-0.955359	0.00108955	0.00634594	6.14151	3.01623	6.09569	6.18733	2.42467	3.60778
Mef2d	1318.87	-0.955356	7.57745e-08	1.35048e-06	24.9356	12.2969	20.7799	29.0913	12.9025	11.6912
Plxnb1	368.269	-0.95528	3.66287e-05	0.000333856	3.40391	1.67745	3.16072	3.6471	1.73132	1.62358
Lrriq3	173.293	-0.954831	0.00552918	0.024559	3.06104	1.51332	2.95875	3.16333	1.90466	1.12198
Tnik	383.831	-0.953557	2.30897e-05	0.000223301	2.17684	1.07453	2.17785	2.17582	1.16715	0.981903
Flot1	933.867	-0.952209	6.76662e-09	1.49247e-07	19.793	9.77178	21.138	18.448	10.1637	9.37991
Brwd3	1336.88	-0.95016	4.85754e-11	1.56895e-09	11.5159	5.69704	11.7226	11.3092	6.08692	5.30716
Zfp462	2896.47	-0.949498	1.82809e-12	7.50831e-11	16.093	7.97657	15.8802	16.3059	9.00742	6.94572
Capns1	357.018	-0.948507	6.81094e-05	0.000574369	16.8297	8.34223	16.3895	17.2699	9.42143	7.26303
Prdm16	948.869	-0.948209	8.31063e-08	1.46674e-06	10.9802	5.44255	9.75517	12.2053	5.85276	5.03234
Ric8b	2096.35	-0.947893	7.30769e-13	3.21297e-11	40.5086	20.0817	39.8849	41.1322	21.808	18.3554
Ano10	1656.03	-0.946415	1.67021e-11	5.79809e-10	56.1754	27.8417	52.7196	59.6311	27.9595	27.7238
Fndc4	406.955	-0.946342	2.84334e-05	0.000267464	19.111	9.46058	20.3943	17.8276	8.88557	10.0356
Shcbp1	1111.02	-0.945548	4.32092e-10	1.19294e-08	56.4319	28.0023	57.2708	55.5931	29.6558	26.3488
Zer1	197.587	-0.944702	0.00329705	0.0159468	3.31559	1.64747	3.83754	2.79364	1.9037	1.39123
Sema4b	424.421	-0.944505	4.47503e-05	0.000399134	11.2447	5.57042	10.737	11.7524	4.89529	6.24554
Cdkl3	849.103	-0.943869	6.36783e-08	1.16081e-06	7.34549	3.65063	7.84453	6.84645	4.0023	3.29896
Crebrf	666.466	-0.943813	3.03987e-06	3.72492e-05	9.69592	4.81906	10.9599	8.43197	5.34723	4.29089
Etnk2	996.993	-0.943801	2.00277e-07	3.25548e-06	23.5717	11.7346	21.7032	25.4402	13.5564	9.91275
Osbpl7	232.716	-0.943097	0.0011074	0.00642581	6.47585	3.22235	6.85259	6.0991	3.73948	2.70522
Lpgat1	647.374	-0.942802	1.19126e-06	1.61651e-05	8.59414	4.26277	8.79497	8.39332	3.85905	4.66649
Sptbn1	4746.29	-0.942801	2.41157e-16	1.72536e-14	35.8825	17.8076	36.0809	35.6841	17.0927	18.5225
Pik3r6	199.103	-0.94198	0.00286397	0.0141856	5.85855	2.92006	5.88903	5.82807	3.54611	2.294
Map3k12	1835.32	-0.941697	8.99172e-12	3.27525e-10	31.6439	15.7505	29.8373	33.4505	16.7448	14.7562
Man2b1	1441.31	-0.94142	4.90437e-10	1.33738e-08	32.2908	16.08	29.8578	34.7239	17.3078	14.8521
Nrxn2	899.11	-0.941395	3.65375e-07	5.56898e-06	7.42326	3.69976	6.61643	8.23008	4.15012	3.2494
Dgkq	405.138	-0.94016	0.000171162	0.00130155	8.46042	4.20642	7.10178	9.81906	3.79911	4.61374
Lrguk	301.159	-0.940074	0.000482704	0.0031591	2.76584	1.37331	2.91831	2.61337	1.15823	1.58839
Slc25a44	615.131	-0.938974	3.01976e-06	3.70482e-05	18.8649	9.3933	16.8465	20.8834	8.99743	9.78917
Tspan31	1818.65	-0.938255	6.18138e-13	2.74803e-11	111.109	55.4017	111.892	110.326	57.7153	53.0882
Zdhhc1	164.594	-0.937552	0.00571072	0.025186	6.80863	3.40344	6.45996	7.15729	4.0638	2.74308
Cul7	2482.87	-0.937326	0.0113277	0.0445631	49.3174	24.6344	36.8406	61.7941	25.6067	23.6621
Abcc8	360.409	-0.936901	0.0028906	0.0142898	6.12378	3.07624	5.75146	6.4961	4.29823	1.85425
Zfp119b	423.005	-0.936802	1.971e-05	0.000195348	9.45495	4.71228	9.71555	9.19435	4.42983	4.99473
Prpf40b	1589.53	-0.936661	5.55089e-10	1.49934e-08	42.256	21.1277	40.5066	44.0055	23.7453	18.5101
Ksr1	180.673	-0.936314	0.00565629	0.0249956	2.5938	1.29054	2.6212	2.56641	1.01211	1.56896
Fnbp1	1042.87	-0.936146	2.10335e-09	5.07064e-08	8.7187	4.35587	8.53455	8.90286	4.65965	4.05209
2610507B11Rik	3012.84	-0.936012	1.94965e-14	1.08103e-12	40.6338	20.2805	38.6659	42.6017	20.2188	20.3422
Ppm1m	436.467	-0.933948	0.000244158	0.00175702	23.1369	11.5471	18.9467	27.3271	10.0703	13.024
Myof	438.834	-0.933569	5.08798e-05	0.000445248	6.70686	3.36205	6.61338	6.80035	3.9761	2.74799
Flii	2793.83	-0.932371	3.94102e-11	1.29174e-09	75.526	37.8122	66.6215	84.4305	38.3297	37.2948
Gstt3	364.7	-0.93212	5.35408e-05	0.000464866	21.1493	10.5967	21.408	20.8907	11.5901	9.60321
Rgs16	524.293	-0.93152	0.000140229	0.00109511	24.6509	12.3954	21.5323	27.7694	15.3406	9.45021
1700048O20Rik	234.929	-0.931405	0.00117117	0.00674291	13.9633	6.99049	15.8373	12.0893	7.13637	6.84461
A530072M11Rik	249.874	-0.931362	0.000499031	0.00324573	14.8141	7.42162	15.0468	14.5814	7.76414	7.0791
Afp	2785.12	-0.92998	4.90007e-09	1.10395e-07	146.613	73.6952	162.109	131.116	86.2668	61.1237
Zdhhc8	350.933	-0.929797	0.000630107	0.00395645	2.26802	1.13707	1.76448	2.77156	1.09847	1.17566
Gm33205	167.583	-0.928809	0.0047611	0.0216484	5.18501	2.60106	4.61798	5.75204	2.54483	2.65728
Gm10509	667.434	-0.927925	2.70512e-07	4.24503e-06	24.7804	12.4483	25.0976	24.4632	13.2737	11.6229
Chchd10	1258.91	-0.926047	1.62414e-09	3.98764e-08	92.6074	46.6093	96.1689	89.0458	51.3585	41.86
Samd4	279.327	-0.925067	0.00114251	0.00660056	3.63853	1.83495	3.08413	4.19292	2.13367	1.53623
Gnaz	1177.21	-0.924828	2.57104e-08	5.08627e-07	24.6808	12.3943	23.7838	25.5779	11.185	13.6035
Sirt5	230.865	-0.924635	0.00169809	0.00920075	7.98943	4.01159	7.80304	8.17582	3.41411	4.60907
Cdkn1b	179.14	-0.924341	0.00620884	0.0270304	8.1664	4.1227	7.38745	8.94535	5.05904	3.18635
Mvd	1517.95	-0.924181	4.88197e-11	1.57217e-09	89.2333	44.8797	88.4338	90.0327	43.5462	46.2132
Msantd4	1285.83	-0.923858	5.16006e-10	1.39756e-08	49.7797	25.0406	48.8175	50.7418	24.1121	25.9691
Ift43	2439.35	-0.922522	2.56748e-14	1.39265e-12	330.326	166.443	332.52	328.133	169.116	163.77
Grina	1280.48	-0.92173	1.10367e-09	2.81719e-08	66.4591	33.5372	62.3661	70.5521	35.5256	31.5488
Phf3	982.103	-0.921495	4.35474e-09	9.91162e-08	12.7136	6.40929	13.0783	12.3489	6.4459	6.37267
Figla	373.269	-0.92124	5.49502e-05	0.000476068	31.7989	16.043	33.7077	29.89	16.9374	15.1486
Atp8b2	173.036	-0.921079	0.00494433	0.0223138	3.23239	1.62938	2.86931	3.59547	1.52506	1.7337
Fzd2	170.935	-0.921015	0.00507035	0.0228206	5.15578	2.59772	4.7549	5.55666	2.3452	2.85024
Tma7	349.273	-0.920442	0.000173052	0.00131301	60.0648	30.2951	67.9346	52.1951	30.5875	30.0028
Afap1l1	797.743	-0.918815	2.12521e-06	2.70199e-05	25.6712	13.0039	26.3863	24.9562	15.4266	10.5812
Rev3l	512.302	-0.91758	3.78502e-06	4.52141e-05	4.09504	2.0716	4.14079	4.04929	2.18753	1.95566
Ocrl	344.254	-0.917391	0.000190121	0.00142242	6.51724	3.30221	6.45156	6.58293	3.82598	2.77844
Cetn1	153.075	-0.916065	0.008518	0.0350862	15.9273	8.04568	17.3255	14.5291	7.0431	9.04826
Fam117b	1782.24	-0.915866	9.9921e-12	3.60022e-10	35.2211	17.8411	33.8233	36.6189	18.665	17.0173
Aqr	5707.43	-0.915228	9.02749e-16	5.94712e-14	122.424	61.9866	115.449	129.399	61.6971	62.2761
Ankrd45	1300.6	-0.91417	2.8826e-06	3.55622e-05	35.1681	17.894	38.1725	32.1638	22.1647	13.6232
Fsip2l	1057.44	-0.91393	5.74699e-09	1.27985e-07	51.8089	26.2832	53.7055	49.9123	28.2851	24.2814
Mmp11	201.009	-0.913077	0.00222292	0.0115371	9.37875	4.76222	9.06176	9.69575	5.22923	4.29521
Wdr90	1895.41	-0.911946	3.86366e-07	5.86483e-06	34.1055	17.3375	27.1413	41.0698	18.2423	16.4327
Rnf122	869.883	-0.911862	3.07004e-07	4.77267e-06	17.161	8.69572	17.0822	17.2399	7.83688	9.55456
Tmco6	1487.77	-0.911573	2.21959e-10	6.40575e-09	82.2049	41.7028	80.2842	84.1257	40.0673	43.3383
Tent4b	354.651	-0.911515	7.78942e-05	0.000645433	7.60673	3.86088	7.8005	7.41295	3.82493	3.89682
4933412E12Rik	1063.58	-0.91072	9.25814e-09	1.97438e-07	67.3804	34.2532	63.1163	71.6444	35.7313	32.7751
Pde4c	616.934	-0.909697	3.93861e-06	4.67411e-05	9.18621	4.66246	9.17996	9.19247	4.21242	5.11251
Tspan18	514.916	-0.909545	0.000190727	0.00142641	9.83161	4.99008	12.0937	7.56954	4.78634	5.19382
Sertad3	630.974	-0.908938	8.71627e-07	1.21413e-05	54.8124	27.9008	53.2529	56.3718	29.5797	26.2218
Plcb3	2851.51	-0.908878	5.49579e-11	1.75304e-09	59.8184	30.5022	57.3057	62.3312	34.5567	26.4477
Hs1bp3	408.897	-0.90874	4.35404e-05	0.00038991	14.8592	7.56368	13.7675	15.9509	7.87394	7.25341
Cdyl2	1783.33	-0.908577	2.09331e-10	6.08219e-09	10.448	5.30752	10.4926	10.4035	4.93161	5.68344
Inppl1	1482.08	-0.908077	1.13221e-07	1.92998e-06	31.3745	16.0052	27.0859	35.6631	17.8255	14.1849
Tmem169	235.159	-0.907403	0.00106537	0.00622722	8.33866	4.24877	7.90383	8.77349	4.4781	4.01945
Chn1	2133.4	-0.907196	4.68718e-13	2.14336e-11	40.5914	20.6705	41.4802	39.7025	21.0151	20.3259
Stx1b	155.62	-0.905323	0.0115626	0.0453084	3.42883	1.75235	2.78502	4.07264	1.99389	1.51081
Cyth4	310.869	-0.905195	0.000511334	0.00331544	11.6665	5.94944	10.0494	13.2837	5.82847	6.0704
Dlg4	541.828	-0.905135	6.10275e-06	6.9451e-05	7.74612	3.95261	7.1605	8.33174	4.09304	3.81218
Jazf1	506.757	-0.905086	6.74494e-06	7.54684e-05	16.772	8.55522	17.6645	15.8795	8.87742	8.23301
Pgap6	393.127	-0.904603	6.0434e-05	0.000516627	10.2265	5.22242	9.61734	10.8357	5.60056	4.84427
mt-Rnr2	24756.7	-0.904254	2.28181e-11	7.75932e-10	1707.14	874.293	1770.52	1643.76	1032.09	716.5
Abtb1	3412.5	-0.904009	3.2174e-15	2.0007e-13	162.523	83.0022	160.674	164.372	86.9416	79.0629
Stard8	384.554	-0.903174	5.21082e-05	0.000454404	6.70269	3.42166	6.67086	6.73453	3.35983	3.48349
Myo15	237.998	-0.90307	0.00112616	0.00651763	2.02803	1.03698	1.98141	2.07465	1.1434	0.930559
Lztr1	2667.37	-0.901931	5.40784e-13	2.4367e-11	57.4739	29.3604	55.3857	59.5621	28.7482	29.9726
4831440E17Rik	169.366	-0.901557	0.00694924	0.0297264	3.9502	2.02011	4.57113	3.32927	2.16485	1.87537
Ep300	361.514	-0.90129	0.000280765	0.00197964	4.48826	2.30081	4.53204	4.44449	2.74121	1.86042
Gaa	8749.12	-0.90109	2.65207e-16	1.89064e-14	267.718	137.066	252.756	282.68	144.937	129.196
Zfp41	447.588	-0.900864	0.000344983	0.00235426	7.66158	3.91652	6.0623	9.26086	3.65219	4.18086
Pafah1b3	2983.64	-0.900411	1.5327e-13	7.46199e-12	255.143	130.557	242.343	267.943	131.9	129.215
Peli2	1212.26	-0.899368	2.82085e-08	5.52571e-07	18.9594	9.72333	20.1414	17.7775	10.9148	8.5319
Scrn2	432.447	-0.899233	5.90811e-05	0.000506797	27.2682	13.9896	26.0669	28.4695	15.904	12.0752
Flywch1	2045.46	-0.898966	3.13333e-12	1.25339e-10	25.2106	12.9058	24.9186	25.5025	12.6995	13.112
Efl1	1070.47	-0.898907	1.71323e-08	3.51741e-07	31.8962	16.3488	29.6902	34.1021	17.0866	15.611
Fmo5	741.929	-0.898547	6.21276e-07	9.01256e-06	9.85112	5.04615	9.12525	10.577	4.98052	5.11178
Fbxo6	881.478	-0.898035	1.09686e-06	1.49757e-05	22.2778	11.3943	21.3444	23.2112	10.0552	12.7333
Jam3	1162.97	-0.896946	2.4164e-07	3.85352e-06	22.137	11.3813	19.9804	24.2937	12.8987	9.86396
Rras	212.873	-0.89653	0.0020866	0.0109521	17.264	8.86556	18.0049	16.5231	9.75646	7.97466
Polr1e	717.5	-0.894543	2.84772e-07	4.44436e-06	21.1538	10.8727	21.0718	21.2359	11.3645	10.3809
Fyn	912.517	-0.894369	4.08116e-08	7.74374e-07	13.9237	7.16093	13.8408	14.0066	7.7067	6.61515
Hipk2	207.384	-0.893703	0.00331011	0.0159983	1.45912	0.75098	1.26859	1.64965	0.809117	0.692843
Tnrc6b	3384.12	-0.893044	5.36126e-15	3.20407e-13	21.001	10.8061	20.8319	21.1702	11.2617	10.3505
Tgfbr3	996.774	-0.892182	2.48664e-06	3.10612e-05	17.8141	9.18207	20.349	15.2791	10.4504	7.91377
Nanos1	361.027	-0.891848	0.000118888	0.000943587	9.99169	5.13899	9.87204	10.1113	4.89536	5.38263
Arhgef40	268.416	-0.891295	0.00176753	0.00953045	3.40886	1.75286	2.9392	3.87853	1.55186	1.95385
Cntn6	511.767	-0.890817	2.17018e-05	0.000211209	12.8725	6.64243	12.3466	13.3984	7.5184	5.76646
Lrp1	882.678	-0.890249	8.21076e-08	1.4504e-06	6.44136	3.31958	6.09393	6.7888	3.35948	3.27969
Trib3	422.462	-0.889982	0.000193892	0.00144468	22.4081	11.5667	25.3046	19.5116	13.2749	9.85845
Apba2	720.809	-0.889758	1.2208e-06	1.65434e-05	18.511	9.55708	18.0254	18.9966	10.6732	8.44098
Gm10439	1012.9	-0.889585	1.67688e-07	2.76401e-06	61.0399	31.41	61.2095	60.8704	28.4085	34.4115
Mat2b	8286.91	-0.889073	1.78267e-17	1.54043e-15	398.896	205.683	417.449	380.342	209.62	201.746
Gm9881	156.992	-0.889066	0.0107934	0.0427727	3.58452	1.85268	3.85319	3.31584	2.23247	1.4729
Stk36	559.902	-0.888809	3.6685e-06	4.38747e-05	11.4836	5.92427	11.9089	11.0583	6.13362	5.71492
Per1	1415.76	-0.888697	9.37157e-08	1.63091e-06	17.9473	9.28077	16.198	19.6965	10.5139	8.04767
Tsr3	1436.73	-0.888627	1.23877e-09	3.13795e-08	121.294	62.4982	124.874	117.714	59.4992	65.4972
Kdm2b	7055.79	-0.888389	1.73664e-16	1.27442e-14	115.157	59.4436	109.795	120.518	61.3075	57.5798
Fcho1	700.61	-0.888381	4.87989e-07	7.24219e-06	19.9582	10.3025	19.4837	20.4327	10.7526	9.85245
Bcl9l	320.142	-0.888262	0.00326197	0.0158001	4.18617	2.16712	3.05433	5.31802	2.51061	1.82364
Fam89b	1962.68	-0.887787	2.58654e-11	8.70657e-10	175.9	90.7079	175.909	175.891	87.2601	94.1556
Trappc6a	434.943	-0.887571	2.98021e-05	0.000278501	56.7815	29.298	57.4175	56.1455	28.634	29.962
Sdr42e1	226.962	-0.887518	0.00152331	0.00843464	7.98749	4.12191	7.93112	8.04386	4.02536	4.21846
Shoc1	222.244	-0.887066	0.00206322	0.0108694	3.75291	1.93653	4.07971	3.4261	1.87812	1.99495
Nub1	4519.94	-0.886125	7.70417e-16	5.1605e-14	149.744	77.3483	153.335	146.153	77.2971	77.3995
Kat6a	941.076	-0.886085	9.25765e-08	1.6139e-06	10.948	5.65591	10.2551	11.6409	5.55311	5.75871
Coro1b	4191.51	-0.884347	7.96558e-15	4.6765e-13	121.337	62.7534	117.671	125.003	62.1165	63.3904
Peg3	948.21	-0.883916	1.41375e-06	1.88132e-05	8.95376	4.6455	9.41067	8.49685	5.44537	3.84563
Ahdc1	512.199	-0.883704	0.00115136	0.00664421	7.14967	3.7113	5.01156	9.28778	4.12986	3.29274
Idh1	2935.61	-0.883688	4.12326e-11	1.34925e-09	130.732	67.7606	140.578	120.886	74.4746	61.0466
mt-Rnr1	3101.52	-0.882609	1.8806e-10	5.49614e-09	352.46	183.03	361.89	343.029	209.636	156.425
Ankzf1	456.097	-0.881928	4.97068e-05	0.000436494	14.1789	7.34949	12.7871	15.5707	7.36678	7.33219
Gm5819	199.487	-0.881864	0.00365741	0.0174154	6.85905	3.55899	7.33242	6.38567	3.98873	3.12925
Irf2bp2	268.442	-0.87913	0.000699492	0.00432411	5.72962	2.97598	5.90641	5.55283	3.09853	2.85342
Aco1	1861.69	-0.878494	6.33982e-11	1.99658e-09	46.717	24.2909	44.7721	48.662	25.7084	22.8734
Pcm1	10796.4	-0.878463	6.22774e-18	5.75518e-16	87.5519	45.5129	90.2986	84.8051	47.9011	43.1248
Lcp1	295.944	-0.878325	0.00182737	0.00980539	6.50436	3.37559	7.90244	5.10628	3.3275	3.42369
Pepd	1941.43	-0.877589	9.0859e-11	2.79021e-09	113.563	59.1088	115.774	111.352	64.605	53.6126
Smarca4	9825.21	-0.876742	3.4647e-17	2.83438e-15	120.008	62.4666	115.457	124.559	65.2831	59.65
Slc38a4	621.12	-0.876681	3.79537e-05	0.000344605	15.5443	8.11067	15.3877	15.701	9.78337	6.43797
Med18	635.077	-0.875421	3.54012e-05	0.000323406	40.9864	21.3417	34.1571	47.8157	21.1568	21.5265
Xpa	290.206	-0.874312	0.000911399	0.0054322	26.4461	13.8027	27.8392	25.053	15.9577	11.6477
Zfp260	1438.65	-0.873705	3.6841e-08	7.05066e-07	40.4276	21.1135	36.9754	43.8797	23.4356	18.7914
Pfkm	733.591	-0.872879	4.99667e-07	7.38804e-06	22.0434	11.5009	21.4492	22.6377	11.9288	11.0731
Spata17	160.469	-0.872638	0.00992058	0.0398841	2.46501	1.28798	2.20766	2.72235	1.44906	1.1269
Akap17b	941.486	-0.871827	3.76445e-07	5.72293e-06	16.2672	8.48349	15.0387	17.4958	8.07346	8.89351
Shoc2	4869.65	-0.871818	2.38505e-11	8.04189e-10	117.473	61.1617	121.592	113.353	55.4961	66.8272
Unc119	228.798	-0.8717	0.00225668	0.0116911	16.1803	8.44913	17.7682	14.5924	9.05857	7.83968
Tecr	6585.32	-0.871436	3.44176e-17	2.8272e-15	606.944	316.777	609.676	604.213	318.666	314.888
Bpnt1	635.279	-0.871396	9.17776e-06	9.86523e-05	13.6824	7.15622	12.7515	14.6132	8.02742	6.28502
Hfm1	167.087	-0.870901	0.00813338	0.0337948	2.59965	1.35982	2.69117	2.50813	1.56521	1.15442
Tec	375.602	-0.868364	0.000347201	0.00236778	13.3957	7.02393	12.3274	14.4639	8.10991	5.93794
Iqcg	615.801	-0.868061	4.44576e-06	5.22933e-05	11.8971	6.22014	12.4625	11.3317	6.00574	6.43454
Sesn2	2919.52	-0.867846	8.57077e-13	3.71109e-11	118.738	62.1995	115.02	122.456	65.9736	58.4254
Phf1	888.531	-0.867043	1.04592e-05	0.000110933	39.2353	20.6004	33.7123	44.7583	23.505	17.6958
Zfp948	1089.79	-0.86676	3.35574e-06	4.06209e-05	25.2771	13.2728	27.8569	22.6974	15.6556	10.89
Grsf1	3263.74	-0.866527	1.07473e-13	5.32323e-12	124.263	65.0991	129.187	119.338	67.0422	63.1559
Rasl11a	1154.21	-0.863571	7.40553e-07	1.05013e-05	110.649	57.9447	106.261	115.038	50.7028	65.1867
Ift122	3455.21	-0.863464	1.37842e-09	3.44796e-08	84.9021	44.4804	78.5375	91.2667	40.2856	48.6752
Clstn2	155.074	-0.862618	0.0103586	0.0413952	1.24703	0.654363	1.3343	1.15977	0.62105	0.687676
Pisd-ps1	524.133	-0.862292	3.54288e-05	0.000323511	19.6767	10.3558	18.4816	20.8718	11.6266	9.08506
B2m	752.349	-0.86228	4.28709e-05	0.000384605	94.7466	49.9134	105.942	83.5511	59.7967	40.03
Ptov1	181.812	-0.861841	0.00576231	0.0253854	7.50284	3.93909	7.55537	7.45031	3.67667	4.20151
Trim21	489.813	-0.861255	0.000267893	0.00190707	18.9638	10.0015	20.2139	17.7136	12.2594	7.74358
D630045J12Rik	1175.1	-0.860937	1.02914e-08	2.18075e-07	11.4263	6.01417	11.2574	11.5951	6.43878	5.58955
Txnrd3	3640.74	-0.860698	5.75447e-13	2.57545e-11	138.53	72.9482	133.405	143.654	78.2136	67.6829
Npdc1	429.653	-0.860374	0.000137459	0.00107558	17.2533	9.09066	15.6661	18.8406	10.0378	8.1435
Zfp747	155.239	-0.860235	0.00981584	0.0395278	6.2427	3.28744	6.20752	6.27787	3.58215	2.99273
Nsmce4a	671.41	-0.860162	2.97866e-06	3.66114e-05	50.4882	26.541	53.2745	47.7019	25.6734	27.4087
Arid4a	421.405	-0.859789	5.70882e-05	0.000492028	5.19308	2.73347	5.13649	5.24967	2.79888	2.66805
Fsd1l	895.454	-0.859341	8.57444e-06	9.29682e-05	7.6505	4.01978	6.84162	8.45938	3.54685	4.49271
Gm9595	380.838	-0.857879	0.000597192	0.00379032	13.4424	7.0689	15.439	11.4458	6.40357	7.73423
Tnpo2	1886.96	-0.856223	7.21122e-08	1.29796e-06	30.2348	15.9239	27.322	33.1475	14.4506	17.3972
Kif5a	1660.99	-0.855561	7.1368e-08	1.28572e-06	21.4096	11.3257	22.8671	19.952	13.028	9.62341
Relb	547.222	-0.855045	2.50638e-05	0.000240182	20.0329	10.586	18.161	21.9047	11.1017	10.0704
Zfp677	558.834	-0.854877	7.29403e-05	0.000611071	20.3751	10.7716	23.1781	17.5722	12.0234	9.51989
Casp9	2777.71	-0.854848	7.69414e-13	3.36067e-11	76.7653	40.5515	74.8935	78.6371	41.7236	39.3794
Setx	4645.09	-0.854451	1.62945e-11	5.70621e-10	43.6592	23.1144	44.2096	43.1088	26.098	20.1307
Chd6	2643.75	-0.853757	1.25847e-09	3.17979e-08	24.196	12.8183	23.0602	25.3318	14.5144	11.1223
Ggt7	943.176	-0.853667	2.83994e-07	4.43569e-06	36.1407	19.0769	36.6639	35.6175	17.8885	20.2654
Kif27	935.229	-0.853537	0.000115896	0.000921673	11.8439	6.29333	11.7902	11.8977	8.13846	4.4482
Atp8b5	217.662	-0.853257	0.00316302	0.0154105	4.72831	2.50019	4.34267	5.11396	2.52317	2.47721
Heg1	1943.13	-0.852827	6.31452e-08	1.15425e-06	22.0961	11.7008	24.8667	19.3254	13.0077	10.3939
Maml3	450.128	-0.852205	0.000262361	0.00187169	6.81434	3.61529	6.9392	6.68948	4.35102	2.87955
Ppp2r5b	646.909	-0.851757	3.8877e-05	0.000351938	11.7623	6.24103	10.5938	12.9308	7.21245	5.26961
Kdm6b	1575.58	-0.851314	8.51334e-09	1.83912e-07	16.9082	8.94636	15.6352	18.1812	8.69588	9.19683
Spata13	1261.64	-0.850711	5.52023e-06	6.36565e-05	9.63194	5.10525	7.775	11.4889	5.21735	4.99315
Wwp1	1942.31	-0.846846	2.75855e-09	6.50867e-08	28.8154	15.2746	29.6858	27.945	14.1317	16.4174
Elk1	916.499	-0.846512	7.69998e-07	1.08698e-05	27.7711	14.7619	25.2456	30.2967	15.4197	14.1041
Foxo1	1473.5	-0.845897	1.0008e-09	2.58101e-08	28.5374	15.1722	28.2297	28.8451	15.8766	14.4677
Gstp2	229.076	-0.845273	0.00425038	0.0197582	16.3857	8.732	16.6167	16.1548	10.4658	6.99822
Ccdc191	1926.85	-0.845079	1.56302e-09	3.87091e-08	27.478	14.6297	28.7514	26.2046	16.1345	13.1249
Ncor2	1974.45	-0.844637	2.04545e-06	2.60889e-05	11.1672	5.9548	9.09434	13.24	6.62555	5.28404
Fgd1	315.975	-0.844557	0.000765622	0.00467072	8.0345	4.27669	7.20465	8.86434	4.48976	4.06363
Atg9a	730.306	-0.844229	3.14247e-06	3.82714e-05	17.8471	9.50056	16.4309	19.2632	9.88808	9.11305
Nsmf	1792.27	-0.841532	2.98658e-08	5.82747e-07	65.2215	34.8334	59.6815	70.7615	38.6929	30.9739
Selenop	329.675	-0.840176	0.00338772	0.0163142	15.9738	8.55939	16.6521	15.2954	11.1246	5.9942
Trip10	1537.25	-0.838847	3.09872e-08	6.02274e-07	59.4711	31.8221	58.7644	60.1778	35.9959	27.6483
Bin2	3112.25	-0.838749	1.0159e-12	4.3516e-11	143.79	76.8321	139.921	147.66	80.1759	73.4883
Matk	271.052	-0.838592	0.00221269	0.011496	10.0022	5.3307	10.0679	9.93648	4.59518	6.06623
Dyrk1b	885.072	-0.838454	1.04937e-05	0.000111181	6.96797	3.72949	6.02623	7.90971	4.13932	3.31967
Sqle	6461.14	-0.838329	2.11635e-13	1.01306e-11	252.412	134.751	271.438	233.386	135.212	134.291
Bahcc1	1120.73	-0.838136	3.45858e-06	4.17645e-05	10.1772	5.44956	8.82982	11.5247	6.09285	4.80627
Aff3	1286.11	-0.837774	9.58183e-08	1.65883e-06	13.3315	7.13759	13.42	13.2429	8.06058	6.2146
Ubxn10	1262.46	-0.837533	8.74921e-09	1.88396e-07	29.6042	15.8332	29.2082	30.0001	16.7156	14.9507
Rusc2	620.427	-0.837355	0.001011	0.00593894	5.11301	2.74372	3.79656	6.42945	3.2307	2.25673
Oasl1	250.977	-0.836884	0.00274376	0.0137367	11.7127	6.26836	10.2337	13.1917	6.59049	5.94624
Ttll4	2273.5	-0.836805	8.46663e-11	2.61614e-09	29.2426	15.6426	27.662	30.8232	16.0393	15.2458
Slc10a7	1177.67	-0.834203	9.52265e-08	1.65001e-06	21.426	11.4658	20.736	22.1159	10.8323	12.0993
Sult5a1	547.143	-0.833634	2.74175e-05	0.000259744	36.4393	19.5211	39.379	33.4996	19.6591	19.383
Crip2	1432.68	-0.833078	1.56485e-05	0.000158558	30.9372	16.6303	36.1038	25.7706	19.7125	13.548
Pik3r3	10752.8	-0.831901	4.66946e-14	2.40845e-12	201.797	108.403	212.476	191.118	117.219	99.5861
Hexim2	1001.85	-0.831676	1.07854e-07	1.84796e-06	9.19903	4.9352	9.01058	9.38747	4.90069	4.96971
Mast3	1156	-0.830834	1.66214e-06	2.1756e-05	9.31926	5.01067	8.06482	10.5737	5.33616	4.68519
Hdac11	621.551	-0.830724	6.30874e-06	7.14286e-05	24.0473	12.9122	24.8134	23.2811	13.1206	12.7038
Gm40003	1196.35	-0.830195	9.11423e-08	1.59168e-06	319.611	171.567	344.523	294.699	169.531	173.603
Trabd	596.68	-0.829471	0.000125274	0.000989068	21.5353	11.5811	17.8274	25.2432	11.7654	11.3969
Suox	448.437	-0.829421	0.000140517	0.00109693	20.4347	10.9856	18.4852	22.3842	11.0837	10.8875
Klf11	5818.26	-0.829293	2.92207e-12	1.17123e-10	156.518	84.1113	170.659	142.378	85.9813	82.2414
Sox11	373.594	-0.828292	0.000818594	0.00495902	4.73189	2.53908	5.14679	4.31698	2.20487	2.87328
Evi5	633.762	-0.828285	9.10526e-06	9.80842e-05	3.60287	1.93895	3.8156	3.39015	2.05957	1.81832
Ttc38	729.199	-0.826	0.000271825	0.00193017	19.7152	10.6723	19.366	20.0643	13.6255	7.71921
Zmynd8	2910.33	-0.825766	1.09077e-10	3.31399e-09	25.7041	13.8689	26.837	24.5712	15.1883	12.5496
Arid1a	3215.15	-0.825616	2.13883e-11	7.323e-10	36.683	19.7948	35.2173	38.1487	21.3526	18.237
Akap13	3178.13	-0.825477	1.01885e-09	2.62078e-08	15.0653	8.138	14.2601	15.8705	9.12825	7.14774
Srebf2	10044.7	-0.825257	0.0083046	0.0343774	191.147	103.36	154.819	227.475	115.773	90.9466
Lactb2	229.433	-0.825107	0.00753093	0.031761	12.485	6.7436	14.497	10.473	7.99823	5.48897
Elmo3	219.296	-0.824844	0.00386769	0.0182556	7.15052	3.85927	7.01037	7.29067	4.20103	3.5175
Zscan5b	237.782	-0.824771	0.0046364	0.0211924	12.8241	6.93239	12.1506	13.4975	8.23393	5.63085
Rsl1	207.316	-0.82439	0.00860332	0.0353647	10.8391	5.86228	9.69258	11.9856	6.98636	4.73821
Rfx5	699.203	-0.824102	1.14001e-05	0.000119845	8.29962	4.47377	9.1538	7.44544	4.40903	4.53851
Cfap20dc	1855.9	-0.824066	3.46312e-06	4.17941e-05	46.4441	25.1435	50.7911	42.097	30.444	19.843
Cdc42ep4	1438.55	-0.82386	2.14029e-05	0.000209047	35.8861	19.4237	28.8759	42.8964	22.1449	16.7025
Polr3gl	1528.15	-0.823814	3.2675e-08	6.31389e-07	93.8488	50.6608	102.414	85.2836	53.7269	47.5947
Ranbp17	1753.22	-0.822493	7.33041e-10	1.95357e-08	5.55028	2.99984	5.60789	5.49266	3.19203	2.80766
Lrrc9	318.027	-0.821897	0.00244981	0.0124906	2.7664	1.49022	2.68394	2.84887	1.20578	1.77466
Mettl27	352.731	-0.821711	0.000381843	0.00257499	12.0536	6.51298	11.6464	12.4609	6.53026	6.49569
Rundc3b	386.04	-0.821143	0.000258268	0.00184645	10.4351	5.64659	10.2546	10.6156	6.13276	5.16043
Slc4a5	1701.16	-0.8211	4.98582e-09	1.11948e-07	29.4257	15.9207	31.075	27.7763	17.1407	14.7007
Gm46899	184.972	-0.820979	0.00980108	0.0394912	1.42481	0.769471	1.29765	1.55198	0.699723	0.839218
Calcoco1	3546.4	-0.820525	1.02915e-09	2.64049e-08	134.116	72.5025	120.345	147.887	70.9535	74.0515
Sgms2	672.777	-0.820364	4.09119e-06	4.84367e-05	5.33021	2.884	5.37864	5.28179	3.0092	2.7588
Enpp5	1581.37	-0.820274	1.39006e-07	2.32971e-06	34.719	18.8014	38.246	31.192	20.7074	16.8954
Gm20337	327.413	-0.820129	0.00261645	0.0131786	30.6634	16.6225	35.4404	25.8865	19.7436	13.5015
Rnf157	449.46	-0.820007	9.36006e-05	0.000761974	9.50085	5.14391	9.5524	9.44929	5.52078	4.76705
Zhx3	208.99	-0.818471	0.00488805	0.0221017	4.98056	2.69749	4.73922	5.2219	2.71585	2.67914
Acrbp	820.066	-0.818027	1.06945e-06	1.46214e-05	40.6619	22.0419	41.6521	39.6716	23.4238	20.6601
Pi4ka	1657.53	-0.816812	3.79605e-08	7.23075e-07	23.1851	12.5967	23.0832	23.2871	14.2345	10.9588
Ppp1r13b	631.723	-0.816704	8.06479e-06	8.83056e-05	14.206	7.70729	14.0236	14.3884	8.10152	7.31306
Cxadr	953.027	-0.816649	5.11429e-07	7.5396e-06	9.9978	5.41744	10.5337	9.46192	5.30938	5.52549
Urb2	1473.72	-0.814136	9.45749e-08	1.643e-06	25.7799	14.0299	24.3723	27.1876	15.5992	12.4607
Tuba1a	470.958	-0.813966	0.000703257	0.00434146	31.605	17.2179	34.984	28.2261	20.8565	13.5793
Alas1	3093.85	-0.813609	3.74338e-10	1.0436e-08	101.237	54.9231	99.5768	102.897	51.1182	58.728
Poll	592.177	-0.813496	3.18225e-05	0.0002961	23.5882	12.8385	22.711	24.4655	14.2654	11.4116
Klf4	534.211	-0.813452	0.000493243	0.00321752	18.7354	10.1833	22.6685	14.8023	10.8731	9.49358
Hivep2	864.475	-0.813392	1.58806e-06	2.0896e-05	3.66378	1.99197	3.40784	3.91973	2.04264	1.9413
Sesn1	1653.18	-0.813307	1.38483e-09	3.45533e-08	52.801	28.6889	52.5476	53.0544	28.5652	28.8125
Gramd1c	364.151	-0.813059	0.0023233	0.0119524	7.63897	4.14466	9.30392	5.97401	3.8971	4.39222
Katnb1	1350.46	-0.812124	1.01713e-06	1.39539e-05	38.2925	20.8254	33.3491	43.2358	20.3993	21.2515
Hdgfl2	849.03	-0.811458	8.42893e-06	9.16893e-05	21.9131	11.9177	19.6268	24.1994	11.3775	12.4579
Xpo6	432.425	-0.811098	0.000281368	0.00198265	8.61285	4.68657	9.62479	7.60091	4.7516	4.62154
Ropn1l	411.182	-0.811049	0.00179241	0.00964377	48.1548	26.3062	40.1821	56.1274	31.5091	21.1034
Phkg2	667.294	-0.811017	5.58316e-06	6.43079e-05	37.6782	20.5157	38.4225	36.9338	21.2259	19.8054
Plin2	856.834	-0.81094	7.33457e-07	1.04277e-05	35.667	19.4219	36.6159	34.718	20.1331	18.7106
Strn4	795.392	-0.810233	0.000168861	0.00128748	16.238	8.87864	17.4142	15.0617	11.059	6.69833
Cep126	210.317	-0.810008	0.0065098	0.0281138	1.68474	0.919441	1.63419	1.73529	1.05492	0.783964
Stxbp2	1328.48	-0.809229	6.16362e-07	8.94779e-06	36.3408	19.8554	36.5957	36.0858	22.9089	16.8019
Hdc	253.975	-0.809174	0.00344	0.0165181	10.2046	5.55427	9.76458	10.6447	4.97661	6.13193
Ubald2	2012.48	-0.808456	4.494e-10	1.23731e-08	144.636	78.9131	139.284	149.988	81.6966	76.1296
Zfp775	287.732	-0.808308	0.00493718	0.0222947	12.1624	6.65578	10.4146	13.9102	8.0357	5.27585
Pex6	392.974	-0.807689	0.00027513	0.00194609	12.4153	6.77607	13.0521	11.7786	7.09033	6.46182
Heatr5a	1257.54	-0.80745	2.68506e-05	0.000254857	16.3238	8.88268	14.3971	18.2504	7.48298	10.2824
Nradd	924.852	-0.807002	4.08885e-05	0.000368643	84.6393	46.3729	84.2981	84.9805	56.5764	36.1695
Zfp975	342.34	-0.806412	0.000681526	0.00423226	11.2527	6.14446	12.1276	10.3779	6.27625	6.01268
Cntrl	1816.76	-0.806361	1.17847e-08	2.48137e-07	13.419	7.34141	13.2295	13.6085	8.15663	6.52619
Dusp28	173.78	-0.806228	0.0121943	0.0474116	12.4052	6.76593	12.9544	11.856	6.16302	7.36885
Max	1003.87	-0.805918	2.26255e-07	3.64215e-06	40.7745	22.2881	40.2499	41.2991	23.4054	21.1708
Grhl3	910.195	-0.805734	1.28495e-05	0.000133103	34.7181	19.02	35.4084	34.0278	22.3985	15.6414
Zfp52	354.887	-0.805517	0.000952701	0.00563796	8.61683	4.7041	7.84161	9.39205	4.35033	5.05788
Dera	1011.19	-0.804823	2.74306e-07	4.29445e-06	63.7519	34.8342	65.2049	62.299	34.2251	35.4432
Ankrd40	362.845	-0.804654	0.000547426	0.00351243	10.2583	5.61016	9.48208	11.0345	5.67528	5.54504
P2rx3	310.882	-0.804119	0.000982997	0.00579251	4.6304	2.53409	4.77651	4.48428	2.69087	2.37731
Trmt1	3546.98	-0.804018	1.92546e-12	7.87586e-11	80.4455	44.0078	78.3887	82.5024	44.6369	43.3787
Gm45871	412.65	-0.803815	0.000236778	0.00171218	13.6237	7.44776	13.6597	13.5876	7.12994	7.76558
Pip4p2	325.554	-0.803152	0.00104403	0.00611681	15.1837	8.31158	13.8712	16.4961	8.3218	8.30136
Nipsnap2	1275.06	-0.803099	2.50651e-08	4.99326e-07	59.2282	32.4102	59.3955	59.061	32.3245	32.496
Ocln	5477	-0.803056	9.09986e-11	2.79021e-09	131.419	71.7912	131.245	131.592	66.0633	77.5192
Rusc1	258.403	-0.802649	0.00338991	0.0163169	6.45652	3.5364	5.70018	7.21285	3.57932	3.49347
Nrros	328.471	-0.802309	0.00112576	0.00651722	5.34466	2.9258	4.88616	5.80316	2.81312	3.03848
Mlst8	874.456	-0.801867	5.46431e-06	6.3048e-05	27.2755	14.9471	24.4223	30.1286	15.1294	14.7648
Lck	225.334	-0.800117	0.00547192	0.0243534	4.92847	2.70728	5.13911	4.71783	3.07933	2.33524
Hspbap1	5010.14	-0.800105	6.06819e-14	3.08998e-12	71.8904	39.4434	71.4423	72.3385	40.6124	38.2745
Ntpcr	339.251	-0.799891	0.000717209	0.00442131	11.6241	6.38105	11.0748	12.1733	6.72004	6.04205
Acadm	2675.21	-0.797964	1.2201e-09	3.09458e-08	137.89	75.7866	149.23	126.55	80.3799	71.1933
Fnbp1l	4401.91	-0.797687	8.422e-11	2.60638e-09	86.9553	47.6991	85.6219	88.2886	44.6069	50.7912
Zfp292	3571.13	-0.797581	1.71822e-08	3.51769e-07	37.9098	20.8707	41.5068	34.3128	23.5655	18.1759
Gas2l1	668.06	-0.796941	4.51704e-05	0.000401982	13.0743	7.1797	11.9335	14.2151	6.68248	7.67692
Ssh3	563.228	-0.796869	5.31085e-05	0.000461716	21.3659	11.7593	22.1874	20.5445	12.9707	10.5479
Hs3st3b1	887.386	-0.796634	9.14007e-06	9.8353e-05	15.6322	8.59871	13.7509	17.5136	8.73995	8.45747
Oscp1	601.729	-0.79657	2.65125e-05	0.000252425	7.63472	4.20227	7.39766	7.87179	4.5332	3.87133
Iffo1	325.16	-0.796445	0.00144703	0.00805918	7.48846	4.12541	7.00128	7.97565	4.66744	3.58339
Unc13b	890.734	-0.795682	1.43617e-05	0.000146786	4.81492	2.65404	5.22481	4.40503	3.03454	2.27354
Usp11	2697.68	-0.795398	3.42808e-11	1.13479e-09	77.6964	42.7642	75.7013	79.6915	43.673	41.8554
Kif13b	1060.86	-0.792558	1.68439e-06	2.19896e-05	10.8075	5.96931	10.1301	11.4849	6.60148	5.33715
Pdpn	483.319	-0.792314	0.000196302	0.00145991	13.9449	7.68475	15.3937	12.4961	7.58769	7.78181
Tmem263	349.229	-0.791462	0.00159174	0.00874801	9.79682	5.39957	8.72244	10.8712	4.90955	5.8896
Naglu	269.753	-0.791281	0.0114041	0.0447664	11.5266	6.39007	9.44535	13.6079	8.05589	4.72424
Gstm5	4276.16	-0.789637	4.23335e-12	1.66016e-10	497.75	275.118	522.037	473.463	287.847	262.388
Hexa	2562.49	-0.789082	9.29965e-11	2.84709e-09	130.296	72.0632	132.769	127.824	76.0654	68.061
Srd5a1	364.11	-0.788633	0.00152019	0.00842435	12.7003	7.03796	13.5273	11.8733	8.33772	5.7382
Ube4b	14416.8	-0.787699	5.09055e-15	3.06062e-13	113.22	62.6997	110.708	115.733	66.3228	59.0766
Dync2h1	1614.1	-0.787279	4.64806e-07	6.92904e-06	10.9912	6.09814	10.579	11.4035	6.99874	5.19753
Sem1	3214.56	-0.787078	2.37272e-10	6.81833e-09	693.478	383.454	668.896	718.059	367.888	399.02
Ccdc130	1285.33	-0.786315	9.0326e-08	1.57898e-06	44.6325	24.6978	44.3536	44.9114	23.9072	25.4884
Hivep1	219.657	-0.786019	0.00548871	0.0244009	2.06055	1.14201	2.06286	2.05824	1.21301	1.07101
Borcs8	447.453	-0.784609	0.000250913	0.00179708	17.0246	9.44206	18.3509	15.6983	9.96313	8.921
Igbp1	376.298	-0.784209	0.000542284	0.00348392	26.2521	14.5612	27.8761	24.6281	15.1335	13.989
Lats2	2714.01	-0.784156	9.17718e-08	1.60127e-06	50.9477	28.2925	56.986	44.9094	31.2412	25.3438
Ncoa2	1516.5	-0.783518	1.08334e-07	1.8546e-06	6.17918	3.43157	5.69401	6.66435	3.60686	3.25627
Rbm48	2434.8	-0.783181	3.14412e-08	6.10504e-07	54.389	30.1258	58.4605	50.3175	28.0082	32.2435
Sestd1	1139.58	-0.78221	3.09591e-06	3.77735e-05	12.8889	7.14269	13.4834	12.2945	6.43927	7.8461
Myo1c	2451.39	-0.782159	7.13289e-09	1.56118e-07	43.8983	24.4171	40.9035	46.893	26.4555	22.3786
Rccd1	302.89	-0.779924	0.00152409	0.00843662	7.24652	4.03205	7.02186	7.47117	4.15795	3.90616
Akr1e1	1114.95	-0.779778	7.29954e-07	1.03853e-05	37.5773	20.8833	39.8207	35.3339	20.2	21.5666
Mgrn1	2711.81	-0.779554	2.83926e-09	6.67544e-08	54.4619	30.3321	50.2492	58.6745	31.9873	28.6769
Tmem67	601.113	-0.778896	3.31971e-05	0.0003063	14.6153	8.13311	15.307	13.9236	8.17776	8.08846
Zfp248	859.885	-0.778139	9.04847e-06	9.75252e-05	23.0552	12.8445	20.82	25.2904	13.0616	12.6274
Resf1	4277.64	-0.777925	9.572e-11	2.92151e-09	36.2972	20.2128	39.23	33.3644	20.6206	19.8051
Kmt2c	2512.03	-0.77611	2.12845e-07	3.44574e-06	15.4995	8.66716	16.3323	14.6668	10.0581	7.27624
Chd4	18708	-0.775945	8.04234e-14	4.05387e-12	290.338	162.084	274.781	305.896	169.655	154.512
Zkscan14	968.723	-0.775769	5.94833e-06	6.79649e-05	45.7314	25.4707	49.2134	42.2495	23.8372	27.1041
Dedd	936.24	-0.774662	1.35104e-06	1.80751e-05	12.2903	6.85812	12.1433	12.4373	6.73775	6.9785
Manba	290.214	-0.773796	0.00431554	0.0200006	7.8713	4.40799	8.19335	7.54926	5.28499	3.531
Pkp2	1055.68	-0.773054	6.88535e-06	7.69532e-05	38.5706	21.5967	41.2084	35.9329	24.5746	18.6188
Zfp512b	1241.15	-0.772302	9.8165e-06	0.000104841	21.6794	12.1081	25.0696	18.2892	11.8774	12.3388
Wdr89	1170.42	-0.772137	7.52579e-06	8.31335e-05	41.4155	23.1245	37.7633	45.0678	21.007	25.2421
Mrm2	274.676	-0.771987	0.0047112	0.0214802	20.0748	11.2226	17.4213	22.7283	10.6723	11.7729
Trap1	6361.15	-0.771867	3.54394e-12	1.40917e-10	256.003	143.066	249.589	262.417	138.626	147.505
Igf1r	9384.11	-0.771598	5.01828e-11	1.61304e-09	79.5124	44.4863	87.3946	71.6302	46.1952	42.7774
Katnal2	676.189	-0.771061	1.72885e-05	0.000173415	18.7615	10.4951	19.385	18.138	10.381	10.6093
Pxn	1921.32	-0.770912	9.33694e-06	0.000100309	35.1933	19.7652	30.2541	40.1325	22.9186	16.6119
Dnmt3a	5796.69	-0.770206	1.49146e-10	4.41053e-09	24.7902	13.9112	24.1962	25.3841	15.4632	12.3592
Gm31724	354.455	-0.768994	0.00214383	0.0112053	14.4848	8.10012	14.0067	14.9628	6.92812	9.27211
Fam160b1	405.633	-0.768258	0.000768046	0.00468264	7.06332	3.95604	7.74219	6.38445	3.76527	4.1468
Gbf1	3512.02	-0.766685	3.25802e-10	9.18549e-09	56.6532	31.7858	53.6883	59.6182	31.1184	32.4531
2610044O15Rik8	207.231	-0.765797	0.00946037	0.0382891	12.2942	6.91203	11.3737	13.2147	7.37777	6.44628
Mprip	3292.59	-0.765594	6.82719e-11	2.14273e-09	17.977	10.107	18.4208	17.5332	10.7336	9.48051
Pdp2	1942.5	-0.764751	3.5799e-07	5.47574e-06	35.6398	20.0092	39.9152	31.3644	19.5083	20.51
Mpg	1126.65	-0.76394	1.61032e-06	2.11193e-05	67.9753	38.2029	64.0044	71.9461	36.6178	39.7881
Aifm2	740.878	-0.763917	1.51139e-05	0.000153453	18.0954	10.1776	17.0494	19.1415	10.2038	10.1515
Gng12	3563.24	-0.762683	1.22615e-10	3.68048e-09	86.0091	48.4027	91.1926	80.8256	49.0651	47.7402
Mb21d2	1848.59	-0.762466	4.92734e-09	1.10885e-07	55.6146	31.3265	56.6179	54.6114	32.8181	29.8349
Acad11	1057.08	-0.760636	5.60928e-06	6.45714e-05	33.3194	18.7653	30.7522	35.8867	17.7205	19.8101
Arrdc4	2930.62	-0.760492	1.4217e-08	2.9747e-07	77.9804	44.0618	76.5731	79.3876	49.652	38.4717
Pygb	5689.02	-0.759142	1.65041e-08	3.40384e-07	155.846	88.0251	135.553	176.139	91.1803	84.87
Pctp	2150.37	-0.758507	1.80914e-09	4.4043e-08	79.527	44.8779	81.1867	77.8672	44.696	45.0599
Sult4a1	1465.06	-0.758398	4.76752e-08	8.87951e-07	61.333	34.6317	59.7811	62.8849	35.192	34.0714
Tnrc6a	2439.83	-0.757827	7.64428e-10	2.02639e-08	19.7152	11.1369	19.1102	20.3202	11.3253	10.9484
Hsf1	2529.13	-0.757611	7.44403e-09	1.62216e-07	101.24	57.1626	94.8606	107.62	55.891	58.4341
Acss1	1803.1	-0.757604	1.22867e-08	2.58436e-07	52.7497	29.7793	52.8397	52.6598	29.1425	30.4161
Sucla2	4985.52	-0.757233	1.87116e-10	5.47657e-09	218.48	123.383	236.399	200.561	124.01	122.757
Clcn6	916.487	-0.757016	6.63582e-05	0.000561261	9.2836	5.2613	8.32543	10.2418	6.08328	4.43933
Hmgcr	6390.43	-0.7562	3.72032e-12	1.47344e-10	138.814	78.4646	146.27	131.359	79.1948	77.7343
Hmg20a	2524.31	-0.756023	8.95426e-09	1.92001e-07	70.4111	39.759	71.5691	69.2532	37.3484	42.1697
Parp6	837.195	-0.755108	5.15461e-06	5.97857e-05	21.6603	12.2554	21.1669	22.1536	12.2566	12.2542
Gfm1	675.346	-0.754922	0.000300705	0.00209654	27.332	15.5159	28.4896	26.1743	18.7001	12.3316
Fbxo36	1066.24	-0.754759	2.4751e-06	3.09364e-05	62.9372	35.5784	65.1894	60.6849	33.6034	37.5534
Gm5091	226.701	-0.753975	0.00719737	0.0305739	20.2065	11.4531	20.6344	19.7785	12.4126	10.4935
Mindy4	312.645	-0.753846	0.00485847	0.0219859	6.81525	3.87007	5.96623	7.66428	4.50226	3.23788
Atat1	478.776	-0.753669	0.000203089	0.00150198	5.13827	2.91188	5.15875	5.11779	3.05082	2.77293
Inpp5f	7676.93	-0.753053	9.27141e-14	4.62666e-12	152.105	86.1941	152.658	151.551	87.6199	84.7684
AW209491	416.154	-0.752839	0.00352584	0.0168881	21.6079	12.2051	25.1447	18.0712	10.2622	14.148
Cars	3916.69	-0.751925	1.09408e-10	3.319e-09	127.544	72.3019	134.756	120.332	72.6313	71.9724
Art5	222.186	-0.75166	0.00879053	0.0360612	13.1337	7.45736	12.1208	14.1465	8.00057	6.91415
Slc9b2	195.073	-0.750738	0.0116448	0.0455768	3.56502	2.02416	3.56798	3.56206	2.1034	1.94492
Zyg11a	756.079	-0.75001	0.000821162	0.00497155	19.1928	10.8981	14.7442	23.6413	10.5067	11.2894
Hk2	1604.49	-0.749295	5.01824e-08	9.31806e-07	21.1227	12.01	21.7224	20.5229	12.7861	11.234
Acaa2	1647.57	-0.749198	1.45052e-05	0.000148026	115.269	65.7446	112.941	117.598	79.3549	52.1342
Gnai2	692.562	-0.74891	2.31069e-05	0.00022336	32.4522	18.4363	33.1894	31.715	18.3164	18.5562
Dip2a	438.264	-0.748666	0.00156674	0.00862487	7.04846	4.00955	5.84658	8.25034	4.12433	3.89477
Asxl1	2329.22	-0.747953	3.26011e-09	7.5845e-08	33.9507	19.3166	32.4701	35.4313	19.9495	18.6836
Crebl2	350.856	-0.747549	0.00394791	0.0185728	4.30491	2.45142	5.04916	3.56066	2.74464	2.15819
Syt11	1179	-0.747414	6.00003e-07	8.73571e-06	24.436	13.914	24.7194	24.1526	14.912	12.916
Smco2	258.952	-0.74735	0.00457159	0.0209345	10.694	6.08442	10.3076	11.0804	6.13248	6.03637
Slc38a2	2759.3	-0.746917	1.74278e-07	2.85847e-06	62.1463	35.4383	66.9474	57.3453	40.0943	30.7824
Clec10a	232.969	-0.746902	0.00723216	0.0307021	8.13557	4.6262	8.1776	8.09354	4.39307	4.85933
Zswim6	594.247	-0.746606	0.000300852	0.00209682	11.4383	6.51329	13.0375	9.8392	6.94594	6.08063
Jsrp1	422.293	-0.746472	0.000546004	0.00350669	27.7631	15.7986	29.2574	26.2689	15.7365	15.8606
Aldh2	1918.82	-0.746276	5.52381e-08	1.02093e-06	48.4138	27.6	45.8828	50.9448	29.7128	25.4872
Gpc4	2380.87	-0.746222	1.01058e-07	1.7435e-06	42.6215	24.2578	38.5985	46.6445	23.6909	24.8246
Znhit3	1049.35	-0.74539	1.22744e-05	0.000127875	100.335	57.0433	101.838	98.8322	51.159	62.9275
Arrdc1	588.7	-0.744632	9.76024e-05	0.000791646	25.7293	14.6558	27.0537	24.4049	14.3344	14.9772
Pgm1	5943.37	-0.744309	1.02527e-12	4.37296e-11	133.419	76.0557	133.055	133.782	76.7541	75.3572
Kdm1a	678.3	-0.742222	7.79497e-05	0.000645624	22.5565	12.8963	23.7471	21.3659	14.3652	11.4274
Retsat	373.94	-0.742068	0.00131465	0.00741939	19.9487	11.4028	18.5148	21.3826	12.223	10.5826
Pik3c2b	641.552	-0.741751	0.000577287	0.0036745	7.61762	4.35624	6.22289	9.01234	4.5853	4.12718
Zdhhc14	236.185	-0.74156	0.00768859	0.0322556	2.52999	1.44457	2.74438	2.3156	1.44446	1.44468
Rhot2	1847.98	-0.74147	1.4218e-06	1.88701e-05	67.46	38.5499	58.8844	76.0356	38.9065	38.1933
Arl10	476.151	-0.741312	0.00068551	0.00425124	7.76438	4.44006	6.83348	8.69527	4.66576	4.21435
Bahd1	1063.13	-0.740135	7.92718e-06	8.70376e-05	22.7782	13.034	20.5284	25.0279	13.5535	12.5145
Nit2	2932.89	-0.740134	8.74856e-10	2.27087e-08	238.757	136.663	239.68	237.833	146.68	126.645
Zfp738	538.423	-0.739699	0.000177759	0.0013431	12.5088	7.14923	12.3414	12.6762	6.85734	7.44113
Il17rd	1225.36	-0.739633	7.57943e-06	8.3543e-05	15.5163	8.88243	13.661	17.3716	9.22721	8.53765
Herc2	1263.42	-0.739535	2.75888e-07	4.31583e-06	8.47261	4.84648	8.39437	8.55084	4.9068	4.78616
Ctxn1	690.031	-0.738948	0.000187164	0.0014024	58.8587	33.6482	52.4347	65.2826	31.2992	35.9971
Lbhd2	297.906	-0.738059	0.00873415	0.0358582	34.6968	19.9386	35.5896	33.804	24.9857	14.8915
Dhcr24	420.111	-0.734805	0.000619577	0.00389892	10.9015	6.25836	10.5421	11.2609	6.44255	6.07417
Dlgap4	1112.35	-0.734395	2.91172e-06	3.5855e-05	4.0722	2.34106	4.03768	4.10672	2.57731	2.10482
Pafah1b1	3089.1	-0.734294	3.4163e-09	7.92018e-08	52.2945	30.0231	56.1623	48.4268	30.9697	29.0765
Atp1b2	2169.18	-0.734258	8.71176e-07	1.21413e-05	54.6166	31.4411	51.77	57.4632	36.0136	26.8686
Rab6b	1166.62	-0.73391	4.67356e-05	0.000413955	14.7346	8.44517	13.1858	16.2835	7.51134	9.379
Git1	553.733	-0.73365	0.000201549	0.00149348	15.338	8.82061	15.6076	15.0684	9.73933	7.90189
Slf1	346.945	-0.73331	0.00231611	0.0119216	6.89884	3.96909	6.39712	7.40056	4.37158	3.56659
Lat	1438.68	-0.732784	1.52851e-06	2.01657e-05	95.7786	55.0308	105.698	85.8588	56.2529	53.8086
Capn10	2098.65	-0.732732	6.97714e-07	1.00049e-05	76.2146	43.9151	73.3112	79.1181	50.1868	37.6434
Rcan3	4537.65	-0.730963	8.4162e-10	2.19652e-08	92.362	53.1201	86.916	97.808	52.039	54.2011
Pik3ip1	784.122	-0.730772	2.02345e-05	0.000199457	5.90618	3.39935	6.24134	5.57102	3.50963	3.28908
Cmtr2	847.989	-0.730022	1.92562e-05	0.000191326	19.957	11.5078	19.7055	20.2085	12.6945	10.321
Zfyve1	1569.53	-0.72883	1.1834e-07	2.00695e-06	31.6124	18.2326	31.0136	32.2112	19.3253	17.1399
Frmd6	5468.05	-0.72875	3.08972e-11	1.03134e-09	108.092	62.3637	108.194	107.99	66.778	57.9494
Rnf141	3004.86	-0.727593	1.25321e-09	3.1705e-08	30.0931	17.345	31.0763	29.1099	17.1001	17.59
Spry4	1906.55	-0.727174	1.08851e-07	1.86185e-06	42.4249	24.4822	39.5109	45.3388	24.8335	24.1308
Kiz	2515.01	-0.727044	1.52319e-08	3.15398e-07	48.6874	28.0606	48.176	49.1988	26.7506	29.3707
Wdr82	1039.03	-0.726956	2.42432e-06	3.03778e-05	25.1045	14.4865	24.403	25.8059	14.6438	14.3292
Hipk1	968.947	-0.726833	0.000192462	0.00143563	5.96931	3.4357	6.88947	5.04916	3.09414	3.77725
Gm30494	246.485	-0.726539	0.0124125	0.0479887	4.98964	2.87636	4.33907	5.64021	2.5783	3.17443
Cdk5	613.343	-0.725941	0.000217692	0.0015917	22.1609	12.8151	23.4846	20.8372	14.3771	11.2532
Brdt	1607	-0.725663	1.13612e-06	1.54704e-05	17.4653	10.104	18.3017	16.629	11.3014	8.90667
Nacc1	1369.16	-0.725434	7.04477e-05	0.000592336	30.723	17.7747	25.0659	36.3801	18.8892	16.6603
Cdan1	241.195	-0.724406	0.0127405	0.0489062	3.9415	2.27807	4.61912	3.26387	2.37233	2.18381
Sp1	1655.85	-0.72409	1.30189e-07	2.18747e-06	21.6826	12.5261	21.8663	21.4988	12.1426	12.9096
Rbfa	2681.65	-0.724065	6.94372e-09	1.52479e-07	208.798	120.876	211.198	206.398	131.152	110.6
Zfp759	341.625	-0.723956	0.0029138	0.0143788	7.8204	4.52043	7.07892	8.56189	4.37478	4.66607
Ppfibp2	3015.14	-0.723332	2.11227e-05	0.000206681	35.1083	20.2183	36.9965	33.2202	16.4445	23.9921
Kdm5a	14950.3	-0.723181	1.94605e-13	9.33779e-12	72.6665	42.0162	73.4015	71.9316	41.6968	42.3357
Dynlt1b	832.234	-0.722975	2.50102e-05	0.000239899	24.6887	14.285	26.6437	22.7337	14.6972	13.8727
Ttc3	4641.24	-0.722707	6.18355e-10	1.66124e-08	19.6946	11.4126	20.3707	19.0184	12.3978	10.4273
Cdkn2b	268.849	-0.722144	0.0086538	0.0355575	20.1237	11.6572	23.0213	17.2261	12.6435	10.671
Zfp949	387.623	-0.721744	0.00165261	0.00900691	10.6813	6.19585	10.682	10.6807	6.99659	5.39512
Mcf2l	293.011	-0.721331	0.00369168	0.0175493	4.36885	2.53139	4.44205	4.29565	2.61815	2.44462
Fggy	259.83	-0.720888	0.00653961	0.028212	5.35709	3.1076	5.3252	5.38897	3.40134	2.81386
Phldb1	1560.06	-0.720728	2.80126e-05	0.000264253	17.1904	9.976	14.329	20.0518	10.5297	9.42236
Itgb3	1533.5	-0.720032	9.25399e-07	1.28188e-05	26.7572	15.5202	24.5779	28.9365	15.8588	15.1816
Cdk5rap3	5332.96	-0.719672	9.08719e-11	2.79021e-09	209.218	121.219	211.192	207.244	117.688	124.75
Gm15559	321.723	-0.71948	0.00439836	0.0203231	14.8182	8.579	15.6902	13.9461	7.68014	9.47785
Fastkd1	610.577	-0.718572	9.84621e-05	0.00079688	22.2234	12.9042	22.0906	22.3563	13.4766	12.3318
Cab39	1454.47	-0.717559	3.81905e-07	5.80153e-06	30.2243	17.5627	31.5401	28.9085	18.481	16.6444
Ablim3	233.098	-0.716798	0.0102987	0.041205	4.93061	2.86796	5.16843	4.69279	3.14677	2.58914
Swap70	3572.56	-0.716699	1.60849e-10	4.74958e-09	65.1644	37.8704	65.6434	64.6854	38.5443	37.1964
Cand2	890.94	-0.716448	0.00162542	0.00889637	16.6635	9.68664	12.2603	21.0666	9.40272	9.97056
Dnph1	1033.31	-0.716248	7.55768e-06	8.34396e-05	97.186	56.435	100.65	93.7218	53.8506	59.0194
Kctd21	710.557	-0.716036	0.000173065	0.00131301	23.8252	13.8614	21.0157	26.6347	14.295	13.4278
Epg5	838.553	-0.715853	0.000146352	0.00113538	3.59541	2.09007	3.11074	4.08007	2.02848	2.15166
Elmod3	1253.84	-0.715496	2.74659e-06	3.40526e-05	46.0679	26.8058	42.6697	49.466	27.4794	26.1322
Cenpv	301.397	-0.714428	0.00771437	0.0323501	13.6036	7.93898	12.2869	14.9204	9.30605	6.57191
Zbtb20	2073.57	-0.714188	3.3492e-07	5.15049e-06	6.28365	3.66346	6.6412	5.92609	4.05055	3.27637
Prrg2	470.615	-0.713154	0.00067411	0.00419057	20.9584	12.2222	21.9111	20.0056	13.3729	11.0714
Fbxo10	2391.17	-0.711982	7.72977e-05	0.000641022	41.5867	24.3071	32.7732	50.4002	26.6226	21.9915
Cyp51	2355	-0.711238	1.43207e-08	2.99325e-07	56.2095	32.7695	58.1234	54.2955	32.3878	33.1513
Zfand3	1729.37	-0.710961	1.02183e-07	1.75899e-06	48.4134	28.2697	47.9555	48.8712	29.9433	26.596
Ngrn	625.633	-0.710701	0.00213484	0.0111612	37.7901	21.9978	31.8829	43.6972	18.5223	25.4733
Rhoc	922.351	-0.710081	0.000304296	0.00211645	89.1417	51.8841	84.3607	93.9228	43.3342	60.434
Dcaf6	1309.57	-0.709789	5.22969e-06	6.05509e-05	32.4897	19.0068	30.8904	34.089	21.1185	16.8951
Amdhd2	896.912	-0.70971	0.000197823	0.00147012	63.6513	37.2643	55.7822	71.5203	42.2802	32.2483
Npffr1	290.814	-0.709444	0.00451478	0.0207193	6.25801	3.65403	6.26439	6.25163	3.61496	3.69309
Golgb1	3009.91	-0.709283	6.75152e-09	1.49079e-07	27.7987	16.2384	29.5645	26.0328	16.6975	15.7792
Lrrc45	395.085	-0.709223	0.00139333	0.00779929	11.5464	6.74461	10.9793	12.1135	6.73102	6.7582
Trrap	4597.38	-0.709084	1.12342e-08	2.37046e-07	32.9924	19.3154	31.8467	34.1381	21.4709	17.1598
Zbtb16	14397	-0.708717	4.38625e-08	8.28325e-07	191.995	112.475	171.325	212.666	124.543	100.407
Ppp1r37	347.873	-0.708142	0.00274478	0.0137383	6.63199	3.87287	6.82504	6.43894	3.64154	4.10419
Fnip2	566.774	-0.708126	0.000187047	0.00140204	5.32258	3.11151	5.28915	5.35601	3.14071	3.08231
Ipo4	10516.1	-0.708012	1.4726e-09	3.6606e-08	267.78	156.699	243.181	292.379	163.069	150.329
Hp1bp3	3400.85	-0.707703	7.92438e-06	8.70376e-05	43.8773	25.6385	36.6176	51.1369	24.3218	26.9551
Cmas	574.945	-0.707154	0.00023619	0.0017088	29.5745	17.2989	31.4904	27.6585	17.6239	16.974
Tbl1xr1	893.014	-0.706535	1.90407e-05	0.000189751	6.46759	3.78375	6.19705	6.73813	3.71273	3.85476
Etfb	1167.67	-0.70646	4.83796e-06	5.63569e-05	133.984	78.3554	129.257	138.712	75.1073	81.6035
Polb	1878.32	-0.705961	3.12015e-07	4.84303e-06	67.806	39.6843	63.6625	71.9495	38.9733	40.3952
Rarg	679.088	-0.705736	0.00559888	0.0247858	19.7376	11.6	14.1199	25.3554	13.3615	9.83858
Ing4	967.079	-0.705572	1.0888e-05	0.00011481	61.8847	36.2131	63.443	60.3263	35.0623	37.3638
Zfp995	828.227	-0.704702	2.17813e-05	0.000211673	12.2348	7.17321	12.5038	11.9657	7.54874	6.79767
Adamts10	518.622	-0.70457	0.00415888	0.0194052	9.99	5.84651	7.92318	12.0568	5.22084	6.47219
Gm34771	304.362	-0.704559	0.00885466	0.0362765	6.20926	3.64127	7.2736	5.14492	3.97995	3.30259
Rc3h1	1106.06	-0.703483	0.000340891	0.00232952	9.61973	5.64813	11.5104	7.72901	6.28218	5.01409
Abcb8	2512.81	-0.703089	8.53766e-08	1.50548e-06	45.1082	26.4962	42.2742	47.9422	28.3515	24.6409
Aatf	5026.93	-0.702859	8.32892e-11	2.59366e-09	39.3899	23.1074	38.6496	40.1303	23.1749	23.04
Zswim3	2155.2	-0.70215	1.79321e-06	2.32128e-05	83.0302	48.6723	76.6273	89.4331	45.1207	52.2238
Mccc2	928.869	-0.702042	2.45191e-05	0.000235754	45.3381	26.6536	46.3361	44.3401	29.4429	23.8643
Ahcyl2	279.473	-0.700974	0.00573163	0.0252614	4.44111	2.60998	4.53339	4.34884	2.71392	2.50605
Trim13	714.444	-0.700573	9.65788e-05	0.000784619	11.9915	7.04555	12.8958	11.0872	7.15234	6.93876
Tmem205	222.18	-0.700283	0.0126644	0.0486986	20.8846	12.2796	20.4038	21.3653	12.6622	11.897
Lhfpl2	1039.85	-0.69983	0.000201965	0.00149478	13.9202	8.20295	11.7435	16.0968	9.07606	7.32984
Gm26641	389.046	-0.698673	0.00454636	0.0208477	42.0871	24.8219	46.2489	37.9252	29.3087	20.3351
Smarcd1	1815.1	-0.697758	1.53302e-06	2.02118e-05	59.5843	35.1398	55.0162	64.1525	38.1569	32.1228
E130308A19Rik	1325.42	-0.697259	9.11223e-07	1.264e-05	8.74329	5.15023	8.62195	8.86463	5.22217	5.0783
Parp14	648.395	-0.696467	0.000150985	0.00116633	6.45573	3.80863	6.31187	6.59959	4.10891	3.50835
Rnf111	1522.13	-0.69601	7.56702e-06	8.34966e-05	29.0403	17.1609	27.9445	30.1361	19.5298	14.7921
Psd3	460.796	-0.694598	0.00122943	0.00702167	1.63703	0.96465	1.66403	1.61004	0.885712	1.04359
Bag3	665.038	-0.694492	0.000192008	0.00143433	26.5101	15.6678	25.5112	27.509	17.2463	14.0893
Fdps	10235.7	-0.694471	8.54985e-12	3.14877e-10	724.767	427.872	752.3	697.235	444.346	411.397
Wdr34	1756.36	-0.694306	5.23337e-07	7.69243e-06	100.558	59.3448	107.869	93.2473	60.6464	58.0431
Cd276	1332.38	-0.694152	0.000274475	0.00194421	43.1021	25.5545	39.5932	46.611	31.2977	19.8112
Setd1b	1021.41	-0.69374	3.25023e-05	0.000301617	11.7146	6.90579	11.6544	11.7749	6.32419	7.48739
Acads	1502.52	-0.69345	1.73116e-06	2.25118e-05	83.0742	49.1167	78.2549	87.8934	52.4153	45.8181
Dstn	13096.4	-0.691806	2.47981e-12	1.00814e-10	712.44	421.562	709.159	715.72	443.153	399.972
Tapbp	3623.12	-0.691415	6.06485e-07	8.81722e-06	34.0603	20.1894	36.3847	31.7359	22.9846	17.3943
Larp4	1211.02	-0.690778	1.47545e-05	0.000150416	17.2653	10.2149	19.0835	15.447	10.5489	9.88085
Oxnad1	765.339	-0.690663	0.000146244	0.00113498	35.2252	20.8187	33.5096	36.9407	19.3373	22.3001
Dock6	838.087	-0.690558	0.00260962	0.0131623	10.1196	5.97017	8.24491	11.9944	4.88725	7.05308
Vps39	2983.13	-0.690289	1.7851e-06	2.3138e-05	68.5963	40.5323	62.6737	74.5188	37.152	43.9125
Zfp788	258.54	-0.690056	0.00911511	0.0371568	8.11801	4.80862	7.73065	8.50538	5.04297	4.57427
Nudt8	335.319	-0.689541	0.00955717	0.0386097	44.0662	26.1735	38.0799	50.0525	30.851	21.4961
Jmjd1c	3704.32	-0.689522	1.95866e-09	4.73902e-08	17.9688	10.6469	18.6215	17.3161	11.1893	10.1045
Ell3	2100.33	-0.689303	1.02767e-07	1.76686e-06	129.572	76.7071	125.819	133.324	75.4268	77.9874
Fam169a	4449.28	-0.688636	3.68614e-10	1.03052e-08	80.2401	47.5314	79.4119	81.0682	47.4158	47.6471
Prkar2a	322.126	-0.687569	0.00465293	0.0212387	6.68849	3.9641	7.16013	6.21684	3.918	4.0102
Sall4	14732.5	-0.687481	4.80637e-10	1.31245e-08	276.244	164.15	273.703	278.784	181.34	146.959
Btd	499.951	-0.687465	0.000827093	0.00499837	26.5732	15.7704	24.599	28.5473	16.5173	15.0234
Zmym4	1822.06	-0.687178	7.18479e-07	1.02458e-05	22.1108	13.1255	23.5111	20.7104	14.0673	12.1837
Map7	598.983	-0.68682	0.0044712	0.0205834	8.14054	4.84171	9.8114	6.46967	5.77371	3.90971
Faap20	1386.72	-0.686678	1.4666e-06	1.94002e-05	84.3506	50.0952	83.0178	85.6834	53.3467	46.8438
Thbs3	284.933	-0.686525	0.00784085	0.0327975	7.19931	4.27512	6.57065	7.82798	4.45836	4.09188
Pald1	3559.49	-0.686286	4.72013e-05	0.000417265	81.3503	48.4461	66.8767	95.8238	55.2395	41.6527
Vamp4	3476.19	-0.685422	1.6864e-08	3.46676e-07	67.6197	40.1118	70.5667	64.6727	38.7328	41.4907
Spice1	4144.74	-0.684453	1.26353e-09	3.18854e-08	96.6843	57.4189	96.6445	96.7241	56.3763	58.4615
Ubc	22865.1	-0.684144	8.75817e-07	1.21827e-05	979.792	580.275	1066.63	892.952	506.935	653.615
Phf13	16737	-0.68407	3.75515e-07	5.71316e-06	505.644	301.57	458.549	552.739	345.446	257.694
Arid3a	400.312	-0.683567	0.00198093	0.0105135	6.30181	3.74846	5.94272	6.66091	3.83202	3.6649
Ube2j1	3102.2	-0.683418	8.749e-09	1.88396e-07	89.6214	53.2629	92.3684	86.8744	52.5518	53.974
Zbtb8b	516.33	-0.683387	0.00100713	0.00591973	5.48976	3.26003	5.8375	5.14201	3.02649	3.49357
Jun	2764.41	-0.683118	3.04202e-06	3.72527e-05	89.4594	53.0724	95.7659	83.1528	47.6545	58.4904
Eci1	613.748	-0.682985	0.000349868	0.0023827	57.9997	34.4616	59.5311	56.4684	32.3646	36.5586
Fcsk	944.454	-0.68287	0.00203156	0.010728	23.9413	14.2952	18.5709	29.3117	16.5982	11.9923
Ccdc120	913.529	-0.682867	2.11436e-05	0.000206785	25.8679	15.3899	25.1879	26.5478	15.5399	15.24
Rai1	533.423	-0.682639	0.0030511	0.0149419	3.55993	2.12617	3.38674	3.73313	2.6095	1.64284
Fam193a	1078.47	-0.681249	6.48307e-06	7.29885e-05	20.0596	11.9479	19.8373	20.2819	12.1154	11.7804
Flna	1767.34	-0.680706	0.00049072	0.00320421	21.2292	12.6654	16.0327	26.4257	13.0937	12.2371
Fchsd1	1368.18	-0.680069	0.000181006	0.00136445	32.396	19.3815	29.1259	35.6662	22.9967	15.7663
Supt6	5473.83	-0.67936	1.65068e-08	3.40384e-07	83.7909	50.0644	79.6045	87.9773	54.8639	45.265
Tmem134	1522.26	-0.679199	1.23228e-06	1.66594e-05	51.6749	30.824	49.3257	54.0242	31.1563	30.4918
Cul9	436.437	-0.677084	0.00410226	0.0191903	5.24624	3.1348	4.37556	6.11692	3.14132	3.12828
Cabin1	4157.44	-0.673951	1.21629e-05	0.000126912	40.5581	24.3284	33.7685	47.3476	26.289	22.3678
Zswim1	3639.04	-0.673822	1.62218e-09	3.98764e-08	138.596	82.9954	139.391	137.801	85.5249	80.466
Plekhm1	2145.93	-0.673096	5.22579e-05	0.000455312	36.8497	22.1254	30.9738	42.7257	24.462	19.7888
Pcnp	3053.51	-0.672881	1.19487e-07	2.02373e-06	127.789	76.49	137.695	117.883	75.5648	77.4152
Rdh13	1730.32	-0.672868	6.44209e-07	9.29794e-06	38.956	23.3209	40.169	37.7429	22.8728	23.769
Cstb	1192.52	-0.672674	4.90323e-06	5.70025e-05	203.703	122.111	199.733	207.673	127.202	117.02
Chml	674.323	-0.672528	0.000854723	0.00514354	11.3384	6.81332	10.8346	11.8423	8.01182	5.61481
Cbx8	1527.47	-0.672318	1.75424e-05	0.000175697	40.1513	24.0235	37.7279	42.5747	21.9782	26.0689
Plekho2	740.923	-0.67225	0.00116591	0.00671458	13.1488	7.88832	10.7335	15.5641	8.17041	7.60624
Vars2	1624.56	-0.672109	0.000228863	0.00166242	12.5294	7.52858	10.1814	14.8773	8.32127	6.73588
Tdrd9	8675.25	-0.671954	6.49617e-07	9.36922e-06	170.072	102.26	179.104	161.041	118.933	85.5867
Scmh1	1797.57	-0.671459	3.55193e-06	4.27109e-05	15.7501	9.46385	15.6929	15.8073	10.6509	8.27681
Fam199x	663.851	-0.671346	0.00133406	0.00751177	8.22989	4.94385	9.37172	7.08806	5.64902	4.23867
Plec	1271.89	-0.66989	0.000419871	0.00280115	7.46541	4.49994	7.6899	7.24092	5.55244	3.44745
Tom1l2	855.629	-0.669391	0.000607254	0.0038406	11.9376	7.18926	10.543	13.3322	8.29692	6.08159
Exo5	551.241	-0.665505	0.00161846	0.00886556	28.4202	17.1334	24.6725	32.1679	18.2139	16.0529
Zfp157	1000.18	-0.665446	9.79195e-05	0.000793252	10.8287	6.51782	9.76466	11.8927	6.3218	6.71383
Zfp267	654.545	-0.665358	0.000294221	0.00205996	10.138	6.09975	10.1707	10.1053	5.83066	6.36885
2810021J22Rik	425.896	-0.665303	0.0100151	0.0401834	7.72398	4.63901	6.58575	8.86221	3.82298	5.45504
Auh	689.418	-0.665205	0.00322865	0.0156729	9.99487	6.03859	11.4442	8.54557	7.36049	4.7167
Ift81	1935.35	-0.66491	3.07787e-06	3.75993e-05	57.0307	34.3625	62.6969	51.3645	35.997	32.728
Epb41l4b	557.842	-0.664398	0.00285923	0.014173	5.38492	3.23702	6.1781	4.59173	2.90495	3.56909
Rnf123	445.693	-0.664088	0.00288539	0.0142739	6.7152	4.05328	7.27042	6.15997	4.57011	3.53646
Kyat1	746.563	-0.663731	0.000102989	0.000828934	17.5857	10.6011	17.6051	17.5663	10.6868	10.5154
Snx18	5184.19	-0.663062	1.73968e-07	2.85573e-06	119.56	72.2842	113.591	125.528	80.9129	63.6554
Tor1aip2	6687.39	-0.66201	1.3797e-10	4.10436e-09	84.3108	50.8883	83.4474	85.1742	51.5546	50.2221
Pcmtd2	1492.55	-0.661485	1.36876e-06	1.82877e-05	12.9361	7.81053	13.1676	12.7045	7.92582	7.69525
Nt5el	835.138	-0.660405	0.00176076	0.00950162	39.6535	23.8846	35.7498	43.5571	19.6044	28.1648
Rab3a	1398.36	-0.660195	4.16016e-05	0.000374396	45.8519	27.6952	40.8251	50.8786	26.6636	28.7267
Rsu1	2643.94	-0.659926	5.53489e-08	1.02203e-06	167.911	101.558	172.747	163.075	107.014	96.1028
Wdr81	1170.68	-0.658839	0.00290929	0.0143601	13.6152	8.25371	9.8267	17.4037	8.82746	7.67996
Cep131	393.478	-0.657716	0.0038736	0.0182792	7.98531	4.84203	8.07444	7.89618	5.45993	4.22413
Thumpd2	273.483	-0.657299	0.0105417	0.0419671	3.58977	2.17507	3.47724	3.7023	2.27923	2.07092
Jakmip1	1032.55	-0.656999	3.38797e-05	0.000311503	8.97739	5.43257	9.32	8.63479	5.2446	5.62054
Slc35f5	958.204	-0.656432	3.25207e-05	0.000301647	30.0628	18.2166	29.2806	30.8451	18.4092	18.0241
Tex2	2463.58	-0.656358	7.18604e-07	1.02458e-05	45.8764	27.7614	45.0347	46.718	26.0963	29.4265
Rb1cc1	4710.67	-0.656174	2.56421e-08	5.0778e-07	63.9267	38.7067	68.1819	59.6714	38.0769	39.3364
Tagln2	4887.37	-0.655009	2.62667e-07	4.14474e-06	361.968	220.087	357.351	366.586	248.972	191.202
Rlf	2878.91	-0.654836	5.03834e-06	5.85051e-05	36.0574	21.9206	38.7318	33.3831	24.9579	18.8833
Acvr1b	854.001	-0.654357	0.000193798	0.00144451	19.7957	12.0181	17.8581	21.7332	12.3201	11.7161
Lrp5	436.811	-0.654324	0.00217686	0.0113452	8.60506	5.21813	8.46098	8.74914	5.01361	5.42265
Ypel2	898.764	-0.654308	0.000305923	0.00212549	6.8759	4.17939	7.50762	6.24417	4.72335	3.63542
Pcyox1l	1008.91	-0.654041	3.79633e-05	0.000344605	32.1512	19.5349	31.2242	33.0781	21.0126	18.0572
Fancb	298.041	-0.653748	0.0100204	0.0401963	8.62191	5.23149	7.98733	9.25649	5.03042	5.43256
Tfe3	1974.66	-0.653461	6.9327e-06	7.73958e-05	52.3478	31.8281	47.2748	57.4209	34.0292	29.6271
Fry	424.996	-0.65224	0.00465815	0.0212577	3.38379	2.06126	3.1903	3.57727	2.39067	1.73186
Mob4	2032.17	-0.652212	2.67576e-07	4.2089e-06	73.5404	44.7067	72.3908	74.6899	46.1248	43.2887
Acot13	3557.87	-0.651343	9.89543e-09	2.10354e-07	530.334	322.698	533.673	526.995	339.343	306.053
Galt	577.001	-0.65095	0.0012441	0.00709121	29.2057	17.7762	32.2827	26.1287	19.1976	16.3549
Trappc9	1424.71	-0.65058	2.69254e-05	0.000255446	19.804	12.0508	17.7709	21.8371	12.1069	11.9946
Zfp563	402.485	-0.650369	0.00582048	0.0256134	5.07792	3.09764	4.89352	5.26231	3.63221	2.56307
Tbx3	3868.21	-0.65016	9.05126e-09	1.93646e-07	76.5644	46.6142	79.1736	73.9552	48.6288	44.5996
Pkd1	340.434	-0.649097	0.00845845	0.0349202	2.24101	1.36325	2.06722	2.41479	1.25051	1.476
Gm7694	490.002	-0.648387	0.00942994	0.0382118	13.0475	7.95255	9.94361	16.1513	7.8358	8.06931
Ube2b	10937.8	-0.648082	5.95055e-10	1.6008e-08	368.81	224.547	380.698	356.921	219.281	229.813
Setdb1	5892.79	-0.647928	7.42637e-08	1.32711e-06	129.133	78.762	117.764	140.501	81.3044	76.2196
Wapl	6386.32	-0.647629	7.69402e-07	1.08691e-05	82.6171	50.413	92.4781	72.7561	54.4752	46.3507
G2e3	11170.5	-0.647483	1.74602e-09	4.27111e-08	169.615	103.3	165.791	173.438	99.3658	107.235
Eif2ak4	919.09	-0.647331	4.71279e-05	0.000416801	17.7741	10.8408	18.0884	17.4598	11.2114	10.4703
Gba2	673.278	-0.646901	0.000417716	0.00278957	19.3254	11.7912	18.0106	20.6401	12.0318	11.5507
Pgpep1	1663.62	-0.646824	3.86476e-06	4.59467e-05	30.2765	18.4751	28.3321	32.2209	18.9126	18.0376
Tmem59l	962.742	-0.646706	0.000419244	0.00279837	65.8227	40.0508	64.6357	67.0098	34.649	45.4525
Gnat2	845.887	-0.646012	0.000269381	0.00191561	44.6317	27.2842	46.9897	42.2737	30.6759	23.8926
Garnl3	629.197	-0.64581	0.00042621	0.00283964	13.6476	8.33584	13.3597	13.9354	8.76688	7.90481
Zbtb32	1050.53	-0.645563	3.26205e-05	0.000302292	27.6452	16.8945	27.7025	27.588	18.179	15.61
Usp9x	6144.6	-0.645264	6.58699e-09	1.45768e-07	45.8458	28.0195	43.503	48.1887	29.3648	26.6743
Sh3glb2	4394.92	-0.645217	4.4856e-09	1.01631e-07	111.243	67.9024	113.168	109.318	67.7211	68.0837
Prr5	1717.47	-0.645187	9.92784e-07	1.3648e-05	34.7354	21.2172	34.3263	35.1445	21.7809	20.6534
Dap	438.588	-0.644924	0.00600264	0.026276	30.2267	18.5096	26.8801	33.5732	21.3715	15.6476
Fpgt	679.488	-0.644647	0.000299801	0.00209315	17.9215	10.9452	17.6062	18.2369	10.8417	11.0487
Lasp1	1946.44	-0.644491	0.000231731	0.00168142	51.3541	31.4609	42.4097	60.2985	35.1472	27.7746
Zfp287	1868.91	-0.644366	4.57973e-06	5.37109e-05	17.996	10.979	18.5173	17.4747	10.2843	11.6738
Cars2	1388.53	-0.643649	2.15306e-05	0.00020985	61.0705	37.3149	56.6499	65.4911	36.2496	38.3801
Ndrg2	418.254	-0.643484	0.00442078	0.0203983	7.61629	4.65026	7.25364	7.97894	4.239	5.06152
Atp13a2	1708.72	-0.64266	0.000115314	0.000917774	34.4598	21.1	28.9051	40.0144	21.7801	20.4198
Szt2	783.981	-0.642468	0.00372163	0.0176791	7.22799	4.43582	5.71394	8.74203	5.05563	3.81601
Cd274	771.886	-0.642296	0.00229308	0.0118366	19.6357	12.0499	22.0264	17.2451	14.4598	9.63996
Zfp90	1150.3	-0.642155	0.000296942	0.00207755	29.655	18.1076	27.4823	31.8277	15.9236	20.2915
Zfp558	421.491	-0.641664	0.00805238	0.0335211	8.28407	5.05606	8.37289	8.19526	4.18365	5.92846
Madd	413.852	-0.641388	0.004254	0.0197705	6.51624	3.99672	6.55401	6.47847	4.53063	3.46281
Insig1	9939.08	-0.64111	1.40272e-09	3.49558e-08	382.779	234.68	394.219	371.339	252.071	217.29
Tns2	541.58	-0.640357	0.00683635	0.0293148	10.6196	6.52268	8.45609	12.7832	7.27045	5.7749
Coa8	366.958	-0.639603	0.0051321	0.0230518	19.1802	11.7508	20.0371	18.3234	11.4754	12.0262
Larp1	2196.46	-0.639517	2.44626e-06	3.06335e-05	31.6938	19.4169	29.7767	33.6109	18.7495	20.0842
Dhrs1	779.355	-0.638479	0.000236828	0.00171218	48.9731	30.08	50.1323	47.8139	32.8376	27.3225
Hip1	3127.81	-0.638335	1.65011e-05	0.000166269	32.5826	20.048	29.208	35.9571	22.6937	17.4023
Rest	15240.8	-0.638069	3.53275e-11	1.16365e-09	210.055	128.892	209.525	210.586	130.147	127.637
Robo1	3023.42	-0.636903	1.98624e-06	2.5415e-05	28.2519	17.3821	25.9854	30.5183	18.9032	15.861
Taf1c	781.511	-0.636856	0.00234384	0.0120426	19.6244	12.0845	16.1663	23.0825	13.579	10.5901
Amacr	867.364	-0.636301	0.000291182	0.00204227	33.9039	20.8062	32.161	35.6468	19.3105	22.3018
Zfp106	3238.03	-0.636252	8.22367e-06	8.98482e-05	34.4733	21.2403	36.0054	32.9412	24.5612	17.9193
Trim45	1350.63	-0.635933	8.74157e-06	9.46774e-05	9.70837	5.96929	9.3687	10.048	6.16324	5.77535
Golga4	977.315	-0.635679	7.50581e-05	0.000626091	6.57618	4.04221	7.00437	6.148	4.13755	3.94686
Ccdc93	903.499	-0.635655	9.11238e-05	0.000743327	12.6768	7.78779	12.9134	12.4403	7.61018	7.9654
Ubxn6	2179.94	-0.635314	9.89238e-06	0.000105503	60.0715	36.9745	53.659	66.484	38.7981	35.1509
Arrdc2	606.458	-0.634882	0.0028127	0.0140081	12.6309	7.78932	11.1932	14.0686	8.96628	6.61235
Plin3	2450.71	-0.634676	9.25315e-07	1.28188e-05	115.522	71.1361	108.96	122.084	75.3893	66.8828
Wdr59	1173.11	-0.634482	0.00011406	0.000909243	22.6626	13.938	20.3272	24.9979	13.6044	14.2716
Slc12a7	5215.94	-0.634466	2.16359e-06	2.74205e-05	90.4476	55.7894	82.8422	98.0531	62.5515	49.0273
Rps6ka1	681.949	-0.634418	0.000524393	0.00338641	20.1167	12.3706	21.6186	18.6148	12.3274	12.4138
Map3k5	1387.18	-0.633935	5.33479e-05	0.000463595	19.4946	12.0232	20.0383	18.9509	13.6717	10.3747
Pacs2	739.977	-0.633552	0.000283384	0.00199387	7.87254	4.84748	8.29913	7.44596	5.03371	4.66124
Svip	594.561	-0.633482	0.00104613	0.00612547	18.7021	11.5024	19.8717	17.5325	11.0464	11.9583
Rhob	641.008	-0.633407	0.000508674	0.00330092	27.7634	17.0982	26.802	28.7247	17.5311	16.6653
AI987944	411.952	-0.633303	0.00387856	0.0182939	10.9041	6.72195	10.8329	10.9752	7.36878	6.07512
Ctr9	9030.42	-0.633141	2.51172e-10	7.18286e-09	213.671	131.552	213.466	213.876	132.493	130.611
Iah1	1092	-0.632847	0.000165006	0.00126195	67.5176	41.645	60.5903	74.4449	44.8436	38.4463
Nav2	2068.93	-0.63277	0.000336206	0.0023033	3.10964	1.92387	3.16409	3.0552	2.37503	1.4727
Sphk1	1107.88	-0.632683	0.000192118	0.00143433	26.3435	16.2224	23.3439	29.343	15.8189	16.6258
Nr1d1	2985.48	-0.632465	7.13545e-08	1.28572e-06	109.852	67.7104	112.435	107.27	70.775	64.6458
Mn1	479.051	-0.632156	0.00230687	0.0118955	7.12123	4.3864	7.64788	6.59459	4.38846	4.38434
Gm26944	332.663	-0.631659	0.00733723	0.0310688	2.69446	1.6606	2.77108	2.61783	1.66685	1.65435
Hectd1	2870.74	-0.631336	2.60058e-07	4.11007e-06	31.7055	19.5655	32.9464	30.4646	20.9061	18.2249
Tbl1x	4017.91	-0.63128	2.69094e-08	5.30245e-07	66.8719	41.2715	65.6252	68.1186	43.7535	38.7896
Pcnt	2716.74	-0.631026	1.23015e-06	1.66475e-05	25.5975	15.8042	23.804	27.391	16.7881	14.8203
Fnip1	1152.9	-0.631019	2.89054e-05	0.000271393	18.216	11.2323	19.1719	17.2601	11.4203	11.0443
Gm35315	502.611	-0.630923	0.00431281	0.0199972	9.67501	5.95202	10.1627	9.18735	5.15562	6.74841
Snhg11	653.934	-0.630871	0.00164854	0.00899088	10.875	6.7224	11.4835	10.2665	7.81582	5.62898
3830403N18Rik	424.066	-0.630181	0.00355589	0.0169929	31.5968	19.4914	30.1046	33.089	19.1501	19.8328
Clic1	1567.67	-0.6296	4.83258e-06	5.63452e-05	34.3791	21.2371	35.3658	33.3925	22.519	19.9551
Slc2a8	734.963	-0.629054	0.000312863	0.00216692	35.2615	21.7824	33.6932	36.8298	22.3355	21.2292
Tbc1d25	1557.67	-0.629011	5.01906e-06	5.83151e-05	62.4736	38.6128	61.124	63.8232	40.8631	36.3625
Reep6	929.283	-0.628805	0.000109385	0.000875478	41.2691	25.5125	42.5773	39.9608	27.4692	23.5558
Tro	1390.97	-0.628731	9.51829e-05	0.000773594	18.7554	11.59	16.451	21.0598	11.7692	11.4107
Rad21l	947.213	-0.628385	0.000231925	0.00168222	33.4599	20.6834	36.7838	30.136	22.0544	19.3124
Usp21	1766.96	-0.628152	0.000265587	0.001892	82.1105	50.7987	67.3444	96.8767	52.9195	48.6779
Mfge8	6807.19	-0.627753	3.39288e-08	6.53089e-07	325.218	201.207	303.762	346.674	211.029	191.386
Rtel1	1347.68	-0.627569	4.86934e-05	0.000428746	29.7734	18.3737	30.6717	28.875	16.9687	19.7787
Mrps5	4387.89	-0.627122	5.00999e-08	9.31141e-07	310.761	192.044	300.437	321.085	187.908	196.18
Etfbkmt	607.394	-0.627091	0.00129854	0.007347	10.0634	6.23089	10.6964	9.43038	6.90769	5.55409
Tbcd	1450.15	-0.626572	9.04856e-05	0.000739027	23.0987	14.3264	22.358	23.8395	16.4911	12.1617
Klc2	1141.76	-0.626478	0.000523251	0.00338013	38.6974	23.9799	32.6884	44.7064	25.7951	22.1647
Ap1b1	8794.41	-0.626323	5.67719e-08	1.04541e-06	181.615	112.376	166.713	196.517	112.949	111.803
Prrc2c	4150.59	-0.626307	4.35968e-07	6.53821e-06	40.0653	24.8388	40.1816	39.9489	27.6794	21.9982
Snx10	1470.02	-0.626258	8.80749e-06	9.52363e-05	46.9393	29.0226	46.8292	47.0494	28.2275	29.8177
Rimklb	3173.39	-0.625481	4.2543e-07	6.38977e-06	17.0033	10.5193	18.1794	15.8271	10.4683	10.5703
Cep192	2099.66	-0.62548	1.42039e-06	1.88639e-05	25.0077	15.482	23.8645	26.1508	15.6032	15.3608
1500011B03Rik	2199.94	-0.624903	5.64247e-07	8.2694e-06	128.44	79.5894	130.443	126.437	83.4693	75.7095
Ccdc136	3975.12	-0.62452	1.82719e-08	3.7179e-07	42.9796	26.6386	42.4989	43.4603	27.6876	25.5897
Dhcr7	4701.29	-0.623264	6.89759e-07	9.90951e-06	136.756	84.9787	130.724	142.789	94.5973	75.3601
Ska2	882.951	-0.622811	0.00129469	0.00733353	33.1981	20.5258	35.0026	31.3937	17.4394	23.6123
Lmna	838.852	-0.622606	0.000742959	0.00455672	24.1714	15.0216	26.0943	22.2485	17.123	12.9201
Abhd14a	609.927	-0.622265	0.000874222	0.00524337	18.7266	11.626	19.4954	17.9578	12.3571	10.8949
Hk1	3631.86	-0.621714	1.00716e-05	0.000107218	68.8907	42.8398	60.6873	77.0941	46.434	39.2456
Parl	3503.81	-0.621474	1.76366e-07	2.88797e-06	262.109	162.597	275.585	248.633	160.693	164.501
Znfx1	3115.7	-0.621374	1.39908e-06	1.86304e-05	42.9512	26.6942	39.5418	46.3607	28.1569	25.2315
Ccdc22	774.86	-0.620564	0.000415178	0.00277448	34.8251	21.6584	32.9393	36.7109	23.3453	19.9715
Gcn1	2204.37	-0.620466	0.000728245	0.00448104	25.69	15.9583	19.9739	31.4061	15.5054	16.4112
Tmco4	351.489	-0.620149	0.00982087	0.039531	5.5359	3.44371	4.99417	6.07762	3.68838	3.19904
Igf2bp1	16524.7	-0.620001	2.66676e-10	7.5828e-09	199.889	124.155	205.341	194.436	124.073	124.238
Zfp873	783.698	-0.619493	0.00100567	0.00591286	12.8189	7.95095	12.864	12.7738	7.00449	8.89741
Aox4	615.799	-0.619075	0.00155736	0.0085894	12.4736	7.75587	13.8577	11.0895	8.0053	7.50644
Narf	1104.07	-0.618733	7.09615e-05	0.000595904	25.3535	15.7617	24.195	26.5119	15.3892	16.1343
Pias1	5797.78	-0.61811	1.43586e-08	2.99803e-07	97.0593	60.3798	101.936	92.1827	61.2059	59.5537
Hcfc1r1	910.157	-0.616861	0.000178435	0.00134711	74.1788	46.2534	72.7723	75.5854	50.2426	42.2641
Dgat1	807.944	-0.615518	0.000322652	0.00222776	30.135	18.7726	29.2277	31.0424	18.1203	19.4248
Rab5b	3256.63	-0.615255	6.13277e-06	6.97528e-05	98.0306	61.0886	88.1278	107.933	59.3715	62.8057
Nhlrc3	398.182	-0.615229	0.008045	0.0335034	25.8273	16.0944	23.1088	28.5459	15.3806	16.8083
Ubr2	2777.97	-0.614907	4.25219e-07	6.38977e-06	31.7955	19.8495	31.6686	31.9223	21.2565	18.4425
1110051M20Rik	1706.98	-0.614832	3.96109e-06	4.69799e-05	28.4317	17.7421	28.9597	27.9036	18.6712	16.813
9530077C05Rik	2895.82	-0.614752	4.0783e-07	6.16253e-06	48.3587	30.1568	46.354	50.3633	30.1675	30.1462
Gstt2	345.196	-0.613704	0.0129927	0.049667	19.1258	11.9532	21.092	17.1596	13.4514	10.455
Prpf6	7866.86	-0.613552	4.67863e-09	1.05765e-07	260.564	162.682	250.821	270.308	165.823	159.54
Stk10	1161.49	-0.613484	0.000587978	0.00373778	21.6814	13.5754	19.7596	23.6032	15.7737	11.377
Cluh	2285.71	-0.613292	0.000145147	0.00112822	37.8437	23.6818	32.1844	43.5031	26.1143	21.2493
Drap1	715.674	-0.612929	0.000942466	0.00558733	70.9627	44.2667	67.0719	74.8536	41.3741	47.1594
Sos1	363.884	-0.612919	0.00907541	0.0370383	4.12943	2.58313	4.0419	4.21697	2.90959	2.25668
Gcat	3178.3	-0.612903	4.50333e-07	6.73845e-06	108.011	67.5135	102.67	113.351	71.1081	63.9189
Cplane1	1739.28	-0.610995	4.87497e-06	5.67071e-05	16.4581	10.2894	17.1595	15.7566	10.4037	10.1751
Oga	5445.01	-0.610687	1.29165e-07	2.17208e-06	81.3715	50.9692	83.7751	78.9678	55.6792	46.2592
Dtnb	2177.98	-0.610671	1.31184e-06	1.76335e-05	27.5313	17.2337	27.2492	27.8134	18.2292	16.2381
Ninl	5213.3	-0.609931	9.14704e-09	1.95277e-07	89.2514	55.8682	90.7223	87.7806	57.7407	53.9957
Ocel1	490.429	-0.609926	0.00408924	0.0191429	29.5152	18.4536	27.3107	31.7197	17.331	19.5763
Pip4k2b	592.077	-0.609564	0.00738032	0.0312182	8.94359	5.59315	7.25524	10.6319	5.17935	6.00694
Sptb	726.689	-0.608266	0.007701	0.0323008	7.05759	4.4152	5.54647	8.56871	3.95377	4.87663
Ctsz	2145.52	-0.608122	2.63631e-06	3.27872e-05	150.556	94.4288	145.599	155.512	100.505	88.3521
Pnldc1	4392.66	-0.607578	2.53085e-07	4.01576e-06	124.968	78.4314	118.959	130.977	83.9578	72.9051
Dicer1	2196.14	-0.607307	1.64776e-05	0.000166116	20.0779	12.6089	21.2328	18.9229	14.0767	11.1411
Mrtfa	2087.9	-0.607247	0.000111412	0.000888492	45.6323	28.6447	38.951	52.3137	30.1109	27.1786
Zfp202	637.11	-0.605942	0.00135601	0.00762028	5.40898	3.39843	5.07589	5.74206	3.6766	3.12027
Prr12	625.935	-0.605939	0.00231234	0.0119101	8.61076	5.40665	7.56502	9.6565	5.55399	5.25931
Wac	2328.73	-0.6057	4.46466e-06	5.24847e-05	41.216	25.8507	39.0578	43.3741	25.0747	26.6267
Jund	405.916	-0.605062	0.00624104	0.0271411	7.12303	4.47437	7.6334	6.61266	4.73017	4.21857
Nfatc3	456.933	-0.604935	0.00721124	0.0306263	5.1041	3.21113	5.52604	4.68216	3.69685	2.72542
Nbea	393.308	-0.604601	0.00893673	0.0365545	2.58045	1.62284	2.79142	2.36948	1.81253	1.43315
Qars	5611.76	-0.604031	2.40044e-08	4.8156e-07	226.453	142.326	218.216	234.69	145.367	139.285
Ppfia1	1688.6	-0.603623	2.01484e-05	0.000198846	31.1895	19.6273	32.6121	29.7669	21.4344	17.8202
Glo1	3561.19	-0.603552	1.47584e-07	2.45494e-06	185.279	116.4	190.839	179.719	115.916	116.885
Etv5	10416.1	-0.603058	1.03054e-06	1.41228e-05	213.594	134.176	193.692	233.496	128.482	139.871
Tspyl2	2387.12	-0.603029	8.92598e-05	0.000730211	87.2499	55.0212	91.9513	82.5484	64.4136	45.6288
Prpf8	4034	-0.603015	3.07617e-06	3.75993e-05	54.3928	34.2298	48.9175	59.8681	35.5075	32.952
Dcun1d4	369.787	-0.602459	0.00906507	0.0370112	2.4954	1.56908	2.33323	2.65757	1.52576	1.61241
Prodh	349.317	-0.601598	0.00953909	0.0385523	4.93036	3.10174	4.8494	5.01131	3.02468	3.1788
Tktl1	5598.14	-0.601053	1.78647e-08	3.64619e-07	228.473	143.813	225.221	231.725	143.586	144.04
Wiz	935.523	-0.600766	0.000632158	0.00396683	8.05387	5.08062	7.27015	8.83759	5.55748	4.60375
Stard4	3498.52	-0.600563	2.73953e-07	4.29228e-06	65.1012	40.9707	65.6131	64.5893	39.9434	41.998
Ski	2414.21	-0.600484	7.61561e-06	8.38936e-05	44.5581	28.116	45.6896	43.4266	31.2623	24.9698
Kmt2d	1532.15	-0.600272	0.000331636	0.00227641	6.75491	4.26714	6.02576	7.48407	4.85588	3.6784
Mapk8ip1	712.828	-0.599551	0.00531201	0.0237382	18.353	11.5876	14.7141	21.9919	12.4158	10.7593
Med13	687.52	-0.599275	0.000890528	0.0053243	6.57596	4.15007	6.37192	6.78	4.47215	3.82799
Lypla1	5679.01	-0.599173	5.98978e-08	1.09892e-06	228.691	144.05	226.878	230.505	139.778	148.321
Peak1	677.388	-0.599103	0.00204075	0.0107709	6.07871	3.84108	5.70923	6.4482	4.37007	3.31208
Pbrm1	2242.7	-0.598979	2.50103e-05	0.000239899	26.732	16.8434	29.7325	23.7315	16.8257	16.8612
Tcf20	603.244	-0.598903	0.00381108	0.0180297	4.55438	2.8796	4.58653	4.52224	3.3952	2.364
Ddx11	2634	-0.598763	8.1245e-07	1.13966e-05	49.9436	31.4878	48.8238	51.0634	31.3602	31.6154
Klf7	3236.64	-0.597971	3.12441e-07	4.84587e-06	39.8358	25.122	40.9212	38.7503	24.9183	25.3257
Pfdn5	5794.1	-0.597757	1.45783e-08	3.03438e-07	859.79	542.508	849.151	870.429	545.464	539.551
Med12	1411.21	-0.59757	0.00134463	0.00756062	16.819	10.6026	13.8418	19.7963	9.75035	11.4548
Dusp7	530.843	-0.597354	0.00251403	0.0127821	16.2807	10.2698	16.8987	15.6627	9.97178	10.5678
Scamp1	1958.89	-0.596748	1.30891e-05	0.000135304	44.444	28.0304	46.0758	42.8123	26.6366	29.4241
Erc1	3338.26	-0.596562	2.61782e-07	4.13405e-06	33.3663	21.0842	32.3724	34.3602	21.8008	20.3675
Dctn1	4288.43	-0.596207	0.000199535	0.00148119	52.9096	33.5372	44.5092	61.31	38.2299	28.8445
Zfp977	401.469	-0.595968	0.0126446	0.0486319	22.3431	14.0823	23.1882	21.498	12.0877	16.0769
Chek2	1225.23	-0.595592	9.20993e-05	0.000750671	43.8715	27.7114	46.9897	40.7532	27.5245	27.8984
Rara	1052.09	-0.59501	0.00282428	0.0140447	22.2767	14.0766	17.9066	26.6468	13.3061	14.847
Nme7	1079.45	-0.594976	0.000120805	0.000957277	25.6789	16.2285	26.9945	24.3633	16.1203	16.3367
R3hdm1	5218.5	-0.594868	2.93846e-08	5.73919e-07	101.114	63.9179	100.31	101.918	63.7966	64.0392
Zbtb9	2390.25	-0.594675	4.24181e-05	0.000381229	86.4048	54.5447	81.2946	91.515	49.6934	59.3959
Acbd3	998.566	-0.594437	0.000293889	0.0020598	28.9692	18.3121	31.434	26.5044	18.164	18.4602
Zscan26	499.554	-0.593981	0.00535442	0.0238997	11.5319	7.29915	12.9261	10.1377	7.74199	6.85631
Mbd5	722.501	-0.592922	0.000651494	0.00407026	7.1386	4.52321	7.14342	7.13378	4.78628	4.26015
Plagl2	807.565	-0.592519	0.000757854	0.0046304	15.024	9.52317	13.7571	16.291	9.94508	9.10125
Kif3c	2686.07	-0.592138	6.67225e-06	7.47819e-05	39.4448	25.008	36.1879	42.7017	25.9264	24.0895
Mrpl34	1251.73	-0.591931	4.60389e-05	0.0004088	194.935	123.47	199.253	190.617	122.884	124.056
Galnt11	1906.72	-0.591751	9.55419e-06	0.000102368	46.7901	29.6792	44.7471	48.833	31.4057	27.9527
Lins1	967.586	-0.591248	0.00209136	0.0109684	17.7828	11.3137	17.8008	17.7648	13.7067	8.92076
Tcp11l2	914.182	-0.591124	0.000698597	0.00432131	38.3054	24.2398	39.5637	37.047	22.0509	26.4287
Paf1	5008.68	-0.590433	3.63707e-08	6.96734e-07	257.905	163.538	261.063	254.747	164.025	163.05
Irf8	885.418	-0.590273	0.000481061	0.00315145	25.923	16.4697	25.2391	26.607	18.1562	14.7831
Stat2	1067.37	-0.589613	0.000168018	0.00128218	23.9798	15.2376	24.129	23.8305	16.6138	13.8615
Ctdsp1	1589.24	-0.589553	7.08744e-05	0.000595422	57.5322	36.4992	52.7946	62.2697	35.6151	37.3833
Kdm5d	786.275	-0.588803	0.000681666	0.00423226	13.4784	8.55015	13.8188	13.1379	8.15575	8.94456
Got1	448.216	-0.588447	0.00469065	0.0213914	21.8914	13.9125	21.8155	21.9672	14.6354	13.1896
Tmc6	2170.27	-0.587763	3.2663e-05	0.000302546	42.6174	27.0615	39.1162	46.1187	25.9826	28.1404
Abca2	909.92	-0.587722	0.00464657	0.0212194	8.42813	5.34261	7.20277	9.65349	4.56073	6.12449
Faah	1836.21	-0.587271	0.000150225	0.00116169	35.7696	22.7052	32.5346	39.0047	20.945	24.4654
Strbp	2612.73	-0.586595	2.20745e-06	2.79113e-05	7.30686	4.65227	7.16689	7.44684	4.98376	4.32078
Nfyb	2341.29	-0.586522	0.000146706	0.00113768	80.3088	50.9236	80.7711	79.8466	44.1111	57.7361
Lin54	786.992	-0.586515	0.000888073	0.0053122	12.4118	7.89712	13.467	11.3565	8.33213	7.46211
Pnrc2	1281.1	-0.586354	7.68757e-05	0.000638318	55.4641	35.2466	56.9433	53.985	33.9602	36.533
Zscan18	1570.52	-0.585542	0.000110543	0.000882269	19.4957	12.3846	19.4512	19.5403	11.2877	13.4815
Rspo2	3628.21	-0.584962	2.46564e-06	3.08375e-05	87.882	55.9545	81.2641	94.4998	56.0314	55.8777
2610301B20Rik	1464.11	-0.584143	3.18336e-05	0.0002961	57.0899	36.3541	55.8781	58.3017	35.7987	36.9094
Ppdpf	1074.47	-0.582726	0.000122346	0.000968725	108.023	68.8819	106.076	109.969	69.3971	68.3666
Hif1a	4633.94	-0.58218	6.99579e-08	1.26374e-06	93.1669	59.4443	91.9669	94.367	60.7352	58.1533
Cryzl1	1329.03	-0.581118	3.87013e-05	0.000350666	37.1546	23.7218	37.6414	36.6677	24.2589	23.1848
Pkd2l1	1620.99	-0.580627	2.93361e-05	0.000275049	13.7363	8.7667	13.3399	14.1328	8.52853	9.00488
Nfix	671.42	-0.57994	0.00121553	0.00695418	8.35881	5.33789	8.38553	8.33209	5.22992	5.44586
Zfp53	1308.19	-0.579781	4.54101e-05	0.000403756	12.2386	7.81923	12.3064	12.1709	7.8677	7.77076
Adad2	1701.48	-0.57965	0.000907378	0.00541308	85.1666	54.5685	71.3645	98.9688	60.9442	48.1928
Coq8b	746.151	-0.579208	0.00109457	0.00636805	11.8299	7.56318	11.0098	12.6501	7.61865	7.50771
Lsm10	1418.04	-0.579153	8.89322e-05	0.000727829	128.174	81.8308	132.153	124.195	77.4118	86.2499
Tmub1	423.554	-0.578965	0.00890703	0.0364555	31.9278	20.4464	30.4862	33.3693	22.7743	18.1184
Cd320	2552.58	-0.578197	1.05107e-05	0.000111301	26.4796	16.9693	26.232	26.7272	18.7833	15.1554
Lig4	395.262	-0.577879	0.00962611	0.0388411	9.34503	5.97593	8.94329	9.74676	5.7633	6.18857
Prex1	977.674	-0.577761	0.00112117	0.00649248	15.0061	9.62752	14.5185	15.4937	11.1534	8.10162
Birc6	1618.17	-0.577435	0.000147825	0.00114547	9.5342	6.11234	10.2172	8.85124	6.83612	5.38857
Trafd1	3293.98	-0.576984	4.07694e-06	4.82967e-05	88.9376	57.0196	83.7561	94.1191	61.2558	52.7834
Ogg1	1082.81	-0.576459	0.000404727	0.00271372	46.7228	29.8757	47.2947	46.151	27.5304	32.2211
Map2k5	828.789	-0.576122	0.000890629	0.0053243	11.2266	7.20307	10.8164	11.6368	7.93886	6.46728
Phf21a	2462.99	-0.575728	3.10504e-06	3.78618e-05	21.4754	13.7536	21.3044	21.6465	13.5275	13.9797
Bcl2l1	7913.95	-0.575228	2.67944e-07	4.21136e-06	108.063	69.3684	112.024	104.101	75.5489	63.1879
Arhgap29	6869.67	-0.573588	2.25588e-08	4.53927e-07	114.998	73.7961	114.275	115.721	74.7526	72.8396
Rbbp9	2618.79	-0.573317	7.03765e-05	0.000591987	121.396	78.0841	130.377	112.416	88.5897	67.5785
Ppp3ca	2256.25	-0.573274	2.08019e-05	0.000204344	40.3606	25.925	43.4661	37.255	27.6671	24.1829
Ssbp3	10498.4	-0.57301	6.67122e-07	9.60781e-06	240.725	154.4	262.364	219.085	152.863	155.937
Klhl9	2799.62	-0.572861	6.00443e-05	0.000514176	66.4039	42.5829	60.2077	72.6001	39.8888	45.277
Hsd17b7	1890.21	-0.572573	2.26549e-05	0.000219309	33.8756	21.7569	36.1808	31.5705	22.4859	21.0278
Pdcd6	3565.9	-0.572564	7.96802e-07	1.12165e-05	234.171	150.503	240.997	227.345	159.728	141.278
Plppr3	616.388	-0.572043	0.0023633	0.012127	13.7605	8.85064	13.356	14.165	9.60564	8.09564
Nfat5	685.411	-0.571951	0.00482617	0.0218993	3.2766	2.09948	3.52647	3.02672	1.82967	2.36929
Washc5	4360.86	-0.571888	1.6641e-07	2.74522e-06	104.034	66.8695	105.871	102.198	69.5237	64.2153
Jup	871.727	-0.570847	0.000703386	0.00434146	16.0805	10.3292	16.9279	15.2331	9.96464	10.6938
Klhdc3	11996.3	-0.570838	8.96299e-08	1.56939e-06	506.984	326.184	476.602	537.366	337.495	314.873
Spry1	1249.28	-0.570801	0.00129961	0.0073508	50.1032	32.1149	50.3599	49.8465	27.2692	36.9606
Tmem161a	1261.04	-0.570612	0.000109229	0.00087493	40.0146	25.7297	38.2761	41.753	25.7331	25.7263
Gnpda1	1511.18	-0.57057	5.84176e-05	0.000501753	65.6964	42.2099	65.099	66.2937	40.5443	43.8756
Mtor	3306.56	-0.570282	0.000133633	0.00105018	19.2259	12.3878	16.4178	22.0341	13.2756	11.5
Fbxl20	4256.99	-0.570153	2.30269e-07	3.6948e-06	42.9494	27.6211	44.0379	41.861	27.8291	27.4132
Brat1	4458.85	-0.569541	8.78906e-06	9.50885e-05	114.11	73.4442	102.606	125.614	73.6885	73.1999
Usp20	1447.62	-0.569527	0.000119285	0.00094636	33.6095	21.6612	31.8614	35.3576	23.5532	19.7691
Ralgds	1411.21	-0.56937	5.18915e-05	0.000452713	33.5573	21.6095	32.6169	34.4978	22.4651	20.7539
Map4k1	678.992	-0.569334	0.00155428	0.00857753	19.3828	12.4869	19.7614	19.0042	13.456	11.5179
Sh2d3c	1909.39	-0.569181	2.6059e-05	0.000248526	46.8097	30.1741	45.8814	47.7379	32.8401	27.508
Kif2a	1251.13	-0.568463	8.66058e-05	0.000709663	18.2774	11.7683	18.1259	18.429	11.7409	11.7957
Cd24a	663.059	-0.568456	0.00275304	0.0137609	36.5019	23.5525	35.7239	37.2798	26.5653	20.5398
Dhx35	4394.86	-0.56831	2.04867e-06	2.61133e-05	72.0564	46.4809	68.5202	75.5925	50.1988	42.7629
Zfp846	646.433	-0.568181	0.00207298	0.0109035	4.93128	3.17487	4.74513	5.11744	3.08581	3.26392
Dgkd	5103.51	-0.56759	2.59532e-05	0.000247753	56.2326	36.2462	49.0607	63.4045	36.4028	36.0896
Stx2	911.654	-0.567236	0.000402502	0.00270153	18.122	11.6884	18.2727	17.9713	12.3386	11.0381
Osgep	1680.84	-0.56659	0.000130075	0.00102504	104.4	67.2002	104.622	104.179	61.5377	72.8628
Ndufa6	2863.55	-0.566058	1.73432e-06	2.25383e-05	510.813	329.677	523.816	497.81	344.286	315.067
Tsc2	3769.4	-0.565085	0.000119447	0.00094727	57.887	37.5001	55.58	60.194	44.073	30.9272
Xpot	8561.97	-0.564357	8.95538e-08	1.56939e-06	138.312	89.385	132.242	144.382	92.6436	86.1264
Klc4	3044.23	-0.564338	1.71797e-06	2.2375e-05	101.699	65.7028	98.369	105.029	67.2584	64.1471
Desi1	2101.25	-0.564217	2.14151e-05	0.000209047	67.7372	43.7683	63.4107	72.0637	44.713	42.8237
Sgk3	9254.13	-0.564026	1.12983e-07	1.92757e-06	164.304	106.037	162.562	166.046	102.7	109.374
Rpp21	733.971	-0.56289	0.00109028	0.00634675	36.619	23.6695	36.492	36.7461	23.6108	23.7281
Fam120b	1822.02	-0.562558	7.53259e-05	0.000628062	31.1752	20.1276	31.5442	30.8062	18.7211	21.5341
Exd1	2358.9	-0.562294	0.000351394	0.00239228	38.1668	24.7007	44.2017	32.1319	26.5551	22.8462
Ovca2	464.906	-0.561502	0.00614611	0.0268217	17.5544	11.3587	18.0257	17.083	11.4648	11.2526
Igf2r	1498.31	-0.561096	0.00204489	0.0107898	14.9783	9.70699	12.0601	17.8964	10.0701	9.34386
Plekhb2	6376.91	-0.560849	2.29471e-07	3.6877e-06	98.112	63.4666	97.5368	98.6872	61.8112	65.122
Snx4	6190.74	-0.560473	6.59059e-08	1.19704e-06	252.827	163.715	256.485	249.17	165.952	161.478
Bhlhe41	2677.42	-0.559613	6.51201e-05	0.00055149	43.6117	28.2633	48.8385	38.385	29.5098	27.0168
Stx6	2472.93	-0.559259	2.05752e-05	0.000202416	37.4501	24.3146	37.7004	37.1998	26.8795	21.7497
Ppfibp1	4753.29	-0.559192	1.34447e-06	1.80191e-05	38.1261	24.6917	40.3566	35.8956	24.339	25.0445
Anapc2	11184.6	-0.55787	3.4872e-08	6.70597e-07	369.387	239.601	359.321	379.452	240.136	239.066
Brwd1	4525.27	-0.557719	7.56463e-07	1.07015e-05	18.0999	11.7442	17.3286	18.8713	11.846	11.6424
Ap4s1	419.181	-0.557629	0.00996815	0.040027	3.35539	2.17955	3.32755	3.38322	2.36439	1.9947
Nfil3	467.814	-0.557579	0.0122597	0.0476009	9.20956	5.98442	8.02775	10.3914	6.44015	5.52869
Jarid2	13485.9	-0.557497	1.51311e-08	3.13962e-07	83.06	53.8863	85.4583	80.6617	54.379	53.3935
Gapvd1	2097.13	-0.557032	9.78454e-05	0.000792973	23.2478	15.1234	23.9122	22.5834	17.1114	13.1353
Map4k4	699.542	-0.557012	0.00345223	0.0165689	11.4735	7.45467	12.6871	10.2598	8.11923	6.79012
Cyb5a	818.322	-0.5568	0.00442489	0.0204126	95.7412	62.3443	100.545	90.9377	74.2986	50.3899
Mmgt2	472.166	-0.55647	0.0120581	0.0469918	15.8791	10.3032	14.1216	17.6366	9.65817	10.9483
Zfp87	1077.8	-0.556259	0.000922171	0.00548824	39.5952	25.7092	35.5004	43.69	25.117	26.3014
Bcas3	7946.49	-0.555585	4.24873e-07	6.38977e-06	73.719	47.9781	72.6362	74.8019	52.1362	43.82
Amn1	939.176	-0.555399	0.000608001	0.0038406	12.9223	8.39551	13.7075	12.137	8.46255	8.32847
Tcf4	631.805	-0.554384	0.00284611	0.0141251	1.48177	0.963908	1.57644	1.3871	1.00589	0.921925
Zfp235	707.205	-0.554224	0.00250928	0.0127645	12.8888	8.3767	12.1383	13.6392	7.99415	8.75926
Son	9100.33	-0.553737	2.76751e-06	3.42482e-05	97.6109	63.6371	91.6311	103.591	69.8059	57.4683
Bcr	1097.62	-0.553435	0.00202024	0.0106739	13.7513	8.97232	14.7368	12.7657	10.5111	7.43358
Tmx4	2424.03	-0.552184	2.85502e-05	0.000268436	46.8625	30.5089	50.7514	42.9737	30.7082	30.3095
Mtmr9	1011.95	-0.551944	0.000373883	0.00252558	15.4674	10.0751	15.1113	15.8235	10.106	10.0442
Ccar2	851.017	-0.551895	0.00818181	0.0339678	19.8163	12.961	17.4639	22.1687	15.6346	10.2874
Ampd2	7370.84	-0.551884	5.08665e-07	7.50995e-06	177.472	115.709	167.626	187.318	120.675	110.744
Zfyve26	1020.48	-0.551756	0.00350266	0.0167907	10.7311	7.01633	10.0051	11.4571	8.37259	5.66006
Dennd4c	750.609	-0.550889	0.00731159	0.0309734	8.95829	5.86126	8.64916	9.26743	7.10393	4.61858
Tcf7	2465.25	-0.550529	0.000192016	0.00143433	22.4046	14.6498	23.1414	21.6678	16.9764	12.3232
Ccs	561.969	-0.550512	0.00586327	0.025762	51.2241	33.359	54.5983	47.8499	31.4288	35.2892
Kdm3a	9294.03	-0.550423	6.10034e-08	1.11714e-06	177.825	116.046	181.197	174.453	122.11	109.983
Nadk	4415.98	-0.549765	7.63614e-07	1.0795e-05	130.617	85.2355	126.232	135.002	86.9066	83.5644
Scyl1	3252.81	-0.549438	5.22209e-05	0.000455188	116.944	76.3265	104.101	129.788	76.5263	76.1266
Snx30	619.393	-0.549113	0.00421639	0.0196322	2.6493	1.72965	2.89482	2.40377	1.81139	1.64792
Trip12	37026.1	-0.548634	6.5951e-09	1.45786e-07	273.045	178.412	275.906	270.184	187.382	169.441
Smyd5	1982.4	-0.548454	1.9842e-05	0.000196364	79.042	51.6536	79.7538	78.3302	54.6066	48.7005
Nipbl	3225.5	-0.548369	1.60503e-06	2.10638e-05	28.0581	18.3237	28.5052	27.6109	18.6684	17.979
Xpc	4461.83	-0.548289	2.40968e-06	3.02134e-05	122.012	79.7867	117.074	126.951	85.4117	74.1617
Cln3	3225.54	-0.547287	0.000206397	0.00152363	80.0927	52.5197	80.0949	80.0905	61.7826	43.2568
Usp4	11838	-0.546976	7.73651e-08	1.37637e-06	236.844	154.985	239.676	234.013	165.251	144.719
Arvcf	3047.8	-0.54692	7.67805e-05	0.000637792	20.0096	13.0966	17.7748	22.2444	13.8207	12.3726
Ankrd31	3364.58	-0.546832	8.33566e-06	9.08729e-05	56.0019	36.5872	59.9278	52.076	36.4136	36.7608
Bend4	1767.78	-0.546747	9.20671e-05	0.000750671	21.7047	14.197	23.3259	20.0834	14.9796	13.4145
Acaa1a	924.392	-0.546511	0.000898071	0.00536397	46.1296	30.1659	43.2325	49.0268	30.3138	30.018
Haus7	1604.28	-0.545869	0.000175795	0.00132968	116.771	76.3901	127.459	106.083	78.8507	73.9295
Rpp40	1906.85	-0.545178	2.9378e-05	0.000275183	67.1221	43.9687	66.1949	68.0494	46.5684	41.3689
Pard3	502.584	-0.545111	0.00812111	0.0337649	5.40898	3.53923	5.90313	4.91484	3.57705	3.50142
Stab2	809.31	-0.543944	0.00478027	0.0217256	7.89801	5.17503	6.70127	9.09476	5.17283	5.17723
Ap5z1	523.862	-0.543093	0.00560636	0.0248079	9.76035	6.39677	10.1303	9.39043	6.48471	6.30883
Rars	9781.61	-0.542752	5.14385e-08	9.54241e-07	455.525	298.719	465.575	445.474	308.195	289.243
Rrp8	2133.5	-0.542307	4.67438e-05	0.000413955	66.4227	43.5755	61.9203	70.9252	44.4648	42.6862
Kbtbd2	917.842	-0.541642	0.00108397	0.00631555	20.1377	13.2206	21.4823	18.7931	14.0709	12.3702
Vps13a	1124.8	-0.541425	0.000271795	0.00193017	7.78049	5.10512	7.86565	7.69533	5.15606	5.05418
Sfi1	563.153	-0.54129	0.00674355	0.0289916	5.87542	3.86072	6.24677	5.50407	4.27566	3.44577
Polr1d	1387.58	-0.54119	0.000110092	0.000879373	61.191	40.1554	60.8061	61.5759	40.3666	39.9442
Mapk6	3994.75	-0.540711	0.000378767	0.00255511	90.6112	59.2877	87.5345	93.688	50.4547	68.1207
Bnip3l	10104.7	-0.540661	3.95839e-07	5.9995e-06	271.188	177.925	286.607	255.768	176.89	178.959
Txnip	6799.08	-0.539621	0.000289149	0.00203086	240.556	158.63	212.531	268.582	183.928	133.332
Pdcl3	2410.18	-0.539492	0.000131761	0.00103669	140.078	91.8631	149.862	130.294	85.2834	98.4428
Pcnx	553.664	-0.539454	0.00664555	0.0286134	4.47735	2.9383	4.52336	4.43134	2.73524	3.14136
Serf1	4740.85	-0.538859	1.26994e-06	1.71048e-05	398.951	262.092	412.914	384.987	259.585	264.599
Wwox	958.804	-0.538797	0.000684423	0.00424674	4.71466	3.10098	4.88135	4.54796	3.26207	2.93989
Kdm3b	1162.62	-0.53854	0.000259985	0.00185739	16.203	10.6589	16.1706	16.2354	11.114	10.2038
Plcg1	1311.65	-0.538409	0.000375645	0.00253576	29.3042	19.2847	27.0948	31.5136	20.1247	18.4447
Pex10	521.021	-0.537788	0.00934857	0.0379591	31.3305	20.5917	29.2289	33.4321	19.3208	21.8626
Phc1	2223.14	-0.537198	2.45339e-05	0.000235783	41.0544	27.008	39.898	42.2109	26.6482	27.3677
Pmm1	2295.18	-0.536675	4.06075e-05	0.000366606	164.589	108.295	156.891	172.287	105.477	111.114
Macroh2a1	4554.44	-0.536562	1.80384e-06	2.33202e-05	53.0418	34.9541	54.6561	51.4274	37.1861	32.7221
Acy1	1576.54	-0.534724	8.21503e-05	0.000676486	107.937	71.1883	105.433	110.44	73.6099	68.7666
Rnf181	2798.32	-0.534414	6.47263e-06	7.29532e-05	69.7527	46.0156	71.2713	68.2341	47.9829	44.0484
Mospd3	1008.19	-0.534156	0.00248583	0.0126646	57.1758	37.8108	56.6209	57.7307	44.0526	31.569
Cspp1	1105.75	-0.533832	0.000764735	0.0046681	23.1109	15.234	21.9264	24.2955	14.612	15.856
[truncated: 47,999 more rows]
