# Supplementary material for: The SMARCA5–DMRT1 Pioneer Complex Establishes Epigenetic Priming to Direct Male Germline Development
Source: Research Square preprint supplement (doi:10.21203/rs.3.rs-7576931/v1), 2025-10-08
Supplement: Supplementary file 5 [file c9a8c9d8f421494c5385eb4a.xlsx]

## Sheet: P8 Aundiff SMARCA5
Supplementary Table 4: SMARCA5 peaks in eash sample, listed in sepaeate tabs.
Chr	Start	End	Annotation	Detailed Annotation	Distance to TSS	Nearest PromoterID	Entrez ID	Nearest Unigene	Nearest Refseq	Nearest Ensembl	Gene Name	Gene Alias	Gene Description	Gene Type
chr12	3109814	3110134	Intergenic	GSAT_MM|Satellite|Satellite	-125817	NR_015551	74173	Mm.309774	NM_028796	ENSMUSG00000079179	Rab10os	1700012B15Rik|1810036A22Rik	RAB10, member RAS oncogene family, opposite strand	ncRNA
chr9	35305212	35305670	Intergenic	GSAT_MM|Satellite|Satellite	24336	NR_040715	71133	Mm.158577	NR_040715	ENSMUSG00000111746	4933422A05Rik	-	RIKEN cDNA 4933422A05 gene	ncRNA
chr6	103649053	103649352	intron (NM_007697, intron 4 of 26)	SYNREP_MM|Satellite|Satellite	138326	NM_007697	12661	Mm.251288	NM_007697	ENSMUSG00000030077	Chl1	A530023M13Rik|AI465420|CALL|LICAM2	cell adhesion molecule L1-like	protein-coding
chr3	159939351	159939731	TTS (NM_001356350)	TTS (NM_001356350)	99891	NM_026582	68151	Mm.6766	NM_026582	ENSMUSG00000028173	Wls	5031439A09Rik|AI173978|AI987742|EVI|Gpr177	wntless WNT ligand secretion mediator	protein-coding
chr19	61331233	61331607	Intergenic	(TTAGGG)n|Simple_repeat|Simple_repeat	-103002	NM_009970	12982	Mm.287228	NM_009970	ENSMUSG00000059326	Csf2ra	CD116|Csfgmra|GM-CSF-Ra|GM-CSFR	colony stimulating factor 2 receptor, alpha, low-affinity (granulocyte-macrophage)	protein-coding
chrX	170758160	170758533	Intergenic	(TTAGGG)n|Simple_repeat|Simple_repeat	85702	NM_001199212	107626	Mm.486144	NM_001199212	ENSMUSG00000093806	Asmt	Hiomt	acetylserotonin O-methyltransferase	protein-coding
chr1	195371641	195372020	Intergenic	(TTAGGG)n|Simple_repeat|Simple_repeat	-195111	NM_001368765	12902	Mm.235387	NM_007758	ENSMUSG00000026616	Cr2	C3DR|CD21|CD35|Cr-1|Cr-2|Cr1	complement receptor 2	protein-coding
chr16	98107228	98107811	Intergenic	(TTAGGG)n|Simple_repeat|Simple_repeat	-25080	NR_015491	320586	Mm.442230	NR_015491	ENSMUSG00000116673	A630089N07Rik	-	RIKEN cDNA A630089N07 gene	ncRNA
chr12	120028630	120029071	Intergenic	(TTAGGG)n|Simple_repeat|Simple_repeat	82888	NM_001294154	217951	Mm.387395	NM_001160385	ENSMUSG00000048004	Tmem196	Gm528	transmembrane protein 196	protein-coding
chr18	90602090	90602653	Intergenic	(TTAGGG)n|Simple_repeat|Simple_repeat	22546	NM_001362365	108168395	Mm.391131	NM_001362365	ENSMUSG00000110277	Gm45871	-	predicted gene 45871	protein-coding
chr7	145340918	145341477	Intergenic	(TTAGGG)n|Simple_repeat|Simple_repeat	26362	NM_203490	211578	Mm.370299	NM_203490	ENSMUSG00000051207	Mrgprd	Gm499|Mgrd|MrgD|TGR7	MAS-related GPR, member D	protein-coding
chr2	98666253	98667328	Intergenic	GSAT_MM|Satellite|Satellite	1199133	NM_178725	241568	Mm.241682	NM_178725	ENSMUSG00000050587	Lrrc4c	6430556C10Rik|NGL-1	leucine rich repeat containing 4C	protein-coding
chr14	124801544	124802251	Intergenic	(TTAGGG)n|Simple_repeat|Simple_repeat	-124770	NM_207667	14169	Mm.206362	NM_010201	ENSMUSG00000025551	Fgf14	FHF-4|Fhf4|Tg(tetO-MAPT*P301L)4510Kha|mFHF-4(1B)	fibroblast growth factor 14	protein-coding
chr2	182012658	182013244	Intergenic	(TTAGGG)n|Simple_repeat|Simple_repeat	21725	NM_001205282	672125	Mm.489571	NM_001205282	ENSMUSG00000098505	Gm14496	-	predicted gene 14496	protein-coding
chrX	170880883	170881315	Intergenic	(TTAGGG)n|Simple_repeat|Simple_repeat	208455	NM_001199212	107626	Mm.486144	NM_001199212	ENSMUSG00000093806	Asmt	Hiomt	acetylserotonin O-methyltransferase	protein-coding
chr13	120321314	120321683	Intergenic	(TTAGGG)n|Simple_repeat|Simple_repeat	4636	NM_153523	236219	Mm.302175	NM_153523	ENSMUSG00000095821	Tcstv3	-	2-cell-stage, variable group, member 3	protein-coding
chr12	69653996	69654355	intron (NM_001135559, intron 2 of 22)	intron (NM_001135559, intron 2 of 22)	27677	NM_001135559	20663	Mm.3770	NM_001135559	ENSMUSG00000034801	Sos2	SOS-2|mSOS-2	SOS Ras/Rho guanine nucleotide exchange factor 2	protein-coding
chr2	57629424	57629781	Intergenic	(TTAGGG)n|Simple_repeat|Simple_repeat	-368553	NM_172855	241391	Mm.484118	NM_172855	ENSMUSG00000026828	Galnt5	4832424J23	polypeptide N-acetylgalactosaminyltransferase 5	protein-coding
chr17	24342763	24343131	intron (NM_001031621, intron 3 of 30)	Lx7|LINE|L1	8112	NM_001031621	381072	Mm.328842	NM_001031621	ENSMUSG00000035435	Abca17	-	ATP-binding cassette, sub-family A (ABC1), member 17	protein-coding
chr11	121982318	121982578	Intergenic	(TTAGGG)n|Simple_repeat|Simple_repeat	152230	NM_029049	74675	Mm.61213	NM_029049	ENSMUSG00000039198	Ptchd3	4930451E13Rik|4933440L20Rik|RNDEu-3	patched domain containing 3	protein-coding
chr14	19416898	19418317	Intergenic	GSAT_MM|Satellite|Satellite	184980	NM_001024706	432825	Mm.327147	NM_001024706	ENSMUSG00000095024	Gm5458	EG432825	predicted gene 5458	protein-coding
chr18	11288541	11288851	Intergenic	(CCCA)n|Simple_repeat|Simple_repeat	-236129	NR_105022	68434	Mm.57626	NR_105022	ENSMUSG00000097222	1010001N08Rik	Gata6as	RIKEN cDNA 1010001N08 gene	ncRNA
chr10	130594345	130595022	Intergenic	(TTAGGG)n|Simple_repeat|Simple_repeat	-97304	NM_001103366	625131	Mm.469844	NM_001103366	ENSMUSG00000091511	Vmn2r87	EG625131	vomeronasal 2, receptor 87	protein-coding
chr14	19418537	19418986	Intergenic	GSAT_MM|Satellite|Satellite	183826	NM_001024706	432825	Mm.327147	NM_001024706	ENSMUSG00000095024	Gm5458	EG432825	predicted gene 5458	protein-coding
chr12	93576964	93577251	Intergenic	(TTAGGG)n|Simple_repeat|Simple_repeat	-132284	NR_126436	75295	Mm.243878	NR_126436	ENSMUSG00000113164	4930559C10Rik	-	RIKEN cDNA 4930559C10 gene	ncRNA
chr12	97061368	97061857	Intergenic	Intergenic	-1014390	NR_103800	69423	Mm.46121	NM_027076		1700019M22Rik	-	NFX-like protein	pseudo
chr2	135988492	135988829	intron (NM_001355153, intron 31 of 38)	intron (NM_001355153, intron 31 of 38)	-63679	NM_001356548	76161	Mm.41638	NM_029530	ENSMUSG00000027270	Lamp5	3110035N03Rik|6330527O06Rik|BAD-LAMP|LAMP-5	lysosomal-associated membrane protein family, member 5	protein-coding
chrX	76598598	76599142	intron (NM_001201395, intron 1 of 1)	SYNREP_MM|Satellite|Satellite	4054	NM_001201395	74987	Mm.107996	NM_001201395	ENSMUSG00000079525	Cldn34d	4930468A15Rik	claudin 34D	protein-coding
chr4	153152989	153153374	Intergenic	(TTAGGG)n|Simple_repeat|Simple_repeat	329649	NM_001099299	230959	Mm.318874	NM_001099299	ENSMUSG00000039546	Ajap1	Gm573	adherens junction associated protein 1	protein-coding
chr3	96044525	96045021	intron (NM_013841, intron 7 of 14)	intron (NM_013841, intron 7 of 14)	13682	NM_013841	22365	Mm.263185	NM_013841	ENSMUSG00000015747	Vps45	AI462172|AW554165|mVps45	vacuolar protein sorting 45	protein-coding
chr2	98662217	98662960	Intergenic	SYNREP_MM|Satellite|Satellite	1194931	NM_178725	241568	Mm.241682	NM_178725	ENSMUSG00000050587	Lrrc4c	6430556C10Rik|NGL-1	leucine rich repeat containing 4C	protein-coding
chr9	3024048	3024650	Intergenic	GSAT_MM|Satellite|Satellite	14394	NR_039546	100628572		NR_039546	ENSMUSG00000106183	Mir101c	mir-101c|mmu-mir-101c	microRNA 101c	ncRNA
chr16	93789115	93789406	intron (NM_027293, intron 26 of 36)	(CCCTAA)n|Simple_repeat|Simple_repeat	5641	NR_151466	102633000	Mm.443436	NR_151466		2310043M15Rik	-	RIKEN cDNA 2310043M15 gene	ncRNA
chr13	13860623	13861024	Intergenic	(TTAGGG)n|Simple_repeat|Simple_repeat	76516	NM_010317	14706	Mm.215394	NM_010317	ENSMUSG00000021303	Gng4	-	guanine nucleotide binding protein (G protein), gamma 4	protein-coding
chr6	4923767	4924222	intron (NM_001363809, intron 2 of 15)	(CCCTAA)n|Simple_repeat|Simple_repeat	20683	NM_181595	243725	Mm.332901	NM_181595	ENSMUSG00000032827	Ppp1r9a	2810430P21Rik|4930518N04Rik|5330407E15|A230094E16Rik|BB181831|NRB|neurabin-I	protein phosphatase 1, regulatory subunit 9A	protein-coding
chr3	35680435	35680983	Intergenic	(TG)n|Simple_repeat|Simple_repeat	-14546	NR_040748	625963	Mm.251506	NR_040748	ENSMUSG00000105662	Gm6639	-	predicted gene 6639	ncRNA
chr8	83756730	83757066	Intergenic	(CCCTAA)n|Simple_repeat|Simple_repeat	-15587	NM_001163031	26364	Mm.334648	NM_011925	ENSMUSG00000002885	Adgre5	AA409984|Cd97|TM7LN1	adhesion G protein-coupled receptor E5	protein-coding
chr17	13305936	13306256	Intergenic	(CTGTG)n|Simple_repeat|Simple_repeat	-48476	NM_001167578	100041352	Mm.432087	NM_001167578	ENSMUSG00000052469	Tcp10c	D17Leh66C|D17Leh66ca|Gm9880|T66C-a|Tcp-10c	t-complex protein 10c	protein-coding
chr9	3000091	3001514	Intergenic	GSAT_MM|Satellite|Satellite	37941	NR_039546	100628572		NR_039546	ENSMUSG00000106183	Mir101c	mir-101c|mmu-mir-101c	microRNA 101c	ncRNA
chr5	151734486	151734739	Intergenic	(TTAGGG)n|Simple_repeat|Simple_repeat	-83404	NM_027009	69263	Mm.12553	NM_027009	ENSMUSG00000033970	Rfc3	2810416I22Rik|38kDa|AU022547|Recc3	replication factor C (activator 1) 3	protein-coding
chr14	86198946	86199194	Intergenic	(TTAGGG)n|Simple_repeat|Simple_repeat	-46900	NR_040457	75155	Mm.399239	NR_040457	ENSMUSG00000115271	4930529K09Rik	4930507G21Rik	RIKEN cDNA 4930529K09 gene	ncRNA
chr5	67155544	67156056	Intergenic	(CCCCAG)n|Simple_repeat|Simple_repeat	-56674	NM_008888	18935	Mm.62505	NM_008888	ENSMUSG00000012520	Phox2b	Dilp1|NBPhox|Pmx2b|Px2b	paired-like homeobox 2b	protein-coding
chr3	149052481	149052963	Intergenic	(TTAGGG)n|Simple_repeat|Simple_repeat	-98087	NM_001081298	99633	Mm.9776	NM_001081298	ENSMUSG00000028184	Adgrl2	AI450192|CIRL-2|Gm619|Lec1|Lphh1|Lphn2|mKIAA0786	adhesion G protein-coupled receptor L2	protein-coding
chr13	110743981	110744564	Intergenic	(CCCTAA)n|Simple_repeat|Simple_repeat	-159227	NR_131193	75139	Mm.490931	NR_131193	ENSMUSG00000114472	Gm38397	-	predicted gene, 38397	ncRNA
chr4	89264644	89264964	Intergenic	(CAGGG)n|Simple_repeat|Simple_repeat	17388	NM_001040654	12578	Mm.4733	NM_009877	ENSMUSG00000044303	Cdkn2a	ARF-INK4a|Arf|INK4a-ARF|Ink4a/Arf|MTS1|Pctr1|p16|p16(INK4a)|p16INK4a|p19<ARF>|p19ARF	cyclin dependent kinase inhibitor 2A	protein-coding
chr10	69910532	69910886	intron (NM_170689, intron 23 of 41)	intron (NM_170689, intron 23 of 41)	-14823	NM_009670	11735	Mm.235960	NM_009670	ENSMUSG00000069601	Ank3	2900054D09Rik|AI314020|Ank-3|AnkG|Ankyrin-3|Ankyrin-G	ankyrin 3, epithelial	protein-coding
chr4	83623112	83623553	intron (NM_001355378, intron 10 of 25)	intron (NM_001355378, intron 10 of 25)	97756	NM_001369173	320226	Mm.180032	NM_029117	ENSMUSG00000052407	Ccdc171	4930418J05Rik|4930473A06Rik|A330015D16Rik	coiled-coil domain containing 171	protein-coding
chr17	80468387	80468821	intron (NM_009231, intron 1 of 21)	(CACAC)n|Simple_repeat|Simple_repeat	11849	NM_009231	20662	Mm.60975	NM_009231	ENSMUSG00000024241	Sos1	4430401P03Rik|9630010N06|AI449023	SOS Ras/Rac guanine nucleotide exchange factor 1	protein-coding
chr9	96852910	96853206	intron (NM_001289645, intron 3 of 6)	(TTAGGG)n|Simple_repeat|Simple_repeat	36416	NM_153420	235534	Mm.233031	NM_153420	ENSMUSG00000043587	Pxylp1	9430094M07Rik|Acpl2|BB177120|C130099A20Rik	2-phosphoxylose phosphatase 1	protein-coding
chr11	12375008	12375286	intron (NM_001282993, intron 4 of 13)	intron (NM_001282993, intron 4 of 13)	36993	NM_001282994	12808	Mm.22847	NM_172496	ENSMUSG00000020173	Cobl	-	cordon-bleu WH2 repeat	protein-coding
chr2	66189218	66189465	intron (NM_001047604, intron 26 of 28)	(CCCTAA)n|Simple_repeat|Simple_repeat	-64548	NM_015736	14425	Mm.439760	NM_015736	ENSMUSG00000026994	Galnt3	-	polypeptide N-acetylgalactosaminyltransferase 3	protein-coding
chr13	95215643	95216255	intron (NM_001170669, intron 1 of 18)	intron (NM_001170669, intron 1 of 18)	7101	NM_001170669	218461	Mm.100167	NM_172263	ENSMUSG00000021684	Pde8b	B230331L10Rik|C030047E14Rik	phosphodiesterase 8B	protein-coding
chr2	129658090	129658482	Intergenic	Intergenic	40372	NM_001286502	18610	Mm.6239	NM_018863	ENSMUSG00000027400	Pdyn	Dyn	prodynorphin	protein-coding
chr9	64671485	64672198	intron (NM_172522, intron 9 of 22)	C-rich|Low_complexity|Low_complexity	65915	NM_017382	53869	Mm.1387	NM_017382	ENSMUSG00000004771	Rab11a	-	RAB11A, member RAS oncogene family	protein-coding
chr17	88820024	88820671	Intergenic	ORR1B2|LTR|ERVL-MaLR	-28333	NR_157357	16867	Mm.1644	NM_013582	ENSMUSG00000024107	Lhcgr	Gpcr19-rs1|LH-R|LH/CG-R|LSH-R|Lhr	luteinizing hormone/choriogonadotropin receptor	protein-coding
chr18	78499158	78499472	intron (NM_030683, intron 2 of 11)	G-rich|Low_complexity|Low_complexity	97635	NM_030683	27411	Mm.44158	NM_030683	ENSMUSG00000024552	Slc14a2	UT-A1|UT-A3	solute carrier family 14 (urea transporter), member 2	protein-coding
chr7	30475840	30476387	intron (NM_019459, intron 22 of 29)	ZP3AR|Satellite|Satellite	-10522	NR_004443	445267	Mm.398140	NR_004443	ENSMUSG00000087009	Nphs1os	Nphs1as	nephrosis 1 homolog, nephrin, opposite strand	ncRNA
chr15	36472228	36472582	Intergenic	Intergenic	24329	NM_001358007	68839	Mm.396537	NM_175134	ENSMUSG00000048307	Ankrd46	1110054N06Rik|AI314978|AI987733	ankyrin repeat domain 46	protein-coding
chr10	120216775	120217325	intron (NM_026617, intron 2 of 6)	intron (NM_026617, intron 2 of 6)	8224	NM_026617	68212	Mm.157426	NM_026617	ENSMUSG00000020225	Tmbim4	0610007H07Rik|AU022431	transmembrane BAX inhibitor motif containing 4	protein-coding
chr4	105004615	105004969	intron (NM_001162980, intron 15 of 19)	intron (NM_001162980, intron 15 of 19)	91231	NR_104376	242594	Mm.65181	NM_001162980	ENSMUSG00000078612	Fyb2	1700024P16Rik|ARAP|C1orf168|Gm620	FYN binding protein 2	protein-coding
chr2	98664978	98665208	Intergenic	SYNREP_MM|Satellite|Satellite	1197436	NM_178725	241568	Mm.241682	NM_178725	ENSMUSG00000050587	Lrrc4c	6430556C10Rik|NGL-1	leucine rich repeat containing 4C	protein-coding
chr8	47390673	47391185	Intergenic	ORR1A2|LTR|ERVL-MaLR	-38581	NM_175162	71069	Mm.23973	NM_175162	ENSMUSG00000038143	Stox2	4933409N07Rik|AI449080|AI835114|mKIAA1392	storkhead box 2	protein-coding
chr17	3352906	3353409	intron (NM_001122998, intron 1 of 26)	intron (NM_001122998, intron 1 of 26)	26584	NM_001122998	24001	Mm.137134	NM_011878	ENSMUSG00000023800	Tiam2	3000002F19Rik|STEF|mKIAA2016	T cell lymphoma invasion and metastasis 2	protein-coding
chr9	3006670	3006915	Intergenic	GSAT_MM|Satellite|Satellite	31951	NR_039546	100628572		NR_039546	ENSMUSG00000106183	Mir101c	mir-101c|mmu-mir-101c	microRNA 101c	ncRNA
chr9	3023442	3023738	Intergenic	GSAT_MM|Satellite|Satellite	15153	NR_039546	100628572		NR_039546	ENSMUSG00000106183	Mir101c	mir-101c|mmu-mir-101c	microRNA 101c	ncRNA
chr6	49367399	49367980	promoter-TSS (NM_001172216)	promoter-TSS (NM_001172216)	-50	NM_172727	231946	Mm.35199	NM_172727	ENSMUSG00000047115	Fam221a	D330028D13Rik	family with sequence similarity 221, member A	protein-coding
chr6	142770775	142771108	intron (NM_009908, intron 5 of 7)	intron (NM_009908, intron 5 of 7)	14255	NM_009908	12764	Mm.3820	NM_009908	ENSMUSG00000030282	Cmas	AW208911|CMPNeu5Ac|D6Bwg0250e	cytidine monophospho-N-acetylneuraminic acid synthetase	protein-coding
chr9	101097568	101097838	intron (NM_001100451, intron 1 of 1)	intron (NM_001100451, intron 1 of 1)	22941	NM_001100451	77853	Mm.326206	NM_001100451	ENSMUSG00000066415	Msl2	E130103E02Rik|Msl2l1|Rnf184	MSL complex subunit 2	protein-coding
chr8	8836058	8836596	Intergenic	(CAGC)n|Simple_repeat|Simple_repeat	-145790	NM_176849	234023	Mm.251655	NM_176849	ENSMUSG00000040459	Arglu1	9430010O03Rik|C130008N12	arginine and glutamate rich 1	protein-coding
chr2	160957479	160958060	intron (NR_126509, intron 33 of 35)	intron (NR_126509, intron 33 of 35)	-45430	NM_001291145	280635	Mm.330747	NM_182840	ENSMUSG00000050700	Emilin3	1110013O17Rik|EMILIN-3|EMILIN-5|EMILIN-T|Emilin5	elastin microfibril interfacer 3	protein-coding
chrX	126016299	126016652	Intergenic	Intergenic	817529	NM_177705	237029	Mm.60998	NM_177705	ENSMUSG00000058670	4932411N23Rik	-	RIKEN cDNA 4932411N23 gene	protein-coding
chr15	75086016	75087009	Intergenic	B1_Mur4|SINE|Alu	25425	NM_001357693	100041546	Mm.482110	NM_001099217	ENSMUSG00000022584	Ly6c2	Ly-6C.2|Ly-6C2	lymphocyte antigen 6 complex, locus C2	protein-coding
chr10	19591541	19592215	promoter-TSS (NM_010511)	promoter-TSS (NM_010511)	-71	NM_010511	15979	Mm.549	NM_010511	ENSMUSG00000020009	Ifngr1	CD119|IFN-gammaR|Ifgr|Ifngr|Nktar	interferon gamma receptor 1	protein-coding
chr8	109446864	109447163	Intergenic	Intergenic	-47014	NM_019938	56523	Mm.42166	NM_019938	ENSMUSG00000031727	Pmfbp1	1700016D22Rik|F77|Stap	polyamine modulated factor 1 binding protein 1	protein-coding
chr15	40038273	40038768	Intergenic	Intergenic	-6668	NR_155348	102636079	Mm.421381	NR_155348	ENSMUSG00000115142	Gm33251	-	predicted gene, 33251	ncRNA
chr3	148639494	148640197	Intergenic	MTC|LTR|ERVL-MaLR	314790	NM_001081298	99633	Mm.9776	NM_001081298	ENSMUSG00000028184	Adgrl2	AI450192|CIRL-2|Gm619|Lec1|Lphh1|Lphn2|mKIAA0786	adhesion G protein-coupled receptor L2	protein-coding
chr18	84625491	84625834	intron (NM_177450, intron 7 of 11)	(CAGCC)n|Simple_repeat|Simple_repeat	24433	NM_177450	338403	Mm.23278	NM_177450	ENSMUSG00000056162	Cndp1	AI746433|Cn1	carnosine dipeptidase 1 (metallopeptidase M20 family)	protein-coding
chr2	165511040	165511821	intron (NM_130451, intron 1 of 4)	(CCCCAG)n|Simple_repeat|Simple_repeat	7533	NM_130451	170441	Mm.34147	NM_130451	ENSMUSG00000027661	Slc2a10	AA450473|Glut10	solute carrier family 2 (facilitated glucose transporter), member 10	protein-coding
chr1	20743863	20744367	Intergenic	G-rich|Low_complexity|Low_complexity	13210	NM_010552	16171	Mm.5419	NM_010552	ENSMUSG00000025929	Il17a	Ctla-8|Ctla8|IL-17|IL-17A|Il17	interleukin 17A	protein-coding
chr3	33970072	33970444	Intergenic	Intergenic	-49821	NM_008053	14359	Mm.259021	NM_008053	ENSMUSG00000027680	Fxr1	1110050J02Rik|9530073J07Rik|AI851072|Fxr1h|Fxr1p	fragile X mental retardation gene 1, autosomal homolog	protein-coding
chr17	13551810	13553142	intron (NR_045436, intron 1 of 4)	(CTGTG)n|Simple_repeat|Simple_repeat	1618	NR_045437	72578	Mm.46549	NR_045436	ENSMUSG00000117042	2700054A10Rik	-	RIKEN cDNA 2700054A10 gene	ncRNA
chr7	44738535	44739190	intron (NM_001289836, intron 3 of 4)	intron (NM_001289836, intron 3 of 4)	9487	NM_001289836	243963	Mm.382935	NM_178734	ENSMUSG00000048012	Zfp473	D030014N22Rik|Znf473|zfp-100	zinc finger protein 473	protein-coding
chr5	28099191	28099467	Intergenic	(CAGAC)n|Simple_repeat|Simple_repeat	27917	NM_153526	231070	Mm.30221	NM_153526	ENSMUSG00000045294	Insig1	1810013C12Rik|Insig-1	insulin induced gene 1	protein-coding
chr18	24258907	24259428	intron (NM_001361200, intron 5 of 12)	intron (NM_001361200, intron 5 of 12)	53173	NM_001160404	14423	Mm.30249	NM_013814	ENSMUSG00000000420	Galnt1	-	polypeptide N-acetylgalactosaminyltransferase 1	protein-coding
chr13	3372708	3373620	Intergenic	Intergenic	-105139	NR_015522	76937	Mm.487240	NR_015522	ENSMUSG00000097709	2810429I04Rik	AI256682	RIKEN cDNA 2810429I04 gene	ncRNA
chr6	3182475	3183973	Intergenic	Intergenic	-105295	NR_036696	667335	Mm.380219	NR_036696	ENSMUSG00000106779	Gm8579	EG667335	spermatogenesis associated glutamate (E)-rich protein 4a pseudogene	pseudo
chr6	56714567	56715207	promoter-TSS (NM_030235)	promoter-TSS (NM_030235)	-18	NM_030235	78937	Mm.105343	NM_030235	ENSMUSG00000029787	Avl9	5830411G16Rik|D730049P16Rik|mKIAA0241	AVL9 cell migration associated	protein-coding
chr17	51068529	51068938	intron (NM_028162, intron 2 of 21)	(CACAC)n|Simple_repeat|Simple_repeat	90645	NM_001285993	72238	Mm.120650	NM_028162	ENSMUSG00000023923	Tbc1d5	1600014N05Rik	TBC1 domain family, member 5	protein-coding
chr9	95425851	95426160	Intergenic	(CCCTAA)n|Simple_repeat|Simple_repeat	-18735	NM_018763	54371	Mm.212446	NM_018763	ENSMUSG00000033350	Chst2	AI428561|AW121776|C130041E03Rik|Chts2|GST-2|GlcNAc6ST|Gn6st	carbohydrate sulfotransferase 2	protein-coding
chr15	88931016	88931239	intron (NM_001357736, intron 7 of 11)	intron (NM_001357736, intron 7 of 11)	23291	NM_001357736	239591	Mm.86807	NM_172818	ENSMUSG00000022388	Ttll8	1700019P01Rik|4933401B17	tubulin tyrosine ligase-like family, member 8	protein-coding
chr13	74528598	74530791	Intergenic	(CACAG)n|Simple_repeat|Simple_repeat	-35744	NM_146231	235956		NM_146231	ENSMUSG00000069208	Zfp825	-	zinc finger protein 825	protein-coding
chrX	148304711	148305026	intron (NM_001122734, intron 4 of 6).4	intron (NM_001122734, intron 4 of 6).4	-9662	NM_001122734	100039934	Mm.474426	NM_001122734	ENSMUSG00000095621	Gm15085	-	predicted gene 15085	protein-coding
chr10	122096723	122097807	promoter-TSS (NM_153059)	promoter-TSS (NM_153059)	-95	NM_001364706	216395	Mm.236764	NM_153059	ENSMUSG00000034620	Rxylt1	6330415D21Rik|Tmem5	ribitol xylosyltransferase 1	protein-coding
chrX	143482936	143483179	Intergenic	SYNREP_MM|Satellite|Satellite	-35534	NM_001195048	18481	Mm.40035	NM_008778	ENSMUSG00000031284	Pak3	PAK-3|Pak65alpha|Pak65beta|Stk4	p21 (RAC1) activated kinase 3	protein-coding
chr13	4778425	4778704	Intergenic	Intergenic	-169400	NM_018859	56043	Mm.251908	NM_018859	ENSMUSG00000045410	Akr1e1	1810061I10Rik|Akr1e2	aldo-keto reductase family 1, member E1	protein-coding
chr15	96787937	96788312	Intergenic	ORR1A4|LTR|ERVL-MaLR	-88396	NM_175121	67760	Mm.46754	NM_175121	ENSMUSG00000022462	Slc38a2	5033402L14Rik|AI316867|ATA2|SAT2|mKIAA1382	solute carrier family 38, member 2	protein-coding
chr19	53142204	53142814	promoter-TSS (NM_001277100)	promoter-TSS (NM_001277100)	-247	NM_001277100	27360	Mm.426080	NM_013758	ENSMUSG00000025026	Add3	AI463285|R75380	adducin 3 (gamma)	protein-coding
chrY	4036562	4036805	Intergenic	(CCCTAA)n|Simple_repeat|Simple_repeat	265010	NM_001270516	100862398	Mm.4711	NM_001270516	ENSMUSG00000095948	Gm21708	Rbm|Rbmy1a1	predicted gene, 21708	protein-coding
chr1	123303720	123303957	Intergenic	(CAGAC)n|Simple_repeat|Simple_repeat	741721	NM_199021	269109	Mm.417716	NM_199021	ENSMUSG00000036815	Dpp10	6430601K09Rik|DPP X|Dprp3	dipeptidylpeptidase 10	protein-coding
chrX	147789442	147789730	Intergenic	Intergenic	-203407	NM_001122734	100039934	Mm.474426	NM_001122734	ENSMUSG00000095621	Gm15085	-	predicted gene 15085	protein-coding
chr14	69161931	69162532	Intergenic	(CCCTAA)n|Simple_repeat|Simple_repeat	-9571	NM_010920	18092	Mm.390691	NM_010920	ENSMUSG00000044186	Nkx2-6	AV044928|Nkx-2.6|Nkx2.6|Tix|tinman	NK2 homeobox 6	protein-coding
chr4	132288971	132289372	intron (NM_025579, intron 3 of 5)	intron (NM_025579, intron 3 of 5)	14185	NM_001081651	242681	Mm.331927	NM_001081651	ENSMUSG00000089687	Rab42	9530096D07Rik|Rab42-ps	RAB42, member RAS oncogene family	protein-coding
chr3	152557715	152558173	intron (NM_001081277, intron 6 of 13)	(CGGGG)n|Simple_repeat|Simple_repeat	-108969	NR_040386	99542	Mm.394921	NR_040386	ENSMUSG00000097745	AI115009	-	expressed sequence AI115009	ncRNA
chr1	13268442	13268690	intron (NM_008678, intron 2 of 22)	intron (NM_008678, intron 2 of 22)	103863	NM_001302702	17978	Mm.2537	NM_008678	ENSMUSG00000005886	Ncoa2	D1Ertd433e|GRIP-1|Grip1|KAT13C|NCoA-2|SRC-2|TIF2|bHLHe75	nuclear receptor coactivator 2	protein-coding
chr16	48398617	48399120	TTS (NR_015373)	TTS (NR_015373)	13548	NR_015373	433023	Mm.483302	NR_015373	ENSMUSG00000110573	Gm5485	EG433023	predicted gene 5485	ncRNA
chr1	152309435	152309792	Intergenic	CT-rich|Low_complexity|Low_complexity	77069	NM_025677	66637	Mm.379120	NM_025677	ENSMUSG00000014980	Tsen15	5730449L18Rik|AL023077|Sen15	tRNA splicing endonuclease subunit 15	protein-coding
chr8	60373624	60373932	Intergenic	ORR1B1|LTR|ERVL-MaLR	-132346	NM_011834	23923	Mm.35020	NM_011834	ENSMUSG00000057228	Aadat	AI875679|Aadt|KATII|Kat2|Kyat2|mKat-2	aminoadipate aminotransferase	protein-coding
chr6	87457285	87458048	TTS (NR_104483)	TTS (NR_104483)	28672	NM_009756	12154	Mm.483321	NM_009756	ENSMUSG00000030046	Bmp10	b2b2711Clo	bone morphogenetic protein 10	protein-coding
chr6	47739581	47740215	Intergenic	4.5SRNA|scRNA|scRNA	4333	NR_002841	19799		NR_002841		Rn4.5s	-	4.5S RNA	rRNA
chr4	149528243	149528870	intron (NM_023465, intron 1 of 4)	intron (NM_023465, intron 1 of 4)	-9307	NR_049189	100885828		NR_049189	ENSMUSG00000093403	Mir5616	Gm25191|mir-5616|mmu-mir-5616	microRNA 5616	ncRNA
chr7	35961531	35961865	Intergenic	ORR1B1|LTR|ERVL-MaLR	-158709	NM_177739	668501	Mm.286296	NM_177739	ENSMUSG00000044452	Zfp507	1810022O10Rik|A230056M16Rik|AL024009|AU021817|BB105092|Gm480|Znf507|mKIAA1084	zinc finger protein 507	protein-coding
chr16	30717462	30718964	Intergenic	(GGCTG)n|Simple_repeat|Simple_repeat	118490	NM_177632	224093	Mm.28244	NM_177632	ENSMUSG00000046546	Fam43a	Tuf1	family with sequence similarity 43, member A	protein-coding
chr9	3004556	3004771	Intergenic	GSAT_MM|Satellite|Satellite	34080	NR_039546	100628572		NR_039546	ENSMUSG00000106183	Mir101c	mir-101c|mmu-mir-101c	microRNA 101c	ncRNA
chr4	130241300	130241832	Intergenic	C-rich|Low_complexity|Low_complexity	-19271	NM_001034872	332942	Mm.387701	NM_001034872	ENSMUSG00000023120	Ldc1	Gm853	leucine decarboxylase 1	protein-coding
chr11	32008124	32008536	intron (NM_001290680, intron 2 of 4)	intron (NM_001290680, intron 2 of 4)	7053	NM_001290681	18197	Mm.3304	NM_008741	ENSMUSG00000020297	Nsg2	P19	neuron specific gene family member 2	protein-coding
chr4	149757038	149757396	intron (NM_027460, intron 2 of 6)	intron (NM_027460, intron 2 of 6)	17050	NM_027460	70556	Mm.41877	NM_027460	ENSMUSG00000028982	Slc25a33	5730438N18Rik|Pnc1	solute carrier family 25, member 33	protein-coding
chr9	83688168	83688710	Intergenic	(CTAGGG)n|Simple_repeat|Simple_repeat	-3036	NR_046066	100039222	Mm.405596	NR_046066	ENSMUSG00000100155	Gm2109	-	predicted gene 2109	ncRNA
chr2	118388266	118389011	promoter-TSS (NM_013719)	promoter-TSS (NM_013719)	21	NM_013719	27103	Mm.217616	NM_013719	ENSMUSG00000005102	Eif2ak4	2610011M03|GCN2|MGCN2	eukaryotic translation initiation factor 2 alpha kinase 4	protein-coding
chr10	88717403	88717924	Intergenic	RMER17C|LTR|ERVK	13438	NM_001037166	237433	Mm.478763	NM_001037166		Gm4925	EG237433	predicted gene 4925	protein-coding
chr2	151610759	151611179	intron (NM_198214, intron 2 of 5)	(CTAGG)n|Simple_repeat|Simple_repeat	21624	NM_001291076	241727	Mm.39312	NM_198214	ENSMUSG00000027457	Snph	6430515A01|AW045671|AW556958|AW743098|mKIAA0374	syntaphilin	protein-coding
chr17	67741329	67741619	intron (NM_008480, intron 5 of 62)	(CCCTAA)n|Simple_repeat|Simple_repeat	44209	NM_008480	16772	Mm.303386	NM_008480	ENSMUSG00000032796	Lama1	AA408497|Lama	laminin, alpha 1	protein-coding
chr16	45352938	45353153	Intergenic	(TCTG)n|Simple_repeat|Simple_repeat	56008	NM_001358443	17470	Mm.245851	NM_010818	ENSMUSG00000022661	Cd200	Mox2|OX2	CD200 antigen	protein-coding
chr16	3974437	3974890	intron (NM_001081280, intron 1 of 17)	intron (NM_001081280, intron 1 of 17)	1969	NM_175547	268857	Mm.215994	NM_175547	ENSMUSG00000049871	Nlrc3	CLR16.2|D230007K08Rik|mFLJ00348	NLR family, CARD domain containing 3	protein-coding
chr9	3018381	3018664	Intergenic	GSAT_MM|Satellite|Satellite	20221	NR_039546	100628572		NR_039546	ENSMUSG00000106183	Mir101c	mir-101c|mmu-mir-101c	microRNA 101c	ncRNA
chr3	38484644	38485335	promoter-TSS (NM_001167883)	promoter-TSS (NM_001167883)	-173	NM_001167883	99696	Mm.290937	NM_001033198	ENSMUSG00000044864	Ankrd50	AI662170|E430012K20Rik|mKIAA1223|mKIAA3019	ankyrin repeat domain 50	protein-coding
chr2	173659102	173659855	promoter-TSS (NR_027957)	promoter-TSS (NR_027957)	61	NR_027957	100043911	Mm.260590	NM_001033179	ENSMUSG00000055897	Ppp4r1l-ps	1700007P14Rik|5830403E09Rik|C030010B13Rik|Ppp4r1l	protein phosphatase 4, regulatory subunit 1-like, pseudogene	pseudo
chr2	59252895	59253174	intron (NM_001362994, intron 3 of 22)	intron (NM_001362994, intron 3 of 22)	91165	NM_001362996	227937	Mm.260938	NM_026361	ENSMUSG00000026991	Pkp4	5031422I09Rik|9430019K17Rik|Armrp|p0071	plakophilin 4	protein-coding
chr7	128610964	128611448	promoter-TSS (NM_178641)	promoter-TSS (NM_178641)	-159	NM_178641	101490	Mm.490344	NM_178641	ENSMUSG00000042105	Inpp5f	5830435P03Rik|AI115354|AW561896|SAC2|cI-27|hSAC2|mKIAA0966	inositol polyphosphate-5-phosphatase F	protein-coding
chr13	47043111	47043569	promoter-TSS (NM_016785)	promoter-TSS (NM_016785)	-123	NM_016785	22017	Mm.10169	NM_016785	ENSMUSG00000021376	Tpmt	AW106912	thiopurine methyltransferase	protein-coding
chr5	106368536	106368827	Intergenic	Intergenic	47341	NR_136913	102635633	Mm.383511	NR_136913	ENSMUSG00000105508	Gm32921	-	predicted gene, 32921	ncRNA
chr3	152502602	152503426	intron (NM_001081277, intron 9 of 13)	intron (NM_001081277, intron 9 of 13)	106330	NM_001287139	108946	Mm.379292	NM_198416	ENSMUSG00000039068	Zzz3	3110065C23Rik|6430567E01Rik|AA408566|AI481057|AW556059|R75514	zinc finger, ZZ domain containing 3	protein-coding
chr1	69456717	69456917	Intergenic	(TTAGGG)n|Simple_repeat|Simple_repeat	229143	NM_011770	22779	Mm.106343	NM_011770	ENSMUSG00000025997	Ikzf2	A730095J18Rik|Helios|Zfpn1a2|Znfn1a2	IKAROS family zinc finger 2	protein-coding
chr10	58322988	58323871	promoter-TSS (NM_026148)	promoter-TSS (NM_026148)	-118	NM_026148	110829	Mm.57734	NM_026148	ENSMUSG00000019920	Lims1	2310016J22Rik|4921524A02Rik|AI507642|AU021743|AW551584|C430041B13Rik|Lims1l|PINCH|PINCH1	LIM and senescent cell antigen-like domains 1	protein-coding
chr17	5093114	5093804	intron (NM_001085355, intron 2 of 19)	intron (NM_001085355, intron 2 of 19)	98385	NM_001085355	239985	Mm.133401	NM_001085355	ENSMUSG00000069729	Arid1b	8030481M12|9330189K18Rik|AI836955|Ardi1b|B230217J03Rik|BAF250B|mKIAA1235	AT rich interactive domain 1B (SWI-like)	protein-coding
chr7	105399933	105400649	promoter-TSS (NM_001242365)	promoter-TSS (NM_001242365)	-237	NM_199009	74349	Mm.30254	NM_199009	ENSMUSG00000044465	Fam160a2	4632419K20Rik|6530415H11Rik|FHIP	family with sequence similarity 160, member A2	protein-coding
chr9	3002019	3002316	Intergenic	GSAT_MM|Satellite|Satellite	36576	NR_039546	100628572		NR_039546	ENSMUSG00000106183	Mir101c	mir-101c|mmu-mir-101c	microRNA 101c	ncRNA
chr5	117125686	117126280	intron (NM_001199685, intron 1 of 20)	intron (NM_001199685, intron 1 of 20)	5854	NM_001199685	330177	Mm.24343	NM_183306	ENSMUSG00000061288	Taok3	2900006A08Rik|A130052D22|A430105I05Rik	TAO kinase 3	protein-coding
chr14	19415738	19415995	Intergenic	GSAT_MM|Satellite|Satellite	186721	NM_001024706	432825	Mm.327147	NM_001024706	ENSMUSG00000095024	Gm5458	EG432825	predicted gene 5458	protein-coding
chr3	5860370	5860819	Intergenic	LSU-rRNA_Hsa|rRNA|rRNA	-284346	NM_008994	19302	Mm.132336	NM_008994	ENSMUSG00000040374	Pex2	D3Ertd138e|PAF-1|PMP35|Pxmp3	peroxisomal biogenesis factor 2	protein-coding
chr15	7998857	7999157	intron (NM_001081402, intron 9 of 17)	intron (NM_001081402, intron 9 of 17)	100202	NM_001081402	545085	Mm.321312	NM_001081402	ENSMUSG00000039828	Wdr70	4833422F06Rik	WD repeat domain 70	protein-coding
chr2	172345283	172345819	promoter-TSS (NM_025912)	promoter-TSS (NM_025912)	-26	NM_025912	67017	Mm.30013	NM_025912	ENSMUSG00000027495	Fam210b	2010011I20Rik|AI430961|AV108736	family with sequence similarity 210, member B	protein-coding
chr2	175109730	175110391	Intergenic	Intergenic	-42291	NM_001085546	664987		NM_001085546	ENSMUSG00000078905	Gm14393	-	predicted gene 14393	protein-coding
chr11	109611382	109611962	promoter-TSS (NM_145940)	promoter-TSS (NM_145940)	-283	NM_145940	52639	Mm.35817	NM_145940	ENSMUSG00000041895	Wipi1	4930533H01Rik|AW411817|D11Ertd498e	WD repeat domain, phosphoinositide interacting 1	protein-coding
chr9	56041633	56042342	5' UTR (NM_001278274, exon 1 of 2)	5' UTR (NM_001278274, exon 1 of 2)	142	NM_011992	26611	Mm.1782	NM_011992	ENSMUSG00000032320	Rcn2	AA408742|Tcbp49	reticulocalbin 2	protein-coding
chr10	112743900	112744258	intron (NR_040579, intron 2 of 6)	ORR1A3|LTR|ERVL-MaLR	17153	NR_040579	69355	Mm.84337	NR_040579	ENSMUSG00000100314	1700010J16Rik	-	RIKEN cDNA 1700010J16 gene	ncRNA
chr2	177329511	177330255	Intergenic	Intergenic	-134859	NM_001177568	628308	Mm.460436	NM_001177568	ENSMUSG00000078866	Zfp970	Gm14420	zinc finger protein 970	protein-coding
chr6	135826693	135827323	intron (NM_001363750, intron 6 of 14)	intron (NM_001363750, intron 6 of 14)	168095	NR_126088	75024	Mm.399147	NR_126088	ENSMUSG00000107396	4930425L21Rik	4930473P14Rik	RIKEN cDNA 4930425L21 gene	ncRNA
chr6	29747830	29748663	intron (NM_176996, intron 1 of 11)	(CTGTG)n|Simple_repeat|Simple_repeat	12749	NM_176996	319757	Mm.29279	NM_176996	ENSMUSG00000001761	Smo	E130215L21Rik|Smoh|bnb|smoothened	smoothened, frizzled class receptor	protein-coding
chr18	56925232	56925996	promoter-TSS (NM_177115)	promoter-TSS (NM_177115)	-66	NM_177115	320253	Mm.312623	NM_177115	ENSMUSG00000032656	2025-03-03	6330411I15Rik|A530081L18Rik|AI843639|MARCH-III	membrane-associated ring finger (C3HC4) 3	protein-coding
chrX	112370778	112371203	intron (NM_026565, intron 8 of 8)	intron (NM_026565, intron 8 of 8)	35789	NM_028655	73809	Mm.50508	NM_028655	ENSMUSG00000025527	Satl1	4930404K22Rik	spermidine/spermine N1-acetyl transferase-like 1	protein-coding
chr3	75556695	75557747	promoter-TSS (NM_019745)	promoter-TSS (NM_019745)	-272	NM_001357514	20713	Mm.41560	NM_009250	ENSMUSG00000027834	Serpini1	AI837402|Ns|PI-12|PI12|Spi17	serine (or cysteine) peptidase inhibitor, clade I, member 1	protein-coding
chr7	35333722	35334310	promoter-TSS (NM_027897)	promoter-TSS (NM_027897)	-221	NM_027897	52428	Mm.286600	NM_027897	ENSMUSG00000030494	Rhpn2	1300002E07Rik|AA536890|C85860|D7Ertd784e	rhophilin, Rho GTPase binding protein 2	protein-coding
chr6	72921175	72921668	Intergenic	ORR1D1|LTR|ERVL-MaLR	-21442	NM_019715	74287	Mm.29194	NM_019715	ENSMUSG00000055239	Kcmf1	1700094M07Rik|Debt91|Pmcf	potassium channel modulatory factor 1	protein-coding
chr14	87264286	87264993	Intergenic	Intergenic	-123415	NM_019670	56419	Mm.440585	NM_019670	ENSMUSG00000022021	Diaph3	4930417P13Rik|Dia2|Diap3|Drf3|p134MDia2	diaphanous related formin 3	protein-coding
chr16	50030463	50030755	intron (NR_045935, intron 2 of 3)	intron (NR_045935, intron 2 of 3)	42243	NR_045935	224180	Mm.146439	NM_175010		Gm4827	B130050K08|EG224180	predicted gene 4827	ncRNA
chr15	93467966	93469244	intron (NM_175363, intron 8 of 8)	intron (NM_175363, intron 8 of 8)	50915	NM_001364846	106042	Mm.150314	NM_001033217	ENSMUSG00000036158	Prickle1	1110058P22Rik|AW215793|Prickle|b2b019Clo|mpk1	prickle planar cell polarity protein 1	protein-coding
chr5	104661996	104662568	Intergenic	Intergenic	90610	NM_001346672	69623	Mm.69919	NM_027142		Zfp33b	2310012P17Rik	zinc finger protein 33B	protein-coding
chr1	14496414	14496977	Intergenic	CT-rich|Low_complexity|Low_complexity	-186496	NM_001252192	14048	Mm.250185	NM_010164	ENSMUSG00000025932	Eya1	bor	EYA transcriptional coactivator and phosphatase 1	protein-coding
chr5	8820422	8820833	intron (NM_011075, intron 8 of 27)	intron (NM_011075, intron 8 of 27)	-22104	NR_152133	330031	Mm.389059	NR_152132		Gm5106	A230021K14|EG330031	predicted gene 5106	ncRNA
chr5	131623200	131623714	intron (NM_001363480, intron 5 of 19)	ZP3AR|Satellite|Satellite	-208739	NR_152164	545809	Mm.357553	NR_152164	ENSMUSG00000105387	Gm29681	Gm42590	predicted gene, 29681	ncRNA
chr18	40308049	40308335	intron (NM_026135, intron 2 of 2)	intron (NM_026135, intron 2 of 2)	51193	NM_001371039
chr6	47762958	47763616	Intergenic	4.5SRNA|scRNA|scRNA	-10362	NR_002841	19799		NR_002841		Rn4.5s	-	4.5S RNA	rRNA
chr6	145746131	145746772	promoter-TSS (NM_027760)	promoter-TSS (NM_027760)	-336	NM_027760	71323	Mm.158669	NM_027760	ENSMUSG00000030259	Rassf8	5133400D11Rik|AA815821|AW123240|Hoj1|mHoj-1	Ras association (RalGDS/AF-6) domain family (N-terminal) member 8	protein-coding
chr14	118511613	118512125	intron (NM_001033336, intron 26 of 30)	intron (NM_001033336, intron 26 of 30)	80603	NR_105815	102465208		NR_105815	ENSMUSG00000098433	Mir6391	Gm27914|mmu-mir-6391	microRNA 6391	ncRNA
chr11	23497933	23498380	promoter-TSS (NM_172391)	promoter-TSS (NM_172391)	-117	NM_001290654	268390	Mm.13148	NM_172391	ENSMUSG00000020288	Ahsa2	-	AHA1, activator of heat shock protein ATPase 2	protein-coding
chr13	66588712	66589547	Intergenic	Intergenic	-148011	NM_001290196	76803	Mm.183391	NM_183119	ENSMUSG00000074832	2410141K09Rik	4930482J15Rik|Ayu21-35|Gt(pU21)35Imeg	RIKEN cDNA 2410141K09 gene	protein-coding
chr4	101271905	101272642	Intergenic	MTEb|LTR|ERVL-MaLR	-6991	NM_146145	16451	Mm.289657	NM_013567	ENSMUSG00000028530	Jak1	AA960307|BAP004|C130039L05Rik	Janus kinase 1	protein-coding
chr3	142191624	142191910	Intergenic	Intergenic	-22342	NM_001277217	12167	Mm.39089	NM_007560	ENSMUSG00000052430	Bmpr1b	AI385617|ALK-6|AV355320|Acvrlk6|Alk6|BMPR-1B|BMPR-IB|CFK-43a|SKR6	bone morphogenetic protein receptor, type 1B	protein-coding
chr6	50196842	50197308	intron (NM_001361247, intron 12 of 12)	CpG	64694	NM_018769	54722	Mm.248361	NM_018769	ENSMUSG00000029821	Gsdme	2310037D07Rik|4932441K13Rik|Dfna5|Dfna5h|EG14210|Fin15	gasdermin E	protein-coding
chr13	119598960	119599168	intron (NM_001370626, intron 2 of 2)	intron (NM_001370626, intron 2 of 2)	-24755	NM_020279	56838	Mm.143745	NM_020279	ENSMUSG00000074715	Ccl28	CCK1|MEC|Scya28	chemokine (C-C motif) ligand 28	protein-coding
chr9	111294870	111295415	Intergenic	Lx5b|LINE|L1	-16597	NM_001164659	320429	Mm.270754	NM_001164659	ENSMUSG00000062296	Trank1	A230061D21Rik|C030048J01Rik|Gm187|Lba1	tetratricopeptide repeat and ankyrin repeat containing 1	protein-coding
chr14	103677105	103678135	intron (NM_198014, intron 2 of 6)	intron (NM_198014, intron 2 of 6)	21812	NR_045148	70898	Mm.27548	NR_045148	ENSMUSG00000089707	Slain1os	4921525B02Rik	SLAIN motif family, member 1, opposite strand	ncRNA
chr6	47777894	47778231	Intergenic	Intergenic	-25137	NR_002841	19799		NR_002841		Rn4.5s	-	4.5S RNA	rRNA
chr13	4771447	4771838	Intergenic	Intergenic	-162478	NM_018859	56043	Mm.251908	NM_018859	ENSMUSG00000045410	Akr1e1	1810061I10Rik|Akr1e2	aldo-keto reductase family 1, member E1	protein-coding
chr3	80866728	80867275	intron (NM_001281969, intron 4 of 9)	intron (NM_001281969, intron 4 of 9)	45117	NM_001345996	14658	Mm.275639	NM_010298	ENSMUSG00000028020	Glrb	AI853901|Glyrb|spa|spastic	glycine receptor, beta subunit	protein-coding
chr18	65430505	65431072	promoter-TSS (NM_172833)	promoter-TSS (NM_172833)	-202	NM_172833	240354	Mm.132613	NM_172833	ENSMUSG00000032688	Malt1	A630046N12|D430033E09Rik|Pcasp1	MALT1 paracaspase	protein-coding
chr7	44304989	44305761	intron (NM_009131, intron 3 of 3)	intron (NM_009131, intron 3 of 3)	1584	NM_009131	20256	Mm.20428	NM_009131	ENSMUSG00000004473	Clec11a	AW457320|Clecsf3|Scgf	C-type lectin domain family 11, member a	protein-coding
chr5	134006691	134007721	Intergenic	Intergenic	-92542	NM_030719	80909	Mm.45218	NM_030719	ENSMUSG00000015944	Castor2	7530428J21Rik|AW742413|Gats|Gatsl1|Gatsl2	cytosolic arginine sensor for mTORC1 subunit 2	protein-coding
chr6	116242101	116242370	intron (NM_026585, intron 20 of 30)	intron (NM_026585, intron 20 of 30)	-21984	NM_001290338	67492	Mm.272772	NM_001081317	ENSMUSG00000042213	Zfand4	Anubl1	zinc finger, AN1-type domain 4	protein-coding
chr2	73386144	73386845	promoter-TSS (NM_001190297)	promoter-TSS (NM_001190297)	-14	NM_001276444	68526	Mm.451014	NM_001080707	ENSMUSG00000041762	Gpr155	1110017O10Rik|DEPDC3|F730029F15Rik|PGR22	G protein-coupled receptor 155	protein-coding
chr9	122294388	122294985	promoter-TSS (NM_001271873)	promoter-TSS (NM_001271873)	-263	NM_001271873	102566	Mm.87676	NM_133979	ENSMUSG00000037949	Ano10	AI604832|Tmem16k	anoctamin 10	protein-coding
chrX	134371560	134371958	Intergenic	Intergenic	-33021	NM_010078	13497	Mm.121662	NM_010078	ENSMUSG00000000223	Drp2	AW495265|DRP-2	dystrophin related protein 2	protein-coding
chr6	52962161	52962839	intron (NM_173406, intron 1 of 4)	intron (NM_173406, intron 1 of 4)	-52880	NM_001168277	231986	Mm.386865	NM_173406	ENSMUSG00000063568	Jazf1	AI591476|C820002C15|Jaz1|Tip27	JAZF zinc finger 1	protein-coding
chr11	62076523	62077234	promoter-TSS (NM_001029936)	promoter-TSS (NM_001029936)	-146	NM_001029936	432572	Mm.438022	NM_001029936	ENSMUSG00000042331	Specc1	2810012G08Rik|B230396K10Rik|Cytsb	sperm antigen with calponin homology and coiled-coil domains 1	protein-coding
chr3	54923165	54923594	Intergenic	Intergenic	-7492	NM_177854	329641	Mm.51187	NM_177854	ENSMUSG00000056306	Sertm1	6030405A18Rik	serine rich and transmembrane domain containing 1	protein-coding
chr10	111962250	111962729	Intergenic	Intergenic	-10206	NM_178610	52705	Mm.34606	NM_178610	ENSMUSG00000063334	Krr1	2610511F02Rik|AI255219|AI428520|D10Ertd773e|Hrb2	KRR1, small subunit (SSU) processome component, homolog (yeast)	protein-coding
chr19	4510110	4510628	promoter-TSS (NM_001162946)	promoter-TSS (NM_001162946)	-103	NM_001162946	18563	Mm.1845	NM_008797	ENSMUSG00000024892	Pcx	Pc|Pcb	pyruvate carboxylase	protein-coding
chr11	109011565	109012145	Intergenic	LSU-rRNA_Hsa|rRNA|rRNA	91506	NM_015732	12006	Mm.71710	NM_015732	ENSMUSG00000000142	Axin2	Axi1|Axil|Conductin	axin 2	protein-coding
chr10	81014841	81015180	promoter-TSS (NM_010319)	promoter-TSS (NM_010319)	-85	NM_010319	14708	Mm.222496	NM_010319	ENSMUSG00000048240	Gng7	AI840417	guanine nucleotide binding protein (G protein), gamma 7	protein-coding
chr2	136531996	136532465	promoter-TSS (NM_175667)	promoter-TSS (NM_175667)	-91	NM_175667	319196	Mm.477841	NM_175667	ENSMUSG00000074771	Ankef1	AV276460|Ankrd5	ankyrin repeat and EF-hand domain containing 1	protein-coding
chr9	37208011	37208473	promoter-TSS (NM_001310096)	promoter-TSS (NM_001310096)	19	NM_025464	66279	Mm.41451	NM_025464	ENSMUSG00000032121	Tmem218	1810021J13Rik|AV004931	transmembrane protein 218	protein-coding
chrX	129056489	129056744	intron (NR_045441, intron 1 of 3)	(CCCTAA)n|Simple_repeat|Simple_repeat	5092	NR_045441	75274	Mm.108718	NR_045441	ENSMUSG00000086244	4930558G05Rik	-	RIKEN cDNA 4930558G05 gene	ncRNA
chr17	64616610	64617270	intron (NM_008549, intron 1 of 21)	intron (NM_008549, intron 1 of 21)	15291	NM_008549	17158	Mm.2433	NM_008549	ENSMUSG00000024085	Man2a1	Mana-2|Mana2|Map-2	mannosidase 2, alpha 1	protein-coding
chr1	32172267	32173161	promoter-TSS (NM_133235)	promoter-TSS (NM_133235)	-8	NM_133235	170771	Mm.336594	NM_133235	ENSMUSG00000026058	Khdrbs2	6330586C16Rik|Slim1|Slm-1|Slm1|TG-RP135|Tg(LRRK2*R1441G)135Cjli|mSLM-1	KH domain containing, RNA binding, signal transduction associated 2	protein-coding
chr10	123426180	123426707	intron (NM_001252387, intron 1 of 4)	intron (NM_001252387, intron 1 of 4)	162367	NR_153334	268354	Mm.51939	NM_182807	ENSMUSG00000044071	Tafa2	6330575M02|FAM19A2 TAFA-2|Fam19a2|Sam2|Tafa-2	TAFA chemokine like family member 2	protein-coding
chr8	46470624	46471158	promoter-TSS (NM_007981)	promoter-TSS (NM_007981)	-146	NM_007981	14081	Mm.210323	NM_007981	ENSMUSG00000018796	Acsl1	Acas|Acas1|Acs|FACS|Facl2|LACS 1|LACS1	acyl-CoA synthetase long-chain family member 1	protein-coding
chr5	77660721	77661159	Intergenic	(CAGCC)n|Simple_repeat|Simple_repeat	195452	NR_131050	69370	Mm.426881	NR_131050	ENSMUSG00000107232	1700017L05Rik	-	RIKEN cDNA 1700017L05 gene	ncRNA
chr9	3004083	3004266	Intergenic	GSAT_MM|Satellite|Satellite	34569	NR_039546	100628572		NR_039546	ENSMUSG00000106183	Mir101c	mir-101c|mmu-mir-101c	microRNA 101c	ncRNA
chr13	66145004	66145616	Intergenic	Intergenic	31857	NM_001177832	628709	Mm.390595	NM_001177832	ENSMUSG00000095909	Gm10324	-	predicted gene 10324	protein-coding
chr7	109588517	109588959	intron (NM_001001326, intron 1 of 19)	(CAGCC)n|Simple_repeat|Simple_repeat	27830	NR_037617	76954	Mm.252009	NM_029811	ENSMUSG00000031024	St5	2010004M01Rik|2610305K15Rik	suppression of tumorigenicity 5	protein-coding
chr1	12657482	12657864	Intergenic	Intergenic	-9890	NR_045297	329096	Mm.417782	NR_045297	ENSMUSG00000097171	Gm17644	4932411L15	predicted gene, 17644	ncRNA
chr18	66002591	66002999	promoter-TSS (NM_001172062)	promoter-TSS (NM_001172062)	-160	NM_001172062	70361	Mm.290857	NM_027400	ENSMUSG00000041891	Lman1	2610020P13Rik|AI326273|AU043785|C730041J05|ERGIC53|F5F8D|MCFD1|MR60|P58|gp58	lectin, mannose-binding, 1	protein-coding
chr11	20631668	20632143	promoter-TSS (NM_001038625)	promoter-TSS (NM_001038625)	-72	NM_001038625	58172	Mm.339676	NM_021372	ENSMUSG00000049800	Sertad2	AB041541|AU021878|Kiaa0127|MNCb-1504|SEI-2|Sei2|TRIP-Br2|mKIAA0127	SERTA domain containing 2	protein-coding
chr6	135406531	135406926	Intergenic	(CTGTG)n|Simple_repeat|Simple_repeat	39235	NM_001288627	13730	Mm.182785	NM_010128	ENSMUSG00000030208	Emp1	I-8-09|TMP	epithelial membrane protein 1	protein-coding
chr9	3037829	3038250	TTS (NR_039546)	TTS (NR_039546)	704	NR_039546	100628572		NR_039546	ENSMUSG00000106183	Mir101c	mir-101c|mmu-mir-101c	microRNA 101c	ncRNA
chr19	55528466	55529145	intron (NM_001360431, intron 8 of 8)	intron (NM_001360431, intron 8 of 8)	173399	NR_045318	77594	Mm.329924	NR_045318	ENSMUSG00000097632	4930552P12Rik	-	RIKEN cDNA 4930552P12 gene	ncRNA
chr9	53706005	53706690	promoter-TSS (NM_175562)	promoter-TSS (NM_175562)	-115	NM_175562	270160	Mm.290285	NM_175562	ENSMUSG00000055069	Rab39	C230094F14Rik|Rab39a	RAB39, member RAS oncogene family	protein-coding
chr2	103073299	103073962	promoter-TSS (NM_001355473)	promoter-TSS (NM_001355473)	-45	NM_019735	56369	Mm.24772	NM_019735	ENSMUSG00000010911	Apip	APIP2|CGI-29|Mmrp19	APAF1 interacting protein	protein-coding
chr2	7204131	7204374	intron (NM_001110231, intron 2 of 15)	intron (NM_001110231, intron 2 of 15)	-122950	NM_001110229	14007	Mm.398543	NM_010160	ENSMUSG00000002107	Celf2	B230218O03|B230345P09Rik|C88023|CELF-2|CUG-BP2|Cugbp2|D230046B21Rik|Etr-3|Napor|Napor-2|mETR-3	CUGBP, Elav-like family member 2	protein-coding
chrX	149088122	149088519	promoter-TSS (NM_011022).6	promoter-TSS (NM_011022).6	5	NM_011022	18422	Mm.420007	NM_011022	ENSMUSG00000094885	Ott	AV272316	ovary testis transcribed	protein-coding
chr1	195241461	195241876	Intergenic	CpG	-64949	NM_001368765	12902	Mm.235387	NM_007758	ENSMUSG00000026616	Cr2	C3DR|CD21|CD35|Cr-1|Cr-2|Cr1	complement receptor 2	protein-coding
chr13	58912486	58912998	intron (NM_001025074, intron 12 of 17)	C-rich|Low_complexity|Low_complexity	105045	NM_001025074	18212	Mm.130054	NM_008745	ENSMUSG00000055254	Ntrk2	GP145-TrkB/GP95-TrkB|Tkrb|trk-B|trkB	neurotrophic tyrosine kinase, receptor, type 2	protein-coding
chr14	42134524	42135077	Intergenic	Intergenic	-39523	NR_073362	73553	Mm.243777	NM_028570	ENSMUSG00000090462	1700091H14Rik	100041930|Gm3578	RIKEN cDNA 1700091H14 gene	ncRNA
chr11	3123804	3124217	promoter-TSS (NR_003517)	promoter-TSS (NR_003517)	8	NR_003517	236604	Mm.247625	NM_001004146		Pisd-ps1	-	phosphatidylserine decarboxylase, pseudogene 1	pseudo
chr5	52833695	52834325	promoter-TSS (NM_024213)	promoter-TSS (NM_024213)	-125	NM_024213	52206	Mm.272568	NM_024213	ENSMUSG00000029176	Anapc4	2610306D21Rik|APC4|D5Ertd249e	anaphase promoting complex subunit 4	protein-coding
chr9	104002046	104002755	promoter-TSS (NM_028721)	promoter-TSS (NM_028721)	-144	NM_172460	74025	Mm.479273	NM_028721	ENSMUSG00000032558	Nphp3	3632410F03Rik|AI550417|C230078J01|D330020E01Rik|pcy	nephronophthisis 3 (adolescent)	protein-coding
chr5	17468705	17469198	Intergenic	Lx2A1|LINE|L1	-7171	NM_027609	70935	Mm.332225	NM_027609	ENSMUSG00000058643	Speer4f1	4922502J04Rik|SPEER-4F|Speer4f	spermatogenesis associated glutamate (E)-rich protein 4F1	protein-coding
chr5	112276185	112276768	promoter-TSS (NM_009419)	promoter-TSS (NM_009419)	-269	NM_001326590	22022	Mm.250631	NM_009419	ENSMUSG00000029344	Tpst2	AI448750|D5Ucla3|Tango13b|grm|grt	protein-tyrosine sulfotransferase 2	protein-coding
chr13	112711807	112712125	intron (NM_178746, intron 10 of 14)	intron (NM_178746, intron 10 of 14)	51200	NM_178746	268706	Mm.40834	NM_175376	ENSMUSG00000047789	Slc38a9	4833412L08Rik|6720411P22Rik|9130023D20Rik|9430067K09Rik|A730092C09	solute carrier family 38, member 9	protein-coding
chr15	31175780	31176724	Intergenic	(CTCTG)n|Simple_repeat|Simple_repeat	-48133	NM_146057	223453	Mm.222867	NM_146057	ENSMUSG00000039168	Dap	4921531N22Rik|AI789753|AU040360	death-associated protein	protein-coding
chr2	145698962	145699180	Intergenic	(TATTG)n|Simple_repeat|Simple_repeat	-2124	NR_033220	408057	Mm.486711	NR_033220	ENSMUSG00000001768	BC039771	-	cDNA sequence BC039771	ncRNA
chrX	149772494	149773284	Intergenic	Intergenic	-11590	NM_001114400	434866	Mm.491025	NM_001114400	ENSMUSG00000096834	Gm15127	-	predicted gene 15127	protein-coding
chr7	6362369	6363232	promoter-TSS (NM_001112805)	promoter-TSS (NM_001112805)	-508	NM_001025163	330463	Mm.136456	NM_177888	ENSMUSG00000055150	Zfp78	A330079D15|KRAB12|Zfp77	zinc finger protein 78	protein-coding
chr7	83891739	83892617	5' UTR (NM_023403, exon 1 of 3)	5' UTR (NM_023403, exon 1 of 3)	178	NM_023403	67943	Mm.117365	NM_023403	ENSMUSG00000038503	Mesd	2210015O11Rik|AW537813|Mesdc2|mKIAA0081|mesd|msd	mesoderm development LRP chaperone	protein-coding
chr1	183299141	183299553	intron (NM_181732, intron 1 of 9)	RLTR33|LTR|ERVK	-2054	NM_001357242	71678	Mm.392270	NM_027861	ENSMUSG00000046836	Brox	0610010K06Rik	BRO1 domain and CAAX motif containing	protein-coding
chr7	139388517	139389139	promoter-TSS (NM_001127363)	promoter-TSS (NM_001127363)	-281	NM_001127363	212111	Mm.28308	NM_183144	ENSMUSG00000025477	Inpp5a	-	inositol polyphosphate-5-phosphatase A	protein-coding
chr18	67449088	67449616	promoter-TSS (NM_027130)	promoter-TSS (NM_027130)	-160	NM_027130	69597	Mm.426052	NM_027130	ENSMUSG00000024527	Afg3l2	2310036I02Rik|AW260507|Emv66|par	AFG3-like AAA ATPase 2	protein-coding
chr8	54724114	54724712	promoter-TSS (NM_001172152)	promoter-TSS (NM_001172152)	-45	NM_001172152	244484	Mm.95281	NM_028220	ENSMUSG00000039375	Wdr17	3010002I12Rik|B230207L18Rik	WD repeat domain 17	protein-coding
chr14	61556305	61557183	5' UTR (NM_001310603, exon 1 of 4)	5' UTR (NM_001310603, exon 1 of 4)	142	NM_025697	66674	Mm.282706	NM_025697	ENSMUSG00000021930	Spryd7	6330409N04Rik|Clld6	SPRY domain containing 7	protein-coding
chr7	118243638	118244233	promoter-TSS (NR_027879)	promoter-TSS (NR_027879)	28	NR_027879	67745	Mm.483404	NM_183267	ENSMUSG00000055159	4930583K01Rik	-	RIKEN cDNA 4930583K01 gene	ncRNA
chr3	53233397	53233955	intron (NM_175386, intron 3 of 3)	intron (NM_175386, intron 3 of 3)	192129	NM_175386	108927	Mm.118617	NM_175386	ENSMUSG00000048332	Lhfp	2810489O06Rik|AI194968|Lhfpl6	lipoma HMGIC fusion partner	protein-coding
chr6	137621278	137621716	intron (NM_007945, intron 1 of 21)	intron (NM_007945, intron 1 of 21)	27788	NM_007945	13860	Mm.235346	NM_007945	ENSMUSG00000015766	Eps8	AW261790	epidermal growth factor receptor pathway substrate 8	protein-coding
chr14	54492319	54492651	Intergenic	MTD|LTR|ERVL-MaLR	16385	NM_080726	140743	Mm.274727	NM_080726	ENSMUSG00000022176	Rem2	AW411893	rad and gem related GTP binding protein 2	protein-coding
chr16	42875191	42876042	promoter-TSS (NR_040521)	promoter-TSS (NR_040521)	-29	NR_040521	75722	Mm.243747	NR_040521	ENSMUSG00000075070	4932412D23Rik	Gm10809	RIKEN cDNA 4932412D23 gene	ncRNA
chr4	139574078	139574729	promoter-TSS (NM_001205173)	promoter-TSS (NM_001205173)	-317	NM_001205173	212632	Mm.30464	NM_183148	ENSMUSG00000041025	Iffo2	C79267	intermediate filament family orphan 2	protein-coding
chr9	115350763	115351028	Intergenic	(CCCTAA)n|Simple_repeat|Simple_repeat	14734	NR_040730	73856	Mm.399156	NR_040730		4930428G15Rik	-	RIKEN cDNA 4930428G15 gene	ncRNA
chr13	65897037	65897468	Intergenic	Intergenic	-216201	NM_001177832	628709	Mm.390595	NM_001177832	ENSMUSG00000095909	Gm10324	-	predicted gene 10324	protein-coding
chr14	20929024	20929447	promoter-TSS (NM_009502)	promoter-TSS (NM_009502)	-163	NM_009502	22330	Mm.279361	NM_009502	ENSMUSG00000021823	Vcl	9430097D22|AA571387|AI462105|AW545629	vinculin	protein-coding
chr4	150644917	150645174	intron (NM_001355737, intron 1 of 8)	(CTGTG)n|Simple_repeat|Simple_repeat	7129	NM_173774	242773	Mm.29280	NM_173774	ENSMUSG00000039838	Slc45a1	C230078B22|Dnb5	solute carrier family 45, member 1	protein-coding
chr9	3014035	3014379	Intergenic	GSAT_MM|Satellite|Satellite	24536	NR_039546	100628572		NR_039546	ENSMUSG00000106183	Mir101c	mir-101c|mmu-mir-101c	microRNA 101c	ncRNA
chr12	30578581	30579025	Intergenic	Intergenic	-5640	NM_172049	211986	Mm.34035	NM_172049	ENSMUSG00000043061	Tmem18	BC024093	transmembrane protein 18	protein-coding
chr7	99154985	99155579	intron (NM_026384, intron 7 of 7)	(CAGCC)n|Simple_repeat|Simple_repeat	-14138	NM_178635	78610	Mm.323072	NM_178635	ENSMUSG00000035354	Uvrag	9530039D02Rik|AI648770|BB124205|Uvrag1|Uvragl	UV radiation resistance associated gene	protein-coding
chr17	57031553	57032375	promoter-TSS (NM_010613)	promoter-TSS (NM_010613)	-457	NM_010613	16549	Mm.34296	NM_010613	ENSMUSG00000007670	Khsrp	6330409F21Rik|Fbp2|Fubp2|Ksrp	KH-type splicing regulatory protein	protein-coding
chr7	36455135	36455689	Intergenic	ZP3AR|Satellite|Satellite	-242706	NM_172298	243931	Mm.44141	NM_172298	ENSMUSG00000021217	Tshz3	A630038G13Rik|Tsh3|Zfp537|mKIAA1474|teashirt3	teashirt zinc finger family member 3	protein-coding
chr13	111725095	111725945	Intergenic	CpG	39342	NM_172593	218613	Mm.31012	NM_172593	ENSMUSG00000032727	Mier3	5730509D14|AU015422|D130064H19Rik	MIER family member 3	protein-coding
chr5	15535604	15536238	Intergenic	Lx2A1|LINE|L1	-6699	NM_001310449	100861755	Mm.382859	NM_001310449	ENSMUSG00000106445	Gm21190	-	predicted gene, 21190	protein-coding
chr19	17292572	17292861	Intergenic	Intergenic	46789	NM_001136484	14537	Mm.244825	NM_010265	ENSMUSG00000038843	Gcnt1	5630400D21Rik|B130048E03|C2 GlcNAcT|C2GNT|IGnT	glucosaminyl (N-acetyl) transferase 1, core 2	protein-coding
chr14	19419154	19419400	Intergenic	GSAT_MM|Satellite|Satellite	183310	NM_001024706	432825	Mm.327147	NM_001024706	ENSMUSG00000095024	Gm5458	EG432825	predicted gene 5458	protein-coding
chr13	66641973	66642707	Intergenic	Intergenic	-201222	NM_001290196	76803	Mm.183391	NM_183119	ENSMUSG00000074832	2410141K09Rik	4930482J15Rik|Ayu21-35|Gt(pU21)35Imeg	RIKEN cDNA 2410141K09 gene	protein-coding
chr5	14921380	14921910	Intergenic	Lx2A1|LINE|L1	-6756	NM_198666	381714	Mm.368256	NM_198666	ENSMUSG00000033219	Gm9758	-	predicted gene 9758	protein-coding
chr12	91848785	91849469	promoter-TSS (NM_011344)	promoter-TSS (NM_011344)	30	NM_001039089	20338	Mm.250605	NM_011344	ENSMUSG00000020964	Sel1l	AW493766|Sel1h|mKIAA4137	sel-1 suppressor of lin-12-like (C. elegans)	protein-coding
chr7	28436253	28436828	promoter-TSS (NM_001290550)	promoter-TSS (NM_001290550)	-349	NM_175021	233033	Mm.54120	NM_175021	ENSMUSG00000109336	Samd4b	BC042901	sterile alpha motif domain containing 4B	protein-coding
chr4	16163454	16164266	promoter-TSS (NR_045765)	promoter-TSS (NR_045765)	-217	NM_001329751	192656	Mm.112765	NM_138952	ENSMUSG00000041135	Ripk2	2210420D18Rik|CARD3|CARDIAK|CCK|D4Bwg0615e|RICK|RIP2	receptor (TNFRSF)-interacting serine-threonine kinase 2	protein-coding
chr9	3034808	3035247	Intergenic	GSAT_MM|Satellite|Satellite	3716	NR_039546	100628572		NR_039546	ENSMUSG00000106183	Mir101c	mir-101c|mmu-mir-101c	microRNA 101c	ncRNA
chr2	170257781	170258222	Intergenic	ORR1B1|LTR|ERVL-MaLR	-63948	NR_157067	100502923	Mm.44078	NR_157067	ENSMUSG00000097514	Gm17619	-	predicted gene, 17619	ncRNA
chr7	65273913	65274341	Intergenic	C-rich|Low_complexity|Low_complexity	97117	NM_009386	21872	Mm.4342	NM_009386	ENSMUSG00000030516	Tjp1	ZO1	tight junction protein 1	protein-coding
chr13	65414884	65415462	Intergenic	Intergenic	-66579	NM_001371118
chr7	65644484	65644989	promoter-TSS (NM_172310)	promoter-TSS (NM_172310)	-162	NM_172310	272396	Mm.35127	NM_172310	ENSMUSG00000030515	Tarsl2	A530046H20Rik	threonyl-tRNA synthetase-like 2	protein-coding
chr5	96862084	96862378	Intergenic	(CTGTG)n|Simple_repeat|Simple_repeat	-59041	NR_131152	666266	Mm.32442	NR_131152	ENSMUSG00000106357	Gm8013	EG666266	predicted gene 8013	ncRNA
chr9	97922961	97923333	intron (NM_022319, intron 1 of 17)	intron (NM_022319, intron 1 of 17)	-80273	NR_110443	66737	Mm.445908	NR_110443	ENSMUSG00000090255	4921534H16Rik	-	RIKEN cDNA 4921534H16 gene	ncRNA
chr7	140221252	140221446	intron (NM_172909, intron 2 of 13)	(CGAGG)n|Simple_repeat|Simple_repeat	3082	NM_172909	244233	Mm.19283	NM_172909	ENSMUSG00000025461	Cd163l1	B430307C05|E430002D04Rik|Scart1	CD163 molecule-like 1	protein-coding
chr5	116655727	116656222	Intergenic	Intergenic	-64157	NM_026886	68955	Mm.146779	NM_026886	ENSMUSG00000063919	Srrm4	1500001A10Rik|B230202K19Rik|bv|mKIAA1853|nSR100	serine/arginine repetitive matrix 4	protein-coding
chr9	115614792	115615127	Intergenic	MTE2b|LTR|ERVL-MaLR	233140	NR_130329	100316675		NR_130329	ENSMUSG00000080409	Mir467h	Mirn467h|mmu-mir-467h	microRNA 467h	ncRNA
chr13	62558257	62559077	promoter-TSS (NM_001162911)	promoter-TSS (NM_001162911)	-38	NM_175252	77117	Mm.440905	NM_175252	ENSMUSG00000074865	Zfp934	6720457D02Rik	zinc finger protein 934	protein-coding
chr2	62663983	62664642	promoter-TSS (NM_145523)	promoter-TSS (NM_145523)	-15	NM_145523	227960	Mm.219877	NM_145523	ENSMUSG00000026893	Gca	5133401E04Rik|AI573844	grancalcin	protein-coding
chr4	89040254	89040765	Intergenic	Intergenic	-9798	NR_033533	100040617	Mm.171720	NR_033533	ENSMUSG00000085183	Wincr1	Gm12603	WNT induced non-coding RNA 1	ncRNA
chr14	19585275	19585636	Intergenic	Intergenic	17132	NM_001024706	432825	Mm.327147	NM_001024706	ENSMUSG00000095024	Gm5458	EG432825	predicted gene 5458	protein-coding
chr3	153944353	153944873	promoter-TSS (NM_007382)	promoter-TSS (NM_007382)	30	NM_007382	11364	Mm.10530	NM_007382	ENSMUSG00000062908	Acadm	AU018656|MCAD	acyl-Coenzyme A dehydrogenase, medium chain	protein-coding
chr9	78175318	78175609	promoter-TSS (NR_040401)	promoter-TSS (NR_040401)	-451	NR_040401	320295	Mm.131285	NR_040401	ENSMUSG00000097574	C920006O11Rik	-	RIKEN cDNA C920006O11 gene	ncRNA
chrX	148314355	148314962	intron (NM_001122734, intron 1 of 7)	intron (NM_001122734, intron 1 of 7)	128	NM_011022	18422	Mm.420007	NM_011022	ENSMUSG00000094885	Ott	AV272316	ovary testis transcribed	protein-coding
chrX	148170923	148171334	Intergenic	Intergenic	-9596	NM_001081648	434864	Mm.484933	NM_001081648	ENSMUSG00000072930	Gm15107	Ott-like	predicted gene 15107	protein-coding
chr6	47685083	47685516	promoter-TSS (NR_002841)	promoter-TSS (NR_002841)	77	NR_002841	19799		NR_002841		Rn4.5s	-	4.5S RNA	rRNA
chr19	32686406	32686691	intron (NM_026487, intron 7 of 9)	intron (NM_026487, intron 7 of 9)	25750	NM_026487	67979	Mm.27123	NM_026487	ENSMUSG00000013662	Atad1	4921525H23Rik|AW107648|Thorase	ATPase family, AAA domain containing 1	protein-coding
chr12	83921784	83922326	promoter-TSS (NR_073564)	promoter-TSS (NR_073564)	-121	NR_073564	18222	Mm.4390	NM_010949	ENSMUSG00000021224	Numb	Nb	NUMB endocytic adaptor protein	protein-coding
chr9	3017874	3018093	Intergenic	GSAT_MM|Satellite|Satellite	20760	NR_039546	100628572		NR_039546	ENSMUSG00000106183	Mir101c	mir-101c|mmu-mir-101c	microRNA 101c	ncRNA
chr9	124256683	124257913	Intergenic	Intergenic	55396	NM_001243119	630836	Mm.458553	NM_001243117	ENSMUSG00000074829	2010315B03Rik	BC029716	RIKEN cDNA 2010315B03 gene	protein-coding
chr16	67620814	67621268	promoter-TSS (NM_001347247)	promoter-TSS (NM_001347247)	-133	NM_178721	239857	Mm.394300	NM_178721	ENSMUSG00000064115	Cadm2	2900078E11Rik|9330131D06|A830029E02Rik|Igdf4d|Igsf4d|NECL3|SynCAM 2|SynCAM2	cell adhesion molecule 2	protein-coding
chr18	84685290	84685856	intron (NM_023149, intron 1 of 11)	CpG	129	NM_023149	66054	Mm.29646	NM_023149	ENSMUSG00000024644	Cndp2	0610010E05Rik|C76600|Cn2|Dip-2|Pep-1|Pep1	CNDP dipeptidase 2 (metallopeptidase M20 family)	protein-coding
chr4	95966916	95967319	promoter-TSS (NR_045777)	promoter-TSS (NR_045777)	-82	NR_045777	319247	Mm.473527	NM_175680	ENSMUSG00000044125	9530080O11Rik	-	RIKEN cDNA 9530080O11 gene	ncRNA
chr11	9249761	9250178	intron (NM_178259, intron 4 of 61)	intron (NM_178259, intron 4 of 61)	58027	NM_178259	268379	Mm.39270	NM_178259	ENSMUSG00000004668	Abca13	9830132L24|A930002G16Rik|AI956815	ATP-binding cassette, sub-family A (ABC1), member 13	protein-coding
chr11	53430790	53431414	promoter-TSS (NM_001326614)	promoter-TSS (NM_001326614)	-271	NM_025352	22272	Mm.251621	NM_025352	ENSMUSG00000044894	Uqcrq	1100001F06Rik|1500040F11Rik|5830407L17Rik|9.5kDa|AA959903|QP-C|Qpc|Uqcrb|c1502	ubiquinol-cytochrome c reductase, complex III subunit VII	protein-coding
chr11	121236864	121237377	promoter-TSS (NM_026272)	promoter-TSS (NM_026272)	-116	NM_026272	67608	Mm.291832	NM_026272	ENSMUSG00000000056	Narf	4430402O11Rik	nuclear prelamin A recognition factor	protein-coding
chr2	125279944	125280458	Intergenic	Intergenic	32686	NM_023595	110074	Mm.282499	NM_023595	ENSMUSG00000027203	Dut	5031412I06Rik|5133400F09Rik|D2Bwg0749e|Dutp|dUTPase	deoxyuridine triphosphatase	protein-coding
chr11	76377908	76378349	intron (NM_008750, intron 1 of 7)	intron (NM_008750, intron 1 of 7)	21013	NM_008750	18230	Mm.27915	NM_008750	ENSMUSG00000020844	Nxn	l11Jus13	nucleoredoxin	protein-coding
chr9	107529855	107530070	TTS (NM_020263)	TTS (NM_020263)	-3983	NM_019704	56395	Mm.260153	NM_019704	ENSMUSG00000010045	Tmem115	C78915|Pl6|Pp6	transmembrane protein 115	protein-coding
chr14	16448645	16448987	intron (NM_001289760, intron 5 of 9)	(GGCTG)n|Simple_repeat|Simple_repeat	83610	NM_009409	21974	Mm.130362	NM_009409	ENSMUSG00000017485	Top2b	D230016L12Rik|Top-2	topoisomerase (DNA) II beta	protein-coding
chr18	7626664	7627292	promoter-TSS (NM_001161620)	promoter-TSS (NM_001161620)	-115	NM_001161620	75739	Mm.133293	NM_001081287	ENSMUSG00000057440	Mpp7	1110068J02Rik|2810038M04Rik|5430426E14Rik|AI415104|Gm955	membrane protein, palmitoylated 7 (MAGUK p55 subfamily member 7)	protein-coding
chr13	17694601	17695257	promoter-TSS (NM_138654)	promoter-TSS (NM_138654)	-164	NM_138654	192136	Mm.364180	NM_138654	ENSMUSG00000055137	Sugct	5033411D12Rik|D17907	succinyl-CoA glutarate-CoA transferase	protein-coding
chr2	30807513	30808118	promoter-TSS (NM_001356434)	promoter-TSS (NM_001356434)	-153	NR_151468	66617	Mm.33167	NM_170592	ENSMUSG00000026857	Ntmt1	2610205E22Rik|AL033331|AL033332|Mettl11a|NTM1A	N-terminal Xaa-Pro-Lys N-methyltransferase 1	protein-coding
chr18	21300087	21300816	promoter-TSS (NM_001033445)	promoter-TSS (NM_001033445)	-312	NM_001033445	381126	Mm.312276	NM_001033445	ENSMUSG00000042680	Garem1	C86169|Fam59a|Garem|Gm944|mKIAA4238	GRB2 associated regulator of MAPK1 subtype 1	protein-coding
chrX	149784053	149784628	promoter-TSS (NM_001198987)	promoter-TSS (NM_001198987)	-139	NM_001114400	434866	Mm.491025	NM_001114400	ENSMUSG00000096834	Gm15127	-	predicted gene 15127	protein-coding
chr17	13550680	13551496	intron (NR_045436, intron 1 of 4)	(CTGTG)n|Simple_repeat|Simple_repeat	3006	NR_045437	72578	Mm.46549	NR_045436	ENSMUSG00000117042	2700054A10Rik	-	RIKEN cDNA 2700054A10 gene	ncRNA
chr5	45449823	45450654	promoter-TSS (NM_024236)	promoter-TSS (NM_024236)	-9	NM_024236	110391	Mm.30204	NM_024236	ENSMUSG00000015806	Qdpr	2610008L04Rik|D5Ertd371e|Dhpr|PKU2	quinoid dihydropteridine reductase	protein-coding
chr7	29063599	29064152	intron (NM_009109, intron 63 of 105)	ZP3AR|Satellite|Satellite	19819	NR_035489	100316710		NR_035489	ENSMUSG00000089219	Mir1963	mir-1963|mmu-mir-1963	microRNA 1963	ncRNA
chr7	43177288	43178025	promoter-TSS (NM_001034893)	promoter-TSS (NM_001034893)	66	NM_001034893	668620	Mm.388871	NM_001034893	ENSMUSG00000064194	Zfp936	EG435970|EG668620|Gm9272|I1C0022H11Rik	zinc finger protein 936	protein-coding
chr6	145337677	145338162	Intergenic	Intergenic	-49706	NR_003625	381827	Mm.179075	NM_001001987		1700073E17Rik	-	ribosomal protein L7 pseudogene	pseudo
chr11	110171213	110171837	Intergenic	ORR1B1|LTR|ERVL-MaLR	-3372	NM_147220	217262	Mm.291459	NM_147220	ENSMUSG00000041797	Abca9	D630040K07Rik	ATP-binding cassette, sub-family A (ABC1), member 9	protein-coding
chrX	148882302	148882810	promoter-TSS (NM_001114383)	promoter-TSS (NM_001114383)	-20	NM_001114383	434865	Mm.473681	NM_001114383	ENSMUSG00000079387	Luzp4	-	leucine zipper protein 4	protein-coding
chr19	11965127	11965743	promoter-TSS (NM_001033174)	promoter-TSS (NM_001033174)	-409	NM_001033174	76303	Mm.291279	NM_001033174	ENSMUSG00000024687	Osbp	1110018F06Rik|AW559088|mKIAA4220	oxysterol binding protein	protein-coding
chr17	84957081	84958030	promoter-TSS (NR_027929)	promoter-TSS (NR_027929)	-132	NR_027929	68531	Mm.249695	NR_027929	ENSMUSG00000097047	1110020A21Rik	2600015P10Rik	RIKEN cDNA 1110020A21 gene	ncRNA
chr5	97111423	97111976	promoter-TSS (NM_001359913)	promoter-TSS (NM_001359913)	-103	NM_001359913	231474	Mm.332505	NM_198422	ENSMUSG00000055725	Paqr3	6330415A20Rik|AY424292|RKTG	progestin and adipoQ receptor family member III	protein-coding
chr9	70987983	70988870	Intergenic	(CTGTG)n|Simple_repeat|Simple_repeat	-36205	NM_001324473	15450	Mm.390187	NM_008280	ENSMUSG00000032207	Lipc	AI256194|HL|Hpl	lipase, hepatic	protein-coding
chr2	173056765	173057228	Intergenic	Intergenic	35094	NM_019547	56190	Mm.485782	NM_019547	ENSMUSG00000027510	Rbm38	Rnpc1|Seb4|Seb4l	RNA binding motif protein 38	protein-coding
chr6	143520880	143521340	Intergenic	Intergenic	14398	NR_155418	75904	Mm.414916	NR_155418	ENSMUSG00000084971	4930579D09Rik	-	RIKEN cDNA 4930579D09 gene	ncRNA
chr11	86484296	86484921	promoter-TSS (NM_029788)	promoter-TSS (NM_029788)	-49	NM_029788	76892	Mm.262707	NM_029788	ENSMUSG00000020521	Rnft1	0610013E23Rik|AV007605	ring finger protein, transmembrane 1	protein-coding
chrX	134149993	134150333	3' UTR (NM_183319, exon 3 of 3)	3' UTR (NM_183319, exon 3 of 3)	12796	NM_183319	331524	Mm.235055	NM_183319	ENSMUSG00000031258	Xkrx	A630026F04	X-linked Kx blood group related, X-linked	protein-coding
chr9	7763730	7764254	promoter-TSS (NR_152989)	promoter-TSS (NR_152989)	-85	NM_133739	71929	Mm.283293	NM_133739	ENSMUSG00000050912	Tmem123	2310075C12Rik	transmembrane protein 123	protein-coding
chr3	145923900	145924458	promoter-TSS (NM_009740)	promoter-TSS (NM_009740)	-83	NM_009740	12042	Mm.239141	NM_009740	ENSMUSG00000028191	Bcl10	AI132454|BCL-10|C81403|CARMEN|CIPER|CLAP|ME10|cE10	B cell leukemia/lymphoma 10	protein-coding
chr9	42195499	42195931	intron (NR_040754, intron 3 of 6)	ORR1B2|LTR|ERVL-MaLR	13516	NR_040754	78194	Mm.251457	NR_040754	ENSMUSG00000111767	4930546K05Rik	-	RIKEN cDNA 4930546K05 gene	ncRNA
chr5	113693413	113693861	intron (NR_033216, intron 2 of 2)	G-rich|Low_complexity|Low_complexity	31135	NR_033216	381707	Mm.159016	NR_033216	ENSMUSG00000042184	1700069L16Rik	1700096P12Rik	RIKEN cDNA 1700069L16 gene	ncRNA
chr12	55916779	55917365	Intergenic	(CACCT)n|Simple_repeat|Simple_repeat	80706	NR_155205	52592	Mm.24761	NM_027867	ENSMUSG00000012076	Brms1l	0710008O11Rik|AI159718|BRMS1|D12Ertd407e	breast cancer metastasis-suppressor 1-like	protein-coding
chr15	43476993	43477260	promoter-TSS (NR_046064)	promoter-TSS (NR_046064)	-90	NR_046064	100038728	Mm.244168	NR_046064	ENSMUSG00000072592	Gm10373	-	predicted gene 10373	ncRNA
chr15	9085129	9085546	intron (NM_001085410, intron 3 of 13)	(CACAG)n|Simple_repeat|Simple_repeat	14077	NM_001085410	68646	Mm.244226	NM_001040395	ENSMUSG00000022253	Nadk2	MNADK|Nadkd1	NAD kinase 2, mitochondrial	protein-coding
chr10	80226359	80226924	promoter-TSS (NM_023431)	promoter-TSS (NM_023431)	43	NM_023431	68114	Mm.273418	NM_023431	ENSMUSG00000020156	Pwwp3a	2610019J09|9430059D04Rik|Mum1|UBE-1C2	PWWP domain containing 3A, DNA repair factor	protein-coding
chr6	97010938	97011543	intron (NM_177233, intron 3 of 5)	intron (NM_177233, intron 3 of 5)	49171	NM_177233	320701	Mm.131700	NM_177233	ENSMUSG00000046500	Tafa4	C130034I18Rik|Fam19a4|Fam19a4 Tafa-4|Tafa-4	TAFA chemokine like family member 4	protein-coding
chr1	131527286	131527912	promoter-TSS (NM_175382)	promoter-TSS (NM_175382)	-238	NM_001081011	14270	Mm.276259	NM_019520	ENSMUSG00000026425	Srgap2	9930124L22Rik|AI448945|FBP2|Fnbp2|srGAP3	SLIT-ROBO Rho GTPase activating protein 2	protein-coding
chr3	36862794	36863578	promoter-TSS (NM_172679)	promoter-TSS (NM_172679)	80	NM_172679	229227	Mm.207907	NM_172679	ENSMUSG00000037270	4932438A13Rik	4732443H21|B830039D19Rik|D630029K19Rik|FSA|Kiaa1109|Tweek	RIKEN cDNA 4932438A13 gene	protein-coding
chr13	65420186	65421132	Intergenic	CpG	-72065	NM_001371118
chr2	39190350	39191016	promoter-TSS (NM_178778)	promoter-TSS (NM_178778)	47	NM_178778	320271	Mm.204836	NM_178778	ENSMUSG00000035236	Scai	9330112M16|A930041I02Rik|AI662729	suppressor of cancer cell invasion	protein-coding
chr10	22142490	22143075	intron (NM_001254744, intron 1 of 1)	intron (NM_001254744, intron 1 of 1)	6488	NM_001254745	319887	Mm.177746	NM_001254744	ENSMUSG00000097327	E030030I06Rik	-	RIKEN cDNA E030030I06 gene	protein-coding
chr6	39848682	39849203	Intergenic	RMER1B|Other|Other	-22494	NM_001360978	434008	Mm.53915	NM_001004182	ENSMUSG00000057716	Tmem178b	A930009E05Rik|EG434008|Gm5567	transmembrane protein 178B	protein-coding
chr13	65450881	65451303	Intergenic	Intergenic	-102498	NM_001371118
chr2	122097876	122098092	intron (NM_145531, intron 9 of 39)	intron (NM_145531, intron 9 of 39)	20402	NM_145531	214585	Mm.222303	NM_145531	ENSMUSG00000033396	Spg11	6030465E24Rik|A330015I11|C530005A01Rik	SPG11, spatacsin vesicle trafficking associated	protein-coding
chr3	60045129	60045949	Intergenic	(CACAG)n|Simple_repeat|Simple_repeat	13751	NM_023383	67758	Mm.24547	NM_023383	ENSMUSG00000027761	Aadac	5033417E09Rik|AI265437|Aada	arylacetamide deacetylase	protein-coding
chr9	77684393	77684867	Intergenic	Intergenic	47898	NM_172925	244923	Mm.138238	NM_172925	ENSMUSG00000044938	Klhl31	9830147P19Rik|D930047P17Rik|Kbtbd1	kelch-like 31	protein-coding
chr17	27999723	28000210	intron (NM_181413, intron 11 of 24)	intron (NM_181413, intron 11 of 24)	80618	NM_001357681	21463	Mm.29758	NM_013687	ENSMUSG00000062859	Tcp11	D17Ken1|Tcp-11	t-complex protein 11	protein-coding
chr12	35592881	35593155	Intergenic	Intergenic	-58029	NM_013464	11622	Mm.341377	NM_013464	ENSMUSG00000019256	Ahr	Ah|Ahh|Ahre|In|bHLHe76	aryl-hydrocarbon receptor	protein-coding
chr10	22381273	22381714	Intergenic	Intergenic	19599	NM_020030	56554	Mm.458004	NM_020030	ENSMUSG00000078452	Raet1d	RAE-1delta	retinoic acid early transcript delta	protein-coding
chrX	135086720	135087407	Intergenic	Intergenic	-26727	NR_040282	320606	Mm.439072	NR_040281	ENSMUSG00000089759	3632454L22Rik	-	RIKEN cDNA 3632454L22 gene	ncRNA
chr5	135545187	135545757	promoter-TSS (NM_146001)	promoter-TSS (NM_146001)	-350	NM_146001	215114	Mm.280805	NM_146001	ENSMUSG00000039959	Hip1	2610109B09Rik|A930014B11Rik|E130315I21Rik|mKIAA4113	huntingtin interacting protein 1	protein-coding
chr17	31564297	31564837	promoter-TSS (NM_016670)	promoter-TSS (NM_016670)	-206	NR_027493	18771	Mm.259295	NM_016670	ENSMUSG00000006705	Pknox1	D17Wsu76e|PREP1	Pbx/knotted 1 homeobox	protein-coding
chr3	121952961	121953358	promoter-TSS (NM_172525)	promoter-TSS (NM_172525)	-70	NM_172525	214137	Mm.229287	NM_172525	ENSMUSG00000039831	Arhgap29	6720461J18Rik|A830014I19|AU040217|B130017I01Rik|C76601|Parg1	Rho GTPase activating protein 29	protein-coding
chr1	86358945	86359753	promoter-TSS (NR_015507)	promoter-TSS (NR_015507)	106	NM_010880	17975	Mm.154378	NM_010880	ENSMUSG00000026234	Ncl	B530004O11Rik|C23|D0Nds28|D1Nds28|Nucl	nucleolin	protein-coding
chr16	93711451	93711907	promoter-TSS (NM_026700)	promoter-TSS (NM_026700)	-228	NM_026700	70028	Mm.23230	NM_026700	ENSMUSG00000022946	Dop1b	0610038M01Rik|2610510B01Rik|AI503246|C21orf5|Dopey2|mKIAA0933	DOP1 leucine zipper like protein B	protein-coding
chr12	91147770	91148119	intron (NM_181815, intron 20 of 25)	(CAGAG)n|Simple_repeat|Simple_repeat	37715	NR_030473	735273		NR_030473	ENSMUSG00000076118	Mir669c	Mirn669c|Mirn669c-1	microRNA 669c	ncRNA
chr15	38308485	38308673	Intergenic	CT-rich|Low_complexity|Low_complexity	-7868	NM_013692	21847	Mm.4292	NM_013692	ENSMUSG00000037465	Klf10	AI115143|EGR[a]|Egral|Gdnfif|TIEG-1|Tieg|Tieg1|mGIF	Kruppel-like factor 10	protein-coding
chrY	2862991	2863416	Intergenic	Intergenic	32523	NM_011253	19657	Mm.4711	NM_011253	ENSMUSG00000094658	Rbmy	RBM|Rbm1|Rbm1-rs1|Rbmy1a1|Rbmy1a1-rs1|Rbmy1b	RNA binding motif protein, Y chromosome	protein-coding
chr7	123369873	123370364	promoter-TSS (NM_001122643)	promoter-TSS (NM_001122643)	-203	NM_001122640	70497	Mm.403318	NM_144529	ENSMUSG00000030766	Arhgap17	5730403H17Rik|Nadrin|Nadrin2|Rich1|Wbp15	Rho GTPase activating protein 17	protein-coding
chr5	144358032	144358814	promoter-TSS (NR_102372)	promoter-TSS (NR_102372)	-102	NR_102373	100579137		NR_102372	ENSMUSG00000104600	Dmrt1i	Dmr	Dmrt1 interacting ncRNA	ncRNA
chr13	59054459	59054836	intron (NM_001025074, intron 15 of 17)	intron (NM_001025074, intron 15 of 17)	246950	NM_001025074	18212	Mm.130054	NM_008745	ENSMUSG00000055254	Ntrk2	GP145-TrkB/GP95-TrkB|Tkrb|trk-B|trkB	neurotrophic tyrosine kinase, receptor, type 2	protein-coding
chr5	8622632	8623378	promoter-TSS (NM_001359961)	promoter-TSS (NM_001359961)	-53	NM_001359961	242819	Mm.332192	NM_198620	ENSMUSG00000040570	Rundc3b	Gm440	RUN domain containing 3B	protein-coding
chr17	7169628	7170537	promoter-TSS (NM_011299)	promoter-TSS (NM_011299)	-33	NM_011299	20112	Mm.268383	NM_011299	ENSMUSG00000023809	Rps6ka2	90kDa|D17Wsu134e|Rps6ka-rs1|Rsk3|p90rsk|pp90rsk	ribosomal protein S6 kinase, polypeptide 2	protein-coding
chr14	57559148	57559997	intron (NM_026526, intron 2 of 4)	intron (NM_026526, intron 2 of 4)	12010	NM_026526	68043	Mm.45225	NM_026526	ENSMUSG00000021951	Eef1akmt1	2510005D08Rik|AW045965|Ayu21-96|Gt(pU21)96Imeg|GtAyu21-96|N6amt2	EEF1A alpha lysine methyltransferase 1	protein-coding
chr7	90475892	90476727	promoter-TSS (NM_026734)	promoter-TSS (NM_026734)	-314	NM_026734	68472	Mm.289791	NM_026734	ENSMUSG00000030614	Tmem126b	1110001A23Rik	transmembrane protein 126B	protein-coding
chr13	66698027	66698717	Intergenic	Intergenic	206978	NM_026219	67530	Mm.379136	NM_026219	ENSMUSG00000021520	Uqcrb	2210415M14Rik|QP-C|QPC|UQBC|UQBP|UQPC	ubiquinol-cytochrome c reductase binding protein	protein-coding
chr2	166447650	166448122	non-coding (NR_015558, exon 1 of 3)	non-coding (NR_015558, exon 1 of 3)	435	NR_015558	319684	Mm.399746	NR_015558		5031425F14Rik	-	RIKEN cDNA 5031425F14 gene	ncRNA
chr1	9874307	9874526	intron (NM_001037759, intron 5 of 16)	intron (NM_001037759, intron 5 of 16)	26135	NM_001037759	170755	Mm.336410	NM_133220	ENSMUSG00000025915	Sgk3	2510015P22Rik|A330005P07Rik|Cisk|fy|fz	serum/glucocorticoid regulated kinase 3	protein-coding
chr11	104469294	104469747	promoter-TSS (NM_001359634)	promoter-TSS (NM_001359634)	-659	NM_001359634	76719	Mm.136418	NM_001081045	ENSMUSG00000018412	Kansl1	1700081L11Rik|9430041J06Rik|mKIAA1267	KAT8 regulatory NSL complex subunit 1	protein-coding
chr2	3283547	3284225	promoter-TSS (NM_001290368)	promoter-TSS (NM_001290368)	-326	NM_001290368	18108	Mm.65021	NM_008708	ENSMUSG00000026643	Nmt2	A930001K02Rik|AI605445|AU044698|hNMT-2	N-myristoyltransferase 2	protein-coding
chr13	65949881	65950748	Intergenic	Intergenic	-163139	NM_001177832	628709	Mm.390595	NM_001177832	ENSMUSG00000095909	Gm10324	-	predicted gene 10324	protein-coding
chr4	134734049	134734927	Intergenic	Intergenic	-30198	NM_207237	230815	Mm.18905	NM_207237	ENSMUSG00000037306	Man1c1	AI593348	mannosidase, alpha, class 1C, member 1	protein-coding
chr3	95588503	95589120	promoter-TSS (NM_001177669)	promoter-TSS (NM_001177669)	-123	NM_146133	229593	Mm.245830	NM_146133	ENSMUSG00000046519	Golph3l	2010204I15Rik|AU015439|AW549227|C77637|Gpp34r	golgi phosphoprotein 3-like	protein-coding
chr5	115380136	115380475	Intergenic	Intergenic	-20182	NR_163911
chr13	56522086	56522712	promoter-TSS (NM_001346732)	promoter-TSS (NM_001346732)	-73	NM_001346732	213311	Mm.233904	NM_178674	ENSMUSG00000035509	Fbxl21	D630045D17Rik|FBL3B|FBXL3B|Psttm	F-box and leucine-rich repeat protein 21	protein-coding
chr17	64331797	64332690	promoter-TSS (NM_001025309)	promoter-TSS (NM_001025309)	-360	NM_144859	224938	Mm.489681	NM_144859	ENSMUSG00000024083	Pja2	AI447901|AL022700|Neurodap1|mKIAA0438	praja ring finger ubiquitin ligase 2	protein-coding
chr13	65351593	65352683	Intergenic	CpG	-3544	NM_001371118
chr6	53049406	53049830	intron (NM_173406, intron 1 of 4)	(CTGTG)n|Simple_repeat|Simple_repeat	19006	NM_173406	231986	Mm.386865	NM_173406	ENSMUSG00000063568	Jazf1	AI591476|C820002C15|Jaz1|Tip27	JAZF zinc finger 1	protein-coding
chr8	121578717	121579365	promoter-TSS (NM_133765)	promoter-TSS (NM_133765)	-235	NM_133765	76454	Mm.24829	NM_133765	ENSMUSG00000052934	Fbxo31	1110003O08Rik|2310046N15Rik|Fbx14|Fbxo14	F-box protein 31	protein-coding
chr7	101501107	101501722	intron (NM_001008548, intron 8 of 30)	(CAGAGA)n|Simple_repeat|Simple_repeat	26038	NR_029791	387157		NR_029791	ENSMUSG00000065446	Mir139	Mirn139|mir-139|mmu-mir-139	microRNA 139	ncRNA
chr7	15998430	15999245	intron (NM_001081418, intron 1 of 13)	ZP3AR|Satellite|Satellite	658	NM_001081418	243842	Mm.440249	NM_001081418	ENSMUSG00000070808	Bicra	Gltscr1	BRD4 interacting chromatin remodeling complex associated protein	protein-coding
chr7	27494799	27495208	Intergenic	ZP3AR|Satellite|Satellite	-4321	NM_019412	19153	Mm.10119	NM_019412	ENSMUSG00000053198	Prx	L-Periaxin	periaxin	protein-coding
chr5	142781690	142782138	intron (NM_178242, intron 4 of 15)	ZP3AR|Satellite|Satellite	35748	NM_001122730	231861	Mm.354649	NM_178242	ENSMUSG00000039477	Tnrc18	BC025631|EG381742|Zfp469	trinucleotide repeat containing 18	protein-coding
chr13	69611140	69611761	promoter-TSS (NM_145354)	promoter-TSS (NM_145354)	13	NM_175283	78925	Mm.451912	NM_175283	ENSMUSG00000021594	Srd5a1	0610031P22Rik|4930435F02Rik|S5AR 1|Srd5a-1	steroid 5 alpha-reductase 1	protein-coding
chr18	33041491	33041860	intron (NM_009793, intron 1 of 10)	ORR1B1|LTR|ERVL-MaLR	102634	NM_009793	12326	Mm.222329	NM_009793	ENSMUSG00000038128	Camk4	A430110E23Rik|AI666733|CaMKIV|CaMKIV/Gr|D18Bwg0362e	calcium/calmodulin-dependent protein kinase IV	protein-coding
chr4	48279504	48280161	promoter-TSS (NM_029572)	promoter-TSS (NM_029572)	72	NM_001281978	16348	Mm.317706	NM_010569	ENSMUSG00000028344	Invs	Nphp2|inv	inversin	protein-coding
chr9	70622923	70623595	intron (NM_172772, intron 5 of 8)	(CTGTG)n|Simple_repeat|Simple_repeat	33915	NM_172772	235461	Mm.170855	NM_172772	ENSMUSG00000042444	Mindy2	AI465301|B230380D07Rik|Fam63b|mKIAA1164	MINDY lysine 48 deubiquitinase 2	protein-coding
chr18	38476436	38477307	Intergenic	Intergenic	57964	NM_022996	65113	Mm.102496	NM_022996	ENSMUSG00000024425	Ndfip1	0610010M22Rik|N4wbp5	Nedd4 family interacting protein 1	protein-coding
chr11	103990132	103990513	Intergenic	Intergenic	23451	NM_007477	11841	Mm.5061	NM_007477	ENSMUSG00000062421	Arf2	-	ADP-ribosylation factor 2	protein-coding
chr19	24961527	24961954	promoter-TSS (NR_033744)	promoter-TSS (NR_033744)	-124	NM_146097	226043	Mm.272127	NM_146097	ENSMUSG00000024878	Cbwd1	AV349248|BC018472	COBW domain containing 1	protein-coding
chr9	26806089	26806774	promoter-TSS (NM_153803)	promoter-TSS (NM_153803)	37	NM_001310768	244757	Mm.293696	NM_153803	ENSMUSG00000036395	Glb1l2	-	galactosidase, beta 1-like 2	protein-coding
chr5	44271634	44272146	Intergenic	Intergenic	-45284	NM_173764	231225	Mm.30688	NM_173764	ENSMUSG00000046985	Tapt1	4932414K18Rik	transmembrane anterior posterior transformation 1	protein-coding
chr6	88577877	88578268	intron (NM_001278671, intron 5 of 5)	CpG	49357	NM_001278671	74589	Mm.196226	NM_029013	ENSMUSG00000033182	Kbtbd12	4833415F11Rik|4933428M03Rik|Klhdc6	kelch repeat and BTB (POZ) domain containing 12	protein-coding
chr18	49979215	49979563	promoter-TSS (NM_001177760)	promoter-TSS (NM_001177760)	-38	NM_001177759	106869	Mm.27740	NM_134131	ENSMUSG00000062210	Tnfaip8	AA987150|E130304C20Rik|Gg2-1|Gm10539|Nded|Ssc-2|Tipe	tumor necrosis factor, alpha-induced protein 8	protein-coding
chr17	30083430	30083869	intron (NM_001356265, intron 2 of 5)	L1M3e|LINE|L1	78610	NM_001356265	21769	Mm.220972	NM_148926	ENSMUSG00000044477	Zfand3	AW539211|TEG-27|Tex27	zinc finger, AN1-type domain 3	protein-coding
chr16	24446326	24446647	intron (NM_178665, intron 2 of 12)	intron (NM_178665, intron 2 of 12)	-1605	NM_001145952	210126	Mm.209385	NM_178665	ENSMUSG00000033306	Lpp	9430020K16Rik|AA959454|AU024130|B130055L10Rik|C79715|D630048H16	LIM domain containing preferred translocation partner in lipoma	protein-coding
chr9	66874138	66874686	intron (NM_173413, intron 1 of 7)	intron (NM_173413, intron 1 of 7)	-39706	NM_026674	68318	Mm.284229	NM_026674	ENSMUSG00000053040	Aph1c	0610008A10Rik|APH-1b|Aph1b	aph1 homolog C, gamma secretase subunit	protein-coding
chr17	94887018	94887307	Intergenic	(TTAGGG)n|Simple_repeat|Simple_repeat	22244	NM_001024731	100044193		NM_001024731		Gm20939	-	predicted gene, 20939	protein-coding
chr2	46281910	46282231	Intergenic	(CCTCG)n|Simple_repeat|Simple_repeat	585465	NR_040497	69405	Mm.396184	NR_040497	ENSMUSG00000086202	1700019E08Rik	-	RIKEN cDNA 1700019E08 gene	ncRNA
chr1	21632750	21632978	intron (NM_001160139, intron 1 of 14)	intron (NM_001160139, intron 1 of 14)	249308	NM_001113187	98582	Mm.326336	NM_001113187	ENSMUSG00000085079	Khdc1b	AU014713|AU015226|AU024076|AY238603|C85331|C86372|C88118|Khdc1|Khdc1c	KH domain containing 1B	protein-coding
chr4	146474709	146475313	Intergenic	CpG	25981	NM_001085522	433791	Mm.276881	NM_001085522	ENSMUSG00000070605	Zfp992	Gm13251	zinc finger protein 992	protein-coding
chr12	11455748	11456082	promoter-TSS (NM_001111118)	promoter-TSS (NM_001111118)	-140	NM_001111118	209550		NM_001111118	ENSMUSG00000086022	Rad51ap2	EG209550	RAD51 associated protein 2	protein-coding
chr3	153148953	153149283	intron (NR_108044, intron 2 of 2)	C-rich|Low_complexity|Low_complexity	2990	NR_108044	75001		NR_108044		4930482G09Rik	-	RIKEN cDNA 4930482G09 gene	ncRNA
chr8	39366893	39367198	intron (NR_044988, intron 3 of 3)	(CTGTG)n|Simple_repeat|Simple_repeat	69065	NR_044988	621335	Mm.208080	NR_044988	ENSMUSG00000109827	Gm6213	EG621335	predicted gene 6213	ncRNA
chr18	48010338	48010598	intron (NR_045404, intron 2 of 3)	(CCCTAA)n|Simple_repeat|Simple_repeat	-34867	NM_001025388	433182	Mm.70666	NM_001025388	ENSMUSG00000059040	Eno1b	EG433182|Eno-1|Eno1|Gm5506|NNE	enolase 1B, retrotransposed	protein-coding
chr5	76818766	76819271	Intergenic	GA-rich|Low_complexity|Low_complexity	-21581	NM_001163793	320827	Mm.101504	NM_001163793	ENSMUSG00000036377	C530008M17Rik	2810489J07Rik|4930529A19Rik|4931405B09Rik|Crad|mKIAA1211	RIKEN cDNA C530008M17 gene	protein-coding
chr11	20542606	20543391	promoter-TSS (NM_021372)	promoter-TSS (NM_021372)	-168	NM_021372	58172	Mm.339676	NM_021372	ENSMUSG00000049800	Sertad2	AB041541|AU021878|Kiaa0127|MNCb-1504|SEI-2|Sei2|TRIP-Br2|mKIAA0127	SERTA domain containing 2	protein-coding
chr14	98265116	98265337	Intergenic	(CAGGG)n|Simple_repeat|Simple_repeat	-95461	NM_007826	13134	Mm.320593	NM_007826	ENSMUSG00000055639	Dach1	Dac|Dach	dachshund family transcription factor 1	protein-coding
chr13	91460671	91461272	promoter-TSS (NM_024186)	promoter-TSS (NM_024186)	-126	NM_001360776	66970	Mm.343095	NM_024186	ENSMUSG00000003992	Ssbp2	1500004K09Rik|2310079I02Rik|9330163K02Rik|A830008M03Rik|AU067692|AW558684|Hspc116|SSDP2	single-stranded DNA binding protein 2	protein-coding
chr4	153670193	153670752	Intergenic	Intergenic	-187642	NM_001099299	230959	Mm.318874	NM_001099299	ENSMUSG00000039546	Ajap1	Gm573	adherens junction associated protein 1	protein-coding
chr4	19925171	19925489	Intergenic	(CTGTG)n|Simple_repeat|Simple_repeat	-2764	NM_175406	242341	Mm.19298	NM_175406	ENSMUSG00000028238	Atp6v0d2	1620401A02Rik|AI324824|V-ATPase	ATPase, H+ transporting, lysosomal V0 subunit D2	protein-coding
chr12	31605861	31606461	intron (NM_007530, intron 5 of 6)	(GTGTG)n|Simple_repeat|Simple_repeat	28436	NM_007530	12033	Mm.242379	NM_007530	ENSMUSG00000020650	Bcap29	AW208404|Bap29	B cell receptor associated protein 29	protein-coding
chr2	25983274	25983867	promoter-TSS (NM_001276360)	promoter-TSS (NM_001276360)	-288	NM_001276359	227634	Mm.36834	NM_001115076	ENSMUSG00000026933	Camsap1	9530003A05Rik|C77823|PRO2405	calmodulin regulated spectrin-associated protein 1	protein-coding
chr11	26183632	26184067	intron (NR_027973, intron 1 of 5)	(CACAG)n|Simple_repeat|Simple_repeat	-18391	NR_105791	102466154		NR_105791	ENSMUSG00000099015	Mir6372	Gm27358|mmu-mir-6372	microRNA 6372	ncRNA
chr1	39755816	39756866	Intergenic	(CTGTG)n|Simple_repeat|Simple_repeat	-35352	NM_001145660	619289	Mm.334107	NM_001145660	ENSMUSG00000057173	Rfx8	4933400N17Rik	regulatory factor X 8	protein-coding
chr9	115216159	115216691	intron (NM_148958, intron 7 of 11)	intron (NM_148958, intron 7 of 11)	65645	NR_029430	111186	Mm.484753	NR_029430		Stmn1-rs1	Lag-rs1|Lap18-rs1	stathmin 1, related sequence 1	pseudo
chr17	57047405	57047888	intron (NM_025877, intron 8 of 9)	ZP3AR|Satellite|Satellite	-5992	NM_175333	103775	Mm.33647	NM_175333	ENSMUSG00000011486	Slc25a41	4933406J04Rik|AI507137	solute carrier family 25, member 41	protein-coding
chr2	177172580	177173298	Intergenic	Intergenic	171983	NM_001362250	628147	Mm.374080	NM_001362250		Gm2004	100039000	predicted gene 2004	protein-coding
chrX	149097771	149098376	intron (NM_001122734, intron 1 of 6)	intron (NM_001122734, intron 1 of 6)	121	NM_011022	18422	Mm.420007	NM_011022	ENSMUSG00000094885	Ott	AV272316	ovary testis transcribed	protein-coding
chr7	6728357	6729071	intron (NM_008817, intron 1 of 8)	intron (NM_008817, intron 1 of 8)	1705	NM_008817	18616	Mm.389800	NM_008817	ENSMUSG00000002265	Peg3	AL022617|ASF-1|End4|Gcap4|Pw1|Zfp102|mKIAA0287	paternally expressed 3	protein-coding
chr18	66236426	66236753	intron (NM_178793, intron 2 of 10)	intron (NM_178793, intron 2 of 10)	-17256	NR_030467	751558		NR_030467	ENSMUSG00000076147	Mir694	Mirn694|mir-694|mmu-mir-694	microRNA 694	ncRNA
chr6	55018317	55018817	Intergenic	C-rich|Low_complexity|Low_complexity	-19434	NM_180678	353172	Mm.250004	NM_180678	ENSMUSG00000029777	Gars	GENA202|Gena201|Nmf249|Sgrp23	glycyl-tRNA synthetase	protein-coding
chr3	121967615	121968225	5' UTR (NM_001356524, exon 1 of 23)	5' UTR (NM_001356524, exon 1 of 23)	114	NM_001356524	214137	Mm.229287	NM_172525	ENSMUSG00000039831	Arhgap29	6720461J18Rik|A830014I19|AU040217|B130017I01Rik|C76601|Parg1	Rho GTPase activating protein 29	protein-coding
chr12	109790359	109790849	Intergenic	MLTR11A|LTR|ERVK	42726	NR_037233	100499517		NR_037233	ENSMUSG00000093351	Mir3072	mir-3072|mmu-mir-3072	microRNA 3072	ncRNA
chr2	120628804	120629351	promoter-TSS (NM_001370940)	promoter-TSS (NM_001370940)	-44	NM_001370940	668880	Mm.2289	NM_010621	ENSMUSG00000033705	Stard9	4831403C07Rik|E230025N21Rik|Kif16a|mKIAA1300	START domain containing 9	protein-coding
chr12	71830821	71831122	promoter-TSS (NM_172464)	promoter-TSS (NM_172464)	-97	NM_172464	208846	Mm.87417	NM_026102	ENSMUSG00000034574	Daam1	-	dishevelled associated activator of morphogenesis 1	protein-coding
chr6	136816661	136817088	intron (NM_021714, intron 10 of 11)	CpG	8626	NM_177688	232440	Mm.154564	NM_177688	ENSMUSG00000060032	H2afj	E130307C13	H2A histone family, member J	protein-coding
chr15	35155730	35156081	promoter-TSS (NM_001357821)	promoter-TSS (NM_001357821)	-99	NM_019635	56274	Mm.262330	NM_019635	ENSMUSG00000022329	Stk3	0610042I06Rik|MST|Mst2|Mst3|Ste20|mess1	serine/threonine kinase 3	protein-coding
chr1	175692216	175693233	promoter-TSS (NM_010098)	promoter-TSS (NM_010098)	-92	NM_010098	13603	Mm.32744	NM_010098	ENSMUSG00000026525	Opn3	ERO|Ecpn	opsin 3	protein-coding
chr14	107358197	107358487	Intergenic	RLTR44B|LTR|ERVK	-871822	NR_045938	73631	Mm.48862	NR_045938	ENSMUSG00000099794	1700128A07Rik	-	RIKEN cDNA 1700128A07 gene	ncRNA
chr6	39745930	39746468	Intergenic	B1F|SINE|Alu	-20736	NM_139294	109880	Mm.245513	NM_139294	ENSMUSG00000002413	Braf	9930012E13Rik|AA120551|AA387315|AA473386|B-raf|Braf-2|Braf2|C230098H17|C87398|D6Ertd631e	Braf transforming gene	protein-coding
chr17	24549497	24550196	promoter-TSS (NM_013630)	promoter-TSS (NM_013630)	-104	NM_013630	18763	Mm.30435	NM_013630	ENSMUSG00000032855	Pkd1	PC1|mFLJ00285	polycystin 1, transient receptor poteintial channel interacting	protein-coding
chr4	145774297	145775248	Intergenic	Intergenic	-6771	NM_001083918	666532	Mm.392861	NM_001083918	ENSMUSG00000067916	Zfp991	Gm13139	zinc finger protein 991	protein-coding
chr11	121956478	121957075	Intergenic	Intergenic	126558	NM_029049	74675	Mm.61213	NM_029049	ENSMUSG00000039198	Ptchd3	4930451E13Rik|4933440L20Rik|RNDEu-3	patched domain containing 3	protein-coding
chr19	33761234	33762002	5' UTR (NM_001322338, exon 1 of 11)	5' UTR (NM_001322338, exon 1 of 11)	333	NM_001322338	101055671		NM_001322338	ENSMUSG00000087303	Lipo2	EG668114|Gm8981	lipase, member O2	protein-coding
chr4	52989052	52989678	promoter-TSS (NM_028529)	promoter-TSS (NM_028529)	81	NM_028529	73398	Mm.252738	NM_028529	ENSMUSG00000015242	Nipsnap3a	1700054F22Rik|AI429120	nipsnap homolog 3A	protein-coding
chr4	153869002	153869611	Intergenic	Intergenic	81170	NR_040670	407793	Mm.260950	NR_040670		BC039966	-	cDNA sequence BC039966	ncRNA
chr16	57391212	57391674	intron (NM_001040397, intron 1 of 4)	LSU-rRNA_Hsa|rRNA|rRNA	38166	NM_001040397	78749	Mm.328360	NM_001040397	ENSMUSG00000043336	Filip1l	4631422O05Rik|Doc1	filamin A interacting protein 1-like	protein-coding
chr7	99141065	99141591	promoter-TSS (NM_178635)	promoter-TSS (NM_178635)	-184	NM_178635	78610	Mm.323072	NM_178635	ENSMUSG00000035354	Uvrag	9530039D02Rik|AI648770|BB124205|Uvrag1|Uvragl	UV radiation resistance associated gene	protein-coding
chr16	86529632	86530263	Intergenic	Intergenic	276566	NR_153789	102635020	Mm.132956	NR_153789		Gm32461	-	predicted gene, 32461	ncRNA
chr1	191030879	191031153	Intergenic	Intergenic	-4826	NM_001313747	226844	Mm.134053	NM_198025	ENSMUSG00000066595	Flvcr1	9630055N22Rik|FLVCR|Mfsd7b	feline leukemia virus subgroup C cellular receptor 1	protein-coding
chr4	85185970	85186488	Intergenic	RMER1A|Other|Other	-19227	NM_019535	20404	Mm.143603	NM_019535	ENSMUSG00000028488	Sh3gl2	9530001L19Rik|AI120490|AW555077|B930049H17Rik|EEN-B1|SH3PA|Sh3d2a	SH3-domain GRB2-like 2	protein-coding
chr1	192453948	192454218	intron (NM_001038607, intron 10 of 10)	(CCCTAA)n|Simple_repeat|Simple_repeat	263306	NM_010600	16510	Mm.4489	NM_010600	ENSMUSG00000058248	Kcnh1	EAG1|Kv10.1|M-eag	potassium voltage-gated channel, subfamily H (eag-related), member 1	protein-coding
chr4	140860028	140860415	Intergenic	Intergenic	-12472	NR_040654	75128	Mm.67085	NR_040654	ENSMUSG00000087045	4930515B02Rik	-	RIKEN cDNA 4930515B02 gene	ncRNA
chr14	6889955	6890472	Intergenic	Intergenic	-133156	NM_001309401	100041151	Mm.396155	NM_001309401	ENSMUSG00000091754	Gm3636	100042043	predicted gene 3636	protein-coding
chr7	115216773	115217509	Intergenic	Intergenic	265867	NR_040319	101786	Mm.395157	NR_040317	ENSMUSG00000108379	A730082K24Rik	AU044236	RIKEN cDNA A730082K24 gene	ncRNA
chr4	155416134	155416423	intron (NM_001368738, intron 2 of 38)	(ACCTG)n|Simple_repeat|Simple_repeat	5426	NR_102283	641454	Mm.150322	NR_102283	ENSMUSG00000084803	5830444B04Rik	-	RIKEN cDNA 5830444B04 gene	ncRNA
chr5	147611436	147611629	intron (NM_010228, intron 15 of 29)	(TTAGGG)n|Simple_repeat|Simple_repeat	114479	NM_001363135	14254	Mm.389712	NM_010228	ENSMUSG00000029648	Flt1	AI323757|Flt-1|VEGFR-1|VEGFR1|sFlt1	FMS-like tyrosine kinase 1	protein-coding
chr7	52005535	52006462	promoter-TSS (NR_027704)	promoter-TSS (NR_027704)	20	NM_001160345	75744	Mm.386823	NM_001160345	ENSMUSG00000074093	Svip	1700006C13Rik|6620401M08Rik	small VCP/p97-interacting protein	protein-coding
chr13	62684557	62685218	Intergenic	Intergenic	-60705	NM_001324406	211378	Mm.247448	NM_173381	ENSMUSG00000072066	6720489N17Rik	9330128I06	RIKEN cDNA 6720489N17 gene	protein-coding
chr4	53011680	53012701	intron (NM_001347099, intron 1 of 4)	CpG	310	NM_025623	66536	Mm.38244	NM_025623	ENSMUSG00000015247	Nipsnap3b	2700063N13Rik|Nipsnap3a	nipsnap homolog 3B	protein-coding
chr6	134338001	134338422	intron (NR_153848, intron 3 of 8)	ORR1B2|LTR|ERVL-MaLR	-58118	NM_025778	66813	Mm.474472	NM_025778	ENSMUSG00000030200	Bcl2l14	4930452K23Rik|4933405K19Rik|9030625M01Rik|AI429211|Bclg	BCL2-like 14 (apoptosis facilitator)	protein-coding
chr6	87628873	87629467	3' UTR (NM_024251, exon 10 of 10)	3' UTR (NM_024251, exon 10 of 10)	-38427	NM_021381	58182	Mm.333226	NM_021381	ENSMUSG00000049409	Prokr1	EG-VEGFR1|Gpr73|Pk-r1|Pkr1	prokineticin receptor 1	protein-coding
chr2	180522784	180523166	intron (NM_018766, intron 1 of 3)	C-rich|Low_complexity|Low_complexity	22999	NM_018766	18216	Mm.301712	NM_018766	ENSMUSG00000027568	Ntsr1	NT-1R|NTR-1|NTR1	neurotensin receptor 1	protein-coding
chr17	25919726	25920544	promoter-TSS (NM_139154)	promoter-TSS (NM_139154)	-421	NM_139154	224624	Mm.328872	NM_139154	ENSMUSG00000025730	Rab40c	RAR3	Rab40C, member RAS oncogene family	protein-coding
chr7	89404112	89404679	promoter-TSS (NM_001360746)	promoter-TSS (NM_001360746)	29	NM_008055	14366	Mm.86755	NM_008055	ENSMUSG00000049791	Fzd4	Fz4	frizzled class receptor 4	protein-coding
chr18	46311652	46312243	promoter-TSS (NM_001160399)	promoter-TSS (NM_001160399)	-19	NM_001160399	240261	Mm.329416	NM_001160399	ENSMUSG00000071855	Ccdc112	8430438M01Rik|AW108467	coiled-coil domain containing 112	protein-coding
chr17	88687300	88687906	intron (NM_023630, intron 3 of 8)	intron (NM_023630, intron 3 of 8)	18943	NM_023630	71828	Mm.61330	NM_023630	ENSMUSG00000024154	Gtf2a1l	1700011N16Rik|Alf|Gtf2a1lf	general transcription factor IIA, 1-like	protein-coding
chr3	14611045	14611699	promoter-TSS (NM_001099674)	promoter-TSS (NM_001099674)	-116	NM_001099674	69126	Mm.389020	NM_001099674	ENSMUSG00000078784	Rbis	1810022K09Rik|AI746582|AL023036	ribosomal biogenesis factor	protein-coding
chr11	53891572	53892124	promoter-TSS (NM_011396)	promoter-TSS (NM_011396)	-145	NM_011396	20520	Mm.42253	NM_011396	ENSMUSG00000018900	Slc22a5	Lstpl|Octn2|jvs	solute carrier family 22 (organic cation transporter), member 5	protein-coding
chr3	97462240	97462648	Intergenic	(CACAG)n|Simple_repeat|Simple_repeat	-51265	NM_146275	258272	Mm.377406	NM_146275	ENSMUSG00000051392	Olfr1402	MOR217-1	olfactory receptor 1402	protein-coding
chr10	44148500	44149367	promoter-TSS (NM_001368305)	promoter-TSS (NM_001368305)	-105	NM_001368305	11630	Mm.292082	NM_172393	ENSMUSG00000019866	Crybg1	Aim1	crystallin beta-gamma domain containing 1	protein-coding
chr4	21766771	21767350	exon (NM_029840, exon 1 of 4)	exon (NM_029840, exon 1 of 4)	151	NM_029840	77032	Mm.87238	NM_029840	ENSMUSG00000028251	Tstd3	2610029I01Rik	thiosulfate sulfurtransferase (rhodanese)-like domain containing 3	protein-coding
chr18	3008439	3009566	Intergenic	RLTR30|LTR|ERV1	114410	NM_001167539	100312476	Mm.480293	NM_001167539	ENSMUSG00000091539	Vmn1r238	-	vomeronasal 1 receptor, 238	protein-coding
chr11	4440972	4441535	promoter-TSS (NM_029458)	promoter-TSS (NM_029458)	-171	NM_029458	75828	Mm.159592	NM_029458	ENSMUSG00000020419	Hormad2	4930529M09Rik	HORMA domain containing 2	protein-coding
chr9	122117013	122117302	promoter-TSS (NM_001357776)	promoter-TSS (NM_001357776)	-109	NM_001164572	20623	Mm.257989	NM_133741	ENSMUSG00000038145	Snrk	2010012F07Rik|AI448042|AW547029|E030034B15|R74830|mKIAA0096	SNF related kinase	protein-coding
chr1	153401816	153402085	Intergenic	Intergenic	12283	NR_033736	626058	Mm.31556	NM_001177359		E330020D12Rik	EG626058|F430003O07Rik|Gm6648	Riken cDNA E330020D12 gene	ncRNA
chr12	106513130	106513676	Intergenic	Intergenic	-65737	NR_036593	76639	Mm.375609	NR_036593	ENSMUSG00000092066	1700121N20Rik	-	RIKEN cDNA 1700121N20 gene	ncRNA
chr3	104220411	104220860	promoter-TSS (NM_133853)	promoter-TSS (NM_133853)	-229	NM_133853	99470	Mm.264849	NM_133853	ENSMUSG00000052539	Magi3	4732496O19Rik|6530407C02Rik|AA407180|AI120132|mKIAA1634	membrane associated guanylate kinase, WW and PDZ domain containing 3	protein-coding
chr1	178187360	178188392	5' UTR (NM_024282, exon 1 of 5)	5' UTR (NM_024282, exon 1 of 5)	459	NM_024282	78825	Mm.440132	NM_024282	ENSMUSG00000026502	Desi2	5830417C01Rik|DeSI-2|Fam152a|Pppde1	desumoylating isopeptidase 2	protein-coding
chr7	116093026	116093542	promoter-TSS (NM_019772)	promoter-TSS (NM_019772)	-96	NM_019772	56372	Mm.24231	NM_019772	ENSMUSG00000030663	1110004F10Rik	Smacp|Smap|sid2057|sid2057p	RIKEN cDNA 1110004F10 gene	protein-coding
chr11	41632589	41632778	Intergenic	(CA)n|Simple_repeat|Simple_repeat	368174	NM_008073	14406	Mm.5309	NM_008073	ENSMUSG00000020436	Gabrg2	GABAA-R|Gabrg-2|gamma2	gamma-aminobutyric acid (GABA) A receptor, subunit gamma 2	protein-coding
chr11	22617581	22618047	Intergenic	Intergenic	105531	NM_153596	103765	Mm.221274	NM_153596	ENSMUSG00000049904	Tmem17	AI503894|AW049890	transmembrane protein 17	protein-coding
chr5	128981590	128981962	Intergenic	Intergenic	8460	NM_001359022	13852	Mm.260716	NM_007941	ENSMUSG00000029428	Stx2	AW538950|Epim|G1-536-1|Syn-2|repro34	syntaxin 2	protein-coding
chr5	21645400	21646191	promoter-TSS (NM_026034)	promoter-TSS (NM_026034)	-190	NM_177076	320118	Mm.442295	NM_177076	ENSMUSG00000048520	Fbxl13	4921539K22Rik	F-box and leucine-rich repeat protein 13	protein-coding
chr5	135688743	135689331	promoter-TSS (NM_008898)	promoter-TSS (NM_008898)	-108	NM_008898	18984	Mm.3863	NM_008898	ENSMUSG00000005514	Por	4933424M13Rik|CPR|CYPOR|P450R	P450 (cytochrome) oxidoreductase	protein-coding
chr17	53152415	53152673	Intergenic	(CCCTAA)n|Simple_repeat|Simple_repeat	310777	NM_172497	211482	Mm.60887	NM_172497	ENSMUSG00000023931	Efhb	4921525D22Rik	EF hand domain family, member B	protein-coding
chr17	21650406	21650881	promoter-TSS (NM_001166497)	promoter-TSS (NM_001166497)	32	NM_001357098	73229	Mm.296733	NM_001166497	ENSMUSG00000035868	Zfp983	3110052M02Rik|mszf57|mszf71	zinc finger protein 983	protein-coding
chr19	49022243	49022608	Intergenic	Intergenic	816400	NM_025696	66673	Mm.70980	NM_025696	ENSMUSG00000063434	Sorcs3	6330404A12Rik|AW045579	sortilin-related VPS10 domain containing receptor 3	protein-coding
chr9	123461805	123462199	3' UTR (NM_001348168, exon 22 of 22)	3' UTR (NM_001348168, exon 22 of 22)	-16699	NM_013860	29806	Mm.10987	NM_013860	ENSMUSG00000025239	Limd1	AW822033|D9Ertd192e	LIM domains containing 1	protein-coding
chr14	59810381	59810846	intron (NM_015803, intron 26 of 35)	intron (NM_015803, intron 26 of 35)	185332	NM_145463	219134	Mm.275409	NM_145463	ENSMUSG00000044461	Shisa2	9430059P22Rik|MAd2|Tmem46|mShisa|shisa	shisa family member 2	protein-coding
chr5	136686786	136687202	Intergenic	ZP3AR|Satellite|Satellite	-6152	NM_021611	59310	Mm.5178	NM_021611	ENSMUSG00000005474	Myl10	1700027I08Rik|Mylc2pl|PLRLC	myosin, light chain 10, regulatory	protein-coding
chr12	31950219	31950735	promoter-TSS (NM_153198)	promoter-TSS (NM_153198)	-232	NM_001361928	73389	Mm.390461	NM_153198	ENSMUSG00000002996	Hbp1	1700058O05Rik|BE629963|C330012F01Rik|C86454	high mobility group box transcription factor 1	protein-coding
chr6	89644352	89644943	intron (NM_001178058, intron 1 of 15)	CpG	659	NM_153162	232223	Mm.229332	NM_153162	ENSMUSG00000000811	Txnrd3	AI196535|TGR|TR2	thioredoxin reductase 3	protein-coding
chr6	90988760	90989457	Intergenic	Intergenic	127718	NM_018815	54563	Mm.28162	NM_018815	ENSMUSG00000030091	Nup210	9830001L10|AI836801|Pom210|gp190|gp210	nucleoporin 210	protein-coding
chr12	16664992	16665382	Intergenic	RMER17B|LTR|ERVK	11717	NM_001361703	18217	Mm.281715	NM_008747	ENSMUSG00000020591	Ntsr2	NT-R-2|NT2R|NTR2|NTRL	neurotensin receptor 2	protein-coding
chr9	3003312	3003654	Intergenic	GSAT_MM|Satellite|Satellite	35260	NR_039546	100628572		NR_039546	ENSMUSG00000106183	Mir101c	mir-101c|mmu-mir-101c	microRNA 101c	ncRNA
chr6	108065088	108065638	intron (NM_178391, intron 1 of 1)	intron (NM_178391, intron 1 of 1)	318	NM_178391	74729	Mm.56539	NM_178391	ENSMUSG00000034639	Setmar	5830404F24Rik|Etet2	SET domain without mariner transposase fusion	protein-coding
chr2	154603418	154603953	promoter-TSS (NM_021534)	promoter-TSS (NM_021534)	-12	NM_021534	59038	Mm.24673	NM_021534	ENSMUSG00000000876	Pxmp4	3010018P03Rik|Pmp24	peroxisomal membrane protein 4	protein-coding
chr13	60096902	60097508	intron (NR_046142, intron 1 of 2)	(CACAG)n|Simple_repeat|Simple_repeat	67494	NR_046142	328263	Mm.123405	NR_046142	ENSMUSG00000114531	A530065N20Rik	A530065N20	RIKEN cDNA A530046M15 gene	ncRNA
chr8	69625148	69625839	promoter-TSS (NM_172754)	promoter-TSS (NM_172754)	55	NM_172754	234362	Mm.458487	NM_172754	ENSMUSG00000060427	Zfp868	AI449175|AW108241|C530032E20|mszf62	zinc finger protein 868	protein-coding
chr8	35572732	35573112	Intergenic	(CACAG)n|Simple_repeat|Simple_repeat	-14867	NR_157105	52065	Mm.103246	NM_001081279	ENSMUSG00000070056	Mfhas1	2310066G09Rik|D8Ertd91e	malignant fibrous histiocytoma amplified sequence 1	protein-coding
chr13	53800572	53800920	Intergenic	Lx8|LINE|L1	115002	NR_152124	78550	Mm.160095	NR_152124		E130119H09Rik	-	RIKEN cDNA E130119H09 gene	ncRNA
chr7	44929489	44930115	promoter-TSS (NM_007458)	promoter-TSS (NM_007458)	-312	NM_007458	11771	Mm.6877	NM_007458	ENSMUSG00000060279	Ap2a1	Adtaa	adaptor-related protein complex 2, alpha 1 subunit	protein-coding
chr1	192794860	192795399	Intergenic	Intergenic	-23910	NM_144881	226861	Mm.145857	NM_144881	ENSMUSG00000037375	Hhat	2810432O22Rik|AI462858|AP-2CRE|Skn|Tg(TFAP2A-cre)1Will	hedgehog acyltransferase	protein-coding
chr7	30717423	30717842	intron (NM_018731, intron 10 of 21)	intron (NM_018731, intron 10 of 21)	5423	NM_018731	11944	Mm.12821	NM_018731	ENSMUSG00000005553	Atp4a	-	ATPase, H+/K+ exchanging, gastric, alpha polypeptide	protein-coding
chr11	106083921	106084667	promoter-TSS (NM_011947)	promoter-TSS (NM_011947)	-608	NM_011947	26406	Mm.27041	NM_011947	ENSMUSG00000020700	Map3k3	AW548911|MAPKKK3|Mekk3|mKIAA4031	mitogen-activated protein kinase kinase kinase 3	protein-coding
chr13	50673643	50674427	Intergenic	Intergenic	6189	NR_045474	69211	Mm.259768	NR_045474		2310081J21Rik	-	RIKEN cDNA 2310081J21 gene	ncRNA
chr14	19976894	19977459	promoter-TSS (NM_001285910)	promoter-TSS (NM_001285910)	73	NM_001285908	14702	Mm.41737	NM_010315	ENSMUSG00000043004	Gng2	-	guanine nucleotide binding protein (G protein), gamma 2	protein-coding
chr1	167349760	167350134	promoter-TSS (NM_019993)	promoter-TSS (NM_019993)	-44	NM_019993	56752	Mm.292539	NM_019993	ENSMUSG00000026687	Aldh9a1	AA139417|Abaldh|ESTM40|TMABA-DH|Tmabadh	aldehyde dehydrogenase 9, subfamily A1	protein-coding
chr11	89081700	89082045	intron (NM_001033266, intron 2 of 3)	(CTGTG)n|Simple_repeat|Simple_repeat	8031	NM_001033266	217071	Mm.342127	NM_001033266	ENSMUSG00000072553	Gm525	-	predicted gene 525	protein-coding
chr7	138829789	138830446	Intergenic	CpG	16150	NM_001045483	69546	Mm.31598	NM_027115	ENSMUSG00000041775	Mapk1ip1	2310009E07Rik|AU043776|MISS	mitogen-activated protein kinase 1 interacting protein 1	protein-coding
chr1	37419501	37419734	3' UTR (NM_198006, exon 3 of 3)	3' UTR (NM_198006, exon 3 of 3)	10486	NM_198006	76178	Mm.28085	NM_198006	ENSMUSG00000026112	Coa5	1700001A24Rik|6330578E17Rik|Pet191	cytochrome C oxidase assembly factor 5	protein-coding
chr9	80164505	80165287	promoter-TSS (NM_001039546)	promoter-TSS (NM_001039546)	-138	NM_001039546	17920	Mm.4040	NM_008662	ENSMUSG00000033577	Myo6	BC029719|Myo6<rsv>|Tlc|rsv|sv	myosin VI	protein-coding
chr14	62580987	62581321	intron (NM_001243857, intron 2 of 3)	intron (NM_001243857, intron 2 of 3)	25417	NM_001243857	629059	Mm.291864	NM_001243857	ENSMUSG00000035184	Fam124a	EG629059	family with sequence similarity 124, member A	protein-coding
chr5	108682385	108682876	intron (NM_172997, intron 12 of 13)	intron (NM_172997, intron 12 of 13)	-7265	NM_174870	231583	Mm.440571	NM_174870	ENSMUSG00000046959	Slc26a1	Sat1	solute carrier family 26 (sulfate transporter), member 1	protein-coding
chr5	140649028	140649592	promoter-TSS (NM_001308040)	promoter-TSS (NM_001308040)	-279	NM_175274	78339	Mm.28947	NM_175274	ENSMUSG00000036565	Ttyh3	2900029G13Rik|AI414930|TTY3|mTTY3	tweety family member 3	protein-coding
chr2	177074004	177074743	Intergenic	Intergenic	73417	NM_001362250	628147	Mm.374080	NM_001362250		Gm2004	100039000	predicted gene 2004	protein-coding
chr14	40966833	40967404	promoter-TSS (NM_145928)	promoter-TSS (NM_145928)	-222	NM_145928	52588	Mm.28876	NM_145928	ENSMUSG00000037824	Tspan14	AA958793|D14Ertd226e|Tm4sf14|tspan-14	tetraspanin 14	protein-coding
chr13	97308406	97309076	Intergenic	Intergenic	67636	NM_007930	13803	Mm.241073	NM_007930	ENSMUSG00000041773	Enc1	Nrpb|PIG10	ectodermal-neural cortex 1	protein-coding
chr5	14985291	14985589	Intergenic	Lx2A1|LINE|L1	-6541	NM_001281514	100503549	Mm.491086	NM_001281514	ENSMUSG00000072188	Gm10354	-	predicted gene 10354	protein-coding
chr14	120830359	120830815	Intergenic	CpG	-80607	NM_023579	70572	Mm.221452	NM_023579	ENSMUSG00000030662	Ipo5	1110011C18Rik|5730478E03Rik|AA409333|C76941|IMB3|Kpnb3|Ranbp5|imp5	importin 5	protein-coding
chr10	67979331	67979971	promoter-TSS (NM_001359319)	promoter-TSS (NM_001359319)	81	NM_001359318	170799	Mm.209844	NM_133244	ENSMUSG00000037846	Rtkn2	B130039D23Rik|Mbf|Plekhk1	rhotekin 2	protein-coding
chr18	22985091	22985763	intron (NM_001361224, intron 1 of 10)	intron (NM_001361224, intron 1 of 10)	53236	NM_001161483	319211	Mm.209896	NM_199024	ENSMUSG00000041923	Nol4	1700013J13Rik|4930568N03Rik|Gm1262	nucleolar protein 4	protein-coding
chr4	139683942	139684341	Intergenic	Intergenic	30603	NM_031873	83770	Mm.190612	NM_031873	ENSMUSG00000028738	Tas1r2	Gpr71|T1r2|TR2	taste receptor, type 1, member 2	protein-coding
chr12	108757915	108758307	Intergenic	CpG	-35186	NM_009537	22632	Mm.3868	NM_009537	ENSMUSG00000021264	Yy1	NF-E1|YY-1	YY1 transcription factor	protein-coding
chr14	65149573	65150238	Intergenic	CpG	-51799	NM_001360385	54616	Mm.103748	NM_018788	ENSMUSG00000021978	Extl3	2900009G18Rik|AU040105|Ext1l|mKIAA0519	exostoses (multiple)-like 3	protein-coding
chr2	94157735	94158346	promoter-TSS (NM_019657)	promoter-TSS (NM_019657)	-131	NM_019657	56348	Mm.22505	NM_019657	ENSMUSG00000027195	Hsd17b12	2610510O05Rik|AI172963|KIK-I|Kik1	hydroxysteroid (17-beta) dehydrogenase 12	protein-coding
chr13	99881658	99882067	Intergenic	Intergenic	18821	NM_013732	27220	Mm.75498	NM_013732	ENSMUSG00000021647	Cartpt	Cart	CART prepropeptide	protein-coding
chr8	95593878	95594375	Intergenic	Intergenic	-18519	NM_001310539	70993	Mm.486561	NM_027640	ENSMUSG00000048400	Prss54	4931432M23Rik|Klkbl4	protease, serine 54	protein-coding
chr10	57485952	57486386	promoter-TSS (NM_008297)	promoter-TSS (NM_008297)	184	NR_045353	74928	Mm.416643	NR_045353	ENSMUSG00000097370	4930467K11Rik	-	RIKEN cDNA 4930467K11 gene	ncRNA
chr11	105112425	105113101	intron (NM_001081046, intron 9 of 9)	intron (NM_001081046, intron 9 of 9)	-13662	NM_172567	52686	Mm.270091	NM_172567	ENSMUSG00000020691	Mettl2	2810438F06Rik|AW493404|C130031G21Rik|D11Ertd768e|METL|PSENIP1	methyltransferase like 2	protein-coding
chr10	122619490	122620069	Intergenic	Intergenic	-28560	NR_105839	102465223		NR_105839	ENSMUSG00000098522	Mir6412	Gm27364|mmu-mir-6412	microRNA 6412	ncRNA
chr13	81632896	81633489	promoter-TSS (NM_054053)	promoter-TSS (NM_054053)	-48	NM_054053	110789	Mm.288694	NM_054053	ENSMUSG00000069170	Adgrv1	Frings|Gpr98|Mass1|Mgr1|VLGR1	adhesion G protein-coupled receptor V1	protein-coding
chr13	29986138	29986662	promoter-TSS (NM_010093)	promoter-TSS (NM_010093)	-337	NM_010093	13557	Mm.268356	NM_010093	ENSMUSG00000016477	E2f3	E2F3b|E2f3a	E2F transcription factor 3	protein-coding
chr4	104648695	104649080	intron (NM_001369049, intron 7 of 19)	(TAGTG)n|Simple_repeat|Simple_repeat	-117430	NM_001316671	110382	Mm.87072	NM_133882	ENSMUSG00000029656	C8b	4930439B20Rik|AI595927	complement component 8, beta polypeptide	protein-coding
chr5	146260997	146261352	intron (NM_153599, intron 2 of 12)	LSU-rRNA_Hsa|rRNA|rRNA	29924	NM_001359991	264064	Mm.260576	NM_153599	ENSMUSG00000029635	Cdk8	-	cyclin-dependent kinase 8	protein-coding
chr16	4639697	4640339	promoter-TSS (NM_139307)	promoter-TSS (NM_139307)	73	NM_139307	246154	Mm.482140	NM_139307	ENSMUSG00000039646	Vasn	2610528G05Rik|Atia|Slitl2	vasorin	protein-coding
chr15	25622124	25622717	promoter-TSS (NM_019472)	promoter-TSS (NM_019472)	-130	NM_019472	17909	Mm.60590	NM_019472	ENSMUSG00000022272	Myo10	AW048724|D15Ertd600e|mKIAA0799|myosin-X	myosin X	protein-coding
chr1	153332849	153333571	promoter-TSS (NM_010683)	promoter-TSS (NM_010683)	-424	NM_010683	226519	Mm.1249	NM_010683	ENSMUSG00000026478	Lamc1	Lamb2	laminin, gamma 1	protein-coding
chr18	81600457	81601029	Intergenic	Intergenic	391337	NR_039589	100628596		NR_039589	ENSMUSG00000093036	Mir5127	mmu-mir-5127|mu-mir-5127	microRNA 5127	ncRNA
chr7	84689860	84690406	promoter-TSS (NM_001360582)	promoter-TSS (NM_001360582)	-176	NM_001360578	65098	Mm.209349	NM_022985	ENSMUSG00000030629	Zfand6	3110005P07Rik|Awp1|Za20d3	zinc finger, AN1-type domain 6	protein-coding
chr5	134107162	134107599	intron (NM_030719, intron 1 of 8)	ZP3AR|Satellite|Satellite	7632	NM_030719	80909	Mm.45218	NM_030719	ENSMUSG00000015944	Castor2	7530428J21Rik|AW742413|Gats|Gatsl1|Gatsl2	cytosolic arginine sensor for mTORC1 subunit 2	protein-coding
chr15	75748056	75748829	promoter-TSS (NM_194350)	promoter-TSS (NM_194350)	-121	NM_194350	378435		NM_194350	ENSMUSG00000047591	Mafa	RIPE3b1	v-maf musculoaponeurotic fibrosarcoma oncogene family, protein A (avian)	protein-coding
chr9	3017027	3017202	Intergenic	GSAT_MM|Satellite|Satellite	21629	NR_039546	100628572		NR_039546	ENSMUSG00000106183	Mir101c	mir-101c|mmu-mir-101c	microRNA 101c	ncRNA
chr4	59117834	59118269	intron (NM_001370843, intron 1 of 27)	intron (NM_001370843, intron 1 of 27)	20932	NM_001370843	100155	Mm.331636	NM_001033200	ENSMUSG00000038598	Shoc1	AI481877|Gm426|Mzip2	shortage in chiasmata 1	protein-coding
chr5	131545675	131546163	intron (NM_001363480, intron 5 of 19)	ZP3AR|Satellite|Satellite	-131201	NR_152164	545809	Mm.357553	NR_152164	ENSMUSG00000105387	Gm29681	Gm42590	predicted gene, 29681	ncRNA
chr11	94240661	94241094	intron (NM_181819, intron 1 of 1)	intron (NM_181819, intron 1 of 1)	1702	NM_181819	278507	Mm.342216	NM_181819	ENSMUSG00000044177	Wfikkn2	2610304F08Rik|AY100450|Gasp1|WFIKKNRP	WAP, follistatin/kazal, immunoglobulin, kunitz and netrin domain containing 2	protein-coding
chr17	3081542	3082892	intron (NR_003519, intron 1 of 7)	intron (NR_003519, intron 1 of 7)	1966	NR_003519	328734	Mm.335641	NR_003519		Pisd-ps2	D030013I16Rik	phosphatidylserine decarboxylase, pseudogene 2	pseudo
chr4	56865110	56865721	promoter-TSS (NM_018761)	promoter-TSS (NM_018761)	-204	NM_018761	54366	Mm.218891	NM_018761	ENSMUSG00000038816	Ctnnal1	ACRP|AI616177|AW545119|C86009|Catnal1	catenin (cadherin associated protein), alpha-like 1	protein-coding
chr16	21204357	21204882	promoter-TSS (NM_010143)	promoter-TSS (NM_010143)	-176	NM_010143	13845	Mm.6972	NM_010143	ENSMUSG00000005958	Ephb3	AW456895|Cek10|Etk2|HEK2|MDK5|Sek4|Tyro6	Eph receptor B3	protein-coding
chr8	3284843	3285105	Intergenic	Intergenic	-5357	NM_001330056	16337	Mm.268003	NM_010568	ENSMUSG00000005534	Insr	4932439J01Rik|CD220|D630014A15Rik|IR|IR-A|IR-B	insulin receptor	protein-coding
chr4	153974106	153974447	intron (NM_007859, intron 2 of 6)	(CACAG)n|Simple_repeat|Simple_repeat	805	NM_007859	13368	Mm.388918	NM_007859	ENSMUSG00000029027	Dffb	40kDa|5730477D02Rik|CAD|CPAN|DFF40|Didff	DNA fragmentation factor, beta subunit	protein-coding
chr15	95136217	95136622	intron (NR_015482, intron 2 of 2)	(CTGTG)n|Simple_repeat|Simple_repeat	12899	NR_015482	100043315	Mm.159041	NR_015482	ENSMUSG00000100603	LOC100043315	-	uncharacterized LOC100043315	ncRNA
chr4	134381079	134381569	Intergenic	(CTCTG)n|Simple_repeat|Simple_repeat	-8777	NM_019578	56219	Mm.30978	NM_019578	ENSMUSG00000028838	Extl1	D430033M16Rik	exostoses (multiple)-like 1	protein-coding
chr7	36669574	36670039	Intergenic	ZP3AR|Satellite|Satellite	-28312	NM_172298	243931	Mm.44141	NM_172298	ENSMUSG00000021217	Tshz3	A630038G13Rik|Tsh3|Zfp537|mKIAA1474|teashirt3	teashirt zinc finger family member 3	protein-coding
chr6	67037292	67037724	promoter-TSS (NM_007836)	promoter-TSS (NM_007836)	-101	NM_007836	13197	Mm.72235	NM_007836	ENSMUSG00000036390	Gadd45a	AA545191|Ddit1|GADD45	growth arrest and DNA-damage-inducible 45 alpha	protein-coding
chr14	21500404	21500922	intron (NM_017479, intron 1 of 16)	CpG	878	NM_017479	54169	Mm.248967	NM_017479	ENSMUSG00000021767	Kat6b	AI507552|B130044K16Rik|MYST-4|Morf|Myst4|mKIAA0383|qkf|querkopf	K(lysine) acetyltransferase 6B	protein-coding
chr15	99392669	99393151	promoter-TSS (NM_026669)	promoter-TSS (NM_026669)	-37	NM_001171036	110213	Mm.16769	NM_026669	ENSMUSG00000023010	Tmbim6	5031406P05Rik|Bi1|Tegt	transmembrane BAX inhibitor motif containing 6	protein-coding
chr19	57725049	57725361	intron (NM_181415, intron 19 of 28)	RMER1B|Other|Other	114171	NM_181415	226255	Mm.245340	NM_181415	ENSMUSG00000054843	Atrnl1	AI504415|AW555641|Alp|Atrnl|Atrnlp	attractin like 1	protein-coding
chr1	189869651	189870013	intron (NM_008976, intron 18 of 18)	intron (NM_008976, intron 18 of 18)	52459	NM_026796	226830	Mm.156895	NM_026796	ENSMUSG00000026603	Smyd2	1110020E07Rik|4930402C15|KMT3C|Zmynd14	SET and MYND domain containing 2	protein-coding
chrY	38187332	38187522	Intergenic	L1Md_A|LINE|L1	229607	NM_207162	382133	Mm.463885	NM_207162	ENSMUSG00000094575	Gm20738	-	predicted gene, 20738	protein-coding
chr18	46997823	46998225	intron (NM_178377, intron 5 of 6)	intron (NM_178377, intron 5 of 6)	39148	NM_178377	69456	Mm.210734	NM_178377	ENSMUSG00000042705	Commd10	2310003A05Rik|AU019438|DRWMS2|Tg(Vav1-icre)A2Kio|Vav-cre|Vav-iCre|Vav1-Cre|VavCre	COMM domain containing 10	protein-coding
chr10	83533927	83534400	promoter-TSS (NM_153543)	promoter-TSS (NM_153543)	-23	NM_153543	216188	Mm.263138	NM_153543	ENSMUSG00000020256	Aldh1l2	D330038I09Rik|mtFDH	aldehyde dehydrogenase 1 family, member L2	protein-coding
chr7	14029441	14029638	Intergenic	(GGGAA)n|Simple_repeat|Simple_repeat	-39951	NM_001101534	434121	Mm.482762	NM_001101534	ENSMUSG00000074377	Sult2a4	EG434121|Gm5584	sulfotransferase family 2A, dehydroepiandrosterone (DHEA)-preferring, member 4	protein-coding
chr3	6116027	6116236	Intergenic	(TTAGGG)n|Simple_repeat|Simple_repeat	504312	NM_027048	69347	Mm.45822	NM_027048	ENSMUSG00000069118	1700008P02Rik	-	RIKEN cDNA 1700008P02 gene	protein-coding
chr6	149565753	149566295	promoter-TSS (NM_001360951)	promoter-TSS (NM_001360951)	-58	NM_001360951	436100		NM_001360951		Gm21814	6620401J10Rik	predicted gene, 21814	protein-coding
chr7	19628488	19629107	intron (NM_009046, intron 1 of 10)	intron (NM_009046, intron 1 of 10)	641	NM_001290457	19698	Mm.1741	NM_009046	ENSMUSG00000002983	Relb	shep	avian reticuloendotheliosis viral (v-rel) oncogene related B	protein-coding
chr9	94538108	94538944	promoter-TSS (NM_001033145)	promoter-TSS (NM_001033145)	-445	NM_001033145	68861	Mm.258746	NM_001033145	ENSMUSG00000045414	Dipk2a	1190002N15Rik|GoPro49|HASF	divergent protein kinase domain 2A	protein-coding
chr8	129301057	129301292	Intergenic	(TTAGGG)n|Simple_repeat|Simple_repeat	37544	NR_144501	102635552		NM_001346808		Gm32856	-	predicted gene, 32856	protein-coding
chr9	24624997	24625322	promoter-TSS (NM_173412)	promoter-TSS (NM_173412)	-26	NM_173412	235067	Mm.437189	NM_173412	ENSMUSG00000047995	Cypt4	1700009B20Rik|Ckt1r2	cysteine-rich perinuclear theca 4	protein-coding
chr4	93844327	93844581	Intergenic	(TTAGGG)n|Simple_repeat|Simple_repeat	-508943	NM_026954	69136	Mm.171558	NM_026954	ENSMUSG00000054000	Tusc1	2200001D17Rik|TSG-9	tumor suppressor candidate 1	protein-coding
chrY	8535088	8535306	Intergenic	RSINE1|SINE|B4	299972	NM_001017394	100039753	Mm.291725	NM_001017394	ENSMUSG00000101053	Gm20815	-	predicted gene, 20815	protein-coding
chr1	136624599	136624951	promoter-TSS (NM_177643)	promoter-TSS (NM_177643)	-126	NM_177643	226442	Mm.62521	NM_177643	ENSMUSG00000041483	Zfp281	Znf281	zinc finger protein 281	protein-coding
chr4	131131720	131132304	Intergenic	(GGCTG)n|Simple_repeat|Simple_repeat	-121538	NR_130167	77835	Mm.348412	NR_130167	ENSMUSG00000086262	A930031H19Rik	A930004I12Rik	RIKEN cDNA A930031H19 gene	ncRNA
chr5	103026942	103027315	intron (NM_001310685, intron 2 of 11)	intron (NM_001310685, intron 2 of 11)	31264	NM_001318131	26414	Mm.39253	NM_009158	ENSMUSG00000046709	Mapk10	C230008H04Rik|JNK3|JNK3B1|JNK3B2|SAPK(beta)|Serk2|p493F12|p54bSAPK	mitogen-activated protein kinase 10	protein-coding
chr10	76992514	76992894	Intergenic	Intergenic	-19291	NR_045882	100038479	Mm.387034	NR_045882	ENSMUSG00000074919	Gm10787	-	predicted gene 10787	ncRNA
chr13	12394812	12395356	promoter-TSS (NM_144835)	promoter-TSS (NM_144835)	-291	NM_144835	217995	Mm.171186	NM_144835	ENSMUSG00000050244	Heatr1	AA517551|B130016L12Rik|BC019693	HEAT repeat containing 1	protein-coding
chr7	3572923	3573693	Intergenic	RLTR30E_MM|LTR|ERV1	42849	NM_001290377	232790	Mm.358882	NM_175632	ENSMUSG00000054594	Oscar	mOSCAR|mOSCAR-M1|mOSCAR-M2|mOSCAR-M3	osteoclast associated receptor	protein-coding
chr13	66440972	66441547	promoter-TSS (NM_183119)	promoter-TSS (NM_183119)	-141	NM_001290196	76803	Mm.183391	NM_183119	ENSMUSG00000074832	2410141K09Rik	4930482J15Rik|Ayu21-35|Gt(pU21)35Imeg	RIKEN cDNA 2410141K09 gene	protein-coding
chr6	92092141	92092465	promoter-TSS (NM_001347342)	promoter-TSS (NM_001347342)	-130	NM_001347342	22026	Mm.87062	NM_011630	ENSMUSG00000005893	Nr2c2	TAK1|Tr4|mKIAA4145	nuclear receptor subfamily 2, group C, member 2	protein-coding
chr13	112826096	112826291	intron (NM_008903, intron 1 of 5)	(CATATA)n|Simple_repeat|Simple_repeat	25416	NM_008247	19012	Mm.291029	NM_008247	ENSMUSG00000021759	Plpp1	Hic53|Hpic53|LPP-1|LPP1|PAP-2a|PAP2-alpha|PAP2a|Ppap2a|mPAP	phospholipid phosphatase 1	protein-coding
chr1	189194276	189195124	Intergenic	Intergenic	148653	NM_001357119	16526	Mm.33304	NM_010607	ENSMUSG00000037624	Kcnk2	A430027H14Rik|AI848635|TREK-1	potassium channel, subfamily K, member 2	protein-coding
chrX	147774835	147775297	Intergenic	Intergenic	-217927	NM_001122734	100039934	Mm.474426	NM_001122734	ENSMUSG00000095621	Gm15085	-	predicted gene 15085	protein-coding
chr3	79000507	79000985	Intergenic	Intergenic	145000	NM_001310536	76089	Mm.31220	NM_001099624	ENSMUSG00000062232	Rapgef2	5830453M24Rik|CNRasGEF|Pdzgef1|RA-GEF-1|mKIAA0313|nRapGEP	Rap guanine nucleotide exchange factor (GEF) 2	protein-coding
chr4	3938515	3939275	promoter-TSS (NR_104354)	promoter-TSS (NR_104354)	7	NM_001190323	66433	Mm.27406	NM_181391	ENSMUSG00000042198	Chchd7	1810049H20Rik	coiled-coil-helix-coiled-coil-helix domain containing 7	protein-coding
chr14	56560286	56560740	intron (NM_001014996, intron 3 of 16)	intron (NM_001014996, intron 3 of 16)	11333	NM_001014996	219103	Mm.212525	NM_001014996	ENSMUSG00000064128	Cenpj	4932437H03Rik|CPAP|Gm81|LAP|LIP1|Sas4	centromere protein J	protein-coding
chr10	5823865	5824709	promoter-TSS (NM_175374)	promoter-TSS (NM_175374)	-344	NM_175374	108853	Mm.55082	NM_175374	ENSMUSG00000019774	Mtrf1l	9130004K12Rik	mitochondrial translational release factor 1-like	protein-coding
chr1	87246141	87246550	Intergenic	Intergenic	-18008	NM_028889	98363	Mm.247951	NM_028889	ENSMUSG00000026255	Efhd1	4931430I01Rik|AI452351|PP3051|mitocalcin	EF hand domain containing 1	protein-coding
chr17	86357084	86357703	intron (NM_011104, intron 2 of 14)	intron (NM_011104, intron 2 of 14)	-70215	NR_045435	72104	Mm.443401	NR_045435	ENSMUSG00000100738	2010106C02Rik	-	RIKEN cDNA 2010106C02 gene	ncRNA
chr15	36929257	36930018	Intergenic	C-rich|Low_complexity|Low_complexity	77765	NM_026521	68036	Mm.371631	NM_026521	ENSMUSG00000062397	Zfp706	3110006P09Rik|AA793007|AW536850|C77232|Znf706	zinc finger protein 706	protein-coding
chr4	156001393	156001671	intron (NM_001302467, intron 5 of 7)	intron (NM_001302467, intron 5 of 7)	8195	NM_001302468	20318	Mm.293517	NM_011341	ENSMUSG00000029076	Sdf4	Cab45	stromal cell derived factor 4	protein-coding
chr4	147275177	147275829	Intergenic	CpG	-167611	NM_001371348
chr9	82960202	82960682	intron (NM_001081216, intron 4 of 39)	intron (NM_001081216, intron 4 of 39)	15047	NM_001081216	83946	Mm.221688	NM_031879	ENSMUSG00000032253	Phip	2810004D21Rik|4632404O06Rik|Ndrp|Wdr11	pleckstrin homology domain interacting protein	protein-coding
chr7	45361241	45361639	intron (NM_029741, intron 2 of 29)	intron (NM_029741, intron 2 of 29)	-4721	NR_015480	50994	Mm.389897	NM_016664	ENSMUSG00000091510	Mtag2	MAG	metastasis associated gene 2	ncRNA
chr1	12840490	12840796	intron (NM_172294, intron 16 of 21)	intron (NM_172294, intron 16 of 21)	122098	NM_172294	240725	Mm.45563	NM_172294	ENSMUSG00000016918	Sulf1	AI467640|AW121680|mKIAA1077	sulfatase 1	protein-coding
chr8	4165839	4166552	promoter-TSS (NM_001346730)	promoter-TSS (NM_001346730)	-372	NM_001368791	213027	Mm.437106	NM_153536	ENSMUSG00000011832	Evi5l	1700084G18Rik|2310039H16Rik|3110007G05Rik|B130050I23Rik	ecotropic viral integration site 5 like	protein-coding
chr10	75394731	75395012	Intergenic	ORR1B2|LTR|ERVL-MaLR	-12040	NM_133995	103149	Mm.441195	NM_133995	ENSMUSG00000033427	Upb1	AI195023	ureidopropionase, beta	protein-coding
chr10	41040626	41041134	Intergenic	(GGCTG)n|Simple_repeat|Simple_repeat	31410	NM_199058	140741	Mm.290693	NM_199058	ENSMUSG00000046922	Gpr6	AI852874|Gm233	G protein-coupled receptor 6	protein-coding
chr2	167349166	167349728	promoter-TSS (NM_019835)	promoter-TSS (NM_019835)	-269	NM_019835	56336	Mm.200886	NM_019835	ENSMUSG00000017929	B4galt5	9430078I07Rik|AW049941|AW539721	UDP-Gal:betaGlcNAc beta 1,4-galactosyltransferase, polypeptide 5	protein-coding
chr14	32351171	32351837	Intergenic	Intergenic	29485	NM_001081130	239017	Mm.318302	NM_001081130	ENSMUSG00000021913	Ogdhl	-	oxoglutarate dehydrogenase-like	protein-coding
chr13	66802344	66802624	Intergenic	Intergenic	102866	NM_026219	67530	Mm.379136	NM_026219	ENSMUSG00000021520	Uqcrb	2210415M14Rik|QP-C|QPC|UQBC|UQBP|UQPC	ubiquinol-cytochrome c reductase binding protein	protein-coding
chr16	91597652	91598072	promoter-TSS (NM_030018)	promoter-TSS (NM_030018)	-182	NM_030018	77975	Mm.290341	NM_030018	ENSMUSG00000022964	Tmem50b	AU015466|AU019872|B230114J08Rik	transmembrane protein 50B	protein-coding
chr2	177956991	177957592	promoter-TSS (NM_001190302)	promoter-TSS (NM_001190302)	-3	NM_001282028	665211	Mm.441314	NM_001190302	ENSMUSG00000078862	Gm14326	-	predicted gene 14326	protein-coding
chr3	51298566	51299059	intron (NM_001356358, intron 4 of 10)	(CACAC)n|Simple_repeat|Simple_repeat	-21298	NM_001291062	69257	Mm.131038	NM_023502	ENSMUSG00000037174	Elf2	2610036A20Rik|A230104O07Rik|AW111824|BB183398|EU32|NERF|NERF-1A|NERF-1B|NERF-2	E74-like factor 2	protein-coding
chr13	23401698	23402422	Intergenic	Intergenic	21806	NM_013924	30946	Mm.292094	NM_013924	ENSMUSG00000036376	Abt1	-	activator of basal transcription 1	protein-coding
chr4	41124089	41124529	promoter-TSS (NM_139236)	promoter-TSS (NM_139236)	30	NM_139236	230082	Mm.285797	NM_139236	ENSMUSG00000028430	Nol6	AA410091|Nrap	nucleolar protein family 6 (RNA-associated)	protein-coding
chr8	107030859	107031386	promoter-TSS (NM_126165)	promoter-TSS (NM_126165)	-147	NM_126165	116733	Mm.236004	NM_126165	ENSMUSG00000031913	Vps4a	4930589C15Rik|AI325971|AW553189	vacuolar protein sorting 4A	protein-coding
chr18	34062248	34062628	Intergenic	ORR1A1|LTR|ERVL-MaLR	-55232	NM_013512	13824	Mm.3465	NM_013512	ENSMUSG00000024376	Epb41l4a	Epb4.1l4|Epb4.1l4a|NBL4	erythrocyte membrane protein band 4.1 like 4a	protein-coding
chr7	132347374	132347642	Intergenic	Intergenic	-30280	NM_029935	77590	Mm.213582	NM_029935	ENSMUSG00000030930	Chst15	4631426J05Rik|BRAG|GalNAc4S-6ST|GalNAcS-6ST|MAd5|mKIAA0598	carbohydrate sulfotransferase 15	protein-coding
chr8	47083782	47084011	intron (NM_177304, intron 7 of 7)	intron (NM_177304, intron 7 of 7)	97009	NM_177304	320981	Mm.211429	NM_177304	ENSMUSG00000038173	Enpp6	4833421B01Rik|B830047L21Rik|D8Ertd514e|E-NPP 6|GPC-Cpde|Npp6	ectonucleotide pyrophosphatase/phosphodiesterase 6	protein-coding
chr14	16364923	16365328	promoter-TSS (NM_009409)	promoter-TSS (NM_009409)	-81	NM_009409	21974	Mm.130362	NM_009409	ENSMUSG00000017485	Top2b	D230016L12Rik|Top-2	topoisomerase (DNA) II beta	protein-coding
chr17	21679733	21680194	promoter-TSS (NM_001354753)	promoter-TSS (NM_001354753)	86	NM_001354753	100310809	Mm.293030	NM_001354753		Gm10509	-	predicted gene 10509	protein-coding
chr8	25016999	25017512	promoter-TSS (NM_027194)	promoter-TSS (NM_027194)	44	NM_027194	69742	Mm.28626	NM_027194	ENSMUSG00000031556	Tm2d2	2410018G23Rik|Blp1	TM2 domain containing 2	protein-coding
chr7	19749548	19750021	promoter-TSS (NM_001159724)	promoter-TSS (NM_001159724)	-211	NM_008990	19294	Mm.4341	NM_008990	ENSMUSG00000062300	Nectin2	AI325026|AI987993|Cd112|MPH|Pvr|Pvrl2|Pvs|nectin-2	nectin cell adhesion molecule 2	protein-coding
chr4	151228826	151229261	intron (NM_001081557, intron 6 of 23)	intron (NM_001081557, intron 6 of 23)	139473	NM_001308446	105704528	Mm.415128	NM_001308446	ENSMUSG00000078491	Gm13090	-	predicted gene 13090	protein-coding
chr5	134536167	134536717	intron (NM_001039162, intron 1 of 15)	ZP3AR|Satellite|Satellite	15992	NM_001039162	269713	Mm.255138	NM_009990	ENSMUSG00000063146	Clip2	B230327O20|CLIP-115|Clip1|Cyln2|WSCR4|mKIAA0291|wbscr4	CAP-GLY domain containing linker protein 2	protein-coding
chr4	102493968	102494807	intron (NM_019840, intron 2 of 14)	(CTGTG)n|Simple_repeat|Simple_repeat	-75673	NM_001177980	18578	Mm.20181	NM_019840	ENSMUSG00000028525	Pde4b	Dpde4|R74983|dunce	phosphodiesterase 4B, cAMP specific	protein-coding
chr1	169968888	169969534	promoter-TSS (NR_040438)	promoter-TSS (NR_040438)	-6	NM_010476	15490	Mm.12882	NM_010476	ENSMUSG00000026675	Hsd17b7	AI266814|ERG27	hydroxysteroid (17-beta) dehydrogenase 7	protein-coding
chrX	136976604	136977128	promoter-TSS (NM_001081983)	promoter-TSS (NM_001081983)	8	NM_001081983	666244	Mm.381904	NM_001081983	ENSMUSG00000089768	Tmsb15b1	Tm15b	thymosin beta 15b1	protein-coding
chr6	47771694	47772420	Intergenic	4.5SRNA|scRNA|scRNA	-19132	NR_002841	19799		NR_002841		Rn4.5s	-	4.5S RNA	rRNA
chr10	128566022	128566531	promoter-TSS (NM_011119)	promoter-TSS (NM_011119)	-342	NM_011119	18813	Mm.4742	NM_011119	ENSMUSG00000025364	Pa2g4	38kDa|AA672939|Ebp1|Plfap	proliferation-associated 2G4	protein-coding
chr2	66256379	66256875	promoter-TSS (NM_001290669)	promoter-TSS (NM_001290669)	-10	NM_001047604	73668	Mm.250868	NM_001047604	ENSMUSG00000034848	Ttc21b	2410066K11Rik|Thm1|aln|mKIAA1992	tetratricopeptide repeat domain 21B	protein-coding
chr8	91313042	91313723	promoter-TSS (NM_011936)	promoter-TSS (NM_011936)	-143	NM_011936	26383	Mm.4375	NM_011936	ENSMUSG00000055932	Fto	AW743446|mKIAA1752	fat mass and obesity associated	protein-coding
chr1	23383233	23383558	promoter-TSS (NM_001081079)	promoter-TSS (NM_001081079)	-220	NM_001081079	70155	Mm.28013	NM_001081079	ENSMUSG00000026158	Ogfrl1	2210417C17Rik	opioid growth factor receptor-like 1	protein-coding
chr8	119862015	119862362	promoter-TSS (NM_146219)	promoter-TSS (NM_146219)	-117	NM_146219	234796	Mm.86446	NM_146219	ENSMUSG00000031828	Klhl36	-	kelch-like 36	protein-coding
chr12	117588311	117588778	intron (NM_175930, intron 7 of 27)	C-rich|Low_complexity|Low_complexity	72065	NM_175930	217944	Mm.227642	NM_175930	ENSMUSG00000041992	Rapgef5	4932413M22|C86120|D030051B22Rik|GFR|Mrgef|mKIAA0277|mmr-gef	Rap guanine nucleotide exchange factor (GEF) 5	protein-coding
chr11	97188011	97188455	promoter-TSS (NM_008379)	promoter-TSS (NM_008379)	-341	NM_008379	16211	Mm.251013	NM_008379	ENSMUSG00000001440	Kpnb1	AA409963|IPOB|Impnb	karyopherin (importin) beta 1	protein-coding
chr19	55899101	55899539	intron (NM_001142924, intron 1 of 11)	intron (NM_001142924, intron 1 of 11)	3999	NM_001142924	21416	Mm.139815	NM_009333	ENSMUSG00000024985	Tcf7l2	TCF4B|TCF4E|Tcf-4|Tcf4	transcription factor 7 like 2, T cell specific, HMG box	protein-coding
chr8	4728113	4728584	Intergenic	Intergenic	51219	NM_011369	20419	Mm.37801	NM_011369	ENSMUSG00000022322	Shcbp1	mPAL	Shc SH2-domain binding protein 1	protein-coding
chr5	104088928	104089283	intron (NM_001359016, intron 7 of 11)	intron (NM_001359016, intron 7 of 11)	-11497	NM_001163772	100271704	Mm.366664	NM_001163772	ENSMUSG00000091034	Gm17660	Scpppq1	predicted gene, 17660	protein-coding
chr13	69426817	69427486	Intergenic	GA-rich|Low_complexity|Low_complexity	106713	NM_001169131	210106	Mm.315959	NM_198600	ENSMUSG00000034575	Tent4a	LAK-1|POLK|Papd7|Pols|TRF4|TRF4-1	terminal nucleotidyltransferase 4A	protein-coding
chrX	113297722	113298442	promoter-TSS (NM_001142570)	promoter-TSS (NM_001142570)	-174	NM_001142570	93837	Mm.79760	NM_033605	ENSMUSG00000025592	Dach2	9430028N04Rik	dachshund family transcription factor 2	protein-coding
chr2	143915048	143915596	promoter-TSS (NM_019771)	promoter-TSS (NM_019771)	-9	NM_019771	56431	Mm.28919	NM_019771	ENSMUSG00000015932	Dstn	2610043P17Rik|ADF|AU042046|Dsn|corn1|sid23p	destrin	protein-coding
chr7	66333984	66334387	intron (NM_146191, intron 3 of 33)	ORR1B1|LTR|ERVL-MaLR	47539	NR_106024	102465640		NR_106024	ENSMUSG00000098353	Mir7057	Gm27550|mmu-mir-7057	microRNA 7057	ncRNA
chr5	92042463	92042856	promoter-TSS (NM_001276315)	promoter-TSS (NM_001276315)	37	NM_001276315	53886	Mm.44963	NM_016912	ENSMUSG00000029403	Cdkl2	5330436L21Rik|AI505225|KKIAMRE|Kkm	cyclin-dependent kinase-like 2 (CDC2-related kinase)	protein-coding
chr2	177925526	177926145	promoter-TSS (NM_183135)	promoter-TSS (NM_183135)	-185	NM_183135	78703		NM_183135	ENSMUSG00000074529	Zfp972	C330013J21Rik	zinc finger protein 972	protein-coding
chr6	47772845	47773204	Intergenic	Intergenic	-20099	NR_002841	19799		NR_002841		Rn4.5s	-	4.5S RNA	rRNA
chr10	6514923	6515216	Intergenic	Intergenic	-243524	NM_001302796	18390	Mm.438000	NM_011013	ENSMUSG00000000766	Oprm1	M-OR-1|MOP-R|MOR-1|MOR-1O|Oprm|mor|muOR	opioid receptor, mu 1	protein-coding
chr6	47680782	47681005	TTS (NR_002841).8	TTS (NR_002841).8	165	NR_002841	19799		NR_002841		Rn4.5s	-	4.5S RNA	rRNA
chr17	15544036	15544965	exon (NM_144809, exon 10 of 10)	exon (NM_144809, exon 10 of 10)	-17199	NM_008799	18567	Mm.323	NM_008799	ENSMUSG00000014771	Pdcd2	AI528543|Pcd2|RP-8	programmed cell death 2	protein-coding
chr2	26445248	26445773	promoter-TSS (NM_153125)	promoter-TSS (NM_153125)	-294	NM_153125	227648	Mm.206371	NM_153125	ENSMUSG00000026924	Sec16a	AU024582|C230052J16Rik|p250	SEC16 homolog A, endoplasmic reticulum export factor	protein-coding
chr4	135272783	135273111	promoter-TSS (NM_013885)	promoter-TSS (NM_013885)	-187	NM_013885	29876	Mm.257765	NM_013885	ENSMUSG00000037242	Clic4	D0Jmb3|TU-74|mc3s5|mtCLIC	chloride intracellular channel 4 (mitochondrial)	protein-coding
chr5	137707583	137708307	Intergenic	ZP3AR|Satellite|Satellite	-23192	NM_001303271	231801	Mm.260869	NM_145566	ENSMUSG00000029722	Agfg2	A630095P14Rik|Hrbl|RAB-R|RABR	ArfGAP with FG repeats 2	protein-coding
chr6	51469886	51470404	promoter-TSS (NM_016806)	promoter-TSS (NM_016806)	-251	NM_016806	53379	Mm.155896	NM_016806	ENSMUSG00000004980	Hnrnpa2b1	9130414A06Rik|Hnrpa2|Hnrpa2b1|hnrnp-A	heterogeneous nuclear ribonucleoprotein A2/B1	protein-coding
chr15	85318331	85318598	Intergenic	MER44D|DNA|TcMar-Tigger	-17791	NM_016843	54138	Mm.248906	NM_016843	ENSMUSG00000016541	Atxn10	AI325283|C77170|E46|Sca10|TEG-169|Tex169	ataxin 10	protein-coding
chr1	38430404	38430715	intron (NM_001290814, intron 4 of 21)	intron (NM_001290814, intron 4 of 21)	196685	NM_001290814	16764	Mm.336679	NM_010678	ENSMUSG00000037138	Aff3	3222402O04Rik|A730046J16|LAF-4|Laf4	AF4/FMR2 family, member 3	protein-coding
chr2	58425946	58426547	Intergenic	(CACAG)n|Simple_repeat|Simple_repeat	-68488	NM_001111030	269275	Mm.77751	NM_001033369	ENSMUSG00000026834	Acvr1c	ACTR-IC|ACVRLK7|ALK7|Alk-7|C230097P10	activin A receptor, type IC	protein-coding
chr8	91133664	91134395	promoter-TSS (NM_001302267)	promoter-TSS (NM_001302267)	-2	NM_001302266	14339	Mm.324588	NM_010241	ENSMUSG00000031667	Aktip	AL023020|Fif|Ft|Ft1|Fts	thymoma viral proto-oncogene 1 interacting protein	protein-coding
chr11	77685853	77686342	promoter-TSS (NM_001024205)	promoter-TSS (NM_001024205)	-42	NM_001024205	68564	Mm.428996	NM_001024205	ENSMUSG00000037857	Nufip2	1110001M19Rik|9530056D24Rik|AI256692|AI461731|PIG1|mKIAA1321	nuclear fragile X mental retardation protein interacting protein 2	protein-coding
chr8	69716414	69717275	promoter-TSS (NM_001359086)	promoter-TSS (NM_001359086)	58	NM_181274	66869	Mm.334581	NM_181274	ENSMUSG00000054648	Zfp869	1200003I07Rik	zinc finger protein 869	protein-coding
chr8	72160883	72161648	promoter-TSS (NM_023126)	promoter-TSS (NM_023126)	65	NM_023126	17274	Mm.162811	NM_023126	ENSMUSG00000003037	Rab8a	AA409338|Mel	RAB8A, member RAS oncogene family	protein-coding
chr5	135148880	135149822	promoter-TSS (NM_013763)	promoter-TSS (NM_013763)	-335	NM_013763	27368	Mm.36746	NM_013763	ENSMUSG00000005374	Tbl2	C76179|WS-bTRP	transducin (beta)-like 2	protein-coding
chr6	88841950	88842600	promoter-TSS (NR_045880)	promoter-TSS (NR_045880)	-340	NM_030251	80283	Mm.166858	NM_030251	ENSMUSG00000030083	Abtb1	AI847549|BC003234|BPOZ|EF1ABP	ankyrin repeat and BTB (POZ) domain containing 1	protein-coding
chr5	141723346	141724328	intron (NM_177879, intron 4 of 44)	ZP3AR|Satellite|Satellite	482303	NM_177879	330222	Mm.151931	NM_177879	ENSMUSG00000039683	Sdk1	5330440E10|6720466O15Rik	sidekick cell adhesion molecule 1	protein-coding
chr6	6598054	6598404	Intergenic	CpG	-19571	NM_009169	20422	Mm.2469	NM_009169	ENSMUSG00000042541	Sem1	DSS1|Shfdg1|Shfg|Shfm1	SEM1, 26S proteasome complex subunit	protein-coding
chr5	65199443	65200060	promoter-TSS (NM_001359879)	promoter-TSS (NM_001359879)	55	NM_153391	213081	Mm.127550	NM_153391	ENSMUSG00000037890	Wdr19	C330027H04Rik|D330023L08Rik|DYF2|Ift144|PWDMP|mKIAA1638	WD repeat domain 19	protein-coding
chr7	139553143	139553518	intron (NM_001355162, intron 9 of 15)	(CACAG)n|Simple_repeat|Simple_repeat	29467	NR_027857	14912	Mm.28308	NM_183248	ENSMUSG00000041309	Nkx6-2	Gtx|Nkx6.2	NK6 homeobox 2	protein-coding
chr2	177277806	177278149	Intergenic	Intergenic	-186765	NM_001177568	628308	Mm.460436	NM_001177568	ENSMUSG00000078866	Zfp970	Gm14420	zinc finger protein 970	protein-coding
chr16	91282687	91282977	Intergenic	Intergenic	13063	NM_016968	50914	Mm.39300	NM_016968	ENSMUSG00000046160	Olig1	AI836478|AW494459|Bhlhb6|Olg-1|Oligo1|bHLHe21	oligodendrocyte transcription factor 1	protein-coding
chr9	3020816	3021146	Intergenic	GSAT_MM|Satellite|Satellite	17762	NR_039546	100628572		NR_039546	ENSMUSG00000106183	Mir101c	mir-101c|mmu-mir-101c	microRNA 101c	ncRNA
chr6	113306373	113306862	promoter-TSS (NM_001282128)	promoter-TSS (NM_001282128)	-520	NM_030178	78783	Mm.356059	NM_030178	ENSMUSG00000001632	Brpf1	4833438B11Rik|4930540D11Rik|Brpf2	bromodomain and PHD finger containing, 1	protein-coding
chr4	131450317	131450721	Intergenic	Intergenic	387759	NM_011214	19273	Mm.4860	NM_011214	ENSMUSG00000028909	Ptpru	Ftp-1|PCP-2|PTP|PTP-lambda|PTPlambda|Pcp2|Ptpf|Ptprl|R-PTP-U|R-PTP-psi|RPTPlambda	protein tyrosine phosphatase, receptor type, U	protein-coding
chr19	5786408	5786823	Intergenic	Intergenic	9366	NR_144621	109146451		NR_144621		Mascrna	-	Malat1-associated small cytoplasmic RNA	scRNA
chr14	14058358	14058917	intron (NM_139227, intron 4 of 11)	intron (NM_139227, intron 4 of 11)	46146	NM_139227	246103	Mm.133625	NM_139227	ENSMUSG00000021738	Atxn7	A430107N12Rik|AI627028|Sca7|ataxin-7	ataxin 7	protein-coding
chr11	60352349	60353380	promoter-TSS (NM_029044)	promoter-TSS (NM_029044)	41	NM_153080	216810	Mm.218875	NM_153080	ENSMUSG00000000538	Tom1l2	2900016I08Rik|A730055F12Rik|AU042072|Srebf1	target of myb1-like 2 (chicken)	protein-coding
chr16	5352125	5352570	Intergenic	Intergenic	-96391	NM_027446	70511	Mm.45780	NM_027446	ENSMUSG00000022544	Eef2kmt	5730409G15Rik|Fam86|Fam86a|eEF2-KMT	eukaryotic elongation factor 2 lysine methyltransferase	protein-coding
chr8	113634682	113635612	promoter-TSS (NM_173015)	promoter-TSS (NM_173015)	-439	NM_001048143	270096	Mm.74689	NM_173015	ENSMUSG00000078908	Mon1b	5031407H10|5033413H12Rik	MON1 homolog B, secretory traffciking associated	protein-coding
chr13	12340502	12341127	promoter-TSS (NM_033268)	promoter-TSS (NM_033268)	-82	NM_033268	11472	Mm.37638	NM_033268	ENSMUSG00000052374	Actn2	1110008F24Rik	actinin alpha 2	protein-coding
chr2	158624647	158625061	promoter-TSS (NM_175419)	promoter-TSS (NM_175419)	-59	NM_175419	109275	Mm.27747	NM_175419	ENSMUSG00000037761	Actr5	AA545173|B430109J19Rik	ARP5 actin-related protein 5	protein-coding
chr11	48523238	48523675	Intergenic	RMER17B|LTR|ERVK	-276904	NM_008143	14694	Mm.5305	NM_008143	ENSMUSG00000020372	Rack1	AL033335|GB-like|Gnb2-rs1|Gnb2l1|p205	receptor for activated C kinase 1	protein-coding
chr17	30612423	30612792	promoter-TSS (NM_025374)	promoter-TSS (NM_025374)	52	NM_001113560	109801	Mm.261984	NM_025374	ENSMUSG00000024026	Glo1	0610009E22Rik|1110008E19Rik|2510049H23Rik|AW550643|GLY1|Glo-1|Glo-1r|Glo-1s|Glo1-r|Glo1-s|Qglo	glyoxalase 1	protein-coding
chr14	36055710	36056117	Intergenic	Intergenic	-39052	NM_175008	218921	Mm.212464	NM_175008	ENSMUSG00000096405	4930474N05Rik	-	RIKEN cDNA 4930474N05 gene	protein-coding
chr13	53269614	53270076	intron (NM_013846, intron 1 of 8)	(CCCTAA)n|Simple_repeat|Simple_repeat	16279	NM_013846	26564	Mm.342774	NM_013846	ENSMUSG00000021464	Ror2	Ntrkr2	receptor tyrosine kinase-like orphan receptor 2	protein-coding
chr9	4376110	4376919	promoter-TSS (NM_145609)	promoter-TSS (NM_145609)	-38	NM_145609	78100	Mm.206549	NM_145609	ENSMUSG00000041124	Msantd4	8430410K20Rik|Mysantd4	Myb/SANT-like DNA-binding domain containing 4 with coiled-coils	protein-coding
chr14	8006021	8006206	intron (NM_001331064, intron 1 of 8)	(CCCTAA)n|Simple_repeat|Simple_repeat	3147	NM_001331064	66082	Mm.181473	NM_025341	ENSMUSG00000025277	Abhd6	0610041D24Rik|AA673485|AV065425	abhydrolase domain containing 6	protein-coding
chr2	34904941	34905426	intron (NM_028716, intron 6 of 14)	intron (NM_028716, intron 6 of 14)	8793	NM_028716	74016	Mm.65691	NM_028716	ENSMUSG00000026873	Phf19	3110009G19Rik|3321402G02Rik	PHD finger protein 19	protein-coding
chr4	44981179	44981679	promoter-TSS (NM_080289)	promoter-TSS (NM_080289)	35	NM_001312880	76238	Mm.196574	NM_080289	ENSMUSG00000035637	Grhpr	1110059D05Rik|6430629L09Rik|Glxr	glyoxylate reductase/hydroxypyruvate reductase	protein-coding
chr14	6575496	6576008	Intergenic	Lx8|LINE|L1	181305	NM_001309401	100041151	Mm.396155	NM_001309401	ENSMUSG00000091754	Gm3636	100042043	predicted gene 3636	protein-coding
chr1	105663461	105663946	promoter-TSS (NM_029349)	promoter-TSS (NM_029349)	-27	NM_013784	27392	Mm.268911	NM_013784	ENSMUSG00000056536	Pign	Gm20308|PIG-N	phosphatidylinositol glycan anchor biosynthesis, class N	protein-coding
chr19	46580097	46580561	intron (NM_053196, intron 1 of 11)	intron (NM_053196, intron 1 of 11)	6964	NM_053196	94279	Mm.296837	NM_053196	ENSMUSG00000025036	Sfxn2	C79732|F630107H02Rik	sideroflexin 2	protein-coding
chr6	128200346	128201168	Intergenic	CpG	-16954	NR_077223	330427	Mm.426356	NR_077223	ENSMUSG00000107879	9330102E08Rik	-	RIKEN cDNA 9330102E08 gene	ncRNA
chr1	24611699	24616121	Intergenic	Intergenic	-26473	NM_007733	12823	Mm.329196	NM_007733	ENSMUSG00000026141	Col19a1	-	collagen, type XIX, alpha 1	protein-coding
chr2	181930229	181930959	Intergenic	RLTR33|LTR|ERVK	-60632	NM_001205282	672125	Mm.489571	NM_001205282	ENSMUSG00000098505	Gm14496	-	predicted gene 14496	protein-coding
chr11	106036488	106037113	promoter-TSS (NM_027946)	promoter-TSS (NM_027946)	-72	NM_027946	71833	Mm.307455	NM_027946	ENSMUSG00000049354	Dcaf7	1700012F10Rik|2610037L01Rik|C86529|HAN11|Wdr68	DDB1 and CUL4 associated factor 7	protein-coding
chr5	132897389	132897785	Intergenic	ZP3AR|Satellite|Satellite	-354367	NM_001363480	319974	Mm.409595	NM_177047	ENSMUSG00000029673	Auts2	2700063G02Rik|A730011F23Rik|D830032G16Rik	autism susceptibility candidate 2	protein-coding
chr1	60369424	60369813	intron (NM_001313721, intron 5 of 11)	intron (NM_001313721, intron 5 of 11)	26318	NM_030013	77951	Mm.197640	NM_030013	ENSMUSG00000049439	Cyp20a1	A930011N14Rik|Cypm	cytochrome P450, family 20, subfamily a, polypeptide 1	protein-coding
chr10	130541931	130542458	Intergenic	Intergenic	-44815	NM_001103366	625131	Mm.469844	NM_001103366	ENSMUSG00000091511	Vmn2r87	EG625131	vomeronasal 2, receptor 87	protein-coding
chr10	80539045	80539422	promoter-TSS (NM_026094)	promoter-TSS (NM_026094)	-109	NM_026094	67331	Mm.52511	NM_026094	ENSMUSG00000003341	Atp8b3	1700042F02Rik|1700056N23Rik|ATPIK|SAPLT	ATPase, class I, type 8B, member 3	protein-coding
chr2	154790615	154791275	promoter-TSS (NM_023130)	promoter-TSS (NM_023130)	-165	NM_023130	19383	Mm.221440	NM_023130	ENSMUSG00000027593	Raly	AI663842|Merc	hnRNP-associated with lethal yellow	protein-coding
chr13	14063253	14063827	promoter-TSS (NM_010282)	promoter-TSS (NM_010282)	-52	NR_138553	14593	Mm.148039	NM_010282	ENSMUSG00000021302	Ggps1	1810026C22Rik|9530089B04Rik|AI843169|C79210	geranylgeranyl diphosphate synthase 1	protein-coding
chr7	92487219	92487701	Intergenic	Intergenic	-73689	NM_025515	66365	Mm.21173	NM_025515	ENSMUSG00000030613	Ccdc90b	2310015N07Rik|C86558	coiled-coil domain containing 90B	protein-coding
chr2	41896124	41896354	intron (NM_053011, intron 3 of 90)	(CCCTAA)n|Simple_repeat|Simple_repeat	551329	NR_105754	102465171		NR_105754	ENSMUSG00000098660	Mir6336	Gm27584|mmu-mir-6336	microRNA 6336	ncRNA
chr13	116192822	116193070	Intergenic	(CCCTAA)n|Simple_repeat|Simple_repeat	116742	NM_021459	16392	Mm.42242	NM_021459	ENSMUSG00000042258	Isl1	-	ISL1 transcription factor, LIM/homeodomain	protein-coding
chr11	62879264	62879922	exon (NM_026210, exon 1 of 7)	exon (NM_026210, exon 1 of 7)	138	NM_001356520	67510	Mm.9806	NM_026210	ENSMUSG00000014177	Tvp23b	1810036I24Rik|Fam18b|Fam18b1	trans-golgi network vesicle protein 23B	protein-coding
chr3	40550144	40550599	intron (NM_175515, intron 1 of 15)	intron (NM_175515, intron 1 of 15)	9604	NM_175515	380614	Mm.105309	NM_175515	ENSMUSG00000060798	Intu	9230116I04Rik|9430087H23Rik|Pdzd6|Pdzk6|mKIAA1284	inturned planar cell polarity protein	protein-coding
chr12	83520172	83520729	promoter-TSS (NM_030246)	promoter-TSS (NM_030246)	-16	NM_030246	73828	Mm.38238	NM_030246	ENSMUSG00000021222	Dcaf4	1110018E21Rik|Wdr21	DDB1 and CUL4 associated factor 4	protein-coding
chr17	44609807	44610032	intron (NM_001146038, intron 8 of 8)	(CAGCC)n|Simple_repeat|Simple_repeat	126257	NM_001271630	12393	Mm.391013	NM_009820	ENSMUSG00000039153	Runx2	AML3|Cbf|Cbfa-1|Cbfa1|LS3|Osf2|PEBP2aA|Pebp2a1|Pebpa2a	runt related transcription factor 2	protein-coding
chr19	44562569	44563166	promoter-TSS (NM_176958)	promoter-TSS (NM_176958)	13	NM_176958	319594	Mm.145278	NM_176958	ENSMUSG00000036450	Hif1an	2310046M24Rik|A830014H24Rik|FIH|FIH1	hypoxia-inducible factor 1, alpha subunit inhibitor	protein-coding
chr13	96572186	96572727	intron (NM_023420, intron 3 of 17)	intron (NM_023420, intron 3 of 17)	29721	NM_023420	68018	Mm.24125	NM_023420	ENSMUSG00000021669	Col4a3bp	2810404O15Rik|9230101K08Rik|AU016711|CERT|GPBP	collagen, type IV, alpha 3 (Goodpasture antigen) binding protein	protein-coding
chr6	95485036	95485264	intron (NM_011507, intron 10 of 10)	(CAGCC)n|Simple_repeat|Simple_repeat	-151157	NR_033559	414067	Mm.355990	NR_033559	ENSMUSG00000068180	AY512915	-	cDNA sequence AY512915	ncRNA
chr11	95336604	95337360	promoter-TSS (NM_172543)	promoter-TSS (NM_172543)	-36	NM_172543	215512	Mm.262113	NM_172543	ENSMUSG00000038893	Fam117a	5730593F17Rik|AW548096	family with sequence similarity 117, member A	protein-coding
chr8	11152651	11152970	Intergenic	C-rich|Low_complexity|Low_complexity	-143881	NM_001081212	384783	Mm.407207	NM_001081212	ENSMUSG00000038894	Irs2	Irs-2	insulin receptor substrate 2	protein-coding
chr13	65890491	65891318	Intergenic	Intergenic	-222549	NM_001177832	628709	Mm.390595	NM_001177832	ENSMUSG00000095909	Gm10324	-	predicted gene 10324	protein-coding
chr13	77438858	77439089	intron (NM_001145676, intron 19 of 19)	GSAT_MM|Satellite|Satellite	-269717	NM_001163419	68675	Mm.343005	NM_138312	ENSMUSG00000064138	Fam172a	1110033M05Rik|2610318O14Rik|53-E6|9430037D06Rik|AF064782|pEN87	family with sequence similarity 172, member A	protein-coding
chrX	153558384	153558712	promoter-TSS (NM_173367)	promoter-TSS (NM_173367)	-45	NM_173367	69361	Mm.46095	NM_173367	ENSMUSG00000048573	Cypt3	1700006H02Rik|Ckt1r1	cysteine-rich perinuclear theca 3	protein-coding
chr18	78198246	78198416	intron (NM_030683, intron 6 of 11)	(CCCTAA)n|Simple_repeat|Simple_repeat	8109	NM_001110274	27411	Mm.44158	NM_030683	ENSMUSG00000024552	Slc14a2	UT-A1|UT-A3	solute carrier family 14 (urea transporter), member 2	protein-coding
chr9	104895283	104895752	intron (NM_028719, intron 3 of 15)	intron (NM_028719, intron 3 of 15)	-157751	NM_001364513	94062	Mm.29746	NM_053159	ENSMUSG00000032563	Mrpl3	2010320L16Rik|5930422H18Rik|AA407889|L3mt	mitochondrial ribosomal protein L3	protein-coding
chr10	20459757	20459969	intron (NM_001347366, intron 2 of 11)	(CCCTAA)n|Simple_repeat|Simple_repeat	88465	NM_001347366	29863	Mm.425617	NM_013875	ENSMUSG00000019990	Pde7b	-	phosphodiesterase 7B	protein-coding
chr4	12906602	12907393	intron (NM_173746, intron 1 of 4)	CpG	160	NM_001171801	208820	Mm.12057	NM_173746	ENSMUSG00000055963	Triqk	C130086A10|Gm11818	triple QxxK/R motif containing	protein-coding
chr6	39420371	39420777	promoter-TSS (NM_001311109)	promoter-TSS (NM_001311109)	196	NR_152168	621427	Mm.389742	NR_152168	ENSMUSG00000068601	Gm10244	Anmkrn1	predicted gene 10244	ncRNA
chr4	31354114	31354529	Intergenic	L1Md_F3|LINE|L1	-609786	NM_172688	26409	Mm.258589	NM_009316	ENSMUSG00000028284	Map3k7	B430101B05|C87327|Tak1	mitogen-activated protein kinase kinase kinase 7	protein-coding
chr4	153175685	153176046	Intergenic	Intergenic	306965	NM_001099299	230959	Mm.318874	NM_001099299	ENSMUSG00000039546	Ajap1	Gm573	adherens junction associated protein 1	protein-coding
chr12	30922391	30922766	intron (NM_001289480, intron 2 of 8)	intron (NM_001289480, intron 2 of 8)	10909	NM_013709	24057	Mm.218624	NM_013709	ENSMUSG00000020669	Sh3yl1	AI314953|Ray|YSC84	Sh3 domain YSC-like 1	protein-coding
chr8	78213089	78213488	promoter-TSS (NM_183096)	promoter-TSS (NM_183096)	-54	NM_183096	73301	Mm.61243	NM_183096	ENSMUSG00000037101	Ttc29	1700031F13Rik	tetratricopeptide repeat domain 29	protein-coding
chrX	148865981	148866354	Intergenic	Intergenic	-16409	NM_001114383	434865	Mm.473681	NM_001114383	ENSMUSG00000079387	Luzp4	-	leucine zipper protein 4	protein-coding
chr5	73256524	73257193	promoter-TSS (NM_028194)	promoter-TSS (NM_028194)	-240	NM_028194	72313	Mm.260594	NM_028194	ENSMUSG00000070733	Fryl	2010313D22Rik|2310004H21Rik|2510002A14Rik|9030227G01Rik|mKIAA0826	FRY like transcription coactivator	protein-coding
chr3	152314698	152315068	intron (NM_001162375, intron 7 of 13)	(CA)n|Simple_repeat|Simple_repeat	25524	NM_001162375	215708	Mm.135018	NM_174868	ENSMUSG00000054942	Miga1	A930038D06|AI852168|C030011O14Rik|Fam73a|Mita1	mitoguardin 1	protein-coding
chr5	139506234	139506528	Intergenic	ZP3AR|Satellite|Satellite	-17370	NR_040701	74973	Mm.141282	NR_040701	ENSMUSG00000106056	4930500L23Rik	-	RIKEN cDNA 4930500L23 gene	ncRNA
chr7	29100990	29101504	intron (NM_009109, intron 20 of 105)	ZP3AR|Satellite|Satellite	-17553	NR_035489	100316710		NR_035489	ENSMUSG00000089219	Mir1963	mir-1963|mmu-mir-1963	microRNA 1963	ncRNA
chr3	122805284	122805747	intron (NM_153422, intron 11 of 20)	intron (NM_153422, intron 11 of 20)	-3535	NR_045168	71647	Mm.449992	NR_045168	ENSMUSG00000106583	4930447N08Rik	-	RIKEN cDNA 4930447N08 gene	ncRNA
chr1	7397664	7398361	Intergenic	CpG	309092	NM_183028	319263	Mm.21539	NM_183028	ENSMUSG00000051285	Pcmtd1	8430411F12Rik|A030012M09Rik	protein-L-isoaspartate (D-aspartate) O-methyltransferase domain containing 1	protein-coding
chr11	121204085	121204485	promoter-TSS (NM_001001333)	promoter-TSS (NM_001001333)	-148	NM_001001333	238023	Mm.275130	NM_001001333	ENSMUSG00000039307	Hexdc	BC069960|Hexd	hexosaminidase (glycosyl hydrolase family 20, catalytic domain) containing	protein-coding
chr3	32708274	32708687	promoter-TSS (NM_019673)	promoter-TSS (NM_019673)	-66	NM_019673	56456	Mm.41077	NM_019673	ENSMUSG00000027671	Actl6a	2810432C06Rik|AI851094|ARP4|Actl6|Baf53a|C79802	actin-like 6A	protein-coding
chr13	66291029	66291640	Intergenic	Intergenic	149784	NM_183119	76803	Mm.183391	NM_183119	ENSMUSG00000074832	2410141K09Rik	4930482J15Rik|Ayu21-35|Gt(pU21)35Imeg	RIKEN cDNA 2410141K09 gene	protein-coding
chr5	148191463	148192288	intron (NM_001359503, intron 4 of 14)	L1_Mur3|LINE|L1	-73342	NM_001359505	77521	Mm.244177	NM_029920	ENSMUSG00000029651	Mtus2	5730592G18Rik|A730013O20Rik|AU067634|C130038G02Rik|Cazip|Gm763|mKIAA0774	microtubule associated tumor suppressor candidate 2	protein-coding
chr10	31312993	31313927	promoter-TSS (NM_027168)	promoter-TSS (NM_027168)	55	NM_027168	69692	Mm.245537	NM_027168	ENSMUSG00000000295	Hddc2	2310057G13Rik	HD domain containing 2	protein-coding
chr14	74731841	74732508	promoter-TSS (NM_001285423)	promoter-TSS (NM_001285423)	-123	NM_001285423	13885	Mm.38055	NM_016903	ENSMUSG00000021996	Esd	Es-10|Es10|FGH|sid478	esterase D/formylglutathione hydrolase	protein-coding
chr5	15663306	15664153	Intergenic	Lx2A1|LINE|L1	-6670	NR_073011	381715	Mm.382859	NR_073011	ENSMUSG00000069720	4930572O03Rik	-	spermatogenesis associated glutamate (E)-rich protein pseudogene	pseudo
chr13	4608909	4609420	promoter-TSS (NM_018859)	promoter-TSS (NM_018859)	0	NM_018859	56043	Mm.251908	NM_018859	ENSMUSG00000045410	Akr1e1	1810061I10Rik|Akr1e2	aldo-keto reductase family 1, member E1	protein-coding
chr15	36555242	36555789	promoter-TSS (NM_001347022)	promoter-TSS (NM_001347022)	58	NM_001347022	66696	Mm.253627	NM_025712	ENSMUSG00000013611	Snx31	4631426E05Rik	sorting nexin 31	protein-coding
chr10	78413018	78413343	promoter-TSS (NM_010925)	promoter-TSS (NM_010925)	-137	NM_010925	18114	Mm.38344	NM_010925	ENSMUSG00000061032	Rrp1	AL033305|AL033306|AU018604|NNP-1|Nnp1	ribosomal RNA processing 1 homolog (S. cerevisiae)	protein-coding
chr5	107359376	107359737	intron (NM_054054, intron 11 of 18)	intron (NM_054054, intron 11 of 18)	28362	NM_001079873	114642	Mm.182836	NM_054054	ENSMUSG00000029279	Brdt	7420412D09Rik|Brd6|Fsrg3	bromodomain, testis-specific	protein-coding
chr2	131233497	131234342	promoter-TSS (NM_001206385)	promoter-TSS (NM_001206385)	-144	NM_144888	228607	Mm.287226	NM_144888	ENSMUSG00000037523	Mavs	D430028G21Rik|IPS-1|Visa|cardif	mitochondrial antiviral signaling protein	protein-coding
chr14	84171303	84171894	Intergenic	RMER6C|LTR|ERVK	-96308	NR_153783	102635012	Mm.399509	NR_153783	ENSMUSG00000115043	Gm32455	-	predicted gene, 32455	ncRNA
chrX	166479620	166479957	promoter-TSS (NM_019773)	promoter-TSS (NM_019773)	79	NM_019773	56382	Mm.25306	NM_019773	ENSMUSG00000079316	Rab9	2410064E05Rik|AI195561|Rab9a|Sid6061p	RAB9, member RAS oncogene family	protein-coding
chr10	93168205	93168500	intron (NM_146239, intron 1 of 16)	intron (NM_146239, intron 1 of 16)	5567	NR_035452	100316689		NR_035452	ENSMUSG00000089214	Mir1931	mir-1931|mmu-mir-1931	microRNA 1931	ncRNA
chr10	121476163	121476671	promoter-TSS (NM_138956)	promoter-TSS (NM_138956)	-167	NM_138956	192678	Mm.41265	NM_138956	ENSMUSG00000025795	Rassf3	AW212023|AW322379	Ras association (RalGDS/AF-6) domain family member 3	protein-coding
chr11	23255492	23255969	promoter-TSS (NM_134014)	promoter-TSS (NM_134014)	-311	NM_001035226	103573	Mm.217547	NM_134014	ENSMUSG00000020290	Xpo1	AA420417|Crm1|Exp1	exportin 1	protein-coding
chr9	25400847	25401213	Intergenic	RLTR26|LTR|ERVK	-80567	NM_026189	67484	Mm.112977	NM_026189	ENSMUSG00000036611	Eepd1	2310005P05Rik|AI481005	endonuclease/exonuclease/phosphatase family domain containing 1	protein-coding
chr12	100527802	100528050	Intergenic	Intergenic	-7104	NM_001033213	104718	Mm.295441	NM_001033213	ENSMUSG00000033530	Ttc7b	AA408451|Ttc7l1	tetratricopeptide repeat domain 7B	protein-coding
chr8	106337793	106338411	promoter-TSS (NM_021491)	promoter-TSS (NM_021491)	-137	NM_021491	58994	Mm.23298	NM_021491	ENSMUSG00000031906	Smpd3	4631433G07Rik|AI427456|AW537966|fro|nSMase2	sphingomyelin phosphodiesterase 3, neutral	protein-coding
chr5	139898171	139898493	Intergenic	ZP3AR|Satellite|Satellite	-9611	NM_175522	243312	Mm.237102	NM_175522	ENSMUSG00000048988	Elfn1	A930017N06Rik|AI197272|Ppp1r28	leucine rich repeat and fibronectin type III, extracellular 1	protein-coding
chr10	115092771	115093290	intron (NM_173391, intron 8 of 10)	intron (NM_173391, intron 8 of 10)	91992	NM_173391	216343	Mm.31597	NM_173391	ENSMUSG00000006764	Tph2	AU043594|Ntph	tryptophan hydroxylase 2	protein-coding
chr1	151011052	151011322	Intergenic	Intergenic	-17752	NM_001024720	545370	Mm.379425	NM_001024720	ENSMUSG00000066842	Hmcn1	EG545370|FIBL-6|Gm201	hemicentin 1	protein-coding
chr16	11143915	11144284	intron (NR_027502, intron 19 of 22)	LSU-rRNA_Hsa|rRNA|rRNA	-9567	NM_029582	106200	Mm.291015	NM_029582	ENSMUSG00000022498	Txndc11	2810408E11Rik|AI427833|EFP1|Txdc11	thioredoxin domain containing 11	protein-coding
chr5	148046662	148047027	intron (NM_029920, intron 1 of 14)	GA-rich|Low_complexity|Low_complexity	89524	NM_029920	77521	Mm.244177	NM_029920	ENSMUSG00000029651	Mtus2	5730592G18Rik|A730013O20Rik|AU067634|C130038G02Rik|Cazip|Gm763|mKIAA0774	microtubule associated tumor suppressor candidate 2	protein-coding
chr19	46761062	46761715	promoter-TSS (NM_001102471)	promoter-TSS (NM_001102471)	-221	NM_001102471	94219	Mm.306903	NM_033569	ENSMUSG00000064105	Cnnm2	AU015877|AW048635|Acdp2|Clp2	cyclin M2	protein-coding
chr5	146895419	146896189	Intergenic	MTD|LTR|ERVL-MaLR	50733	NM_026864	68895	Mm.266978	NM_026864	ENSMUSG00000029641	Rasl11a	1110065D03Rik|AI852031	RAS-like, family 11, member A	protein-coding
chr10	62549607	62550125	Intergenic	C-rich|Low_complexity|Low_complexity	-22421	NM_001358965	19073	Mm.338790	NM_011157	ENSMUSG00000020077	Srgn	Prg|Prg1|Sgc	serglycin	protein-coding
chr13	113983658	113983982	intron (NM_172595, intron 4 of 4)	intron (NM_172595, intron 4 of 4)	167772	NR_045836	319803	Mm.386896	NM_177004	ENSMUSG00000114213	A430090L17Rik	-	RIKEN cDNA A430090L17 gene	ncRNA
chr13	107831207	107831541	intron (NM_145456, intron 5 of 17)	intron (NM_145456, intron 5 of 17)	58690	NM_145456	67263	Mm.490418	NM_145456		Zswim6	2900036G02Rik|mKIAA1577	zinc finger SWIM-type containing 6	protein-coding
chr16	3846755	3847536	promoter-TSS (NM_001081217)	promoter-TSS (NM_001081217)	-78	NM_001081217	385674	Mm.244261	NM_001081217	ENSMUSG00000054939	Zfp174	Gm1754	zinc finger protein 174	protein-coding
chr7	16181030	16181252	intron (NR_102730, intron 6 of 12)	ZP3AR|Satellite|Satellite	5746	NM_001277988	17537	Mm.360516	NM_008627	ENSMUSG00000041420	Meis3	AI573393|Mrg2	Meis homeobox 3	protein-coding
chr15	79546562	79547019	promoter-TSS (NM_199080)	promoter-TSS (NM_199080)	-49	NM_199079	67040	Mm.29644	NM_152806	ENSMUSG00000055065	Ddx17	2610007K22Rik|A430025E01Rik|AI047725|C80929|Gm926|p72	DEAD (Asp-Glu-Ala-Asp) box polypeptide 17	protein-coding
chr2	25262197	25262804	promoter-TSS (NM_175286)	promoter-TSS (NM_175286)	-98	NM_175286	97031	Mm.308539	NM_175286	ENSMUSG00000048707	Tprn	C430004E15Rik|C87750	taperin	protein-coding
chr2	152390956	152391456	Intergenic	Intergenic	6840	NM_011438	20667	Mm.28424	NM_011438	ENSMUSG00000051817	Sox12	2010205A02Rik	SRY (sex determining region Y)-box 12	protein-coding
chr14	105289460	105290321	intron (NM_001190989, intron 2 of 7)	(AGTAG)n|Simple_repeat|Simple_repeat	31267	NM_029561	76273	Mm.290669	NM_029561	ENSMUSG00000053253	Ndfip2	0710001O20Rik|2810436B12Rik|9130207N19Rik|N4wbp5a|mKIAA1165	Nedd4 family interacting protein 2	protein-coding
chr14	33589054	33589657	promoter-TSS (NM_008978)	promoter-TSS (NM_008978)	85	NM_008978	19256	Mm.8019	NM_008978	ENSMUSG00000021940	Ptpn20	typ	protein tyrosine phosphatase, non-receptor type 20	protein-coding
chr17	9484094	9484855	Intergenic	Intergenic	185230	NM_001163836	67543	Mm.26987	NM_026226	ENSMUSG00000046173	Pabpc6	4932702K14Rik|AI428050|Pabpc3	poly(A) binding protein, cytoplasmic 6	protein-coding
chr13	73503178	73503538	intron (NM_001368681, intron 7 of 12)	intron (NM_001368681, intron 7 of 12)	-33389	NM_010020	13162	Mm.41993	NM_010020	ENSMUSG00000021609	Slc6a3	DAT|Dat1	solute carrier family 6 (neurotransmitter transporter, dopamine), member 3	protein-coding
chr12	78941122	78941481	Intergenic	(CTGTG)n|Simple_repeat|Simple_repeat	-34363	NM_013738	27260	Mm.103380	NM_013738	ENSMUSG00000021118	Plek2	-	pleckstrin 2	protein-coding
chr4	101647088	101647701	promoter-TSS (NM_175036)	promoter-TSS (NM_175036)	-389	NM_175036	230514	Mm.4756	NM_175036	ENSMUSG00000035212	Leprot	LEPR|OB-RGRP|Obrgrp|VPS55	leptin receptor overlapping transcript	protein-coding
chr4	146067062	146067837	promoter-TSS (NR_030771)	promoter-TSS (NR_030771)	-75	NR_030771	627585	Mm.424988	NM_001039233		Gm13034	-	SWI/SNF related, matrix associated, actin dependent regulator of chromatin, subfamily a, member 5 pseudogene	pseudo
chr7	139020966	139021261	intron (NM_028708, intron 7 of 19)	CpG	-64888	NM_011993	26757	Mm.250414	NM_011993	ENSMUSG00000025478	Dpysl4	AI173505|CRMP-3|Crmp3|DPY4|Drp-4|Ulip4	dihydropyrimidinase-like 4	protein-coding
chr5	144965039	144965365	intron (NM_001038627, intron 1 of 17)	CpG	628	NM_029438	75788	Mm.27735	NM_029438	ENSMUSG00000038780	Smurf1	4930431E10Rik|mKIAA1625	SMAD specific E3 ubiquitin protein ligase 1	protein-coding
chr5	110057816	110058475	Intergenic	Intergenic	-41824	NM_207279	403178	Mm.297057	NM_207279	ENSMUSG00000064247	Plcxd1	A330045H12Rik|Gm576	phosphatidylinositol-specific phospholipase C, X domain containing 1	protein-coding
chr16	32079004	32079618	promoter-TSS (NM_177326)	promoter-TSS (NM_177326)	31	NM_177326	224105	Mm.234204	NM_177326	ENSMUSG00000022781	Pak2	5330420P17Rik|A130002K10Rik|AI836325|D16Ertd269e|PAK-2|mKIAA4182	p21 (RAC1) activated kinase 2	protein-coding
chr14	61172483	61173160	intron (NM_172809, intron 2 of 9)	CpG	34364	NM_172809	50720	Mm.440703	NM_015788	ENSMUSG00000048279	Sacs	A230052M14|DNAJC29|E130115J16Rik	sacsin	protein-coding
chr19	44487276	44487786	Intergenic	RMER1B|Other|Other	-5941	NM_011720	22423	Mm.88365	NM_011720	ENSMUSG00000036961	Wnt8b	-	wingless-type MMTV integration site family, member 8B	protein-coding
chr6	144570956	144571247	Intergenic	(CTCCG)n|Simple_repeat|Simple_repeat	-101767	NR_040519	66760	Mm.233631	NR_040519	ENSMUSG00000085785	Sox5os3	4933425H06Rik	SRY (sex determining region Y)-box 5, opposite strand 3	ncRNA
chr5	135632469	135632887	promoter-TSS (NM_001357037)	promoter-TSS (NM_001357037)	24	NM_146002	215160	Mm.295438	NM_031398	ENSMUSG00000039917	Rhbdd2	0610011L13Rik|AI480532|Rhbdl7|Usmg1	rhomboid domain containing 2	protein-coding
chr12	91293043	91293583	intron (NM_181815, intron 13 of 25)	intron (NM_181815, intron 13 of 25)	91096	NM_181815	75216	Mm.312204	NM_181815	ENSMUSG00000061533	Cep128	4930534B04Rik|5430424K18Rik|AI449708|AI480494|E230024F20	centrosomal protein 128	protein-coding
chr2	10153301	10153818	promoter-TSS (NM_172471)	promoter-TSS (NM_172471)	16	NM_172471	209378	Mm.313876	NM_172471	ENSMUSG00000025780	Itih5	4631408O11Rik|5430408M01Rik|E130106B02	inter-alpha (globulin) inhibitor H5	protein-coding
chr5	70842237	70842500	5' UTR (NM_010252, exon 1 of 9)	5' UTR (NM_010252, exon 1 of 9)	249	NM_010252	14405	Mm.255292	NM_010252	ENSMUSG00000001260	Gabrg1	GabaA|GabaA/BZ	gamma-aminobutyric acid (GABA) A receptor, subunit gamma 1	protein-coding
chr11	54140076	54140288	Intergenic	B2_Mm1t|SINE|B2	39258	NM_011031	18452	Mm.3705	NM_011031	ENSMUSG00000018906	P4ha2	AA407196|C76437|P4hl	procollagen-proline, 2-oxoglutarate 4-dioxygenase (proline 4-hydroxylase), alpha II polypeptide	protein-coding
chr5	117348305	117348674	intron (NM_001033311, intron 7 of 9)	intron (NM_001033311, intron 7 of 9)	-8816	NM_021539	59043	Mm.28489	NM_021539	ENSMUSG00000029364	Wsb2	AA673511|Swip2|WSB-2	WD repeat and SOCS box-containing 2	protein-coding
chr8	16686093	16686491	intron (NM_053171, intron 5 of 69)	intron (NM_053171, intron 5 of 69)	-517454	NR_037214	100526464		NR_037214	ENSMUSG00000093142	Mir3106	mir-3106|mmu-mir-3106	microRNA 3106	ncRNA
chr3	153173577	153173894	Intergenic	GA-rich|Low_complexity|Low_complexity	-21627	NR_108044	75001		NR_108044		4930482G09Rik	-	RIKEN cDNA 4930482G09 gene	ncRNA
chr19	3388150	3388930	promoter-TSS (NM_001286557)	promoter-TSS (NM_001286557)	-317	NM_001039658	17771	Mm.209941	NM_010841	ENSMUSG00000024905	Tesmin	Mtl5	testis expressed metallothionein like	protein-coding
chr2	29638599	29639185	intron (NM_001039087, intron 1 of 25)	(TCCTG)n|Simple_repeat|Simple_repeat	19172	NM_001039086	107746	Mm.298274	NM_054050	ENSMUSG00000039844	Rapgef1	4932418O06Rik|C3G|Grf2	Rap guanine nucleotide exchange factor (GEF) 1	protein-coding
chr10	77864252	77864830	intron (NM_001287074, intron 2 of 11)	intron (NM_001287074, intron 2 of 11)	2566	NM_001101631	100041351	Mm.441672	NM_001101631	ENSMUSG00000111915	Gm3285	-	predicted gene 3285	protein-coding
chr15	37176058	37176609	Intergenic	Intergenic	-56703	NM_026496	252973	Mm.244612	NM_026496	ENSMUSG00000022286	Grhl2	0610015A08Rik|BOM|Tcfcp2l3|clft3	grainyhead like transcription factor 2	protein-coding
chr7	27507867	27508464	intron (NM_198048, intron 5 of 6)	CpG-12884	8841	NM_198048	19153	Mm.10119	NM_019412	ENSMUSG00000053198	Prx	L-Periaxin	periaxin	protein-coding
chr2	125766270	125766778	intron (NM_001369056, intron 2 of 12)	intron (NM_001369056, intron 2 of 12)	1462	NM_001369056	70354	Mm.138091	NM_133725	ENSMUSG00000035093	Secisbp2l	3110001I20Rik|AI504340|C630011I23	SECIS binding protein 2-like	protein-coding
chr3	37419478	37419991	promoter-TSS (NM_001163511)	promoter-TSS (NM_001163511)	-138	NM_153561	229228	Mm.436967	NM_153561	ENSMUSG00000050174	Nudt6	Asfgf2b	nudix (nucleoside diphosphate linked moiety X)-type motif 6	protein-coding
chrY	90783665	90784304	Intergenic	Intergenic	-1458	NM_133362	170942	Mm.76062	NM_133362	ENSMUSG00000096768	Erdr1	edr	erythroid differentiation regulator 1	protein-coding
chr17	56325577	56326049	promoter-TSS (NM_172132)	promoter-TSS (NM_172132)	-237	NM_001357909	193796	Mm.45047	NM_172132	ENSMUSG00000024201	Kdm4b	4732474L06Rik|Jmjd2b	lysine (K)-specific demethylase 4B	protein-coding
chr7	44433336	44433817	Intergenic	ZP3AR|Satellite|Satellite	-8911	NM_198250	272381	Mm.44173	NM_198250	ENSMUSG00000047085	Lrrc4b	A830007M12|Lrig4	leucine rich repeat containing 4B	protein-coding
chr17	21423059	21423607	5' UTR (NM_011760, exon 1 of 4)	5' UTR (NM_011760, exon 1 of 4)	106	NM_011760	22712	Mm.12916	NM_011760	ENSMUSG00000023882	Zfp54	2810034D10Rik|KRAB10|Zfp-54|Zfp76|mszf83	zinc finger protein 54	protein-coding
chr2	75704397	75704974	promoter-TSS (NM_010902)	promoter-TSS (NM_010902)	-22	NR_132727	18024	Mm.1025	NM_010902	ENSMUSG00000015839	Nfe2l2	Nrf2	nuclear factor, erythroid derived 2, like 2	protein-coding
chr6	17098380	17098906	intron (NM_207176, intron 4 of 6)	Lx8|LINE|L1	33494	NM_207176	21753	Mm.436548	NM_011570	ENSMUSG00000029552	Tes	D6Ertd352e|TESS|Tes1|Tes2|testin2	testis derived transcript	protein-coding
chr2	3543364	3543587	Intergenic	ORR1B2|LTR|ERVL-MaLR	30410	NM_177647	227526	Mm.211455	NM_177647	ENSMUSG00000039496	Cdnf	9330140G23|Armetl1	cerebral dopamine neurotrophic factor	protein-coding
chr17	68003863	68004387	promoter-TSS (NM_172964)	promoter-TSS (NM_172964)	-17	NM_172964	268970	Mm.9935	NM_172964	ENSMUSG00000024043	Arhgap28	AU044757|AW550892|E130310N06	Rho GTPase activating protein 28	protein-coding
chr2	36044863	36045249	intron (NM_026703, intron 1 of 3)	intron (NM_026703, intron 1 of 3)	4282	NM_026703	68375	Mm.19834	NM_026703	ENSMUSG00000026895	Ndufa8	0610033L03Rik|AW261656|CI-19kD|CI-PGIV	NADH:ubiquinone oxidoreductase subunit A8	protein-coding
chr13	62571006	62571370	Intergenic	Intergenic	-12559	NM_175252	77117	Mm.440905	NM_175252	ENSMUSG00000074865	Zfp934	6720457D02Rik	zinc finger protein 934	protein-coding
chr2	121522407	121522668	intron (NM_001290987, intron 4 of 11)	(TTAGGG)n|Simple_repeat|Simple_repeat	14044	NM_001369185	241627	Mm.293284	NM_030234	ENSMUSG00000027242	Wdr76	5830411K18Rik|6030457D09|AA517836	WD repeat domain 76	protein-coding
chr13	66490642	66491050	Intergenic	ORR1A4|LTR|ERVL-MaLR	-49728	NM_001290196	76803	Mm.183391	NM_183119	ENSMUSG00000074832	2410141K09Rik	4930482J15Rik|Ayu21-35|Gt(pU21)35Imeg	RIKEN cDNA 2410141K09 gene	protein-coding
chr7	80803137	80803739	promoter-TSS (NM_016721)	promoter-TSS (NM_016721)	-107	NM_016721	29875	Mm.207619	NM_016721	ENSMUSG00000030536	Iqgap1	AA682088|D7Ertd237e|D7Ertd257e|mKIAA0051	IQ motif containing GTPase activating protein 1	protein-coding
chr8	60992666	60993760	promoter-TSS (NM_001293637)	promoter-TSS (NM_001293637)	20	NM_001293638	18004	Mm.486881	NM_175089	ENSMUSG00000031644	Nek1	D8Ertd790e|kat	NIMA (never in mitosis gene a)-related expressed kinase 1	protein-coding
chr7	113513229	113513909	promoter-TSS (NM_001285831)	promoter-TSS (NM_001285831)	-265	NM_001360668	67420	Mm.206919	NM_026143	ENSMUSG00000030759	Far1	2600011M19Rik|2900034E22Rik|3732409C05Rik|AI850429|Mlstd2	fatty acyl CoA reductase 1	protein-coding
chr11	104685542	104686269	Intergenic	Intergenic	77905	NM_016780	16416	Mm.87150	NM_016780	ENSMUSG00000020689	Itgb3	CD61|GP3A|INGRB3	integrin beta 3	protein-coding
chr9	21917955	21918540	promoter-TSS (NM_001324531)	promoter-TSS (NM_001324531)	-64	NM_031874	19340	Mm.260157	NM_031874	ENSMUSG00000019066	Rab3d	C130057E11Rik	RAB3D, member RAS oncogene family	protein-coding
chr14	75396506	75397004	Intergenic	B3A|SINE|B2	-8609	NR_030568	100124475		NR_030568	ENSMUSG00000077981	Mir466f-3	Mirn466f-3	microRNA 466f-3	ncRNA
chr16	94675874	94677250	intron (NM_001113389, intron 8 of 11)	intron (NM_001113389, intron 8 of 11)	65143	NM_001347731	13548	Mm.310973	NM_007890	ENSMUSG00000022897	Dyrk1a	2310043O08Rik|D16Ertd272e|D16Ertd493e|Dyrk|Gm10783|Mnbh|Mp86|mmb	dual-specificity tyrosine-(Y)-phosphorylation regulated kinase 1a	protein-coding
chr11	78115258	78115884	promoter-TSS (NM_001364110)	promoter-TSS (NM_001364110)	-55	NM_001364110	216971	Mm.119387	NM_145430	ENSMUSG00000037750	Fam222b	9630020I17Rik	family with sequence similarity 222, member B	protein-coding
chr14	121447007	121447463	Intergenic	Intergenic	58019	NM_053079	56643	Mm.155618	NM_053079	ENSMUSG00000025557	Slc15a1	D630032F02|PECT1|PEPT1	solute carrier family 15 (oligopeptide transporter), member 1	protein-coding
chr16	92571236	92571603	Intergenic	ORR1B1|LTR|ERVL-MaLR	73272	NM_172469	209195	Mm.44747	NM_172469	ENSMUSG00000022949	Clic6	5730466J16Rik|AL022908|AW045520|CLIC1L	chloride intracellular channel 6	protein-coding
chr11	100939213	100939921	promoter-TSS (NM_213660)	promoter-TSS (NM_213660)	-27	NM_011486	20848	Mm.249934	NM_011486	ENSMUSG00000004040	Stat3	1110034C02Rik|AW109958|Aprf	signal transducer and activator of transcription 3	protein-coding
chr14	3413501	3413821	intron (NR_033117, intron 1 of 5).2	intron (NR_033117, intron 1 of 5).2	1047	NR_033121	100041530	Mm.444311	NR_033121	ENSMUSG00000096488	Gm10409	EG666890|Gm8348	predicted pseudogene 8348	pseudo
chr7	34474563	34474950	Intergenic	ZP3AR|Satellite|Satellite	-85051	NM_025948	67070	Mm.276503	NM_025948	ENSMUSG00000066568	Lsm14a	2700023B17Rik|AA407828|AU017544|Tral|mRAP55A	LSM14A mRNA processing body assembly factor	protein-coding
chr5	115652888	115653301	non-coding (NR_151600, exon 1 of 4)	non-coding (NR_151600, exon 1 of 4)	492	NR_151602	75665	Mm.233914	NM_001080808	ENSMUSG00000041609	Bicdl1	2210403N09Rik|BICDR-1|Ccdc64	BICD family like cargo adaptor 1	protein-coding
chr13	6547273	6548281	promoter-TSS (NM_145131)	promoter-TSS (NM_145131)	-380	NM_145131	69617	Mm.41933	NM_145131	ENSMUSG00000021193	Pitrm1	2310012C15Rik|AA410010|MP-1|MP1|Ntup1|PreP|mKIAA1104	pitrilysin metallepetidase 1	protein-coding
chr17	37028581	37028969	Intergenic	Intergenic	-5377	NM_010814	17441	Mm.210857	NM_010814	ENSMUSG00000076439	Mog	B230317G11Rik	myelin oligodendrocyte glycoprotein	protein-coding
chr17	56078988	56079668	promoter-TSS (NM_001331053)	promoter-TSS (NM_001331053)	5	NM_024432	66530	Mm.28000	NM_024432	ENSMUSG00000019578	Ubxn6	1200008L11Rik|2210415J11Rik|AU040909|Ubxd1|Ubxdc2	UBX domain protein 6	protein-coding
chr4	86748281	86748583	promoter-TSS (NM_184088)	promoter-TSS (NM_184088)	-123	NM_184088	329877	Mm.273718	NM_184088	ENSMUSG00000038024	Dennd4c	1700065A05Rik|AA420392	DENN/MADD domain containing 4C	protein-coding
chr8	14038442	14038826	intron (NM_001034862, intron 3 of 5)	intron (NM_001034862, intron 3 of 5)	39694	NR_131136	546036	Mm.31785	NR_131136	ENSMUSG00000110058	Gm5907	EG546036|Gm45519|Gm845	predicted gene 5907	ncRNA
chr5	134648781	134649216	Intergenic	ZP3AR|Satellite|Satellite	-9589	NM_001312867	22384	Mm.27955	NM_033561	ENSMUSG00000040731	Eif4h	AU018978|D5Ertd355e|E430026L18Rik|Ef4h|Wbscr1|Wscr1|eIF-4H	eukaryotic translation initiation factor 4H	protein-coding
chr19	58762281	58762918	intron (NM_011128, intron 4 of 11)	intron (NM_011128, intron 4 of 11)	2876	NM_011128	18947	Mm.212333	NM_011128	ENSMUSG00000025091	Pnliprp2	PLRP2	pancreatic lipase-related protein 2	protein-coding
chr8	23237316	23238062	promoter-TSS (NM_024240)	promoter-TSS (NM_024240)	-21	NM_024240	109145	Mm.27945	NM_024240	ENSMUSG00000031546	Gins4	2810037C03Rik|4933405K01Rik|Sld5	GINS complex subunit 4 (Sld5 homolog)	protein-coding
chr6	47758571	47759049	Intergenic	RMER12B|LTR|ERVK	-5885	NR_002841	19799		NR_002841		Rn4.5s	-	4.5S RNA	rRNA
chr18	78165313	78165764	intron (NM_207651, intron 12 of 21)	intron (NM_207651, intron 12 of 21)	13634	NM_001110273	27411	Mm.44158	NM_030683	ENSMUSG00000024552	Slc14a2	UT-A1|UT-A3	solute carrier family 14 (urea transporter), member 2	protein-coding
chr14	25832293	25832835	Intergenic	Intergenic	-9591	NM_013469	11744	Mm.294083	NM_013469	ENSMUSG00000021866	Anxa11	A830099O17Rik|Anx11	annexin A11	protein-coding
chr5	109690537	109691155	Intergenic	Intergenic	-131853	NM_001164735	57914	Mm.35771	NM_016715	ENSMUSG00000033467	Crlf2	CRLM2|Ly114|Tpte2|Tslpr	cytokine receptor-like factor 2	protein-coding
chr13	24693305	24693672	intron (NM_178658, intron 9 of 13)	B4|SINE|B4	-47733	NM_001370932	666145	Mm.390564	NM_001370932	ENSMUSG00000085861	Armh2	1700016G14Rik	armadillo-like helical domain containing 2	protein-coding
chr18	56562133	56562652	promoter-TSS (NM_001162989)	promoter-TSS (NM_001162989)	-94	NM_138600	110695	Mm.30250	NM_138600	ENSMUSG00000053644	Aldh7a1	Atq1|D18Wsu181e	aldehyde dehydrogenase family 7, member A1	protein-coding
chr2	170890659	170890906	Intergenic	Intergenic	158975	NM_029761	76829	Mm.41633	NM_029761	ENSMUSG00000027560	Dok5	2700055C10Rik	docking protein 5	protein-coding
chr8	23624864	23625113	Intergenic	ORR1F|LTR|ERVL-MaLR	-44673	NM_177086	320158	Mm.121274	NM_177086	ENSMUSG00000037492	Zmat4	9630048M01Rik	zinc finger, matrin type 4	protein-coding
chr11	23124383	23124816	Intergenic	(CCCCG)n|Simple_repeat|Simple_repeat	-27541	NR_131065	76993	Mm.59224	NR_131065	ENSMUSG00000086366	1700061J23Rik	-	RIKEN cDNA 1700061J23 gene	ncRNA
chr10	81320224	81320979	promoter-TSS (NM_027381)	promoter-TSS (NM_027381)	-502	NM_027381	70312	Mm.87628	NM_027381	ENSMUSG00000034889	Cactin	2510012J08Rik	cactin, spliceosome C complex subunit	protein-coding
chr2	59841218	59841879	intron (NM_198294, intron 25 of 26)	intron (NM_198294, intron 25 of 26)	41058	NM_028118	72137	Mm.288734	NM_028118	ENSMUSG00000026988	Wdsub1	1700048E19Rik|2610014F08Rik	WD repeat, SAM and U-box domain containing 1	protein-coding
chr8	25066497	25067251	intron (NM_031257, intron 3 of 11)	(CTGTG)n|Simple_repeat|Simple_repeat	-27912	NM_001081187	330723	Mm.334452	NM_001081187	ENSMUSG00000037406	Htra4	B430206E18Rik	HtrA serine peptidase 4	protein-coding
chrX	148180450	148181158	promoter-TSS (NM_011022)	promoter-TSS (NM_011022)	80	NM_011022	18422	Mm.420007	NM_011022	ENSMUSG00000094885	Ott	AV272316	ovary testis transcribed	protein-coding
chr14	60494234	60494622	Intergenic	C-rich|Low_complexity|Low_complexity	116736	NM_001164705	72125	Mm.275499	NM_028113	ENSMUSG00000021986	Amer2	2600011E07Rik|Fam123a	APC membrane recruitment 2	protein-coding
chr5	21250404	21250777	intron (NM_001359876, intron 14 of 29)	intron (NM_001359876, intron 14 of 29)	64323	NM_175437	212167	Mm.121705	NM_175437	ENSMUSG00000039934	Gsap	A530088I07Rik|Pion	gamma-secretase activating protein	protein-coding
chr5	63968790	63969221	promoter-TSS (NM_145923)	promoter-TSS (NM_145923)	-108	NM_145923	100532	Mm.243632	NM_145923	ENSMUSG00000047881	Rell1	AA536743	RELT-like 1	protein-coding
chr1	115538127	115538669	Intergenic	Lx2B|LINE|L1	-146339	NM_001371013
chr2	33130511	33131551	promoter-TSS (NM_001355200)	promoter-TSS (NM_001355200)	405	NM_001355201	99326	Mm.41290	NM_178888	ENSMUSG00000038860	Garnl3	AW120551	GTPase activating RANGAP domain-like 3	protein-coding
chr12	113335352	113335526	Intergenic	Intergenic	149536	NM_153776	69195	Mm.313244	NM_153776	ENSMUSG00000049036	Tmem121	2410008J05Rik|Hole	transmembrane protein 121	protein-coding
chr5	124095703	124096317	promoter-TSS (NM_019875)	promoter-TSS (NM_019875)	-212	NM_019875	56325	Mm.254839	NM_019875	ENSMUSG00000029408	Abcb9	TAPL|mKIAA1520	ATP-binding cassette, sub-family B (MDR/TAP), member 9	protein-coding
chr7	98682742	98683162	non-coding (NR_144495, exon 1 of 1)	non-coding (NR_144495, exon 1 of 1)	19976	NR_144495	100040769	Mm.126401	NR_144495		Gm15506	-	predicted gene 15506	ncRNA
chr12	105032365	105032775	promoter-TSS (NM_028419)	promoter-TSS (NM_028419)	-48	NM_028419	73046	Mm.29128	NM_028419	ENSMUSG00000021102	Glrx5	-	glutaredoxin 5	protein-coding
chr17	56540371	56540945	Intergenic	(CA)n|Simple_repeat|Simple_repeat	13729	NR_130128	100504425	Mm.384143	NR_130128	ENSMUSG00000110218	Gm20219	Tincr	predicted gene, 20219	ncRNA
chr10	62486802	62487061	promoter-TSS (NM_001113355)	promoter-TSS (NM_001113355)	-126	NM_001358543	30930	Mm.260703	NM_133672	ENSMUSG00000020078	Vps26a	AA407240|HB58|Vps26	VPS26 retromer complex component A	protein-coding
chr4	147113914	147114510	Intergenic	Intergenic	-45776	NR_045446	71270	Mm.460830	NR_045446	ENSMUSG00000093617	4933438K21Rik	-	RIKEN cDNA 4933438K21 gene	ncRNA
chr7	136894268	136894819	promoter-TSS (NM_008598)	promoter-TSS (NM_008598)	-68	NM_008598	17314	Mm.440219	NM_008598	ENSMUSG00000054612	Mgmt	AGT|AI267024|Agat	O-6-methylguanine-DNA methyltransferase	protein-coding
chr17	84127116	84127584	Intergenic	Intergenic	48690	NR_045458	74473	Mm.399575	NR_045458	ENSMUSG00000117571	4933433H22Rik	-	RIKEN cDNA 4933433H22 gene	ncRNA
chr11	68691376	68692153	promoter-TSS (NM_175260)	promoter-TSS (NM_175260)	-151	NM_175260	77579	Mm.218233	NM_175260	ENSMUSG00000020900	Myh10	5730504C04Rik|9330167F11Rik|Fltn|Myhn-2|Myhn2|NMHC II-B|NMHC-B|NMHCII-B|NMMHC II-b|NMMHC-B|NMMHC-IIB|SMemb|mKIAA3005	myosin, heavy polypeptide 10, non-muscle	protein-coding
chr19	34527264	34527684	promoter-TSS (NM_021460)	promoter-TSS (NM_021460)	0	NM_021460	16889	Mm.157545	NM_021460	ENSMUSG00000024781	Lipa	AA960673|Lal|Lip-1|Lip1	lysosomal acid lipase A	protein-coding
chr7	3644409	3645297	promoter-TSS (NM_146176)	promoter-TSS (NM_146176)	-416	NM_146176	232791	Mm.358731	NM_146176	ENSMUSG00000035632	Cnot3	A930039N10Rik	CCR4-NOT transcription complex, subunit 3	protein-coding
chr14	41502839	41503532	Intergenic	L1Md_A|LINE|L1	-70026	NM_001358037	100041722	Mm.425891	NM_001358037	ENSMUSG00000090440	1700049E17Rik2	-	tandem duplication of RIKEN cDNA 1700049E17 gene, gene 2	protein-coding
chr18	84851048	84851526	promoter-TSS (NM_025797)	promoter-TSS (NM_025797)	-51	NM_001348159	109672	Mm.31018	NM_025797	ENSMUSG00000024646	Cyb5a	0610009N12Rik|Cyb5	cytochrome b5 type A (microsomal)	protein-coding
chr17	28232406	28232810	promoter-TSS (NM_011145)	promoter-TSS (NM_011145)	-146	NM_011145	19015	Mm.328914	NM_011145	ENSMUSG00000002250	Ppard	NUC-1|NUC1|Nr1c2|PPAR-beta|PPAR-delta|PPAR[b]|PPARdelta|Pparb|Pparb/d	peroxisome proliferator activator receptor delta	protein-coding
chr5	16181035	16181500	intron (NM_001110843, intron 4 of 38)	RLTR41|LTR|ERV1	246576	NM_001110846	12293	Mm.159842	NM_009784	ENSMUSG00000040118	Cacna2d1	Ca(v)alpha2delta1|Cacna2|Cchl2a	calcium channel, voltage-dependent, alpha2/delta subunit 1	protein-coding
chr9	62122478	62123118	promoter-TSS (NR_039595)	promoter-TSS (NR_039595)	-189	NM_001368304	93683	Mm.24411	NM_033320	ENSMUSG00000032252	Glce	1110017N23Rik|AI747411|C130034A12Rik|Hsepi	glucuronyl C5-epimerase	protein-coding
chr14	100266176	100266420	Intergenic	GA-rich|Low_complexity|Low_complexity	-116502	NM_010636	16597	Mm.396499	NM_010636	ENSMUSG00000072294	Klf12	2700063E05Rik|AI225908|AI315654|AP-2rep|B130052C06Rik|D530033K05Rik	Kruppel-like factor 12	protein-coding
chr19	61313340	61313906	Intergenic	Intergenic	-85205	NM_009970	12982	Mm.287228	NM_009970	ENSMUSG00000059326	Csf2ra	CD116|Csfgmra|GM-CSF-Ra|GM-CSFR	colony stimulating factor 2 receptor, alpha, low-affinity (granulocyte-macrophage)	protein-coding
chr12	78350887	78351108	intron (NM_145965, intron 2 of 22)	LSU-rRNA_Hsa|rRNA|rRNA	124342	NM_172952	268566	Mm.341742	NM_145965	ENSMUSG00000047454	Gphn	5730552E08Rik|AI662856|BC027112|C230040D23|GPH|GPHRYN|geph	gephyrin	protein-coding
chr16	90985524	90985775	intron (NM_001164483, intron 6 of 31)	intron (NM_001164483, intron 6 of 31)	25446	NM_001045515	104015	Mm.187079	NM_001045515	ENSMUSG00000022973	Synj1	A930006D20Rik|AA675315|mKIAA0910	synaptojanin 1	protein-coding
chr14	90911100	90911361	Intergenic	(CCCTAA)n|Simple_repeat|Simple_repeat	784339	NR_045712	74967	Mm.390704	NR_045712	ENSMUSG00000115001	4930474H20Rik	-	RIKEN cDNA 4930474H20 gene	ncRNA
chr10	72417534	72417819	Intergenic	RLTR44E|LTR|ERVK	-237170	NM_001293683	52696	Mm.62876	NM_025635	ENSMUSG00000019923	Zwint	2010007E07Rik|2600001N01Rik|D10Ertd749e|Zwint-1	ZW10 interactor	protein-coding
chr16	50270715	50271040	intron (NM_027444, intron 5 of 16)	intron (NM_027444, intron 5 of 16)	161512	NM_027444	70508	Mm.28940	NM_027444	ENSMUSG00000022641	Bbx	5530401J07Rik|5730403O13Rik	bobby sox HMG box containing	protein-coding
chr1	111864445	111865257	promoter-TSS (NM_001081316)	promoter-TSS (NM_001081316)	67	NM_001081316	319901	Mm.103468	NM_001081316	ENSMUSG00000038702	Dsel	9330132E09Rik|DS-epi2	dermatan sulfate epimerase-like	protein-coding
chr7	82771086	82771785	intron (NM_175317, intron 18 of 19)	C-rich|Low_complexity|Low_complexity	-15791	NR_046004	77800	Mm.444811	NR_046004	ENSMUSG00000086690	4933406J10Rik	A930009F24Rik	RIKEN cDNA 4933406J10 gene	ncRNA
chr13	39385551	39385907	Intergenic	Intergenic	-424850	NM_001170431	108652	Mm.255506	NM_134060	ENSMUSG00000021432	Slc35b3	4921526O06Rik|AI428480|CGI-19|PABST2|PAPST2	solute carrier family 35, member B3	protein-coding
chr18	57769005	57769358	Intergenic	Lx8|LINE|L1	10814	NR_152224	100503033	Mm.381112	NR_152224	ENSMUSG00000118391	Gm19519	-	predicted gene, 19519	ncRNA
chr14	5710877	5711242	Intergenic	Lx8|LINE|L1	30543	NM_001256886	100041678	Mm.443041	NM_001256886	ENSMUSG00000096003	Gm3500	100041758|Gm3401	predicted gene 3500	protein-coding
chr10	35037552	35037835	Intergenic	RLTR27|LTR|ERVK	554293	NM_001159544	14302	Mm.332432	NM_010237	ENSMUSG00000019779	Frk	BSK|BSK/IYK|C85044|GTK|RAK	fyn-related kinase	protein-coding
chr19	6979786	6980233	promoter-TSS (NM_001360288)	promoter-TSS (NM_001360288)	77	NM_001360286	14227	Mm.4234	NM_008020	ENSMUSG00000056629	Fkbp2	mFKBP13|mFKBP2	FK506 binding protein 2	protein-coding
chr6	146019790	146019992	Intergenic	IMPB_01|Satellite|Satellite	85769	NM_010656	16651	Mm.49689	NM_010656	ENSMUSG00000030255	Sspn	Krag	sarcospan	protein-coding
chr17	67847780	67848285	intron (NM_001347410, intron 17 of 17)	intron (NM_001347410, intron 17 of 17)	102908	NM_001347410	268970	Mm.9935	NM_172964	ENSMUSG00000024043	Arhgap28	AU044757|AW550892|E130310N06	Rho GTPase activating protein 28	protein-coding
chr8	11825406	11826079	3' UTR (NM_001113517, exon 19 of 19)	3' UTR (NM_001113517, exon 19 of 19)	-14779	NM_029326	75528	Mm.440342	NM_029326	ENSMUSG00000031512	Tex29	1700018L24Rik	testis expressed 29	protein-coding
chr2	104122505	104122878	promoter-TSS (NM_026634)	promoter-TSS (NM_026634)	-78	NM_026634	68243	Mm.158191	NM_026634	ENSMUSG00000032671	A930018P22Rik	-	RIKEN cDNA A930018P22 gene	protein-coding
chr1	71812246	71812942	Intergenic	RLTR17|LTR|ERVK	-75518	NR_027659	667931	Mm.214128	NR_027658	ENSMUSG00000099707	Gm8883	EG667931|Gm554	predicted gene 8883	ncRNA
chr14	60086777	60087222	promoter-TSS (NM_015803)	promoter-TSS (NM_015803)	-85	NM_015803	50769	Mm.319599	NM_015803	ENSMUSG00000021983	Atp8a2	AI415030|Atpc1b|agil|wl	ATPase, aminophospholipid transporter-like, class I, type 8A, member 2	protein-coding
chr17	28224130	28224438	intron (NM_027185, intron 7 of 10)	intron (NM_027185, intron 7 of 10)	-8470	NM_011145	19015	Mm.328914	NM_011145	ENSMUSG00000002250	Ppard	NUC-1|NUC1|Nr1c2|PPAR-beta|PPAR-delta|PPAR[b]|PPARdelta|Pparb|Pparb/d	peroxisome proliferator activator receptor delta	protein-coding
chr18	80151336	80152214	promoter-TSS (NM_175028)	promoter-TSS (NM_175028)	-293	NM_175028	240442	Mm.26594	NM_175028	ENSMUSG00000053950	Adnp2	8430420L05Rik|BC024969|Kiaa0863|Zfp508|mKIAA0863	ADNP homeobox 2	protein-coding
chr16	13130485	13130789	exon (NM_015769, exon 8 of 11)	exon (NM_015769, exon 8 of 11)	20901	NM_015769	50505	Mm.287837	NM_015769	ENSMUSG00000022545	Ercc4	AI606920|Xpf	excision repair cross-complementing rodent repair deficiency, complementation group 4	protein-coding
chr15	77842044	77842560	promoter-TSS (NM_022410)	promoter-TSS (NM_022410)	-127	NM_022410	17886	Mm.29677	NM_022410	ENSMUSG00000022443	Myh9	Fltn|Myhn-1|Myhn1|NMHCIIA|NMMHC-A|NMMHC-IIA|TU72.6	myosin, heavy polypeptide 9, non-muscle	protein-coding
chr10	80329332	80330155	promoter-TSS (NM_008793)	promoter-TSS (NM_008793)	-270	NM_008793	18551	Mm.299916	NM_008793	ENSMUSG00000020131	Pcsk4	AI647044|L21221|NEC 3|NEC3|PC4|SPC5	proprotein convertase subtilisin/kexin type 4	protein-coding
chr11	55097663	55098285	promoter-TSS (NM_010299)	promoter-TSS (NM_010299)	-11	NM_010299	14667	Mm.287807	NM_010299	ENSMUSG00000000594	Gm2a	AA408702|AW215435|GM2-AP|SAP-3	GM2 ganglioside activator protein	protein-coding
chr1	89069984	89070565	promoter-TSS (NM_133816)	promoter-TSS (NM_133816)	-141	NM_133816	98402	Mm.170983	NM_133816	ENSMUSG00000036206	Sh3bp4	AI594717|AW227605|BOG25	SH3-domain binding protein 4	protein-coding
chr5	109844686	109845289	Intergenic	Intergenic	-10845	NR_027964	667213	Mm.454429	NR_027964	ENSMUSG00000105044	Gm10416	EG667213	zinc finger protein pseudogene	pseudo
chr13	117958542	117959416	intron (NM_010408, intron 6 of 7)	RMER17B|LTR|ERVK	-238968	NR_045508	71100	Mm.414841	NR_045508	ENSMUSG00000079048	4933413L06Rik	-	RIKEN cDNA 4933413L06 gene	ncRNA
chr4	146263436	146264181	Intergenic	Intergenic	-6577	NM_001083918	666532	Mm.392861	NM_001083918	ENSMUSG00000067916	Zfp991	Gm13139	zinc finger protein 991	protein-coding
chr7	16285958	16286487	intron (NM_001136471, intron 1 of 13)	intron (NM_001136471, intron 1 of 13)	573	NM_001136471	243846	Mm.482401	NM_172297	ENSMUSG00000041375	Ccdc9	2600011L02Rik	coiled-coil domain containing 9	protein-coding
chr14	78241967	78242537	Intergenic	Intergenic	-50774	NR_035499	100316715		NR_035499	ENSMUSG00000087932	Mir1971	mmu-mir-1971	microRNA 1971	ncRNA
chr17	35617127	35617408	TTS (NM_001244654)	TTS (NM_001244654)	9370	NM_001244654	672682	Mm.454025	NM_001244654	ENSMUSG00000090588	Gm9573	Muc21	predicted gene 9573	protein-coding
chr13	58732735	58733185	Intergenic	Intergenic	29351	NR_045469	67585	Mm.84751	NR_045469	ENSMUSG00000114384	4930455J16Rik	-	RIKEN cDNA 4930455J16 gene	ncRNA
chr14	64255490	64255894	intron (NM_001253715, intron 2 of 4)	MLTR14|LTR|ERV1	151369	NM_028525	73382	Mm.481055	NM_028525	ENSMUSG00000021966	Prss52	1700049K14Rik|Tesp3	protease, serine 52	protein-coding
chr12	112713274	112713536	Intergenic	(TGAG)n|Simple_repeat|Simple_repeat	-8769	NM_001024602	217882	Mm.23689	NM_001024602	ENSMUSG00000072825	Cep170b	AI466840|AW555464|Kiaa0284|mKIAA0284	centrosomal protein 170B	protein-coding
chr2	170349774	170350018	intron (NM_001164369, intron 10 of 11)	intron (NM_001164369, intron 10 of 11)	-6465	NR_040610	73303	Mm.443297	NR_040610	ENSMUSG00000086999	Bcas1os2	1700040N02Rik	breast carcinoma amplified sequence 1, opposite strand 2	ncRNA
chr8	113126034	113126456	Intergenic	Intergenic	58983	NR_033584	791378	Mm.350576	NR_033584	ENSMUSG00000110541	Gm10280	-	predicted gene 10280	ncRNA
chr3	129934871	129935076	intron (NM_001293644, intron 1 of 6)	intron (NM_001293644, intron 1 of 6)	33558	NM_009811	12368	Mm.281379	NM_009811	ENSMUSG00000027997	Casp6	CASP-6|Mch2	caspase 6	protein-coding
chr9	36767406	36767999	promoter-TSS (NM_008408)	promoter-TSS (NM_008408)	-80	NM_008408	16430	Mm.2863	NM_008408	ENSMUSG00000032116	Stt3a	AA408947|B5|BB081708|Itm1	STT3, subunit of the oligosaccharyltransferase complex, homolog A (S. cerevisiae)	protein-coding
chr11	86453886	86454527	Intergenic	Intergenic	-30451	NM_029788	76892	Mm.262707	NM_029788	ENSMUSG00000020521	Rnft1	0610013E23Rik|AV007605	ring finger protein, transmembrane 1	protein-coding
chr7	102686925	102687461	5' UTR (NM_198012, exon 1 of 7)	5' UTR (NM_198012, exon 1 of 7)	134	NM_001307998	101700	Mm.39043	NM_198012	ENSMUSG00000073968	Trim68	AI894158|F730114J12Rik|Rnf137|SS-56	tripartite motif-containing 68	protein-coding
chr5	135359229	135360032	intron (NM_001346745, intron 2 of 5)	ZP3AR|Satellite|Satellite	6335	NM_178240	215061	Mm.261834	NM_178240	ENSMUSG00000053388	Trim50	-	tripartite motif-containing 50	protein-coding
chr2	150608488	150608782	promoter-TSS (NM_001356491)	promoter-TSS (NM_001356491)	-68	NM_001356491	71881	Mm.26599	NM_027977	ENSMUSG00000033096	Apmap	2310001A20Rik|AI314817	adipocyte plasma membrane associated protein	protein-coding
chr3	40949354	40949872	Intergenic	CpG	-1037	NM_001368221	214048	Mm.46782	NM_027663	ENSMUSG00000025762	Larp1b	1700108L22Rik|4933421B21Rik|AA690246|Larp2	La ribonucleoprotein domain family, member 1B	protein-coding
chr10	119852359	119852716	promoter-TSS (NR_131760)	promoter-TSS (NR_131760)	-147	NR_131760	78105	Mm.399086	NR_131760	ENSMUSG00000085418	Grip1os1	4930404E01Rik|4930483C13Rik	glutamate receptor interacting protein 1, opposite strand 1	ncRNA
chr9	121188371	121188942	intron (NM_177589, intron 20 of 36)	intron (NM_177589, intron 20 of 36)	88516	NM_177589	209012	Mm.371804	NM_177589	ENSMUSG00000040936	Ulk4	4932415A06Rik|A730098P15	unc-51-like kinase 4	protein-coding
chr5	15039443	15040317	Intergenic	Lx2A1|LINE|L1	-6873	NM_182957	66773	Mm.368256	NM_182957	ENSMUSG00000091897	Gm17019	-	predicted gene 17019	protein-coding
chr16	18036319	18037294	Intergenic	MIRb|SINE|MIR	-16054	NM_010047	13353	Mm.27155	NM_010047	ENSMUSG00000003531	Dgcr6	-	DiGeorge syndrome critical region gene 6	protein-coding
chr6	47672124	47672345	TTS (NR_002841).6	TTS (NR_002841).6	165	NR_002841	19799		NR_002841		Rn4.5s	-	4.5S RNA	rRNA
chr2	6602219	6602586	intron (NM_001160293, intron 7 of 13)	Lx9|LINE|L1	119260	NM_001310447	14007	Mm.398543	NM_010160	ENSMUSG00000002107	Celf2	B230218O03|B230345P09Rik|C88023|CELF-2|CUG-BP2|Cugbp2|D230046B21Rik|Etr-3|Napor|Napor-2|mETR-3	CUGBP, Elav-like family member 2	protein-coding
chr1	42850790	42851692	promoter-TSS (NM_023514)	promoter-TSS (NM_023514)	8	NM_023514	69527	Mm.252982	NM_023514	ENSMUSG00000060679	Mrps9	2310002A08Rik|AW322516|Mrp-S9|S9mt|mg637	mitochondrial ribosomal protein S9	protein-coding
chr10	5316648	5316936	intron (NM_001347711, intron 43 of 145)	B3|SINE|B2	-122085	NM_001079686	64009	Mm.331626	NM_022027	ENSMUSG00000096054	Syne1	8B|A330049M09Rik|BE692247|C130039F11Rik|CPG2|KASH1|Myne1|mKIAA1756|myne-1	spectrin repeat containing, nuclear envelope 1	protein-coding
chr5	136678553	136679114	Intergenic	ZP3AR|Satellite|Satellite	-14313	NM_021611	59310	Mm.5178	NM_021611	ENSMUSG00000005474	Myl10	1700027I08Rik|Mylc2pl|PLRLC	myosin, light chain 10, regulatory	protein-coding
chr7	4119322	4119974	5' UTR (NM_001305822, exon 1 of 14)	5' UTR (NM_001305822, exon 1 of 14)	118	NM_001109765	57776	Mm.29729	NM_021324	ENSMUSG00000030428	Ttyh1	4930459B04Rik|6330408P11Rik|TTY1|mTTY1|tty	tweety family member 1	protein-coding
chr8	71950806	71951321	promoter-TSS (NM_001164581)	promoter-TSS (NM_001164581)	-3	NM_001164581	234413	Mm.334607	NM_001164581	ENSMUSG00000052446	Zfp961	A230105L22Rik|BC065788|mszf37|mszf55-2	zinc finger protein 961	protein-coding
chr5	111644039	111644847	Intergenic	(GGATG)n|Simple_repeat|Simple_repeat	62882	NR_015546	330164	Mm.193276	NM_177875	ENSMUSG00000052848	C130026L21Rik	-	RIKEN cDNA C130026L21 gene	ncRNA
chr15	72034079	72034424	promoter-TSS (NM_027174)	promoter-TSS (NM_027174)	-24	NM_027174	69700	Mm.322500	NM_027174	ENSMUSG00000079022	Col22a1	2310067L16Rik|C80743	collagen, type XXII, alpha 1	protein-coding
chr6	50596127	50597159	promoter-TSS (NM_027564)	promoter-TSS (NM_027564)	-53	NM_027564	70821	Mm.157323	NM_027564	ENSMUSG00000029828	4921507P07Rik	TISP74	RIKEN cDNA 4921507P07 gene	protein-coding
chr12	70877721	70877937	intron (NM_028127, intron 4 of 13)	intron (NM_028127, intron 4 of 13)	52315	NM_028127	319710	Mm.2962	NM_028127	ENSMUSG00000048285	Frmd6	2610019M19Rik|4930488L10Rik|AW212977|Willin	FERM domain containing 6	protein-coding
chr4	147176305	147176746	Intergenic	RLTR44E|LTR|ERVK	-108089	NR_045446	71270	Mm.460830	NR_045446	ENSMUSG00000093617	4933438K21Rik	-	RIKEN cDNA 4933438K21 gene	ncRNA
chr11	86516666	86517084	exon (NM_028259, exon 9 of 10)	exon (NM_028259, exon 9 of 10)	27932	NM_001363162	72508	Mm.394280	NM_028259	ENSMUSG00000020516	Rps6kb1	2610318I15Rik|AA959758|AI256796|AI314060|P70S6K1|S6K|S6K-beta-1|S6K1|p70 S6K-alpha|p70 S6KA|p70-S6K 1|p70/85s6k|p70s6k	ribosomal protein S6 kinase, polypeptide 1	protein-coding
chrX	73458860	73459300	promoter-TSS (NM_207104)	promoter-TSS (NM_207104)	-51	NM_028633	73738	Mm.264899	NM_028633	ENSMUSG00000031371	Haus7	1110020L19Rik|Uchl5ip|Uip1	HAUS augmin-like complex, subunit 7	protein-coding
chr8	88696540	88697160	promoter-TSS (NM_001128170)	promoter-TSS (NM_001128170)	-178	NM_001276279	74256	Mm.490395	NM_173369	ENSMUSG00000036712	Cyld	2010013M14Rik|2900009M21Rik|C130039D01Rik|CDMT|CYLD1|EAC|mKIAA0849	CYLD lysine 63 deubiquitinase	protein-coding
chr16	74127990	74128262	intron (NM_175549, intron 2 of 27)	intron (NM_175549, intron 2 of 27)	213941	NR_030464	751561		NR_030464	ENSMUSG00000104758	Mir691	Mirn691|mir-691|mmu-mir-691	microRNA 691	ncRNA
chr15	37960550	37961616	promoter-TSS (NM_199476)	promoter-TSS (NM_199476)	-28	NM_199476	382985	Mm.24738	NM_199476	ENSMUSG00000022292	Rrm2b	p53R2	ribonucleotide reductase M2 B (TP53 inducible)	protein-coding
chr19	53058009	53058476	Intergenic	Intergenic	-18010	NR_045320	78457	Mm.76932	NR_045320	ENSMUSG00000099988	1700054A03Rik	-	RIKEN cDNA 1700054A03 gene	ncRNA
chr7	42738736	42739203	Intergenic	Intergenic	-46251	NM_001008427	434179	Mm.284947	NM_001008427	ENSMUSG00000069727	Zfp975	EG434179|Gm5595|mszf88	zinc finger protein 975	protein-coding
chr12	105655516	105655785	intron (NM_029654, intron 14 of 41)	intron (NM_029654, intron 14 of 41)	29591	NM_029654	76559	Mm.114362	NM_029654	ENSMUSG00000041341	Atg2b	2410024A21Rik|AI047755|AI503411|AW558123|C030004M05Rik|C630028L02Rik|mKIAA4067	autophagy related 2B	protein-coding
chr6	42644869	42645563	promoter-TSS (NM_146174)	promoter-TSS (NM_146174)	-175	NM_146174	232748	Mm.279659	NM_146174	ENSMUSG00000029851	Tcaf2	Fam115c	TRPM8 channel-associated factor 2	protein-coding
chr4	134396090	134396477	promoter-TSS (NM_001285875)	promoter-TSS (NM_001285875)	-37	NM_133880	100163	Mm.22116	NM_133880	ENSMUSG00000037366	Pafah2	2310074E22Rik|AI507170	platelet-activating factor acetylhydrolase 2	protein-coding
chr9	108832181	108832791	intron (NM_080437, intron 2 of 34)	CpG	6441	NM_080437	107934	Mm.39945	NM_080437	ENSMUSG00000023473	Celsr3	Adgrc3|Fmi1|flamingo|mKIAA0812	cadherin, EGF LAG seven-pass G-type receptor 3	protein-coding
chr8	70212285	70212945	promoter-TSS (NM_001007570)	promoter-TSS (NM_001007570)	-334	NM_001007570	73095	Mm.185413	NM_001007570	ENSMUSG00000002346	Slc25a42	2900084M01Rik	solute carrier family 25, member 42	protein-coding
chr6	94094262	94094564	intron (NM_001029850, intron 1 of 23)	intron (NM_001029850, intron 1 of 23)	143029	NR_130996	78178	Mm.452749	NR_130996	ENSMUSG00000045095	4930511A08Rik	-	RIKEN cDNA 4930511A08 gene	ncRNA
chr1	34510941	34511372	Intergenic	Intergenic	12744	NM_001360855	21755	Mm.10725	NM_009355	ENSMUSG00000026125	Prss39	Tesp1	protease, serine 39	protein-coding
chr11	98116217	98116523	intron (NM_028149, intron 2 of 14)	intron (NM_028149, intron 2 of 14)	33246	NM_028149	72194	Mm.218350	NM_028149	ENSMUSG00000020883	Fbxl20	2610511F20Rik|4632423N09Rik|AI849362|AL117906|C86145|Fbl2|Scr|mKIAA4147	F-box and leucine-rich repeat protein 20	protein-coding
chr5	88764668	88765413	promoter-TSS (NM_007832)	promoter-TSS (NM_007832)	27	NM_007832	13178	Mm.298892	NM_007832	ENSMUSG00000029366	Dck	-	deoxycytidine kinase	protein-coding
chr4	97629936	97630343	intron (NM_001122952, intron 1 of 10)	intron (NM_001122952, intron 1 of 10)	-45548	NR_015513	319865	Mm.373807	NM_177023		E130114P18Rik	-	RIKEN cDNA E130114P18 gene	ncRNA
chr11	36547996	36548454	intron (NM_011856, intron 2 of 28)	intron (NM_011856, intron 2 of 28)	396016	NM_011856	23964	Mm.439889	NM_011856	ENSMUSG00000049336	Tenm2	Odz2|Odz3|Ten-2|Ten-m2	teneurin transmembrane protein 2	protein-coding
chr5	136650004	136650216	Intergenic	ZP3AR|Satellite|Satellite	-43036	NM_021611	59310	Mm.5178	NM_021611	ENSMUSG00000005474	Myl10	1700027I08Rik|Mylc2pl|PLRLC	myosin, light chain 10, regulatory	protein-coding
chr7	35381699	35382180	intron (NM_027897, intron 11 of 14)	C-rich|Low_complexity|Low_complexity	14828	NM_178643	101831	Mm.389855	NM_178643	ENSMUSG00000030493	Faap24	AW124591|AW538696|C230052I12Rik	Fanconi anemia core complex associated protein 24	protein-coding
chr8	109074996	109075447	promoter-TSS (NR_126329)	promoter-TSS (NR_126329)	-1	NR_126329	628686	Mm.203332	NR_126329	ENSMUSG00000097393	D030068K23Rik	-	RIKEN cDNA D030068K23 gene	ncRNA
chr17	17120999	17121858	promoter-TSS (NM_011765)	promoter-TSS (NM_011765)	45	NM_011765	22759	Mm.436633	NM_011765	ENSMUSG00000095990	Zfp97	NGD16-4	zinc finger protein 97	protein-coding
chr4	111686866	111687350	Intergenic	Intergenic	-32902	NM_026470	67946	Mm.275526	NM_026470	ENSMUSG00000034401	Spata6	1700062C23Rik|AI790763|Hash|KRP|Mash	spermatogenesis associated 6	protein-coding
chr16	22439481	22439973	promoter-TSS (NM_023794)	promoter-TSS (NM_023794)	-157	NM_023794	104156	Mm.155708	NM_023794	ENSMUSG00000013089	Etv5	1110005E01Rik|8430401F14Rik|ERM	ets variant 5	protein-coding
chr2	121806727	121807431	promoter-TSS (NM_172673)	promoter-TSS (NM_172673)	-22	NM_001360084	228564	Mm.121514	NM_172673	ENSMUSG00000027238	Frmd5	1500032A09Rik|A930004K21Rik|R75430	FERM domain containing 5	protein-coding
chr1	151210739	151211076	Intergenic	Intergenic	72873	NR_038011	402734	Mm.337666	NR_038011		C730036E19Rik	lncLSTR	RIKEN cDNA C730036E19 gene	ncRNA
chr16	14159302	14159650	promoter-TSS (NM_001081154)	promoter-TSS (NM_001081154)	-150	NR_030252	723916		NR_030252	ENSMUSG00000070074	Mir484	Mirn484|mir-484|mmu-mir-484	microRNA 484	ncRNA
chr13	66715442	66716345	Intergenic	Intergenic	189457	NM_026219	67530	Mm.379136	NM_026219	ENSMUSG00000021520	Uqcrb	2210415M14Rik|QP-C|QPC|UQBC|UQBP|UQPC	ubiquinol-cytochrome c reductase binding protein	protein-coding
chr1	77514923	77515494	promoter-TSS (NM_007936)	promoter-TSS (NM_007936)	-120	NM_007936	13838	Mm.400747	NM_007936	ENSMUSG00000026235	Epha4	2900005C20Rik|AI385584|Cek8|Hek8|Sek|Sek1|Tyro1|rb	Eph receptor A4	protein-coding
chr5	142296419	142296927	Intergenic	ORR1B2|LTR|ERVL-MaLR	-104824	NM_199068	17425	Mm.24214	NM_010812	ENSMUSG00000056493	Foxk1	A630048H08Rik|AI463295|Gm10868|Mnf	forkhead box K1	protein-coding
chr13	100945355	100945755	Intergenic	Intergenic	-112128	NM_022885	69048	Mm.402215	NM_022885	ENSMUSG00000021629	Slc30a5	1810010K08Rik|AF233321|ZNT5|ZTL1|ZnT-5|Zntl1	solute carrier family 30 (zinc transporter), member 5	protein-coding
chr6	47752593	47753233	promoter-TSS (NR_002841).3	promoter-TSS (NR_002841).3	12	NR_002841	19799		NR_002841		Rn4.5s	-	4.5S RNA	rRNA
chr11	113903007	113903608	intron (NM_172800, intron 2 of 44)	intron (NM_172800, intron 2 of 44)	-151492	NM_001163346	56699	Mm.293378	NM_020006	ENSMUSG00000041598	Cdc42ep4	1500041M20Rik|Borg4|CEP4	CDC42 effector protein (Rho GTPase binding) 4	protein-coding
chr14	67715643	67716218	promoter-TSS (NM_175384)	promoter-TSS (NM_175384)	-89	NM_175384	108912	Mm.33831	NM_175384	ENSMUSG00000048922	Cdca2	2610311M19Rik|AI586158	cell division cycle associated 2	protein-coding
chr10	93246861	93247220	TTS (NM_001282967)	TTS (NM_001282967)	64119	NM_001282967	13713	Mm.4454	NM_013508	ENSMUSG00000008398	Elk3	D430049E23Rik|Erp|Etrp|Net|Sap-2	ELK3, member of ETS oncogene family	protein-coding
chr6	47813341	47813827	promoter-TSS (NM_009787)	promoter-TSS (NM_009787)	-72	NM_009787	12304	Mm.2442	NM_009787	ENSMUSG00000025823	Pdia4	AI987846|Cai|ERp-72|Erp72	protein disulfide isomerase associated 4	protein-coding
chr2	120153990	120154886	exon (NM_133838, exon 1 of 6)	exon (NM_133838, exon 1 of 6)	137	NM_133838	98878	Mm.132226	NM_133838	ENSMUSG00000027293	Ehd4	2210022F10Rik|AI197390|AI846352|AV006278|Past2	EH-domain containing 4	protein-coding
chr14	4111358	4111695	Intergenic	Intergenic	87585	NM_001029930	545007	Mm.449725	NM_001029930	ENSMUSG00000096775	Gm5796	-	predicted gene 5796	protein-coding
chr2	5895119	5895710	promoter-TSS (NM_021305)	promoter-TSS (NM_021305)	18	NM_001356411	57743	Mm.21435	NM_021305	ENSMUSG00000025816	Sec61a2	-	Sec61, alpha subunit 2 (S. cerevisiae)	protein-coding
chr8	20331086	20331419	Intergenic	Intergenic	31950	NM_001177408	100040599	Mm.491087	NM_001177408	ENSMUSG00000074449	Gm15319	-	predicted gene 15319	protein-coding
chr17	4964448	4964863	Intergenic	ORR1B1|LTR|ERVL-MaLR	-30419	NM_001085355	239985	Mm.133401	NM_001085355	ENSMUSG00000069729	Arid1b	8030481M12|9330189K18Rik|AI836955|Ardi1b|B230217J03Rik|BAF250B|mKIAA1235	AT rich interactive domain 1B (SWI-like)	protein-coding
chr15	44618870	44619384	promoter-TSS (NM_019480)	promoter-TSS (NM_019480)	-100	NM_001357690	55960	Mm.287896	NM_019480	ENSMUSG00000022339	Ebag9	AI835379|Rcas1	estrogen receptor-binding fragment-associated gene 9	protein-coding
chr7	4876691	4877146	promoter-TSS (NM_001101598)	promoter-TSS (NM_001101598)	-135	NM_001101598	664994	Mm.302624	NM_001101598	ENSMUSG00000086784	Isoc2a	Isoc2	isochorismatase domain containing 2a	protein-coding
chr17	33493135	33493530	Intergenic	Intergenic	-30753	NR_137627	224697	Mm.29304	NM_172619	ENSMUSG00000024299	Adamts10	9430006O18|AW045948|Adam-ts10|Adamts-10|Znmp	a disintegrin-like and metallopeptidase (reprolysin type) with thrombospondin type 1 motif, 10	protein-coding
chr13	63430858	63431468	intron (NM_001347515, intron 1 of 15)	intron (NM_001347515, intron 1 of 15)	582	NM_007985	14088	Mm.126106	NM_007985	ENSMUSG00000021461	Fancc	Facc	Fanconi anemia, complementation group C	protein-coding
chr8	120588887	120589591	promoter-TSS (NM_178856)	promoter-TSS (NM_178856)	-164	NM_178856	272551	Mm.275910	NM_178856	ENSMUSG00000031821	Gins2	2210013I18Rik|4833427B12Rik|AI323585|Pfs2	GINS complex subunit 2 (Psf2 homolog)	protein-coding
chr6	50621145	50621402	Intergenic	Intergenic	-24683	NM_027564	70821	Mm.157323	NM_027564	ENSMUSG00000029828	4921507P07Rik	TISP74	RIKEN cDNA 4921507P07 gene	protein-coding
chr11	56040659	56041306	promoter-TSS (NM_153079)	promoter-TSS (NM_153079)	5	NM_153079	216749	Mm.213205	NM_153079	ENSMUSG00000037393	Nmur2	Nmu2r	neuromedin U receptor 2	protein-coding
chr5	81142134	81142391	intron (NM_001359828, intron 2 of 26)	intron (NM_001359828, intron 2 of 26)	120669	NM_198702	319387	Mm.273631	NM_198702	ENSMUSG00000037605	Adgrl3	5430402I23Rik|CIRL-3|D130075K09Rik|Gm1379|LEC3|Lphn3|mKIAA0768	adhesion G protein-coupled receptor L3	protein-coding
chr3	10342475	10342927	intron (NM_001331015, intron 6 of 7)	RLTR20D|LTR|ERVK	-7045	NM_001010834	241877	Mm.442146	NM_001010834	ENSMUSG00000058921	Slc10a5	Gm405|mP5	solute carrier family 10 (sodium/bile acid cotransporter family), member 5	protein-coding
chr6	82939192	82939924	exon (NM_011350, exon 1 of 14)	exon (NM_011350, exon 1 of 14)	211	NM_011350	20355	Mm.270543	NM_011350	ENSMUSG00000000627	Sema4f	Sema W	sema domain, immunoglobulin domain (Ig), TM domain, and short cytoplasmic domain	protein-coding
chr11	34223135	34223616	Intergenic	(CTCTG)n|Simple_repeat|Simple_repeat	-15286	NM_023907	14233	Mm.32926	NM_023907	ENSMUSG00000047861	Foxi1	5830401E05Rik|FREAC6|Fkh10|HFH-3|Hfh3	forkhead box I1	protein-coding
chr3	115906983	115907517	intron (NM_027193, intron 4 of 7)	intron (NM_027193, intron 4 of 7)	19067	NM_027193	69740	Mm.5915	NM_027193	ENSMUSG00000033554	Dph5	2410012M04Rik|AU045680|C80186	diphthamide biosynthesis 5	protein-coding
chr3	152486052	152486667	intron (NM_001081277, intron 10 of 13)	CpG	89675	NM_001287139	108946	Mm.379292	NM_198416	ENSMUSG00000039068	Zzz3	3110065C23Rik|6430567E01Rik|AA408566|AI481057|AW556059|R75514	zinc finger, ZZ domain containing 3	protein-coding
chr6	118139109	118139584	promoter-TSS (NM_001362149)	promoter-TSS (NM_001362149)	-206	NM_030165	78752	Mm.300317	NM_030165	ENSMUSG00000042042	Csgalnact2	4632415D10Rik|Galnact2	chondroitin sulfate N-acetylgalactosaminyltransferase 2	protein-coding
chr3	153313594	153314021	intron (NM_011372, intron 3 of 4)	intron (NM_011372, intron 3 of 4)	-15158	NR_126464	75489	Mm.443252	NR_126464	ENSMUSG00000105023	1700012D16Rik	-	RIKEN cDNA 1700012D16 gene	ncRNA
chr2	92093610	92093855	Intergenic	(CCCTAA)n|Simple_repeat|Simple_repeat	-69562	NM_011957	26427	Mm.10353	NM_011957	ENSMUSG00000027230	Creb3l1	Oasis	cAMP responsive element binding protein 3-like 1	protein-coding
chr6	128764168	128764512	Intergenic	Intergenic	24301	NM_008527	17059	Mm.480764	NM_008527	ENSMUSG00000030325	Klrb1c	AI462337|CD161|Klrb1b|Ly-59|Ly55c|Ly59|NK-RP1|NK1.1|NKR-P1.9|NKRP1|NKRP140|Nk-1|Nk-1.2|Nk1|Nk1.2|Nkrp1b|Nkrp1c|ly-55c	killer cell lectin-like receptor subfamily B member 1C	protein-coding
chr7	140125410	140125789	promoter-TSS (NM_001346725)	promoter-TSS (NM_001346725)	-58	NM_001346725	212503	Mm.486735	NM_153783	ENSMUSG00000025464	Paox	2410012F02Rik|AI118225|Pao	polyamine oxidase (exo-N4-amino)	protein-coding
chr4	149517758	149518278	promoter-TSS (NM_023465)	promoter-TSS (NM_023465)	-223	NM_023465	67087	Mm.299735	NM_023465	ENSMUSG00000028988	Ctnnbip1	1110008O09Rik|2310001I19Rik|AW457332|Catnbip1|Icat	catenin beta interacting protein 1	protein-coding
chr4	142641103	142641620	Intergenic	Intergenic	-401960	NM_001109685	71529	Mm.255986	NM_144531	ENSMUSG00000040606	Kazn	2310007B04Rik|9030409G11Rik|AI256607|AI666764|AW061099|Kaz|Kazrin	kazrin, periplakin interacting protein	protein-coding
chr15	100747064	100747442	Intergenic	C-rich|Low_complexity|Low_complexity	-14494	NM_021530	59033	Mm.209856	NM_021530	ENSMUSG00000023032	Slc4a8	AW493845|C230026C11|NDCBE|kNBC-3	solute carrier family 4 (anion exchanger), member 8	protein-coding
chr13	5861175	5861482	promoter-TSS (NM_011803)	promoter-TSS (NM_011803)	-161	NM_011803	23849	Mm.275036	NM_011803	ENSMUSG00000000078	Klf6	AI448727|BCD1|C86813|CPBP|Copeb|FM2|FM6|Ierepo1|Ierepo3|R75280|Zf9	Kruppel-like factor 6	protein-coding
chr10	76691462	76691744	Intergenic	Intergenic	34441	NM_009933	12833	Mm.2509	NM_009933	ENSMUSG00000001119	Col6a1	AI747156|Col6a-1	collagen, type VI, alpha 1	protein-coding
chr1	93115016	93115437	Intergenic	Intergenic	-13352	NM_001294149	16560	Mm.276408	NM_008440	ENSMUSG00000014602	Kif1a	ATSV|C630002N23Rik|Gm1626|Kns1	kinesin family member 1A	protein-coding
chr4	108300757	108301350	promoter-TSS (NM_001033634)	promoter-TSS (NM_001033634)	37	NM_001033634	414872	Mm.426241	NM_001033634	ENSMUSG00000034636	Zyg11b	1110046I03Rik|2810482G21Rik|D4Mgi23|Gm431|mKIAA1730	zyg-ll family member B, cell cycle regulator	protein-coding
chr14	60634052	60634785	promoter-TSS (NM_001033272)	promoter-TSS (NM_001033272)	-287	NM_001033272	219140	Mm.149776	NM_001033272	ENSMUSG00000021990	Spata13	C79050|ESTM11|X83327|mFLJ00298	spermatogenesis associated 13	protein-coding
chr7	76318314	76318633	intron (NM_001199224, intron 2 of 22)	C-rich|Low_complexity|Low_complexity	88586	NM_001199224	244071	Mm.322829	NM_172902	ENSMUSG00000025754	Agbl1	Ccp4|D430020F16|EG244071|Nna1-l1	ATP/GTP binding protein-like 1	protein-coding
chr9	3031668	3031840	Intergenic	GSAT_MM|Satellite|Satellite	6989	NR_039546	100628572		NR_039546	ENSMUSG00000106183	Mir101c	mir-101c|mmu-mir-101c	microRNA 101c	ncRNA
chr10	33811695	33812204	Intergenic	RMER17A2|LTR|ERVK	-29834	NM_001101452	215895	Mm.473684	NM_001101452	ENSMUSG00000090298	Sult3a2	EG215895|Gm4794	sulfotransferase family 3A, member 2	protein-coding
chr3	131564498	131565220	promoter-TSS (NM_001289479)	promoter-TSS (NM_001289479)	91	NM_001289479	23971	Mm.244912	NM_011863	ENSMUSG00000028032	Papss1	AI325286|Asapk|SK1	3'-phosphoadenosine 5'-phosphosulfate synthase 1	protein-coding
chr17	33358475	33359334	promoter-TSS (NM_207541)	promoter-TSS (NM_207541)	-26	NM_207541	224694	Mm.170029	NM_207541	ENSMUSG00000003929	Zfp81	AA409460|AA409461|C330034P10Rik|D330034E10Rik|Hszfp36|KRAB13|Zfp78	zinc finger protein 81	protein-coding
chr6	147119229	147119571	Intergenic	Intergenic	28325	NM_001081237	232539	Mm.491206	NM_001081237	ENSMUSG00000040102	Klhl42	A330079N23Rik|AI450355|C230080I20Rik|Ctb9|Klhdc5|mKIAA1340	kelch-like 42	protein-coding
chrX	99975219	99975666	promoter-TSS (NM_001177943)	promoter-TSS (NM_001177943)	-164	NM_001177942	13607	Mm.328086	NM_010099	ENSMUSG00000059327	Eda	EDA1|Ed1|Eda-A1|Eda-A2|HED|Ta|Tnlg7c|XLHED|tabby	ectodysplasin-A	protein-coding
chr14	7537674	7538109	Intergenic	Intergenic	30675	NM_001270842	100041874	Mm.350858	NM_001270842	ENSMUSG00000079364	Gm3558	-	predicted gene 3558	protein-coding
chr1	190689370	190689652	Intergenic	Intergenic	222259	NM_178775	320119	Mm.220912	NM_178775	ENSMUSG00000089872	Rps6kc1	AA682037|B130003F20Rik|C80612|Rpk118	ribosomal protein S6 kinase polypeptide 1	protein-coding
chr4	150236914	150237385	promoter-TSS (NM_023119)	promoter-TSS (NM_023119)	-48	NM_023119	13806	Mm.70666	NM_023119	ENSMUSG00000063524	Eno1	0610008I15|AL022784|Eno-1|MBP-1	enolase 1, alpha non-neuron	protein-coding
chr10	95404834	95405201	Intergenic	Intergenic	10266	NM_001168657	216233	Mm.474283	NM_007706	ENSMUSG00000020027	Socs2	8030460M17|AI527257|AW108012|CIS2|Cish2|D130043N08Rik|JAB|SOCS-2|SSI-2|hg	suppressor of cytokine signaling 2	protein-coding
chr17	22497207	22497646	Intergenic	Intergenic	73224	NM_001331196	74149	Mm.30767	NM_198003	ENSMUSG00000071266	Zfp946	1300003B13Rik	zinc finger protein 946	protein-coding
chr7	75880758	75881010	Intergenic	Intergenic	32546	NM_029652	207952	Mm.206223	NM_029652	ENSMUSG00000055652	Klhl25	2810402K13Rik|BC027373|Enc-1	kelch-like 25	protein-coding
chr13	65563202	65563636	Intergenic	Intergenic	-214825	NM_001371118
chr7	41560419	41561140	Intergenic	Intergenic	-60889	NM_001033530	101835	Mm.370336	NM_001033530	ENSMUSG00000074166	AW146154	AI451288	expressed sequence AW146154	protein-coding
chr3	148850477	148850936	intron (NM_001081298, intron 8 of 23)	intron (NM_001081298, intron 8 of 23)	103929	NM_001081298	99633	Mm.9776	NM_001081298	ENSMUSG00000028184	Adgrl2	AI450192|CIRL-2|Gm619|Lec1|Lphh1|Lphn2|mKIAA0786	adhesion G protein-coupled receptor L2	protein-coding
chr4	130520165	130520793	Intergenic	Intergenic	53557	NM_025998	67149	Mm.423029	NM_025998	ENSMUSG00000078532	Nkain1	2610200G18Rik|2810426C15Rik	Na+/K+ transporting ATPase interacting 1	protein-coding
chr2	77411725	77412144	exon (NM_001113399, exon 8 of 8)	exon (NM_001113399, exon 8 of 8)	-50710	NR_040368	100503106	Mm.443215	NR_040368	ENSMUSG00000085845	Gm13944	-	predicted gene 13944	ncRNA
chr15	89915744	89916223	Intergenic	Intergenic	-74123	NM_018803	54526	Mm.261601	NM_018803	ENSMUSG00000063260	Syt10	-	synaptotagmin X	protein-coding
chr3	58721221	58721849	intron (NR_045167, intron 2 of 7)	intron (NR_045167, intron 2 of 7)	28946	NR_045167	71301	Mm.254475	NR_045167	ENSMUSG00000097725	4930593A02Rik	4933440I01Rik	RIKEN cDNA 4930593A02 gene	ncRNA
chr8	22060273	22060829	promoter-TSS (NM_007511)	promoter-TSS (NM_007511)	-170	NM_001243161	207958	Mm.267439	NM_183142	ENSMUSG00000063362	Alg11	AI849156|AW492253|B230397C21|Mmat-4(5)	asparagine-linked glycosylation 11 (alpha-1,2-mannosyltransferase)	protein-coding
chr7	6201766	6202041	intron (NM_178028, intron 1 of 5)	ZP3AR|Satellite|Satellite	4813	NM_178028	232836	Mm.246599	NM_178028	ENSMUSG00000034660	Galp	-	galanin-like peptide	protein-coding
chr2	60382925	60383560	promoter-TSS (NM_013825)	promoter-TSS (NM_013825)	31	NM_013825	17076	Mm.2074	NM_013825	ENSMUSG00000026980	Ly75	CD205|DEC-205|DEC205	lymphocyte antigen 75	protein-coding
chr5	141782745	141783118	intron (NM_177879, intron 4 of 44)	ZP3AR|Satellite|Satellite	541397	NM_177879	330222	Mm.151931	NM_177879	ENSMUSG00000039683	Sdk1	5330440E10|6720466O15Rik	sidekick cell adhesion molecule 1	protein-coding
chr4	136206006	136206590	promoter-TSS (NM_001355698)	promoter-TSS (NM_001355698)	-67	NM_001008232	230837	Mm.77788	NM_001008232	ENSMUSG00000036995	Asap3	9430088F20Rik|Ddefl1|Gm140|UPLC1	ArfGAP with SH3 domain, ankyrin repeat and PH domain 3	protein-coding
chr5	15482900	15483708	Intergenic	Lx2A1|LINE|L1	45918	NM_001310449	100861755	Mm.382859	NM_001310449	ENSMUSG00000106445	Gm21190	-	predicted gene, 21190	protein-coding
chr7	98309352	98309734	promoter-TSS (NR_153759)	promoter-TSS (NR_153759)	-1	NM_001360616	66190	Mm.334041	NM_025408	ENSMUSG00000030760	Acer3	1110057L18Rik|5430429L08Rik|AV015045|Phca|aPHC	alkaline ceramidase 3	protein-coding
chr5	129941332	129941929	promoter-TSS (NM_027121)	promoter-TSS (NM_027121)	-479	NM_001001327	69568	Mm.288718	NM_027121	ENSMUSG00000066735	Vkorc1l1	2310024K08Rik	vitamin K epoxide reductase complex, subunit 1-like 1	protein-coding
chr2	151669943	151671253	Intergenic	Intergenic	-2065	NM_001276400	668929	Mm.473683	NM_001114677	ENSMUSG00000074704	Rad21l	Gm14160|MeiRAD21L|Rad21l1	RAD21-like (S. pombe)	protein-coding
chr7	48788693	48789492	promoter-TSS (NM_028031)	promoter-TSS (NM_028031)	89	NM_028031	243983	Mm.279116	NM_028031	ENSMUSG00000030471	Zdhhc13	2410004E01Rik|C530010M18|HIP3RP|Hip14l|kojak|skc4	zinc finger, DHHC domain containing 13	protein-coding
chr12	113202106	113202329	Intergenic	Intergenic	16314	NM_153776	69195	Mm.313244	NM_153776	ENSMUSG00000049036	Tmem121	2410008J05Rik|Hole	transmembrane protein 121	protein-coding
chr9	121697582	121697950	intron (NM_001164562, intron 1 of 6)	intron (NM_001164562, intron 1 of 6)	7263	NM_178677	215474	Mm.31421	NM_178677	ENSMUSG00000061536	Sec22c	4932412K21|5930407I15Rik|C530046H07|Sec22l3	SEC22 homolog C, vesicle trafficking protein	protein-coding
chr13	58359037	58359579	Intergenic	Intergenic	-4361	NM_175214	75050	Mm.385742	NM_175214	ENSMUSG00000060176	Kif27	4930517I18Rik	kinesin family member 27	protein-coding
chr2	72398352	72398617	intron (NM_023057, intron 11 of 19)	intron (NM_023057, intron 11 of 19)	-77735	NM_025866	66953	Mm.270676	NM_025866	ENSMUSG00000055612	Cdca7	2310021G01Rik|AU044109|JPO1	cell division cycle associated 7	protein-coding
chr5	25759533	25760383	promoter-TSS (NM_001310504)	promoter-TSS (NM_001310504)	-15	NM_001004365	242894	Mm.150319	NM_001004365	ENSMUSG00000056367	Actr3b	9630005C02|ARP11|AW047569|Arp3b|Arp3beta	ARP3 actin-related protein 3B	protein-coding
chr2	134643634	134644268	exon (NM_029148, exon 1 of 8)	exon (NM_029148, exon 1 of 8)	170	NM_029148	52837	Mm.264096	NM_029148	ENSMUSG00000034723	Tmx4	2810417D04Rik|4930500L08Rik|AI843224|AW046784|D2Bwg1356e|Txndc13|mKIAA1162	thioredoxin-related transmembrane protein 4	protein-coding
chr13	92354495	92355439	promoter-TSS (NM_010829)	promoter-TSS (NM_010829)	36	NM_010829	17686	Mm.343101	NM_010829	ENSMUSG00000014850	Msh3	D13Em1|Rep-3|Rep3	mutS homolog 3	protein-coding
chr15	25515765	25516084	Intergenic	ORR1C1-int|LTR|ERVL-MaLR	101732	NR_027376	432939	Mm.146555	NM_001013791		Gm5468	100040583|EG432939	predicted gene 5468	ncRNA
chr17	65961499	65962077	Intergenic	Intergenic	-10601	NM_023053	65960	Mm.10153	NM_023053	ENSMUSG00000024098	Twsg1	1810013J15Rik|9030422N06Rik|AW552143|D17Ertd403e|Tsg|Twg	twisted gastrulation BMP signaling modulator 1	protein-coding
chr1	52233163	52233617	promoter-TSS (NM_001113383)	promoter-TSS (NM_001113383)	-158	NM_001081081	14660	Mm.398608	NM_001081081	ENSMUSG00000026103	Gls	6330442B14|AI314027|B230365M23Rik	glutaminase	protein-coding
chr1	112416509	112417295	promoter-TSS (NR_157044)	promoter-TSS (NR_157044)	16	NR_157044	102635484		NR_157044		Gm32810	Gm18406	predicted gene, 32810	ncRNA
chr8	26382422	26382820	Intergenic	Intergenic	224452	NM_199042	73754	Mm.383241	NM_199042	ENSMUSG00000037214	Thap1	4833431A01Rik|AW490810	THAP domain containing, apoptosis associated protein 1	protein-coding
chr7	27460036	27460597	intron (NM_144923, intron 3 of 4)	ZP3AR|Satellite|Satellite	7898	NM_001290525	233016	Mm.24021	NM_144923	ENSMUSG00000040466	Blvrb	-	biliverdin reductase B (flavin reductase (NADPH))	protein-coding
chr11	71018927	71019818	promoter-TSS (NM_025993)	promoter-TSS (NM_025993)	-69	NM_033562	116891	Mm.28131	NM_033562	ENSMUSG00000018442	Derl2	CGI-101|Derlin-2|F-lana|Flana	Der1-like domain family, member 2	protein-coding
chr11	90249099	90249625	promoter-TSS (NM_026178)	promoter-TSS (NM_026178)	-114	NM_026178	67468	Mm.277518	NM_026178	ENSMUSG00000003948	Mmd	1200017E07Rik|1810073C06Rik|AA690185	monocyte to macrophage differentiation-associated	protein-coding
chr8	27361871	27362555	Intergenic	Intergenic	-6498	NM_173212	108043	Mm.110444	NM_027454	ENSMUSG00000031492	Chrnb3	5730417K16Rik|Acrb3	cholinergic receptor, nicotinic, beta polypeptide 3	protein-coding
chr16	97778555	97779037	Intergenic	Intergenic	-15017	NM_023663	72388	Mm.35290	NM_023663	ENSMUSG00000005251	Ripk4	2310069J12Rik|AI552420|ANKK2|Ankrd3|DIk|PKK|RIP4	receptor-interacting serine-threonine kinase 4	protein-coding
chr4	137468340	137468815	promoter-TSS (NM_008305)	promoter-TSS (NM_008305)	-226	NM_008305	15530	Mm.273662	NM_008305	ENSMUSG00000028763	Hspg2	AI852380|HSPG|Pcn|Plc|per	perlecan (heparan sulfate proteoglycan 2)	protein-coding
chr1	24137214	24137485	Intergenic	Intergenic	-37008	NM_026604	68187	Mm.87130	NM_026604	ENSMUSG00000026153	Fam135a	4921533L14Rik|AI256732|AI835491	family with sequence similarity 135, member A	protein-coding
chr9	20651649	20652108	promoter-TSS (NM_023371)	promoter-TSS (NM_023371)	-240	NM_023371	23988	Mm.7906	NM_023371	ENSMUSG00000032171	Pin1	0610025L01Rik|D9Bwg1161e	protein (peptidyl-prolyl cis/trans isomerase) NIMA-interacting 1	protein-coding
chr9	67571693	67571929	Intergenic	(CACTG)n|Simple_repeat|Simple_repeat	-12108	NM_001081242	70549	Mm.33645	NM_027458	ENSMUSG00000052698	Tln2	5730421P04Rik|AI507121|AI787438|AL118320|mKIAA0320	talin 2	protein-coding
chr10	70946030	70946544	intron (NM_001347189, intron 13 of 21)	intron (NM_001347189, intron 13 of 21)	213403	NM_031397	83675	Mm.286834	NM_031397	ENSMUSG00000014329	Bicc1	Bic-C|bpk|jcpk	BicC family RNA binding protein 1	protein-coding
chr6	124828782	124829679	promoter-TSS (NM_013538)	promoter-TSS (NM_013538)	254	NM_001326594	22225	Mm.3571	NM_013700	ENSMUSG00000038429	Usp5	AA407472|ISOT|ISOT-1|Ucht	ubiquitin specific peptidase 5 (isopeptidase T)	protein-coding
chr17	24960204	24961108	promoter-TSS (NM_198937)	promoter-TSS (NM_198937)	-33	NM_198937	52009	Mm.371601	NM_198937	ENSMUSG00000024165	Jpt2	2810430B18Rik|AL022629|C16orf34|D17Ertd441e|Hn1l	Jupiter microtubule associated homolog 2	protein-coding
chr5	72491759	72492283	intron (NM_001122756, intron 1 of 21)	ORR1B2|LTR|ERVL-MaLR	12187	NM_016869	53419	Mm.332425	NM_016869	ENSMUSG00000005220	Corin	AV273130|Lrp4	corin, serine peptidase	protein-coding
chr14	43249660	43250558	Intergenic	Intergenic	-24927	NR_154584	108168154	Mm.57578	NM_028535		Gm9732	100041143|73415|Gm3161	predicted gene 9732	ncRNA
chr5	148012303	148012576	intron (NM_029920, intron 1 of 14)	ORR1B1|LTR|ERVL-MaLR	55119	NM_029920	77521	Mm.244177	NM_029920	ENSMUSG00000029651	Mtus2	5730592G18Rik|A730013O20Rik|AU067634|C130038G02Rik|Cazip|Gm763|mKIAA0774	microtubule associated tumor suppressor candidate 2	protein-coding
chr3	68582571	68582846	intron (NM_013928, intron 1 of 6)	intron (NM_013928, intron 1 of 6)	10340	NM_013928	30953	Mm.331064	NM_013928	ENSMUSG00000027777	Schip1	Nf2ip|Schip-1	schwannomin interacting protein 1	protein-coding
chr5	34573283	34574216	promoter-TSS (NM_001331086)	promoter-TSS (NM_001331086)	85	NM_001024458	11518	Mm.289106	NM_013457	ENSMUSG00000029106	Add1	AI256389	adducin 1 (alpha)	protein-coding
chr15	93275182	93275503	promoter-TSS (NM_001033275)	promoter-TSS (NM_001033275)	-163	NM_001357006	223827	Mm.22819	NM_001033275	ENSMUSG00000036197	Gxylt1	Glt8d3|Gm1228|Gm87	glucoside xylosyltransferase 1	protein-coding
chr17	86150927	86151330	Intergenic	Intergenic	-5953	NM_030133	78586	Mm.146236	NM_030133	ENSMUSG00000024135	Srbd1	AI461933|C85414|D530025C17Rik	S1 RNA binding domain 1	protein-coding
chr6	47676455	47676648	TTS (NR_002841).7	TTS (NR_002841).7	186	NR_002841	19799		NR_002841		Rn4.5s	-	4.5S RNA	rRNA
chr10	76961743	76962397	promoter-TSS (NM_021568)	promoter-TSS (NM_021568)	-123	NM_001347216	59093	Mm.272803	NM_021568	ENSMUSG00000001120	Pcbp3	AlphaCP-3	poly(rC) binding protein 3	protein-coding
chr2	155901703	155902125	intron (NM_001355441, intron 5 of 9)	intron (NM_001355441, intron 5 of 9)	28396	NM_001355443	56046	Mm.158827	NM_018888	ENSMUSG00000005882	Uqcc1	2310079L17Rik|2410003P15Rik|3110038N19Rik|Bfzb|Bfzp|Cbp3|Uqcc	ubiquinol-cytochrome c reductase complex assembly factor 1	protein-coding
chr1	80340753	80341385	promoter-TSS (NM_001313728)	promoter-TSS (NM_001313728)	-379	NM_001313728	26554	Mm.12665	NM_016716	ENSMUSG00000004364	Cul3	KIAA0617	cullin 3	protein-coding
chr11	61761866	61762345	promoter-TSS (NM_001164244)	promoter-TSS (NM_001164244)	-17	NM_001164244	212627	Mm.27703	NM_144806	ENSMUSG00000020528	Prpsap2	A230054F23Rik|PAP41	phosphoribosyl pyrophosphate synthetase-associated protein 2	protein-coding
chr2	169304333	169304872	Intergenic	Intergenic	326333	NR_040326	75508	Mm.271256	NR_040326	ENSMUSG00000086348	1700017J07Rik	-	RIKEN cDNA 1700017J07 gene	ncRNA
chr13	110406232	110406620	Intergenic	Intergenic	11382	NM_152804	20620	Mm.380	NM_152804	ENSMUSG00000021701	Plk2	Snk	polo like kinase 2	protein-coding
chr17	27707907	27708426	intron (NM_178365, intron 9 of 9)	intron (NM_178365, intron 9 of 9)	20785	NM_013891	30051	Mm.26768	NM_013891	ENSMUSG00000024215	Spdef	PDEF|Pse	SAM pointed domain containing ets transcription factor	protein-coding
chr2	172714315	172714756	Intergenic	Intergenic	163544	NM_001159696	21420	Mm.3629	NM_009335	ENSMUSG00000028640	Tfap2c	AA409384|AP2gamma|Ap-2.2|Stra2|Tcfap2c	transcription factor AP-2, gamma	protein-coding
chr8	77098113	77098500	intron (NM_001083906, intron 3 of 8)	intron (NM_001083906, intron 3 of 8)	195976	NM_001083906	110784	Mm.324393	NM_001083906	ENSMUSG00000031618	Nr3c2	MR|Mlr	nuclear receptor subfamily 3, group C, member 2	protein-coding
chr1	177982962	177984100	Intergenic	CpG	-7867	NR_160909	545391	Mm.442974	NM_001034899	ENSMUSG00000091476	Catspere2	Gm16432|Gm30473	cation channel sperm associated auxiliary subunit epsilon 2	protein-coding
chr8	24338765	24339049	Intergenic	Intergenic	100039	NM_026931	69068	Mm.25775	NM_026931	ENSMUSG00000056313	Tcim	1110065B09Rik|1810011O10Rik|AW121743|AW321058	transcriptional and immune response regulator	protein-coding
chr7	111082914	111083567	promoter-TSS (NM_013507)	promoter-TSS (NM_013507)	-210	NM_013507	13690	Mm.185453	NM_013507	ENSMUSG00000005610	Eif4g2	DAP-5|E130105L11Rik|Nat1|Natm1|p97	eukaryotic translation initiation factor 4, gamma 2	protein-coding
chr12	69159129	69159942	promoter-TSS (NM_009093)	promoter-TSS (NM_009093)	-349	NM_009093	20090	Mm.379006	NM_009093	ENSMUSG00000034892	Rps29	-	ribosomal protein S29	protein-coding
chr2	135709624	135709923	intron (NM_001355153, intron 1 of 38)	C-rich|Low_complexity|Low_complexity	50226	NM_001355156	18798	Mm.38009	NM_013829	ENSMUSG00000039943	Plcb4	A930039J07Rik|AI854601|C230058B11Rik	phospholipase C, beta 4	protein-coding
chr14	82722783	82723229	Intergenic	Intergenic	1352284	NR_153783	102635012	Mm.399509	NR_153783	ENSMUSG00000115043	Gm32455	-	predicted gene, 32455	ncRNA
chr1	76570493	76570766	Intergenic	Intergenic	61069	NR_105761	102465175		NR_105761	ENSMUSG00000098611	Mir6343	Gm27304|mmu-mir-6343	microRNA 6343	ncRNA
chr17	70025536	70025872	intron (NM_001347411, intron 1 of 14)	ORR1B2|LTR|ERVL-MaLR	56631	NM_001360665	224997	Mm.311840	NM_027712	ENSMUSG00000003279	Dlgap1	4933422O14Rik|9630002F18|AI845682|AI848168|BB075781|D17Bwg0511e|GKAP/SAPAP|GKPA/SAPAP|Gkap|Sapap1|mKIAA4162	DLG associated protein 1	protein-coding
chr7	39552183	39552877	Intergenic	CpG	34764	NM_001004139	70227	Mm.333800	NM_001004139	ENSMUSG00000068959	Zfp619	3000002G13Rik	zinc finger protein 619	protein-coding
chrX	136957910	136958385	promoter-TSS (NM_001080967)	promoter-TSS (NM_001080967)	-168	NM_001080967	100034363	Mm.381904	NM_001080967	ENSMUSG00000089996	Tmsb15b2	Tb15c	thymosin beta 15b2	protein-coding
chr3	118561935	118562538	promoter-TSS (NM_170778)	promoter-TSS (NM_170778)	56	NM_170778	99586	Mm.27907	NM_170778	ENSMUSG00000033308	Dpyd	AI315208|DHPDHase|DPD|E330028L06Rik	dihydropyrimidine dehydrogenase	protein-coding
chr14	90172769	90173203	intron (NR_045712, intron 4 of 8)	Lx4B|LINE|L1	46095	NR_045712	74967	Mm.390704	NR_045712	ENSMUSG00000115001	4930474H20Rik	-	RIKEN cDNA 4930474H20 gene	ncRNA
chr18	67288882	67289344	promoter-TSS (NM_053261)	promoter-TSS (NM_053261)	-134	NM_053261	114663	Mm.34079	NM_053261	ENSMUSG00000024525	Impa2	2210415D20Rik|AI326924|AW259601|IMP 2|IMPase 2	inositol (myo)-1(or 4)-monophosphatase 2	protein-coding
chr10	126681044	126681330	Intergenic	Intergenic	29204	NR_105841	102465224		NR_105841	ENSMUSG00000098756	Mir378d	Gm27650|mmu-mir-378d	microRNA 378d	ncRNA
chr18	73447748	73448010	Intergenic	Intergenic	-124826	NM_001039214	240396	Mm.24131	NM_001039214	ENSMUSG00000037253	Mex3c	A130001D14Rik|BC035207|BM-013|Rkhd2	mex3 RNA binding family member C	protein-coding
chr1	179645603	179646066	Intergenic	Intergenic	-22397	NM_178653	109232	Mm.136458	NM_178653	ENSMUSG00000038936	Sccpdh	AW214504|C330023F11Rik	saccharopine dehydrogenase (putative)	protein-coding
chr10	68611659	68612184	Intergenic	B3|SINE|B2	-70046	NM_028491	73287	Mm.141830	NM_028491	ENSMUSG00000019945	Cabcoco1	1700040L02Rik	ciliary associated calcium binding coiled-coil 1	protein-coding
chr2	31688058	31688339	promoter-TSS (NM_001112703)	promoter-TSS (NM_001112703)	271	NR_153862	108168742	Mm.416860	NR_153862		Gm13427	-	predicted gene 13427	ncRNA
chrX	164028000	164028286	promoter-TSS (NM_181315)	promoter-TSS (NM_181315)	-133	NM_181315	56078	Mm.180953	NM_181315	ENSMUSG00000031373	Car5b	7330410H16Rik|CAVB|Ca5b|CarVb|D730005F19Rik	carbonic anhydrase 5b, mitochondrial	protein-coding
chr15	27247089	27247346	Intergenic	Intergenic	-219460	NM_020332	11732	Mm.265264	NM_020332	ENSMUSG00000022265	Ank	Ankh|D15Ertd221e|ank|mKIAA1581	progressive ankylosis	protein-coding
chr13	69594731	69595226	exon (NM_175283, exon 3 of 5)	exon (NM_175283, exon 3 of 5)	16485	NM_175283	78925	Mm.451912	NM_175283	ENSMUSG00000021594	Srd5a1	0610031P22Rik|4930435F02Rik|S5AR 1|Srd5a-1	steroid 5 alpha-reductase 1	protein-coding
chr18	21952987	21953376	intron (NM_027616, intron 20 of 22)	RLTR26_Mus|LTR|ERVK	218215	NM_027616	70950	Mm.235716	NM_027616	ENSMUSG00000024306	Ccdc178	4921528I01Rik	coiled coil domain containing 178	protein-coding
chr8	30840129	30840396	Intergenic	Intergenic	-249265	NM_025869	66959	Mm.23916	NM_025869	ENSMUSG00000039661	Dusp26	2310043K02Rik|Skrp3	dual specificity phosphatase 26 (putative)	protein-coding
chr11	90002494	90003175	promoter-TSS (NM_008796)	promoter-TSS (NM_008796)	60	NM_008796	18559	Mm.5062	NM_008796	ENSMUSG00000020553	Pctp	PC-TP|StarD2	phosphatidylcholine transfer protein	protein-coding
chr19	41680282	41680566	intron (NM_015748, intron 4 of 36)	intron (NM_015748, intron 4 of 36)	63432	NM_015748	20562	Mm.39155	NM_015748	ENSMUSG00000025020	Slit1	Slil1|mKIAA0813	slit guidance ligand 1	protein-coding
chr19	58011757	58012080	intron (NM_181415, intron 27 of 28)	intron (NM_181415, intron 27 of 28)	-39249	NR_049196	100885835		NR_049196	ENSMUSG00000093757	Mir5623	Gm26068|mir-5623|mmu-mir-5623	microRNA 5623	ncRNA
chr3	100316356	100316589	Intergenic	(TTAGGG)n|Simple_repeat|Simple_repeat	-109933	NR_040543	73806	Mm.396549	NR_040543	ENSMUSG00000086923	4930406D18Rik	-	RIKEN cDNA 4930406D18 gene	ncRNA
chr16	15671250	15671777	intron (NM_011159, intron 15 of 85)	(CTCTG)n|Simple_repeat|Simple_repeat	33647	NM_011159	19090	Mm.71	NM_011159	ENSMUSG00000022672	Prkdc	AI326420|AU019811|DNA-PKcs|DNAPDcs|DNAPK|DNPK1|DOXNPH|HYRC1|XRCC7|dxnph|p460|scid|slip	protein kinase, DNA activated, catalytic polypeptide	protein-coding
chr17	51305010	51305310	intron (NR_037264, intron 3 of 4)	intron (NR_037264, intron 3 of 4)	27172	NR_037259	100526489		NR_037259	ENSMUSG00000104652	Mir669a-8	mmu-mir-669a-8	microRNA 669a-8	ncRNA
chr13	62382958	62383439	promoter-TSS (NM_001162910)	promoter-TSS (NM_001162910)	-24	NM_001162910	100041979	Mm.445930	NM_001162910	ENSMUSG00000094942	Gm3604	-	predicted gene 3604	protein-coding
chr11	33623282	33623881	Intergenic	Intergenic	-44624	NM_146017	216643	Mm.99989	NM_146017	ENSMUSG00000020159	Gabrp	-	gamma-aminobutyric acid (GABA) A receptor, pi	protein-coding
chrY	3305122	3305546	intron (NM_011253, intron 1 of 9).5	intron (NM_011253, intron 1 of 9).5	1115	NM_001270514	100862383	Mm.4711	NM_001270514	ENSMUSG00000094511	Gm21693	-	predicted gene, 21693	protein-coding
chr14	59025832	59026094	Intergenic	RLTR44C|LTR|ERVK	116930	NM_026461	67932	Mm.65550	NM_026461	ENSMUSG00000021977	1700129C05Rik	-	RIKEN cDNA 1700129C05 gene	protein-coding
chr7	128199525	128199754	intron (NM_001029872, intron 24 of 30)	(TCCTG)n|Simple_repeat|Simple_repeat	3689	NR_045183	70973	Mm.441564	NR_045183	ENSMUSG00000108354	4931431B13Rik	1700108I23Rik|AA536668	RIKEN cDNA 4931431B13 gene	ncRNA
chr3	146450193	146450659	promoter-TSS (NM_028836)	promoter-TSS (NM_028836)	-41	NM_001293672	74245	Mm.45396	NM_028836	ENSMUSG00000028189	Ctbs	2210401K11Rik|CTB	chitobiase	protein-coding
chr11	20200786	20201459	promoter-TSS (NM_008996)	promoter-TSS (NM_008996)	-290	NM_008996	19324	Mm.271944	NM_008996	ENSMUSG00000020149	Rab1a	Gtbp|Rab-1|Rab1|Ypt1|mKIAA3012	RAB1A, member RAS oncogene family	protein-coding
chr14	121731736	121732325	intron (NM_134074, intron 1 of 52)	intron (NM_134074, intron 1 of 52)	6899	NM_001128308	105445	Mm.378591	NM_134074	ENSMUSG00000025558	Dock9	AA959601|AW538057|B230309H04Rik|D14Wsu89e|Zizimin1|mKIAA1058	dedicator of cytokinesis 9	protein-coding
chr2	3512634	3513223	promoter-TSS (NM_177647)	promoter-TSS (NM_177647)	-114	NR_149715	50497	Mm.89341	NM_015765	ENSMUSG00000051396	Hspa14	70kDa|HSP70L1|Hsp70-4|NST-1|hsr.1	heat shock protein 14	protein-coding
chr17	78492013	78492629	Intergenic	Intergenic	-15742	NM_028813	74199	Mm.292983	NM_028813	ENSMUSG00000024076	Vit	1700052E02Rik|1700110E08Rik|2810429K11Rik|AKH|akhirin	vitrin	protein-coding
chr11	98058036	98058366	Intergenic	MTD|LTR|ERVL-MaLR	-4739	NM_146028	217154	Mm.181008	NM_146028	ENSMUSG00000017400	Stac2	24b2|24b2/STAC2|AW240854	SH3 and cysteine rich domain 2	protein-coding
chr6	127616751	127617069	intron (NM_001368877, intron 6 of 18)	intron (NM_001368877, intron 6 of 18)	55574	NM_001033464	381812	Mm.296093	NM_001033464	ENSMUSG00000061414	Cracr2a	Efcab4b|Gm1073|Gm462	calcium release activated channel regulator 2A	protein-coding
chr3	34454138	34454419	Intergenic	CpG	-106103	NR_015580	320478	Mm.444063	NR_015580	ENSMUSG00000105265	Sox2ot	B230215L15Rik	SOX2 overlapping transcript (non-protein coding)	ncRNA
chr6	82946667	82947157	promoter-TSS (NM_033079)	promoter-TSS (NM_033079)	-10	NM_033079	110958	Mm.100652	NM_033079	ENSMUSG00000030041	M1ap	D6Mm5e	meiosis 1 associated protein	protein-coding
chr19	26875233	26875554	Intergenic	Intergenic	-10532	NM_001033407	329047	Mm.293289	NM_001033407	ENSMUSG00000074913	Gm815	-	predicted gene 815	protein-coding
chr11	53980093	53980669	promoter-TSS (NM_019723)	promoter-TSS (NM_019723)	-48	NM_001362202	56517	Mm.154284	NM_019723	ENSMUSG00000063652	Slc22a21	Octn3|Slc22a9	solute carrier family 22 (organic cation transporter), member 21	protein-coding
chr14	6037082	6037370	Intergenic	Intergenic	-229287	NM_001291094	100041515	Mm.443041	NM_001205306	ENSMUSG00000096629	Gm3383	-	predicted gene 3383	protein-coding
chr13	48546508	48546902	Intergenic	CpG	-8433	NR_029725	387244		NR_029725	ENSMUSG00000065421	Mirlet7a-1	Let-7a|Mirnlet7a|Mirnlet7a-1|let-7a-1	microRNA let7a-1	ncRNA
chr8	57571518	57572071	intron (NM_001167981, intron 2 of 11)	G-rich|Low_complexity|Low_complexity	59951	NM_008252	97165	Mm.276881	NM_008252	ENSMUSG00000054717	Hmgb2	C80539|HMG-2|Hmg2	high mobility group box 2	protein-coding
chr12	32075379	32075844	Intergenic	Intergenic	-14334	NM_011158	19088	Mm.25594	NM_011158	ENSMUSG00000002997	Prkar2b	AI451071|AW061005|PKARIIbeta|Pkarb2|RII(beta)	protein kinase, cAMP dependent regulatory, type II beta	protein-coding
chr15	92051047	92051514	5' UTR (NM_001159648, exon 1 of 24)	5' UTR (NM_001159648, exon 1 of 24)	115	NM_001358051	12805	Mm.4911	NM_007727	ENSMUSG00000055022	Cntn1	AW495098|CNTN|F3cam|usl	contactin 1	protein-coding
chr2	93462358	93462987	promoter-TSS (NM_001271461)	promoter-TSS (NM_001271461)	-170	NM_001271432	12521	Mm.4261	NM_007656	ENSMUSG00000027215	Cd82	AA682076|AL023070|C33|IA4|Kai1|Tspan27	CD82 antigen	protein-coding
chr5	114175609	114176055	intron (NM_133904, intron 1 of 51)	intron (NM_133904, intron 1 of 51)	10314	NM_133904	100705	Mm.81793	NM_133904	ENSMUSG00000042010	Acacb	AI597064|AW743042|Acc2|Accb	acetyl-Coenzyme A carboxylase beta	protein-coding
chr8	83972631	83973054	promoter-TSS (NM_008854)	promoter-TSS (NM_008854)	-136	NM_008854	18747	Mm.19111	NM_008854	ENSMUSG00000005469	Prkaca	PKCD|Pkaca	protein kinase, cAMP dependent, catalytic, alpha	protein-coding
chr9	49873484	49873902	Intergenic	Intergenic	-74300	NM_001311065	17967	Mm.4974	NM_010875	ENSMUSG00000039542	Ncam1	CD56|E-NCAM|NCAM-1|Ncam	neural cell adhesion molecule 1	protein-coding
chr3	157924874	157925357	promoter-TSS (NM_145953)	promoter-TSS (NM_145953)	-52	NM_145953	107869	Mm.28301	NM_145953	ENSMUSG00000028179	Cth	0610010I13Rik|AI314617|BC019483|CSE|Cys3	cystathionase (cystathionine gamma-lyase)	protein-coding
chr1	82292810	82293162	Intergenic	Intergenic	-1547	NM_010570	16367	Mm.4952	NM_010570	ENSMUSG00000055980	Irs1	G972R|IRS-1	insulin receptor substrate 1	protein-coding
chr17	24850055	24850588	promoter-TSS (NM_001159626)	promoter-TSS (NM_001159626)	-19	NM_023480	68636	Mm.347964	NM_023480	ENSMUSG00000045316	Fahd1	1110025H10Rik|AV002085	fumarylacetoacetate hydrolase domain containing 1	protein-coding
chr8	120518615	120519131	intron (NM_198671, intron 1 of 15)	intron (NM_198671, intron 1 of 15)	-16984	NM_001145897	382034	Mm.334856	NM_198671	ENSMUSG00000031822	Gse1	2210013I18Rik|mKIAA0182	genetic suppressor element 1, coiled-coil protein	protein-coding
chr11	121925296	121925706	Intergenic	Intergenic	95283	NM_029049	74675	Mm.61213	NM_029049	ENSMUSG00000039198	Ptchd3	4930451E13Rik|4933440L20Rik|RNDEu-3	patched domain containing 3	protein-coding
chr18	36274551	36275312	Intergenic	Intergenic	-6174	NM_008989	19290	Mm.44643	NM_008989	ENSMUSG00000043991	Pura	6330411E07Rik|CAGER-1|Pur-alpha|ssCRE-BP	purine rich element binding protein A	protein-coding
chr3	103714587	103714923	Intergenic	Intergenic	23246	NM_133859	99543	Mm.211535	NM_133859	ENSMUSG00000027848	Olfml3	2810002E22Rik|AI115209|AW550633|HNOEL-iso|ONT3|mONT3	olfactomedin-like 3	protein-coding
chr10	81137302	81137623	intron (NM_010731, intron 1 of 2)	CpG	1191	NM_010731	16969	Mm.20920	NM_010731	ENSMUSG00000035011	Zbtb7a	9030619K07Rik|9130006G12Rik|AI452336|FBI-1|Lrf|Pokemon|Zbtb7	zinc finger and BTB domain containing 7a	protein-coding
chr6	47744096	47744496	promoter-TSS (NR_002841).2	promoter-TSS (NR_002841).2	-65	NR_002841	19799		NR_002841		Rn4.5s	-	4.5S RNA	rRNA
chr8	14664438	14665054	intron (NM_001145965, intron 3 of 14)	MLT1C|LTR|ERVL-MaLR	-223790	NM_012000	26889	Mm.254027	NM_012000	ENSMUSG00000026317	Cln8	mnd	ceroid-lipofuscinosis, neuronal 8	protein-coding
chr6	47667819	47668046	TTS (NR_002841).5	TTS (NR_002841).5	159	NR_002841	19799		NR_002841		Rn4.5s	-	4.5S RNA	rRNA
chr16	49698872	49699705	promoter-TSS (NM_028680)	promoter-TSS (NM_028680)	-6	NM_028680	73916	Mm.241276	NM_028680	ENSMUSG00000032965	Ift57	4833420A15Rik|Esrrbl1|Hippi|MHS4R2	intraflagellar transport 57	protein-coding
chr1	161303026	161303449	Intergenic	Intergenic	-52027	NR_130150	11758	Mm.186185	NM_007453	ENSMUSG00000026701	Prdx6	1-Cys Prx|1-cysPrx|9430088D19Rik|AA690119|Aop2|Brp-12|CP-3|GPx|Ltw-4|Ltw4|Lvtw-4|NSGPx|ORF06|Prdx5|aiPLA2	peroxiredoxin 6	protein-coding
chr5	92675231	92675946	promoter-TSS (NM_001360018)	promoter-TSS (NM_001360018)	-317	NM_001360019	320696	Mm.209991	NM_177230	ENSMUSG00000050050	Ccdc158	4932413O14Rik	coiled-coil domain containing 158	protein-coding
chr12	36042123	36042827	promoter-TSS (NM_025359)	promoter-TSS (NM_025359)	3	NM_025359	66109	Mm.254663	NM_025359	ENSMUSG00000020577	Tspan13	1100001I23Rik|NET-6|Tm4sf13	tetraspanin 13	protein-coding
chr9	22070694	22071043	promoter-TSS (NR_040406)	promoter-TSS (NR_040406)	-134	NR_040406	100503652	Mm.439941	NR_040406	ENSMUSG00000096981	Gm16845	-	predicted gene, 16845	ncRNA
chr7	35537652	35537995	promoter-TSS (NM_028034)	promoter-TSS (NM_028034)	-79	NM_028034	71981	Mm.47904	NM_028034	ENSMUSG00000030491	Tdrd12	2410004F06Rik|2410070K17Rik|ECAT8|EG434165|G1-476-14|repro23	tudor domain containing 12	protein-coding
chr12	105524667	105524897	Intergenic	(CCCTAA)n|Simple_repeat|Simple_repeat	11349	NR_102381	104932	Mm.274150	NR_102381		AU015791	-	expressed sequence AU015791	ncRNA
chr1	193035269	193036190	promoter-TSS (NM_001301370)	promoter-TSS (NM_001301370)	46	NM_001301370	329324	Mm.76710	NM_181546	ENSMUSG00000016200	Syt14	B230320I09Rik|sytXIV	synaptotagmin XIV	protein-coding
chr8	122217642	122218049	Intergenic	Intergenic	-12429	NM_001362883	195209	Mm.102191	NM_001362883		Zfp469	Gm22	zinc finger protein 469	protein-coding
chr4	78606414	78606768	Intergenic	Intergenic	12544	NR_131142	623726		NR_131142		A430085M09Rik	EG623726	RIKEN cDNA A430085M09 gene	ncRNA
chr5	104571329	104571901	promoter-TSS (NM_001346672)	promoter-TSS (NM_001346672)	-57	NM_001346671	69623	Mm.69919	NM_027142		Zfp33b	2310012P17Rik	zinc finger protein 33B	protein-coding
chr4	151861837	151862601	promoter-TSS (NM_001195565)	promoter-TSS (NM_001195565)	-451	NM_001195565	100072	Mm.318846	NM_001081557	ENSMUSG00000014592	Camta1	1810059M14Rik|2310058O09Rik|AI316882|AW987475|mKIAA0833	calmodulin binding transcription activator 1	protein-coding
chr2	178078009	178078682	promoter-TSS (NM_001162922)	promoter-TSS (NM_001162922)	80	NM_001162922	353208	Mm.381194	NM_001162922	ENSMUSG00000078861	Zfp931	2810021G02Rik	zinc finger protein 931	protein-coding
chr11	87108611	87109306	promoter-TSS (NM_025377)	promoter-TSS (NM_025377)	-244	NM_175563	270906	Mm.132381	NM_175563	ENSMUSG00000020493	Prr11	B930067F20Rik	proline rich 11	protein-coding
chr7	18997121	18997417	intron (NM_145579, intron 2 of 2)	ZP3AR|Satellite|Satellite	6024	NM_145579	232934	Mm.440069	NM_145579	ENSMUSG00000048481	Mypop	Myodysa|P42pop	Myb-related transcription factor, partner of profilin	protein-coding
chr17	84947065	84947424	intron (NR_027929, intron 2 of 3)	intron (NR_027929, intron 2 of 3)	-9497	NM_001159497	19043	Mm.249695	NM_011151	ENSMUSG00000061130	Ppm1b	PP2CB	protein phosphatase 1B, magnesium dependent, beta isoform	protein-coding
chr19	41802021	41802219	promoter-TSS (NM_027667)	promoter-TSS (NM_027667)	-36	NM_027667	71085	Mm.21646	NM_027667	ENSMUSG00000025154	Arhgap19	4933411B03Rik|AI120128|AW546831|mFLJ00368	Rho GTPase activating protein 19	protein-coding
chr7	79272633	79273332	promoter-TSS (NM_018811)	promoter-TSS (NM_018811)	-284	NM_018811	54608	Mm.365490	NM_018811	ENSMUSG00000039202	Abhd2	2210009N18Rik|LABH2|Labh-2	abhydrolase domain containing 2	protein-coding
chr7	42692438	42693011	promoter-TSS (NM_001008427)	promoter-TSS (NM_001008427)	-6	NM_001008427	434179	Mm.284947	NM_001008427	ENSMUSG00000069727	Zfp975	EG434179|Gm5595|mszf88	zinc finger protein 975	protein-coding
chr5	21700993	21701927	promoter-TSS (NM_001359963)	promoter-TSS (NM_001359963)	-64	NM_178728	242864	Mm.153292	NM_178728	ENSMUSG00000044968	Napepld	A530089G06|Mbldc1|NAPE-PLD	N-acyl phosphatidylethanolamine phospholipase D	protein-coding
chr6	8508809	8509396	promoter-TSS (NM_133236)	promoter-TSS (NM_133236)	59	NR_040452	320312	Mm.374890	NR_040452	ENSMUSG00000087305	A430035B10Rik	2810488G03Rik	RIKEN cDNA A430035B10 gene	ncRNA
chr17	69225734	69226450	intron (NM_001355734, intron 3 of 22)	RLTR16|LTR|ERVK	51114	NR_045428	69750	Mm.439063	NR_045428	ENSMUSG00000100572	2410021H03Rik	-	RIKEN cDNA 2410021H03 gene	ncRNA
chr8	110500278	110500627	intron (NR_105058, intron 2 of 2)	intron (NR_105058, intron 2 of 2)	1904	NR_105058	100861869	Mm.84499	NR_105058		Gm21283	-	predicted gene, 21283	ncRNA
chr11	16951007	16951554	promoter-TSS (NM_176982)	promoter-TSS (NM_176982)	2	NR_110425	72735	Mm.268598	NR_015469		Eldr	2810442I21Rik|4930500E12Rik|Fabl	Egfr long non-coding downstream RNA	ncRNA
chr3	28409214	28409513	intron (NM_001163009, intron 2 of 30)	intron (NM_001163009, intron 2 of 30)	-10580	NR_130342	100628591		NR_130342	ENSMUSG00000092990	Mir466q	Mir446q|mmu-mir-466q|mu-mir-446q	microRNA 466q	ncRNA
chr7	16264062	16264684	Intergenic	ZP3AR|Satellite|Satellite	-4833	NM_007577	12273	Mm.247623	NM_007577	ENSMUSG00000049130	C5ar1	C5aR|C5r1|Cd88|D7Msu1	complement component 5a receptor 1	protein-coding
chr4	152138550	152139157	exon (NM_207687, exon 4 of 16)	exon (NM_207687, exon 4 of 16)	-2528	NM_207690	56226	Mm.264215	NM_019585	ENSMUSG00000028943	Espn	je	espin	protein-coding
chr15	100614876	100615674	promoter-TSS (NM_011873)	promoter-TSS (NM_011873)	-165	NR_045701	78445	Mm.44383	NR_045701	ENSMUSG00000097093	C330013E15Rik	-	RIKEN cDNA C330013E15 gene	ncRNA
chr18	46836809	46837216	Intergenic	LTR33|LTR|ERVL	-13027	NM_029008	74574	Mm.26379	NM_029008	ENSMUSG00000024481	Lvrn	4833403I15Rik|APQ|Aqpep	laeverin	protein-coding
chr14	76671378	76671766	Intergenic	Intergenic	-5996	NR_015485	73272	Mm.116804	NR_015485	ENSMUSG00000101009	1700108F19Rik	1700020I02Rik|BB065030	RIKEN cDNA 1700108F19 gene	ncRNA
chrM	73	1246	NA	Intergenic	NA	NA
chr6	72414109	72414514	promoter-TSS (NM_019802)	promoter-TSS (NM_019802)	3	NM_019802	56316	Mm.19937	NM_019802	ENSMUSG00000053460	Ggcx	-	gamma-glutamyl carboxylase	protein-coding
chr18	12973792	12974539	promoter-TSS (NM_001357396)	promoter-TSS (NM_001357396)	-295	NM_001357396	16210	Mm.8154	NM_008378	ENSMUSG00000024423	Impact	E430016J11Rik	impact, RWD domain protein	protein-coding
chr7	42878151	42878577	Intergenic	Intergenic	-11130	NR_046214	100039706	Mm.260936	NR_046214	ENSMUSG00000092225	Gm2381	-	zinc finger protein 936 pseudogene	pseudo
chr17	83224575	83224985	3' UTR (NM_134117, exon 7 of 7)	3' UTR (NM_134117, exon 7 of 7)	9497	NM_134117	106522	Mm.311974	NM_134117	ENSMUSG00000024247	Pkdcc	AI115348|AW548124|Adtk1|ESTM17|MAd1|Sgk493|Vlk|X83346	protein kinase domain containing, cytoplasmic	protein-coding
chr10	99405395	99405813	Intergenic	ORR1B2|LTR|ERVL-MaLR	142373	NM_026268	67603	Mm.1791	NM_026268	ENSMUSG00000019960	Dusp6	1300019I03Rik|MKP-3|MKP3|PYST1	dual specificity phosphatase 6	protein-coding
chr2	32982008	32982400	promoter-TSS (NM_001356409)	promoter-TSS (NM_001356409)	-121	NM_001356409	56017	Mm.305754	NM_019488	ENSMUSG00000026791	Slc2a8	D2Ertd44e|GLUT8|GlutX1	solute carrier family 2, (facilitated glucose transporter), member 8	protein-coding
chr13	115742176	115742460	Intergenic	(CCCTAA)n|Simple_repeat|Simple_repeat	567370	NM_021459	16392	Mm.42242	NM_021459	ENSMUSG00000042258	Isl1	-	ISL1 transcription factor, LIM/homeodomain	protein-coding
chr14	65089368	65089780	intron (NM_018788, intron 1 of 6)	intron (NM_018788, intron 1 of 6)	8532	NM_018788	54616	Mm.103748	NM_018788	ENSMUSG00000021978	Extl3	2900009G18Rik|AU040105|Ext1l|mKIAA0519	exostoses (multiple)-like 3	protein-coding
chr2	154462237	154462529	intron (NM_001285446, intron 1 of 10)	B3|SINE|B2	25899	NM_001285446	12396	Mm.29914	NM_009823	ENSMUSG00000038533	Cbfa2t2	A430091M07|C330013D05Rik|Cbfa2t2h|MTGR1	CBFA2/RUNX1 translocation partner 2	protein-coding
chr17	87106986	87107540	promoter-TSS (NM_019654)	promoter-TSS (NM_019654)	-416	NM_019654	56468	Mm.126885	NM_019654	ENSMUSG00000037104	Socs5	1810018L08Rik|Cish5|mKIAA0671	suppressor of cytokine signaling 5	protein-coding
chr3	107740578	107740920	TTS (NM_001113529)	TTS (NM_001113529)	19720	NM_001113530	12977	Mm.795	NM_007778	ENSMUSG00000014599	Csf1	C87615|Csfm|MCSF|op	colony stimulating factor 1 (macrophage)	protein-coding
chr13	49341345	49341619	promoter-TSS (NM_001039180)	promoter-TSS (NM_001039180)	-67	NM_001039179	76895	Mm.197387	NM_029791	ENSMUSG00000037933	Bicd2	-	BICD cargo adaptor 2	protein-coding
chr19	23435726	23436110	intron (NM_174857, intron 2 of 13)	intron (NM_174857, intron 2 of 13)	12404	NM_174857	71738	Mm.50841	NM_174857	ENSMUSG00000033207	Mamdc2	1200015L10Rik|AI591564|mamcan	MAM domain containing 2	protein-coding
chr13	30336233	30336684	5' UTR (NM_177322, exon 1 of 3)	5' UTR (NM_177322, exon 1 of 3)	102	NM_177322	11607	Mm.35062	NM_177322	ENSMUSG00000049115	Agtr1a	1810074K20Rik|AG2S|AI551199|AT1|AT1a|AT2R1|AT2R1A|Agt1ar|Agtr-1a|Agtr1|Angtr-1a	angiotensin II receptor, type 1a	protein-coding
chr4	42262856	42263226	intron (NR_033123, intron 2 of 4).2	intron (NR_033123, intron 2 of 4).2	7310	NM_011335	100042493	Mm.407493	NM_011335	ENSMUSG00000095675	Ccl21b	6CKBAC1|6Ckine|AI159701|CKb9|SLC|Scya21|Scya21a|Scya21c|TCA4	chemokine (C-C motif) ligand 21B (leucine)	protein-coding
chr1	176814165	176814981	promoter-TSS (NM_001357390)	promoter-TSS (NM_001357390)	-87	NM_001357390	76816	Mm.171399	NM_029756	ENSMUSG00000026504	Sdccag8	2700048G21Rik|5730470G24Rik|Cccap	serologically defined colon cancer antigen 8	protein-coding
chr2	76647929	76648508	promoter-TSS (NM_011871)	promoter-TSS (NM_011871)	-191	NM_011871	23992	Mm.277250	NM_011871	ENSMUSG00000002731	Prkra	AV120107|PRK|Pact|RAX|lear	protein kinase, interferon inducible double stranded RNA dependent activator	protein-coding
chr7	4684785	4685337	promoter-TSS (NM_024172)	promoter-TSS (NM_024172)	-80	NM_024172	66245	Mm.6803	NM_024172	ENSMUSG00000063802	Hspbp1	1500019G21Rik	HSPA (heat shock 70kDa) binding protein, cytoplasmic cochaperone 1	protein-coding
chr14	6545757	6546845	Intergenic	Intergenic	210756	NM_001309401	100041151	Mm.396155	NM_001309401	ENSMUSG00000091754	Gm3636	100042043	predicted gene 3636	protein-coding
chr9	98986040	98986815	promoter-TSS (NM_011810)	promoter-TSS (NM_011810)	54	NM_011810	23873	Mm.74605	NM_011810	ENSMUSG00000032463	Faim	-	Fas apoptotic inhibitory molecule	protein-coding
chr3	40893786	40894380	promoter-TSS (NR_160689)	promoter-TSS (NR_160689)	-180	NR_160689	100039027	Mm.482948	NR_038067		Gm2011	-	predicted gene 2011	pseudo
chr12	69361193	69361963	Intergenic	CpG	-4402	NM_025441	66244	Mm.46705	NM_025441	ENSMUSG00000020982	Nemf	1500011I12Rik|4933405E14Rik|Sdccag1	nuclear export mediator factor	protein-coding
chr1	52844482	52845109	promoter-TSS (NM_146108)	promoter-TSS (NM_146108)	-243	NM_146108	227095	Mm.222063	NM_146108	ENSMUSG00000041426	Hibch	2610509I15Rik|HIBYL-COA-H	3-hydroxyisobutyryl-Coenzyme A hydrolase	protein-coding
chr7	143296059	143296944	promoter-TSS (NR_001461)	promoter-TSS (NR_001461)	46	NR_001461	63830	Mm.356096	NR_001461	ENSMUSG00000101609	Kcnq1ot1	Kvlqt1-as|Lit1|Tssc8	KCNQ1 overlapping transcript 1	ncRNA
chr1	24302752	24303063	intron (NM_007733, intron 37 of 50)	intron (NM_007733, intron 37 of 50)	107704	NM_001290691	12839	Mm.154662	NM_007740	ENSMUSG00000026147	Col9a1	Col9a-1	collagen, type IX, alpha 1	protein-coding
chr3	19187887	19188359	promoter-TSS (NM_026182)	promoter-TSS (NM_026182)	13	NM_026182	67472	Mm.45125	NM_026182	ENSMUSG00000027601	Mtfr1	1300002C08Rik|1700080D04Rik|2810026O10Rik|4930579E05Rik|Chppr|Fam54a2	mitochondrial fission regulator 1	protein-coding
chr1	181845282	181845560	Intergenic	Intergenic	-3020	NM_133815	98386	Mm.4538	NM_133815	ENSMUSG00000004880	Lbr	AI505894|C14SR|ic	lamin B receptor	protein-coding
chr9	22002434	22002962	promoter-TSS (NM_001293651)	promoter-TSS (NM_001293651)	-64	NM_001163787	77609	Mm.159953	NM_029939	ENSMUSG00000039632	Ccdc151	AI644415|C330001K17Rik|b2b1885Clo	coiled-coil domain containing 151	protein-coding
chr14	46309533	46309975	Intergenic	RLTR20A4|LTR|ERVK	-69770	NR_037981	100041724	Mm.383311	NM_001099324	ENSMUSG00000079261	Gm15217	-	predicted gene 15217	ncRNA
chr7	43772837	43773279	intron (NM_027097, intron 4 of 4)	intron (NM_027097, intron 4 of 4)	-1559	NM_001177373	56538	Mm.154276	NM_019974	ENSMUSG00000067616	Klk11	2310015I08Rik|Prss20|TLSP	kallikrein related-peptidase 11	protein-coding
chr4	40142802	40143844	promoter-TSS (NM_007386)	promoter-TSS (NM_007386)	58	NM_007386	11428	Mm.331547	NM_007386	ENSMUSG00000028405	Aco1	Aco-1|Irebp|Irp1	aconitase 1	protein-coding
chr16	52031021	52031916	promoter-TSS (NM_001033238)	promoter-TSS (NM_001033238)	-81	NM_001033238	208650	Mm.328206	NM_001033238	ENSMUSG00000022637	Cblb	AI429560|AI851073|Cbl-b	Casitas B-lineage lymphoma b	protein-coding
chr15	9461823	9462079	intron (NM_029341, intron 3 of 4)	intron (NM_029341, intron 3 of 4)	25923	NM_029341	75568	Mm.82143	NM_029341	ENSMUSG00000039676	Capsl	1700028N11Rik|AW125205	calcyphosine-like	protein-coding
chr6	128760462	128761222	Intergenic	Intergenic	27799	NM_008527	17059	Mm.480764	NM_008527	ENSMUSG00000030325	Klrb1c	AI462337|CD161|Klrb1b|Ly-59|Ly55c|Ly59|NK-RP1|NK1.1|NKR-P1.9|NKRP1|NKRP140|Nk-1|Nk-1.2|Nk1|Nk1.2|Nkrp1b|Nkrp1c|ly-55c	killer cell lectin-like receptor subfamily B member 1C	protein-coding
chr3	35994573	35995238	intron (NM_023644, intron 3 of 18)	RLTR26_Mus|LTR|ERVK	-5008	NR_029456	654424	Mm.425130	NM_001039096	ENSMUSG00000086392	Mccc1os	A330050B17Rik	methylcrotonoyl-Coenzyme A carboxylase 1 (alpha), opposite strand	ncRNA
chr3	100921970	100922672	promoter-TSS (NM_001165952)	promoter-TSS (NM_001165952)	-172	NM_194343	229644	Mm.189351	NM_194343	ENSMUSG00000033233	Trim45	4921530N01Rik	tripartite motif-containing 45	protein-coding
chr5	134814760	134815015	Intergenic	ZP3AR|Satellite|Satellite	-67564	NM_007925	13717	Mm.275320	NM_007925	ENSMUSG00000029675	Eln	AI385707|AI480567|E030024M20Rik	elastin	protein-coding
chrX	135574456	135574861	Intergenic	Intergenic	24119	NM_130888	170722	Mm.103373	NM_130888	ENSMUSG00000031410	Nxf7	Nx7|Nxf6|nfx-a1|nxf-a|nxf-a2	nuclear RNA export factor 7	protein-coding
chr6	51006841	51007206	Intergenic	Intergenic	100617	NR_157241	102633851	Mm.393702	NR_157241		Gm31579	Gm44400	predicted gene, 31579	ncRNA
chr9	50739331	50739738	TTS (NM_025865)	TTS (NM_025865)	-1799	NM_001311069	330938	Mm.82598	NM_178118	ENSMUSG00000032064	Dixdc1	4930563F16Rik|BC048182|Ccd1|Ccd1Aalpha1L|Ccd1Abeta1L|Ccd1BalphaL|Ccd1BbetaL|Ccd1CL|mKIAA1735	DIX domain containing 1	protein-coding
chr3	32510303	32510737	promoter-TSS (NM_001356625)	promoter-TSS (NM_001356625)	-30	NM_001161818	67778	Mm.285620	NM_144519	ENSMUSG00000027667	Zfp639	6230400O18Rik|ANC-2H01|ZASC1|Znf639	zinc finger protein 639	protein-coding
chr1	71556825	71557260	promoter-TSS (NM_026195)	promoter-TSS (NM_026195)	-114	NM_026195	108147	Mm.38010	NM_026195	ENSMUSG00000026192	Atic	2610509C24Rik|AA536954|AW212393	5-aminoimidazole-4-carboxamide ribonucleotide formyltransferase/IMP cyclohydrolase	protein-coding
chr16	49107230	49107740	intron (NM_001166210, intron 14 of 40)	intron (NM_001166210, intron 14 of 40)	50085	NM_001166210	667772	Mm.301387	NM_001166210	ENSMUSG00000092009	Myh15	EG667772	myosin, heavy chain 15	protein-coding
chr12	106411086	106411553	Intergenic	Intergenic	36347	NR_036593	76639	Mm.375609	NR_036593	ENSMUSG00000092066	1700121N20Rik	-	RIKEN cDNA 1700121N20 gene	ncRNA
chr16	14317056	14317643	promoter-TSS (NM_025345)	promoter-TSS (NM_025345)	-17	NM_025345	66086	Mm.42072	NM_025345	ENSMUSG00000022677	Fopnl	0610037P05Rik	Fgfr1op N-terminal like	protein-coding
chr1	151754932	151755389	promoter-TSS (NM_001311165)	promoter-TSS (NM_001311165)	-142	NR_151473	102640772		NR_151473	ENSMUSG00000100594	2810414N06Rik	-	RIKEN cDNA 2810414N06 gene	ncRNA
chr17	13747674	13748011	intron (NM_022311, intron 1 of 2)	RMER10A|LTR|ERVL	-12699	NR_151731	17356	Mm.59167	NM_010806	ENSMUSG00000068036	Afdn	5033403D15Rik|AF6|Af-6|Afadin|Gm314|I-afadin|Mllt4|S-afadin	afadin, adherens junction formation factor	protein-coding
chr11	3193017	3193609	intron (NM_001363224, intron 3 of 28)	CpG	290	NM_030207	78887	Mm.394071	NM_030207	ENSMUSG00000023764	Sfi1	-	Sfi1 homolog, spindle assembly associated (yeast)	protein-coding
chr13	119596655	119597048	intron (NM_001370626, intron 2 of 2)	intron (NM_001370626, intron 2 of 2)	-26968	NM_020279	56838	Mm.143745	NM_020279	ENSMUSG00000074715	Ccl28	CCK1|MEC|Scya28	chemokine (C-C motif) ligand 28	protein-coding
chr4	5643853	5644605	5' UTR (NM_173426, exon 1 of 3)	5' UTR (NM_173426, exon 1 of 3)	139	NM_173426	242297	Mm.331470	NM_173426	ENSMUSG00000049119	Fam110b	1700012H17Rik|5031405P22|AW049855	family with sequence similarity 110, member B	protein-coding
chr15	79690266	79690742	promoter-TSS (NM_013818)	promoter-TSS (NM_013818)	-392	NM_013818	14904	Mm.19080	NM_013818	ENSMUSG00000042535	Gtpbp1	AL022987|AW045683|C85212|GP-1|Gtpbp	GTP binding protein 1	protein-coding
chr18	3934706	3935078	Intergenic	MLT1I|LTR|ERVL-MaLR	-230940	NM_026092	67328	Mm.158148	NM_026092	ENSMUSG00000024233	Lyzl1	1700038F02Rik|Lyc2|Lyzd1	lysozyme-like 1	protein-coding
chr2	156007776	156008166	promoter-TSS (NM_001356413)	promoter-TSS (NM_001356413)	6	NM_001145352	320095	Mm.442175	NM_001145351	ENSMUSG00000074646	6430550D23Rik	-	RIKEN cDNA 6430550D23 gene	protein-coding
chr16	50766147	50766474	Intergenic	Intergenic	-17099	NR_131006	78639	Mm.160109	NR_131005	ENSMUSG00000092276	1700116B05Rik	-	RIKEN cDNA 1700116B05 gene	ncRNA
chr12	105283867	105284285	Intergenic	Intergenic	-52518	NR_045047	69952	Mm.158311	NR_045047	ENSMUSG00000097929	Tunar	2810011L19Rik|Tuna	Tcl1 upstream neural differentiation associated RNA	ncRNA
chr15	102405417	102406452	promoter-TSS (NM_013672)	promoter-TSS (NM_013672)	-382	NM_013672	20683	Mm.4618	NM_013672	ENSMUSG00000001280	Sp1	1110003E12Rik|AA450830|AI845540|Sp1-1	trans-acting transcription factor 1	protein-coding
chr12	5760176	5760680	Intergenic	Intergenic	384708	NR_015579	72669	Mm.10434	NM_028318		2810032G03Rik	AI461720	RIKEN cDNA 2810032G03 gene	ncRNA
chr14	66324821	66325412	Intergenic	Intergenic	-19180	NM_001310523	56471	Mm.35474	NM_019675	ENSMUSG00000022044	Stmn4	Lagl|R75359|RB3	stathmin-like 4	protein-coding
chr11	70969915	70970423	promoter-TSS (NR_156443)	promoter-TSS (NR_156443)	-30	NM_027186	69723	Mm.275691	NM_027186	ENSMUSG00000018449	Rpain	2400006N03Rik|Rip	RPA interacting protein	protein-coding
chr3	135410852	135411373	exon (NM_025902, exon 2 of 3)	exon (NM_025902, exon 2 of 3)	12321	NM_025902	67006	Mm.269993	NM_025902	ENSMUSG00000028165	Cisd2	1500009M05Rik|1500026J14Rik|1500031D15Rik|AI848398|B630006A20Rik|Miner1|Naf-1|Noxp70|Zcd2	CDGSH iron sulfur domain 2	protein-coding
chr12	53293975	53294215	intron (NM_001370963, intron 1 of 10)	intron (NM_001370963, intron 1 of 10)	45663	NM_001370962	27386	Mm.247044	NM_013780	ENSMUSG00000021010	Npas3	4930423H22Rik|bHLHe12	neuronal PAS domain protein 3	protein-coding
chr3	87565817	87566451	Intergenic	Intergenic	16077	NM_001370856	546801		NM_001370856		Etv3l	EG546801	ets variant 3-like	protein-coding
chr13	62129369	62130258	promoter-TSS (NM_001039239)	promoter-TSS (NM_001039239)	-77	NM_001039239	630579	Mm.440905	NM_001039239	ENSMUSG00000074867	Zfp808	EG630579|Gm7036	zinc finger protein 808	protein-coding
chr13	49762165	49762791	Intergenic	Intergenic	80348	NM_172015	105148	Mm.21118	NM_172015	ENSMUSG00000037851	Iars	2510016L12Rik|AI327140|AU044614|E430001P04Rik|ILRS	isoleucine-tRNA synthetase	protein-coding
chr5	74126412	74126900	Intergenic	Intergenic	33126	NR_031758	100313943	Mm.46547	NR_031758	ENSMUSG00000093355	Snora26	MBI-6	small nucleolar RNA, H/ACA box 26	snoRNA
chr6	108828288	108828659	promoter-TSS (NM_138677)	promoter-TSS (NM_138677)	-168	NM_138677	192193	Mm.21596	NM_138677	ENSMUSG00000030104	Edem1	A130059K23Rik|EDEM|mKIAA0212	ER degradation enhancer, mannosidase alpha-like 1	protein-coding
chr3	150072653	150073350	Intergenic	Intergenic	798264	NR_040591	381482	Mm.393866	NR_040591		Gm1653	-	predicted gene 1653	ncRNA
chr18	62073688	62074221	Intergenic	ORR1F|LTR|ERVL-MaLR	106027	NM_007420	11555	Mm.5598	NM_007420	ENSMUSG00000045730	Adrb2	Adrb-2|Badm|Gpcr7	adrenergic receptor, beta 2	protein-coding
chr17	30874217	30874846	intron (NM_013811, intron 92 of 92)	intron (NM_013811, intron 92 of 92)	-27336	NM_021332	14652	Mm.390969	NM_021332	ENSMUSG00000024027	Glp1r	GLP-1R|GLP1Rc	glucagon-like peptide 1 receptor	protein-coding
chr14	18239008	18239581	promoter-TSS (NM_011584)	promoter-TSS (NM_011584)	-188	NM_011584	353187	Mm.26587	NM_011584	ENSMUSG00000021775	Nr1d2	RVR|Rev-erb	nuclear receptor subfamily 1, group D, member 2	protein-coding
chr14	105288891	105289270	intron (NM_001190989, intron 2 of 7)	(AGTAG)n|Simple_repeat|Simple_repeat	30457	NM_029561	76273	Mm.290669	NM_029561	ENSMUSG00000053253	Ndfip2	0710001O20Rik|2810436B12Rik|9130207N19Rik|N4wbp5a|mKIAA1165	Nedd4 family interacting protein 2	protein-coding
chr11	100397544	100398254	promoter-TSS (NR_132425)	promoter-TSS (NR_132425)	-109	NM_010593	16480	Mm.299774	NM_010593	ENSMUSG00000001552	Jup	Ctnng|D930025P04Rik|PG	junction plakoglobin	protein-coding
chr18	42511052	42511803	promoter-TSS (NM_001289526)	promoter-TSS (NM_001289526)	-60	NM_001360881	56070	Mm.270511	NM_001039474	ENSMUSG00000024498	Tcerg1	2410022J09Rik|2900090C16Rik|AI428505|CA150b|FBP23|FBP28|Taf2s|ca150|p144	transcription elongation regulator 1 (CA150)	protein-coding
chr8	84113362	84113576	Intergenic	Intergenic	-8672	NM_001357322	212123	Mm.260557	NM_172502	ENSMUSG00000037103	Dcaf15	6720484B16	DDB1 and CUL4 associated factor 15	protein-coding
chr11	72849636	72850152	intron (NM_001045536, intron 12 of 54)	(CAGAG)n|Simple_repeat|Simple_repeat	53668	NM_001045536	195018	Mm.272030	NM_001045536	ENSMUSG00000055670	Zzef1	8430405D05Rik|BC051585|C130099L13Rik|C85424|NSPA|mKIAA0399	zinc finger, ZZ-type with EF hand domain 1	protein-coding
chr3	88607438	88608008	Intergenic	Intergenic	-8484	NM_001198911	16800	Mm.239329	NM_008487	ENSMUSG00000028059	Arhgef2	AA408978|GEF|GEF-H1|GEFH1|LFP40|Lbcl1|Lfc|P40|mKIAA0651	rho/rac guanine nucleotide exchange factor (GEF) 2	protein-coding
chr14	8172904	8173371	promoter-TSS (NM_024221)	promoter-TSS (NM_024221)	-145	NM_024221	68263	Mm.301527	NM_024221	ENSMUSG00000021748	Pdhb	2610103L06Rik|AL024199|C81408	pyruvate dehydrogenase (lipoamide) beta	protein-coding
chr7	64392055	64392956	promoter-TSS (NM_026483)	promoter-TSS (NM_026483)	-117	NM_028626	73724	Mm.10093	NM_028626	ENSMUSG00000033429	Mcee	1110007A04Rik	methylmalonyl CoA epimerase	protein-coding
chr16	25058871	25059390	promoter-TSS (NR_040374)	promoter-TSS (NR_040374)	-509	NR_040374	319487	Mm.137341	NR_040374	ENSMUSG00000096960	A230028O05Rik	-	RIKEN cDNA A230028O05 gene	ncRNA
chr11	23451309	23451884	intron (NM_001190401, intron 58 of 79)	Tigger17|DNA|TcMar-Tigger	46443	NM_172391	268390	Mm.13148	NM_172391	ENSMUSG00000020288	Ahsa2	-	AHA1, activator of heat shock protein ATPase 2	protein-coding
chr10	108699908	108700332	promoter-TSS (NM_203660)	promoter-TSS (NM_203660)	40	NM_203660	368203	Mm.452758	NM_203660	ENSMUSG00000112039	Gm5136	C6.1AL|EG368203	predicted gene 5136	protein-coding
chr12	84450954	84451571	promoter-TSS (NM_134042)	promoter-TSS (NM_134042)	-238	NM_134042	104776	Mm.247510	NM_134042	ENSMUSG00000021238	Aldh6a1	1110038I05Rik|Mmsdh	aldehyde dehydrogenase family 6, subfamily A1	protein-coding
chr6	17749055	17749409	promoter-TSS (NM_022332)	promoter-TSS (NM_022332)	62	NM_022332	64213	Mm.12051	NM_022332	ENSMUSG00000029534	St7	9430001H04Rik|Fam4a2|HELG|RAY1|SEN4|TSG7	suppression of tumorigenicity 7	protein-coding
chr12	105705757	105706158	promoter-TSS (NM_030187)	promoter-TSS (NM_030187)	-25	NM_030187	78801	Mm.36006	NM_030187	ENSMUSG00000041323	Ak7	4930502N02Rik|AK 7	adenylate kinase 7	protein-coding
chr19	61140632	61141188	promoter-TSS (NM_001309216)	promoter-TSS (NM_001309216)	-70	NR_131955	414758	Mm.100056	NM_001001737	ENSMUSG00000074733	Zfp950	5830428H23Rik|AU016073|BC055757|Gm34518|Zfp826|mszf84	zinc finger protein 950	protein-coding
chr5	124729721	124730003	intron (NM_019536, intron 3 of 78)	intron (NM_019536, intron 3 of 78)	4777	NM_019536	56087	Mm.261014	NM_019536	ENSMUSG00000038011	Dnah10	Dnahc10	dynein, axonemal, heavy chain 10	protein-coding
chr2	32693987	32694594	promoter-TSS (NM_010236)	promoter-TSS (NM_010236)	-115	NM_010236	14287	Mm.3830	NM_010236	ENSMUSG00000009566	Fpgs	AA408187	folylpolyglutamyl synthetase	protein-coding
chr9	90263255	90263547	intron (NM_194334, intron 1 of 12)	intron (NM_194334, intron 1 of 12)	7368	NM_194334	67016	Mm.335347	NM_194334	ENSMUSG00000037410	Tbc1d2b	1810061M12Rik|AI480956|AV021536|AV023399|AW491493|mKIAA1055	TBC1 domain family, member 2B	protein-coding
chr13	50267594	50268362	Intergenic	Intergenic	6163	NR_045474	69211	Mm.259768	NR_045474		2310081J21Rik	-	RIKEN cDNA 2310081J21 gene	ncRNA
chr11	103028041	103028885	promoter-TSS (NM_008707)	promoter-TSS (NM_008707)	-80	NM_008707	18107	Mm.10265	NM_008707	ENSMUSG00000020936	Nmt1	AW536594	N-myristoyltransferase 1	protein-coding
chr2	91952192	91952568	intron (NM_138306, intron 1 of 30)	intron (NM_138306, intron 1 of 30)	-2032	NM_001166597	104418	Mm.314923	NM_138306	ENSMUSG00000040479	Dgkz	E130307B02Rik|F730209L11Rik|mDGK[z]	diacylglycerol kinase zeta	protein-coding
chr7	17055939	17056264	intron (NM_001162950, intron 2 of 14)	intron (NM_001162950, intron 2 of 14)	578	NM_016868	53417	Mm.135110	NM_016868	ENSMUSG00000004328	Hif3a	Ipas|MOP7|NEPAS|bHLHe17	hypoxia inducible factor 3, alpha subunit	protein-coding
chr7	19757409	19757770	intron (NM_020486, intron 13 of 14)	ZP3AR|Satellite|Satellite	-8016	NM_008990	19294	Mm.4341	NM_008990	ENSMUSG00000062300	Nectin2	AI325026|AI987993|Cd112|MPH|Pvr|Pvrl2|Pvs|nectin-2	nectin cell adhesion molecule 2	protein-coding
chr2	150644053	150644436	intron (NM_080575, intron 2 of 13)	intron (NM_080575, intron 2 of 13)	-23250	NR_040331	109344	Mm.440012	NR_040331	ENSMUSG00000087406	E130215H24Rik	-	RIKEN cDNA E130215H24 gene	ncRNA
chr11	4186412	4186825	promoter-TSS (NM_134023)	promoter-TSS (NM_134023)	-215	NM_134023	103724	Mm.28140	NM_134023	ENSMUSG00000034412	Tbc1d10a	AI447804|EPI64|Tbc1d10|mFLJ00288	TBC1 domain family, member 10a	protein-coding
chr18	31633891	31635186	promoter-TSS (NM_001357555)	promoter-TSS (NM_001357555)	170	NM_001357554	269003	Mm.194538	NM_172965	ENSMUSG00000024260	Sap130	2610304F09Rik|6720406D06	Sin3A associated protein	protein-coding
chr2	127559298	127559668	Intergenic	Intergenic	-18066	NM_138750	192212	Mm.34171	NM_138750	ENSMUSG00000027376	Prom2	AI507243|Prom-rp	prominin 2	protein-coding
chr2	32132636	32133068	Intergenic	G-rich|Low_complexity|Low_complexity	-18296	NM_172661	227723	Mm.25504	NM_172661	ENSMUSG00000039262	Prrc2b	5830434P21Rik|AI173903|Bat2l|Bat2l1|D430039P21|mKIAA0515	proline-rich coiled-coil 2B	protein-coding
chr2	69802925	69803337	Intergenic	RMER1B|Other|Other	13394	NM_028521	73373	Mm.9621	NM_028521	ENSMUSG00000027088	Phospho2	1700048E23Rik|AI661517|AU021728|AV006103|Phos2	phosphatase, orphan 2	protein-coding
chr14	5071875	5072117	Intergenic	Intergenic	21367	NM_175393	108978	Mm.396152	NM_175393	ENSMUSG00000096197	4930555G01Rik	-	RIKEN cDNA 4930555G01 gene	protein-coding
chr14	6888686	6889065	Intergenic	Intergenic	-131818	NM_001309401	100041151	Mm.396155	NM_001309401	ENSMUSG00000091754	Gm3636	100042043	predicted gene 3636	protein-coding
chr16	36828059	36828845	promoter-TSS (NM_001113401)	promoter-TSS (NM_001113401)	52	NM_177128	320299	Mm.222934	NM_177128	ENSMUSG00000022837	Iqcb1	6820449I09Rik|AV128382|NPHP5	IQ calmodulin-binding motif containing 1	protein-coding
chr5	24577237	24577697	promoter-TSS (NM_001190443)	promoter-TSS (NM_001190443)	0	NM_001190443	27407	Mm.21629	NM_013853	ENSMUSG00000028953	Abcf2	0710005O05Rik|Drr3|E430001O06	ATP-binding cassette, sub-family F (GCN20), member 2	protein-coding
chr1	55171820	55172521	intron (NM_001356287, intron 7 of 7)	intron (NM_001356287, intron 7 of 7)	40925	NM_001310585	19070	Mm.291037	NM_025283	ENSMUSG00000025979	Mob4	2610109B12Rik|Mobkl3|Phocn|Prei3	MOB family member 4, phocein	protein-coding
chr2	178178055	178178498	intron (NM_001177791, intron 1 of 12)	Lx8|LINE|L1	2927	NM_001177791	74189	Mm.44413	NM_028806	ENSMUSG00000027525	Phactr3	1500003N10Rik|4930415A02Rik|H17739|Scapin1|Scapinin|mKIAA4224	phosphatase and actin regulator 3	protein-coding
chr9	27192080	27192393	Intergenic	Intergenic	-36815	NM_023277	83964	Mm.28770	NM_023277	ENSMUSG00000031990	Jam3	1110002N23Rik|JAM-3|JAM-C|Jcam3	junction adhesion molecule 3	protein-coding
chr1	136588748	136589141	Intergenic	Intergenic	-35957	NM_177643	226442	Mm.62521	NM_177643	ENSMUSG00000041483	Zfp281	Znf281	zinc finger protein 281	protein-coding
chr2	48316090	48316748	Intergenic	RLTR34C_MM|LTR|ERVK	-497690	NM_007396	11480	Mm.314338	NM_007396	ENSMUSG00000052155	Acvr2a	ActrIIa|Acvr2|TactrII	activin receptor IIA	protein-coding
chr6	145111692	145112084	Intergenic	Intergenic	-3748	NM_001281981	16970	Mm.843	NM_008511	ENSMUSG00000030263	Lrmp	D6Int3|D6Int4|D6Int5|D6Int7|D6Int8|Jaw1	lymphoid-restricted membrane protein	protein-coding
chr3	79567994	79568379	promoter-TSS (NM_001162999)	promoter-TSS (NM_001162999)	-6	NR_152118	75879	Mm.410800	NR_152118		4930589L23Rik	-	RIKEN cDNA 4930589L23 gene	ncRNA
chr12	57971285	57971775	Intergenic	RMER1A|Other|Other	-240274	NM_009216	20605	Mm.278336	NM_009216	ENSMUSG00000035431	Sstr1	SRIF-2|SS-1-R|SS1-R|SS1R|Smstr-1|Smstr1|sst1	somatostatin receptor 1	protein-coding
chr3	90475893	90476380	promoter-TSS (NM_026374)	promoter-TSS (NM_026374)	-65	NM_026374	67781	Mm.227258	NM_026374	ENSMUSG00000001016	Ilf2	6230405A16Rik|TEG-267|Tex261|Tex267	interleukin enhancer binding factor 2	protein-coding
chr13	50933743	50934479	Intergenic	Intergenic	166616	NR_029463	77428	Mm.405630	NR_029463		9430083A17Rik	-	RIKEN cDNA 9430083A17 gene	ncRNA
chr6	86669117	86669790	promoter-TSS (NM_010751)	promoter-TSS (NM_010751)	-294	NM_010751	17119	Mm.279580	NM_010751	ENSMUSG00000001156	Mxd1	AW122478|Mad|Mad1	MAX dimerization protein 1	protein-coding
chr8	44993558	44994379	intron (NM_001081286, intron 2 of 25)	intron (NM_001081286, intron 2 of 25)	43760	NM_001081286	14107	Mm.27365	NM_001081286	ENSMUSG00000070047	Fat1	2310038E12Rik|AU023433|Fath|mFat1	FAT atypical cadherin 1	protein-coding
chr9	66834427	66835075	promoter-TSS (NM_026674)	promoter-TSS (NM_026674)	-45	NM_026674	68318	Mm.284229	NM_026674	ENSMUSG00000053040	Aph1c	0610008A10Rik|APH-1b|Aph1b	aph1 homolog C, gamma secretase subunit	protein-coding
chr3	109544168	109544648	intron (NM_020505, intron 15 of 26)	MTEb|LTR|ERVL-MaLR	-29599	NM_146139	57257	Mm.282257	NM_020505	ENSMUSG00000033721	Vav3	A530094I06Rik|AA986410|Idd18.1	vav 3 oncogene	protein-coding
chr12	40037313	40037948	promoter-TSS (NM_007487)	promoter-TSS (NM_007487)	-254	NM_007487	11861	Mm.12723	NM_007487	ENSMUSG00000047446	Arl4a	AI467555|Arl4	ADP-ribosylation factor-like 4A	protein-coding
chr13	65562593	65562957	Intergenic	CpG	-214181	NM_001371118
chr16	94828273	94828573	intron (NM_001025590, intron 2 of 2)	intron (NM_001025590, intron 2 of 2)	28267	NM_001025590	16522	Mm.328720	NM_010606	ENSMUSG00000043301	Kcnj6	BIR1|GIRK2|KATP2|KCNJ7|Kir3.2|weaver|wv	potassium inwardly-rectifying channel, subfamily J, member 6	protein-coding
chr7	18910383	18910882	promoter-TSS (NM_001033314)	promoter-TSS (NM_001033314)	-228	NM_001033314	232933	Mm.333624	NM_001033314	ENSMUSG00000074358	Ccdc61	C530028I08Rik|Gm159	coiled-coil domain containing 61	protein-coding
chr9	20866924	20867206	Intergenic	L1MA5|LINE|L1	-1577	NM_175687	319278	Mm.249932	NM_175687	ENSMUSG00000038884	Shfl	A230050P20Rik|RyDEN	shiftless antiviral inhibitor of ribosomal frameshifting	protein-coding
chr13	110006213	110006736	Intergenic	Intergenic	102665	NR_035442	100316683		NR_035442	ENSMUSG00000084651	Mir1904	Mirn1904|mmu-mir-1904	microRNA 1904	ncRNA
chr2	16838569	16839093	Intergenic	RLTR41A2|LTR|ERV1	174895	NR_040632	75069	Mm.50378	NR_040632		4930515L03Rik	-	RIKEN cDNA 4930515L03 gene	ncRNA
chr9	116776488	116776891	intron (NM_001172123, intron 6 of 14)	MTE2b|LTR|ERVL-MaLR	475794	NM_001172126	207181	Mm.326411	NM_178660	ENSMUSG00000039607	Rbms3	6720477E09Rik|8430436O14Rik	RNA binding motif, single stranded interacting protein	protein-coding
chr6	146855209	146855583	intron (NM_027059, intron 2 of 9)	intron (NM_027059, intron 2 of 9)	5286	NM_027059	69371	Mm.252733	NM_027059	ENSMUSG00000030292	Smco2	1700023A16Rik	single-pass membrane protein with coiled-coil domains 2	protein-coding
chr11	70668503	70669275	TTS (NM_001190379)	TTS (NM_001190379)	527	NM_172561	216873	Mm.432524	NM_172561	ENSMUSG00000018287	Spag7	5730443G10|ACRP|FSA-1|Fsa1l	sperm associated antigen 7	protein-coding
chr2	144011207	144011752	promoter-TSS (NM_133626)	promoter-TSS (NM_133626)	-216	NM_024281	81910	Mm.13705	NM_024281	ENSMUSG00000027422	Rrbp1	1700087N07Rik|5730465C04Rik|ES/130|mKIAA1398|mRRp0|mRRp1.8|mRRp10|mRRp15a|mRRp15b|mRRp16.8|mRRp2|mRRp41|mRRp47|mRRp5.4|p180	ribosome binding protein 1	protein-coding
chr5	104240489	104240976	Intergenic	Intergenic	38115	NM_016779	13406	Mm.199008	NM_016779	ENSMUSG00000029307	Dmp1	AG1|AV020965|DMP-1|Dmp|PP	dentin matrix protein 1	protein-coding
chr2	83713379	83713652	Intergenic	Intergenic	-10882	NM_008402	16410	Mm.227	NM_008402	ENSMUSG00000027087	Itgav	1110004F14Rik|2610028E01Rik|CD51|D430040G12Rik	integrin alpha V	protein-coding
chr4	143187934	143188295	intron (NM_001081355, intron 2 of 9)	intron (NM_001081355, intron 2 of 9)	24595	NM_001081355	110593	Mm.332020	NM_001081355	ENSMUSG00000057637	Prdm2	4833427P12Rik|E330024L24Rik|Gm1033|Gm19732|KMT8|Riz|Riz1|Znfpr1c1	PR domain containing 2, with ZNF domain	protein-coding
chr5	109923284	109923898	Intergenic	Intergenic	-9972	NR_040366	100642166		NR_040366	ENSMUSG00000090015	Gm15446	-	predicted gene 15446	ncRNA
chr11	50131102	50131611	promoter-TSS (NM_001290760)	promoter-TSS (NM_001290760)	-4	NM_001290759	76795	Mm.290975	NM_029745	ENSMUSG00000036644	Tbc1d9b	-	TBC1 domain family, member 9B	protein-coding
chr17	50209844	50210246	Intergenic	MLT1K|LTR|ERVL-MaLR	-19548	NM_181397	76438	Mm.41854	NM_181397	ENSMUSG00000039316	Rftn1	2310015N21Rik|AI853526	raftlin lipid raft linker 1	protein-coding
chr9	3012729	3012931	Intergenic	GSAT_MM|Satellite|Satellite	25913	NR_039546	100628572		NR_039546	ENSMUSG00000106183	Mir101c	mir-101c|mmu-mir-101c	microRNA 101c	ncRNA
chr7	63115734	63116029	intron (NM_007390, intron 4 of 9)	intron (NM_007390, intron 4 of 9)	96645	NM_007390	11441	Mm.113464	NM_007390	ENSMUSG00000030525	Chrna7	Acra7|alpha7|nAchR	cholinergic receptor, nicotinic, alpha polypeptide 7	protein-coding
chr18	76035048	76035592	intron (NM_145356, intron 3 of 4)	intron (NM_145356, intron 3 of 4)	-24006	NM_001357506	207259	Mm.159332	NM_145356	ENSMUSG00000044646	Zbtb7c	B230208J24Rik|Kr-pok|Zbtb36	zinc finger and BTB domain containing 7C	protein-coding
chr4	8666751	8667107	Intergenic	Intergenic	-23477	NM_001277149	320790	Mm.138792	NM_001033395	ENSMUSG00000041235	Chd7	A730019I05Rik|Cycn|Cyn|Dz|Edy|Flo|GENA 47|GENA 60|Gena 52|Lda|Mt|Obt|Todo|WBE1|Whi|metis	chromodomain helicase DNA binding protein 7	protein-coding
chr6	67694423	67695000	Intergenic	RMER1A|Other|Other	-129012	NR_003100	75070	Mm.463364	NR_003100		4930515G16Rik	-	myc induced nuclear antigen pseudogene	pseudo
chr7	80860776	80861286	Intergenic	Intergenic	-1077	NM_009553	22691	Mm.358645	NM_009553	ENSMUSG00000038797	Zscan2	Zfp-29|Zfp29	zinc finger and SCAN domain containing 2	protein-coding
chr4	147443237	147444095	intron (NM_001371349, intron 1 of 3)	intron (NM_001371349, intron 1 of 3)	552	NM_001371349
chr9	32136779	32137052	intron (NM_001370957, intron 2 of 21)	MLTR11B|LTR|ERVK	20927	NM_001195632	330914	Mm.46683	NM_177379	ENSMUSG00000041444	Arhgap32	3426406O18Rik|Gc-gap|Grit|Px-rics|Rics|mKIAA0712|p200Rhogap|p250Gap	Rho GTPase activating protein 32	protein-coding
chr13	48497677	48498303	intron (NM_026450, intron 4 of 4)	intron (NM_026450, intron 4 of 4)	15420	NM_001164575	67911	Mm.251375	NM_026450	ENSMUSG00000050954	Zfp169	1700025J14Rik|4930429A13Rik|BE688704	zinc finger protein 169	protein-coding
chr5	140830291	140830790	promoter-TSS (NM_010302)	promoter-TSS (NM_010302)	-109	NM_010302	14673	Mm.370185	NM_010302	ENSMUSG00000000149	Gna12	AI414047|AI504261|Galpha12	guanine nucleotide binding protein, alpha 12	protein-coding
chr1	157560692	157561295	intron (NM_033354, intron 21 of 27)	intron (NM_033354, intron 21 of 27)	34823	NM_001159986	89867	Mm.87114	NM_033354	ENSMUSG00000026589	Sec16b	Lztr2|Rgpr|Rgpr-p117	SEC16 homolog B (S. cerevisiae)	protein-coding
chr11	108943750	108944090	intron (NM_015732, intron 8 of 10)	intron (NM_015732, intron 8 of 10)	23571	NM_015732	12006	Mm.71710	NM_015732	ENSMUSG00000000142	Axin2	Axi1|Axil|Conductin	axin 2	protein-coding
chr2	119300134	119300536	Intergenic	Intergenic	11593	NM_172269	228545	Mm.294761	NM_172269	ENSMUSG00000034216	Vps18	9930024E13Rik	VPS18 CORVET/HOPS core subunit	protein-coding
chr11	101740090	101740537	intron (NM_144831, intron 7 of 22)	intron (NM_144831, intron 7 of 22)	7357	NM_144831	217207	Mm.28186	NM_144831	ENSMUSG00000034931	Dhx8	Ddx8|mDEAH6|mKIAA4096	DEAH (Asp-Glu-Ala-His) box polypeptide 8	protein-coding
chr4	120864331	120864782	intron (NM_182929, intron 1 of 7)	intron (NM_182929, intron 1 of 7)	9757	NM_182929	242662	Mm.192502	NM_182929	ENSMUSG00000032890	Rims3	A730060M23Rik|Nim3|Rim3|mKIAA0237	regulating synaptic membrane exocytosis 3	protein-coding
chr3	97628518	97628990	promoter-TSS (NM_010232)	promoter-TSS (NM_010232)	-50	NM_001161763	14263	Mm.385180	NM_010232	ENSMUSG00000028088	Fmo5	5033418D19Rik|AI195026	flavin containing monooxygenase 5	protein-coding
chr9	63928471	63928898	Intergenic	Intergenic	93375	NM_008542	17130	Mm.325757	NM_008542	ENSMUSG00000036867	Smad6	Madh6|b2b390Clo	SMAD family member 6	protein-coding
chr13	8885540	8886206	exon (NM_145360, exon 1 of 5)	exon (NM_145360, exon 1 of 5)	267	NM_145360	319554	Mm.29847	NM_145360	ENSMUSG00000058258	Idi1	4832416K17Rik|IPPI1	isopentenyl-diphosphate delta isomerase	protein-coding
chr7	40121575	40122229	Intergenic	MTE2a|LTR|ERVL-MaLR	-552835	NR_045504	71029	Mm.399496	NR_045504	ENSMUSG00000102004	4933402C06Rik	-	RIKEN cDNA 4933402C06 gene	ncRNA
chr12	18386986	18387722	Intergenic	CpG	-127156	NM_001201330	236366	Mm.352227	NM_001033157	ENSMUSG00000073197	5730507C01Rik	-	RIKEN cDNA 5730507C01 gene	protein-coding
chrY	3344018	3344453	intron (NM_001270514, intron 1 of 8).4	intron (NM_001270514, intron 1 of 8).4	1094	NM_001270514	100862383	Mm.4711	NM_001270514	ENSMUSG00000094511	Gm21693	-	predicted gene, 21693	protein-coding
chr10	22058093	22059023	Intergenic	CpG	9521	NM_053264	114671	Mm.288194	NM_053264	ENSMUSG00000069712	4930444G20Rik	-	RIKEN cDNA 4930444G20 gene	protein-coding
chr9	66795346	66796122	promoter-TSS (NM_177583)	promoter-TSS (NM_177583)	-311	NM_177583	208117	Mm.41291	NM_177583	ENSMUSG00000032375	Aph1b	2310057K14Rik|Aph1c	aph1 homolog B, gamma secretase subunit	protein-coding
chr8	127301786	127302260	intron (NM_001013580, intron 1 of 13)	Charlie1a|DNA|hAT-Charlie	2411	NM_001013580	93742	Mm.299254	NM_033620	ENSMUSG00000025812	Pard3	AA960621|AI256638|Asip|D8Ertd580e|Par-3|Par3|Pard-3|Pard3a|Phip	par-3 family cell polarity regulator	protein-coding
chr14	84671736	84672422	Intergenic	Intergenic	-195655	NR_015539	319903	Mm.440481	NR_015539	ENSMUSG00000115529	9630013A20Rik	lncOL1	RIKEN cDNA 9630013A20 gene	ncRNA
chr8	11071291	11071514	Intergenic	Intergenic	-62473	NM_001081212	384783	Mm.407207	NM_001081212	ENSMUSG00000038894	Irs2	Irs-2	insulin receptor substrate 2	protein-coding
chr6	87811780	87812453	promoter-TSS (NR_104477)	promoter-TSS (NR_104477)	-18	NR_104477	69834	Mm.37380	NM_133717	ENSMUSG00000030055	Rab43	1810048P08Rik|2500004H21Rik|AW490415	RAB43, member RAS oncogene family	protein-coding
chr10	21144933	21145388	exon (NM_001198914, exon 10 of 16)	exon (NM_001198914, exon 10 of 16)	15824	NM_010848	17863	Mm.52109	NM_010848	ENSMUSG00000019982	Myb	AI550390|M16449|c-myb	myeloblastosis oncogene	protein-coding
chr8	57511474	57511901	promoter-TSS (NM_008252)	promoter-TSS (NM_008252)	-156	NM_001363443	97165	Mm.276881	NM_008252	ENSMUSG00000054717	Hmgb2	C80539|HMG-2|Hmg2	high mobility group box 2	protein-coding
chr6	144738130	144738447	Intergenic	Lx8|LINE|L1	65420	NR_040519	66760	Mm.233631	NR_040519	ENSMUSG00000085785	Sox5os3	4933425H06Rik	SRY (sex determining region Y)-box 5, opposite strand 3	ncRNA
chr5	141088139	141088614	Intergenic	ZP3AR|Satellite|Satellite	-87780	NM_175362	108723	Mm.46187	NM_175362	ENSMUSG00000036526	Card11	0610008L17Rik|2410011D02Rik|BIMP3|CARMA1	caspase recruitment domain family, member 11	protein-coding
chr2	171994782	171995197	Intergenic	Intergenic	-32190	NR_040509	75655	Mm.396203	NR_040509	ENSMUSG00000086823	1700028P15Rik	-	RIKEN cDNA 1700028P15 gene	ncRNA
chr7	42642231	42642860	promoter-TSS (NM_001242388)	promoter-TSS (NM_001242388)	59	NM_001242388	208111	Mm.387841	NM_001034857	ENSMUSG00000074158	Zfp976	9830147E19Rik|C330019L16Rik	zinc finger protein 976	protein-coding
chr5	137628461	137629117	promoter-TSS (NM_001168652)	promoter-TSS (NM_001168652)	-334	NR_033148	100316903	Mm.200763	NR_033148		Gm20605	Lrch4-sap25	predicted gene 20605	ncRNA
chr17	32143207	32143519	exon (NM_008716, exon 24 of 33)	exon (NM_008716, exon 24 of 33)	23527	NM_008716	18131	Mm.439741	NM_008716	ENSMUSG00000038146	Notch3	AW229011|N3|hpbk	notch 3	protein-coding
chr9	22475116	22475780	promoter-TSS (NM_181316)	promoter-TSS (NM_181316)	-267	NM_001360258	319845	Mm.176725	NM_178415	ENSMUSG00000035919	Bbs9	E130103I17Rik	Bardet-Biedl syndrome 9 (human)	protein-coding
chr6	42245766	42246339	exon (NM_029555, exon 1 of 8)	exon (NM_029555, exon 1 of 8)	117	NM_029555	76263	Mm.267014	NM_029555	ENSMUSG00000029864	Gstk1	0610025I19Rik|AW260476|DsbA-L	glutathione S-transferase kappa 1	protein-coding
chr14	87299158	87299453	Intergenic	ORR1A1|LTR|ERVL-MaLR	-117278	NM_001253755	219249	Mm.35168	NM_172605	ENSMUSG00000022019	Tdrd3	4732418C03Rik|6720468N18	tudor domain containing 3	protein-coding
chr13	64153320	64153965	promoter-TSS (NM_175494)	promoter-TSS (NM_175494)	-443	NM_175494	238673	Mm.300065	NM_175494	ENSMUSG00000044934	Zfp367	8030486J21Rik|ZFF29a|ZFF29b|Znf367	zinc finger protein 367	protein-coding
chr16	5166223	5166629	intron (NM_001127725, intron 3 of 15)	(TG)n|Simple_repeat|Simple_repeat	19317	NM_001127725	665119	Mm.102072	NM_001127725	ENSMUSG00000091712	Sec14l5	-	SEC14-like lipid binding 5	protein-coding
chr7	140036474	140036940	promoter-TSS (NM_133755)	promoter-TSS (NM_133755)	-33	NM_001286007	74237	Mm.40888	NM_133755	ENSMUSG00000025474	Tubgcp2	1700022B05Rik	tubulin, gamma complex associated protein 2	protein-coding
chr7	19715471	19716010	promoter-TSS (NM_016871)	promoter-TSS (NM_016871)	-311	NM_016871	53333	Mm.61682	NM_016871	ENSMUSG00000002984	Tomm40	AW539759|Mom35|Tom40	translocase of outer mitochondrial membrane 40	protein-coding
chr19	23373299	23373586	intron (NM_174857, intron 5 of 13)	intron (NM_174857, intron 5 of 13)	74880	NM_174857	71738	Mm.50841	NM_174857	ENSMUSG00000033207	Mamdc2	1200015L10Rik|AI591564|mamcan	MAM domain containing 2	protein-coding
chr17	72836235	72836848	promoter-TSS (NM_001357368)	promoter-TSS (NM_001357368)	-87	NM_027166	383295	Mm.277533	NM_027166	ENSMUSG00000039770	Ypel5	2310076K21Rik|CGI-127	yippee like 5	protein-coding
chr4	43058599	43059064	promoter-TSS (NM_001310758)	promoter-TSS (NM_001310758)	-122	NM_001310758	22249	Mm.128892	NM_021468	ENSMUSG00000028456	Unc13b	Munc13-1|Munc13-2|Unc13a|Unc13h1|Unc13h2	unc-13 homolog B	protein-coding
chr6	47748035	47748448	Intergenic	(GGAGAA)n|Simple_repeat|Simple_repeat	-4010	NR_002841	19799		NR_002841		Rn4.5s	-	4.5S RNA	rRNA
chr4	117906966	117907536	intron (NM_146152, intron 2 of 19)	intron (NM_146152, intron 2 of 19)	7748	NM_146152	230673	Mm.287810	NM_146152	ENSMUSG00000033365	Ipo13	Imp13|Kap13|Ranbp13	importin 13	protein-coding
chr12	113424294	113425353	Intergenic	(CAGCT)n|Simple_repeat|Simple_repeat	-64742	NM_001009545	238405	Mm.442216	NM_001009545	ENSMUSG00000051804	Adam6b	4930523C11Rik	a disintegrin and metallopeptidase domain 6B	protein-coding
chr3	35753865	35754208	promoter-TSS (NM_029570)	promoter-TSS (NM_029570)	-27	NM_029570	76295	Mm.239416	NM_029570	ENSMUSG00000037400	Atp11b	1110019I14Rik|ATPIF|ATPIR|mKIAA0956	ATPase, class VI, type 11B	protein-coding
chr16	17405457	17406187	promoter-TSS (NM_023348)	promoter-TSS (NM_023348)	-178	NM_023348	67474	Mm.271992	NM_023348	ENSMUSG00000022765	Snap29	1300018G05Rik|AI891940|AU020222|BB131856|Gs32	synaptosomal-associated protein 29	protein-coding
chr10	25458604	25459237	intron (NM_001358753, intron 3 of 18)	CpG	50552	NM_013511	13822	Mm.306026	NM_013511	ENSMUSG00000019978	Epb41l2	4.1G|AW555191|D10Ertd398e|Epb4.1l2|NBL2	erythrocyte membrane protein band 4.1 like 2	protein-coding
chr8	116670589	116671028	intron (NM_029441, intron 1 of 6)	intron (NM_029441, intron 1 of 6)	62183	NM_029441	75796	Mm.159575	NM_029441	ENSMUSG00000031758	Cdyl2	1700029M19Rik|4930453I21Rik|Gm20194	chromodomain protein, Y chromosome-like 2	protein-coding
chr15	98937888	98938110	Intergenic	(CA)n|Simple_repeat|Simple_repeat	-3609	NM_011654	22143	Mm.392113	NM_011654	ENSMUSG00000023004	Tuba1b	Tuba2	tubulin, alpha 1B	protein-coding
chr3	38082409	38082697	Intergenic	RLTR44D|LTR|ERVK	125566	NR_040541	71342	Mm.410782	NR_040541	ENSMUSG00000106002	5430434I15Rik	-	RIKEN cDNA 5430434I15 gene	ncRNA
chr6	47953188	47953587	promoter-TSS (NM_178898)	promoter-TSS (NM_178898)	-3	NM_178898	101197	Mm.241063	NM_178898	ENSMUSG00000045466	Zfp956	AI894139	zinc finger protein 956	protein-coding
chr3	142700758	142701182	promoter-TSS (NM_001293560)	promoter-TSS (NM_001293560)	-78	NM_001293560	229905	Mm.289643	NM_173763	ENSMUSG00000040213	Kyat3	Ccbl2|KATIII|Kat3	kynurenine aminotransferase 3	protein-coding
chr13	73160094	73160635	Intergenic	Intergenic	68736	NR_126459	75361	Mm.385732	NR_126459		4930555K05Rik	-	RIKEN cDNA 4930555K05 gene	ncRNA
chrX	141276529	141276719	intron (NM_053185, intron 3 of 44)	(CCCTAA)n|Simple_repeat|Simple_repeat	197452	NM_053185	94216	Mm.155586	NM_053185	ENSMUSG00000031273	Col4a6	BB116301	collagen, type IV, alpha 6	protein-coding
chr2	14041405	14041762	intron (NM_013935, intron 4 of 6)	ORR1B1|LTR|ERVL-MaLR	14452	NM_001012396	30963	Mm.241205	NM_013935	ENSMUSG00000063275	Hacd1	Ptpla	3-hydroxyacyl-CoA dehydratase 1	protein-coding
chr18	61194651	61195418	Intergenic	Intergenic	16562	NM_007885	13521	Mm.24803	NM_007885	ENSMUSG00000034320	Slc26a2	Dtd|ST-OB	solute carrier family 26 (sulfate transporter), member 2	protein-coding
chr10	121853359	121853869	intron (NM_001081037, intron 8 of 21)	intron (NM_001081037, intron 8 of 21)	113684	NM_001359720	270802	Mm.209172	NM_173022	ENSMUSG00000053684	BC048403	E030027L10	cDNA sequence BC048403	protein-coding
chrY	2901873	2902289	intron (NM_001270515, intron 1 of 8).3	intron (NM_001270515, intron 1 of 8).3	1092	NM_001270513	100862365	Mm.4711	NM_001270513	ENSMUSG00000093918	Gm21677	Rbm|Rbmy1a1	predicted gene, 21677	protein-coding
chrY	67962971	67963265	Intergenic	(CA)n|Simple_repeat|Simple_repeat	-574837	NM_001160142	100041256	Mm.462976	NM_001160142	ENSMUSG00000096898	Gm20867	-	predicted gene, 20867	protein-coding
chr10	70384765	70385049	Intergenic	ORR1B2|LTR|ERVL-MaLR	-55761	NM_001359551	71721	Mm.477813	NM_024244	ENSMUSG00000043259	Fam13c	1200015N20Rik|C030038O19Rik|mKIAA1796	family with sequence similarity 13, member C	protein-coding
chr1	136466052	136466559	Intergenic	CpG	-1543	NM_001287179	381293	Mm.458468	NM_001081258	ENSMUSG00000041498	Kif14	D1Ertd367e|E130203M01	kinesin family member 14	protein-coding
chr13	34993685	34994443	promoter-TSS (NR_073427)	promoter-TSS (NR_073427)	80	NM_001110331	23986	Mm.491141	NM_011868	ENSMUSG00000021417	Eci2	Acbd2|Drs1|Hca88|Peci	enoyl-Coenzyme A delta isomerase 2	protein-coding
chr9	123285049	123285328	Intergenic	Intergenic	-24399	NM_001002267	72309	Mm.8569	NM_001002267	ENSMUSG00000054871	Tmem158	2310037P21Rik|Ris1	transmembrane protein 158	protein-coding
chr5	102166140	102166412	Intergenic	ORR1B1|LTR|ERVL-MaLR	-96355	NM_172882	72145	Mm.332522	NM_172882	ENSMUSG00000043940	Wdfy3	2610509D04Rik|ALFY|AW319683|B930017C24|BWF1|Bchs|D5Ertd66e|Ggtb3|ZFYVE25|mKIAA0993	WD repeat and FYVE domain containing 3	protein-coding
chr6	47654819	47655026	TTS (NR_002841).9	TTS (NR_002841).9	172	NR_002841	19799		NR_002841		Rn4.5s	-	4.5S RNA	rRNA
chr7	83631737	83632195	promoter-TSS (NM_023377)	promoter-TSS (NM_023377)	-51	NM_023377	170460	Mm.357953	NM_023377	ENSMUSG00000046027	Stard5	2310058G22Rik|AI607880|D7Ertd152e	StAR-related lipid transfer (START) domain containing 5	protein-coding
chr2	170903361	170903732	Intergenic	Intergenic	171739	NM_029761	76829	Mm.41633	NM_029761	ENSMUSG00000027560	Dok5	2700055C10Rik	docking protein 5	protein-coding
chr9	102962247	102962903	Intergenic	Intergenic	-45912	NM_033314	24059	Mm.207106	NM_033314	ENSMUSG00000032548	Slco2a1	2310021C19Rik|Pgt|Slc21a2	solute carrier organic anion transporter family, member 2a1	protein-coding
chr13	76549911	76550139	intron (NM_030174, intron 1 of 20)	RLTR41A2|LTR|ERV1	165064	NM_030174	78771	Mm.316249	NM_030174	ENSMUSG00000021596	Mctp1	2810465F10Rik	multiple C2 domains, transmembrane 1	protein-coding
chr3	149752963	149753565	Intergenic	MTEa|LTR|ERVL-MaLR	478527	NR_040591	381482	Mm.393866	NR_040591		Gm1653	-	predicted gene 1653	ncRNA
chr2	76287745	76287977	intron (NM_001081033, intron 2 of 19)	ORR1A4|LTR|ERVL-MaLR	50932	NM_001081033	241489	Mm.246613	NM_001081033	ENSMUSG00000075270	Pde11a	6330414F14Rik|A630086N24Rik|Gm350|PDE11A1	phosphodiesterase 11A	protein-coding
chr2	175869027	175869457	promoter-TSS (NM_001177480).2	promoter-TSS (NM_001177480).2	-3	NM_001164689	626832	Mm.441314	NM_001164689	ENSMUSG00000078887	Gm6710	1600017I02Rik|2310011F05Rik|2900089K14Rik|3100002L24Rik|WF-4	predicted gene 6710	protein-coding
chr6	56233577	56233807	intron (NM_001159956, intron 1 of 16)	(TTAGGG)n|Simple_repeat|Simple_repeat	128700	NM_001025568	18575	Mm.5145	NM_011054	ENSMUSG00000004347	Pde1c	-	phosphodiesterase 1C	protein-coding
chr19	50671061	50671528	intron (NM_001360457, intron 1 of 26)	intron (NM_001360457, intron 1 of 26)	7352	NM_001360457	58178	Mm.313672	NM_021377	ENSMUSG00000043531	Sorcs1	Sorcs|mSorCS	sortilin-related VPS10 domain containing receptor 1	protein-coding
chr5	100518087	100518522	promoter-TSS (NM_012001)	promoter-TSS (NM_012001)	-5	NM_012001	26891	Mm.957	NM_012001	ENSMUSG00000035297	Cops4	AW208976|D5Ertd774e|SGN4	COP9 signalosome subunit 4	protein-coding
chr3	153884297	153884485	intron (NM_031870, intron 7 of 19)	(CACAG)n|Simple_repeat|Simple_repeat	20500	NM_001282054	55993	Mm.272226	NM_031870	ENSMUSG00000005493	Msh4	4930485C04Rik|AV144863|mMsh4	mutS homolog 4	protein-coding
chr13	113052561	113052763	intron (NM_001281487, intron 2 of 11)	intron (NM_001281487, intron 2 of 11)	-6274	NM_027127	69590	Mm.12715	NM_027127	ENSMUSG00000021760	Gpx8	2310016C16Rik|AU017063	glutathione peroxidase 8 (putative)	protein-coding
chr8	116978576	116979103	promoter-TSS (NM_001357254)	promoter-TSS (NM_001357254)	120	NM_001357253	69528	Mm.272846	NM_027103	ENSMUSG00000031847	1700030J22Rik	-	RIKEN cDNA 1700030J22 gene	protein-coding
chr18	12236178	12236662	promoter-TSS (NM_008720)	promoter-TSS (NM_008720)	-34	NM_008720	18145	Mm.3484	NM_008720	ENSMUSG00000024413	Npc1	A430089E03Rik|C85354|D18Ertd139e|D18Ertd723e|lcsd|nmf164|spm	NPC intracellular cholesterol transporter 1	protein-coding
chr7	141122842	141123791	Intergenic	Intergenic	-5510	NM_178381	71345	Mm.235813	NM_178381	ENSMUSG00000054662	Ano9	5430425C04Rik|Tmem16j|Tp53i5|Trp53i5	anoctamin 9	protein-coding
chr17	51215236	51215501	Intergenic	Lx2B|LINE|L1	-36016	NM_001285991	72238	Mm.120650	NM_028162	ENSMUSG00000023923	Tbc1d5	1600014N05Rik	TBC1 domain family, member 5	protein-coding
chr7	29003835	29004326	TTS (NM_008279)	TTS (NM_008279)	21226	NM_008279	26411	Mm.148278	NM_008279	ENSMUSG00000037337	Map4k1	Hpk1|mHPK1	mitogen-activated protein kinase kinase kinase kinase 1	protein-coding
chr12	4768898	4769552	promoter-TSS (NM_028376)	promoter-TSS (NM_028376)	42	NM_175431	207921	Mm.184898	NM_175431	ENSMUSG00000050545	Fam228b	A830093I24Rik	family with sequence similarity 228, member B	protein-coding
chr12	72085447	72085873	promoter-TSS (NM_024205)	promoter-TSS (NM_024205)	-179	NM_001205067	104771	Mm.258935	NM_024205	ENSMUSG00000005078	Jkamp	1200003C05Rik|2310047L11Rik|Jamp	JNK1/MAPK8-associated membrane protein	protein-coding
chr5	130096847	130097177	intron (NM_001130476, intron 1 of 5)	intron (NM_001130476, intron 1 of 5)	17642	NM_001130476	22021	Mm.332720	NM_013837	ENSMUSG00000034118	Tpst1	R75054|Tango13a	protein-tyrosine sulfotransferase 1	protein-coding
chr5	80500813	80501061	Intergenic	(CCCTAA)n|Simple_repeat|Simple_repeat	-519634	NM_001347367	319387	Mm.273631	NM_198702	ENSMUSG00000037605	Adgrl3	5430402I23Rik|CIRL-3|D130075K09Rik|Gm1379|LEC3|Lphn3|mKIAA0768	adhesion G protein-coupled receptor L3	protein-coding
chr6	53806771	53807118	Intergenic	MLT1C|LTR|ERVL-MaLR	13881	NM_025817	66873	Mm.422727	NM_025817	ENSMUSG00000043496	Tril	1200009O22Rik|AI316813|mKIAA0644	TLR4 interactor with leucine-rich repeats	protein-coding
chr15	21391438	21391675	intron (NM_001008420, intron 3 of 11)	RLTR44A|LTR|ERVK	280104	NM_001008420	215654	Mm.300909	NM_001008420	ENSMUSG00000040452	Cdh12	Cdhb	cadherin 12	protein-coding
chr12	48190559	48190990	Intergenic	RMER13B|LTR|ERVK	-1192109	NM_001160112	15228	Mm.4704	NM_008241	ENSMUSG00000020950	Foxg1	2900064B05Rik|BF-1|Bf1|Hfh9|Hfhbf1	forkhead box G1	protein-coding
chr1	5588354	5588891	5' UTR (NM_001318735, exon 1 of 4)	5' UTR (NM_001318735, exon 1 of 4)	129	NM_001318735	18387	Mm.7977	NM_011011	ENSMUSG00000025905	Oprk1	K-OR-1|KOR|KOR-1|MSL-1|Oprk2|R21	opioid receptor, kappa 1	protein-coding
chr11	29692606	29693005	promoter-TSS (NM_194054)	promoter-TSS (NM_194054)	-93	NM_194053	68585	Mm.192580	NM_024226	ENSMUSG00000020458	Rtn4	1110020G17Rik|AA407876|AA409940|AA960376|ASY|C130026I10Rik|NOGO|NSP-CL|NgA|Nogo-A|Nogo-B|Nogo-C|mKIAA0886|mKIAA4153	reticulon 4	protein-coding
chr16	86820770	86821172	Intergenic	Intergenic	-14458	NR_153789	102635020	Mm.132956	NR_153789		Gm32461	-	predicted gene, 32461	ncRNA
chr5	136143323	136143991	Intergenic	Intergenic	4876	NM_028070	72041	Mm.294725	NM_028070	ENSMUSG00000039754	Alkbh4	2010004B12Rik|Abj4	alkB homolog 4, lysine demethylase	protein-coding
chr2	161341466	161341852	Intergenic	Intergenic	-232573	NR_126509	71389	Mm.122738	NM_173368	ENSMUSG00000057133	Chd6	5430439G14Rik|6330406J24Rik|CHD-6	chromodomain helicase DNA binding protein 6	protein-coding
chr7	88378590	88378946	Intergenic	(CAGAG)n|Simple_repeat|Simple_repeat	-51505	NM_028238	72433	Mm.276669	NM_028238	ENSMUSG00000030559	Rab38	2310011F14Rik|AU043391|cht	RAB38, member RAS oncogene family	protein-coding
chr6	5356600	5357015	Intergenic	Intergenic	-26579	NM_023048	65255	Mm.51340	NM_023048	ENSMUSG00000042607	Asb4	8430401O13Rik|AV117194|AW060255	ankyrin repeat and SOCS box-containing 4	protein-coding
chr13	41366888	41367190	intron (NM_001111324, intron 2 of 7)	(CACAG)n|Simple_repeat|Simple_repeat	-8038	NM_017464	18003	Mm.288980	NM_017464	ENSMUSG00000021365	Nedd9	Cas-L|CasL|HEF1|MEF1|Nedd-9|p105	neural precursor cell expressed, developmentally down-regulated gene 9	protein-coding
chr7	24076825	24077057	Intergenic	ZP3AR|Satellite|Satellite	-4956	NM_172483	210135	Mm.32254	NM_172483	ENSMUSG00000057101	Zfp180	2310040I01Rik|AI852378|D130011P11|HHZ168	zinc finger protein 180	protein-coding
chr10	128695832	128696826	promoter-TSS (NM_177411)	promoter-TSS (NM_177411)	-61	NM_177411	19344	Mm.12815	NM_011229	ENSMUSG00000000711	Rab5b	C030027M18Rik	RAB5B, member RAS oncogene family	protein-coding
chr10	53629639	53630278	promoter-TSS (NM_027830)	promoter-TSS (NM_027830)	-1	NM_027830	71567	Mm.278221	NM_027830	ENSMUSG00000058298	Mcm9	9030408O17Rik|Gm235|Mcmdc1	minichromosome maintenance 9 homologous recombination repair factor	protein-coding
chr10	66649137	66649803	Intergenic	(CA)n|Simple_repeat|Simple_repeat	270914	NR_138560	68488	Mm.338835	NR_138560		1110002J07Rik	-	RIKEN cDNA 1110002J07 gene	ncRNA
chr15	80233685	80233969	promoter-TSS (NM_178719)	promoter-TSS (NM_178719)	-253	NM_001357660	239555	Mm.307163	NM_178719	ENSMUSG00000022412	Mief1	A230016E22|AI452372|Smcr7l	mitochondrial elongation factor 1	protein-coding
chr7	107594645	107595171	promoter-TSS (NM_008905)	promoter-TSS (NM_008905)	-143	NM_008905	19024	Mm.2817	NM_008905	ENSMUSG00000036528	Ppfibp2	Cclp1	PTPRF interacting protein, binding protein 2 (liprin beta 2)	protein-coding
chr12	80380181	80380859	intron (NM_001364324, intron 5 of 8)	(CACAG)n|Simple_repeat|Simple_repeat	11157	NR_037207	100526530		NR_037207	ENSMUSG00000105972	Mir1843a	Mir1843|mir-1843a|mmu-mir-1843|mmu-mir-1843a	microRNA 1843a	ncRNA
chr2	165861519	165862332	intron (NM_001363018, intron 2 of 23)	intron (NM_001363018, intron 2 of 23)	-3752	NM_001252585	228880	Mm.227598	NM_027230	ENSMUSG00000039671	Zmynd8	1110013E22Rik|2010005I16Rik|3632413B07Rik|AI316811|AL024039|Prkcbp1|RACK7	zinc finger, MYND-type containing 8	protein-coding
chr13	25050376	25050601	Intergenic	(TG)n|Simple_repeat|Simple_repeat	-5516	NM_001195617	195208	Mm.284719	NM_177577	ENSMUSG00000035910	Dcdc2a	AW492955|Dcdc2|RU2	doublecortin domain containing 2a	protein-coding
chr6	147105307	147105787	intron (NM_001081237, intron 2 of 2)	intron (NM_001081237, intron 2 of 2)	14472	NM_001081237	232539	Mm.491206	NM_001081237	ENSMUSG00000040102	Klhl42	A330079N23Rik|AI450355|C230080I20Rik|Ctb9|Klhdc5|mKIAA1340	kelch-like 42	protein-coding
chr7	4739661	4740606	promoter-TSS (NM_001115018)	promoter-TSS (NM_001115018)	6	NM_001358044	232811	Mm.247844	NM_146177	ENSMUSG00000059851	Kmt5c	BC024816|Suv4-20h2|Suv420h2	lysine methyltransferase 5C	protein-coding
chr4	138325423	138325868	intron (NM_026880, intron 1 of 7)	intron (NM_026880, intron 1 of 7)	651	NM_026880	68943	Mm.18539	NM_026880	ENSMUSG00000028756	Pink1	1190006F07Rik|AU042772|AW557854|BRPK|mFLJ00387	PTEN induced putative kinase 1	protein-coding
chr2	26932977	26933860	promoter-TSS (NM_011512)	promoter-TSS (NM_011512)	93	NM_011512	20932	Mm.300594	NM_011512	ENSMUSG00000014867	Surf4	AL033340|AL033373|Surf-4	surfeit gene 4	protein-coding
chr2	22589155	22589350	Intergenic	Intergenic	-33075	NM_008078	14417	Mm.4784	NM_008078	ENSMUSG00000026787	Gad2	6330404F12Rik|GAD(65)|GAD65|Gad-2	glutamic acid decarboxylase 2	protein-coding
chr14	4265147	4265624	Intergenic	Lx8|LINE|L1	-69378	NM_001309398	554327	Mm.460196	NM_001309398	ENSMUSG00000079388	2610042L04Rik	Tksn|takusan	RIKEN cDNA 2610042L04 gene	protein-coding
chr17	55931697	55932339	Intergenic	Intergenic	13241	NM_146249	240120	Mm.441018	NM_146249	ENSMUSG00000062101	Zfp119b	-	zinc finger protein 119b	protein-coding
chr8	70839560	70839989	promoter-TSS (NM_027560)	promoter-TSS (NM_027560)	-54	NM_027560	70807	Mm.24215	NM_027560	ENSMUSG00000002910	Arrdc2	4632416I05Rik|Ilad1	arrestin domain containing 2	protein-coding
chr5	139149451	139150066	promoter-TSS (NM_001081265)	promoter-TSS (NM_001081265)	243	NM_001359098	19085	Mm.306163	NM_008923	ENSMUSG00000025855	Prkar1b	AI385716|RIbeta	protein kinase, cAMP dependent regulatory, type I beta	protein-coding
chr15	57912000	57912610	5' UTR (NM_001081396, exon 1 of 21)	5' UTR (NM_001081396, exon 1 of 21)	106	NM_001081396	210544	Mm.390835	NM_199300	ENSMUSG00000022364	Tbc1d31	4B3|D330013L20Rik|Gm85|Wdr67	TBC1 domain family, member 31	protein-coding
chr1	153532428	153532650	intron (NM_028749, intron 4 of 11)	intron (NM_028749, intron 4 of 11)	17175	NM_028749	74091	Mm.24887	NM_028749	ENSMUSG00000042684	Npl	0610033B02Rik	N-acetylneuraminate pyruvate lyase	protein-coding
chr19	14598050	14598644	promoter-TSS (NM_011600)	promoter-TSS (NM_011600)	-164	NM_001302947	21888	Mm.103638	NM_011600	ENSMUSG00000024642	Tle4	5730411M05Rik|AA792082|Bce-1|Bce1|ESTM13|ESTM14|Grg4|X83332|X83333|grg-4	transducin-like enhancer of split 4	protein-coding
chr5	136255095	136255606	intron (NM_001291239, intron 17 of 22)	ZP3AR|Satellite|Satellite	-10410	NM_018825	23921	Mm.425294	NM_018825	ENSMUSG00000005057	Sh2b2	Aps	SH2B adaptor protein 2	protein-coding
chr14	19311429	19312036	Intergenic	Intergenic	290855	NM_001024706	432825	Mm.327147	NM_001024706	ENSMUSG00000095024	Gm5458	EG432825	predicted gene 5458	protein-coding
chr14	3652870	3653376	intron (NR_033121, intron 1 of 6).2	intron (NR_033121, intron 1 of 6).2	1093	NR_033121	100041530	Mm.444311	NR_033121	ENSMUSG00000096488	Gm10409	EG666890|Gm8348	predicted pseudogene 8348	pseudo
chr5	134844033	134844522	Intergenic	ZP3AR|Satellite|Satellite	62456	NM_029681	76629	Mm.159750	NM_029681	ENSMUSG00000040576	Tmem270	1700111I05Rik|Wbscr28	transmembrane protein 270	protein-coding
chr4	116518109	116518490	intron (NM_008389, intron 3 of 8)	intron (NM_008389, intron 3 of 8)	10750	NM_008389	16351	Mm.1350	NM_008389	ENSMUSG00000028696	Ipp	D4Jhu8|Mipp	IAP promoted placental gene	protein-coding
chr8	123196995	123197365	intron (NM_007876, intron 2 of 10)	ORR1A1|LTR|ERVL-MaLR	10945	NM_007876	13479	Mm.20388	NM_007876	ENSMUSG00000019278	Dpep1	AI327012|MBD	dipeptidase 1	protein-coding
chr9	29483844	29485155	intron (NM_001357597, intron 1 of 8)	(GGCTG)n|Simple_repeat|Simple_repeat	-71047	NM_001357603	235106	Mm.283138	NM_172290	ENSMUSG00000059974	Ntm	6230410L23Rik|B230210G24Rik|Hnt|Igdcc2|R75390	neurotrimin	protein-coding
chr2	30363942	30364309	promoter-TSS (NM_175392)	promoter-TSS (NM_175392)	-108	NM_001242407	108958	Mm.254974	NM_175392	ENSMUSG00000026858	Miga2	5730472N09Rik|AA408683|AI790341|C9orf54|Fam73b|R74766	mitoguardin 2	protein-coding
chr16	65571906	65573000	Intergenic	RMER1A|Other|Other	-9691	NM_026879	68942	Mm.432944	NM_026879	ENSMUSG00000004843	Chmp2b	1190006E07Rik	charged multivesicular body protein 2B	protein-coding
chr9	111152791	111153052	intron (NM_027742, intron 3 of 13)	L1MB8|LINE|L1	34810	NM_027742	71268	Mm.302287	NM_027742	ENSMUSG00000032497	Lrrfip2	5133400F20Rik|AI850587	leucine rich repeat (in FLII) interacting protein 2	protein-coding
chr3	142395553	142395930	promoter-TSS (NM_001190855)	promoter-TSS (NM_001190855)	-45	NM_001190852	56376	Mm.117709	NM_019808	ENSMUSG00000028273	Pdlim5	1110001A05Rik|AI987914|C87059|Enh|Enh1|Enh2|Enh3|LIM	PDZ and LIM domain 5	protein-coding
chr14	3386027	3386503	Intergenic	Intergenic	-8828	NM_029288	100041774	Mm.360540	NM_029288	ENSMUSG00000095533	Gm10413	100038846|1700001E04Rik|Gm1973	predicted gene 10413	protein-coding
chr1	158844662	158845119	intron (NM_001085376, intron 9 of 22)	intron (NM_001085376, intron 9 of 22)	113285	NM_001085376	23850	Mm.458621	NM_001085376	ENSMUSG00000073530	Pappa2	PAPP-A2|PLAC3|Pappe	pappalysin 2	protein-coding
chr13	65639681	65639954	Intergenic	Intergenic	-291223	NM_001371118
chr6	3290875	3291143	intron (NR_036696, intron 1 of 2)	intron (NR_036696, intron 1 of 2)	2490	NR_036696	667335	Mm.380219	NR_036696	ENSMUSG00000106779	Gm8579	EG667335	spermatogenesis associated glutamate (E)-rich protein 4a pseudogene	pseudo
chr6	37441645	37442578	promoter-TSS (NM_178661)	promoter-TSS (NM_178661)	37	NM_178661	208647	Mm.169929	NM_178661	ENSMUSG00000038648	Creb3l2	BBF2H7|C530025K05Rik|SCIRR69	cAMP responsive element binding protein 3-like 2	protein-coding
chr6	47764148	47764533	Intergenic	RMER12B|LTR|ERVK	-11415	NR_002841	19799		NR_002841		Rn4.5s	-	4.5S RNA	rRNA
chr13	21395954	21396675	TTS (NR_105907)	TTS (NR_105907)	324	NR_105907	102465568		NR_105907	ENSMUSG00000098790	Mir6942	Gm27287|mmu-mir-6942	microRNA 6942	ncRNA
chr12	64917627	64917924	promoter-TSS (NM_001025605)	promoter-TSS (NM_001025605)	-136	NM_001025605	217648	Mm.341586	NM_001025605	ENSMUSG00000047227	Gm527	-	predicted gene 527	protein-coding
chr4	56842816	56843067	intron (NM_018761, intron 3 of 18)	(CAGA)n|Simple_repeat|Simple_repeat	22270	NM_018761	54366	Mm.218891	NM_018761	ENSMUSG00000038816	Ctnnal1	ACRP|AI616177|AW545119|C86009|Catnal1	catenin (cadherin associated protein), alpha-like 1	protein-coding
chr8	60901770	60902174	intron (NM_001357270, intron 4 of 6)	intron (NM_001357270, intron 4 of 6)	11579	NM_028299	72612	Mm.25263	NM_028299	ENSMUSG00000038005	Hpf1	2700029M09Rik|C230006B22Rik|C4orf27	histone PARylation factor 1	protein-coding
chr1	161876646	161877087	promoter-TSS (NM_001357401)	promoter-TSS (NM_001357401)	-184	NR_151683	226551	Mm.170002	NM_172645	ENSMUSG00000040297	Suco	4732491B11|AI848100|AU016931|Opt	SUN domain containing ossification factor	protein-coding
chr10	86778267	86779123	promoter-TSS (NM_175331)	promoter-TSS (NM_175331)	-310	NM_175331	103466	Mm.200446	NM_175331	ENSMUSG00000054027	Nt5dc3	AU040402|AW540062|C630002B14Rik|TU12B1-TY	5'-nucleotidase domain containing 3	protein-coding
chr6	66534959	66535561	promoter-TSS (NM_019499)	promoter-TSS (NM_019499)	39	NM_019499	56150	Mm.489653	NM_019499	ENSMUSG00000029910	Mad2l1	AA673185|MAD2	MAD2 mitotic arrest deficient-like 1	protein-coding
chr13	41358572	41359158	5' UTR (NM_017464, exon 1 of 7)	5' UTR (NM_017464, exon 1 of 7)	136	NM_017464	18003	Mm.288980	NM_017464	ENSMUSG00000021365	Nedd9	Cas-L|CasL|HEF1|MEF1|Nedd-9|p105	neural precursor cell expressed, developmentally down-regulated gene 9	protein-coding
chr9	27213119	27213361	Intergenic	(CCCTAA)n|Simple_repeat|Simple_repeat	-57819	NM_023277	83964	Mm.28770	NM_023277	ENSMUSG00000031990	Jam3	1110002N23Rik|JAM-3|JAM-C|Jcam3	junction adhesion molecule 3	protein-coding
chr4	120287808	120288190	promoter-TSS (NM_194060)	promoter-TSS (NM_194060)	-738	NM_194060	329934	Mm.277090	NM_194060	ENSMUSG00000052135	Foxo6	-	forkhead box O6	protein-coding
chr14	68084989	68085288	intron (NM_010910, intron 1 of 3)	intron (NM_010910, intron 1 of 3)	1275	NM_010910	18039	Mm.1956	NM_010910	ENSMUSG00000022055	Nefl	AI847934|CMT2E|NF-L|NF68|Nfl	neurofilament, light polypeptide	protein-coding
chr5	134409945	134410908	intron (NM_001081470, intron 4 of 26)	intron (NM_001081470, intron 4 of 26)	45836	NM_001081465	57080	Mm.332735	NM_020331	ENSMUSG00000023079	Gtf2ird1	1700012P16Rik|BEN|Cream1|ESTM9|GTF3|Gtf2il|MusTRD1|Tg(Alb1-Myc)166.8Sst|WBSCR11|X83320	general transcription factor II I repeat domain-containing 1	protein-coding
chr1	182124433	182125168	promoter-TSS (NM_012058)	promoter-TSS (NM_012058)	63	NM_012058	27058	Mm.273196	NM_012058	ENSMUSG00000026511	Srp9	9kDa	signal recognition particle 9	protein-coding
chr6	145656825	145657378	Intergenic	Intergenic	41138	NM_009449	22147	Mm.270295	NM_009449	ENSMUSG00000067338	Tuba3b	M[a]7|Tuba7	tubulin, alpha 3B	protein-coding
chr9	30137855	30138301	Intergenic	Intergenic	-174809	NM_001357593	235106	Mm.283138	NM_172290	ENSMUSG00000059974	Ntm	6230410L23Rik|B230210G24Rik|Hnt|Igdcc2|R75390	neurotrimin	protein-coding
chr18	66376627	66377191	Intergenic	Intergenic	-81695	NM_021451	58801	Mm.271878	NM_021451	ENSMUSG00000024521	Pmaip1	Noxa	phorbol-12-myristate-13-acetate-induced protein 1	protein-coding
chr10	126028102	126028352	Intergenic	Intergenic	62008	NM_177152	320398	Mm.275586	NM_177152	ENSMUSG00000020105	Lrig3	9030421L11Rik|9130004I02Rik|9430095K15Rik|mKIAA3016	leucine-rich repeats and immunoglobulin-like domains 3	protein-coding
chr9	3032100	3032675	Intergenic	GSAT_MM|Satellite|Satellite	6356	NR_039546	100628572		NR_039546	ENSMUSG00000106183	Mir101c	mir-101c|mmu-mir-101c	microRNA 101c	ncRNA
chr14	5358320	5358672	Intergenic	Lx8|LINE|L1	30578	NM_001256886	100041678	Mm.443041	NM_001256886	ENSMUSG00000096003	Gm3500	100041758|Gm3401	predicted gene 3500	protein-coding
chr11	43681657	43682004	promoter-TSS (NM_001164231)	promoter-TSS (NM_001164231)	-168	NM_027557	70802	Mm.397449	NM_027557	ENSMUSG00000044950	Pwwp2a	4631424J17Rik|AI891583|AU024105|D930040F23Rik	PWWP domain containing 2A	protein-coding
chr14	49525131	49525541	intron (NM_029238, intron 1 of 7)	intron (NM_029238, intron 1 of 7)	501	NM_029238	75288	Mm.78738	NM_029238	ENSMUSG00000021852	Slc35f4	4930550L21Rik	solute carrier family 35, member F4	protein-coding
chr19	3436877	3437282	Intergenic	Intergenic	-22535	NM_010253	14419	Mm.4655	NM_010253	ENSMUSG00000024907	Gal	Galn	galanin and GMAP prepropeptide	protein-coding
chr2	37358516	37359154	intron (NM_026176, intron 1 of 3)	intron (NM_026176, intron 1 of 3)	497	NM_026176	67466	Mm.30709	NM_026176	ENSMUSG00000009030	Pdcl	1200011E13Rik|AW108059|PhLP1	phosducin-like	protein-coding
chr13	66113372	66113689	promoter-TSS (NM_001177832)	promoter-TSS (NM_001177832)	77	NM_001177832	628709	Mm.390595	NM_001177832	ENSMUSG00000095909	Gm10324	-	predicted gene 10324	protein-coding
chr18	26492727	26492988	Intergenic	RLTR44E|LTR|ERVK	-738700	NM_001362285	108013	Mm.266435	NM_133195	ENSMUSG00000024268	Celf4	A230070D14Rik|BRUNOL-4|Brul4|Brunol4|C130060B05Rik	CUGBP, Elav-like family member 4	protein-coding
chr10	34019529	34019906	promoter-TSS (NM_025614)	promoter-TSS (NM_025614)	-101	NM_025614	66521	Mm.28528	NM_025614	ENSMUSG00000019782	Rwdd1	0710001K08Rik|2610002D06Rik|2700069A07Rik|IH1	RWD domain containing 1	protein-coding
chr10	68028529	68029329	intron (NM_001359318, intron 9 of 11)	intron (NM_001359318, intron 9 of 11)	49359	NM_001359318	170799	Mm.209844	NM_133244	ENSMUSG00000037846	Rtkn2	B130039D23Rik|Mbf|Plekhk1	rhotekin 2	protein-coding
chr10	66661392	66661887	Intergenic	Intergenic	258745	NR_138560	68488	Mm.338835	NR_138560		1110002J07Rik	-	RIKEN cDNA 1110002J07 gene	ncRNA
chr1	155416811	155417678	5' UTR (NM_011273, exon 1 of 15)	5' UTR (NM_011273, exon 1 of 15)	200	NM_011273	19775	Mm.266215	NM_011273	ENSMUSG00000026469	Xpr1	Rmc-1|Rmc1|Sxv|Syg1|XR	xenotropic and polytropic retrovirus receptor 1	protein-coding
chr15	12204764	12205118	promoter-TSS (NM_001356498)	promoter-TSS (NM_001356498)	-87	NM_001356498	268783	Mm.54460	NM_172958	ENSMUSG00000039458	Mtmr12	3Pap|4932703C11|C730015A02Rik|Pip3ap|mKIAA1682	myotubularin related protein 12	protein-coding
chr1	93667723	93668137	Intergenic	Intergenic	-17645	NM_016778	51800	Mm.3295	NM_016778	ENSMUSG00000026278	Bok	matador|mtd	BCL2-related ovarian killer	protein-coding
chr3	30855642	30856190	promoter-TSS (NM_001286996)	promoter-TSS (NM_001286996)	-34	NM_001286996	71862	Mm.272019	NM_027965	ENSMUSG00000037661	Gpr160	1700025D19Rik|GPCR150	G protein-coupled receptor 160	protein-coding
chr6	136906395	136906853	TTS (NM_026983)	TTS (NM_026983)	15556	NM_026983	69187	Mm.33692	NM_026983	ENSMUSG00000030219	Erp27	1810033M07Rik|1810047B09Rik	endoplasmic reticulum protein 27	protein-coding
chr10	58231811	58232870	exon (NM_001081954, exon 1 of 1)	exon (NM_001081954, exon 1 of 1)	335	NM_001081954	664783	Mm.482575	NM_001081954		Dux	AW822073|Dux4|Duxbl|EG664783	double homeobox	protein-coding
chr6	50608980	50609386	Intergenic	Intergenic	-12593	NM_027564	70821	Mm.157323	NM_027564	ENSMUSG00000029828	4921507P07Rik	TISP74	RIKEN cDNA 4921507P07 gene	protein-coding
chr6	29030739	29030936	Intergenic	(TG)n|Simple_repeat|Simple_repeat	8218	NR_029567	387237		NR_029567	ENSMUSG00000065469	Mir129-1	Mirn129-1|Mirn129b|miR-129b|mir-129-1	microRNA 129-1	ncRNA
chr6	47663480	47663716	TTS (NR_002841).4	TTS (NR_002841).4	157	NR_002841	19799		NR_002841		Rn4.5s	-	4.5S RNA	rRNA
chr17	5934858	5935220	Intergenic	CpG	-6241	NR_151772	20975	Mm.236068	NM_011523	ENSMUSG00000023805	Synj2	AI481647|SJ2|mKIAA0348	synaptojanin 2	protein-coding
chr2	65363916	65364336	promoter-TSS (NM_177074)	promoter-TSS (NM_177074)	-100	NM_177074	320106	Mm.227703	NM_177074	ENSMUSG00000061171	Slc38a11	9330158F14Rik	solute carrier family 38, member 11	protein-coding
chr3	20057294	20058064	promoter-TSS (NM_001355097)	promoter-TSS (NM_001355097)	-132	NM_001355097	20585	Mm.209650	NM_009210	ENSMUSG00000002428	Hltf	AF010600|BC057116|P113|Smarca3|Snf2l3	helicase-like transcription factor	protein-coding
chr16	21908675	21909099	intron (NM_172821, intron 7 of 12)	intron (NM_172821, intron 7 of 12)	16918	NM_172821	71751	Mm.420837	NM_172821	ENSMUSG00000033618	Map3k13	C130026N12Rik|LZK	mitogen-activated protein kinase kinase kinase 13	protein-coding
chr9	22156601	22156948	promoter-TSS (NM_001082532)	promoter-TSS (NM_001082532)	-72	NM_001082532	66268	Mm.28924	NM_025457	ENSMUSG00000010607	Pigyl	1810008A14Rik|PIG-Y|Pigy	phosphatidylinositol glycan anchor biosynthesis, class Y-like	protein-coding
chr12	102389972	102390398	3' UTR (NM_001161365, exon 10 of 10)	3' UTR (NM_001161365, exon 10 of 10)	49628	NM_011175	19141	Mm.17185	NM_011175	ENSMUSG00000021190	Lgmn	AEP|AI746452|AU022324|Prsc1	legumain	protein-coding
chr9	20681627	20682218	intron (NM_001357639, intron 1 of 5)	intron (NM_001357639, intron 1 of 5)	29804	NM_001364495	23988	Mm.7906	NM_023371	ENSMUSG00000032171	Pin1	0610025L01Rik|D9Bwg1161e	protein (peptidyl-prolyl cis/trans isomerase) NIMA-interacting 1	protein-coding
chr16	94760735	94761048	TTS (NM_010606)	TTS (NM_010606)	95799	NM_001025590	16522	Mm.328720	NM_010606	ENSMUSG00000043301	Kcnj6	BIR1|GIRK2|KATP2|KCNJ7|Kir3.2|weaver|wv	potassium inwardly-rectifying channel, subfamily J, member 6	protein-coding
chr16	10542986	10543306	promoter-TSS (NM_021428)	promoter-TSS (NM_021428)	-92	NM_021428	58239	Mm.353006	NM_021428	ENSMUSG00000038055	Dexi	1810029J14Rik|AI836170|AW413143|D16Bwg0586e|Myle	dexamethasone-induced transcript	protein-coding
chr4	34729772	34730371	5' UTR (NM_027041, exon 1 of 11)	5' UTR (NM_027041, exon 1 of 11)	135	NM_001347062	69329	Mm.389548	NM_027041	ENSMUSG00000028294	Cfap206	1700003M02Rik|AU024269	cilia and flagella associated protein 206	protein-coding
chr1	43827749	43828068	promoter-TSS (NR_160750)	promoter-TSS (NR_160750)	-69	NR_160750	67883	Mm.387202	NM_026430	ENSMUSG00000057363	Uxs1	1600025I13Rik|AI451869|AI649125|AW550562	UDP-glucuronate decarboxylase 1	protein-coding
chr10	4334347	4334715	intron (NM_031185, intron 2 of 3)	intron (NM_031185, intron 2 of 3)	52944	NM_001359811	381990	Mm.262466	NM_001033466	ENSMUSG00000075327	Zbtb2	Gm1103	zinc finger and BTB domain containing 2	protein-coding
chr8	116313643	116313954	Intergenic	Lx8|LINE|L1	-191217	NM_029297	75465	Mm.23114	NM_029297	ENSMUSG00000034467	Dynlrb2	1700009A04Rik|DNLC2B|Dncl2b	dynein light chain roadblock-type 2	protein-coding
chr5	123906999	123907245	promoter-TSS (NM_026603)	promoter-TSS (NM_026603)	-153	NM_026603	68184	Mm.28549	NM_026603	ENSMUSG00000023106	Denr	1500003K04Rik	density-regulated protein	protein-coding
chr2	140395023	140395613	promoter-TSS (NM_028387)	promoter-TSS (NM_028387)	-112	NM_001013802	72899	Mm.229466	NM_028387	ENSMUSG00000068205	Macrod2	1110033L15Rik|2610107G07Rik|2900006F19Rik	MACRO domain containing 2	protein-coding
chr9	94860883	94861729	intron (NM_177909, intron 6 of 15)	intron (NM_177909, intron 6 of 15)	109477	NR_106116	102465763		NR_106116	ENSMUSG00000098251	Mir7656	Gm27614|mmu-mir-7656	microRNA 7656	ncRNA
chr18	84418656	84419268	intron (NM_001033341, intron 4 of 8)	intron (NM_001033341, intron 4 of 8)	170542	NM_001033341	240476	Mm.329575	NM_001033341	ENSMUSG00000048410	Zfp407	6430585N13Rik|Gm333|Gm334|Gm948|ZNF407	zinc finger protein 407	protein-coding
chr17	28942122	28942381	promoter-TSS (NM_153390)	promoter-TSS (NM_153390)	11	NM_153390	69307	Mm.107605	NM_153390	ENSMUSG00000045378	Pxt1	1700001G18Rik|Stepp	peroxisomal, testis specific 1	protein-coding
chr3	9038393	9038639	Intergenic	Intergenic	-23448	NR_040597	75149	Mm.399324	NR_040597	ENSMUSG00000103116	4930539M17Rik	-	RIKEN cDNA 4930539M17 gene	ncRNA
chr13	35833913	35834668	intron (NM_001123386, intron 2 of 6)	L1M4|LINE|L1	72057	NM_145938	208366	Mm.35545	NM_145938	ENSMUSG00000021418	Rpp40	D8Bwg1265e|Rnasep1	ribonuclease P 40 subunit	protein-coding
chr6	83831444	83832090	promoter-TSS (NM_146169)	promoter-TSS (NM_146169)	-26	NM_146169	232164	Mm.404420	NM_146169	ENSMUSG00000045896	Paip2b	-	poly(A) binding protein interacting protein 2B	protein-coding
chr8	84846700	84847260	promoter-TSS (NM_007591)	promoter-TSS (NM_007591)	-49	NM_007591	12317	Mm.1971	NM_007591	ENSMUSG00000003814	Calr	CRT|Calregulin	calreticulin	protein-coding
chr3	52390834	52391236	Intergenic	ORR1C2|LTR|ERVL-MaLR	122698	NM_019739	56458	Mm.29891	NM_019739	ENSMUSG00000044167	Foxo1	AI876417|Afxh|FKHR|Fkhr1|Foxo1a	forkhead box O1	protein-coding
chr14	41424498	41425067	Intergenic	Intergenic	-148429	NM_001358037	100041722	Mm.425891	NM_001358037	ENSMUSG00000090440	1700049E17Rik2	-	tandem duplication of RIKEN cDNA 1700049E17 gene, gene 2	protein-coding
chr9	78587888	78588289	promoter-TSS (NM_001276452)	promoter-TSS (NM_001276452)	-43	NM_172773	235504	Mm.46932	NM_172773	ENSMUSG00000049624	Slc17a5	4631416G20Rik|4732491M05|AST|ISSD|NSD|SD|SIALIN|SIASD|SLD	solute carrier family 17 (anion/sugar transporter), member 5	protein-coding
chr11	115514291	115514692	promoter-TSS (NM_008258)	promoter-TSS (NM_008258)	-98	NM_008258	15374	Mm.1775	NM_008258	ENSMUSG00000020737	Jpt1	Hn1	Jupiter microtubule associated homolog 1	protein-coding
chr2	174410168	174410469	Intergenic	(CAGCC)n|Simple_repeat|Simple_repeat	-5486	NM_020580	57314	Mm.271709	NM_020580	ENSMUSG00000016253	Nelfcd	2410003I03Rik|C77797|Th1|Th1l	negative elongation factor complex member C/D, Th1l	protein-coding
chr2	150217795	150218365	promoter-TSS (NM_001142411)	promoter-TSS (NM_001142411)	-19	NM_001142411	245174	Mm.378428	NM_001142411	ENSMUSG00000060336	Zfp937	EG245174|Gm4979|ZIPO-I	zinc finger protein 937	protein-coding
chr9	14001656	14001941	Intergenic	RLTR41|LTR|ERV1	174082	NM_176836	72826	Mm.246174	NM_176836	ENSMUSG00000037808	Fam76b	2810485I05Rik|C78303	family with sequence similarity 76, member B	protein-coding
chr4	106870651	106870943	Intergenic	Intergenic	-40673	NM_198438	72475	Mm.195635	NM_023672	ENSMUSG00000061887	Ssbp3	2610021L12Rik|2610200M23Rik|5730488C10Rik|AI854733|AW551939|LAST|SSDP1	single-stranded DNA binding protein 3	protein-coding
chr3	84155286	84156016	intron (NM_029797, intron 1 of 7)	CpG	135	NM_029797	76915	Mm.274829	NM_029797	ENSMUSG00000033752	Mnd1	2610034E18Rik|AI591601|Gaj	meiotic nuclear divisions 1	protein-coding
chr12	117778764	117779035	Intergenic	ORR1B2|LTR|ERVL-MaLR	-64962	NM_146040	217946	Mm.281149	NM_146040	ENSMUSG00000021175	Cdca7l	BC006933|JPO2	cell division cycle associated 7 like	protein-coding
chr13	45507255	45507545	promoter-TSS (NM_025508)	promoter-TSS (NM_025508)	-44	NM_025508	66355	Mm.290802	NM_025508	ENSMUSG00000000253	Gmpr	2310004P21Rik|AV028449|GMPR 1	guanosine monophosphate reductase	protein-coding
chr15	39437281	39437957	exon (NM_001256383, exon 4 of 26)	exon (NM_001256383, exon 4 of 26)	-221892	NM_001256384	116838	Mm.309296	NM_053271	ENSMUSG00000037386	Rims2	2810036I15Rik|AW048769|RIM2|Rab3ip2|Rim2(+40A)|Rim2(+44A)|Rim2(+4A)|Serg2|Syt3-rs|mKIAA0751	regulating synaptic membrane exocytosis 2	protein-coding
chr8	116993239	116993817	promoter-TSS (NM_026572)	promoter-TSS (NM_026572)	-30	NR_157137	68133	Mm.258462	NM_026572	ENSMUSG00000034424	Gcsh	1100001L02Rik|5730591C18Rik	glycine cleavage system protein H (aminomethyl carrier)	protein-coding
chr14	69190273	69191041	promoter-TSS (NM_010921)	promoter-TSS (NM_010921)	-35	NM_010921	18095	Mm.3520	NM_010921	ENSMUSG00000022061	Nkx3-1	Bax|NKX3.1|NKX3A|Nkx-3.1|bagpipe	NK3 homeobox 1	protein-coding
chr14	54893656	54894226	promoter-TSS (NM_019402)	promoter-TSS (NM_019402)	-202	NM_019402	54196	Mm.7723	NM_019402	ENSMUSG00000022194	Pabpn1	PAB2|Pabp3|mPABII	poly(A) binding protein, nuclear 1	protein-coding
chr1	144003922	144004374	promoter-TSS (NM_009061)	promoter-TSS (NM_009061)	1	NM_009061	19735	Mm.28262	NM_009061	ENSMUSG00000026360	Rgs2	GOS8	regulator of G-protein signaling 2	protein-coding
chr2	132262877	132263134	promoter-TSS (NM_138651)	promoter-TSS (NM_138651)	-143	NM_001291040	110911	Mm.284503	NM_138651	ENSMUSG00000058793	Cds2	5730450N06Rik|5730460C18Rik|AI854580|D2Wsu127e	CDP-diacylglycerol synthase (phosphatidate cytidylyltransferase) 2	protein-coding
chr8	70792579	70793104	promoter-TSS (NM_199308)	promoter-TSS (NM_199308)	-408	NM_199308	546071	Mm.250731	NM_199308	ENSMUSG00000031833	Mast3	BC024265|mKIAA0561	microtubule associated serine/threonine kinase 3	protein-coding
chr17	24426410	24426940	promoter-TSS (NM_010023)	promoter-TSS (NM_010023)	-8	NM_010023	13177	Mm.291743	NM_010023	ENSMUSG00000024132	Eci1	Dci|eci	enoyl-Coenzyme A delta isomerase 1	protein-coding
chr13	61771399	61771982	non-coding (NR_028430, exon 1 of 4)	non-coding (NR_028430, exon 1 of 4)	110	NR_028430	432812	Mm.317358	NR_028430		BC052688	-	cDNA sequence BC052688	pseudo
chr11	75461328	75461667	promoter-TSS (NR_030711)	promoter-TSS (NR_030711)	-42	NR_030711	100042498	Mm.482242	NR_030711	ENSMUSG00000085148	Mir22hg	2210403K04Rik|mir-22	Mir22 host gene (non-protein coding)	ncRNA
chr13	62623825	62624404	promoter-TSS (NM_173381)	promoter-TSS (NM_173381)	68	NM_173381	211378	Mm.247448	NM_173381	ENSMUSG00000072066	6720489N17Rik	9330128I06	RIKEN cDNA 6720489N17 gene	protein-coding
chr3	145118410	145118710	promoter-TSS (NM_001162538)	promoter-TSS (NM_001162538)	-29	NM_001162539	52184	Mm.259105	NM_025714	ENSMUSG00000028256	Odf2l	4733401D09Rik|9630045K08Rik|D3Ertd250e	outer dense fiber of sperm tails 2-like	protein-coding
chr14	4855975	4856257	intron (NM_001242945, intron 1 of 6)	CpG	593	NM_001242945	100041306	Mm.360540	NM_001242945	ENSMUSG00000094132	Gm3264	-	predicted gene 3264	protein-coding
chrY	3772544	3773019	intron (NM_001270516, intron 1 of 8).4	intron (NM_001270516, intron 1 of 8).4	1108	NM_001270516	100862398	Mm.4711	NM_001270516	ENSMUSG00000095948	Gm21708	Rbm|Rbmy1a1	predicted gene, 21708	protein-coding
chr8	104591185	104591824	promoter-TSS (NM_001024606)	promoter-TSS (NM_001024606)	32	NM_001024606	382051	Mm.290750	NM_001024606	ENSMUSG00000048371	Pdp2	4833426J09Rik|Gm1705|mKIAA1348	pyruvate dehyrogenase phosphatase catalytic subunit 2	protein-coding
chrX	169991168	169991579	TTS (NM_001290512)	TTS (NM_001290512)	-12456	NR_029457	654820	Mm.34441	NM_001039559	ENSMUSG00000072844	G530011O06Rik	-	RIKEN cDNA G530011O06 gene	ncRNA
chr11	26593573	26593994	5' UTR (NM_027260, exon 1 of 13)	5' UTR (NM_027260, exon 1 of 13)	137	NM_001252447	69922	Mm.285351	NM_027260	ENSMUSG00000064090	Vrk2	2810003O05Rik|AI447698	vaccinia related kinase 2	protein-coding
chrX	52898690	52899265	Intergenic	Intergenic	-13237	NM_027642	70998	Mm.26870	NM_027642	ENSMUSG00000025626	Phf6	2700007B13Rik|4931428F02Rik|mKIAA1823	PHD finger protein 6	protein-coding
chr9	92353334	92353814	intron (NM_001033184, intron 5 of 6)	RLTR17|LTR|ERVK	44197	NM_001033184	78459	Mm.179195	NM_001033184	ENSMUSG00000074139	1700057G04Rik	-	RIKEN cDNA 1700057G04 gene	protein-coding
chr14	31602922	31603401	Intergenic	Intergenic	-25778	NM_009937	382864	Mm.239821	NM_009937	ENSMUSG00000057606	Colq	A130034K24Rik	collagen-like tail subunit (single strand of homotrimer) of asymmetric acetylcholinesterase	protein-coding
chr13	66868052	66868925	Intergenic	CpG	36862	NM_026219	67530	Mm.379136	NM_026219	ENSMUSG00000021520	Uqcrb	2210415M14Rik|QP-C|QPC|UQBC|UQBP|UQPC	ubiquinol-cytochrome c reductase binding protein	protein-coding
chr5	150867510	150867752	Intergenic	Intergenic	-84976	NM_013823	16591	Mm.6500	NM_013823	ENSMUSG00000058488	Kl	alpha-kl	klotho	protein-coding
chr19	58512064	58512387	intron (NM_029372, intron 1 of 8)	intron (NM_029372, intron 1 of 8)	223	NM_029372	75645	Mm.159542	NM_029372	ENSMUSG00000025090	Ccdc172	1700011F14Rik	coiled-coil domain containing 172	protein-coding
chr2	5942730	5942996	promoter-TSS (NM_001081131)	promoter-TSS (NM_001081131)	-71	NM_001081131	209692	Mm.222517	NM_001081131	ENSMUSG00000025815	Dhtkd1	C330018I04Rik	dehydrogenase E1 and transketolase domain containing 1	protein-coding
chr14	67289565	67289811	intron (NM_010095, intron 7 of 16)	(CTGTG)n|Simple_repeat|Simple_repeat	25023	NM_001037931	628416	Mm.390723	NM_001037931		Gm6878	EG628416	predicted gene 6878	protein-coding
chr4	57486357	57487068	Intergenic	MIR|SINE|MIR	-81536	NM_172868	242481	Mm.331630	NM_172868	ENSMUSG00000090053	Palm2	53-H12|B130066I24|R75368|pEN70	paralemmin 2	protein-coding
chr13	100015521	100015840	promoter-TSS (NM_030026)	promoter-TSS (NM_030026)	-41	NM_030026	78038	Mm.137327	NM_030026	ENSMUSG00000021646	Mccc2	4930552N12Rik|MCCB	methylcrotonoyl-Coenzyme A carboxylase 2 (beta)	protein-coding
chr19	4125491	4126045	promoter-TSS (NM_016666)	promoter-TSS (NM_016666)	90	NM_016666	11632	Mm.10433	NM_016666	ENSMUSG00000024847	Aip	AA408703|AW476050|Ara9|D19Bwg1412e|Fkbp16|Xap2	aryl-hydrocarbon receptor-interacting protein	protein-coding
chr2	30981956	30982360	promoter-TSS (NM_028846)	promoter-TSS (NM_028846)	-121	NM_028846	74270	Mm.346654	NM_028846	ENSMUSG00000026854	Usp20	1700055M05Rik|AI467231|Vdu2	ubiquitin specific peptidase 20	protein-coding
chr3	154364773	154365321	Intergenic	Intergenic	34226	NR_040387	99686	Mm.38082	NR_040387	ENSMUSG00000093738	AI606473	-	expressed sequence AI606473	ncRNA
chr5	66764326	66764679	intron (NM_001001980, intron 1 of 25)	intron (NM_001001980, intron 1 of 25)	18613	NM_001001980	77569	Mm.374778	NM_001001980	ENSMUSG00000037736	Limch1	3732412D22Rik|mKIAA1102	LIM and calponin homology domains 1	protein-coding
chr3	10351085	10351645	promoter-TSS (NM_001331014)	promoter-TSS (NM_001331014)	-48	NM_001331013	66361	Mm.371617	NM_025512	ENSMUSG00000039795	Zfand1	2310008M20Rik|AW048890	zinc finger, AN1-type domain 1	protein-coding
chr7	106213921	106214231	intron (NM_029000, intron 1 of 3).2	IAPEY4_LTR|LTR|ERVK	1261	NM_001243040	100042856	Mm.425473	NM_001243039	ENSMUSG00000078606	Gm4070	VLIG-1	predicted gene 4070	protein-coding
chr3	88477851	88478129	Intergenic	Intergenic	15322	NM_019390	16905	Mm.243014	NM_019390	ENSMUSG00000028063	Lmna	Dhe	lamin A	protein-coding
chr17	27105590	27106099	intron (NM_080553, intron 29 of 57)	C-rich|Low_complexity|Low_complexity	14599	NR_106142	102465779		NR_106142	ENSMUSG00000098826	Mir7677	Gm27400|mmu-mir-7677	microRNA 7677	ncRNA
chr1	140245481	140246288	5' UTR (NM_001081027, exon 1 of 28)	5' UTR (NM_001081027, exon 1 of 28)	166	NM_001081027	240776	Mm.483845	NM_001081027	ENSMUSG00000052726	Kcnt2	E330038N15Rik|Slick	potassium channel, subfamily T, member 2	protein-coding
chr4	11966293	11966931	promoter-TSS (NR_040577)	promoter-TSS (NR_040577)	38	NR_040577	100503636	Mm.209078	NR_040577		1700123M08Rik	1600025K15Rik	RIKEN cDNA 1700123M08 gene	ncRNA
chr16	62846698	62847367	promoter-TSS (NM_026577)	promoter-TSS (NM_026577)	8	NM_026577	68146	Mm.96833	NM_026577	ENSMUSG00000022911	Arl13b	A530097K21Rik|A930014M17Rik|Arl2l1|C530009C10Rik|hnn	ADP-ribosylation factor-like 13B	protein-coding
chr14	6203361	6203845	Intergenic	ID4_|SINE|ID	83647	NM_001270812	100861615	Mm.488431	NM_001270812	ENSMUSG00000079396	LOC100861615	-	alpha takusan-like	protein-coding
chr1	158356211	158356513	promoter-TSS (NM_207583)	promoter-TSS (NM_207583)	-102	NM_207583	240843	Mm.329579	NM_207583	ENSMUSG00000004031	Brinp2	6430517E21Rik|BB361039|Fam5b|mKIAA1747	bone morphogenic protein/retinoic acid inducible neural-specific 2	protein-coding
chr1	175625085	175625759	intron (NM_010209, intron 1 of 9)	CpG	213	NM_010209	14194	Mm.41502	NM_010209	ENSMUSG00000026526	Fh1	Fh|Fh-1	fumarate hydratase 1	protein-coding
chr2	20969494	20969956	non-coding (NR_033225, exon 2 of 2)	non-coding (NR_033225, exon 2 of 2)	851	NR_033225	433408	Mm.386941	NR_033225		Gm13375	-	predicted gene 13375	ncRNA
chr2	27129409	27129748	intron (NM_175427, intron 1 of 2)	intron (NM_175427, intron 1 of 2)	12899	NM_175427	109349	Mm.314080	NM_175427	ENSMUSG00000009216	Fam163b	C630035N08Rik	family with sequence similarity 163, member B	protein-coding
chr14	122534094	122534570	promoter-TSS (NM_144844)	promoter-TSS (NM_144844)	4	NM_144844	110821	Mm.23876	NM_144844	ENSMUSG00000041650	Pcca	C79630	propionyl-Coenzyme A carboxylase, alpha polypeptide	protein-coding
chr5	106574587	106574967	Intergenic	CpG	-116611	NM_001005477	104382	Mm.271593	NM_001005477	ENSMUSG00000034384	Barhl2	E130309B19Rik|MBH1	BarH like homeobox 2	protein-coding
chr9	110665860	110666208	intron (NM_028312, intron 1 of 6)	intron (NM_028312, intron 1 of 6)	9531	NM_028312	72654	Mm.249115	NM_028312	ENSMUSG00000019659	Ccdc12	2700094L05Rik|C76605	coiled-coil domain containing 12	protein-coding
chr16	57231384	57231814	promoter-TSS (NM_026254)	promoter-TSS (NM_026254)	-133	NM_001358433	67581	Mm.257819	NM_026254	ENSMUSG00000022749	Tbc1d23	4930451A13Rik|AU015720|AU043671|AU043778|D030022P07Rik|W51689	TBC1 domain family, member 23	protein-coding
chr17	25474788	25475067	intron (NM_027951, intron 4 of 5)	intron (NM_027951, intron 4 of 5)	3337	NM_027951	71840	Mm.282330	NM_027951	ENSMUSG00000024175	Tekt4	1700010L19Rik	tektin 4	protein-coding
chr10	93081458	93081879	promoter-TSS (NM_001347060)	promoter-TSS (NM_001347060)	-46	NM_001347060	380654	Mm.34980	NM_001347060	ENSMUSG00000020014	Cfap54	4930485B16Rik|Gm872	cilia and flagella associated protein 54	protein-coding
chr12	110446125	110447095	promoter-TSS (NM_001135001)	promoter-TSS (NM_001135001)	-614	NM_001135001	26931	Mm.240396	NM_012023	ENSMUSG00000017843	Ppp2r5c	2610043M05Rik|2700063L20Rik|AI060890|AW545884|C85228|D12Bwg0916e	protein phosphatase 2, regulatory subunit B', gamma	protein-coding
chr11	96829965	96830340	promoter-TSS (NM_008686)	promoter-TSS (NM_008686)	-184	NM_008686	18023	Mm.6743	NM_008686	ENSMUSG00000038615	Nfe2l1	AA408798|AW212678|LCR-F1|Lcrf1|NRF1|TCF-11|TCF11	nuclear factor, erythroid derived 2,-like 1	protein-coding
chr2	68968095	68968441	intron (NM_172856, intron 3 of 9)	intron (NM_172856, intron 3 of 9)	106827	NM_172856	241447	Mm.222222	NM_172856	ENSMUSG00000027035	Cers6	4732462C07Rik|AW544719|Lass6|T1L	ceramide synthase 6	protein-coding
chr7	96848563	96848863	intron (NM_001310760, intron 22 of 32)	intron (NM_001310760, intron 22 of 32)	-47164	NR_045874	791381	Mm.402112	NR_045874	ENSMUSG00000053049	Gm15413	-	predicted gene 15413	ncRNA
chr6	34476001	34476524	promoter-TSS (NM_007563)	promoter-TSS (NM_007563)	-94	NM_001363708	12183	Mm.282863	NM_007563	ENSMUSG00000038871	Bpgm	AI323730|AL022789|C86192	2,3-bisphosphoglycerate mutase	protein-coding
chr15	41515534	41515993	intron (NM_001358977, intron 1 of 16)	intron (NM_001358977, intron 1 of 16)	66660	NM_001358977	170719	Mm.254267	NM_130885	ENSMUSG00000022307	Oxr1	2210416C20Rik|C7|C7B	oxidation resistance 1	protein-coding
chr12	33146825	33147836	promoter-TSS (NM_028139)	promoter-TSS (NM_028139)	256	NR_015602	320046	Mm.208337	NR_015602	ENSMUSG00000052125	F730043M19Rik	-	RIKEN cDNA F730043M19 gene	ncRNA
chr6	53354104	53354372	intron (NM_001327821, intron 1 of 10)	intron (NM_001327821, intron 1 of 10)	66935	NM_001327821	231991	Mm.227444	NM_172728	ENSMUSG00000053007	Creb5	9430076C15Rik|CRE-BPa|Crebpa|D430026C09Rik	cAMP responsive element binding protein 5	protein-coding
chrX	147992794	147993203	promoter-TSS (NM_001198988)	promoter-TSS (NM_001198988)	5	NM_011022	18422	Mm.420007	NM_011022	ENSMUSG00000094885	Ott	AV272316	ovary testis transcribed	protein-coding
chr7	81570964	81571369	promoter-TSS (NM_001004185)	promoter-TSS (NM_001004185)	-126	NM_001004185	434204	Mm.181641	NM_001004185	ENSMUSG00000045795	Whamm	BB081391|Whdc1|mKIAA1971	WAS protein homolog associated with actin, golgi membranes and microtubules	protein-coding
chr4	106606727	106607308	intron (NR_149753, intron 9 of 10)	intron (NR_149753, intron 9 of 10)	10221	NR_149753	242602	Mm.235591	NM_183182	ENSMUSG00000054362	Lexm	-	lymphocyte expansion molecule	protein-coding
chr9	3007127	3007301	Intergenic	GSAT_MM|Satellite|Satellite	31529	NR_039546	100628572		NR_039546	ENSMUSG00000106183	Mir101c	mir-101c|mmu-mir-101c	microRNA 101c	ncRNA
chr12	8771017	8771462	promoter-TSS (NM_011519)	promoter-TSS (NM_011519)	-157	NM_011519	20969	Mm.2580	NM_011519	ENSMUSG00000020592	Sdc1	AA408134|AA409076|CD138|Sstn|Synd|Synd1|syn-1	syndecan 1	protein-coding
chr13	92610860	92611192	promoter-TSS (NM_172588)	promoter-TSS (NM_172588)	-112	NM_172588	218442	Mm.297970	NM_172588	ENSMUSG00000021703	Serinc5	A130038L21Rik|AIGP3|C86123|TPO1	serine incorporator 5	protein-coding
chr11	61174925	61175567	promoter-TSS (NM_001004143)	promoter-TSS (NM_001004143)	-187	NM_001004143	216825	Mm.30602	NM_001004143	ENSMUSG00000042506	Usp22	AI427806	ubiquitin specific peptidase 22	protein-coding
chr2	32727416	32727822	promoter-TSS (NM_001252547)	promoter-TSS (NM_001252547)	-70	NM_001252547	27387	Mm.9593	NM_013781	ENSMUSG00000059013	Sh2d3c	Chat|Nsp3|Shep1	SH2 domain containing 3C	protein-coding
chr3	54692481	54692957	promoter-TSS (NM_019995)	promoter-TSS (NM_019995)	-96	NR_152184	56790	Mm.486375	NM_019995	ENSMUSG00000027751	Supt20	AA667204|AI450544|D3Ertd300e|Fam48a|Supt20h|p38IP	suppressor of Ty 20	protein-coding
chr7	25338873	25339236	intron (NM_001160400, intron 14 of 40)	ZP3AR|Satellite|Satellite	21890	NM_001160400	269878	Mm.38527	NM_001160400	ENSMUSG00000045039	Megf8	AW049492|Egfl4|b2b1702.2Clo|b2b1702Clo|b2b288Clo|m687Ddg|mKIAA0817	multiple EGF-like-domains 8	protein-coding
chr3	92998736	92999470	Intergenic	Intergenic	6886	NM_001018079	69520	Mm.439968	NM_001018079	ENSMUSG00000068885	Lce3f	2310002A05Rik	late cornified envelope 3F	protein-coding
chr7	45515470	45515998	intron (NM_001045555, intron 4 of 13)	intron (NM_001045555, intron 4 of 13)	1132	NM_001290998	56734	Mm.439742	NM_008807	ENSMUSG00000023467	Tulp2	Pdet	tubby-like protein 2	protein-coding
chr1	24376124	24376621	intron (NM_007733, intron 15 of 50)	ORR1B1|LTR|ERVL-MaLR	181169	NM_001290691	12839	Mm.154662	NM_007740	ENSMUSG00000026147	Col9a1	Col9a-1	collagen, type IX, alpha 1	protein-coding
chr17	32350392	32350894	promoter-TSS (NM_017476)	promoter-TSS (NM_017476)	-66	NM_017476	54194	Mm.281005	NM_017476	ENSMUSG00000002625	Akap8l	HAP95|Nakap95	A kinase (PRKA) anchor protein 8-like	protein-coding
chr18	42275066	42275955	promoter-TSS (NR_033452)	promoter-TSS (NR_033452)	157	NM_172626	225432	Mm.329400	NM_172626	ENSMUSG00000024491	Rbm27	A730010I06|AI043120|Psc1|mKIAA1311	RNA binding motif protein 27	protein-coding
chr11	63914278	63914695	intron (NM_018805, intron 1 of 1)	intron (NM_018805, intron 1 of 1)	7798	NM_018805	54710	Mm.274426	NM_018805	ENSMUSG00000070407	Hs3st3b1	3-OST-3B|3OST3B1|3Ost3b|AU041882|AW536289|Hs3st3b|m3-OST-3B	heparan sulfate (glucosamine) 3-O-sulfotransferase 3B1	protein-coding
chr18	5819762	5820115	Intergenic	Intergenic	227291	NM_001360981	21417	Mm.3929	NM_011546	ENSMUSG00000024238	Zeb1	3110032K11Rik|AREB6|BZP|MEB1|Nil2|TCF-8|Tcf18|Tcf8|Tw|ZEB|Zfhep|Zfhx1a|Zfx1a|Zfx1ha|[delta]EF1	zinc finger E-box binding homeobox 1	protein-coding
chr5	8571328	8571680	intron (NM_198620, intron 3 of 9)	intron (NM_198620, intron 3 of 9)	4413	NM_011076	18671	Mm.207354	NM_011076	ENSMUSG00000040584	Abcb1a	Abcb4|Evi32|Mdr1a|Mdr3|P-gp|Pgp|Pgy-3|Pgy3|mdr-3	ATP-binding cassette, sub-family B (MDR/TAP), member 1A	protein-coding
chr13	49169480	49170075	Intergenic	L1M4|LINE|L1	-17752	NM_013610	18081	Mm.18503	NM_013610	ENSMUSG00000037966	Ninj1	AU024536	ninjurin 1	protein-coding
chr9	54917014	54917573	promoter-TSS (NM_177351)	promoter-TSS (NM_177351)	3	NM_177351	235386	Mm.259334	NM_177351	ENSMUSG00000035878	Hykk	Agphd1|C630028N24Rik	hydroxylysine kinase 1	protein-coding
chr5	129787142	129787587	promoter-TSS (NM_133900)	promoter-TSS (NM_133900)	8	NM_009838	12466	Mm.153159	NM_009838		Cct6a	CCT-zeta|CCT-zeta-1|Cct6|Cctz-1|TCP-1-zeta	chaperonin containing Tcp1, subunit 6a (zeta)	protein-coding
chr14	6637200	6637552	Intergenic	Intergenic	119681	NM_001309401	100041151	Mm.396155	NM_001309401	ENSMUSG00000091754	Gm3636	100042043	predicted gene 3636	protein-coding
chr19	43524365	43525191	promoter-TSS (NM_010324)	promoter-TSS (NM_010324)	-173	NM_010324	14718	Mm.19039	NM_010324	ENSMUSG00000025190	Got1	AI789014|Got-1|cAspAT|cCAT	glutamic-oxaloacetic transaminase 1, soluble	protein-coding
chr2	5363860	5364182	intron (NM_001290374, intron 2 of 9)	intron (NM_001290374, intron 2 of 9)	-15369	NR_030601	100124465		NR_030601	ENSMUSG00000078031	Mir466d	Mirn466d	microRNA 466d	ncRNA
chr5	139640047	139640376	Intergenic	ZP3AR|Satellite|Satellite	96122	NM_174850	231830	Mm.240510	NM_174850	ENSMUSG00000036718	Micall2	A930021H16Rik|JRAB|MICAL-L2|mFLJ00139	MICAL-like 2	protein-coding
chr16	17222264	17222492	Intergenic	LSU-rRNA_Hsa|rRNA|rRNA	-11209	NM_178922	58180	Mm.261602	NM_178922	ENSMUSG00000050240	Hic2	AA409108|HRG22|mKIAA1020	hypermethylated in cancer 2	protein-coding
chr13	64432197	64432933	promoter-TSS (NM_053180)	promoter-TSS (NM_053180)	12	NM_053180	105278	Mm.74982	NM_053180	ENSMUSG00000021483	Cdk20	4932702G04Rik|AU019450|AW558027|CDCH|Ccrk|PNQLARE|p42	cyclin-dependent kinase 20	protein-coding
chr14	119007452	119007775	intron (NM_001081252, intron 33 of 38)	ORR1D2|LTR|ERVL-MaLR	69681	NM_008929	100037258	Mm.12616	NM_008929	ENSMUSG00000022136	Dnajc3	AA408985|AU067833|Dnajc3a|Dnajc3b|Prkri|mp58|p58|p58IPK	DnaJ heat shock protein family (Hsp40) member C3	protein-coding
chr4	57956360	57956725	promoter-TSS (NM_011660)	promoter-TSS (NM_011660)	-131	NM_011660	22166	Mm.260618	NM_011660	ENSMUSG00000028367	Txn1	ADF|AW550880|Trx1|Txn	thioredoxin 1	protein-coding
chr8	41217805	41218515	Intergenic	RLTR20B3A_MM|LTR|ERVK	-3004	NM_145594	234199	Mm.277955	NM_145594	ENSMUSG00000031594	Fgl1	Mfire1	fibrinogen-like protein 1	protein-coding
chr11	50713474	50713938	intron (NM_175643, intron 3 of 21)	intron (NM_175643, intron 3 of 21)	111621	NM_175643	216725	Mm.110597	NM_175643	ENSMUSG00000036545	Adamts2	ADAM-TS 2|ADAM-TS2|ADAMTS-2|PC I-NP|PCINP|pNPI	a disintegrin-like and metallopeptidase (reprolysin type) with thrombospondin type 1 motif, 2	protein-coding
chr14	120477363	120477965	promoter-TSS (NM_029519)	promoter-TSS (NM_029519)	-797	NM_029519	76108	Mm.261448	NM_029519	ENSMUSG00000051615	Rap2a	5830461H18Rik	RAS related protein 2a	protein-coding
chr17	5189642	5190385	intron (NM_001085355, intron 4 of 19)	CpG	194939	NM_001085355	239985	Mm.133401	NM_001085355	ENSMUSG00000069729	Arid1b	8030481M12|9330189K18Rik|AI836955|Ardi1b|B230217J03Rik|BAF250B|mKIAA1235	AT rich interactive domain 1B (SWI-like)	protein-coding
chr10	88503820	88504281	promoter-TSS (NM_001146690)	promoter-TSS (NM_001146690)	-80	NM_144807	212862	Mm.288897	NM_144807	ENSMUSG00000060002	Chpt1	-	choline phosphotransferase 1	protein-coding
chr9	79941632	79942017	intron (NM_001357352, intron 1 of 5)	intron (NM_001357352, intron 1 of 5)	20257	NM_001357353	70598	Mm.23049	NM_001081243	ENSMUSG00000034898	Filip1	5730485H21Rik|AI843021	filamin A interacting protein 1	protein-coding
chr8	94601679	94602279	promoter-TSS (NM_001359093)	promoter-TSS (NM_001359093)	38	NM_001359093	67610	Mm.109074	NM_026274	ENSMUSG00000050079	Rspry1	4930470D19Rik|AI608258	ring finger and SPRY domain containing 1	protein-coding
chr12	102730272	102730814	Intergenic	MLT1O|LTR|ERVL-MaLR	13118	NM_022323	64113	Mm.291222	NM_022323	ENSMUSG00000096458	Moap1	AA987038|Map-1|Pnma4	modulator of apoptosis 1	protein-coding
chr14	99298445	99298767	promoter-TSS (NM_009769)	promoter-TSS (NM_009769)	-85	NM_009769	12224	Mm.30262	NM_009769	ENSMUSG00000005148	Klf5	4930520J07Rik|Bteb2|CKLF|IKLF	Kruppel-like factor 5	protein-coding
chr11	73198855	73199634	promoter-TSS (NM_001357892)	promoter-TSS (NM_001357892)	-202	NM_001357891	83429	Mm.259852	NM_031251	ENSMUSG00000005949	Ctns	AI195360|AW049661	cystinosis, nephropathic	protein-coding
chr15	98181160	98181676	Intergenic	Intergenic	13612	NM_177716	239650	Mm.54140	NM_177716	ENSMUSG00000029875	Ccdc184	5630400A08|AI836003	coiled-coil domain containing 184	protein-coding
chr1	9944018	9944273	promoter-TSS (NR_024067)	promoter-TSS (NR_024067)	-27	NR_024067	73824	Mm.28311	NR_024067	ENSMUSG00000098234	Snhg6	1110008H02Rik	small nucleolar RNA host gene 6	ncRNA
chr10	86079918	86080423	intron (NM_013722, intron 8 of 13)	intron (NM_013722, intron 8 of 13)	-15684	NR_038024	78170	Mm.444790	NR_038024	ENSMUSG00000112493	4930486F22Rik	-	RIKEN cDNA 4930486F22 gene	ncRNA
chr12	79687993	79688333	intron (NM_009014, intron 8 of 10)	intron (NM_009014, intron 8 of 10)	236570	NR_131075	77290	Mm.395042	NR_131073	ENSMUSG00000112765	9430078K24Rik	-	RIKEN cDNA 9430078K24 gene	ncRNA
chr7	4866066	4866447	promoter-TSS (NM_026158)	promoter-TSS (NM_026158)	-77	NM_026158	67441	Mm.41385	NM_026158	ENSMUSG00000052605	Isoc2b	0610042E07Rik|AI553388|Isoc2	isochorismatase domain containing 2b	protein-coding
chr10	11352723	11353171	intron (NM_010146, intron 1 of 3)	(CTGTG)n|Simple_repeat|Simple_repeat	9502	NM_010146	13853	Mm.89946	NM_010146	ENSMUSG00000055493	Epm2a	TG-B|Tg(TcraK,TcrbK)TG-BFlv	epilepsy, progressive myoclonic epilepsy, type 2 gene alpha	protein-coding
chr6	99803993	99804654	Intergenic	Intergenic	-77931	NM_015768	50501	Mm.87365	NM_015768	ENSMUSG00000030069	Prok2	Bv8|PK2|Prok1	prokineticin 2	protein-coding
chr2	93068413	93068887	Intergenic	(CTGTG)n|Simple_repeat|Simple_repeat	-22485	NM_001368849	100042784	Mm.102816	NM_001177536	ENSMUSG00000075028	Prdm11	8030443D09Rik|AA163972|Gm29694|Gm707	PR domain containing 11	protein-coding
chr15	102624928	102625614	5' UTR (NM_001310070, exon 1 of 12)	5' UTR (NM_001310070, exon 1 of 12)	193	NM_001310066	223922	Mm.208714	NM_146065	ENSMUSG00000099083	Atf7	1110012F10Rik|9430065F09Rik|AI549878|C130020M04Rik	activating transcription factor 7	protein-coding
chr7	92741328	92741838	promoter-TSS (NM_029494)	promoter-TSS (NM_029494)	-124	NR_015510	666737	Mm.473620	NR_015510	ENSMUSG00000074024	4632427E13Rik	AU015482	RIKEN cDNA 4632427E13 gene	ncRNA
chr4	45011932	45012907	promoter-TSS (NM_001163284)	promoter-TSS (NM_001163284)	-7	NM_001163284	230119	Mm.44222	NM_173399	ENSMUSG00000049657	Zbtb5	5930421I10|9430083K24Rik|AI646847|mKIAA0354	zinc finger and BTB domain containing 5	protein-coding
chr2	131909776	131910379	intron (NM_001278259, intron 1 of 4)	CpG	149	NM_001278259	111368		NM_001278258	ENSMUSG00000098754	Prn	Gm28045|Gm44637|Prnp-Prnd	prion protein readthrough transcript	protein-coding
chr8	119778251	119778608	promoter-TSS (NM_028883)	promoter-TSS (NM_028883)	-13	NM_028883	74347	Mm.358759	NM_028883	ENSMUSG00000034105	Meak7	4632415K11Rik|Kiaa1609|Tldc1	MTOR associated protein , eak-7 homolog	protein-coding
chr14	90702741	90703182	Intergenic	RLTR44B|LTR|ERVK	576070	NR_045712	74967	Mm.390704	NR_045712	ENSMUSG00000115001	4930474H20Rik	-	RIKEN cDNA 4930474H20 gene	ncRNA
chr19	43949229	43949826	Intergenic	G-rich|Low_complexity|Low_complexity	-9329	NM_028029	71972	Mm.159024	NM_028029	ENSMUSG00000025195	Dnmbp	2410003L07Rik|2410003M15Rik|TUBA	dynamin binding protein	protein-coding
chr14	31336372	31336724	promoter-TSS (NM_001360187)	promoter-TSS (NM_001360187)	-90	NM_009796	12339	Mm.201535	NM_009796	ENSMUSG00000021893	Capn7	AU022319|PalBH	calpain 7	protein-coding
chr1	64121559	64122029	promoter-TSS (NM_033563)	promoter-TSS (NM_033563)	-405	NM_033563	93691	Mm.29466	NM_033563	ENSMUSG00000025959	Klf7	9830124P08Rik	Kruppel-like factor 7 (ubiquitous)	protein-coding
chr3	36475530	36476011	promoter-TSS (NM_028183)	promoter-TSS (NM_028183)	117	NM_009673	11747	Mm.1620	NM_009673	ENSMUSG00000027712	Anxa5	Anx5|R74653	annexin A5	protein-coding
chr13	62712613	62712977	Intergenic	Intergenic	-47944	NR_030493	751548		NR_030493	ENSMUSG00000096098	Mir713	Mirn713|mir-713|mmu-mir-713	microRNA 713	ncRNA
chr17	43816466	43816975	intron (NM_001286653, intron 1 of 4)	intron (NM_001286653, intron 1 of 4)	12717	NM_001286653	53901	Mm.251242	NM_030598	ENSMUSG00000039601	Rcan2	Csp2|Dscr1l1|MCIP2|ZAKI-4	regulator of calcineurin 2	protein-coding
chr12	105962558	105963056	Intergenic	Intergenic	-47456	NM_001029843	22367	Mm.2981	NM_011705	ENSMUSG00000021115	Vrk1	51PK	vaccinia related kinase 1	protein-coding
chr3	95015481	95015829	promoter-TSS (NM_030074)	promoter-TSS (NM_030074)	-198	NM_001357863	78266	Mm.389478	NM_030074	ENSMUSG00000019338	Zfp687	4931408L03Rik|Znf687|mKIAA1441	zinc finger protein 687	protein-coding
chr7	44986404	44987071	promoter-TSS (NM_001252477)	promoter-TSS (NM_001252477)	-163	NR_045266	100502630	Mm.490013	NR_045266	ENSMUSG00000087138	Gm15545	-	predicted gene 15545	ncRNA
chr4	72200938	72201228	promoter-TSS (NM_011599)	promoter-TSS (NM_011599)	-161	NR_027923	68285	Mm.37541	NR_027923		C630043F03Rik	AI851307	RIKEN cDNA C630043F03 gene	ncRNA
chr9	28192003	28192335	Intergenic	(CTCA)n|Simple_repeat|Simple_repeat	-212159	NM_177906	330908	Mm.379474	NM_177906	ENSMUSG00000062257	Opcml	2900075O15Rik|3732419F12|AI844366|B930023M13Rik|C230027C17|Gm181|Obcam	opioid binding protein/cell adhesion molecule-like	protein-coding
chr8	11354187	11354729	intron (NM_009932, intron 4 of 47)	intron (NM_009932, intron 4 of 47)	-41632	NM_009931	12826	Mm.738	NM_009931	ENSMUSG00000031502	Col4a1	Bru|Col4a-1|Raw|Svc	collagen, type IV, alpha 1	protein-coding
chr10	100487117	100487929	promoter-TSS (NM_001110013)	promoter-TSS (NM_001110013)	-59	NM_146009	216274	Mm.229114	NM_146009	ENSMUSG00000019971	Cep290	BC004690|Nphp6|b2b1454Clo|b2b1752Clo	centrosomal protein 290	protein-coding
chr5	138279959	138280392	promoter-TSS (NM_172412)	promoter-TSS (NM_172412)	-238	NM_172412	71951	Mm.77066	NM_172412	ENSMUSG00000029510	Gpc2	2410016G05Rik	glypican 2 (cerebroglycan)	protein-coding
chr16	90810202	90810756	promoter-TSS (NM_029497)	promoter-TSS (NM_029497)	-66	NM_029497	207932	Mm.328688	NM_029497	ENSMUSG00000039929	Urb1	4921511H13Rik|5730405K23Rik|AA670781|AI645590|mKIAA0539	URB1 ribosome biogenesis 1 homolog (S. cerevisiae)	protein-coding
chr8	63951891	63952310	promoter-TSS (NM_001195687)	promoter-TSS (NM_001195687)	70	NM_001195687	244495	Mm.485331	NM_001195687	ENSMUSG00000094443	Sgo2b	EG244495|Gm4975|Sgol2b	shugoshin 2B	protein-coding
chr9	66124816	66125055	promoter-TSS (NM_019727)	promoter-TSS (NM_019727)	-49	NM_019727	56440	Mm.271891	NM_019727	ENSMUSG00000032382	Snx1	-	sorting nexin 1	protein-coding
chr12	41023815	41024311	promoter-TSS (NM_053122)	promoter-TSS (NM_053122)	-27	NM_053122	93757	Mm.363813	NM_053122	ENSMUSG00000056899	Immp2l	AI853880|IMP2|Tg(HLA-A/H2-D)2Enge	IMP2 inner mitochondrial membrane peptidase-like (S. cerevisiae)	protein-coding
chr13	65982748	65983242	Intergenic	RLTR45-int|LTR|ERVK	-130458	NM_001177832	628709	Mm.390595	NM_001177832	ENSMUSG00000095909	Gm10324	-	predicted gene 10324	protein-coding
chr5	142701303	142702134	promoter-TSS (NM_146257)	promoter-TSS (NM_146257)	-383	NM_146257	243328	Mm.125942	NM_146257	ENSMUSG00000050822	Slc29a4	ENT4|mPMAT	solute carrier family 29 (nucleoside transporters), member 4	protein-coding
chr16	5146596	5147125	promoter-TSS (NM_001127725)	promoter-TSS (NM_001127725)	-249	NM_001127725	665119	Mm.102072	NM_001127725	ENSMUSG00000091712	Sec14l5	-	SEC14-like lipid binding 5	protein-coding
chr12	118020422	118020816	intron (NM_010060, intron 45 of 81)	intron (NM_010060, intron 45 of 81)	176758	NM_146040	217946	Mm.281149	NM_146040	ENSMUSG00000021175	Cdca7l	BC006933|JPO2	cell division cycle associated 7 like	protein-coding
chr2	72196285	72196539	intron (NM_019688, intron 11 of 29)	intron (NM_019688, intron 11 of 29)	-89225	NM_023057	65964	Mm.304143	NM_023057	ENSMUSG00000004085	Map3k20	AV006891|B230120H23Rik|HCCS-4|MLTK|MLTKalpha|MLTKbeta|Zak	mitogen-activated protein kinase kinase kinase 20	protein-coding
chr7	126396667	126397072	promoter-TSS (NM_010900)	promoter-TSS (NM_010900)	-132	NM_010900	18020	Mm.1389	NM_010900	ENSMUSG00000030722	Nfatc2ip	D7Ertd304e|NIP45	nuclear factor of activated T cells, cytoplasmic, calcineurin dependent 2 interacting protein	protein-coding
chrX	160765725	160766368	Intergenic	CpG	-1967	NM_011302	20147	Mm.41982	NM_011302	ENSMUSG00000031293	Rs1	Rs1h|Xlrs1|tmgc1	retinoschisis (X-linked, juvenile) 1 (human)	protein-coding
chr1	139379079	139379842	promoter-TSS (NR_040455)	promoter-TSS (NR_040455)	8	NR_040455	71209	Mm.158619	NR_040455	ENSMUSG00000103844	4933436E23Rik	-	RIKEN cDNA 4933436E23 gene	ncRNA
chr4	129461126	129461701	promoter-TSS (NM_133889)	promoter-TSS (NM_133889)	-266	NM_133889	100383	Mm.17918	NM_133889	ENSMUSG00000040859	Bsdc1	1110063F24Rik|AW011758	BSD domain containing 1	protein-coding
chr11	78550570	78551013	promoter-TSS (NM_133706)	promoter-TSS (NM_133706)	-56	NM_133706	69071	Mm.29431	NM_133706	ENSMUSG00000037278	Tmem97	1810014L12Rik|AI115531|AL022956|D11Bhm182e	transmembrane protein 97	protein-coding
chr10	18352845	18353124	Intergenic	ORR1E|LTR|ERVL-MaLR	-54691	NM_173390	215819	Mm.297971	NM_173390	ENSMUSG00000039835	Nhsl1	5730409E15Rik|A630035H13Rik|A730096F01|BC013565|D10Bwg0940e|mKIAA1357	NHS-like 1	protein-coding
chr3	10012330	10012590	promoter-TSS (NM_010634)	promoter-TSS (NM_010634)	-125	NM_010634	16592	Mm.741	NM_010634	ENSMUSG00000027533	Fabp5	E-FABP|Fabpe|Klbp|PA-FABP|mal1	fatty acid binding protein 5, epidermal	protein-coding
chr9	63007486	63007736	Intergenic	Intergenic	-26732	NM_019663	56469	Mm.431253	NM_019663	ENSMUSG00000032405	Pias1	2900068C24Rik|Ddxbp1|GBP	protein inhibitor of activated STAT 1	protein-coding
chr13	65746730	65747437	Intergenic	Intergenic	-366370	NM_001177832	628709	Mm.390595	NM_001177832	ENSMUSG00000095909	Gm10324	-	predicted gene 10324	protein-coding
chr2	168252685	168253050	Intergenic	Intergenic	16464	NM_001081134	241794	Mm.425102	NM_001081134	ENSMUSG00000074575	Kcng1	AW536275	potassium voltage-gated channel, subfamily G, member 1	protein-coding
chr18	3982290	3982602	Intergenic	Intergenic	-183386	NM_026092	67328	Mm.158148	NM_026092	ENSMUSG00000024233	Lyzl1	1700038F02Rik|Lyc2|Lyzd1	lysozyme-like 1	protein-coding
chr7	116503989	116504860	promoter-TSS (NM_001130479)	promoter-TSS (NM_001130479)	55	NM_001130479	53322	Mm.9901	NM_016773	ENSMUSG00000030659	Nucb2	AI607786|Calnuc|Nefa|Nesfatin-1	nucleobindin 2	protein-coding
chr9	63124141	63124421	Intergenic	Intergenic	22699	NM_172446	207667	Mm.36349	NM_172446	ENSMUSG00000022245	Skor1	AV273001|C230094B15Rik|Corl1|Lbxcor1	SKI family transcriptional corepressor 1	protein-coding
chr14	77483152	77483416	intron (NR_033141, intron 4 of 5)	C-rich|Low_complexity|Low_complexity	23584	NR_033141	629678	Mm.390721	NM_001037935	ENSMUSG00000067973	Gm6994	EG629678	predicted gene 6994	ncRNA
chr1	136131072	136131626	promoter-TSS (NR_046168)	promoter-TSS (NR_046168)	-41	NM_001039472	16565	Mm.276135	NM_019962	ENSMUSG00000041642	Kif21b	2610511N21Rik|mKIAA0449	kinesin family member 21B	protein-coding
chr5	77357711	77357997	intron (NM_008048, intron 1 of 4)	intron (NM_008048, intron 1 of 4)	47370	NM_153798	231329	Mm.273217	NM_153798	ENSMUSG00000029250	Polr2b	Pol2rb|Rpb140|Rpb2	polymerase (RNA) II (DNA directed) polypeptide B	protein-coding
chr5	116962850	116963519	Intergenic	Intergenic	152809	NM_178622	71954	Mm.34456	NM_178622	ENSMUSG00000066900	Suds3	2400003N08Rik|2410008L21Rik|AU067672|mSds3	suppressor of defective silencing 3 homolog (S. cerevisiae)	protein-coding
chr6	87671801	87672569	promoter-TSS (NM_024251)	promoter-TSS (NM_024251)	-17	NM_001170489	72103	Mm.31770	NM_024251	ENSMUSG00000030051	Aplf	2010301N04Rik|AI452191	aprataxin and PNKP like factor	protein-coding
chrX	106186759	106187131	promoter-TSS (NM_008828)	promoter-TSS (NM_008828)	-155	NM_008828	18655	Mm.316355	NM_008828	ENSMUSG00000062070	Pgk1	Pgk-1	phosphoglycerate kinase 1	protein-coding
chr17	63396186	63396735	intron (NM_015794, intron 4 of 8)	intron (NM_015794, intron 4 of 8)	-83487	NR_130176	414079	Mm.444282	NR_130176	ENSMUSG00000090565	4930405O22Rik	-	RIKEN cDNA 4930405O22 gene	ncRNA
chr1	179448737	179449259	intron (NM_027188, intron 1 of 11)	intron (NM_027188, intron 1 of 11)	69043	NM_027188	69726	Mm.222338	NM_027188	ENSMUSG00000055067	Smyd3	2410008A19Rik|Zmynd1	SET and MYND domain containing 3	protein-coding
chr12	84772816	84773679	promoter-TSS (NM_028863)	promoter-TSS (NM_028863)	-23	NM_028863	74316	Mm.25719	NM_028863	ENSMUSG00000021241	Isca2	0710001C05Rik|5730594E03Rik|Hbld1	iron-sulfur cluster assembly 2	protein-coding
chr5	121099411	121100044	Intergenic	Intergenic	-89635	NM_001302344	19894	Mm.181166	NM_011286	ENSMUSG00000029608	Rph3a	2900002P20Rik|AU022689|AW108370	rabphilin 3A	protein-coding
chr1	134344505	134344894	Intergenic	CpG	-11771	NM_001144855	68507	Mm.295105	NM_001144855	ENSMUSG00000026458	Ppfia4	100042382|1110008G13Rik|AI448359|AI852265|C81506|Gm3812	protein tyrosine phosphatase, receptor type, f polypeptide (PTPRF), interacting protein (liprin), alpha 4	protein-coding
chr13	46011242	46011641	Intergenic	Intergenic	-46450	NM_001199305	20238	Mm.342683	NM_009124	ENSMUSG00000046876	Atxn1	2900016G23Rik|Atx1|C85907|Gm10786|Sca1	ataxin 1	protein-coding
chr11	22286823	22287354	promoter-TSS (NM_001252515)	promoter-TSS (NM_001252515)	-293	NM_153078	216565	Mm.491265	NM_153078	ENSMUSG00000042302	Ehbp1	AF424697|Flj21950|NACSIN	EH domain binding protein 1	protein-coding
chr19	60873923	60874700	intron (NM_007452, intron 1 of 6)	intron (NM_007452, intron 1 of 6)	227	NM_007452	11757	Mm.29821	NM_007452	ENSMUSG00000024997	Prdx3	AW822249|Aop1|D0Tohi1|Ef2l|Mer5|Prx3|SP22|TDXM	peroxiredoxin 3	protein-coding
chr9	108759820	108760180	Intergenic	B3|SINE|B2	-35994	NM_029634	76500	Mm.276336	NM_029634	ENSMUSG00000032599	Ip6k2	1500005N04Rik|AW050208|Ihpk2	inositol hexaphosphate kinase 2	protein-coding
chr9	31890074	31890661	intron (NM_013800, intron 1 of 3)	intron (NM_013800, intron 1 of 3)	22918	NM_013800	12023	Mm.261044	NM_013800	ENSMUSG00000032033	Barx2	2310006E12Rik|Barx2b	BarH-like homeobox 2	protein-coding
chr2	174908301	174908767	Intergenic	Intergenic	147915	NM_007903	13616	Mm.9478	NM_007903	ENSMUSG00000027524	Edn3	ET-3|PPET3|ls|tmgc48	endothelin 3	protein-coding
chr13	93096612	93096952	non-coding (NR_046182, exon 4 of 4)	non-coding (NR_046182, exon 4 of 4)	1949	NR_046182	408254	Mm.474857	NR_046182	ENSMUSG00000114968	A630019I02Rik	-	RIKEN cDNA A630019I02 gene	ncRNA
chr11	79213909	79214408	Intergenic	Intergenic	28866	NM_001042565	78889	Mm.307022	NM_019653	ENSMUSG00000017677	Wsb1	1110056B13Rik|2700038M07Rik	WD repeat and SOCS box-containing 1	protein-coding
chr1	92180195	92180788	promoter-TSS (NM_207225)	promoter-TSS (NM_207225)	-150	NM_207225	208727	Mm.318567	NM_207225	ENSMUSG00000026313	Hdac4	4932408F19Rik|HD4	histone deacetylase 4	protein-coding
chr11	117004231	117004613	Intergenic	Intergenic	-72361	NR_027059	76972	Mm.309167	NR_027059	ENSMUSG00000086859	Snhg20	2810008D09Rik	small nucleolar RNA host gene 20	ncRNA
chr1	194938665	194939284	exon (NM_001111059, exon 1 of 8)	exon (NM_001111059, exon 1 of 8)	153	NM_001111059	12490	Mm.29798	NM_133654	ENSMUSG00000016494	Cd34	AU040960	CD34 antigen	protein-coding
chr1	161256977	161257288	Intergenic	Intergenic	-5922	NR_130150	11758	Mm.186185	NM_007453	ENSMUSG00000026701	Prdx6	1-Cys Prx|1-cysPrx|9430088D19Rik|AA690119|Aop2|Brp-12|CP-3|GPx|Ltw-4|Ltw4|Lvtw-4|NSGPx|ORF06|Prdx5|aiPLA2	peroxiredoxin 6	protein-coding
chr8	122989578	122990077	intron (NM_001081379, intron 1 of 12)	intron (NM_001081379, intron 1 of 12)	52457	NM_001081379	77087	Mm.31567	NM_001081379	ENSMUSG00000035569	Ankrd11	2410104C19Rik|3010027A04Rik|6330578C09Rik|9530048I21Rik|AA930108|Gm176|Yod	ankyrin repeat domain 11	protein-coding
chr3	104758415	104758868	Intergenic	CpG	18906	NM_183224	329731	Mm.389494	NM_183224	ENSMUSG00000055865	Tafa3	7530404M11Rik|Fam19a3|Sam3|Tafa-3	TAFA chemokine like family member 3	protein-coding
chr13	4605920	4606180	intron (NM_018859, intron 2 of 9)	intron (NM_018859, intron 2 of 9)	3114	NM_018859	56043	Mm.251908	NM_018859	ENSMUSG00000045410	Akr1e1	1810061I10Rik|Akr1e2	aldo-keto reductase family 1, member E1	protein-coding
chr8	33109187	33109543	Intergenic	Intergenic	-159339	NM_001177589	100042715	Mm.291093	NM_001177589		Gm3985	-	predicted gene 3985	protein-coding
chr13	104109325	104109772	promoter-TSS (NM_029447)	promoter-TSS (NM_029447)	66	NM_029447	75805	Mm.127692	NM_029447	ENSMUSG00000021710	Nln	4930472G13Rik|C79345	neurolysin (metallopeptidase M3 family)	protein-coding
chr10	51677425	51678112	promoter-TSS (NM_001159389)	promoter-TSS (NM_001159389)	8	NM_001159389	320995	Mm.109190	NM_177306	ENSMUSG00000019900	Rfx6	4930572O07Rik|Rfxdc1	regulatory factor X, 6	protein-coding
chr19	29629038	29629536	intron (NM_001081213, intron 6 of 14)	intron (NM_001081213, intron 6 of 14)	19128	NM_001081213	226090	Mm.267131	NM_001081213	ENSMUSG00000046324	Ermp1	D19Ertd410e|D19Wsu12e|Fxna|b2b2633Clo|mKIAA1815	endoplasmic reticulum metallopeptidase 1	protein-coding
chr7	45054218	45054579	intron (NM_022999, intron 6 of 6)	intron (NM_022999, intron 6 of 6)	-1064	NM_175022	233210	Mm.219137	NM_175022	ENSMUSG00000046574	Prr12	6720469B10|BC058674	proline rich 12	protein-coding
chr11	120086732	120087158	promoter-TSS (NM_009734)	promoter-TSS (NM_009734)	-118	NM_009734	12009	Mm.2556	NM_009734	ENSMUSG00000039781	Cep131	AZ1|Azi|Azi1	centrosomal protein 131	protein-coding
chr14	46912038	46912301	intron (NM_001037221, intron 2 of 12)	intron (NM_001037221, intron 2 of 12)	29204	NM_001037221	74480	Mm.214454	NM_028966	ENSMUSG00000021838	Samd4	1700024G08Rik|1700111L17Rik|4933436G17Rik|Samd4a|Smaug|Smaug1|sunk	sterile alpha motif domain containing 4	protein-coding
chr5	148267589	148267867	intron (NM_001359511, intron 1 of 6)	intron (NM_001359511, intron 1 of 6)	2511	NM_001359511	77521	Mm.244177	NM_029920	ENSMUSG00000029651	Mtus2	5730592G18Rik|A730013O20Rik|AU067634|C130038G02Rik|Cazip|Gm763|mKIAA0774	microtubule associated tumor suppressor candidate 2	protein-coding
chr4	134704180	134704899	promoter-TSS (NM_207237)	promoter-TSS (NM_207237)	-249	NM_207237	230815	Mm.18905	NM_207237	ENSMUSG00000037306	Man1c1	AI593348	mannosidase, alpha, class 1C, member 1	protein-coding
chr13	56097818	56098287	intron (NM_012015, intron 4 of 8)	intron (NM_012015, intron 4 of 8)	37498	NM_001159513	26914	Mm.283802	NM_012015	ENSMUSG00000015937	H2afy	H2AF12M|mH2a1|macroH2A1	H2A histone family, member Y	protein-coding
chr19	57187220	57187512	intron (NM_001362445, intron 1 of 20)	intron (NM_001362445, intron 1 of 20)	10265	NM_001290815	226251	Mm.217161	NM_178688	ENSMUSG00000025085	Ablim1	2210411C18Rik|2610209L21Rik|4833406P10Rik|9330196J19Rik|AV079770|AW060987|AW215784|Limab1|mKIAA0059	actin-binding LIM protein 1	protein-coding
chr1	189119064	189119297	Intergenic	Lx9|LINE|L1	-111340	NM_001359576	226823	Mm.209880	NM_172650	ENSMUSG00000026608	Kctd3	4930438A20Rik|9330185B06|E330032J19Rik|NY-REN-45	potassium channel tetramerisation domain containing 3	protein-coding
chr12	40223166	40223629	promoter-TSS (NR_035459)	promoter-TSS (NR_035459)	33	NR_045157	629820	Mm.435540	NR_045157	ENSMUSG00000035983	Gm7008	EG629820	predicted gene 7008	ncRNA
chr13	14125653	14126028	intron (NM_194262, intron 3 of 23)	PB1D10|SINE|Alu	62056	NM_194262	94246	Mm.439784	NM_194262	ENSMUSG00000039219	Arid4b	BCAA|BRCAA1|RBBP1L1|Rbp1l1|SAP180	AT rich interactive domain 4B (RBP1-like)	protein-coding
chr14	4048421	4049035	Intergenic	Lx8|LINE|L1	24787	NM_001029930	545007	Mm.449725	NM_001029930	ENSMUSG00000096775	Gm5796	-	predicted gene 5796	protein-coding
chr7	99415522	99415835	intron (NM_201352, intron 3 of 17)	L1MC2|LINE|L1	34160	NM_201352	233552	Mm.286317	NM_201352	ENSMUSG00000035314	Gdpd5	BC024955|Gde2	glycerophosphodiester phosphodiesterase domain containing 5	protein-coding
chr16	5255839	5256360	promoter-TSS (NM_027446)	promoter-TSS (NM_027446)	-143	NM_027446	70511	Mm.45780	NM_027446	ENSMUSG00000022544	Eef2kmt	5730409G15Rik|Fam86|Fam86a|eEF2-KMT	eukaryotic elongation factor 2 lysine methyltransferase	protein-coding
chr10	108893359	108893609	intron (NM_001252342, intron 2 of 10)	intron (NM_001252342, intron 2 of 10)	115627	NM_001358506	20979	Mm.289702	NM_009306	ENSMUSG00000035864	Syt1	AW124717|G630098F17Rik|SytI	synaptotagmin I	protein-coding
chr19	58283936	58284150	intron (NM_010279, intron 6 of 10)	intron (NM_010279, intron 6 of 10)	-12161	NR_040449	791347	Mm.452208	NR_040449		Gm10007	-	predicted gene 10007	ncRNA
chr5	99216708	99216972	TTS (NM_181318)	TTS (NM_181318)	36087	NM_181318	320292	Mm.259074	NM_145839	ENSMUSG00000089809	Rasgef1b	4732452O09Rik|GPIgamma4|Gpig4	RasGEF domain family, member 1B	protein-coding
chr5	97717361	97717815	Intergenic	(CACAG)n|Simple_repeat|Simple_repeat	-260565	NM_010294	14626	Mm.61206	NM_010294	ENSMUSG00000050553	Gk2	GKTA|Gk-rs2	glycerol kinase 2	protein-coding
chr6	128355435	128356267	promoter-TSS (NM_011657)	promoter-TSS (NM_011657)	0	NM_011657	22158	Mm.291783	NM_011657	ENSMUSG00000001521	Tulp3	2310022L06Rik|AI316887	tubby-like protein 3	protein-coding
chr13	66862012	66862465	Intergenic	Intergenic	43112	NM_026219	67530	Mm.379136	NM_026219	ENSMUSG00000021520	Uqcrb	2210415M14Rik|QP-C|QPC|UQBC|UQBP|UQPC	ubiquinol-cytochrome c reductase binding protein	protein-coding
chr17	55712149	55712397	intron (NR_151542, intron 1 of 16)	intron (NR_151542, intron 1 of 16)	363	NM_028370	72836	Mm.177073	NM_028370	ENSMUSG00000024174	Pot1b	2810458H16Rik	protection of telomeres 1B	protein-coding
chr7	28638587	28639088	Intergenic	ZP3AR|Satellite|Satellite	-7924	NM_175319	101744	Mm.26022	NM_175319	ENSMUSG00000037469	Acp7	AU017076|C330005M16Rik|Papl	acid phosphatase 7, tartrate resistant	protein-coding
chr3	83789454	83790262	Intergenic	CpG	23537	NM_009144	20319	Mm.19155	NM_009144	ENSMUSG00000027996	Sfrp2	AI851596|Sdf5	secreted frizzled-related protein 2	protein-coding
chr15	28368167	28368471	intron (NM_133365, intron 50 of 78)	MTE2a|LTR|ERVL-MaLR	164553	NM_133365	110082	Mm.248464	NM_133365	ENSMUSG00000022262	Dnah5	AU022615|Dnahc5|Mdnah5|b2b1134Clo|b2b1154Clo|b2b1537Clo|b2b1565Clo|b2b3491Clo|b2b601Clo|mKIAA1603	dynein, axonemal, heavy chain 5	protein-coding
chr3	66078093	66078491	intron (NM_145820, intron 12 of 13)	intron (NM_145820, intron 12 of 13)	-120043	NM_001355433	56706	Mm.175612	NM_019937	ENSMUSG00000027829	Ccnl1	2610030E23Rik|AU018493|Ccnl|ania-6a	cyclin L1	protein-coding
chr18	23917414	23917608	Intergenic	Lx|LINE|L1	-37177	NM_027007	69256	Mm.218343	NM_027007	ENSMUSG00000024276	Zfp397	2810411K16Rik|6720480F11Rik|AI461664	zinc finger protein 397	protein-coding
chr7	111967801	111968032	Intergenic	Intergenic	-55590	NM_133758	74996	Mm.16974	NM_133758	ENSMUSG00000059263	Usp47	4930502N04Rik|A630020C16Rik	ubiquitin specific peptidase 47	protein-coding
chr2	63819385	63819675	Intergenic	Intergenic	-244242	NR_152174	667257	Mm.417007	NR_152174		Gm8541	EG667257	predicted gene 8541	ncRNA
chrM	14073	16161	NA	Intergenic	NA	NA
chr2	45596666	45597006	Intergenic	RMER1C|Other|Other	-99769	NR_040497	69405	Mm.396184	NR_040497	ENSMUSG00000086202	1700019E08Rik	-	RIKEN cDNA 1700019E08 gene	ncRNA
chr15	64626268	64626747	Intergenic	Intergenic	-243588	NM_001276467	13196	Mm.277236	NM_010026	ENSMUSG00000022377	Asap1	AV239055|DEF-1|Ddef1|PAP|mKIAA1249|s19	ArfGAP with SH3 domain, ankyrin repeat and PH domain1	protein-coding
chrY	12437797	12438231	Intergenic	Intergenic	56025	NM_001199332	100041550	Mm.485768	NM_001199332	ENSMUSG00000095520	Gm20877	-	predicted gene, 20877	protein-coding
chr2	112284382	112284759	promoter-TSS (NM_133648)	promoter-TSS (NM_133648)	-118	NM_133648	107723	Mm.491155	NM_133648	ENSMUSG00000027130	Slc12a6	9530023I19Rik|KCC3|gaxp	solute carrier family 12, member 6	protein-coding
chr14	7765828	7766223	Intergenic	Intergenic	-51932	NM_001081427	286940	Mm.489652	NM_134080	ENSMUSG00000025278	Flnb	AL024016|Fln-b	filamin, beta	protein-coding
chr3	39703003	39703207	Intergenic	IMPB_01|Satellite|Satellite	816165	NM_183221	329628	Mm.316210	NM_183221	ENSMUSG00000046743	Fat4	6030410K14Rik|9430004M15	FAT atypical cadherin 4	protein-coding
chr7	19435024	19435621	intron (NM_001368427, intron 10 of 17)	ZP3AR|Satellite|Satellite	-13905	NR_073015	100503495	Mm.410762	NR_073014	ENSMUSG00000040705	A930016O22Rik	-	RIKEN cDNA A930016O22 gene	ncRNA
chr5	63412934	63413396	Intergenic	(CA)n|Simple_repeat|Simple_repeat	-235938	NM_177006	319807	Mm.319487	NM_028470	ENSMUSG00000090061	Nwd2	3110047P20Rik|B830017A01Rik|Hn1-ps2|mKIAA1239	NACHT and WD repeat domain containing 2	protein-coding
chrX	135329293	135329762	Intergenic	Intergenic	27211	NM_031390	83565	Mm.108239	NM_031390	ENSMUSG00000067360	Pramel3	-	preferentially expressed antigen in melanoma-like 3	protein-coding
chr5	150370910	150371111	intron (NM_172887, intron 13 of 60)	B1_Mur1|SINE|Alu	111080	NM_172887	320365	Mm.216590	NM_172887	ENSMUSG00000056602	Fry	13CDNA73|9330186A19Rik|AF346502|AI462658|C87180|D930046M03|cg003|mKIAA4143	FRY microtubule binding protein	protein-coding
chr1	33944717	33945283	intron (NM_001276764, intron 2 of 102)	intron (NM_001276764, intron 2 of 102)	36775	NM_001276764	13518	Mm.336625	NM_010081	ENSMUSG00000026131	Dst	2310001O04Rik|A830042E19Rik|AW554249|BP230|BPAG1-n|Bpag|Bpag1|Macf2|ah|athetoid|dt|mKIAA0728|nmf203|nmf339	dystonin	protein-coding
chr1	28622716	28623245	Intergenic	RLTR44B|LTR|ERVK	157272	NM_001013750	210962	Mm.214178	NM_001013750	ENSMUSG00000048411	Gm597	-	predicted gene 597	protein-coding
chr8	41085473	41085747	intron (NM_001005863, intron 1 of 13)	MLT1B|LTR|ERVL-MaLR	29057	NM_001286413	102103	Mm.149438	NM_001005863	ENSMUSG00000045636	Mtus1	AI481402|ATBP135|Atip1|B430010I23Rik|B430305I03Rik|C85752|Cctsg1-440|MD44|MTSG1|mKIAA1288	mitochondrial tumor suppressor 1	protein-coding
chr17	61056833	61057123	Intergenic	RLTR30E_MM|LTR|ERV1	1824339	NM_207654	13640	Mm.7978	NM_010109	ENSMUSG00000048915	Efna5	AL-1|AV158822|EFL-5|Ephrin-A5|Epl7|LERK-7|RAGS	ephrin A5	protein-coding
chr3	75956652	75957305	promoter-TSS (NM_001291069)	promoter-TSS (NM_001291069)	-29	NM_001291069	73124	Mm.249232	NM_175193	ENSMUSG00000034109	Golim4	3110027H23Rik|GIMPC|GPP130|Golph4|P138	golgi integral membrane protein 4	protein-coding
chr4	26346393	26347060	promoter-TSS (NM_172865)	promoter-TSS (NM_172865)	-74	NM_172865	242362	Mm.245602	NM_172865	ENSMUSG00000040520	Manea	4932703L02Rik	mannosidase, endo-alpha	protein-coding
chr3	104101363	104101830	intron (NM_001159354, intron 2 of 20)	intron (NM_001159354, intron 2 of 20)	118810	NM_001159354	99470	Mm.264849	NM_133853	ENSMUSG00000052539	Magi3	4732496O19Rik|6530407C02Rik|AA407180|AI120132|mKIAA1634	membrane associated guanylate kinase, WW and PDZ domain containing 3	protein-coding
chr4	41803789	41804237	Intergenic	Intergenic	-29837	NR_154591	20301	Mm.335946	NM_011336	ENSMUSG00000073888	Ccl27a	ALP|AW558992|CTACK|CTAK|Ccl27|ESkine|ILC|PESKY|Scya27|Scya27a	chemokine (C-C motif) ligand 27A	protein-coding
chr9	53508096	53508639	intron (NM_007499, intron 14 of 62)	RLTR16|LTR|ERVK	28304	NM_007499	11920	Mm.5088	NM_007499	ENSMUSG00000034218	Atm	AI256621|C030026E19Rik	ataxia telangiectasia mutated	protein-coding
chr14	6180893	6181240	Intergenic	Intergenic	106184	NM_001270812	100861615	Mm.488431	NM_001270812	ENSMUSG00000079396	LOC100861615	-	alpha takusan-like	protein-coding
chr1	107589911	107590353	5' UTR (NM_011459, exon 1 of 7)	5' UTR (NM_011459, exon 1 of 7)	126	NM_001159748	20725	Mm.83909	NM_011459	ENSMUSG00000026315	Serpinb8	CAP-2|CAP2|NK10|Spi8|ovalbumin	serine (or cysteine) peptidase inhibitor, clade B, member 8	protein-coding
chr3	153333279	153333980	intron (NM_011372, intron 3 of 4)	intron (NM_011372, intron 3 of 4)	-34980	NR_126464	75489	Mm.443252	NR_126464	ENSMUSG00000105023	1700012D16Rik	-	RIKEN cDNA 1700012D16 gene	ncRNA
chr1	74175846	74176161	Intergenic	Intergenic	18628	NM_178241	227288	Mm.337035	NM_178241	ENSMUSG00000048480	Cxcr1	Il8ra	chemokine (C-X-C motif) receptor 1	protein-coding
chr7	102210146	102210530	promoter-TSS (NM_001287166)	promoter-TSS (NM_001287166)	3	NM_001291358	233575	Mm.302013	NM_145583	ENSMUSG00000030990	Pgap2	1810006G21Rik|C76649|Frag1	post-GPI attachment to proteins 2	protein-coding
chrX	48623451	48623839	promoter-TSS (NM_001290703)	promoter-TSS (NM_001290703)	-29	NM_001290705	20523	Mm.34953	NM_011398	ENSMUSG00000031105	Slc25a14	BMCP1|UCP5|UCP5L|UCP5S	solute carrier family 25 (mitochondrial carrier, brain), member 14	protein-coding
chr6	4065308	4065747	Intergenic	Intergenic	-17943	NR_131108	78034	Mm.243851	NR_131108	ENSMUSG00000107681	4930528H21Rik	Gm43986	RIKEN cDNA 4930528H21 gene	ncRNA
chrX	148281657	148282114	intron (NM_001122734, intron 4 of 6).4	intron (NM_001122734, intron 4 of 6).4	-32645	NM_001122734	100039934	Mm.474426	NM_001122734	ENSMUSG00000095621	Gm15085	-	predicted gene 15085	protein-coding
chr6	145545985	145546358	Intergenic	Intergenic	-69792	NM_009449	22147	Mm.270295	NM_009449	ENSMUSG00000067338	Tuba3b	M[a]7|Tuba7	tubulin, alpha 3B	protein-coding
chr2	32451910	32452349	promoter-TSS (NM_146118)	promoter-TSS (NM_146118)	-659	NM_001164357	227731	Mm.37395	NM_146118	ENSMUSG00000026819	Slc25a25	1110030N17Rik|MCSC|mKIAA1896	solute carrier family 25 (mitochondrial carrier, phosphate carrier), member 25	protein-coding
chr13	81689586	81689922	intron (NM_001081176, intron 3 of 7)	intron (NM_001081176, intron 3 of 7)	21259	NM_001081176	67486	Mm.279781	NM_001081176	ENSMUSG00000035834	Polr3g	2310047G20Rik|AV275904|RPC32|RPC7	polymerase (RNA) III (DNA directed) polypeptide G	protein-coding
chr13	26909785	26910112	Intergenic	Intergenic	-139783	NM_008232	15192	Mm.7411	NM_008232	ENSMUSG00000045835	Hdgfl1	4921520N01Rik|HRP-1|Hdgfrp1|Pwwp1	HDGF like 1	protein-coding
chr15	88890888	88891635	Intergenic	Intergenic	29067	NM_145478	223775	Mm.400129	NM_145478	ENSMUSG00000035828	Pim3	BC026639|Kid1	proviral integration site 3	protein-coding
chr6	137380397	137380703	exon (NM_011216, exon 5 of 27)	exon (NM_011216, exon 5 of 27)	-30171	NM_001164402	19277	Mm.186361	NM_011216	ENSMUSG00000030223	Ptpro	D28|GLEPP1|PTPBK|PTPROt|PTPU2|PTPoc|PTPphi|Ptpn15|R-PTP-O	protein tyrosine phosphatase, receptor type, O	protein-coding
chr5	57769625	57770029	intron (NM_001310608, intron 1 of 3)	B3A|SINE|B2	51746	NM_018764	54216	Mm.332387	NM_018764	ENSMUSG00000029108	Pcdh7	-	protocadherin 7	protein-coding
chr5	18317311	18317671	intron (NM_010305, intron 1 of 7)	(CTATA)n|Simple_repeat|Simple_repeat	42922	NM_010305	14677	Mm.254629	NM_010305	ENSMUSG00000057614	Gnai1	AU046200|Gialpha1|Gnai-1	guanine nucleotide binding protein (G protein), alpha inhibiting 1	protein-coding
chr15	76659673	76660339	promoter-TSS (NM_001358912)	promoter-TSS (NM_001358912)	148	NM_001358909	16581	Mm.378950	NM_010630	ENSMUSG00000004187	Kifc2	-	kinesin family member C2	protein-coding
chr10	77021298	77021751	non-coding (NR_045882, exon 3 of 3)	non-coding (NR_045882, exon 3 of 3)	8051	NR_152191	100041099	Mm.426631	NR_152191		Gm3137	-	predicted gene, 3137	ncRNA
chr8	33420352	33420529	Intergenic	Intergenic	34115	NM_001098233	75029	Mm.159402	NM_152821	ENSMUSG00000049184	Purg	4930486B15Rik	purine-rich element binding protein G	protein-coding
chr9	96364298	96364778	promoter-TSS (NM_001357213)	promoter-TSS (NM_001357213)	-107	NM_001357212	11933	Mm.424	NM_007502	ENSMUSG00000032412	Atp1b3	AA409958|AI664000|AW212096	ATPase, Na+/K+ transporting, beta 3 polypeptide	protein-coding
chr18	66834671	66835147	Intergenic	Intergenic	25578	NM_016977	17202	Mm.229447	NM_016977	ENSMUSG00000047259	Mc4r	Mc4-r|Pkcp	melanocortin 4 receptor	protein-coding
chr9	13246818	13247369	intron (NM_025534, intron 1 of 8)	intron (NM_025534, intron 1 of 8)	137	NM_025534	66396	Mm.290620	NM_025534	ENSMUSG00000079084	Ccdc82	2310043N13Rik	coiled-coil domain containing 82	protein-coding
chr13	81435882	81436352	intron (NM_054053, intron 68 of 89)	intron (NM_054053, intron 68 of 89)	197027	NM_054053	110789	Mm.288694	NM_054053	ENSMUSG00000069170	Adgrv1	Frings|Gpr98|Mass1|Mgr1|VLGR1	adhesion G protein-coupled receptor V1	protein-coding
chr6	56361804	56362608	5' UTR (NM_001159952, exon 1 of 16)	5' UTR (NM_001159952, exon 1 of 16)	186	NM_001025568	18575	Mm.5145	NM_011054	ENSMUSG00000004347	Pde1c	-	phosphodiesterase 1C	protein-coding
chr1	34236226	34236741	intron (NM_001276764, intron 60 of 102)	intron (NM_001276764, intron 60 of 102)	76223	NM_010081	13518	Mm.336625	NM_010081	ENSMUSG00000026131	Dst	2310001O04Rik|A830042E19Rik|AW554249|BP230|BPAG1-n|Bpag|Bpag1|Macf2|ah|athetoid|dt|mKIAA0728|nmf203|nmf339	dystonin	protein-coding
chr13	21919177	21919487	Intergenic	Intergenic	-22283	NR_035500	100316716		NR_035500	ENSMUSG00000088148	Mir1983	mmu-mir-1983	microRNA 1983	ncRNA
chr7	119023653	119023894	Intergenic	Intergenic	-28562	NM_022420	64297	Mm.103439	NM_022420	ENSMUSG00000008734	Gprc5b	AW125761|Raig2	G protein-coupled receptor, family C, group 5, member B	protein-coding
chr15	18821466	18821686	intron (NM_009865, intron 1 of 11)	intron (NM_009865, intron 1 of 11)	1247	NM_009865	320873	Mm.117794	NM_009865	ENSMUSG00000022321	Cdh10	A830016G23Rik|C030003B10Rik|C030011H18Rik	cadherin 10	protein-coding
chr5	141952220	141952809	intron (NM_177879, intron 8 of 44)	MTEb|LTR|ERVL-MaLR	-448983	NM_199068	17425	Mm.24214	NM_010812	ENSMUSG00000056493	Foxk1	A630048H08Rik|AI463295|Gm10868|Mnf	forkhead box K1	protein-coding
chr11	61336579	61337213	exon (NM_001033542, exon 4 of 17)	exon (NM_001033542, exon 4 of 17)	5964	NM_001033542	380701	Mm.340166	NM_001033542	ENSMUSG00000069855	Slc47a2	4933429E10Rik	solute carrier family 47, member 2	protein-coding
chr2	92008347	92008646	intron (NM_011957, intron 1 of 11)	CpG	15674	NM_011957	26427	Mm.10353	NM_011957	ENSMUSG00000027230	Creb3l1	Oasis	cAMP responsive element binding protein 3-like 1	protein-coding
chr13	65699028	65699447	Intergenic	Intergenic	-350643	NM_001371118
chr16	89938210	89938693	intron (NM_001145886, intron 2 of 27)	intron (NM_001145886, intron 2 of 27)	22376	NM_009384	21844	Mm.310902	NM_009384	ENSMUSG00000002489	Tiam1	AI847750|D16Ium10|D16Ium10e	T cell lymphoma invasion and metastasis 1	protein-coding
chr17	66683332	66683742	intron (NM_008984, intron 28 of 30)	intron (NM_008984, intron 28 of 30)	-30919	NR_151453	102639882	Mm.443262	NR_151453		1700016K05Rik	-	RIKEN cDNA 1700016K05 gene	ncRNA
chr6	4003847	4004260	promoter-TSS (NM_025331)	promoter-TSS (NM_025331)	66	NM_025331	66066	Mm.25547	NM_025331	ENSMUSG00000032766	Gng11	0610037B21Rik	guanine nucleotide binding protein (G protein), gamma 11	protein-coding
chr12	72535994	72536598	promoter-TSS (NM_026327)	promoter-TSS (NM_026327)	-61	NM_026327	67708	Mm.11233	NM_026327	ENSMUSG00000034501	Pcnx4	1810048J11Rik|4932413O10|AU017192|Pcnxl4	pecanex homolog 4	protein-coding
chr5	81329626	81330171	exon (NM_001359834, exon 5 of 27)	exon (NM_001359834, exon 5 of 27)	308305	NM_198702	319387	Mm.273631	NM_198702	ENSMUSG00000037605	Adgrl3	5430402I23Rik|CIRL-3|D130075K09Rik|Gm1379|LEC3|Lphn3|mKIAA0768	adhesion G protein-coupled receptor L3	protein-coding
chr7	4812592	4812968	promoter-TSS (NM_133777)	promoter-TSS (NM_133777)	-440	NM_133777	77891	Mm.389787	NM_133777	ENSMUSG00000060860	Ube2s	0910001J09Rik|6720465F12Rik|AA409170|E2-EPF	ubiquitin-conjugating enzyme E2S	protein-coding
chr11	68431949	68432490	promoter-TSS (NM_177320)	promoter-TSS (NM_177320)	94	NM_177320	320207	Mm.244960	NM_177320	ENSMUSG00000020901	Pik3r5	AV230647|F730038I15Rik|Foap2|p101	phosphoinositide-3-kinase regulatory subunit 5	protein-coding
chr13	65661194	65662115	Intergenic	Intergenic	-313060	NM_001371118
chr10	61452852	61453220	promoter-TSS (NM_010124)	promoter-TSS (NM_010124)	-367	NM_010124	13688	Mm.259516	NM_010124	ENSMUSG00000020091	Eif4ebp2	2810011I19Rik|4E-BP2|AA792569|BC010348|PHAS-II	eukaryotic translation initiation factor 4E binding protein 2	protein-coding
chr8	77610510	77610924	promoter-TSS (NM_145599)	promoter-TSS (NM_145599)	-3	NM_001364445	234463	Mm.273578	NM_145599	ENSMUSG00000031617	Tmem184c	8430433H16Rik|AI645453|AL033298|BC004056|Tmem34	transmembrane protein 184C	protein-coding
chr13	49814299	49815118	Intergenic	Intergenic	132578	NM_172015	105148	Mm.21118	NM_172015	ENSMUSG00000037851	Iars	2510016L12Rik|AI327140|AU044614|E430001P04Rik|ILRS	isoleucine-tRNA synthetase	protein-coding
chr2	154712326	154712575	Intergenic	Intergenic	55424	NM_029362	75608	Mm.262480	NM_029362	ENSMUSG00000038467	Chmp4b	2010012F05Rik|C76846|Snf7-2	charged multivesicular body protein 4B	protein-coding
chr11	83610509	83611106	intron (NR_036452, intron 3 of 8)	RMER19A|LTR|ERVK	-17720	NM_009139	20305	Mm.137	NM_009139	ENSMUSG00000018927	Ccl6	MRP-1|Scya6|c10	chemokine (C-C motif) ligand 6	protein-coding
chr4	149955015	149955509	promoter-TSS (NM_029035)	promoter-TSS (NM_029035)	-256	NM_029035	74646	Mm.30	NM_029035	ENSMUSG00000039911	Spsb1	1110014L01Rik|4930422J18Rik|AI596360|AI854583|SSB-1|SSB1	splA/ryanodine receptor domain and SOCS box containing 1	protein-coding
chr3	67262565	67264010	intron (NM_001356280, intron 5 of 7)	intron (NM_001356280, intron 5 of 7)	-110810	NM_010801	17349	Mm.10414	NM_010801	ENSMUSG00000048416	Mlf1	HLS7	myeloid leukemia factor 1	protein-coding
chr7	25325306	25325675	intron (NM_001160400, intron 1 of 40)	ZP3AR|Satellite|Satellite	8326	NM_001160400	269878	Mm.38527	NM_001160400	ENSMUSG00000045039	Megf8	AW049492|Egfl4|b2b1702.2Clo|b2b1702Clo|b2b288Clo|m687Ddg|mKIAA0817	multiple EGF-like-domains 8	protein-coding
chr1	132602214	132602597	intron (NM_001160318, intron 18 of 26)	intron (NM_001160318, intron 18 of 26)	40453	NM_001160316	269116	Mm.326702	NM_182716	ENSMUSG00000026442	Nfasc	AA387016|D430023G06Rik|NF|mKIAA0756	neurofascin	protein-coding
chr13	65528495	65529134	Intergenic	Intergenic	-180220	NM_001371118
chr6	85915793	85916348	promoter-TSS (NM_001362065)	promoter-TSS (NM_001362065)	99	NM_001362065	69786	Mm.218434	NM_176842	ENSMUSG00000054226	Tprkb	0610033G21Rik|1810034M08Rik|Cgi-121|DRWMS1|mDRWMS1	Tp53rk binding protein	protein-coding
chr14	42715153	42715598	Intergenic	L1Md_T|LINE|L1	82560	NM_001244671	100042055	Mm.429109	NM_001244671	ENSMUSG00000095226	Gm10377	-	predicted gene 10377	protein-coding
chr2	129198498	129198805	promoter-TSS (NM_001159593)	promoter-TSS (NM_001159593)	-122	NM_015747	20515	Mm.272675	NM_015747	ENSMUSG00000027397	Slc20a1	AI607883|Glvr-1|Glvr1	solute carrier family 20, member 1	protein-coding
chr10	85127902	85128351	promoter-TSS (NM_028832)	promoter-TSS (NM_028832)	-99	NM_028832	74238	Mm.255401	NM_028832	ENSMUSG00000049038	Mterf2	1700007D05Rik|Mterfd3	mitochondrial transcription termination factor 2	protein-coding
chr7	64036203	64036488	Intergenic	Intergenic	-97430	NM_021366	50794	Mm.240473	NM_021366	ENSMUSG00000052040	Klf13	0610043C13Rik|9430029L20Rik|Bteb3|FKLF-2|FKLF2|NSLP1|RFLAT-1|RFLAT1	Kruppel-like factor 13	protein-coding
chr3	107332999	107333731	promoter-TSS (NM_001045807)	promoter-TSS (NM_001045807)	-76	NM_001045807	229700	Mm.27966	NM_001045807	ENSMUSG00000048109	Rbm15	C230088J01Rik|mKIAA1438	RNA binding motif protein 15	protein-coding
chr15	100324148	100324412	Intergenic	Intergenic	-10649	NM_001081471	668178	Mm.425943	NM_001081471	ENSMUSG00000058057	Mettl7a3	Gm10035|Ubie3	methyltransferase like 7A3	protein-coding
chr8	111521909	111522453	promoter-TSS (NM_176923)	promoter-TSS (NM_176923)	-74	NM_176923	319481	Mm.247294	NM_176923	ENSMUSG00000031959	Wdr59	5430401O09Rik|Cdw12	WD repeat domain 59	protein-coding
chr14	53675859	53676739	Intergenic	Intergenic	577630	NM_001113358	13135	Mm.319038	NM_010015	ENSMUSG00000022174	Dad1	AI323713	defender against cell death 1	protein-coding
chr9	57075755	57076367	promoter-TSS (NM_001110350)	promoter-TSS (NM_001110350)	-12	NR_152107	72588	Mm.70350	NR_152107		2700012I20Rik	-	RIKEN cDNA 2700012I20 gene	ncRNA
chr7	27933938	27934214	Intergenic	IAPEY4_I-int|LTR|ERVK	-4618	NM_028538	73430	Mm.379224	NM_028538	ENSMUSG00000070709	Zfp974	1700049G17Rik|AV321011|BB026409	zinc finger protein 974	protein-coding
chr4	145585128	145585494	5' UTR (NM_001324416, exon 1 of 4)	5' UTR (NM_001324416, exon 1 of 4)	111	NM_001324416	433801	Mm.276881	NM_001013808	ENSMUSG00000078502	Gm13212	-	predicted gene 13212	protein-coding
chr2	29551803	29552512	Intergenic	Intergenic	-67563	NM_001039087	107746	Mm.298274	NM_054050	ENSMUSG00000039844	Rapgef1	4932418O06Rik|C3G|Grf2	Rap guanine nucleotide exchange factor (GEF) 1	protein-coding
chr2	126932768	126933135	exon (NM_023220, exon 1 of 15)	exon (NM_023220, exon 1 of 15)	284	NM_023220	66552	Mm.269928	NM_023220	ENSMUSG00000027366	Sppl2a	2010106G01Rik|C130089K23Rik	signal peptide peptidase like 2A	protein-coding
chr9	119894604	119894974	promoter-TSS (NM_026236)	promoter-TSS (NM_026236)	-106	NM_026236	67561	Mm.104789	NM_026236	ENSMUSG00000032512	Wdr48	8430408H12Rik|Uaf1|mKIAA1449	WD repeat domain 48	protein-coding
chr10	128821452	128822041	promoter-TSS (NM_001359407)	promoter-TSS (NM_001359407)	-18	NM_001359406	66118	Mm.235562	NM_025364	ENSMUSG00000078427	Sarnp	1110005A23Rik|Cip29	SAP domain containing ribonucleoprotein	protein-coding
chr17	6429891	6430211	promoter-TSS (NM_009342)	promoter-TSS (NM_009342)	-61	NM_009342	21648	Mm.1948	NM_009342	ENSMUSG00000096255	Dynlt1b	AGS2|Dynlt1|Tctex-1|Tctex1	dynein light chain Tctex-type 1B	protein-coding
chr17	56861343	56861565	intron (NM_001039114, intron 6 of 14)	intron (NM_001039114, intron 6 of 14)	12993	NM_001039114	328845	Mm.179421	NM_001039114	ENSMUSG00000024207	Acsbg2	Bgr	acyl-CoA synthetase bubblegum family member 2	protein-coding
chr7	68749213	68749723	promoter-TSS (NM_025549)	promoter-TSS (NM_025549)	-230	NM_025549	66412	Mm.251199	NM_025549	ENSMUSG00000042659	Arrdc4	2410003C09Rik|AV216361	arrestin domain containing 4	protein-coding
chrY	90812853	90813193	intron (NM_133362, intron 2 of 3)	(TTAGGG)n|Simple_repeat|Simple_repeat	26383	NR_137283	654820	Mm.34441	NM_001039559	ENSMUSG00000072844	G530011O06Rik	-	RIKEN cDNA G530011O06 gene	ncRNA
chr14	87346707	87347540	Intergenic	RMER1A|Other|Other	-69460	NM_001253755	219249	Mm.35168	NM_172605	ENSMUSG00000022019	Tdrd3	4732418C03Rik|6720468N18	tudor domain containing 3	protein-coding
chr17	27324965	27325472	Intergenic	Intergenic	-3167	NR_106075	102466818		NR_106075	ENSMUSG00000099237	Mir7216	Gm27555|mmu-mir-7216	microRNA 7216	ncRNA
chr4	147124703	147125794	Intergenic	Intergenic	-56812	NR_045446	71270	Mm.460830	NR_045446	ENSMUSG00000093617	4933438K21Rik	-	RIKEN cDNA 4933438K21 gene	ncRNA
chr14	8665818	8666464	promoter-TSS (NR_045968)	promoter-TSS (NR_045968)	149	NM_028934	74430	Mm.271901	NM_028934	ENSMUSG00000021747	4930452B06Rik	4933406L09Rik|AI854000	RIKEN cDNA 4930452B06 gene	protein-coding
chr9	86571587	86572351	promoter-TSS (NM_001163746)	promoter-TSS (NM_001163746)	-19	NM_001145969	69519	Mm.272517	NM_027100	ENSMUSG00000032417	Rwdd2a	1700030C20Rik|AI848608|Rwdd2	RWD domain containing 2A	protein-coding
chr10	5194430	5194918	promoter-TSS (NM_001079686)	promoter-TSS (NM_001079686)	33	NM_001079686	64009	Mm.331626	NM_022027	ENSMUSG00000096054	Syne1	8B|A330049M09Rik|BE692247|C130039F11Rik|CPG2|KASH1|Myne1|mKIAA1756|myne-1	spectrin repeat containing, nuclear envelope 1	protein-coding
chr3	19666643	19667725	intron (NM_001081281, intron 4 of 9)	intron (NM_001081281, intron 4 of 9)	22724	NM_001081281	381485	Mm.35419	NM_001081281	ENSMUSG00000060913	Trim55	D830041C10Rik|Murf2|Rnf29	tripartite motif-containing 55	protein-coding
chr5	131497439	131497942	intron (NM_001363480, intron 6 of 19)	ZP3AR|Satellite|Satellite	-82972	NR_152164	545809	Mm.357553	NR_152164	ENSMUSG00000105387	Gm29681	Gm42590	predicted gene, 29681	ncRNA
chr5	140704383	140705252	promoter-TSS (NR_074085)	promoter-TSS (NR_074085)	-194	NM_181066	231841	Mm.271932	NM_172724	ENSMUSG00000000148	Brat1	AA881470|Baat1	BRCA1-associated ATM activator 1	protein-coding
chr15	85634425	85635277	Intergenic	CpG	-53030	NM_009528	22422	Mm.306946	NM_009528	ENSMUSG00000022382	Wnt7b	Wnt-7b	wingless-type MMTV integration site family, member 7B	protein-coding
chr5	110448483	110449054	promoter-TSS (NM_001317042)	promoter-TSS (NM_001317042)	-265	NM_001317042	381668	Mm.348782	NM_028596	ENSMUSG00000043323	Fbrsl1	2410025L10Rik|AI467568|Gm1049|Gm29766|mKIAA1545	fibrosin-like 1	protein-coding
chr8	84066409	84066876	promoter-TSS (NM_009055)	promoter-TSS (NM_009055)	-194	NM_009055	19724	Mm.7892	NM_009055	ENSMUSG00000031706	Rfx1	AI047719|AI385641	regulatory factor X, 1 (influences HLA class II expression)	protein-coding
chr17	26243738	26244610	promoter-TSS (NM_207217)	promoter-TSS (NM_207217)	68	NM_207217	106581	Mm.28844	NM_207217	ENSMUSG00000024187	Fam234a	Itfg3	family with sequence similarity 234, member A	protein-coding
chr2	122186127	122186906	promoter-TSS (NM_026251)	promoter-TSS (NM_026251)	244	NM_028914	74401	Mm.374834	NM_028914	ENSMUSG00000027229	Terb2	4933406J08Rik	telomere repeat binding bouquet formation protein 2	protein-coding
chr9	119322630	119323065	promoter-TSS (NM_001359582)	promoter-TSS (NM_001359582)	-420	NM_133985	108737	Mm.293565	NM_133985	ENSMUSG00000036737	Oxsr1	2210022N24Rik|2810422B09Rik|AI462649|AW209236|Osr1|mKIAA1101	oxidative-stress responsive 1	protein-coding
chr16	22931160	22931737	intron (NM_001083904, intron 2 of 6)	RMER17B|LTR|ERVK	11226	NM_001083904	59083	Mm.28461	NM_021564	ENSMUSG00000022871	Fetub	2310011O17Rik|AI255764|D17980|Gugu	fetuin beta	protein-coding
chr18	16806811	16807092	intron (NM_007664, intron 1 of 15)	CpG	2295	NM_007664	12558	Mm.257437	NM_007664	ENSMUSG00000024304	Cdh2	CDHN|N-CAD|Ncad	cadherin 2	protein-coding
chr16	21989458	21989960	intron (NM_153404, intron 1 of 8)	ID4_|SINE|ID	5833	NM_001083894	239759	Mm.33192	NM_153404	ENSMUSG00000044626	Liph	C130037N08Rik|D16Wsu119e|H06|Lpdlr|P3|PLA1B|lpd1|lpd2|mPA-PLA1	lipase, member H	protein-coding
chr11	68324893	68325145	intron (NM_008744, intron 2 of 6)	ORR1C2|LTR|ERVL-MaLR	61807	NM_008744	18208	Mm.39095	NM_008744	ENSMUSG00000020902	Ntn1	AI561871|BC019633|Netrin-1	netrin 1	protein-coding
chr13	21861730	21862300	Intergenic	Intergenic	28272	NM_001313880	665596	Mm.371766	NM_001097979	ENSMUSG00000069307	Hist1h2bq	Gm13646	histone cluster 1, H2bq	protein-coding
chr4	136021721	136021957	promoter-TSS (NM_013736)	promoter-TSS (NM_013736)	-190	NM_013736	27224	Mm.27663	NM_013736	ENSMUSG00000028668	Eloa	110kDa|AA408125|Tceb3|Tceb3a	elongin A	protein-coding
chr12	33380042	33380317	intron (NR_131031, intron 2 of 3)	intron (NR_131031, intron 2 of 3)	14581	NR_131031	75836	Mm.410807	NR_131031	ENSMUSG00000085664	Atxn7l1os2	4930556N08Rik	ataxin 7-like 1, opposite strand 2	ncRNA
chr8	80918486	80919256	Intergenic	Intergenic	-38352	NM_001301298	14388	Mm.277409	NM_021356	ENSMUSG00000031714	Gab1	AA408973|AW107238	growth factor receptor bound protein 2-associated protein 1	protein-coding
chr8	25899055	25899627	intron (NM_008432, intron 16 of 26)	ORR1B2|LTR|ERVL-MaLR	49718	NM_008432	16532	Mm.289679	NM_008432	ENSMUSG00000031576	Kcnu1	Kcnma3|Slo3|mSlo3	potassium channel, subfamily U, member 1	protein-coding
chr14	33978596	33979060	promoter-TSS (NM_001013777)	promoter-TSS (NM_001013777)	-64	NM_001013777	382867	Mm.343728	NM_001013777	ENSMUSG00000044519	Zfp488	Gm1206|Znf488	zinc finger protein 488	protein-coding
chr5	75314124	75314660	Intergenic	RLTR20C2_MM|LTR|ERVK	137561	NR_105992	102465620		NR_105992	ENSMUSG00000099060	Mir7025	Gm27860|mmu-mir-7025	microRNA 7025	ncRNA
chr4	43596529	43596891	Intergenic	(TCTCTG)n|Simple_repeat|Simple_repeat	-12216	NM_001099314	100039672	Mm.415110	NM_001099314	ENSMUSG00000078719	Msmp	Psmp	microseminoprotein, prostate associated	protein-coding
chr19	44363501	44363858	Intergenic	Intergenic	30353	NM_183216	329065	Mm.313583	NM_183216	ENSMUSG00000050195	Scd4	ACOD4	stearoyl-coenzyme A desaturase 4	protein-coding
chr8	20512157	20512348	Intergenic	Intergenic	-87438	NR_028428	381598	Mm.359054	NM_001024708	ENSMUSG00000071793	2610005L07Rik	2810038F24Rik|6720476A01Rik	cadherin 11 pseudogene	pseudo
chr2	119618076	119618862	promoter-TSS (NM_001042653)	promoter-TSS (NM_001042653)	36	NM_001042653	70645	Mm.246412	NM_001042653	ENSMUSG00000072980	Oip5	5730547N13Rik|Lint-25|Ms18b	Opa interacting protein 5	protein-coding
chr13	57589420	57589698	intron (NM_001166466, intron 4 of 11)	ORR1A2|LTR|ERVL-MaLR	318773	NM_001166464	20745	Mm.379020	NM_009262	ENSMUSG00000056222	Spock1	Spock|Ticn1|testican	sparc/osteonectin, cwcv and kazal-like domains proteoglycan 1	protein-coding
chr18	38992671	38993254	promoter-TSS (NM_001361073)	promoter-TSS (NM_001361073)	-183	NM_001361073	71302	Mm.329396	NM_175164	ENSMUSG00000036452	Arhgap26	1810044B20Rik|2610010G17Rik|4933432P15Rik|AI853435|mKIAA0621	Rho GTPase activating protein 26	protein-coding
chr11	101143885	101144180	Intergenic	Intergenic	-11852	NM_134028	103768	Mm.142348	NM_134028	ENSMUSG00000045007	Tubg2	AI504772|Tubgl	tubulin, gamma 2	protein-coding
chr10	102127990	102128253	intron (NM_001205098, intron 3 of 7)	intron (NM_001205098, intron 3 of 7)	-30737	NM_001162368	67569	Mm.25252	NM_026243	ENSMUSG00000019888	Mgat4c	9130411I17Rik|GntIVh	MGAT4 family, member C	protein-coding
chr13	75707082	75707611	promoter-TSS (NM_138953)	promoter-TSS (NM_138953)	-138	NM_138953	192657	Mm.21288	NM_138953	ENSMUSG00000001542	Ell2	-	elongation factor RNA polymerase II 2	protein-coding
chr12	23597831	23598209	Intergenic	IAPEY4_I-int|LTR|ERVK	499249	NM_001256489	66808	Mm.379124	NM_001256489	ENSMUSG00000073158	9030624G23Rik	-	RIKEN cDNA 9030624G23 gene	protein-coding
chr17	75456293	75456675	intron (NM_001166493, intron 1 of 16)	intron (NM_001166493, intron 1 of 16)	-9054	NM_207246	240168	Mm.329203	NM_207246	ENSMUSG00000071042	Rasgrp3	BC066069|Gm327	RAS, guanyl releasing protein 3	protein-coding
chr10	76943742	76944269	intron (NM_001347216, intron 1 of 15)	L1MB5|LINE|L1	17942	NM_021568	59093	Mm.272803	NM_021568	ENSMUSG00000001120	Pcbp3	AlphaCP-3	poly(rC) binding protein 3	protein-coding
chr6	87775234	87775740	Intergenic	(CAGAG)n|Simple_repeat|Simple_repeat	-2583	NM_018762	54368	Mm.12897	NM_018762	ENSMUSG00000030054	Gp9	Cd42|GPIX	glycoprotein 9 (platelet)	protein-coding
chr2	52378474	52379047	Intergenic	MTC|LTR|ERVL-MaLR	-39962	NM_010889	17996	Mm.389247	NM_010889	ENSMUSG00000026950	Neb	AI595938	nebulin	protein-coding
chr9	13528239	13528540	Intergenic	Intergenic	-91600	NM_001013813	270118	Mm.116898	NM_173776	ENSMUSG00000031925	Maml2	5930431H10|BC032967	mastermind like transcriptional coactivator 2	protein-coding
chr1	105990108	105990470	promoter-TSS (NM_001122675)	promoter-TSS (NM_001122675)	-7	NR_151625	635504	Mm.359717	NR_151625		Gm7160	EG635504	predicted gene 7160	ncRNA
chr1	147430917	147431395	Intergenic	RMER13A|LTR|ERVK	933469	NM_001357572	215378	Mm.441817	NM_153539	ENSMUSG00000035131	Brinp3	B830045N13Rik|Fam5c	bone morphogenetic protein/retinoic acid inducible neural specific 3	protein-coding
chr14	42204781	42205052	Intergenic	L1Md_A|LINE|L1	55132	NR_105055	101056136	Mm.489000	NR_105055	ENSMUSG00000092152	Gm17026	-	predicted gene 17026	ncRNA
chr12	69724611	69725244	promoter-TSS (NM_001361691)	promoter-TSS (NM_001361691)	-18	NM_026536	68055	Mm.27844	NM_026536	ENSMUSG00000054894	Dmac2l	1110015E18Rik|ATPW|Atp5s	distal membrane arm assembly complex 2 like	protein-coding
chr9	71323797	71324133	Intergenic	(CTGTG)n|Simple_repeat|Simple_repeat	108176	NM_009022	19378	Mm.42016	NM_009022	ENSMUSG00000013584	Aldh1a2	AV116159|Aldh1a7|Raldh1|Raldh2	aldehyde dehydrogenase family 1, subfamily A2	protein-coding
chr17	49029747	49030207	intron (NM_027452, intron 1 of 2)	intron (NM_027452, intron 1 of 2)	83556	NR_038141	69311	Mm.46140	NR_038141	ENSMUSG00000101012	1700008K24Rik	-	RIKEN cDNA 1700008K24 gene	ncRNA
chr8	54600722	54601203	exon (NM_133711, exon 1 of 6)	exon (NM_133711, exon 1 of 6)	181	NM_133711	69281	Mm.45833	NM_133711	ENSMUSG00000031518	Spata4	1700001N01Rik|Srg2|TSARG2	spermatogenesis associated 4	protein-coding
chr1	88463379	88463640	Intergenic	RMER5|LTR|ERV1	46557	NM_008132	14659	Mm.5187	NM_008132	ENSMUSG00000062310	Glrp1	GRP-1	glutamine repeat protein 1	protein-coding
chr11	106193352	106194077	promoter-TSS (NM_001252448)	promoter-TSS (NM_001252448)	-111	NM_001252448	72149	Mm.403722	NM_028126	ENSMUSG00000069631	Strada	2610019A05Rik|6030402H20Rik|AI480680|E130112C09Rik	STE20-related kinase adaptor alpha	protein-coding
chr1	46853415	46854181	promoter-TSS (NM_172653)	promoter-TSS (NM_172653)	-180	NM_172653	227059	Mm.233889	NM_172653	ENSMUSG00000025986	Slc39a10	2900042E17Rik|5430433I10|Zip10|mKIAA1265	solute carrier family 39 (zinc transporter), member 10	protein-coding
chr13	43723251	43723446	Intergenic	RMER17B|LTR|ERVK	6557	NR_046022	622552	Mm.375036	NR_046022	ENSMUSG00000110016	Gm20751	-	predicted gene, 20751	ncRNA
chr9	91655465	91656115	Intergenic	B3A|SINE|B2	286818	NM_009576	22774	Mm.8062	NM_009576	ENSMUSG00000036972	Zic4	-	zinc finger protein of the cerebellum 4	protein-coding
chr1	171074346	171074653	Intergenic	Intergenic	-9847	NR_106103	102466998		NR_106103	ENSMUSG00000099119	Mir6546	Gm27408|mmu-mir-6546	microRNA 6546	ncRNA
chr1	71102777	71103347	promoter-TSS (NM_007525)	promoter-TSS (NM_007525)	-90	NM_007525	12021	Mm.10764	NM_007525	ENSMUSG00000026196	Bard1	-	BRCA1 associated RING domain 1	protein-coding
chr17	35058877	35059142	promoter-TSS (NM_001190449)	promoter-TSS (NM_001190449)	-26	NM_001190449	51793	Mm.1457	NM_016765	ENSMUSG00000007039	Ddah2	1110003M04Rik|AU019324|AW413173|DDAH-2|DDAHII|Ddah|G6a|NG30	dimethylarginine dimethylaminohydrolase 2	protein-coding
chr13	62785528	62786101	promoter-TSS (NM_001256065)	promoter-TSS (NM_001256065)	-6	NM_001256065	380850	Mm.439823	NM_001256065	ENSMUSG00000091183	Gm5141	-	predicted gene 5141	protein-coding
chr5	142923985	142924352	Intergenic	ZP3AR|Satellite|Satellite	-17414	NM_007393	11461	Mm.328431	NM_007393	ENSMUSG00000029580	Actb	Actx|E430023M04Rik|beta-actin	actin, beta	protein-coding
chr11	54787231	54787927	5' UTR (NM_178626, exon 1 of 6)	5' UTR (NM_178626, exon 1 of 6)	124	NM_178626	72729	Mm.29476	NM_178626	ENSMUSG00000052298	Cdc42se2	2810404F18Rik|AA408783|AA536669|SPEC2	CDC42 small effector 2	protein-coding
chr8	123682340	123682718	Intergenic	Intergenic	28600	NM_133955	69581	Mm.168257	NM_133955	ENSMUSG00000039960	Rhou	2310026M05Rik|AI182090|Arhu|CDC42L1|G28K|WRCH-1|WRCH1|mG28K	ras homolog family member U	protein-coding
chr6	47767721	47767937	Intergenic	Intergenic	-14904	NR_002841	19799		NR_002841		Rn4.5s	-	4.5S RNA	rRNA
chr13	111489882	111490466	promoter-TSS (NM_001361926)	promoter-TSS (NM_001361926)	-47	NM_028487	73274	Mm.57286	NM_028487	ENSMUSG00000032745	Gpbp1	1700034P14Rik|AU019836|D230035M11Rik|Gpbp|mGPBP	GC-rich promoter binding protein 1	protein-coding
chr12	109423614	109423858	Intergenic	C-rich|Low_complexity|Low_complexity	-29087	NR_033813	13386	Mm.157069	NM_010052	ENSMUSG00000040856	Dlk1	AW742678|DLK-1|DlkI|FA1|Ly107|Peg9|SCP1|ZOG|pG2|pref-1	delta like non-canonical Notch ligand 1	protein-coding
chr7	19175836	19176380	promoter-TSS (NM_001347582)	promoter-TSS (NM_001347582)	-313	NM_001347582	72205	Mm.154121	NM_028153	ENSMUSG00000040811	Eml2	1600029N02Rik|EMAP-2	echinoderm microtubule associated protein like 2	protein-coding
chr13	61804040	61804593	Intergenic	Intergenic	32736	NR_028430	432812	Mm.317358	NR_028430		BC052688	-	cDNA sequence BC052688	pseudo
chrX	136380750	136381336	Intergenic	(TTTTG)n|Simple_repeat|Simple_repeat	87998	NM_177748	245615	Mm.246624	NM_177748	ENSMUSG00000057439	Kir3dl2	Kirl2	killer cell immunoglobulin-like receptor, three domains, long cytoplasmic tail, 2	protein-coding
chr5	146675223	146675507	Intergenic	Intergenic	-90126	NM_001359056	14738	Mm.153539	NM_008151	ENSMUSG00000041468	Gpr12	Gpcr01|Gpcr12|Gpcr20|Gpcr21	G-protein coupled receptor 12	protein-coding
chr1	74332286	74332791	promoter-TSS (NM_019999)	promoter-TSS (NM_019999)	-72	NM_019999	56695	Mm.384726	NM_019999	ENSMUSG00000026179	Pnkd	2210013N15Rik|2810403H05Rik|AI854243|Brp17|MNCb-5687|MR-1|Tahccp2	paroxysmal nonkinesiogenic dyskinesia	protein-coding
chr2	34646350	34646683	Intergenic	Intergenic	108716	NR_151469	66691	Mm.156452	NM_025709	ENSMUSG00000026867	Gapvd1	2010005B09Rik|4432404J10Rik|AW108497|Gapex-5|RAP6|RME-6|mKIAA1521	GTPase activating protein and VPS9 domains 1	protein-coding
chr11	120515625	120516199	Intergenic	Intergenic	-14815	NM_008101	14527	Mm.22329	NM_008101	ENSMUSG00000025127	Gcgr	GR	glucagon receptor	protein-coding
chr13	58476222	58476529	Intergenic	Intergenic	-73032	NM_001301341	15387	Mm.142872	NM_025279	ENSMUSG00000021546	Hnrnpk	Hnrpk|KBBP|NOVA	heterogeneous nuclear ribonucleoprotein K	protein-coding
chr13	22050947	22051219	Intergenic	CpG	7885	NM_178198	319183	Mm.371766	NM_178198	ENSMUSG00000069300	Hist1h2bj	-	histone cluster 1, H2bj	protein-coding
chr6	51362692	51363143	Intergenic	L2a|LINE|L2	-16793	NR_110455	625167	Mm.389772	NR_110455	ENSMUSG00000107660	Gm6559	EG625167	predicted gene 6559	ncRNA
chr4	130264715	130265137	intron (NM_001356465, intron 2 of 9)	intron (NM_001356465, intron 2 of 9)	6508	NM_001356465	230779	Mm.45132	NM_172702	ENSMUSG00000023232	Serinc2	2310004K20Rik|AW121759|FKSG84|TDE2|Tde2l	serine incorporator 2	protein-coding
chr14	51089119	51089723	Intergenic	Intergenic	-1656	NM_021472	58809	Mm.202665	NM_021472	ENSMUSG00000021876	Rnase4	C730049F20Rik|Rab1	ribonuclease, RNase A family 4	protein-coding
chr5	74903191	74903936	Intergenic	Intergenic	-45631	NR_045866	619945	Mm.359372	NM_001037908	ENSMUSG00000072874	Gm6116	EG619945	predicted gene 6116	ncRNA
chr17	6978677	6978926	promoter-TSS (NM_026611)	promoter-TSS (NM_026611)	-59	NM_026611	68195	Mm.181237	NM_026611	ENSMUSG00000094724	Rnaset2b	0610007O07Rik|4833423A10Rik|4930532K22Rik|C79750|RNASE6PL|Rnaset2	ribonuclease T2B	protein-coding
chr12	91778973	91779440	intron (NM_175367, intron 1 of 6)	CpG	7230	NM_175367	108800	Mm.23125	NM_175367	ENSMUSG00000020961	Ston2	4933401N24Rik|AI425999|AW544599	stonin 2	protein-coding
chr16	13940482	13941012	promoter-TSS (NM_001289561)	promoter-TSS (NM_001289561)	82	NM_001289561	93734	Mm.76554	NM_033564	ENSMUSG00000022679	Mpv17l	M-LP	Mpv17 transgene, kidney disease mutant-like	protein-coding
chr5	30887945	30888317	promoter-TSS (NM_174849)	promoter-TSS (NM_174849)	-721	NM_174849	231093	Mm.440364	NM_174849	ENSMUSG00000029165	Agbl5	9430057O19Rik|CCP5	ATP/GTP binding protein-like 5	protein-coding
chr11	109425578	109426023	promoter-TSS (NM_001252193)	promoter-TSS (NM_001252193)	-146	NM_025275	13929	Mm.211850	NM_025275	ENSMUSG00000020610	Amz2	AA408420|ESTM12|X83328	archaelysin family metallopeptidase 2	protein-coding
chr14	5149937	5150173	Intergenic	Intergenic	-13587	NM_001242941	666329	Mm.429277	NM_001242941		Gm3317	100041401	predicted gene 3317	protein-coding
chr13	74062074	74062542	promoter-TSS (NM_028959)	promoter-TSS (NM_028959)	-23	NM_028959	74470	Mm.73234	NM_028959	ENSMUSG00000021572	Cep72	2610029E11Rik|4933440J22Rik	centrosomal protein 72	protein-coding
chr16	20693153	20693516	TTS (NM_145941)	TTS (NM_145941)	-1723	NM_133778	78408	Mm.196512	NM_133778	ENSMUSG00000050821	Fam131a	2900046G09Rik	family with sequence similarity 131, member A	protein-coding
chr4	119733391	119734180	Intergenic	CpG	-74840	NM_008191	14916	Mm.278	NM_008191	ENSMUSG00000032978	Guca2b	AV066530|Gcap2|Ugn	guanylate cyclase activator 2b (retina)	protein-coding
chr2	66784761	66785403	promoter-TSS (NM_009135)	promoter-TSS (NM_009135)	-172	NM_009135	20272	Mm.38127	NM_009135	ENSMUSG00000034810	Scn7a	1110034K09Rik|AI642000|NaG|Nav2|Nav2.3|Nax|Scn6a	sodium channel, voltage-gated, type VII, alpha	protein-coding
chr2	28999742	29000642	intron (NM_001166705, intron 1 of 5)	intron (NM_001166705, intron 1 of 5)	54874	NM_001166705	329375	Mm.425079	NM_001085514	ENSMUSG00000079502	Cfap77	1700101E01Rik|Gm823	cilia and flagella associated protein 77	protein-coding
chr3	79813887	79814180	3' UTR (NM_027495, exon 12 of 12)	3' UTR (NM_027495, exon 12 of 12)	28629	NM_027495	70652	Mm.46635	NM_027495	ENSMUSG00000027956	Tmem144	1110057I03Rik|5730537D05Rik	transmembrane protein 144	protein-coding
chr3	37062979	37063869	promoter-TSS (NM_009350)	promoter-TSS (NM_009350)	-232	NM_009350	21744	Mm.8122	NM_009350	ENSMUSG00000027719	Adad1	Tenr	adenosine deaminase domain containing 1 (testis specific)	protein-coding
chr11	77649472	77650355	Intergenic	(CTGTG)n|Simple_repeat|Simple_repeat	-36226	NM_001024205	68564	Mm.428996	NM_001024205	ENSMUSG00000037857	Nufip2	1110001M19Rik|9530056D24Rik|AI256692|AI461731|PIG1|mKIAA1321	nuclear fragile X mental retardation protein interacting protein 2	protein-coding
chr9	54981281	54981608	intron (NM_176844, intron 1 of 5)	CpG	564	NM_176844	110835	Mm.103778	NM_176844	ENSMUSG00000035594	Chrna5	Acra-5|Acra5	cholinergic receptor, nicotinic, alpha polypeptide 5	protein-coding
chr3	79886636	79887010	exon (NM_133187, exon 1 of 4)	exon (NM_133187, exon 1 of 4)	893	NM_133187	68659	Mm.427274	NM_133187	ENSMUSG00000027955	Gask1b	1110032E23Rik|2210419I08Rik|AV011458|Ened|Fam198b|GaskbB	golgi associated kinase 1B	protein-coding
chr17	17178861	17179735	promoter-TSS (NM_001357988)	promoter-TSS (NM_001357988)	-7	NM_001357988	626854	Mm.436630	NM_001039232		Gm38396	-	predicted gene, 38396	protein-coding
chr12	87388231	87388676	promoter-TSS (NM_011479)	promoter-TSS (NM_011479)	-98	NM_011479	20773	Mm.565	NM_011479	ENSMUSG00000021036	Sptlc2	LCB2|LCB2a|Spt2	serine palmitoyltransferase, long chain base subunit 2	protein-coding
chr4	107253390	107254090	promoter-TSS (NM_029985)	promoter-TSS (NM_029985)	48	NM_001355460	72938	Mm.21787	NM_028394	ENSMUSG00000063172	Hspb11	2900042B11Rik|IFT25|PP25	heat shock protein family B (small), member 11	protein-coding
chr4	118446049	118446522	intron (NM_010823, intron 9 of 11)	intron (NM_010823, intron 9 of 11)	-8942	NM_023223	107995	Mm.261764	NM_023223	ENSMUSG00000006398	Cdc20	2310042N09Rik|C87100|p55CDC	cell division cycle 20	protein-coding
chr13	85390253	85390792	Intergenic	Intergenic	-101036	NM_145452	218397	Mm.259653	NM_145452	ENSMUSG00000021549	Rasa1	Gap|RasGAP|Rasa	RAS p21 protein activator 1	protein-coding
chr5	74050763	74051284	intron (NM_177561, intron 1 of 8)	ORR1A1|LTR|ERVL-MaLR	17388	NM_177561	69727	Mm.48795	NM_177561	ENSMUSG00000054814	Usp46	1190009E20Rik|2410018I08Rik|AI451644	ubiquitin specific peptidase 46	protein-coding
chr15	84167664	84167937	promoter-TSS (NM_054088)	promoter-TSS (NM_054088)	-16	NM_054088	116939	Mm.390817	NM_054088	ENSMUSG00000041653	Pnpla3	Adpn	patatin-like phospholipase domain containing 3	protein-coding
chr4	102591884	102592371	intron (NM_001177980, intron 2 of 9)	intron (NM_001177980, intron 2 of 9)	2284	NM_001177981	18578	Mm.20181	NM_019840	ENSMUSG00000028525	Pde4b	Dpde4|R74983|dunce	phosphodiesterase 4B, cAMP specific	protein-coding
chr19	40508529	40508774	intron (NM_009166, intron 1 of 23)	(TG)n|Simple_repeat|Simple_repeat	5085	NM_178362	20411	Mm.210815	NM_009166	ENSMUSG00000025006	Sorbs1	2310065E01Rik|9530001P15Rik|CAP|SH3P12|Sh3d5|mKIAA1296	sorbin and SH3 domain containing 1	protein-coding
chr11	96916186	96916778	promoter-TSS (NM_001308183)	promoter-TSS (NM_001308183)	32	NM_030248	80280	Mm.28297	NM_030248	ENSMUSG00000018669	Cdk5rap3	1810007E24Rik|BC002318|C53|C81486|HSF-27|IC53|LZAP|MST016	CDK5 regulatory subunit associated protein 3	protein-coding
chr2	92389347	92389757	intron (NM_001202445, intron 2 of 11)	intron (NM_001202445, intron 2 of 11)	-2106	NR_105966	102466783		NR_105966	ENSMUSG00000099093	Mir7000	Gm27338|mmu-mir-7000	microRNA 7000	ncRNA
chr17	26138287	26138733	promoter-TSS (NM_009733)	promoter-TSS (NM_009733)	-176	NM_009733	12005	Mm.23684	NM_009733	ENSMUSG00000024182	Axin1	AI316800|Axin|Fu|Kb|Ki|fused|kinky|knobbly	axin 1	protein-coding
chr3	7503221	7503644	promoter-TSS (NM_173181)	promoter-TSS (NM_173181)	6	NM_173181	67306	Mm.332366	NM_173181	ENSMUSG00000043542	Zc2hc1a	3110050N22Rik|AI790358|AU023959|Fam164a	zinc finger, C2HC-type containing 1A	protein-coding
chr5	137454611	137455172	intron (NM_011741, intron 20 of 87)	ZP3AR|Satellite|Satellite	22173	NM_011741	22635	Mm.7984	NM_011741	ENSMUSG00000079173	Zan	Zan-test	zonadhesin	protein-coding
chr4	118134818	118135482	promoter-TSS (NM_009176)	promoter-TSS (NM_009176)	-204	NM_009176	20441	Mm.251002	NM_009176	ENSMUSG00000028538	St3gal3	ST3GalIII|ST3N|Siat3|Siat6	ST3 beta-galactoside alpha-2,3-sialyltransferase 3	protein-coding
chr10	56106550	56106852	promoter-TSS (NM_001163833)	promoter-TSS (NM_001163833)	-216	NM_001163833	73390	Mm.181475	NM_133751	ENSMUSG00000047669	Msl3l2	1700060H10Rik	MSL3 like 2	protein-coding
chr16	44195030	44195340	intron (NM_001029889, intron 1 of 7)	CpG	21788	NM_001029889	207806	Mm.310566	NM_001029889	ENSMUSG00000068284	Usf3	5530400K22Rik|Gm1779|Gm608|mKIAA2018	upstream transcription factor family member 3	protein-coding
chr14	99046031	99046517	promoter-TSS (NM_175265)	promoter-TSS (NM_175265)	-103	NM_175265	77744	Mm.23503	NM_175265	ENSMUSG00000022070	Bora	6720463M24Rik|AI317232	bora, aurora kinase A activator	protein-coding
chr16	46010081	46010742	promoter-TSS (NM_001134480)	promoter-TSS (NM_001134480)	2	NM_001134480	433022	Mm.380993	NM_001134480	ENSMUSG00000087141	Plcxd2	AW494639|EG433022	phosphatidylinositol-specific phospholipase C, X domain containing 2	protein-coding
chr1	151209978	151210242	Intergenic	Intergenic	72076	NR_038011	402734	Mm.337666	NR_038011		C730036E19Rik	lncLSTR	RIKEN cDNA C730036E19 gene	ncRNA
chr17	8164984	8165500	promoter-TSS (NM_201230)	promoter-TSS (NM_201230)	-276	NM_001197046	75296	Mm.227250	NM_201230	ENSMUSG00000069135	Fgfr1op	4930553O10Rik|FOP	Fgfr1 oncogene partner	protein-coding
chrX	152342506	152342746	promoter-TSS (NM_029836)	promoter-TSS (NM_029836)	-142	NM_001358369	52808	Mm.9997	NM_029836	ENSMUSG00000041096	Tspyl2	CDA1|CINAP|DENTT|DXBwg1396e|DXHXS1008E|E130307F10Rik	TSPY-like 2	protein-coding
chr4	137250680	137251437	Intergenic	Intergenic	-26577	NM_009523	22417	Mm.20355	NM_009523	ENSMUSG00000036856	Wnt4	Wnt-4	wingless-type MMTV integration site family, member 4	protein-coding
chr8	124707427	124707814	intron (NM_001357357, intron 4 of 19)	intron (NM_001357357, intron 4 of 19)	14374	NM_001357355	234875	Mm.38436	NM_145607	ENSMUSG00000037300	Ttc13	BC017545	tetratricopeptide repeat domain 13	protein-coding
chr3	18223052	18223716	intron (NM_007825, intron 1 of 5)	intron (NM_007825, intron 1 of 5)	19954	NM_007825	13123	Mm.316000	NM_007825	ENSMUSG00000039519	Cyp7b1	AW261589|D3Ertd552e|hct-1	cytochrome P450, family 7, subfamily b, polypeptide 1	protein-coding
chr4	40785844	40786372	Intergenic	MLTR11A|LTR|ERVK	-28223	NM_021535	74255	Mm.289929	NM_021535	ENSMUSG00000028409	Smu1	2600001O03Rik|2610203K23Rik|AB044414|AI845086|AW556129|Bwd	smu-1 suppressor of mec-8 and unc-52 homolog (C. elegans)	protein-coding
chr10	19090865	19091315	Intergenic	RMER21B|LTR|ERV1	-50659	NR_038021	100504265	Mm.383417	NR_038021		Gm20139	-	predicted gene, 20139	ncRNA
chr6	125285714	125286575	promoter-TSS (NM_009446)	promoter-TSS (NM_009446)	-63	NM_009446	22144	Mm.270295	NM_009446	ENSMUSG00000067702	Tuba3a	AI528779|M[a]3|Tuba3	tubulin, alpha 3A	protein-coding
chr4	128654451	128654762	promoter-TSS (NM_001195130)	promoter-TSS (NM_001195130)	-96	NM_001195130	54383	Mm.473738	NM_018774	ENSMUSG00000028796	Phc2	A3galt2|AA415044|D130050K19Rik|D4Ertd810e|Edr2|Mph2|p36	polyhomeotic 2	protein-coding
chr2	26237378	26237732	promoter-TSS (NM_001302956)	promoter-TSS (NM_001302956)	-156	NM_153559	227638	Mm.116769	NM_153559	ENSMUSG00000036327	Qsox2	BC030934|Qscn6l1|Soxn	quiescin Q6 sulfhydryl oxidase 2	protein-coding
chr5	66273895	66274354	intron (NM_027602, intron 3 of 11)	intron (NM_027602, intron 3 of 11)	13283	NM_027602	70918	Mm.23166	NM_027602	ENSMUSG00000029206	Nsun7	4921525L17Rik	NOL1/NOP2/Sun domain family, member 7	protein-coding
chr7	28361355	28361736	intron (NM_001290542, intron 18 of 18)	ZP3AR|Satellite|Satellite	10005	NR_028129	100302567		NR_028129		AF357399	MBI-142	snoRNA AF357399	snoRNA
chr4	41348724	41349243	promoter-TSS (NM_001355509)	promoter-TSS (NM_001355509)	-13	NM_001290454	67123	Mm.289795	NM_023305	ENSMUSG00000028437	Ubap1	2700092A01Rik|NAG20|UBAP-1|Ubap	ubiquitin-associated protein 1	protein-coding
chr17	63863744	63864087	promoter-TSS (NM_001037997)	promoter-TSS (NM_001037997)	-66	NM_001037997	14158	Mm.23039	NM_008000	ENSMUSG00000000127	Fer	AV082135|C330004K01Rik|Fert|Fert2	fer (fms/fps related) protein kinase	protein-coding
chr4	95557114	95557660	promoter-TSS (NM_001113412)	promoter-TSS (NM_001113412)	-120	NM_001113412	75578	Mm.276098	NM_029347	ENSMUSG00000028573	Fggy	2310009E04Rik	FGGY carbohydrate kinase domain containing	protein-coding
chr11	96505981	96506229	intron (NM_001033186, intron 2 of 12)	ORR1B2|LTR|ERVL-MaLR	41514	NM_001177899	78473	Mm.395840	NM_001033186	ENSMUSG00000057058	Skap1	1700091G21Rik|Scap1|Skap-55	src family associated phosphoprotein 1	protein-coding
[truncated: 34,781 more rows]

## Sheet: P0 ProSG SMARCA5
Chr	Start	End	Annotation	Detailed Annotation	Distance to TSS	Nearest PromoterID	Entrez ID	Nearest Unigene	Nearest Refseq	Nearest Ensembl	Gene Name	Gene Alias	Gene Description	Gene Type
[truncated: 51,904 more rows]
