# Supplementary material for: The SMARCA5–DMRT1 Pioneer Complex Establishes Epigenetic Priming to Direct Male Germline Development
Source: Research Square preprint supplement (doi:10.21203/rs.3.rs-7576931/v1), 2025-10-08
Supplement: Supplementary file 6 [file e487bc7e5052959561e6819b.xlsx]

## Sheet: Sheet1
Supplementary Table 6: List of antibodies used in this study
Antibodies	Host speacies	Source	Catalog#	Dilution
Immunostaining
DDX4	Mouse	Abcam	Ab27591	1/500
GATA4	Rabbit	Cell signaling	#36966	1/1000
KIT	Goat	R&D	AF1356	1/1000
ZBTB16	Rabbit	Santa Cruz	sc-22839	1/200
ZBTB16	Goat	R&D	AF2944	1/1000
SMARCA5	Rabbit	Abcam	ab72499	1/500
ZBTB16	Mouse	Santa Cruz	sc-28319	1/500
GCNA	Rat	Abcam	ab82527	1/2000
DDX4	Rabbit	Abcam	ab13840	1/1000
STRA8	Rabbit	Abcam	ab49602	1/500
MEIOSIN	Guinea pig	Gift from Dr. Ishiguro		1/200
GFRa1	Goat	Neuromics	GT15004	1/500
Ki67	Mouse	Cell signaling	#9449	1/200
DMRT1	Rabbit	Gift from Dr. Zarkower		1/1000
GFP	Chicken	Abcam	ab290	1/2000
CUT&Tag
SMARCA5	Rabbit	Abcam	ab72499	1/100
DMRT1	Rabbit	Proteintech	14313-1-AP	1/50
